# Supplementary material for: One-pot synthesis of dihydroquinolones by sequential reactions ofo-aminobenzyl alcohol derivatives with Meldrum's acids
Source: Royal Society of Chemistry journal article supplement (doi:10.1039/d2ob00289b), 2022-01-01
Supplement: d2ob00289b1.pdf [file d2ob00289b1.pdf]

## Electronic Supplementary Information

### One-Pot Synthesis of Dihydroquinolones by Sequential Reactions of *o*-Aminobenzyl Alcohols with Meldrum's acids.

Antonio Arcadi,<sup>a</sup> Andrea Calcaterra,<sup>b</sup> Giancarlo Fabrizi,<sup>b</sup> Andrea Fochetti,<sup>b</sup> Antonella Goggiamani,<sup>b</sup> Antonia Iazzetti,  
\*<sup>c</sup> Federico Marrone,<sup>b</sup> Giulia Mazzocanti,<sup>b</sup> Andrea Serraiocco<sup>b</sup>

<sup>a</sup> *Dipartimento di Chimica, Ingegneria Chimica e Materiali, Facoltà di Ingegneria, Università degli Studi de L'Aquila; Via Vetoio, 67100 Coppito (AQ), Italy*

<sup>b</sup> *Dipartimento di Chimica e Tecnologie del Farmaco, Sapienza, Università di Roma, P. le A. Moro 5, 00185 Rome, Italy.*

<sup>c</sup> *Dipartimento di Scienze Biotechologiche di base, Cliniche Intensivologiche e Perioperatorie, Università Cattolica del Sacro Cuore, L.go Francesco Vito 1, 00168 Rome, Italy.*

#### Contents

- |                                                                                      |      |
|--------------------------------------------------------------------------------------|------|
| 1. Copies of <sup>1</sup> H NMR, <sup>13</sup> C NMR and <sup>19</sup> F NMR spectra | S2   |
| 2. HF calculations on diastereomers <b>9</b> and <b>10</b>                           | S146 |

# 1. Copies of $^1\text{H}$ NMR, $^{13}\text{C}$ NMR and $^{19}\text{F}$ NMR spectra for all compounds

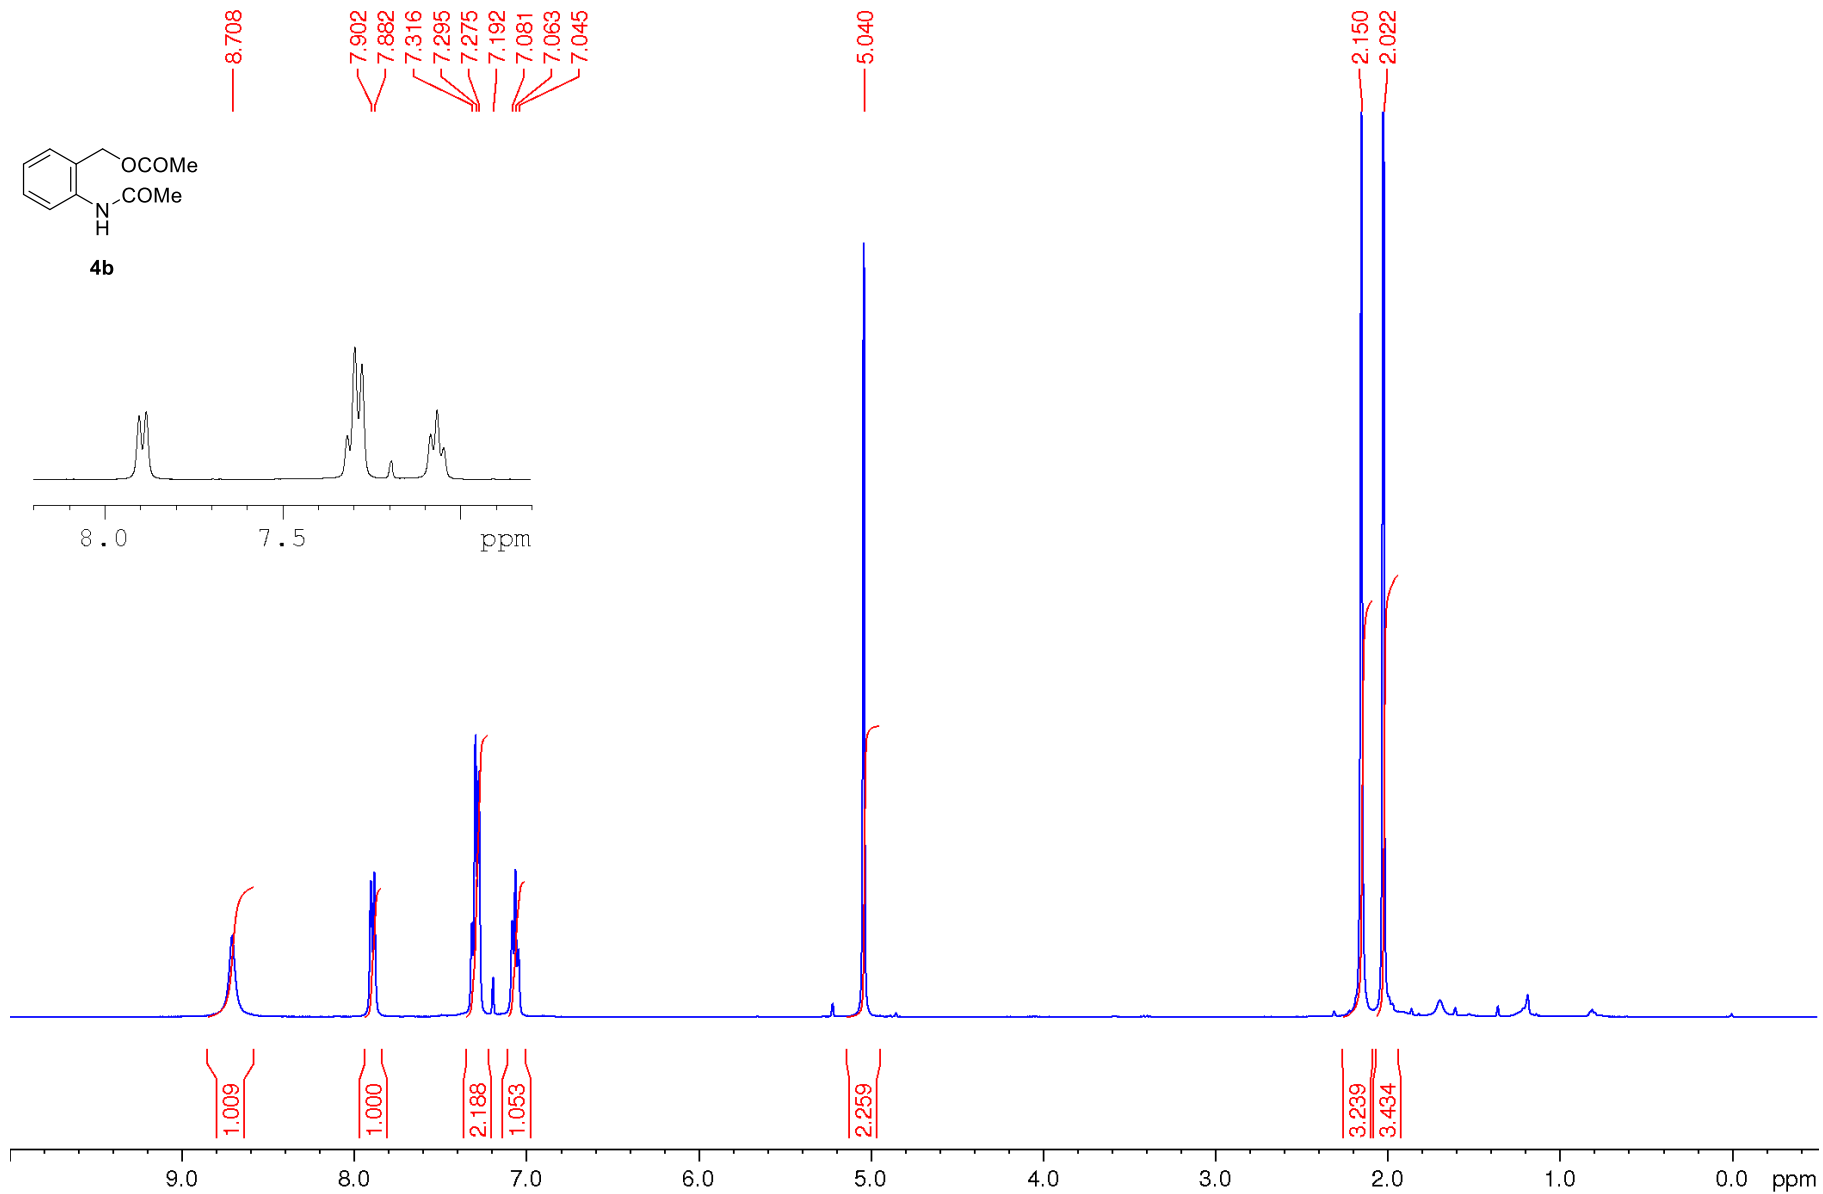

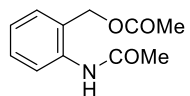

4b

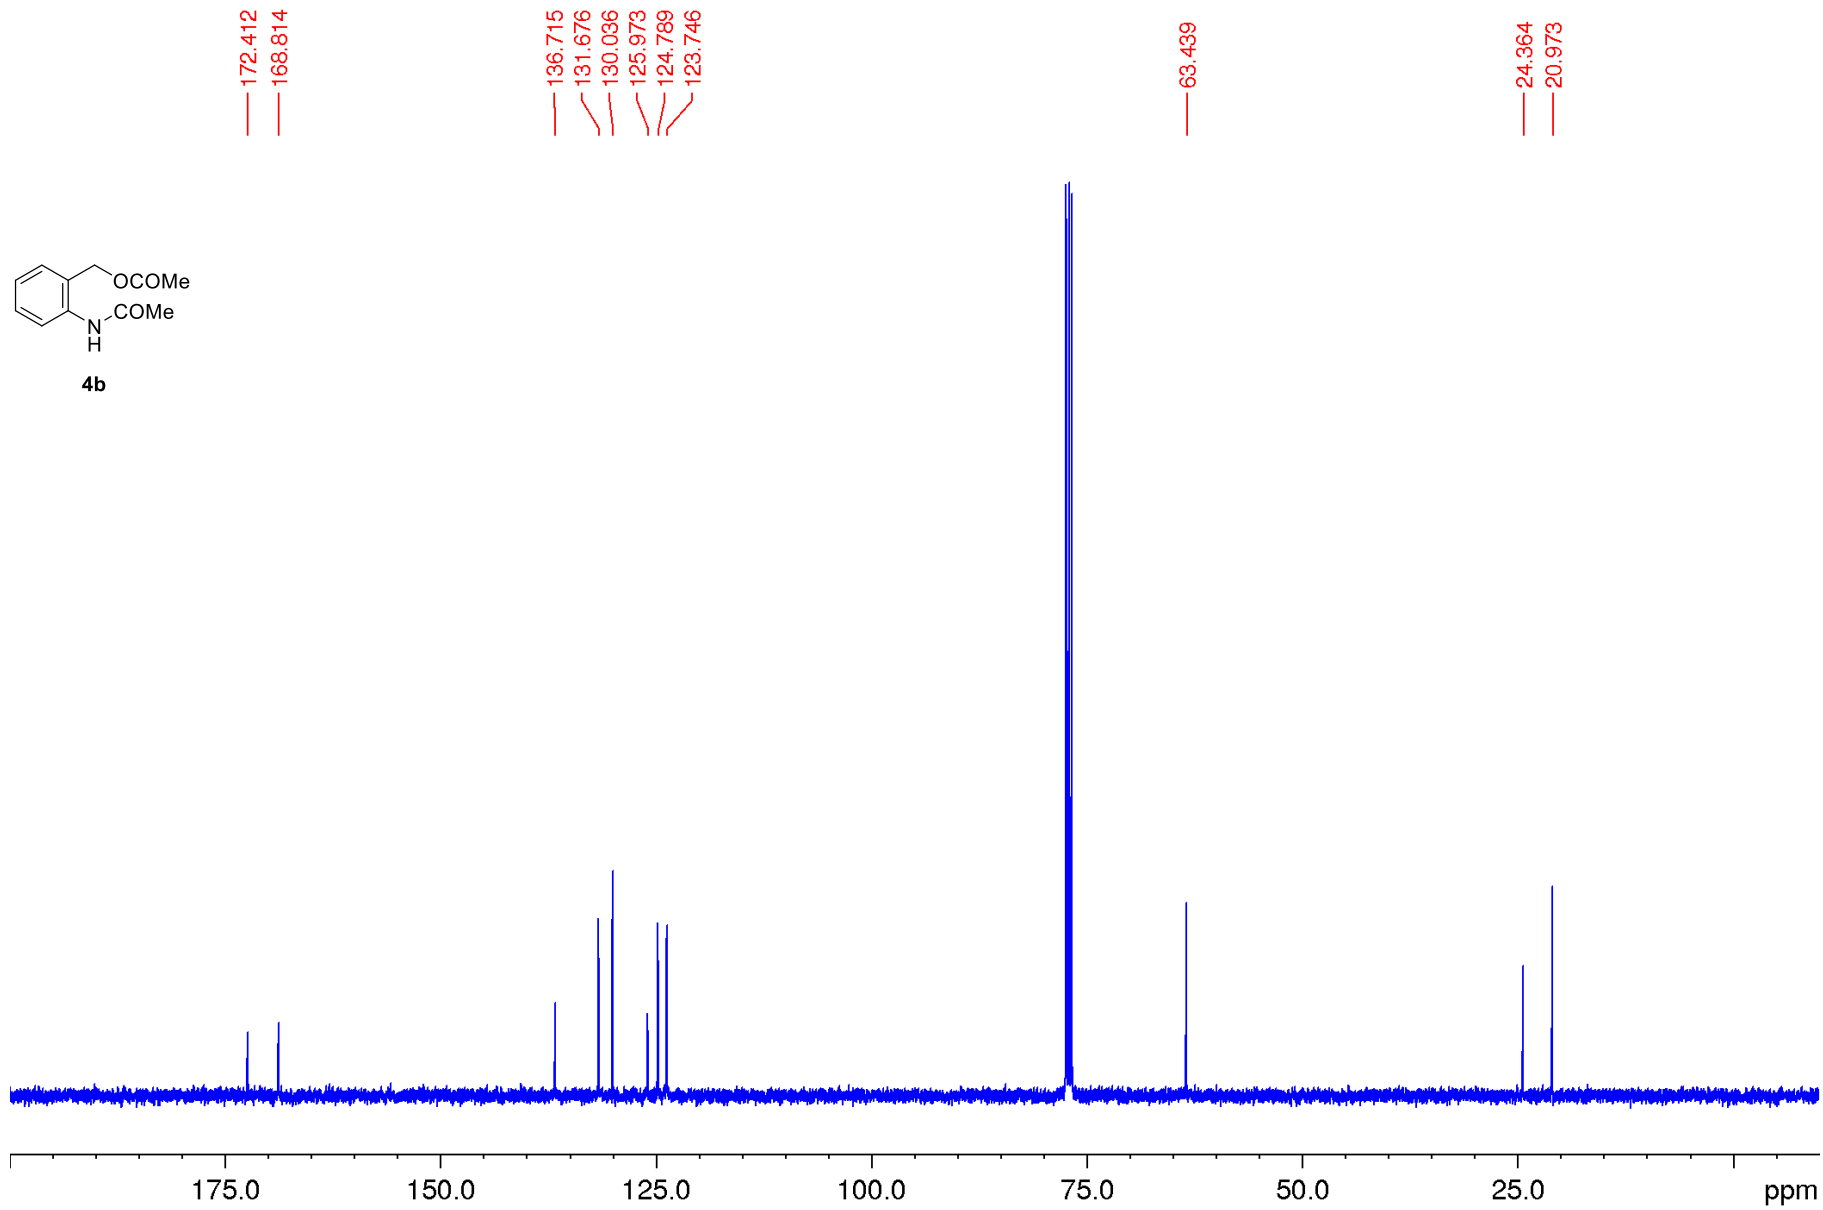

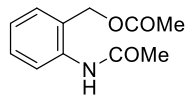

**4b**

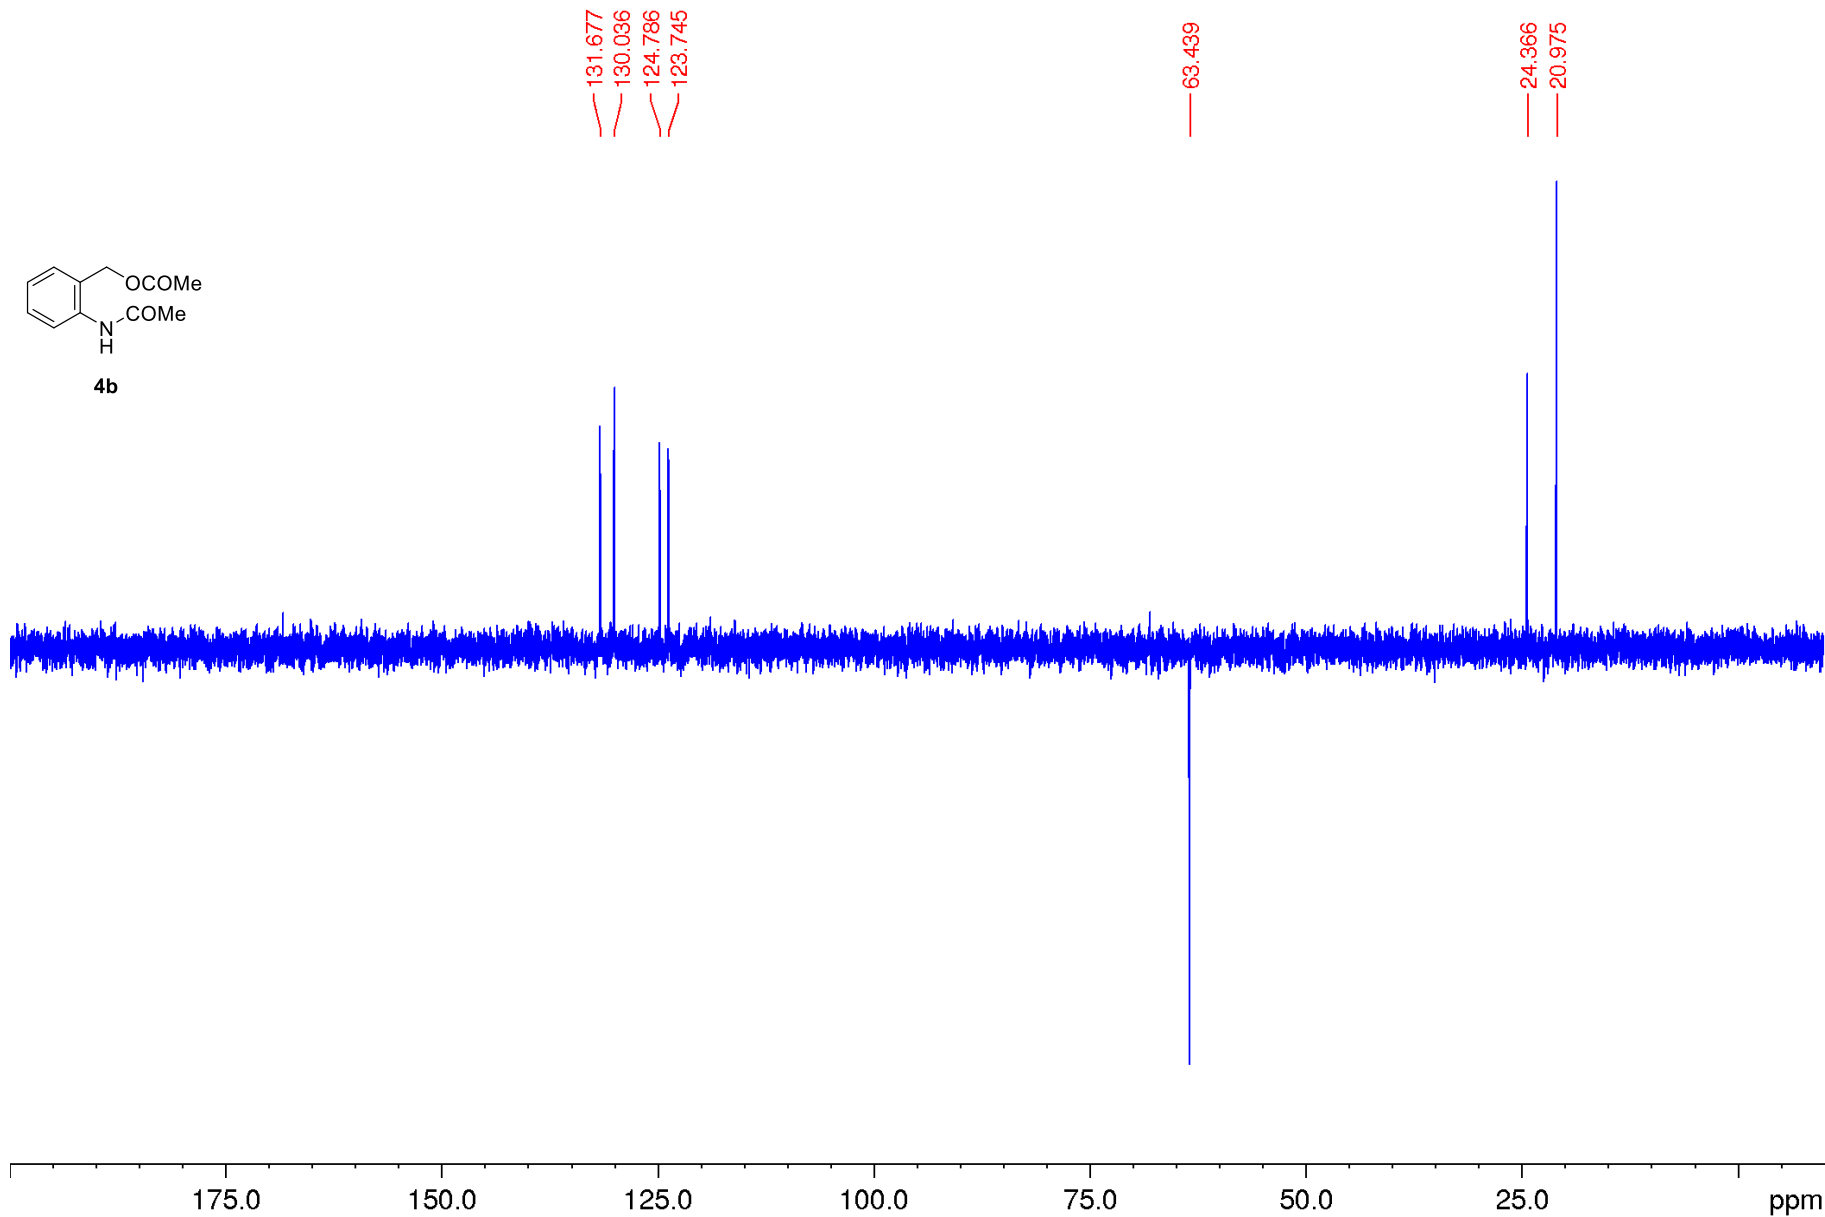



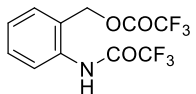

4c

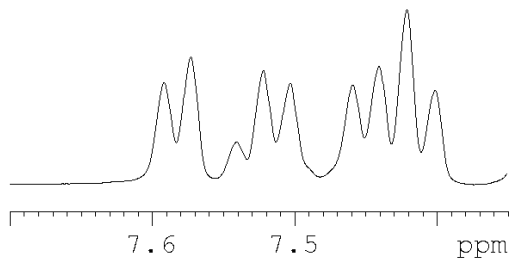

7.591  
7.573  
7.540  
7.522  
7.503  
7.459  
7.440  
7.420  
7.401

11.200

5.462

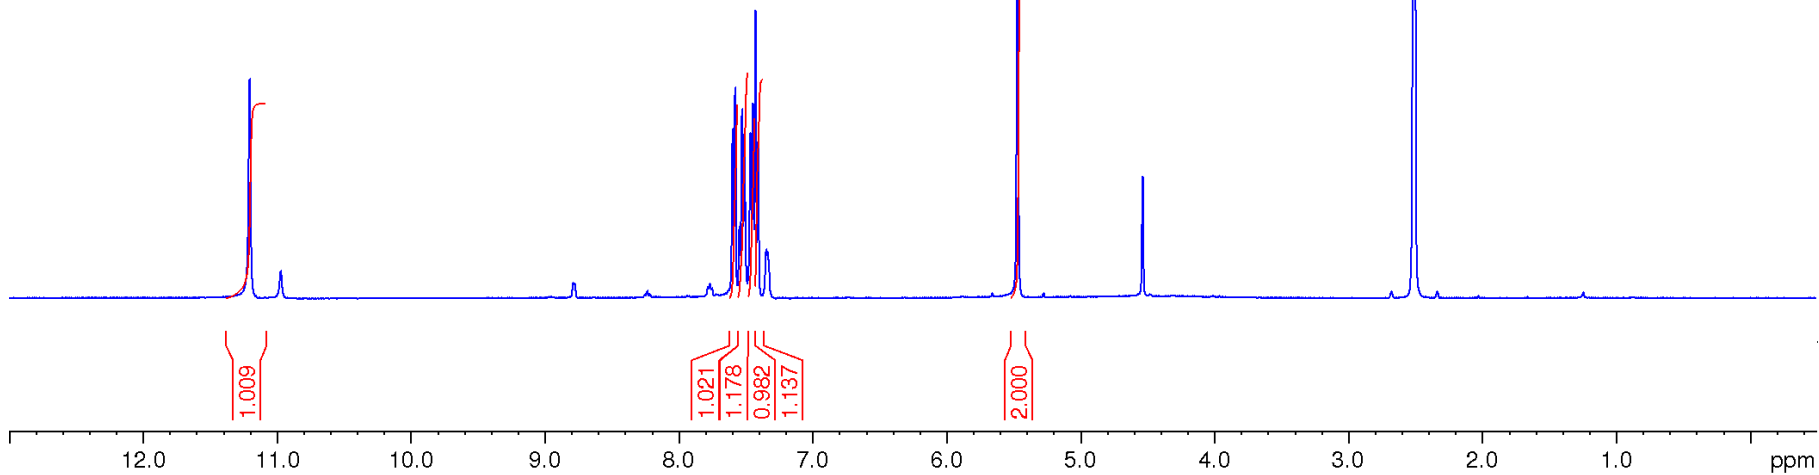

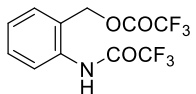

4c

156.876  
156.461  
156.208  
156.050  
155.841  
155.477  
134.086  
131.064  
130.524  
129.988  
128.401  
127.966  
117.863  
116.093  
114.996  
113.252  
66.855

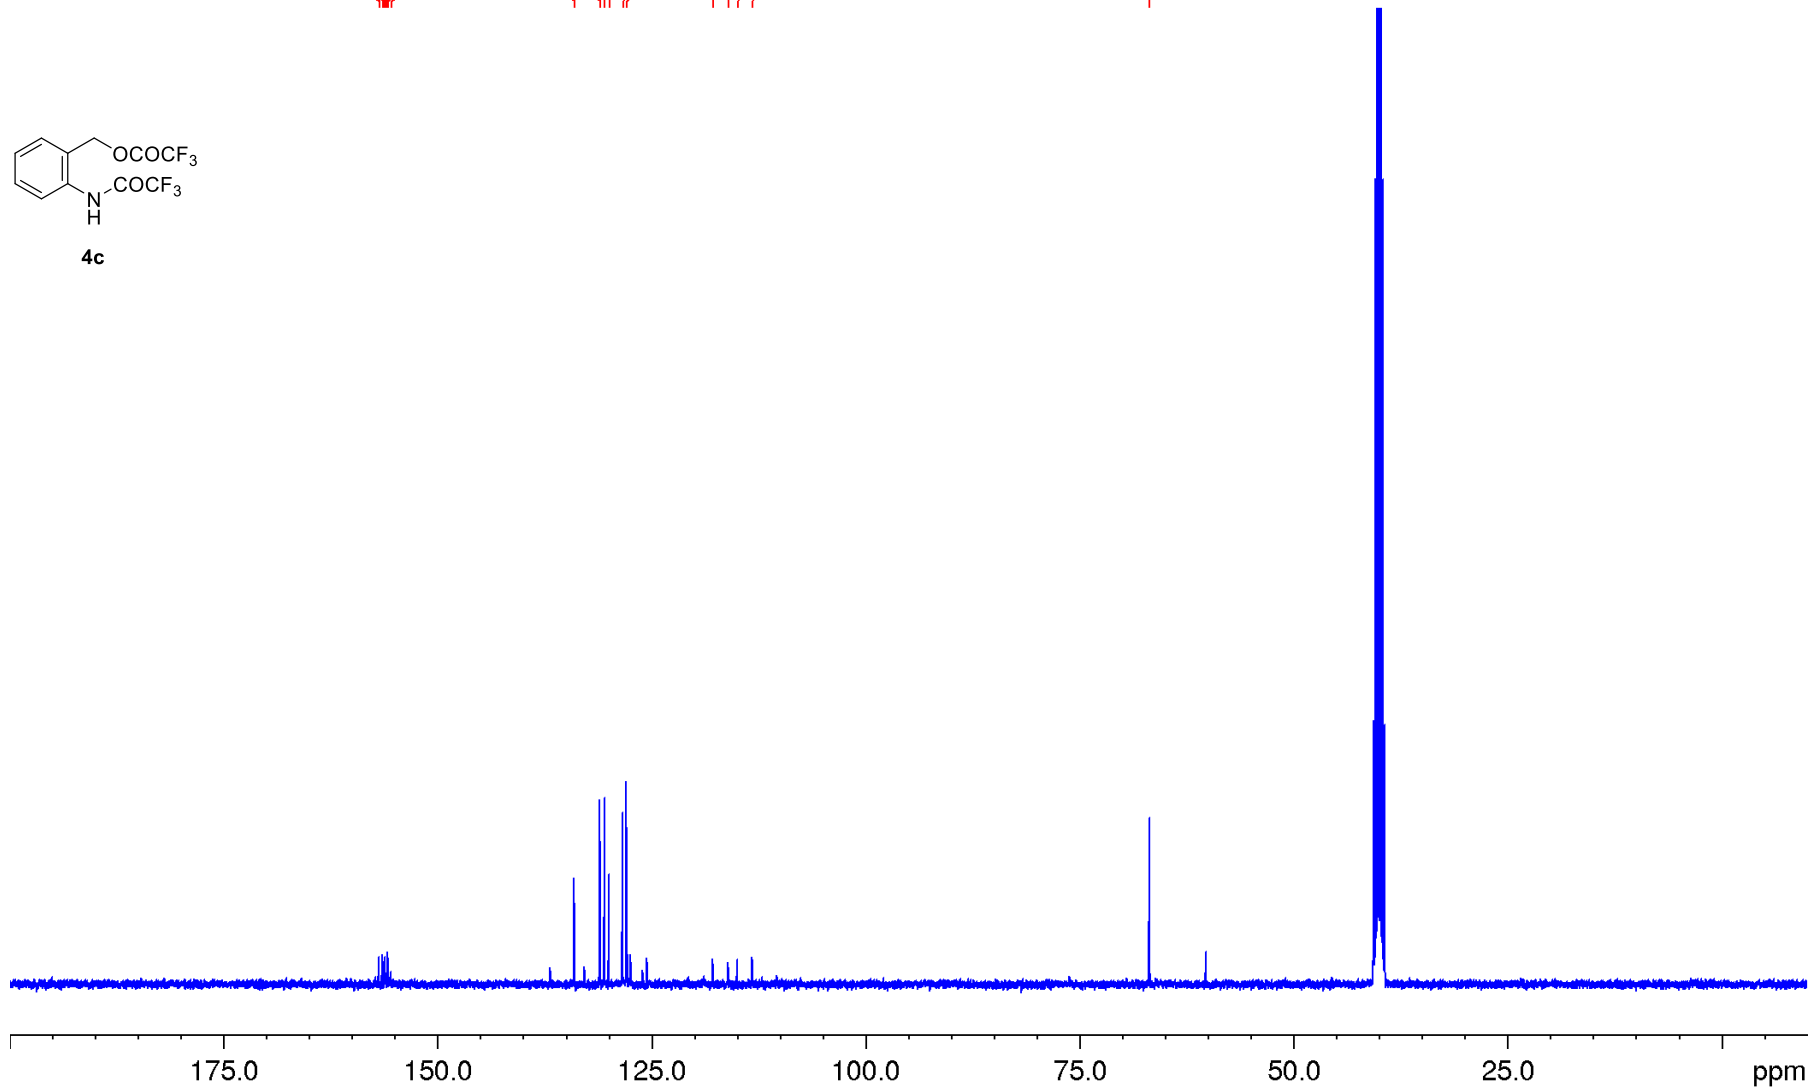

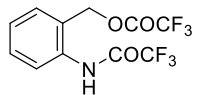

**4c**

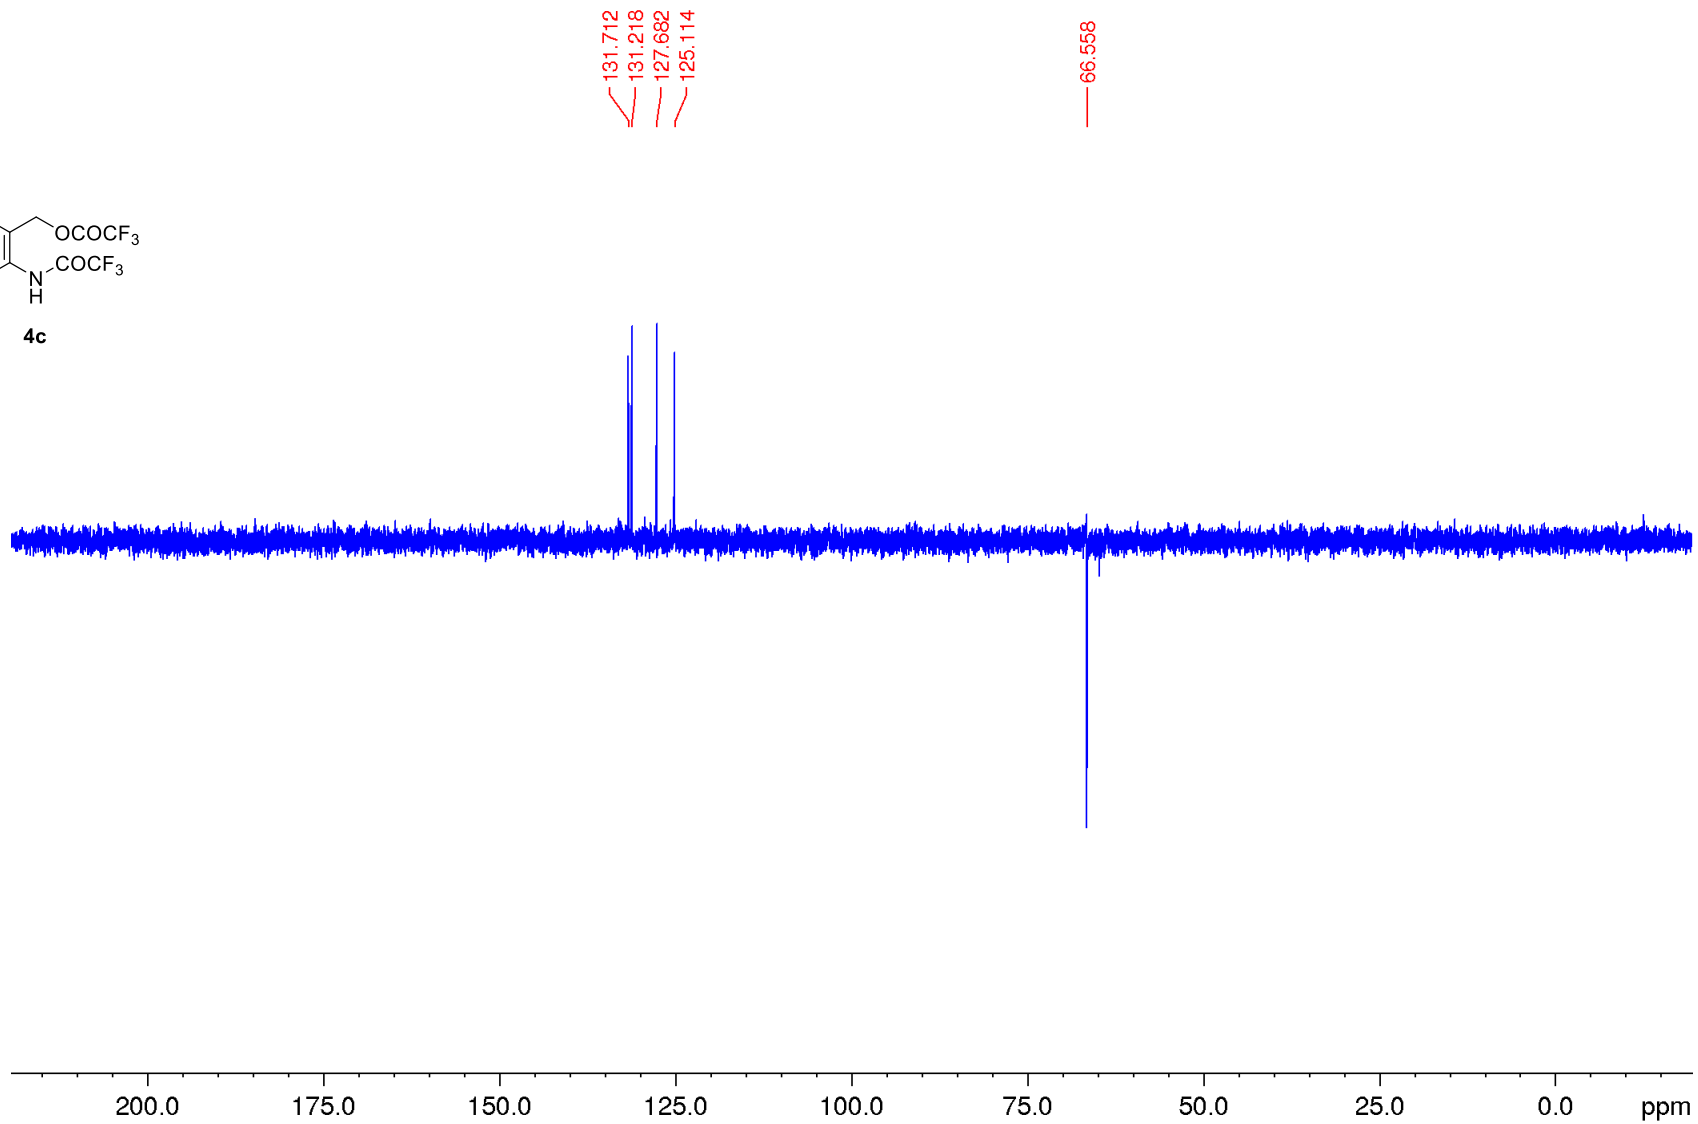

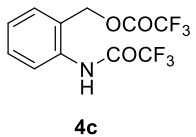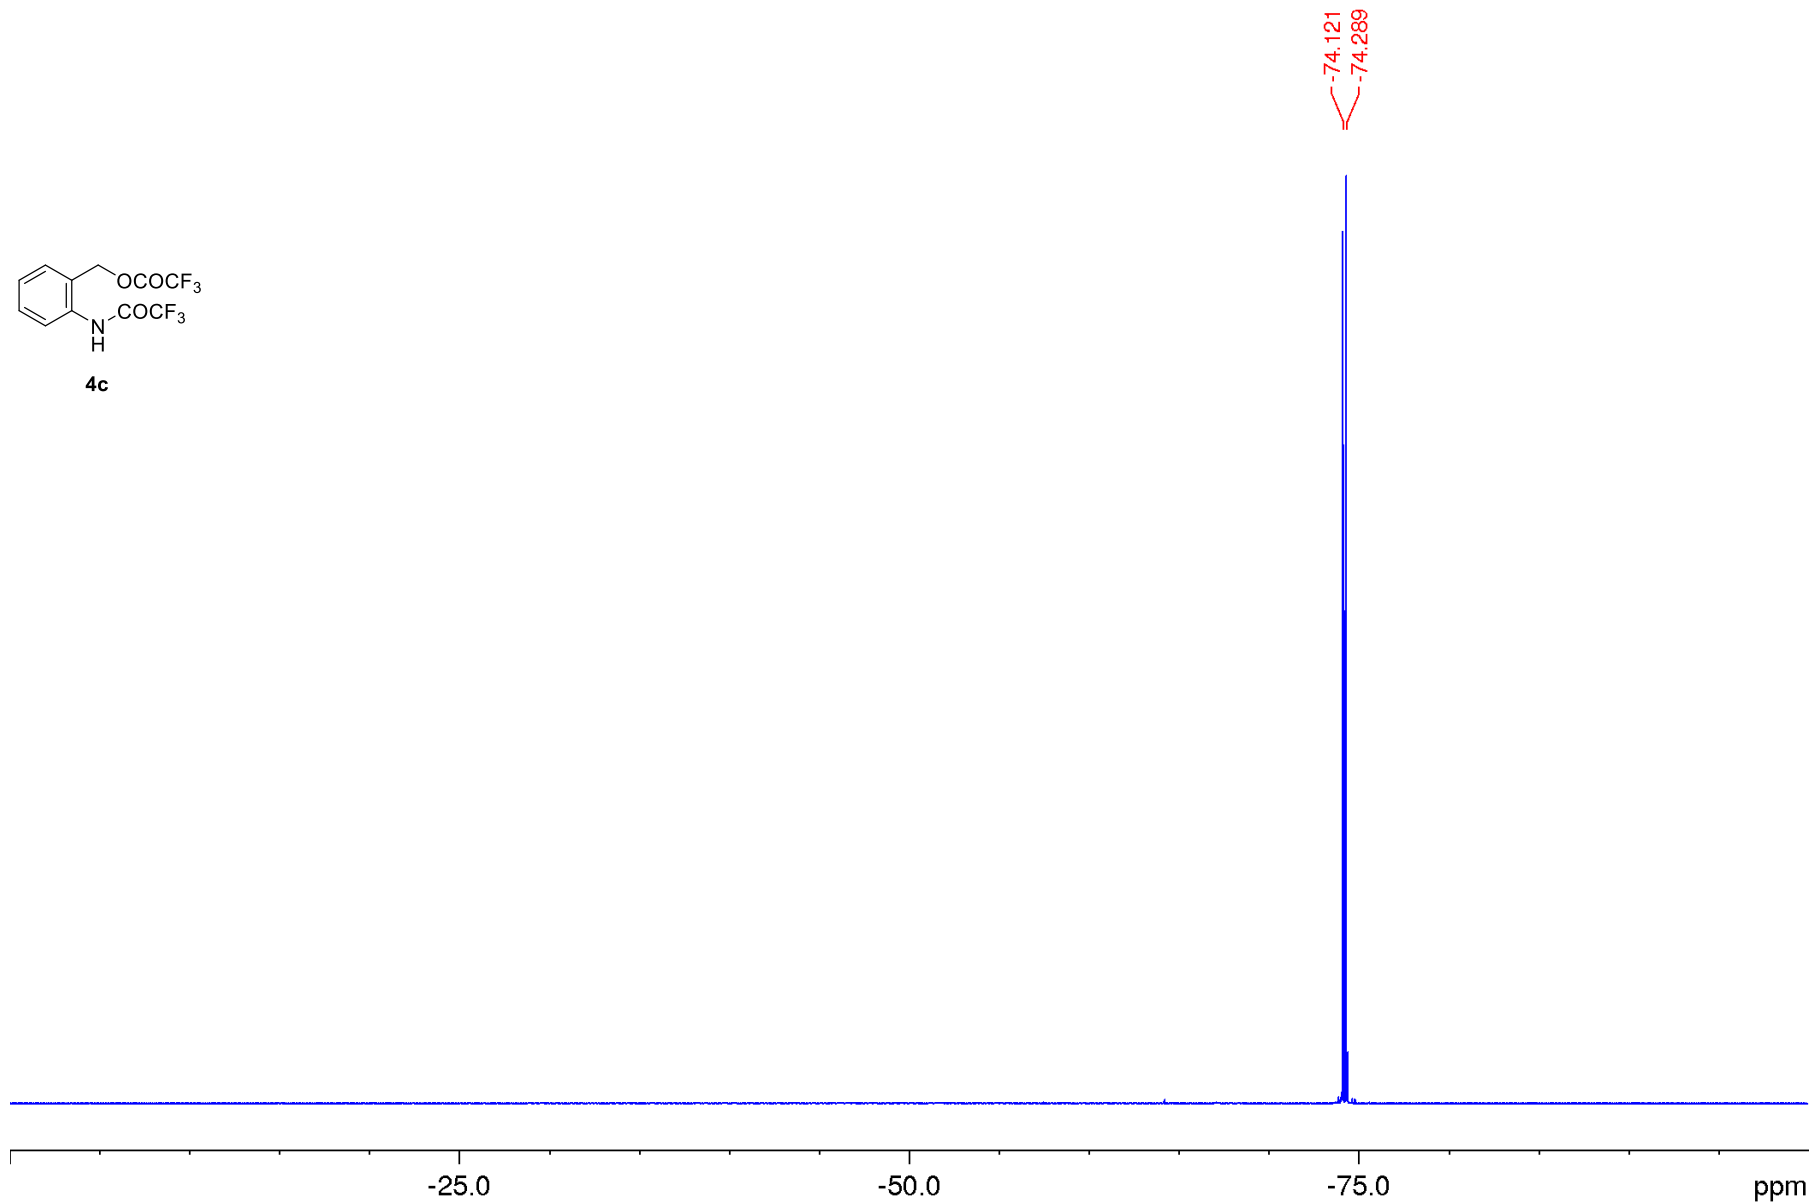

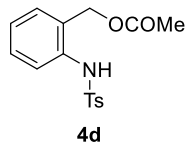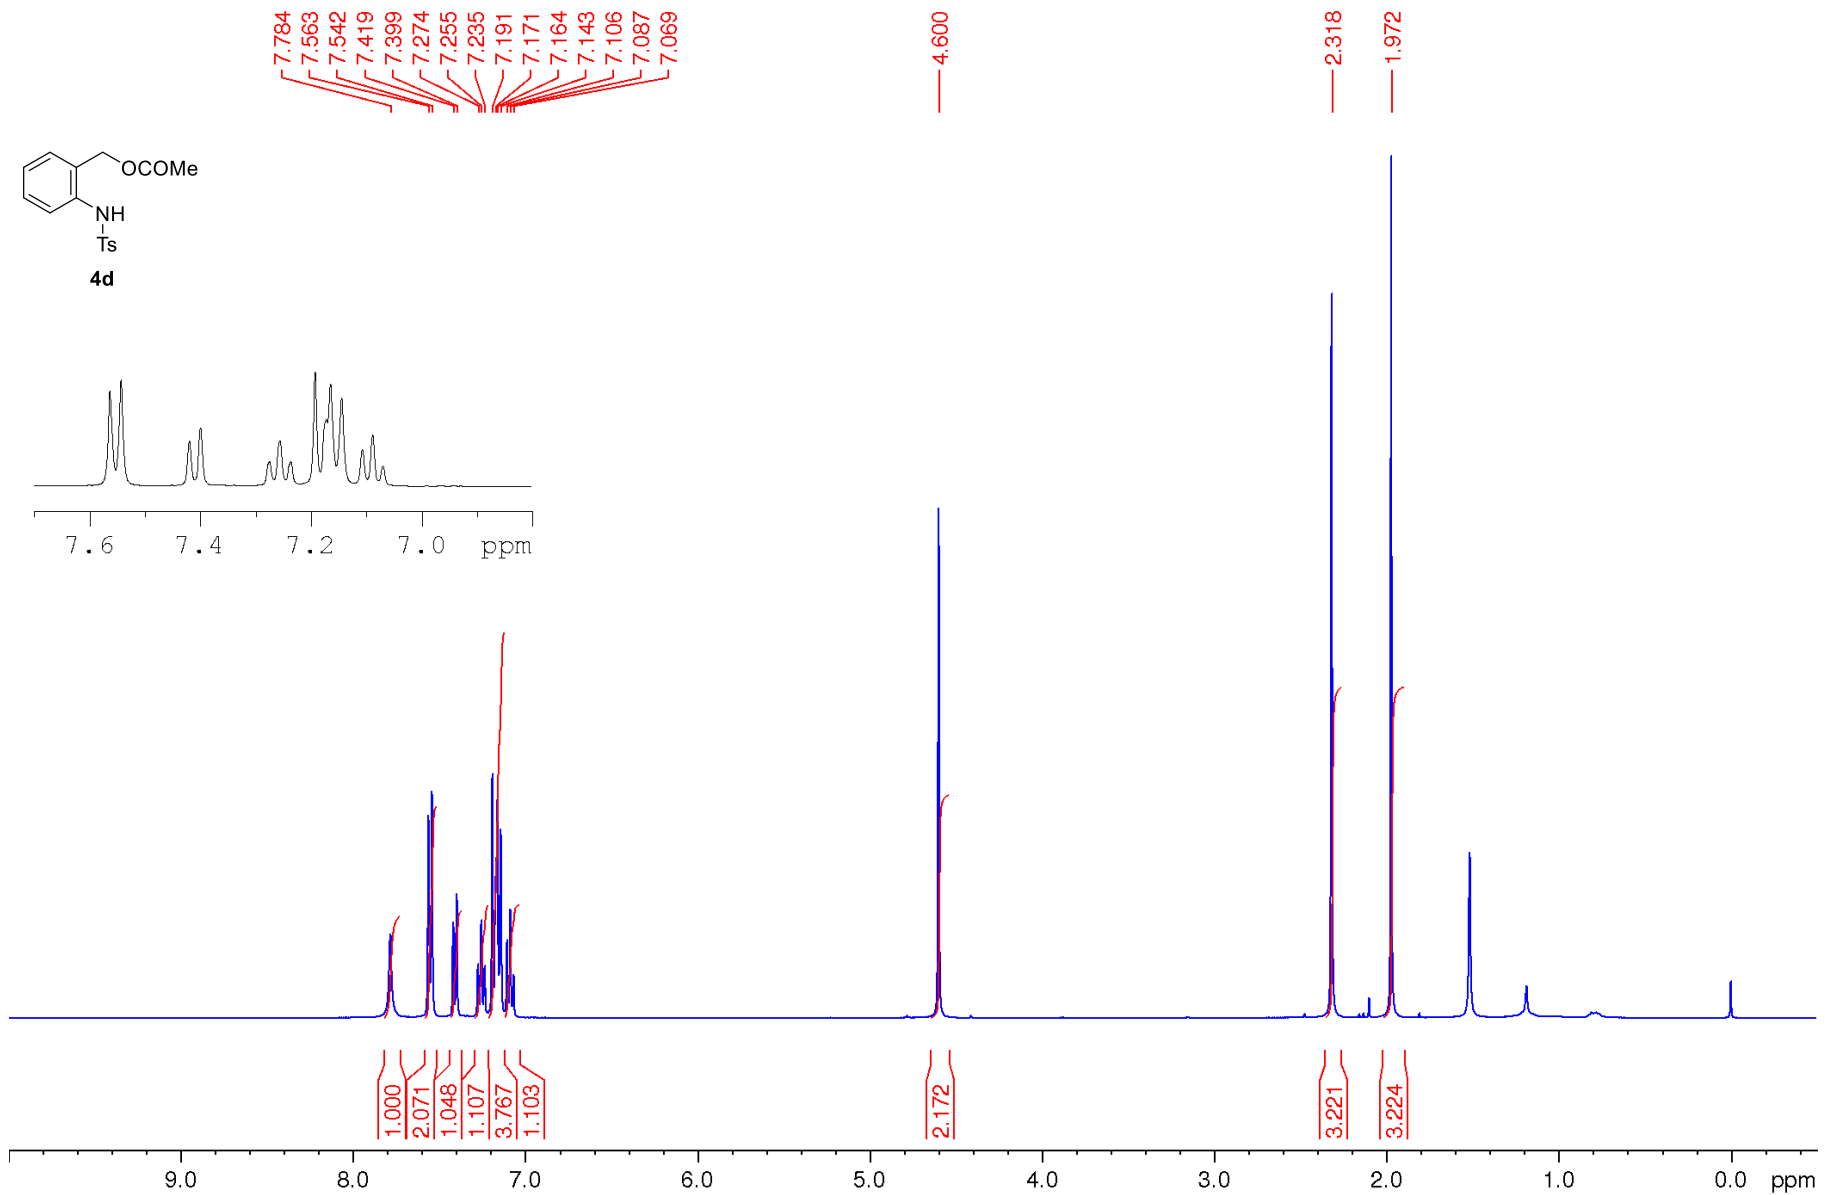

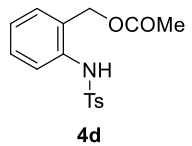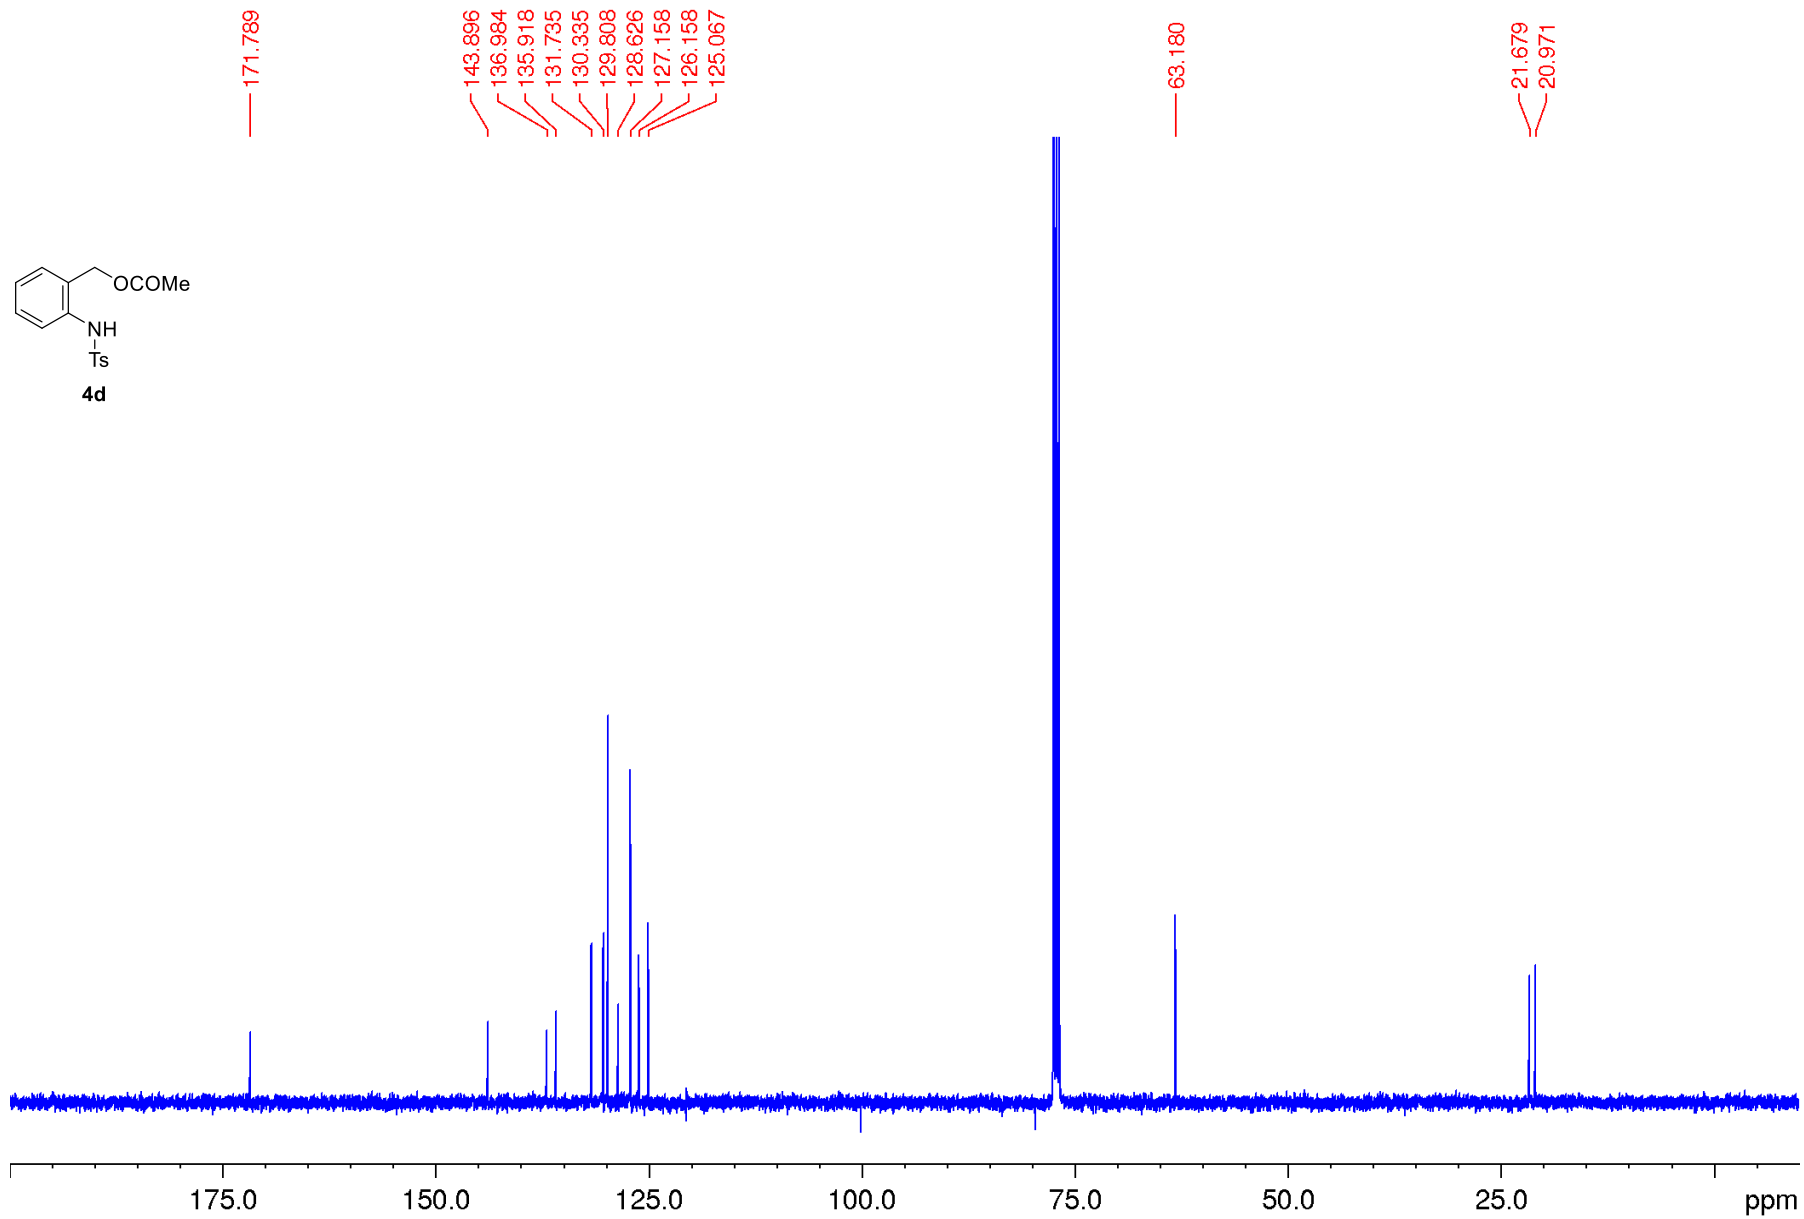

131.604  
130.204  
129.678  
127.026  
126.026  
124.934  
63.051  
21.551  
20.843

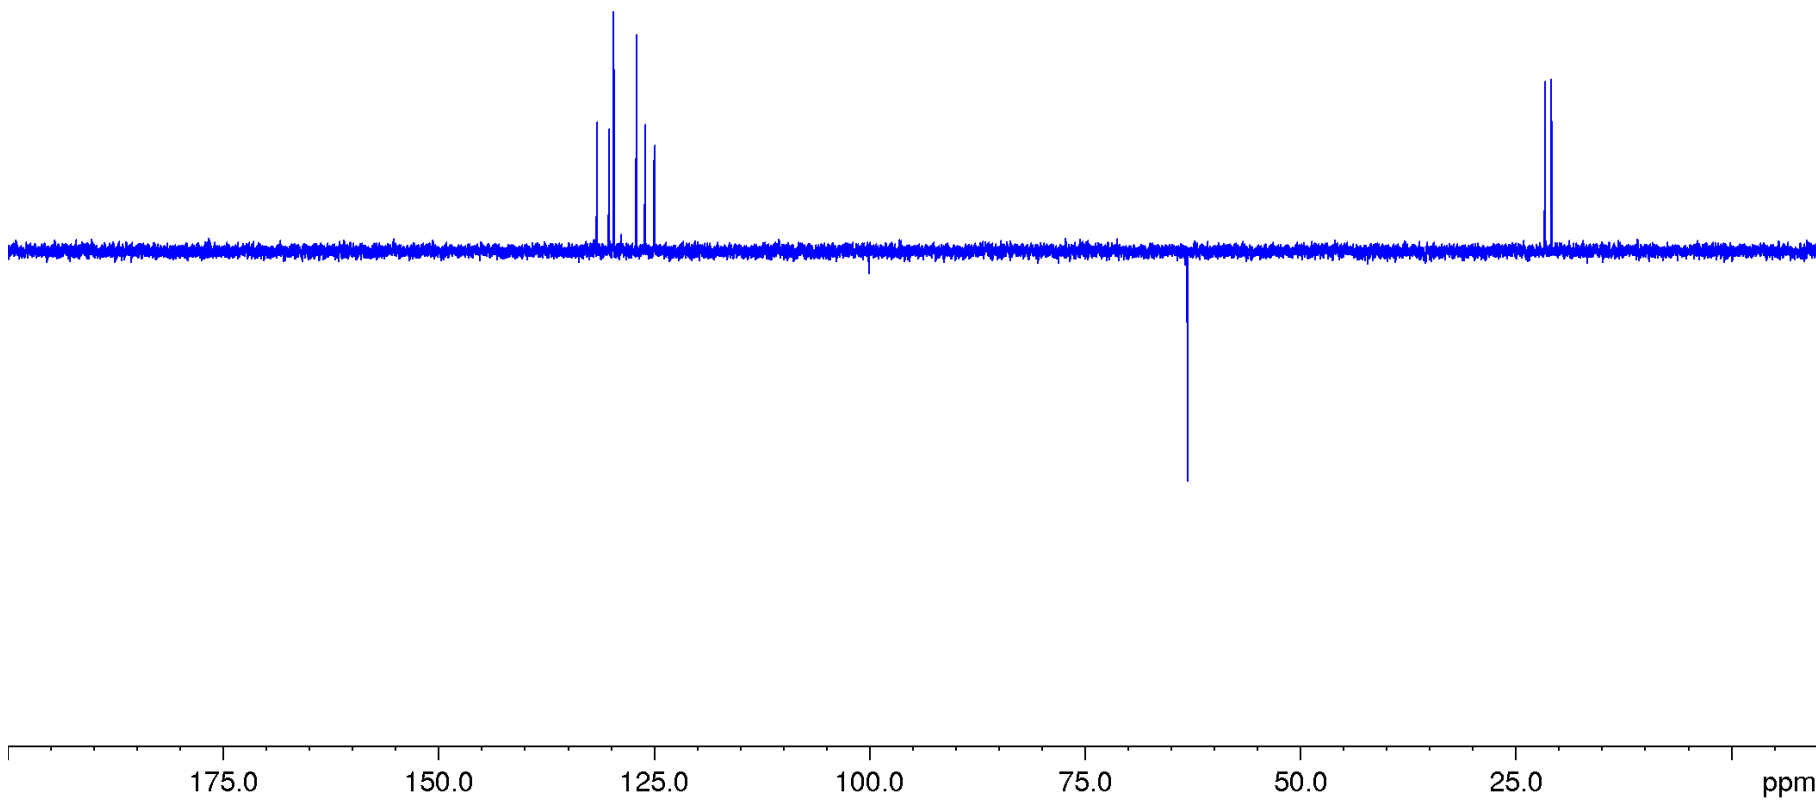

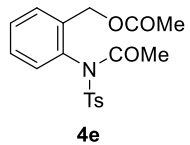

7.880  
7.859  
7.503  
7.484  
7.447  
7.428  
7.409  
7.365  
7.362  
7.346  
7.343  
7.328  
7.324  
7.289  
7.268  
7.190  
7.016  
6.997

5.303  
5.270  
5.116  
5.083

2.385  
2.019  
1.809

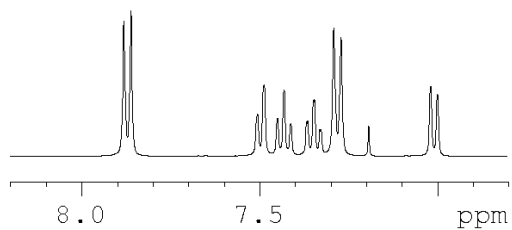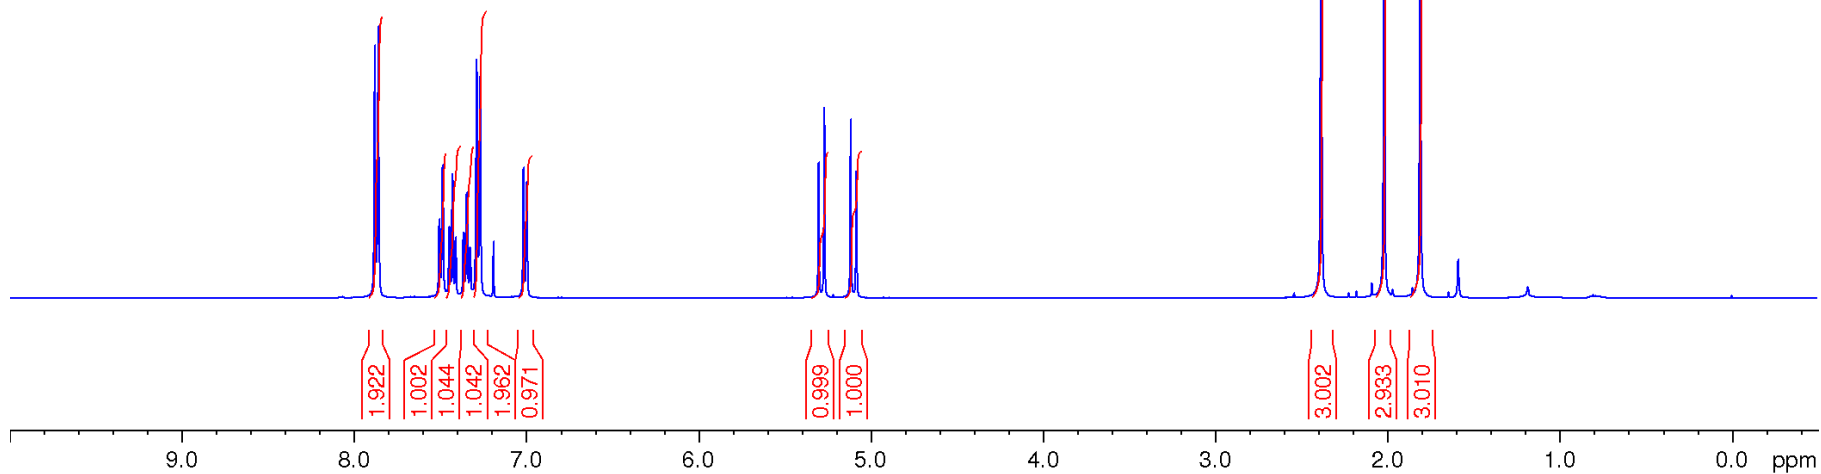



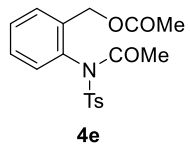

170.513  
170.389

145.359  
136.974  
135.939  
135.909  
130.587  
130.476  
129.834  
129.718  
129.529

62.762

24.905  
21.813  
20.875

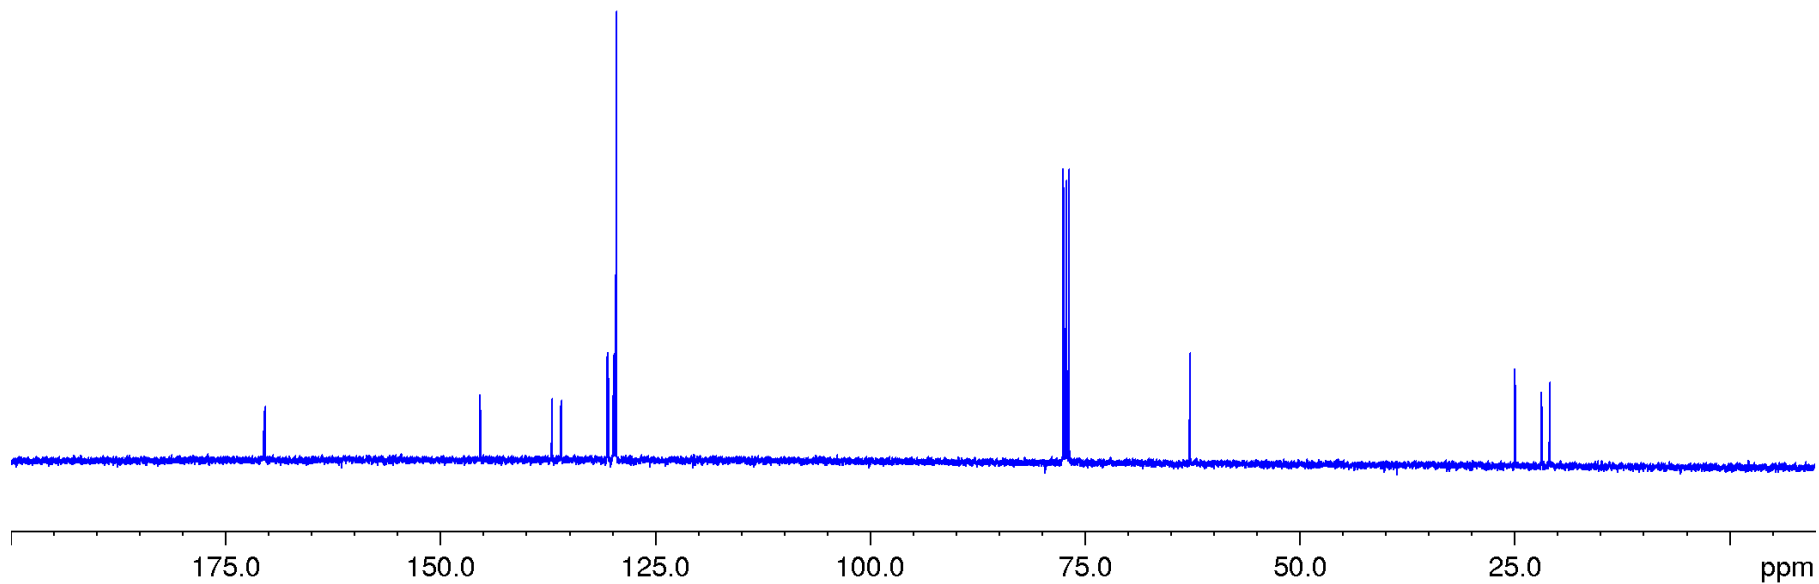

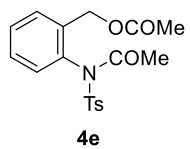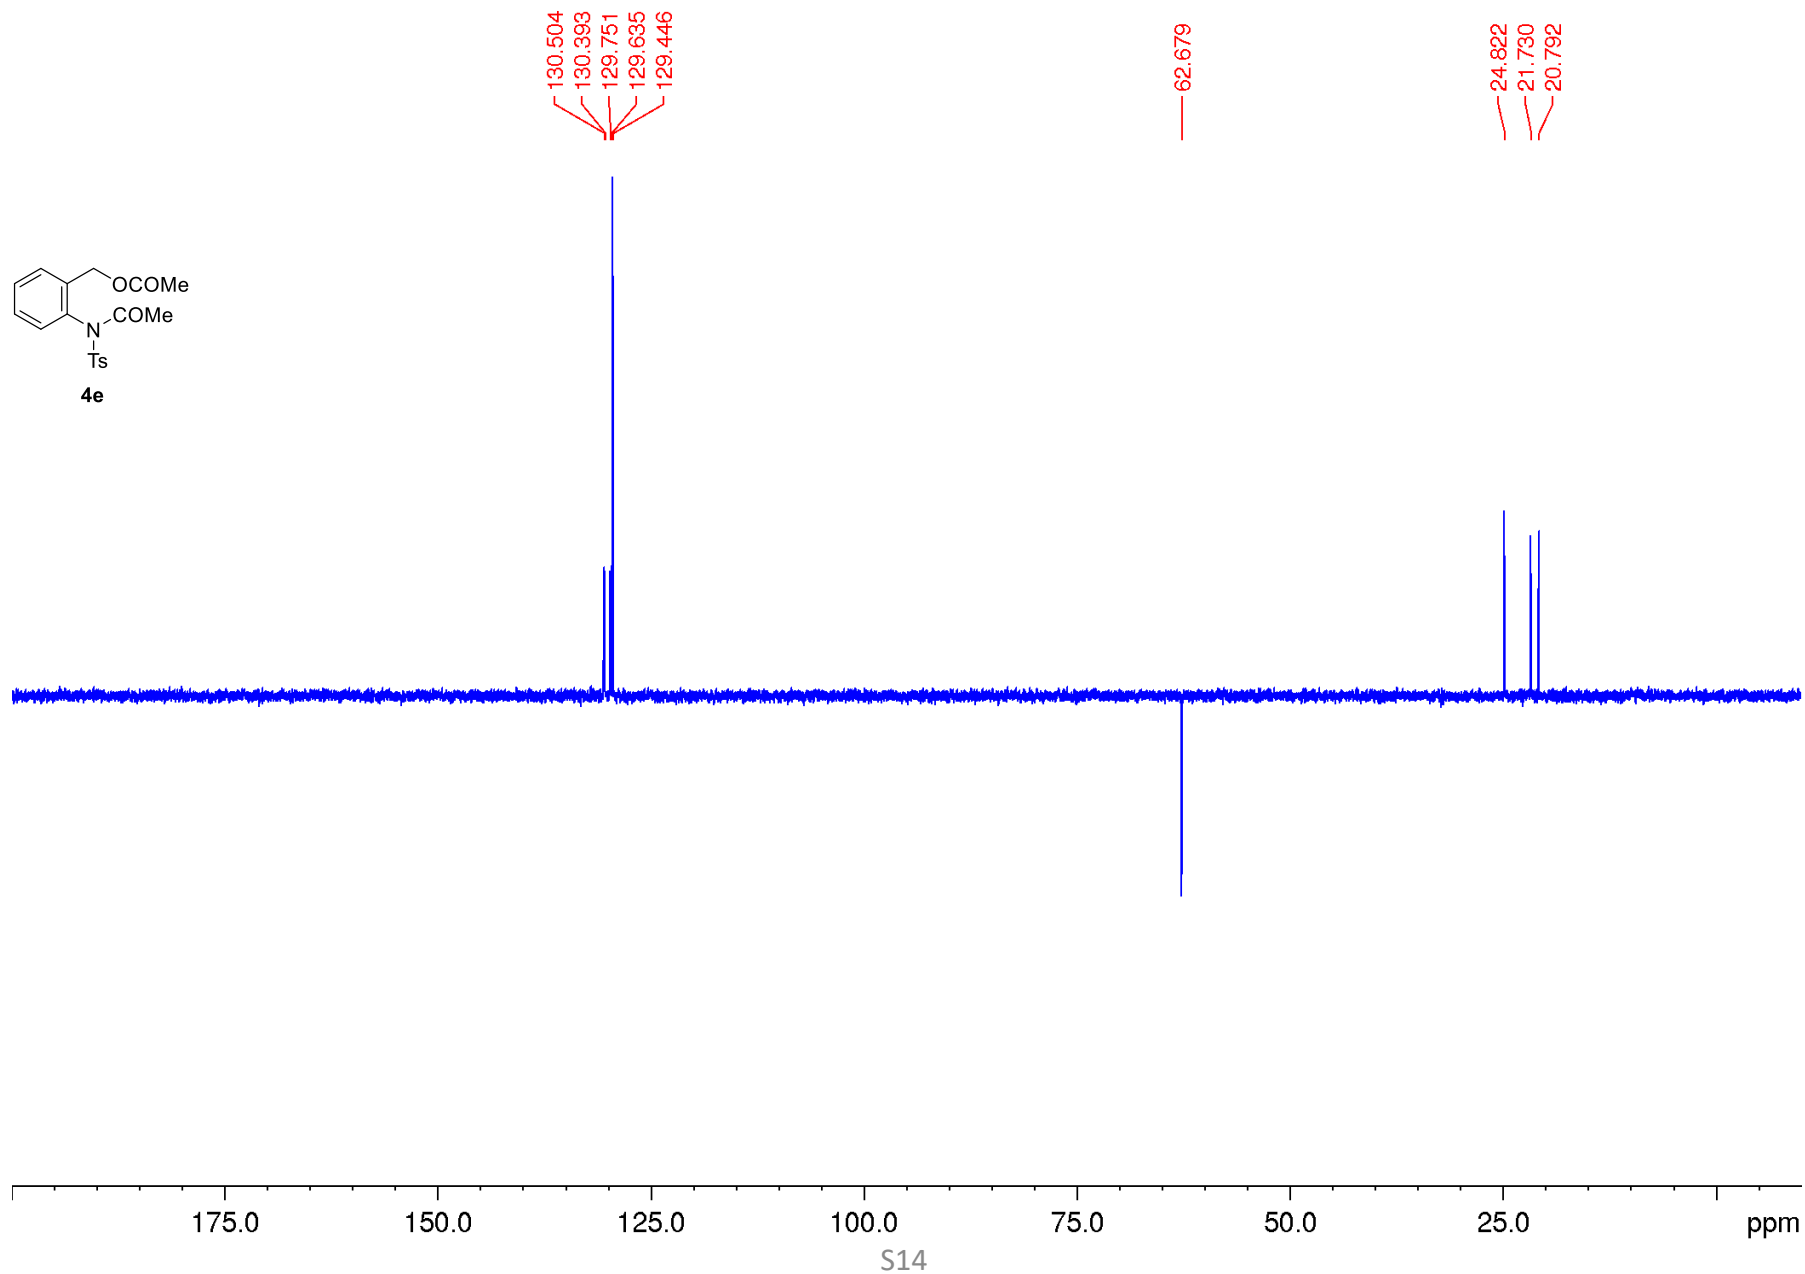

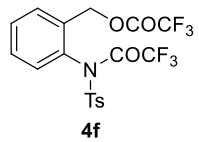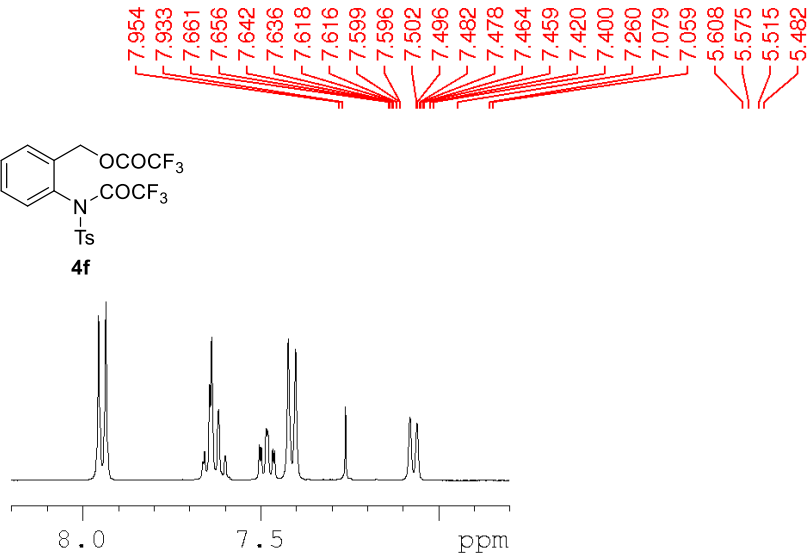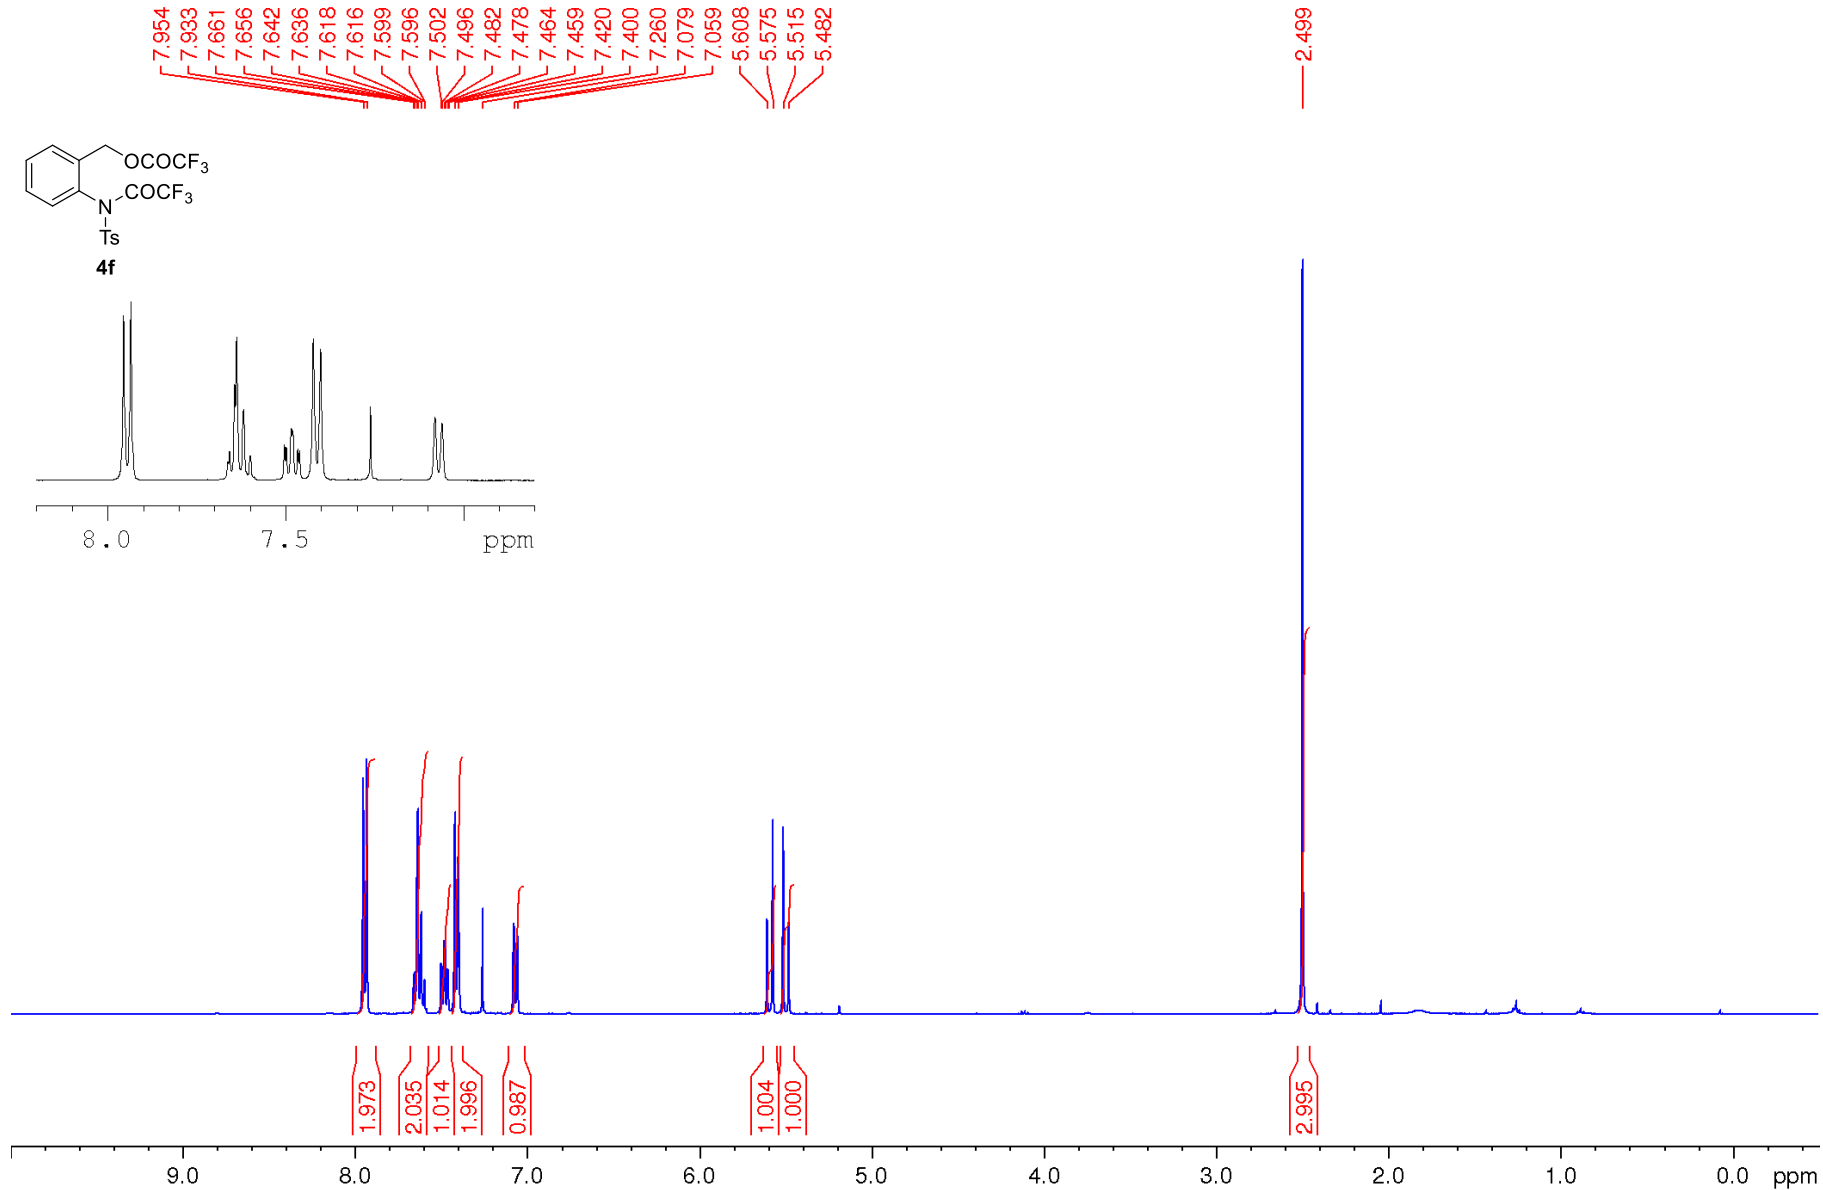

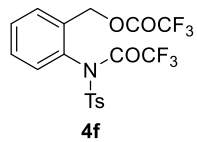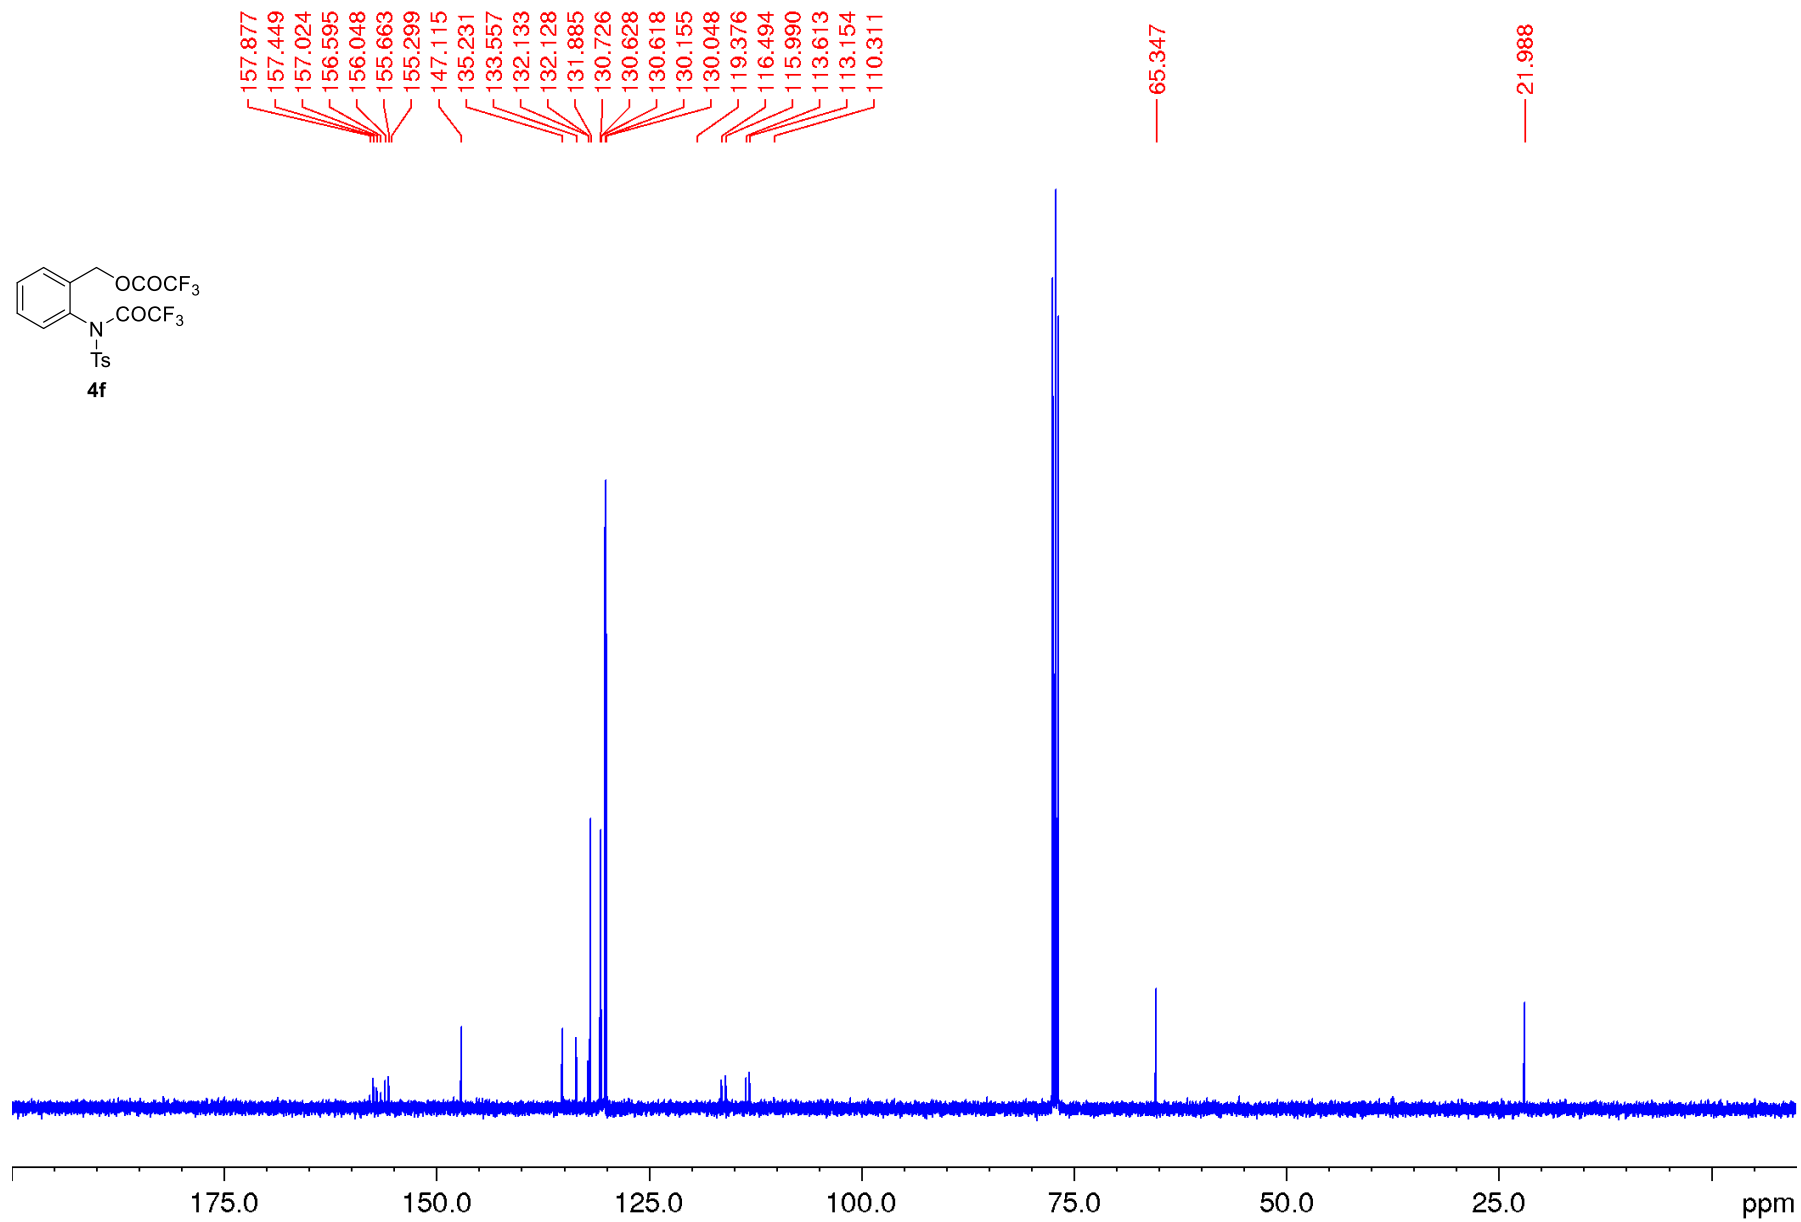

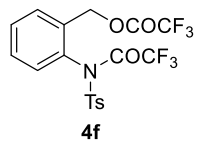

131.878  
130.724  
130.581  
130.162  
130.112  
130.036

65.344

21.957

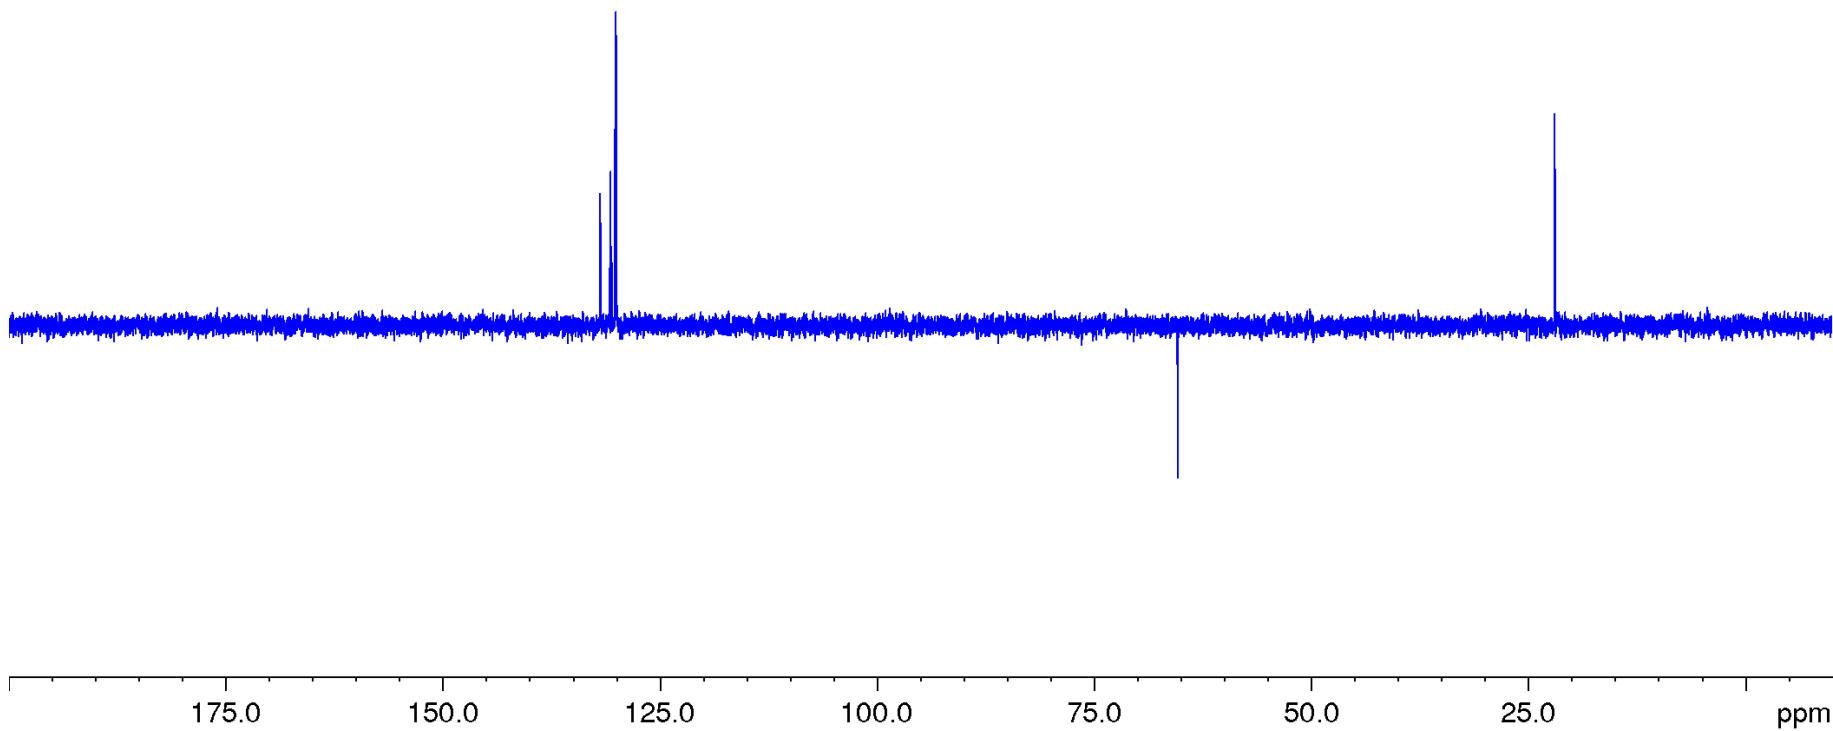

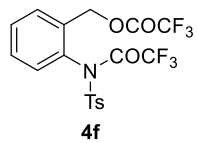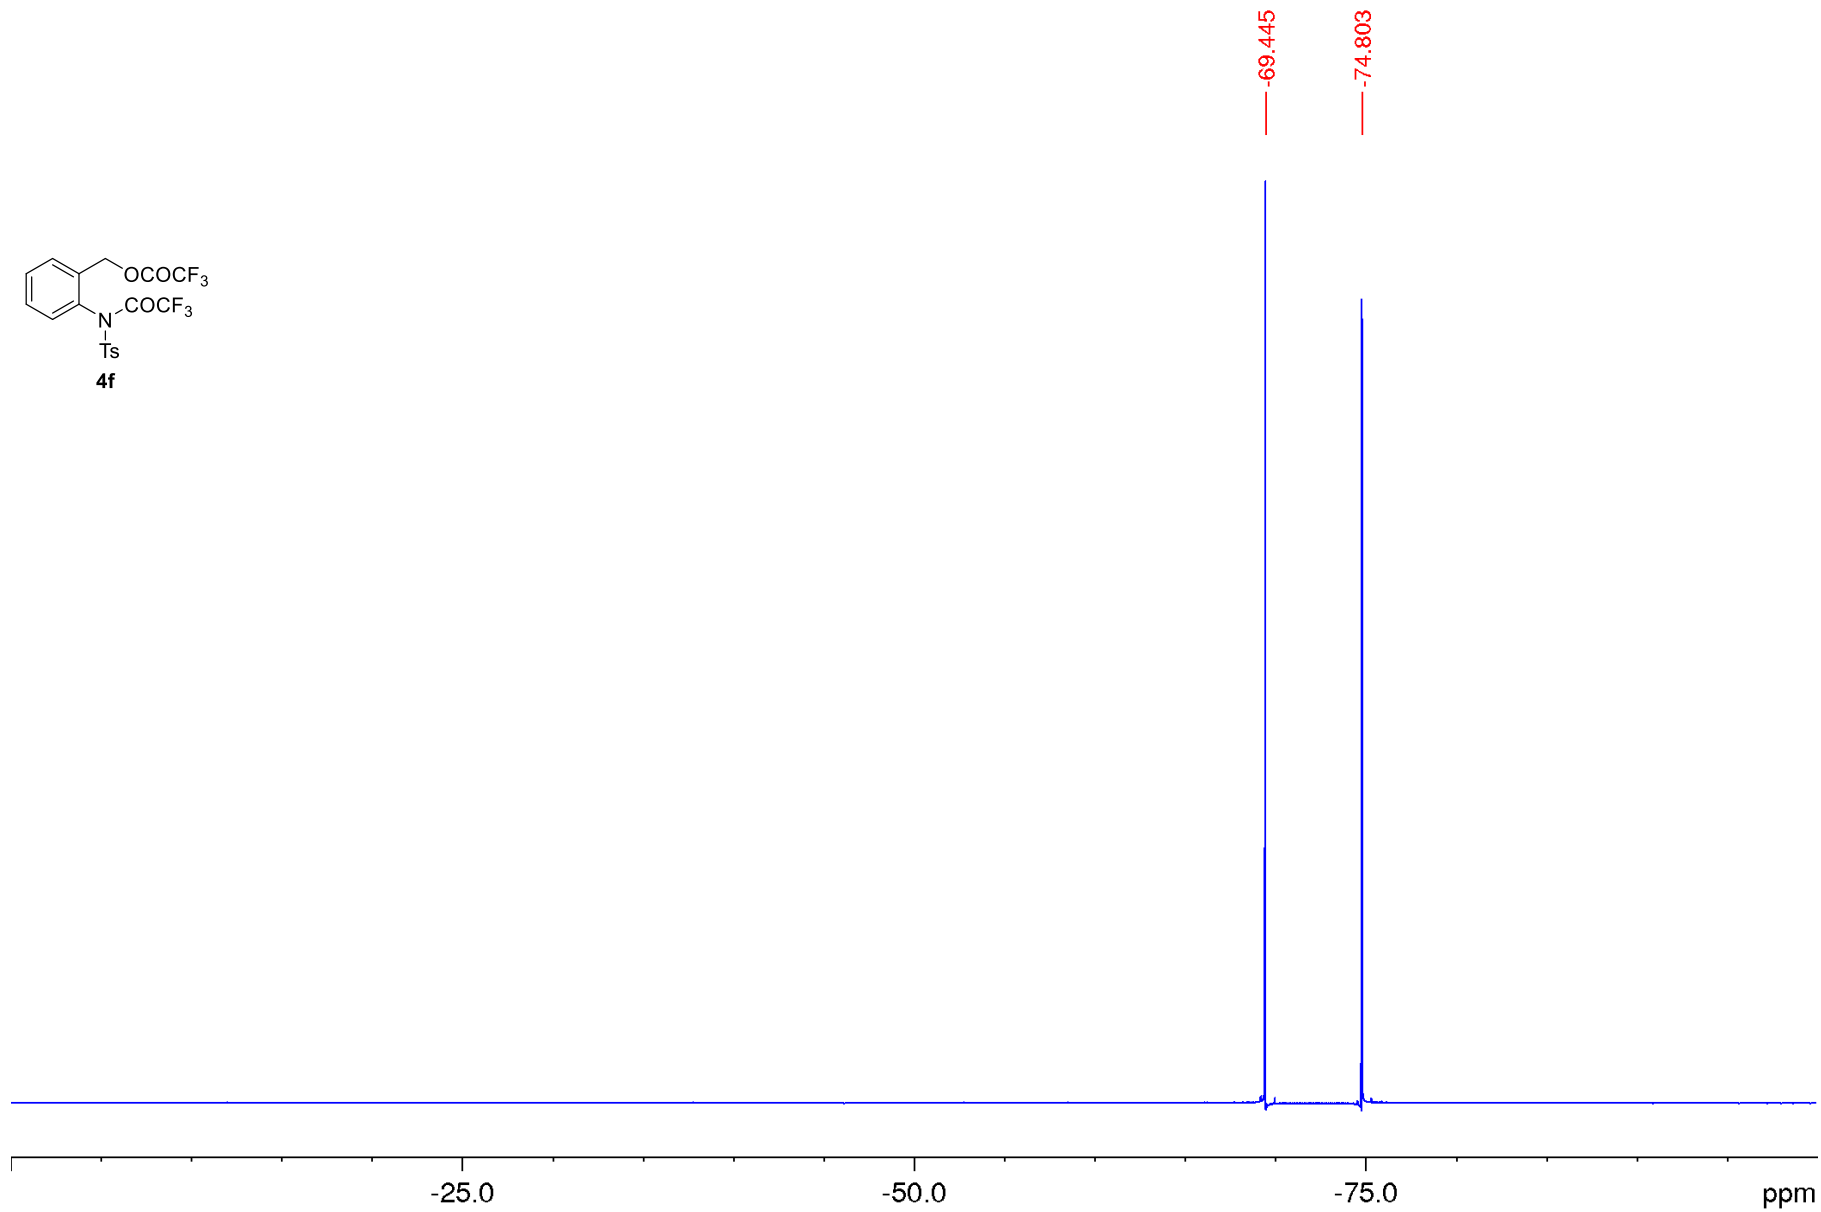

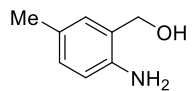

4g

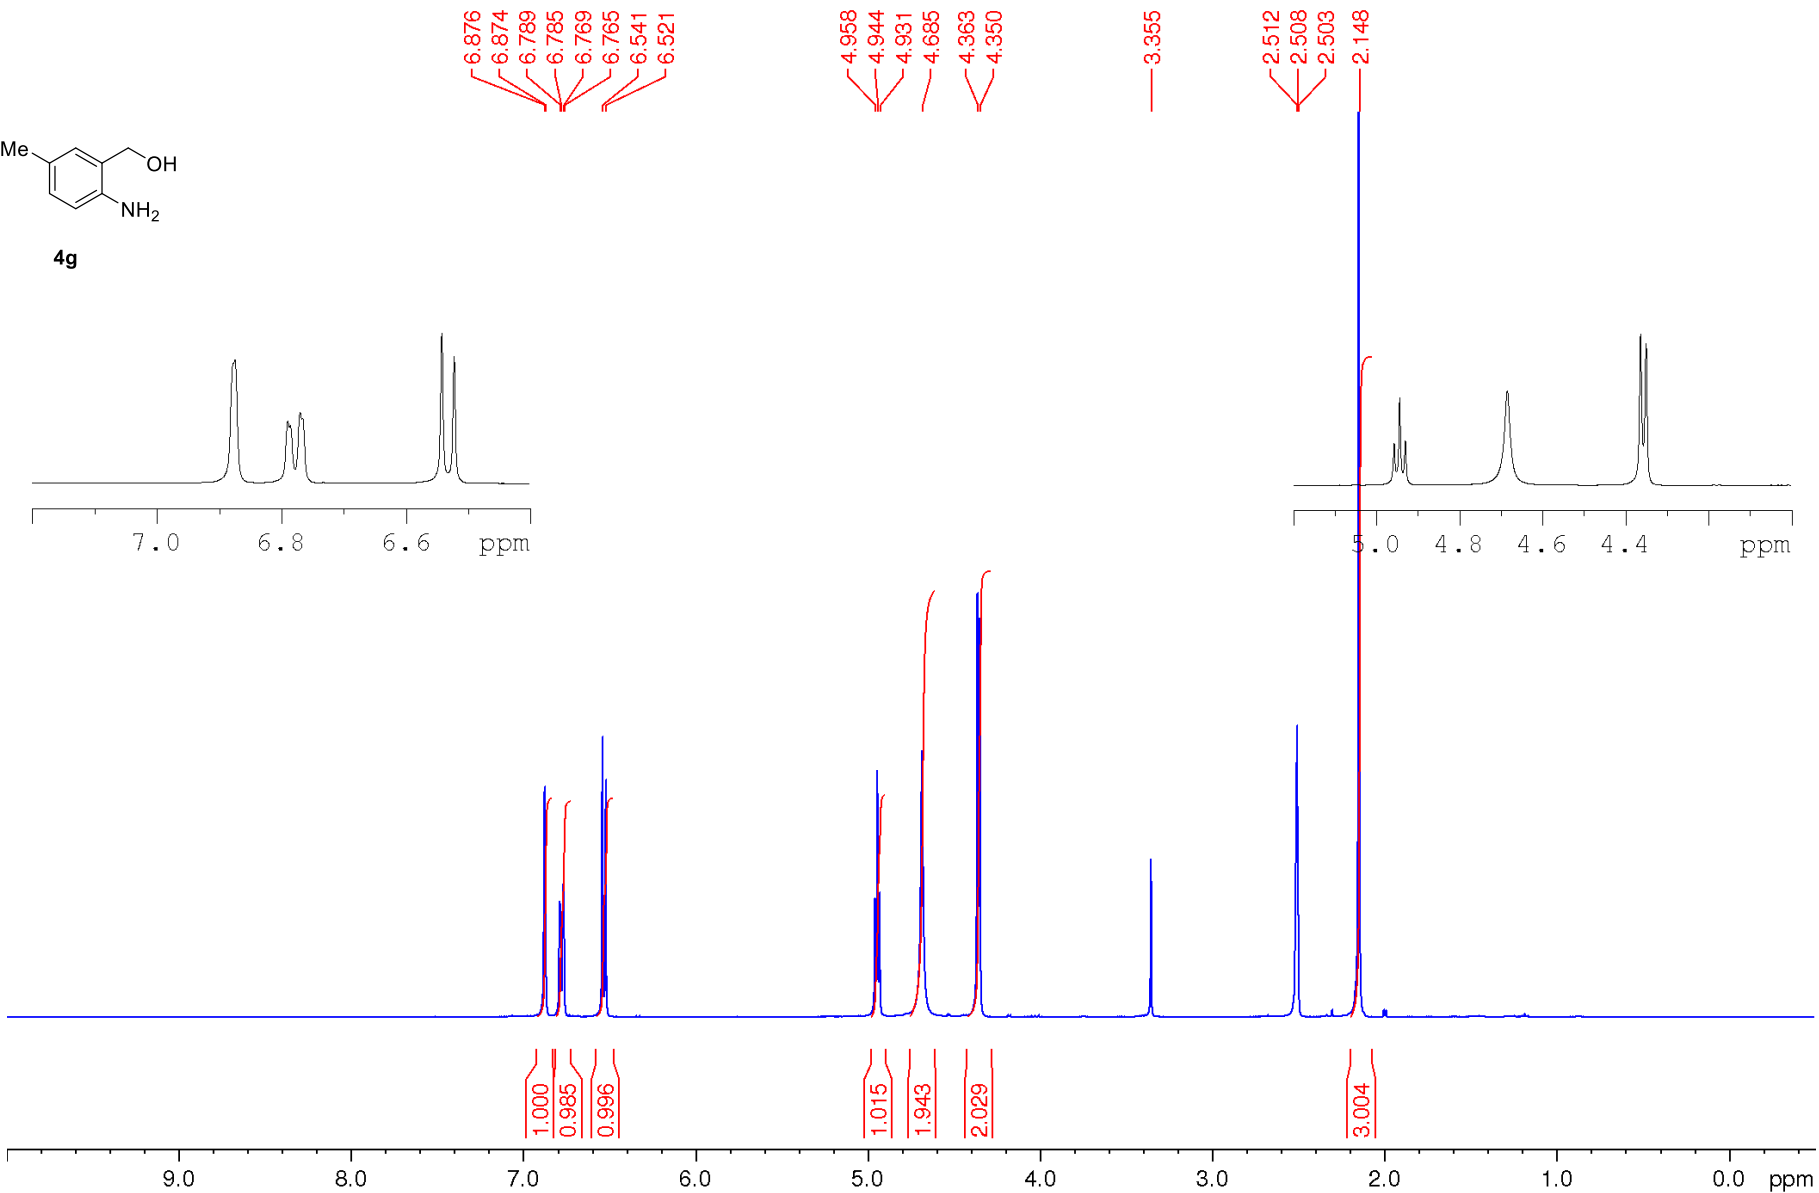

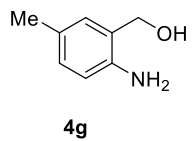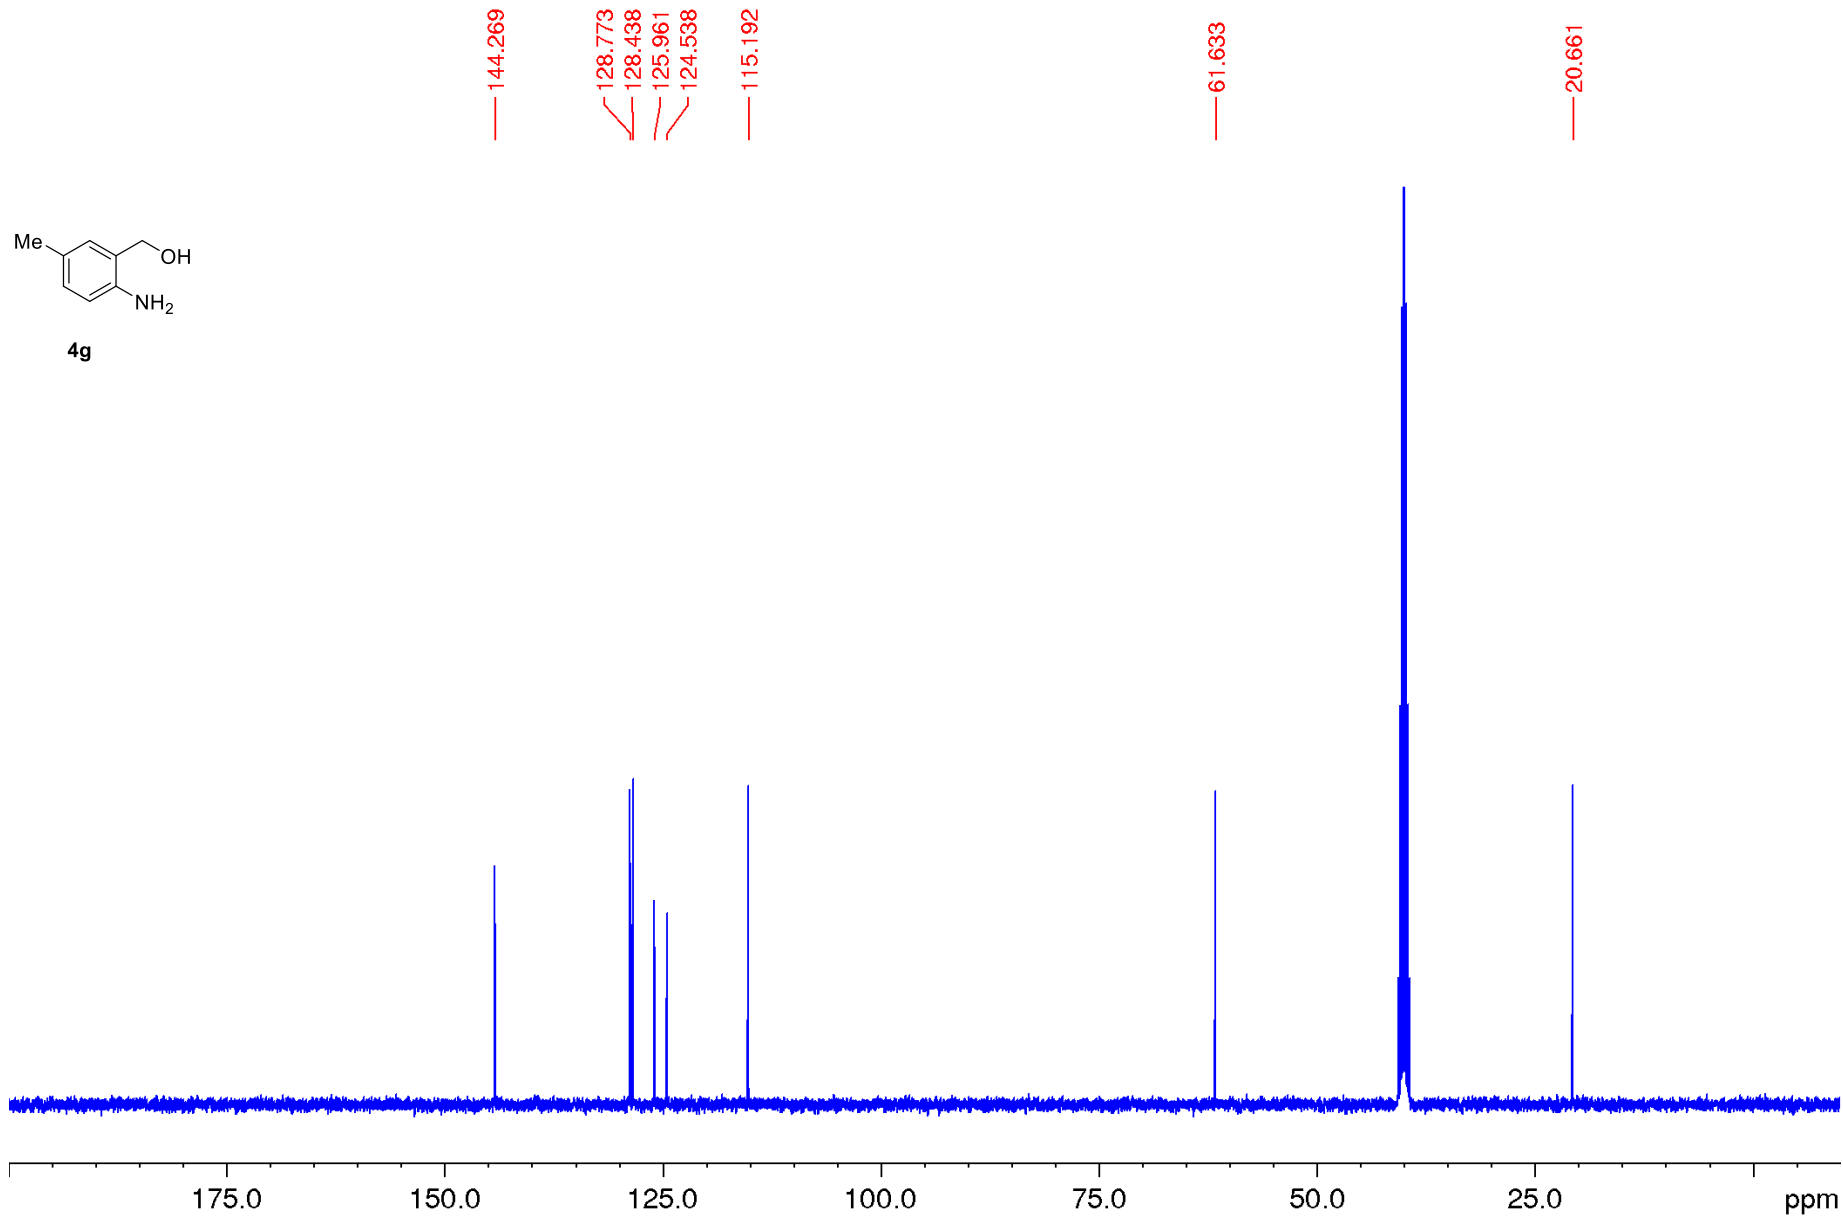



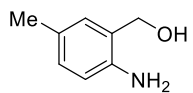

4g

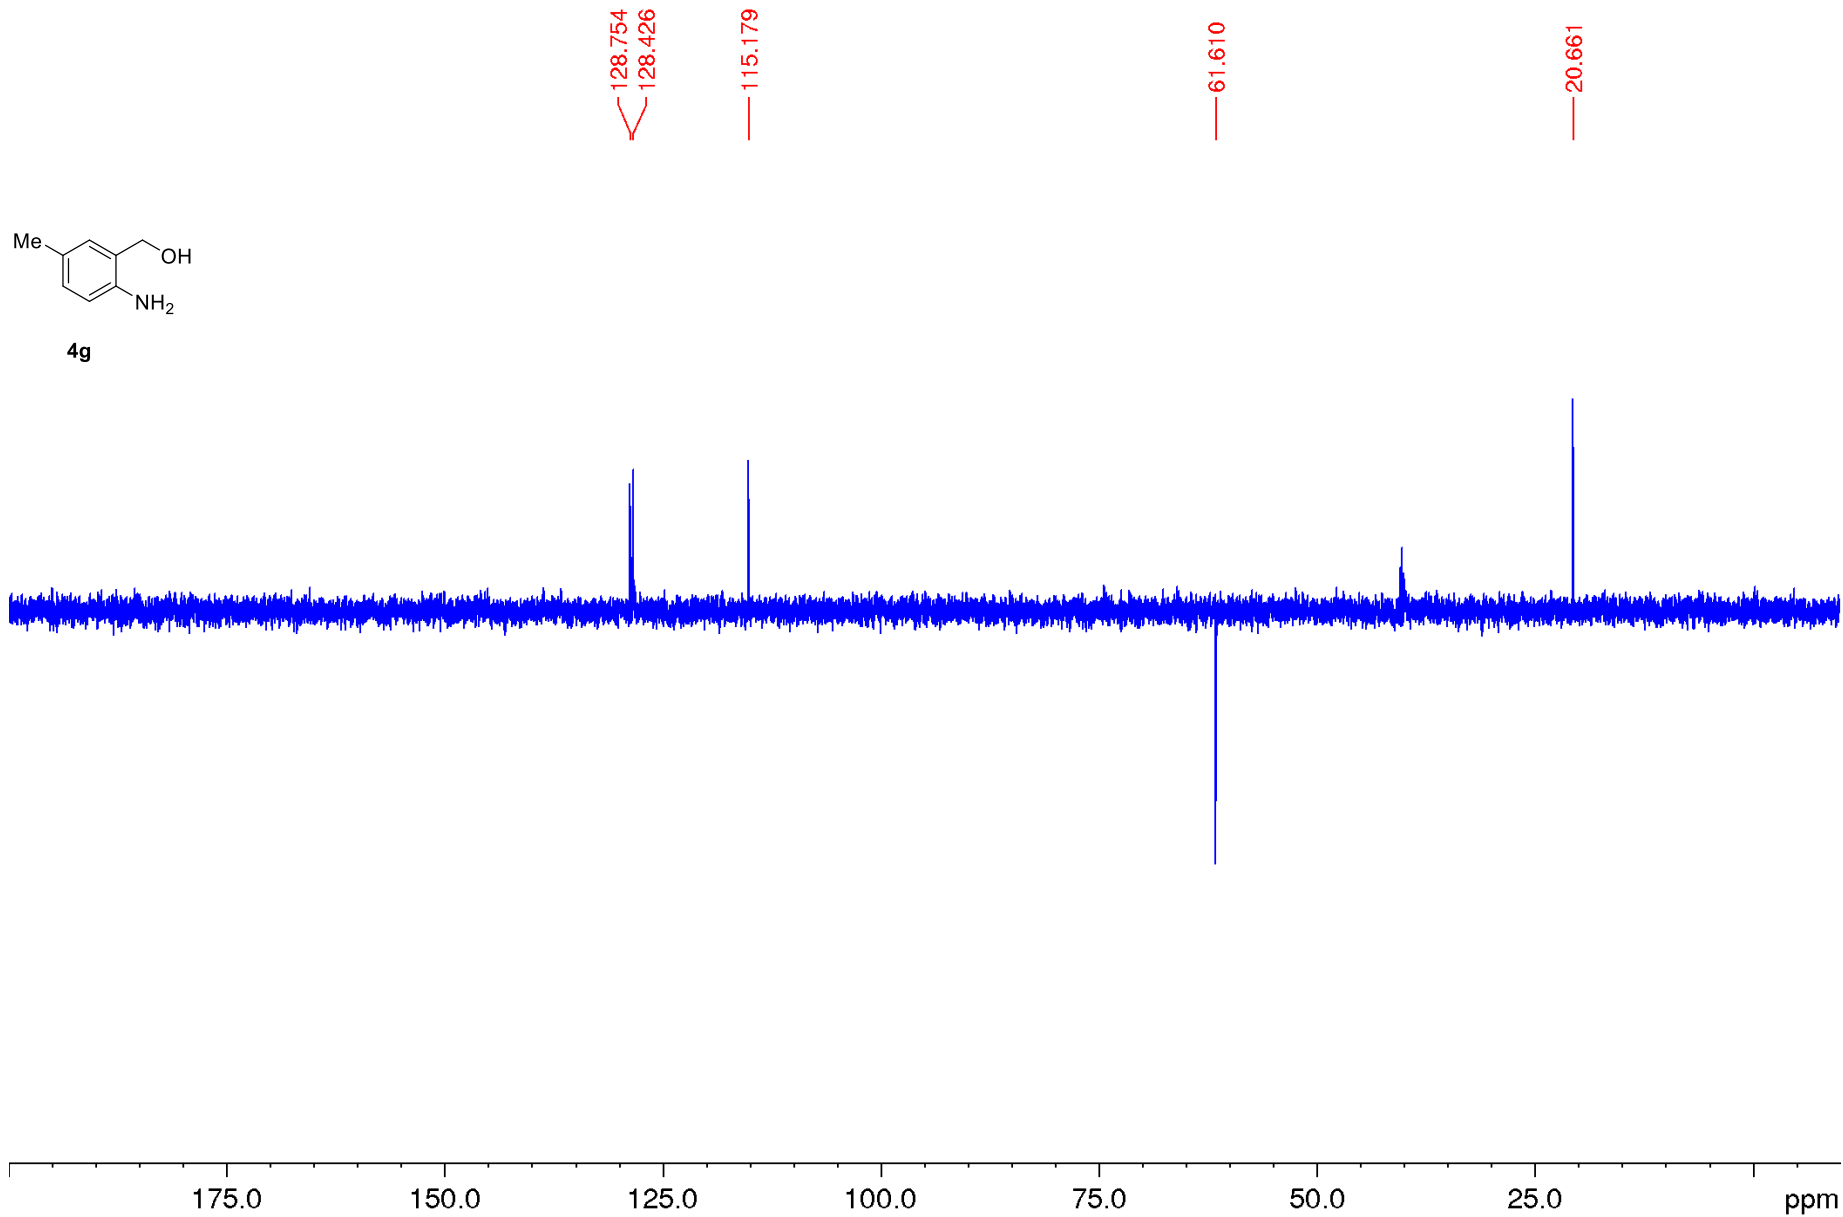

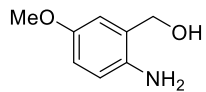

4h

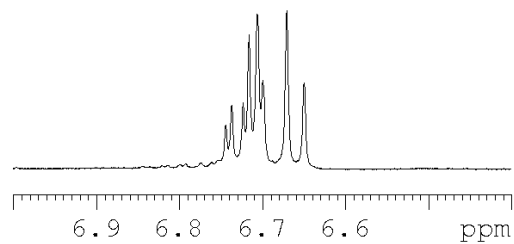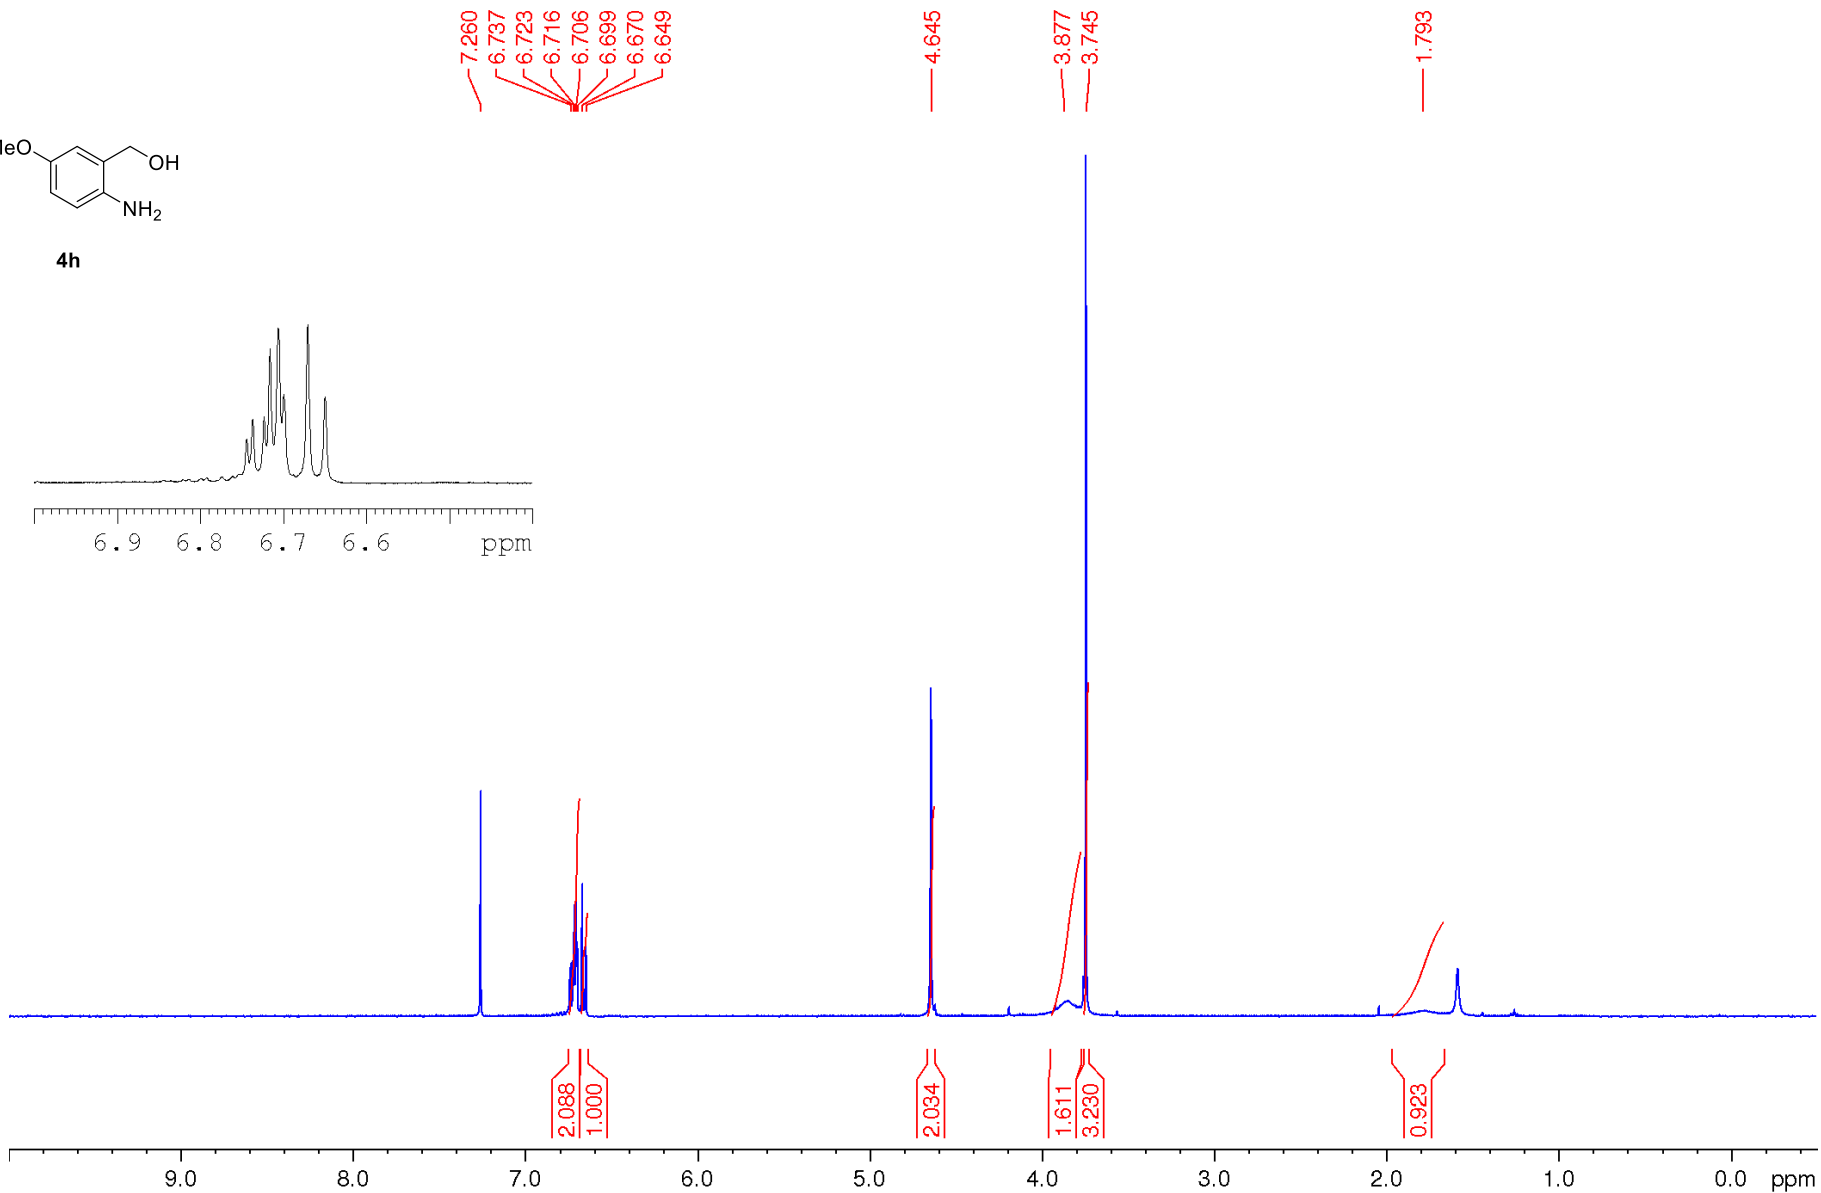

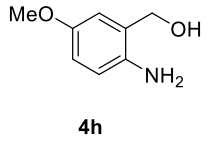

152.715  
139.533  
126.656  
117.583  
115.159  
114.765  
64.496  
56.040

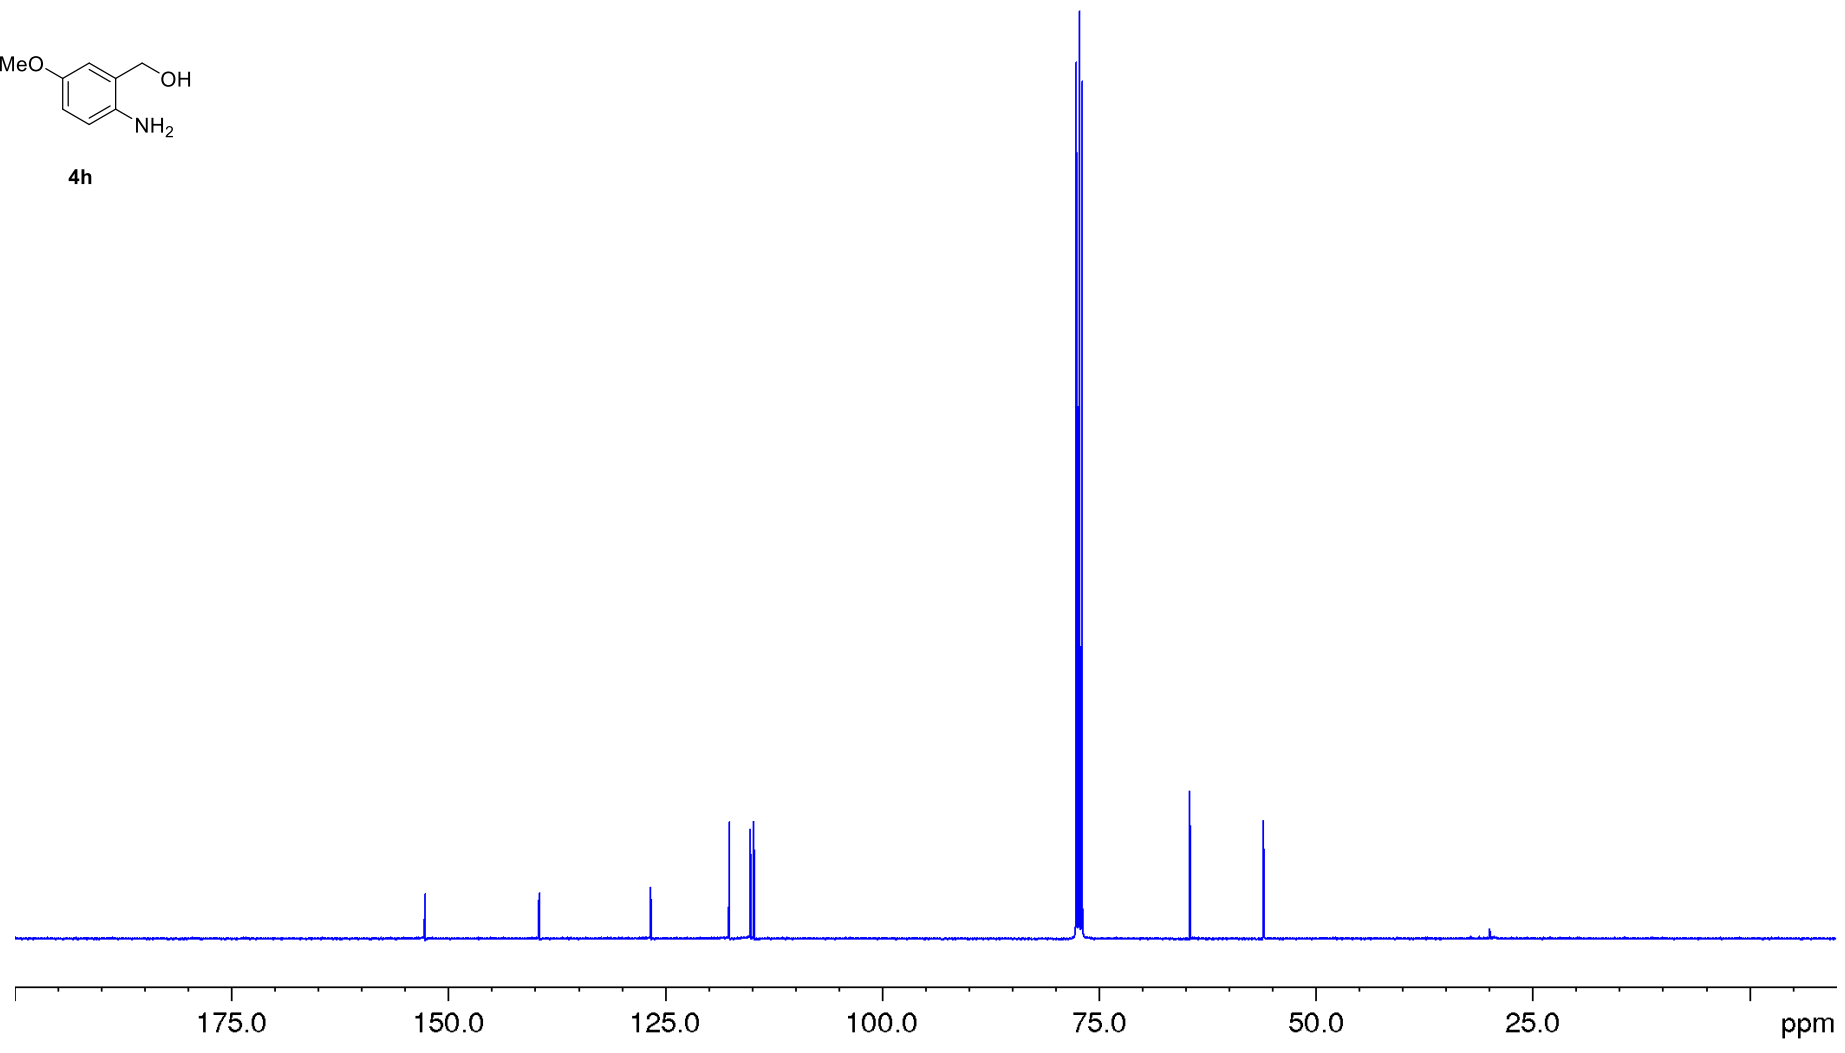

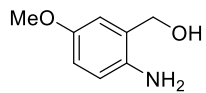

4h

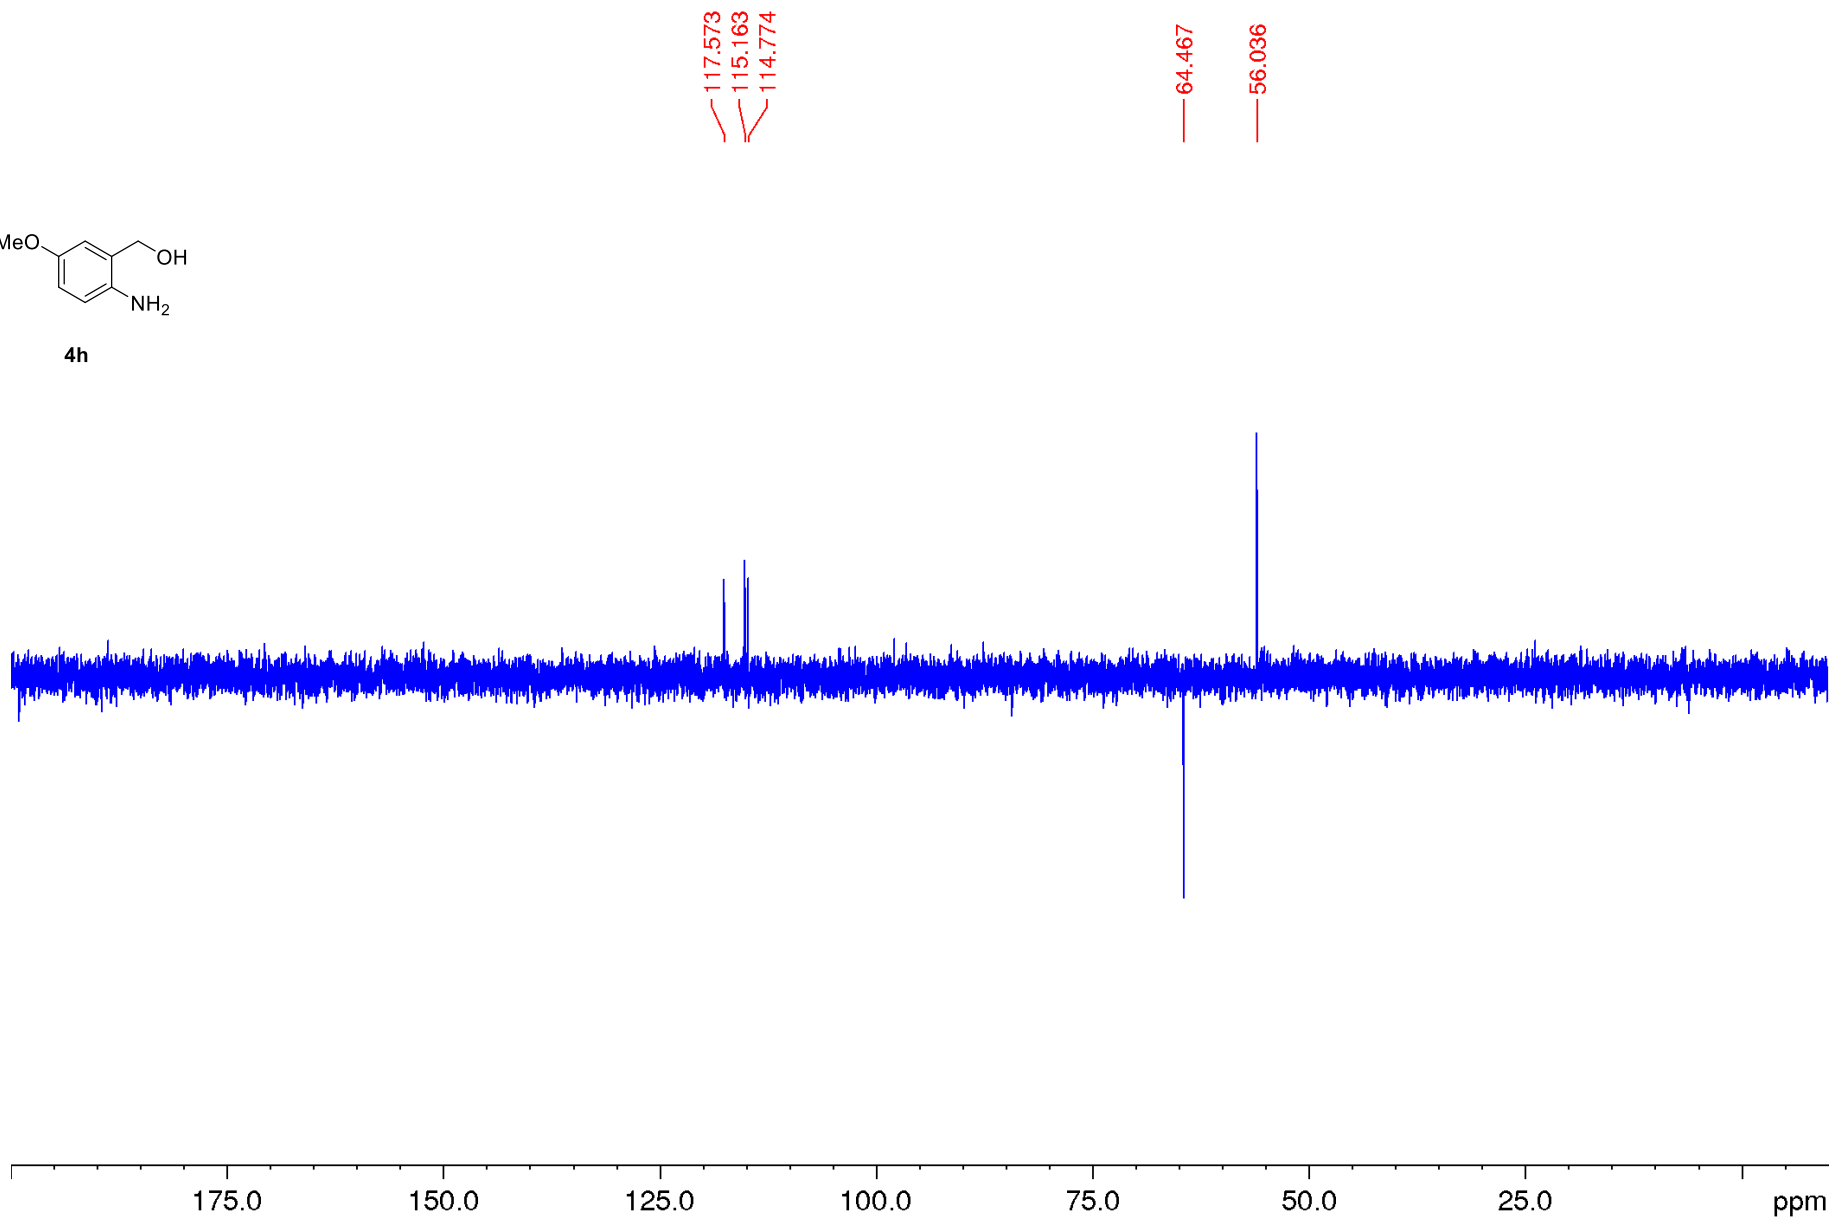

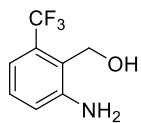

4i

7.259  
7.206  
7.187  
7.167  
7.049  
7.030  
6.885  
6.865

4.800  
4.789  
4.413

1.734  
1.720  
1.705

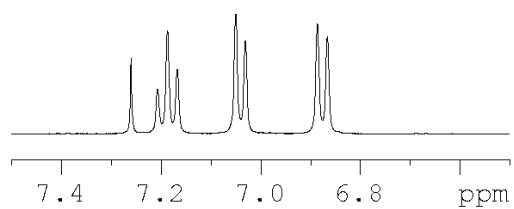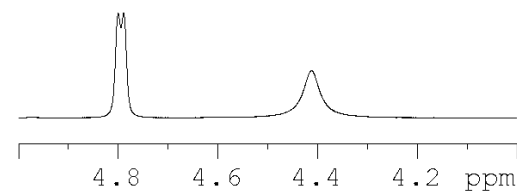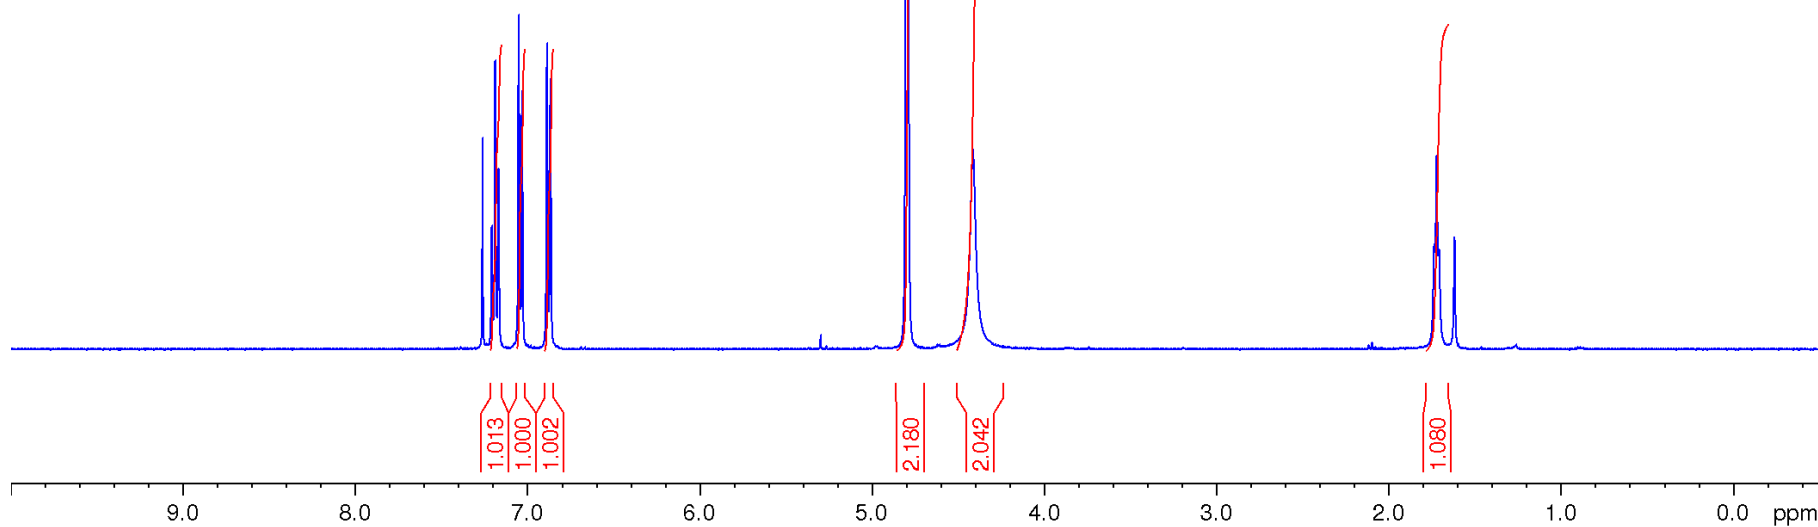

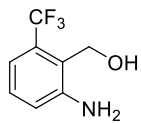

4i

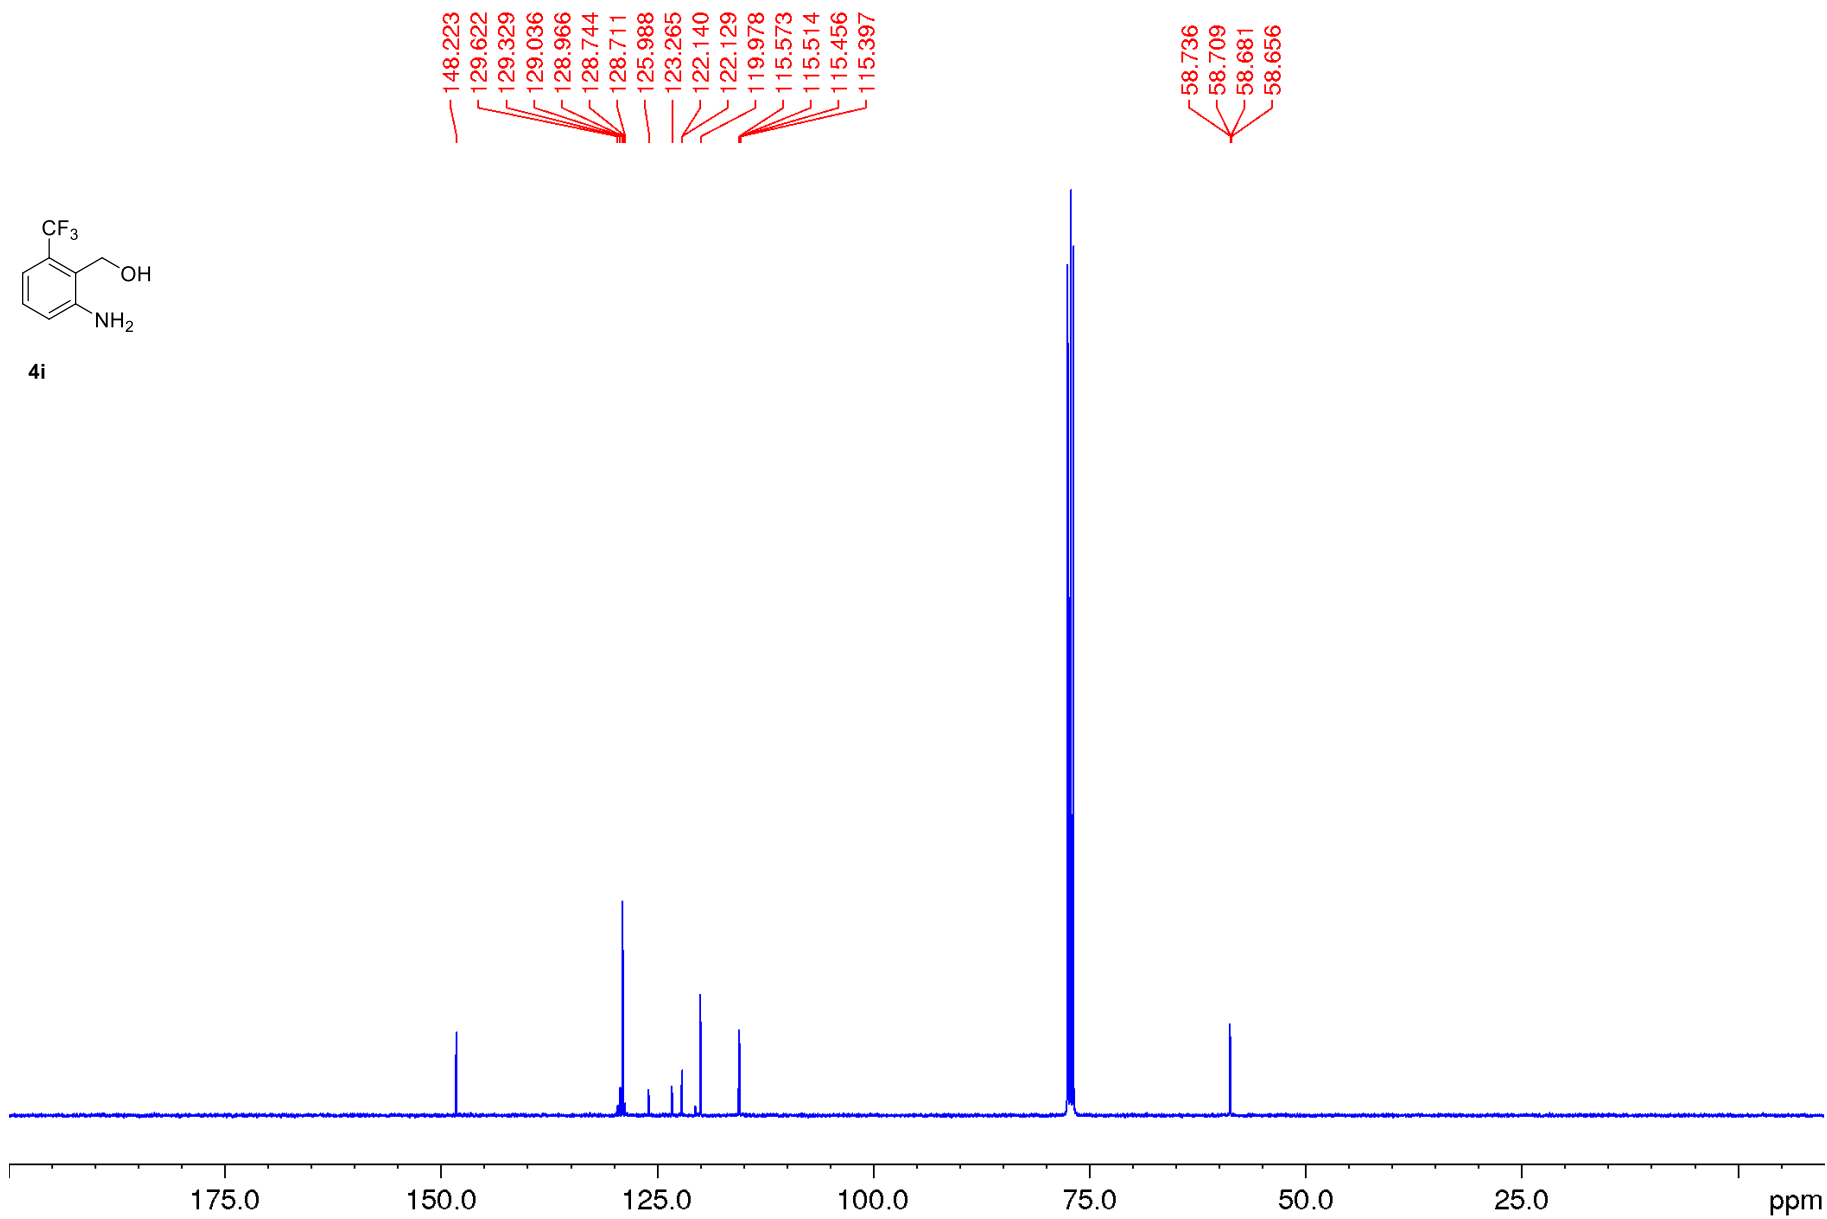

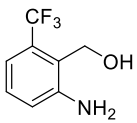

4i

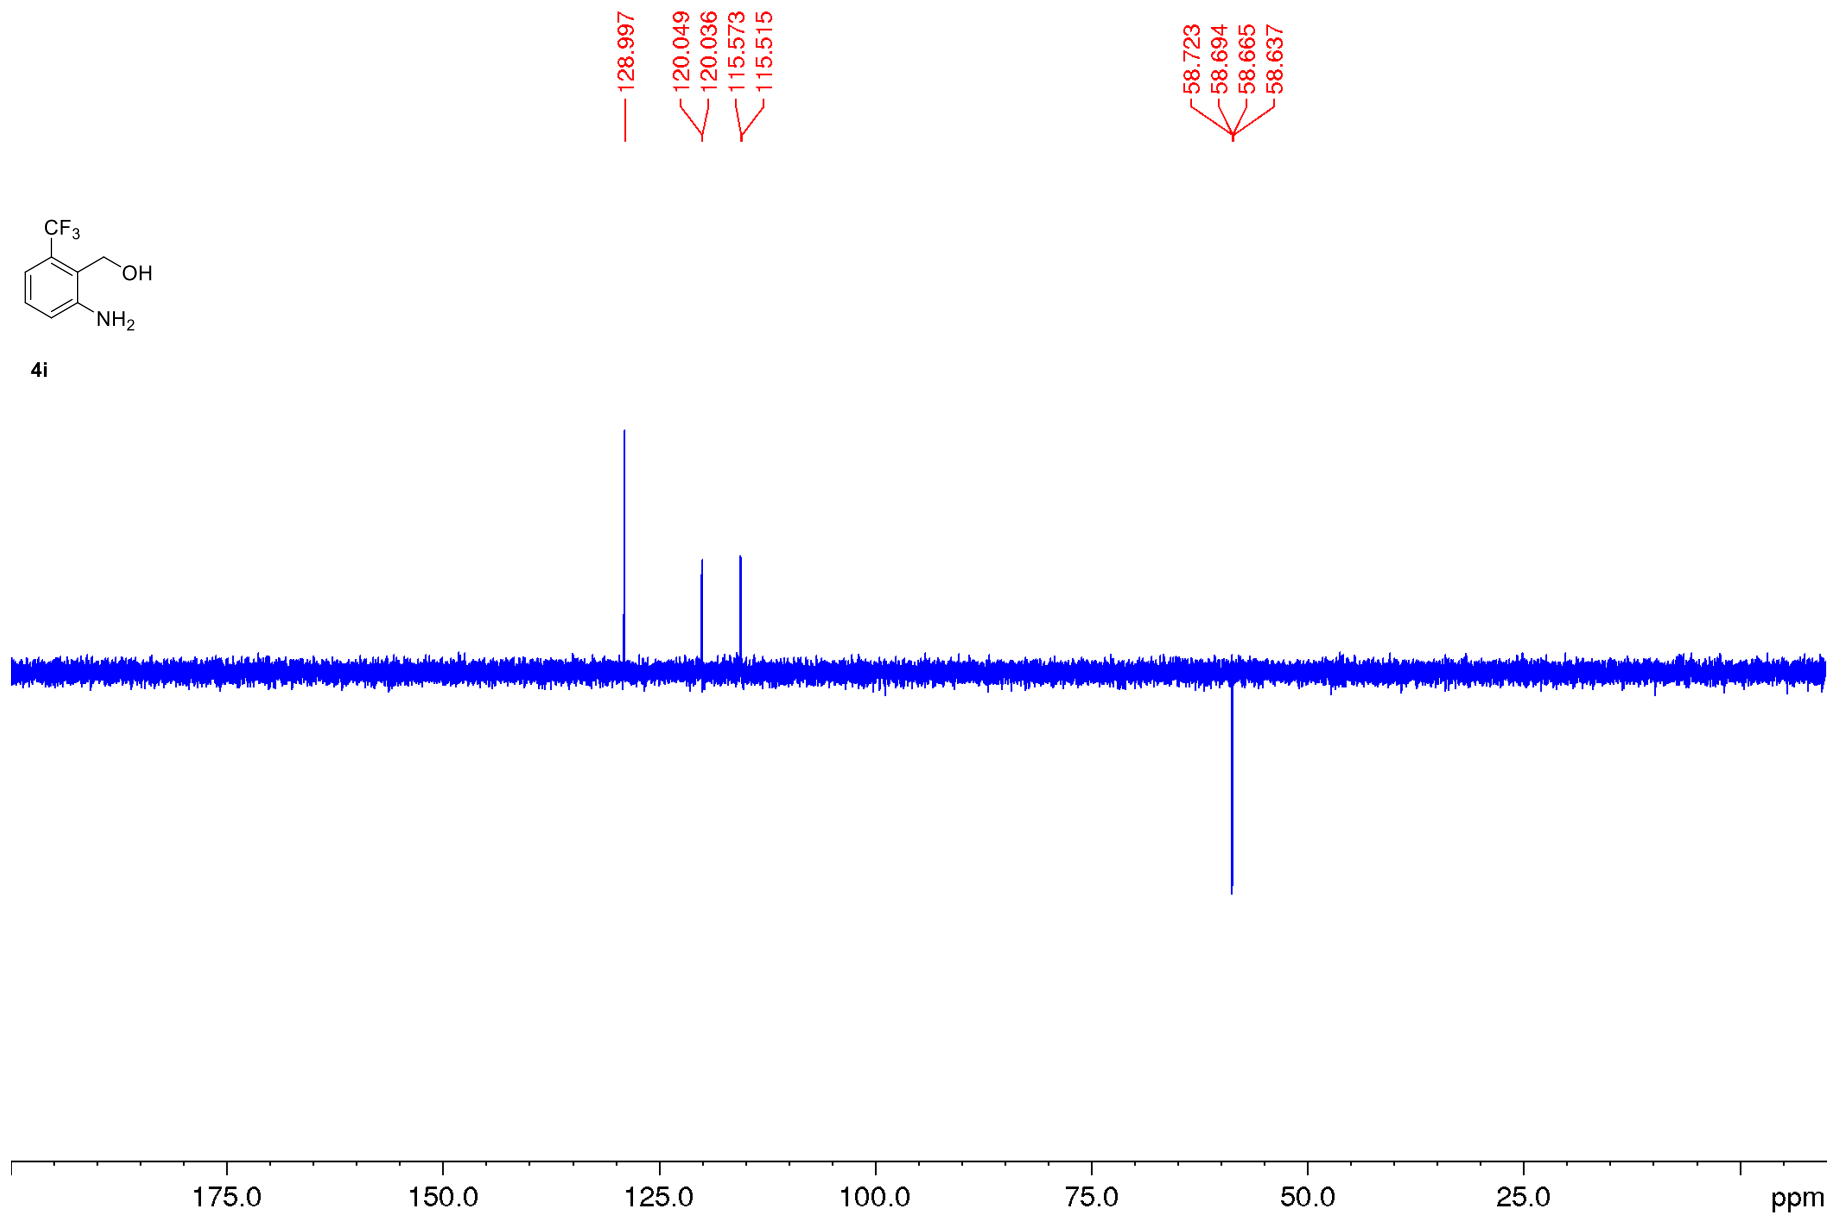



4i

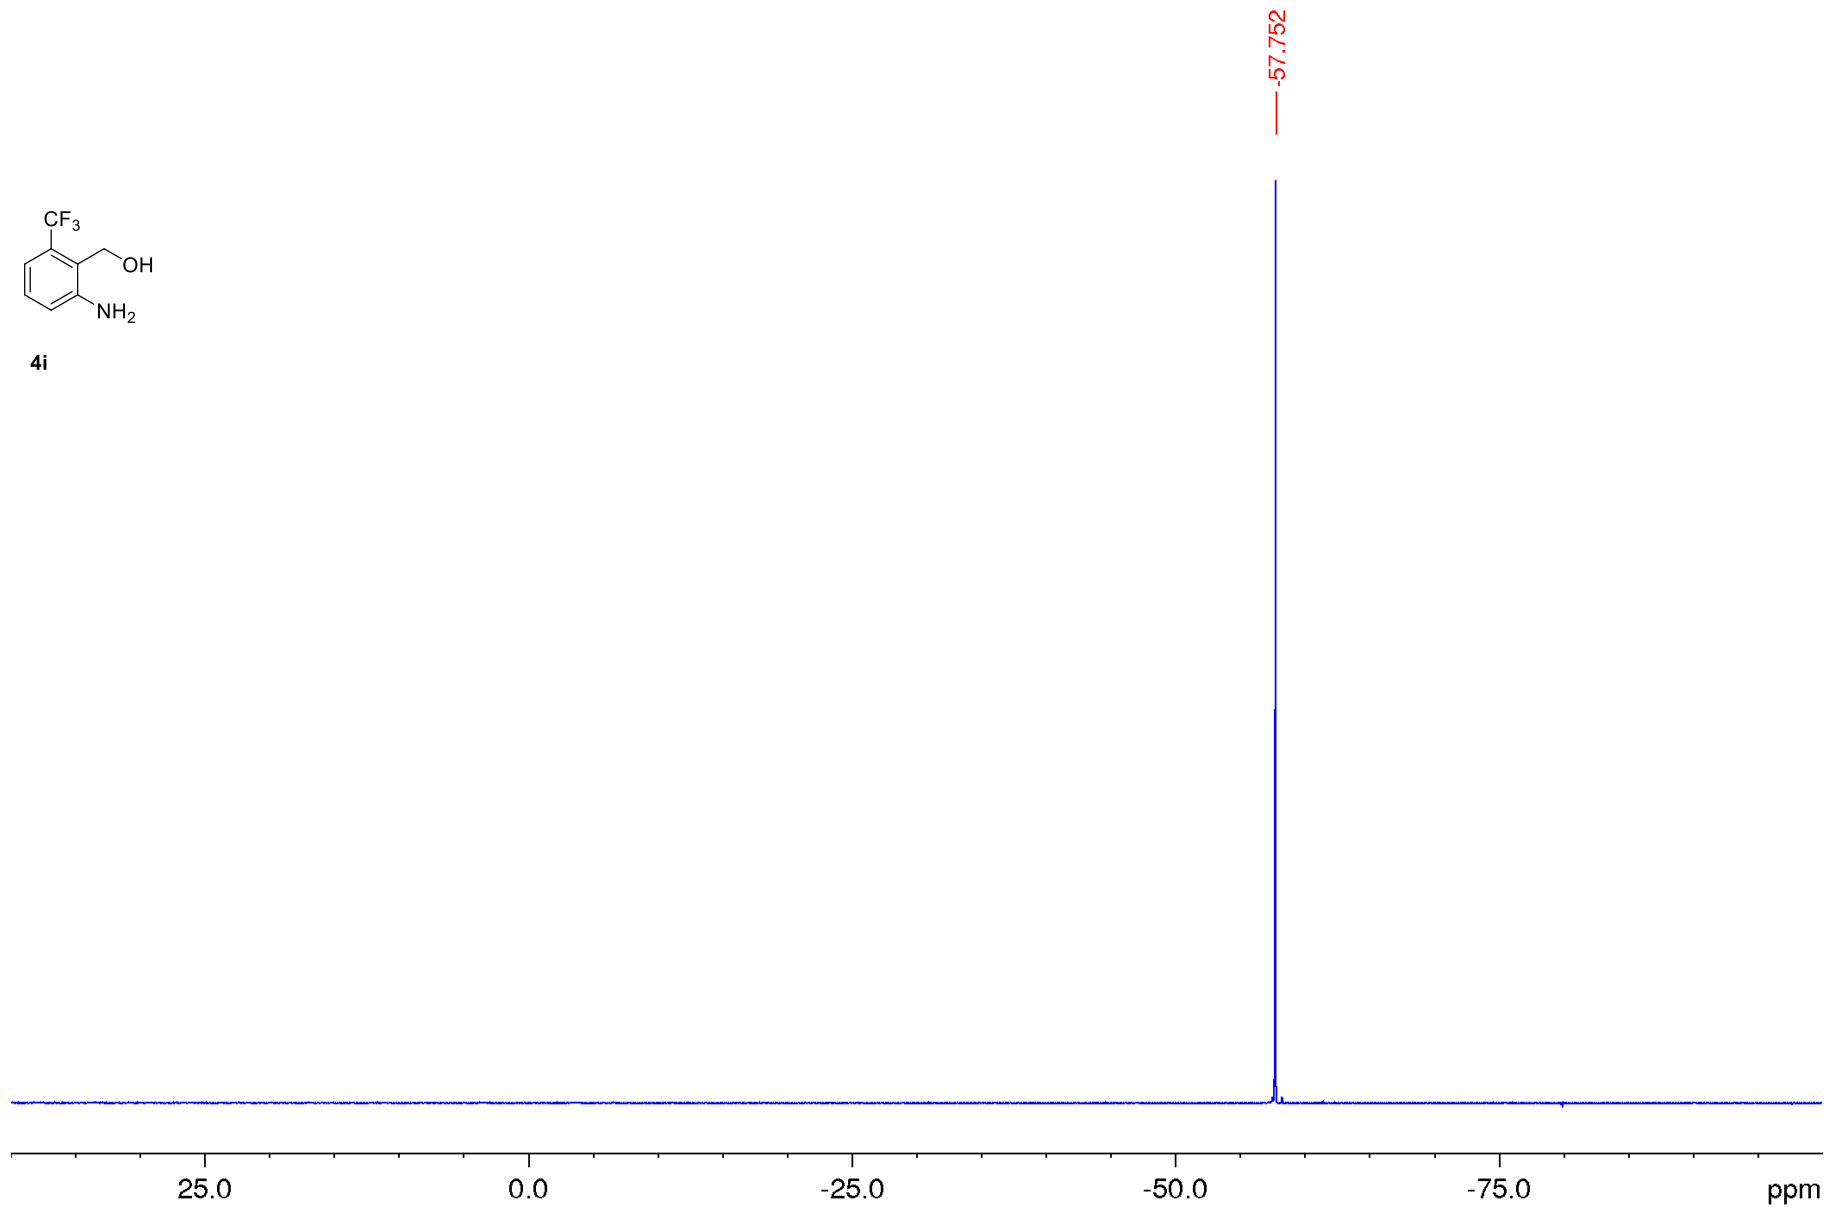



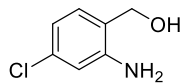

4j

7.067  
7.047  
6.656  
6.650  
6.532  
6.527  
6.512  
6.507  
5.205  
5.071  
5.057  
5.044  
4.355  
4.341

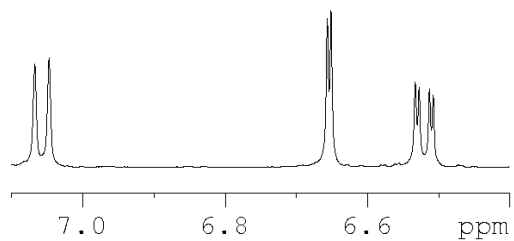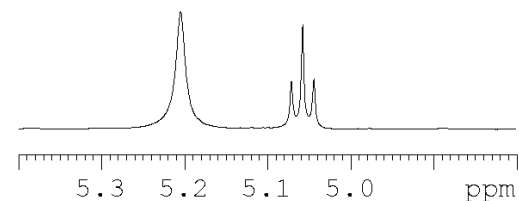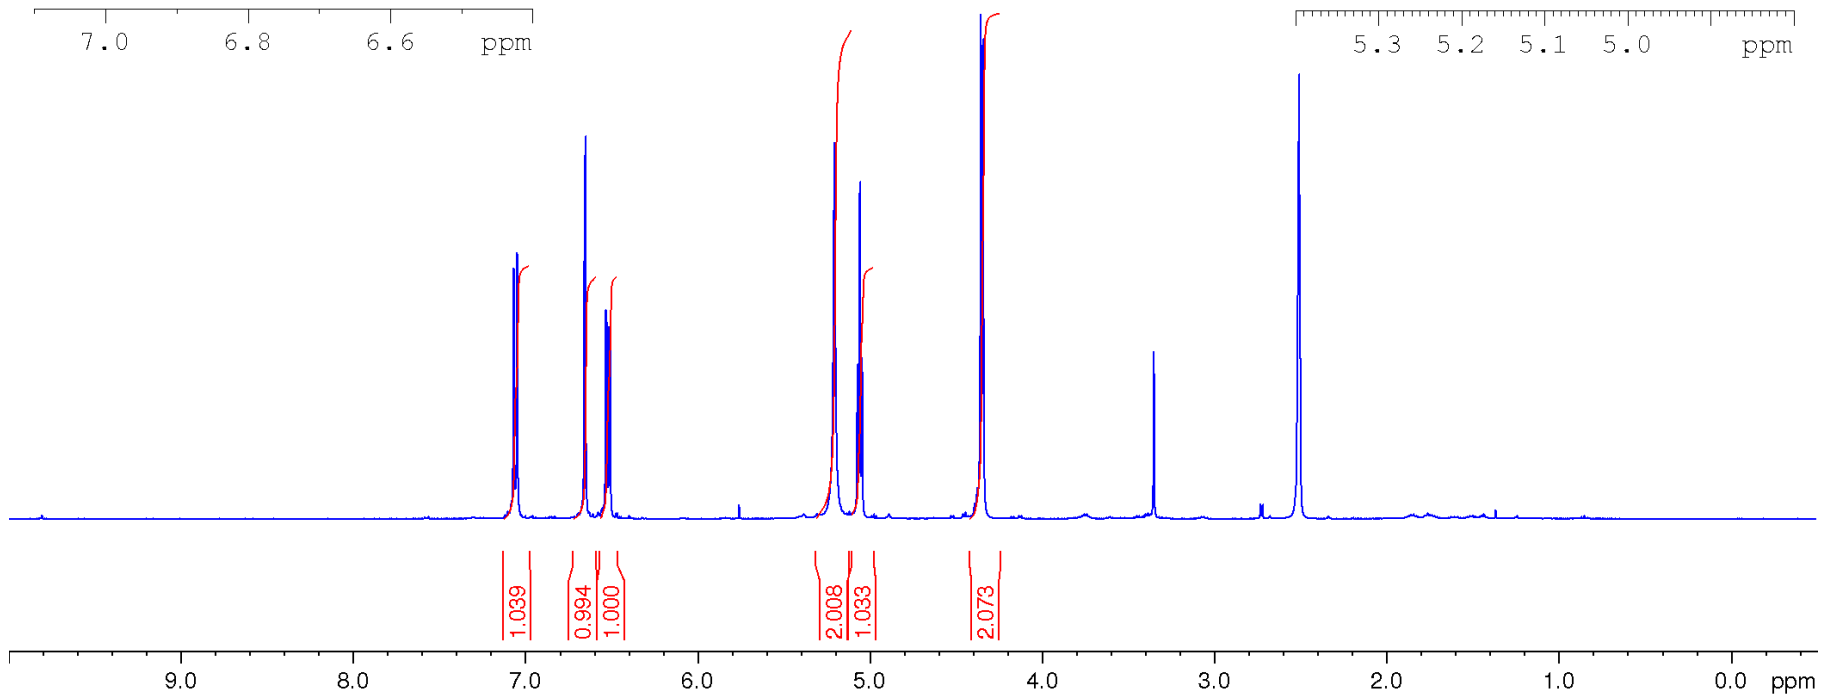

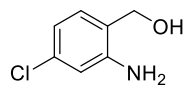

4j

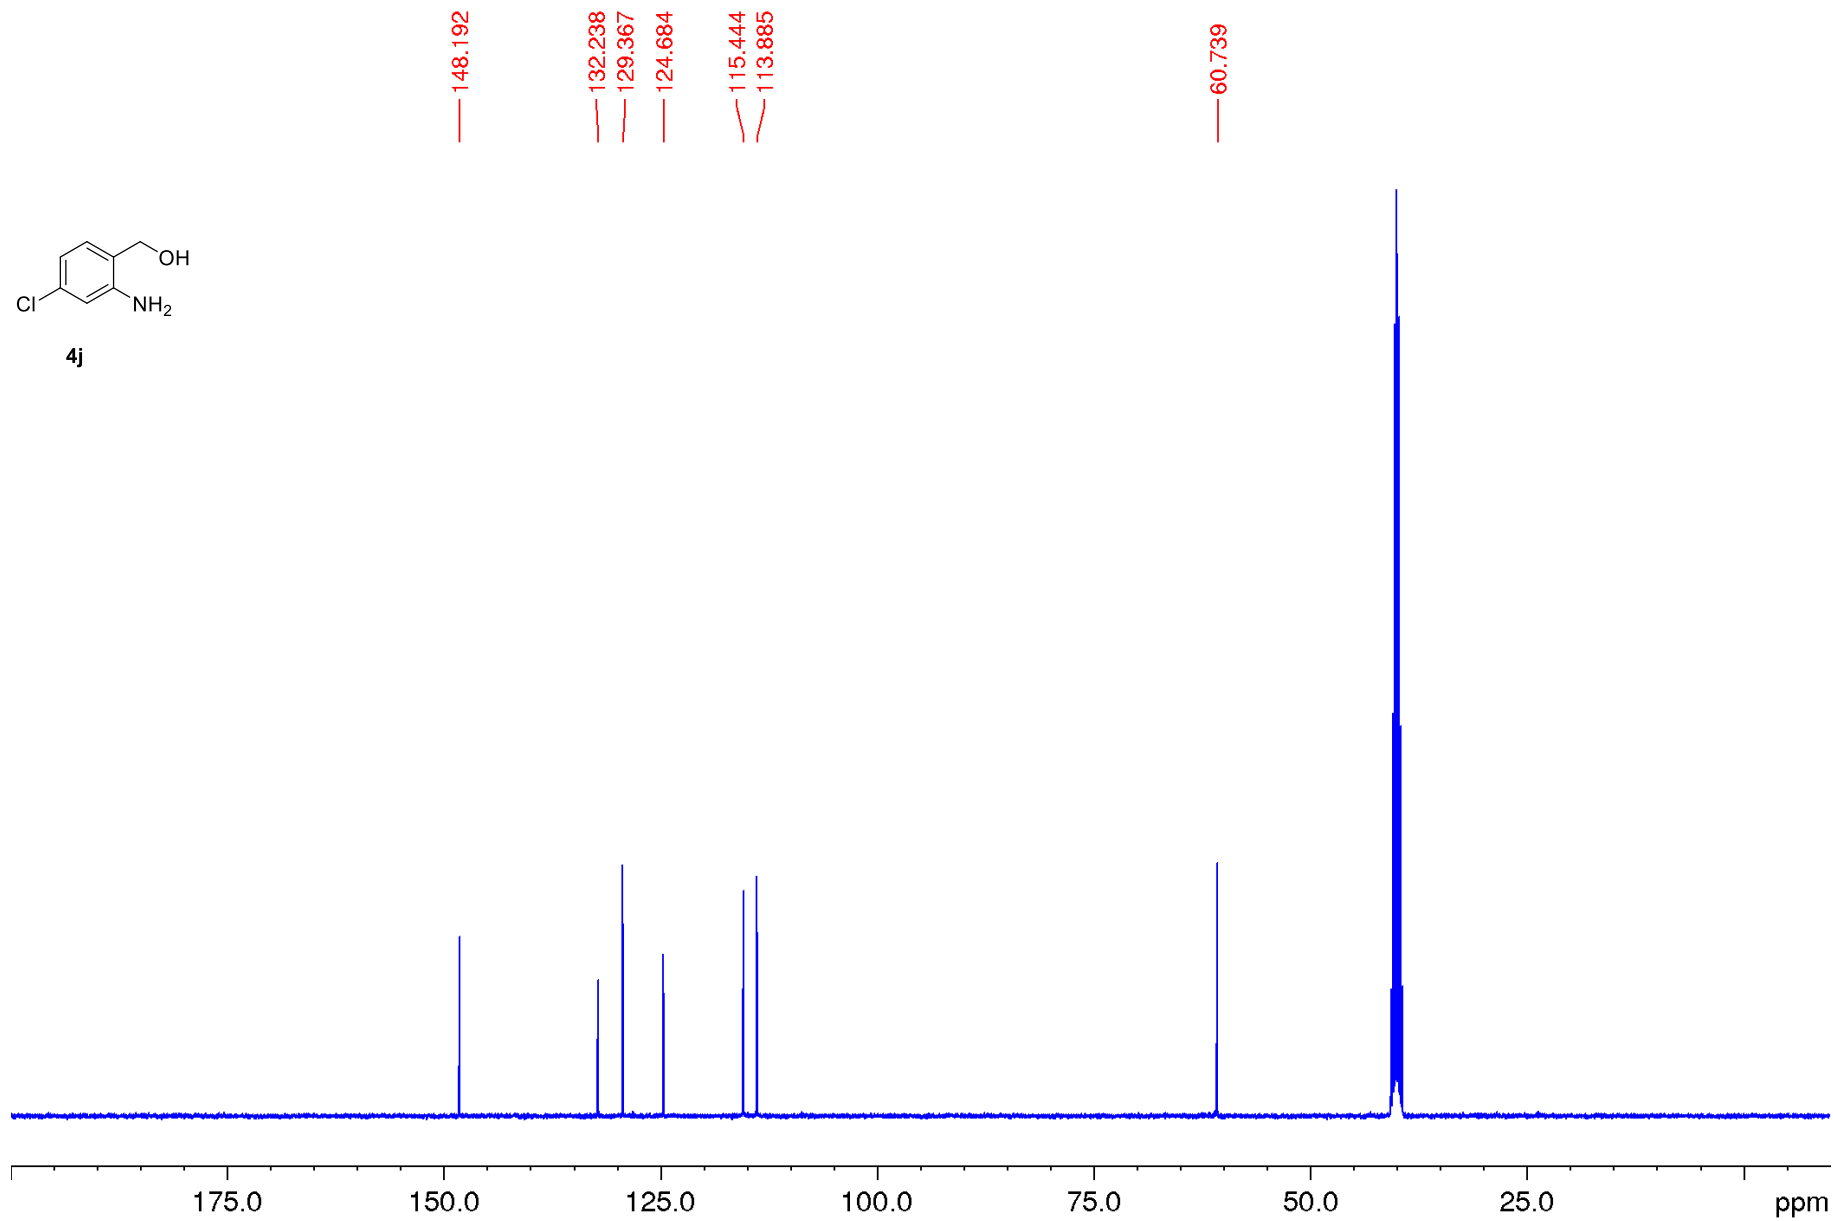

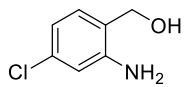

4j

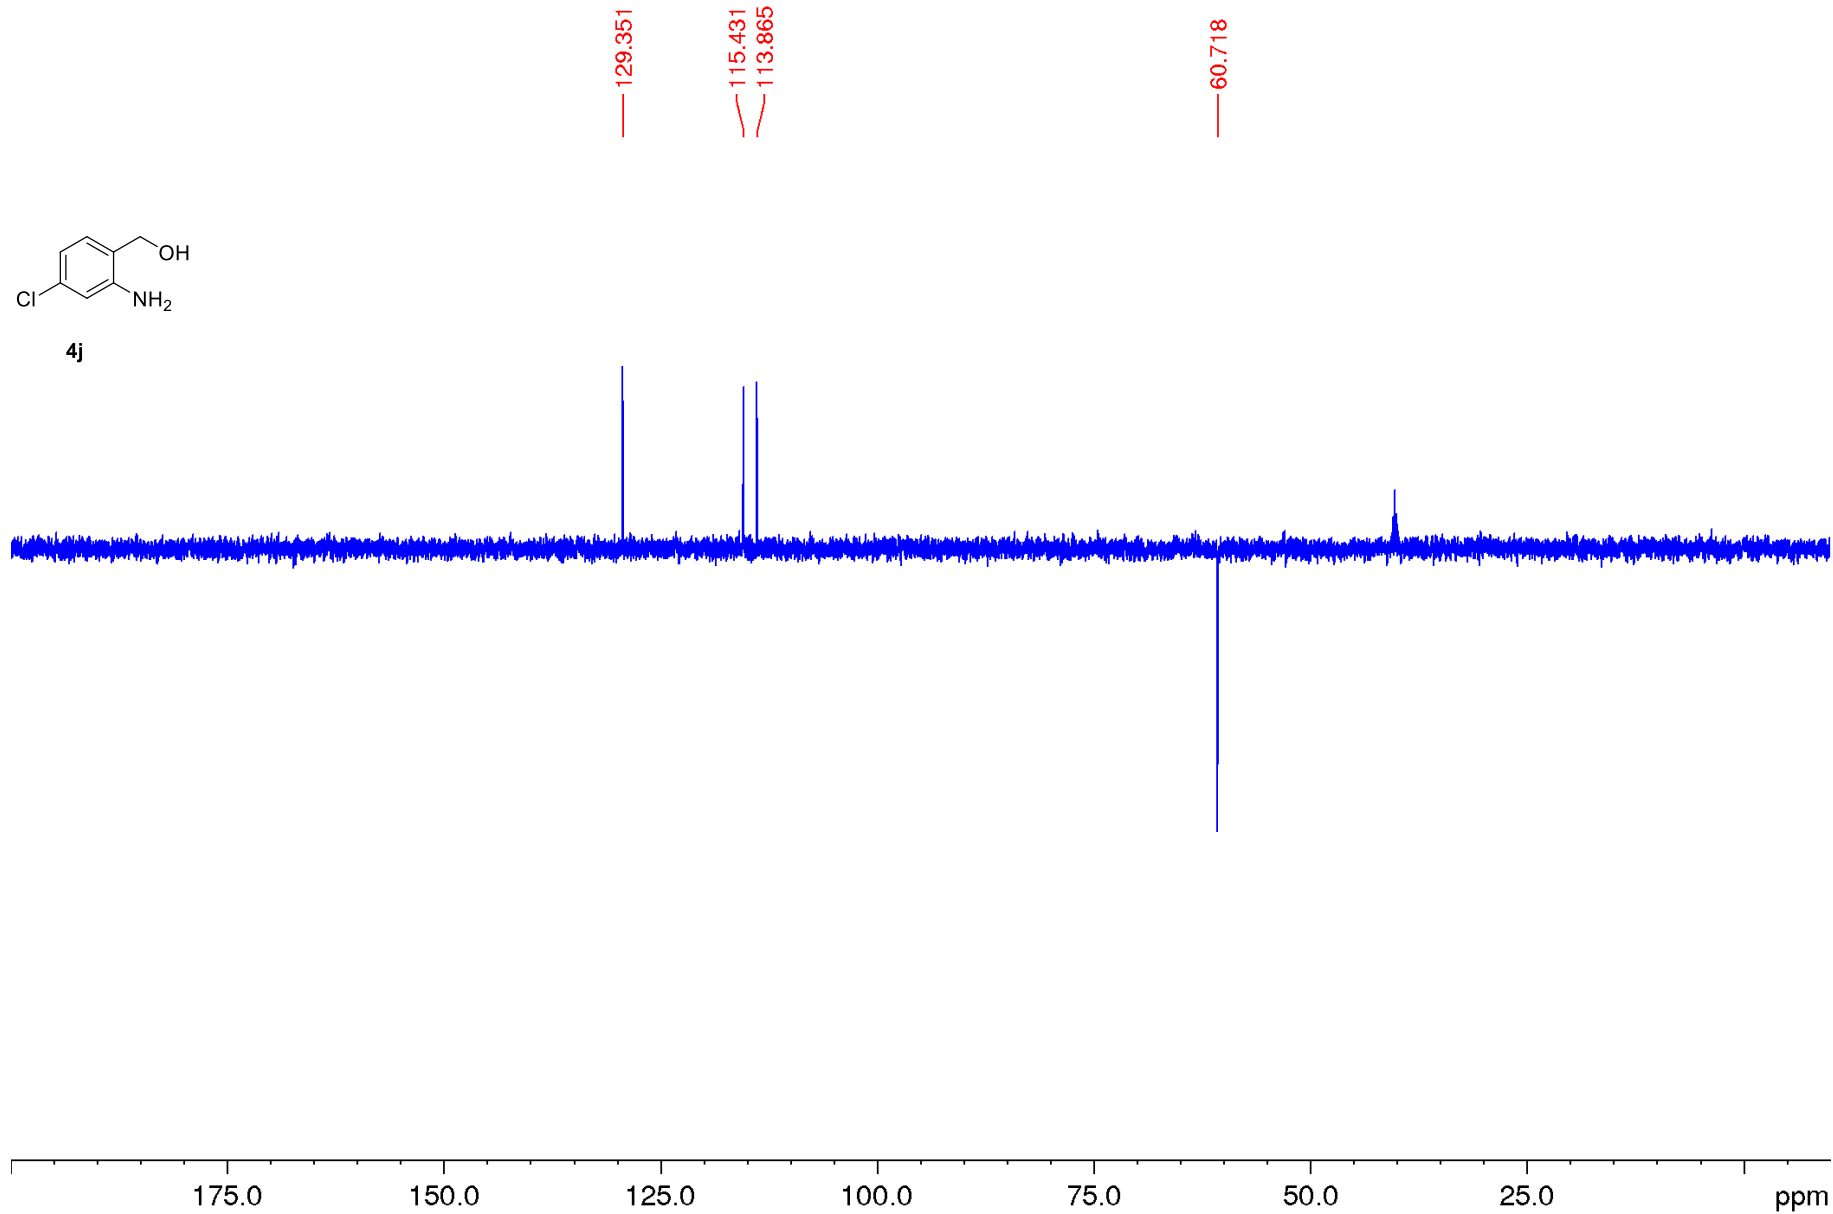

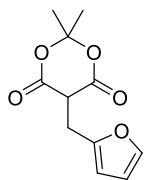

5b

7.299  
7.297  
7.294  
7.293  
7.260  
6.298  
6.293  
6.290  
6.285  
6.182  
6.180  
6.174  
6.172

3.847  
3.835  
3.822  
3.521  
3.508

1.794  
1.676

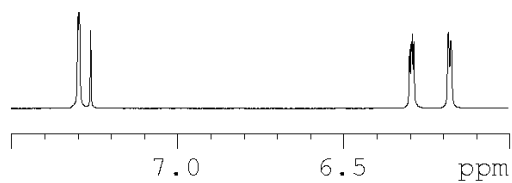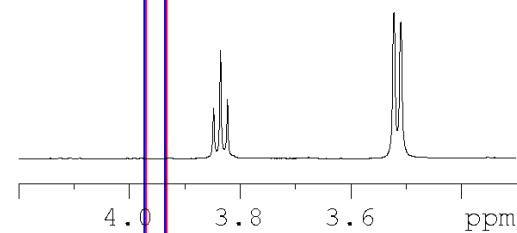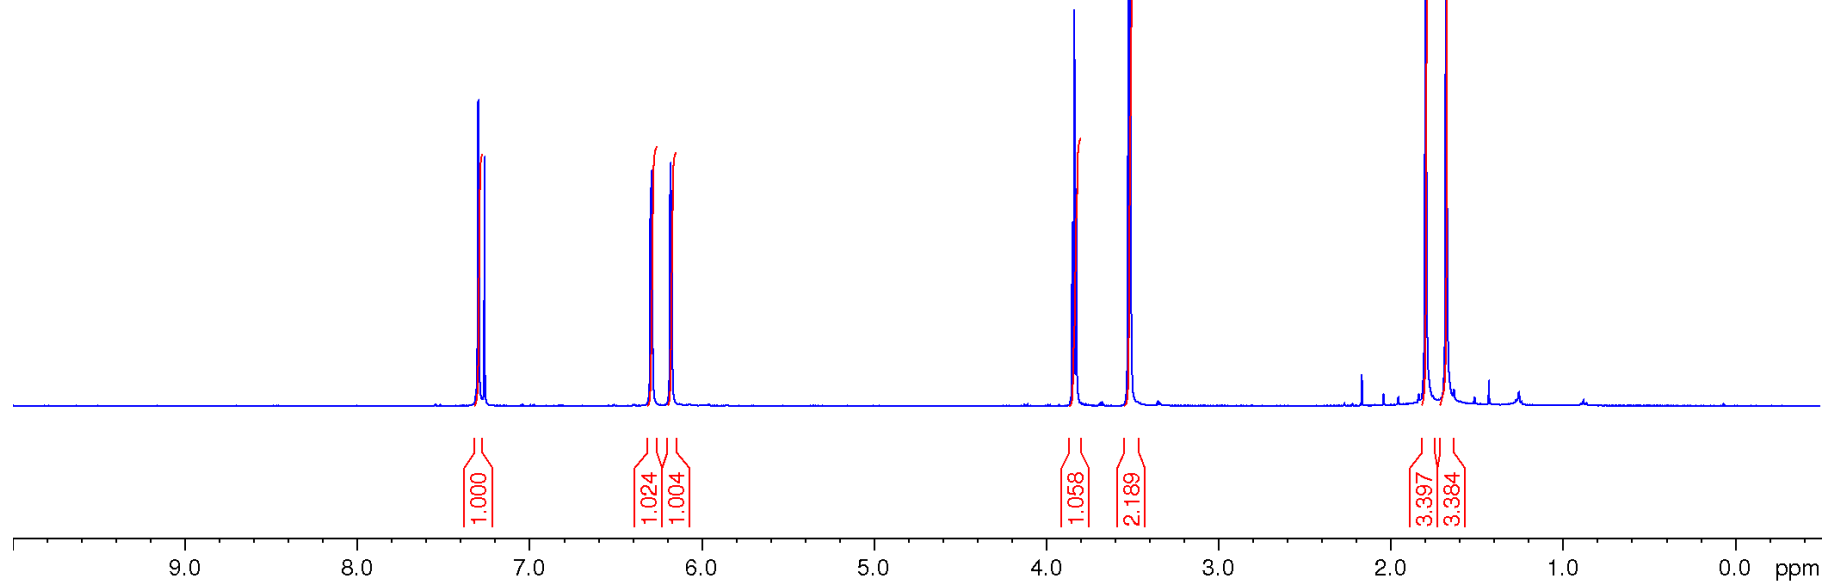

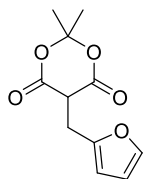

5b

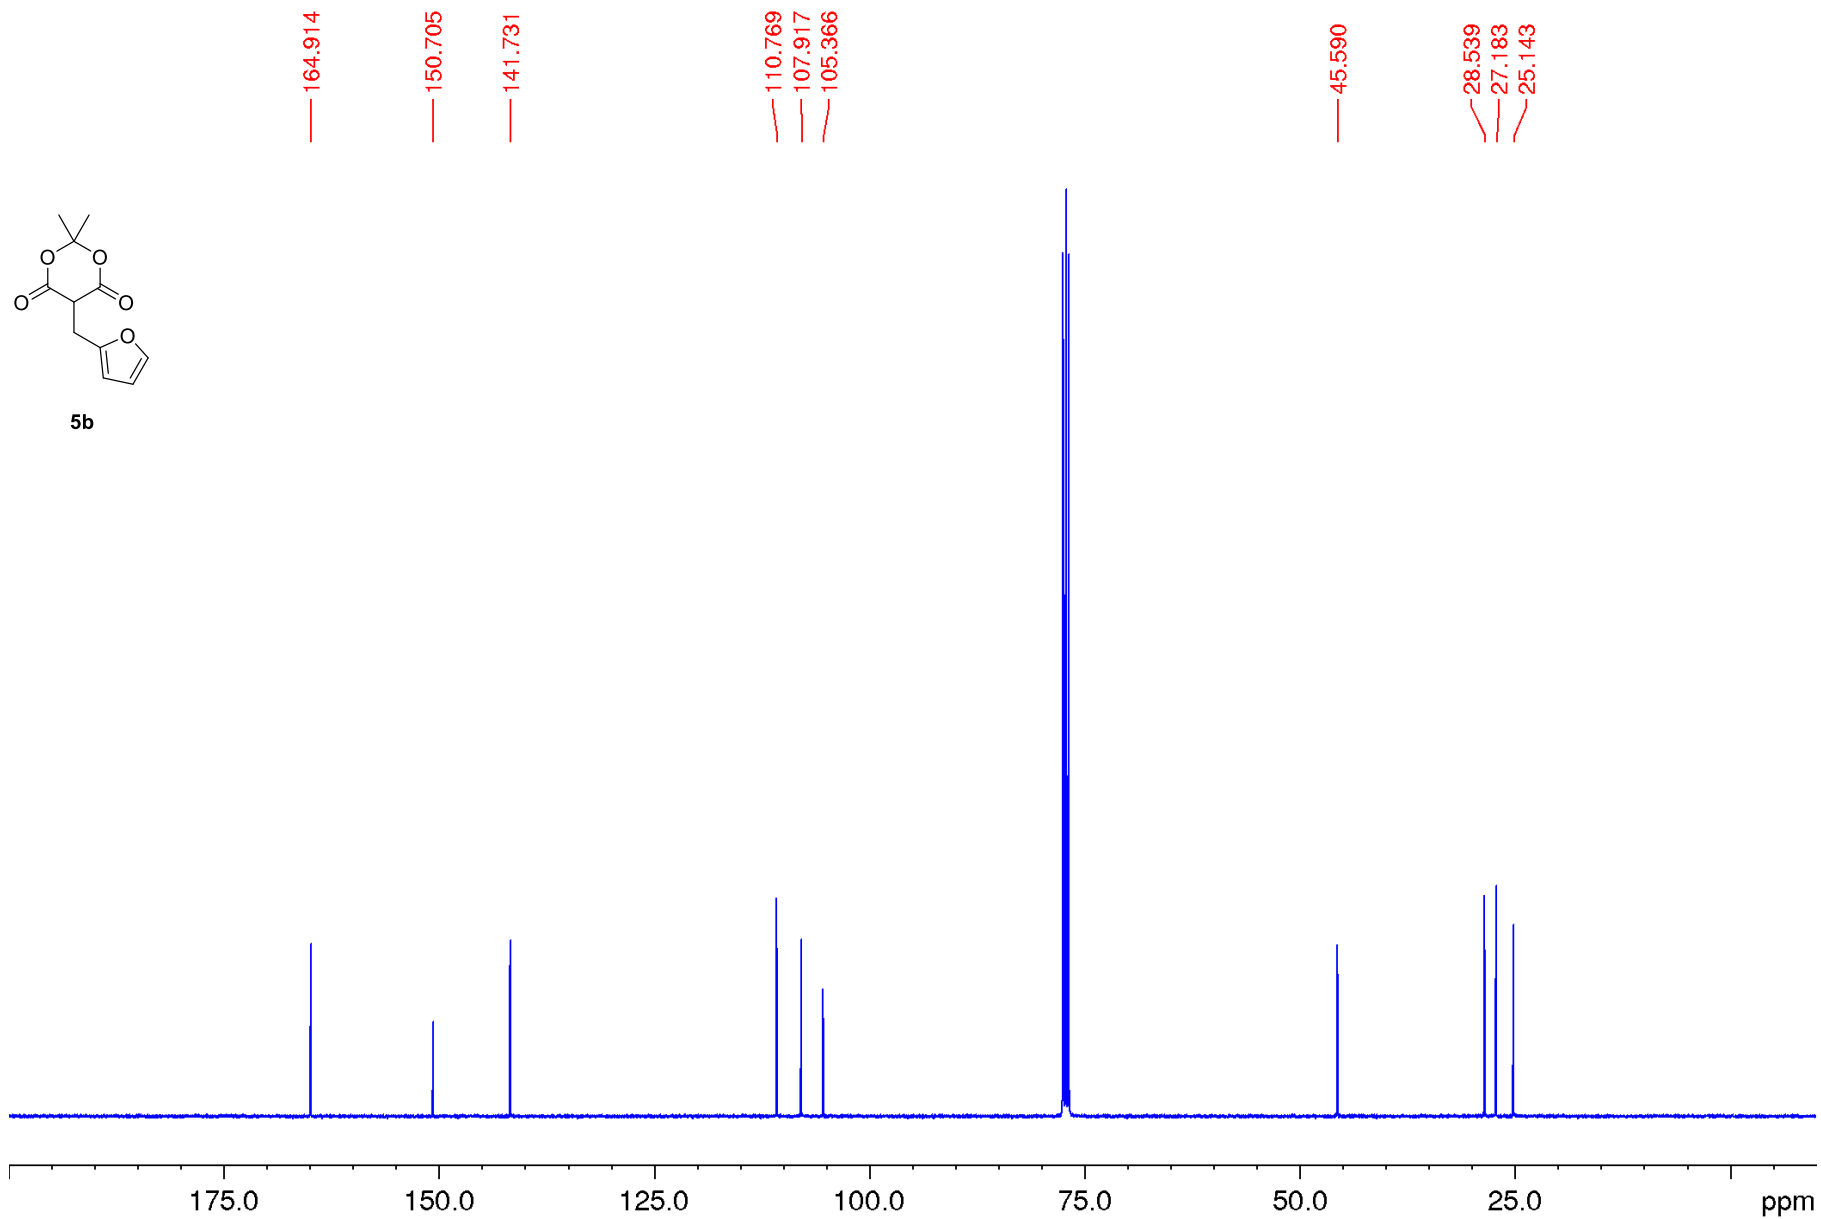

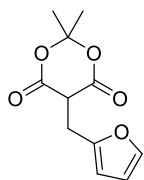

5b

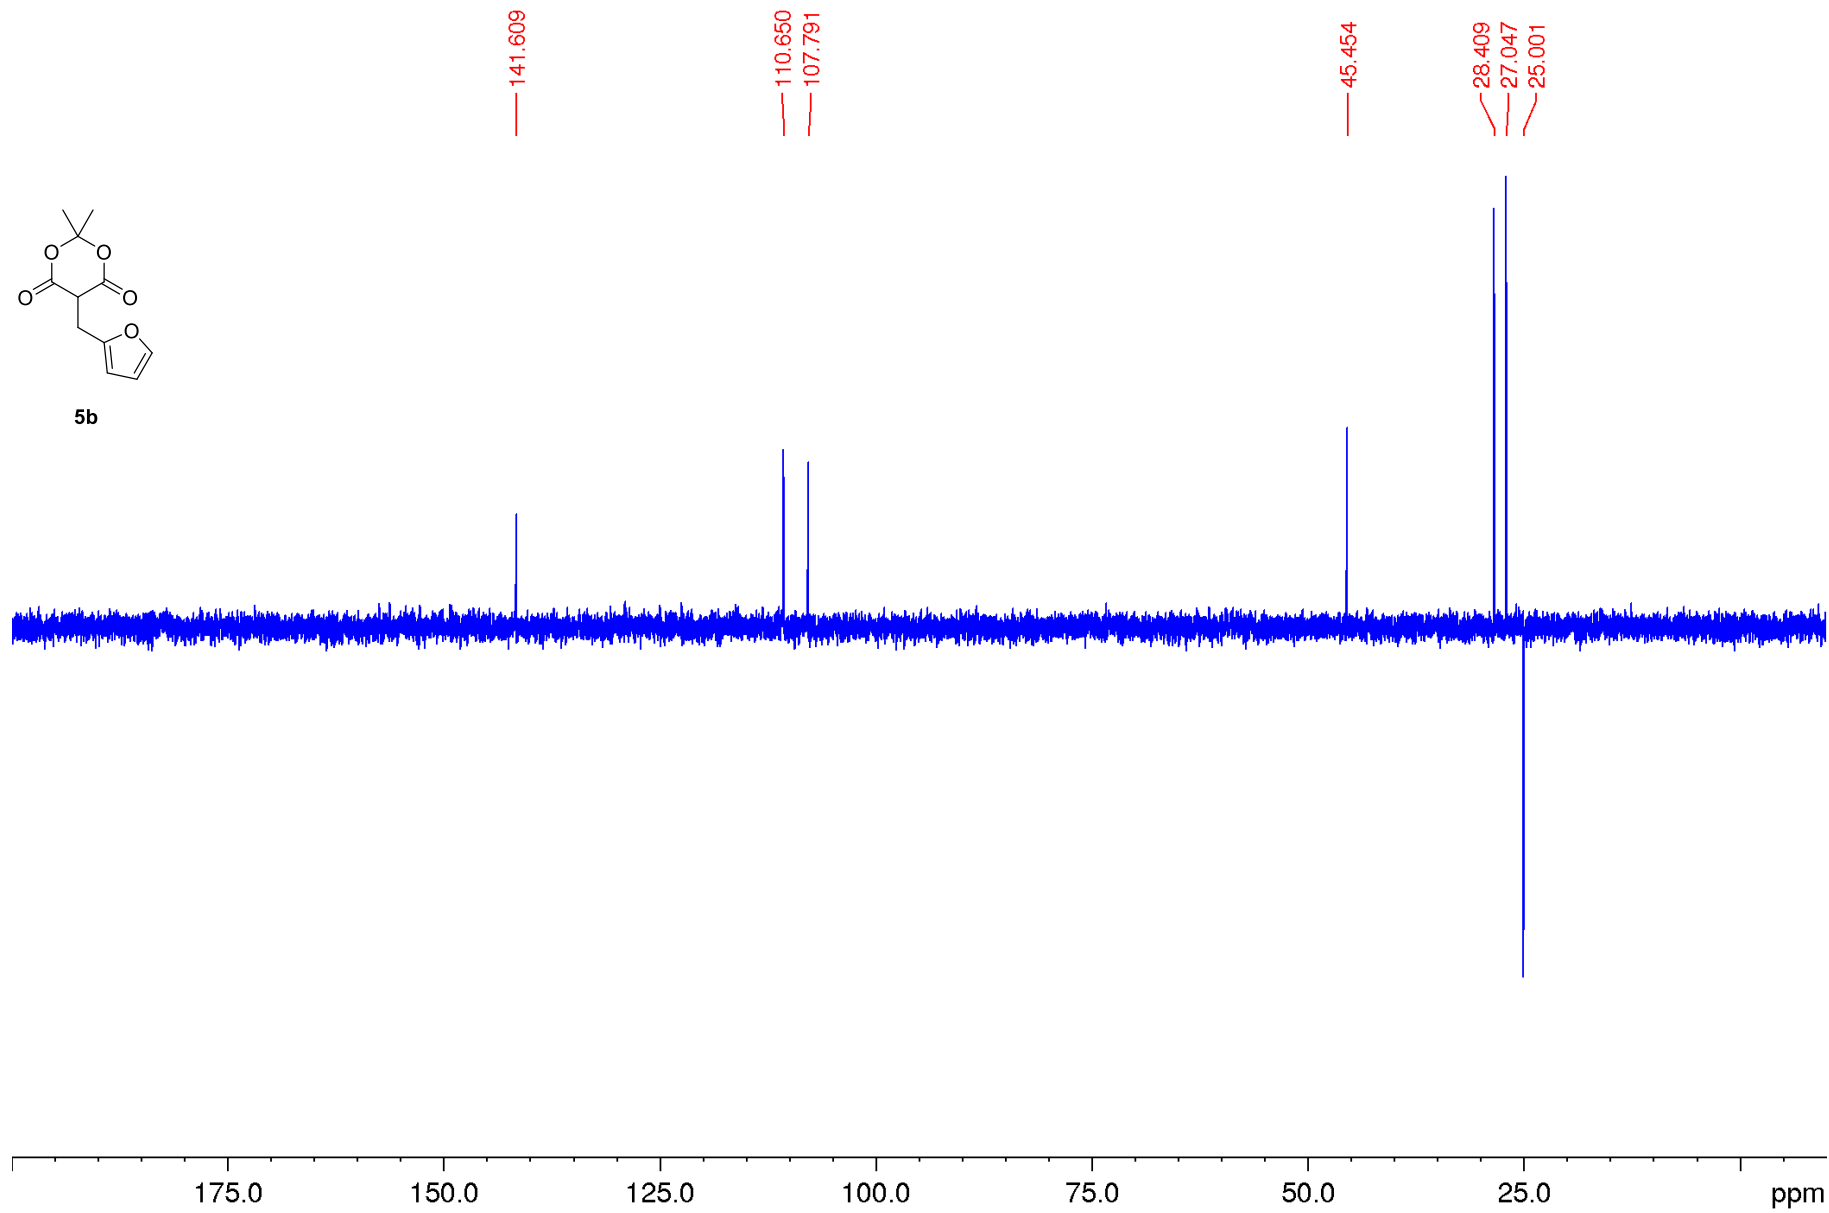

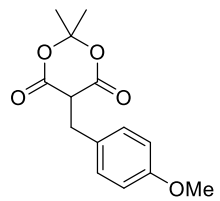

5c

7.260  
7.249  
7.227  
6.827  
6.805

3.773  
3.730  
3.718  
3.706  
3.445  
3.433

1.722  
1.721  
1.479  
1.478

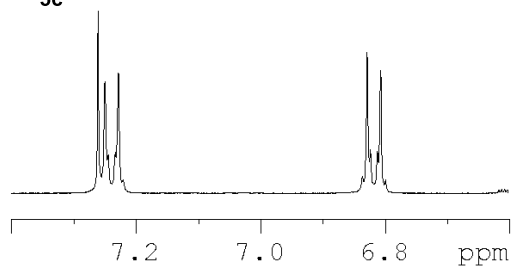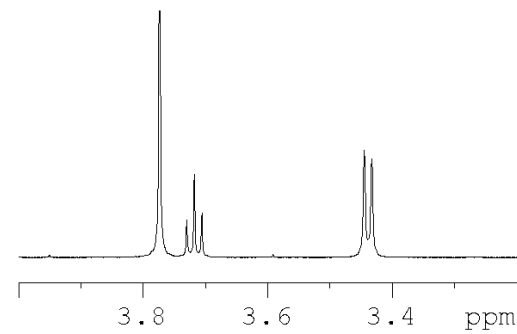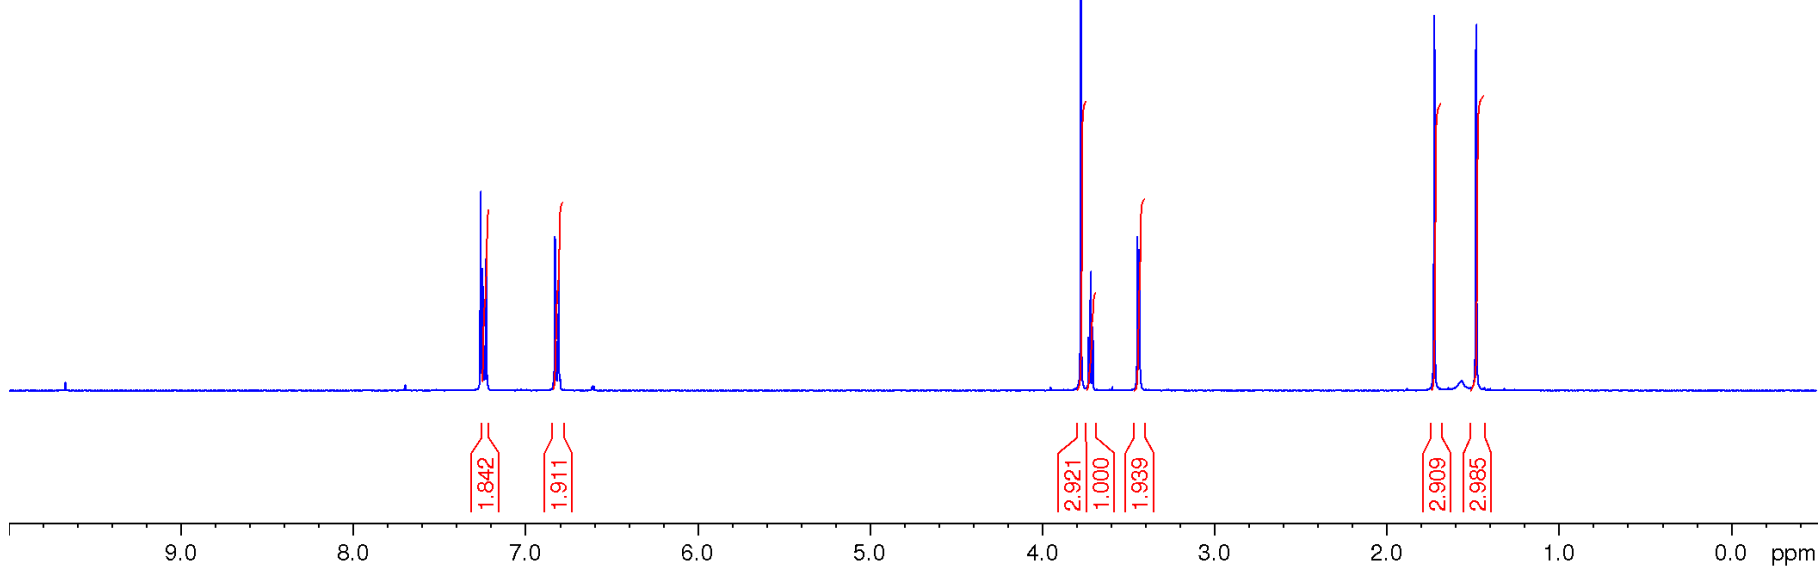

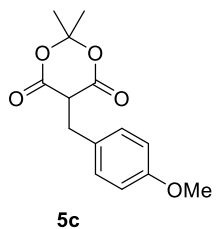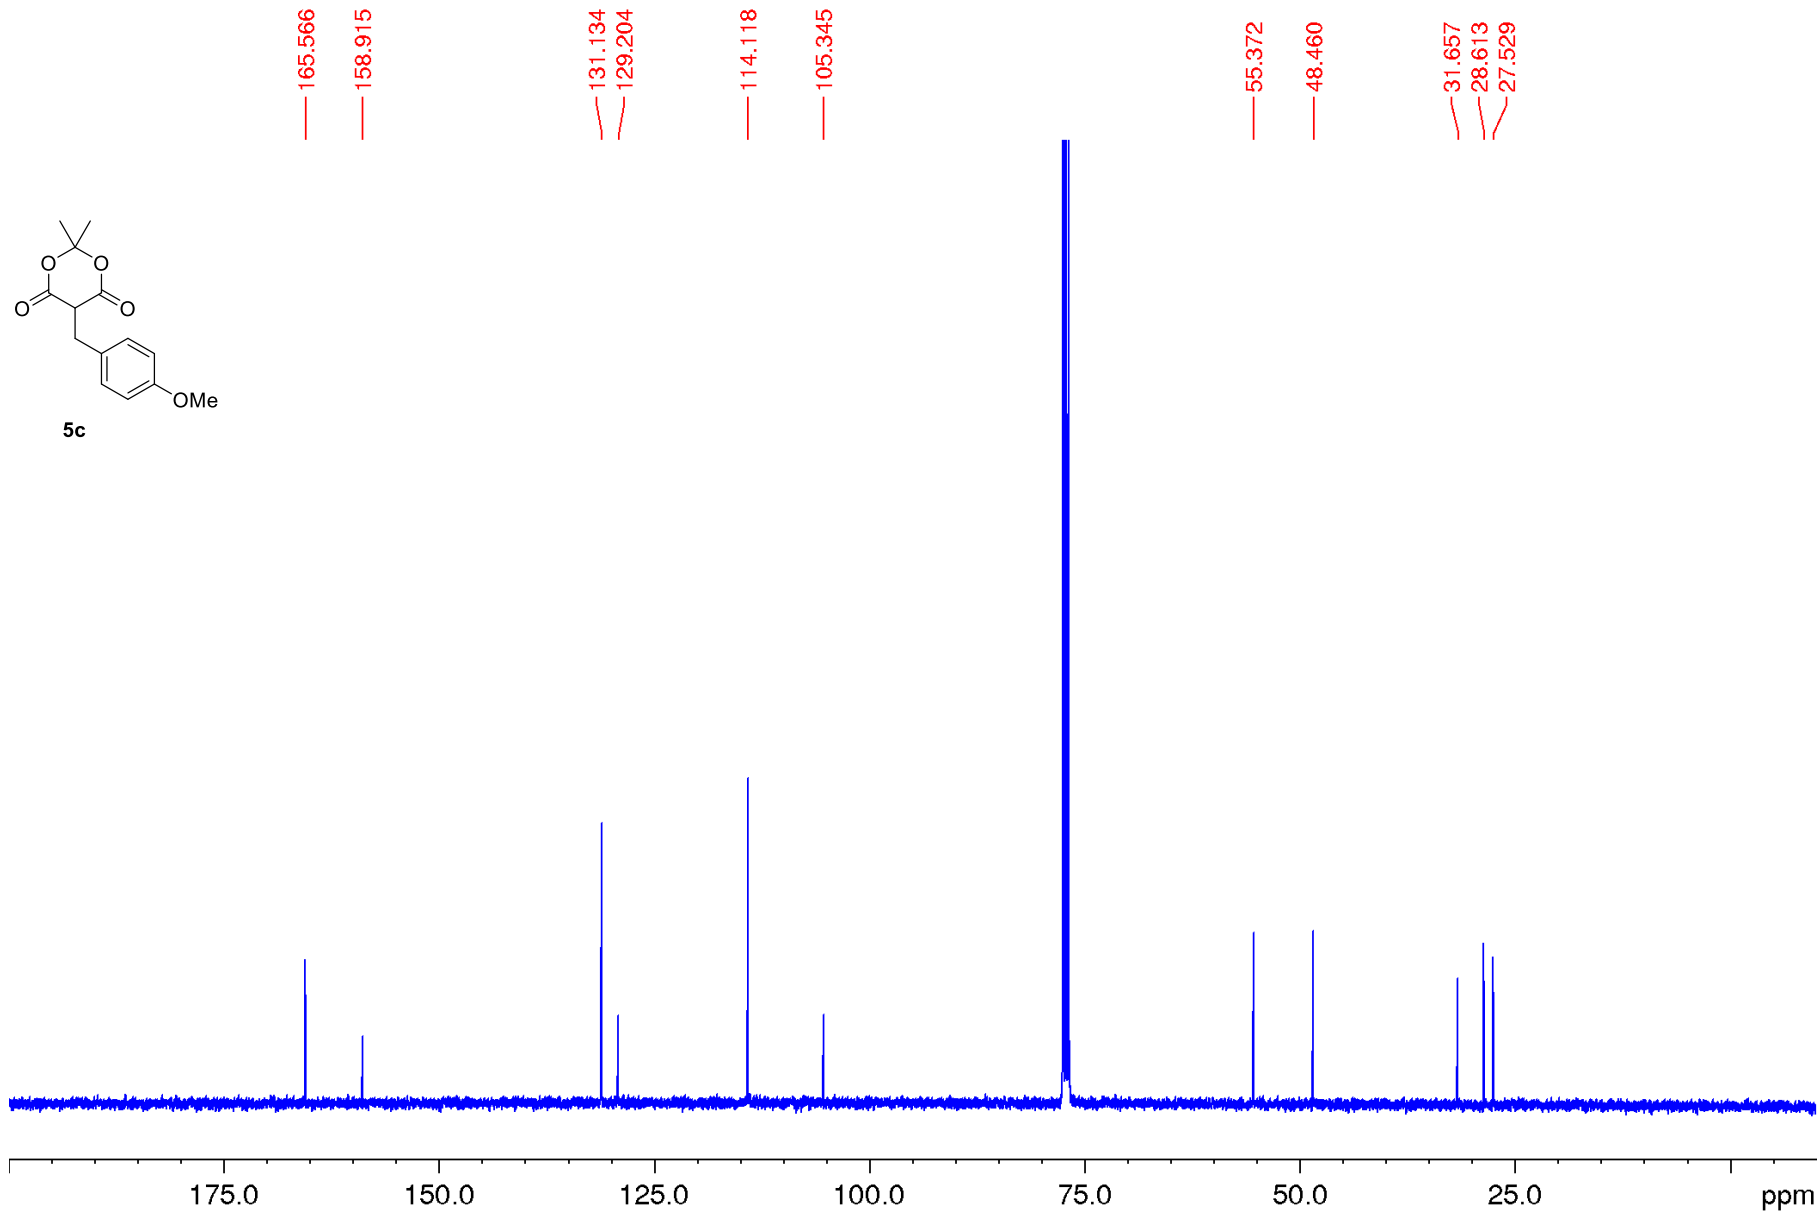



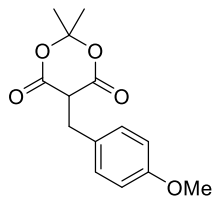

5c

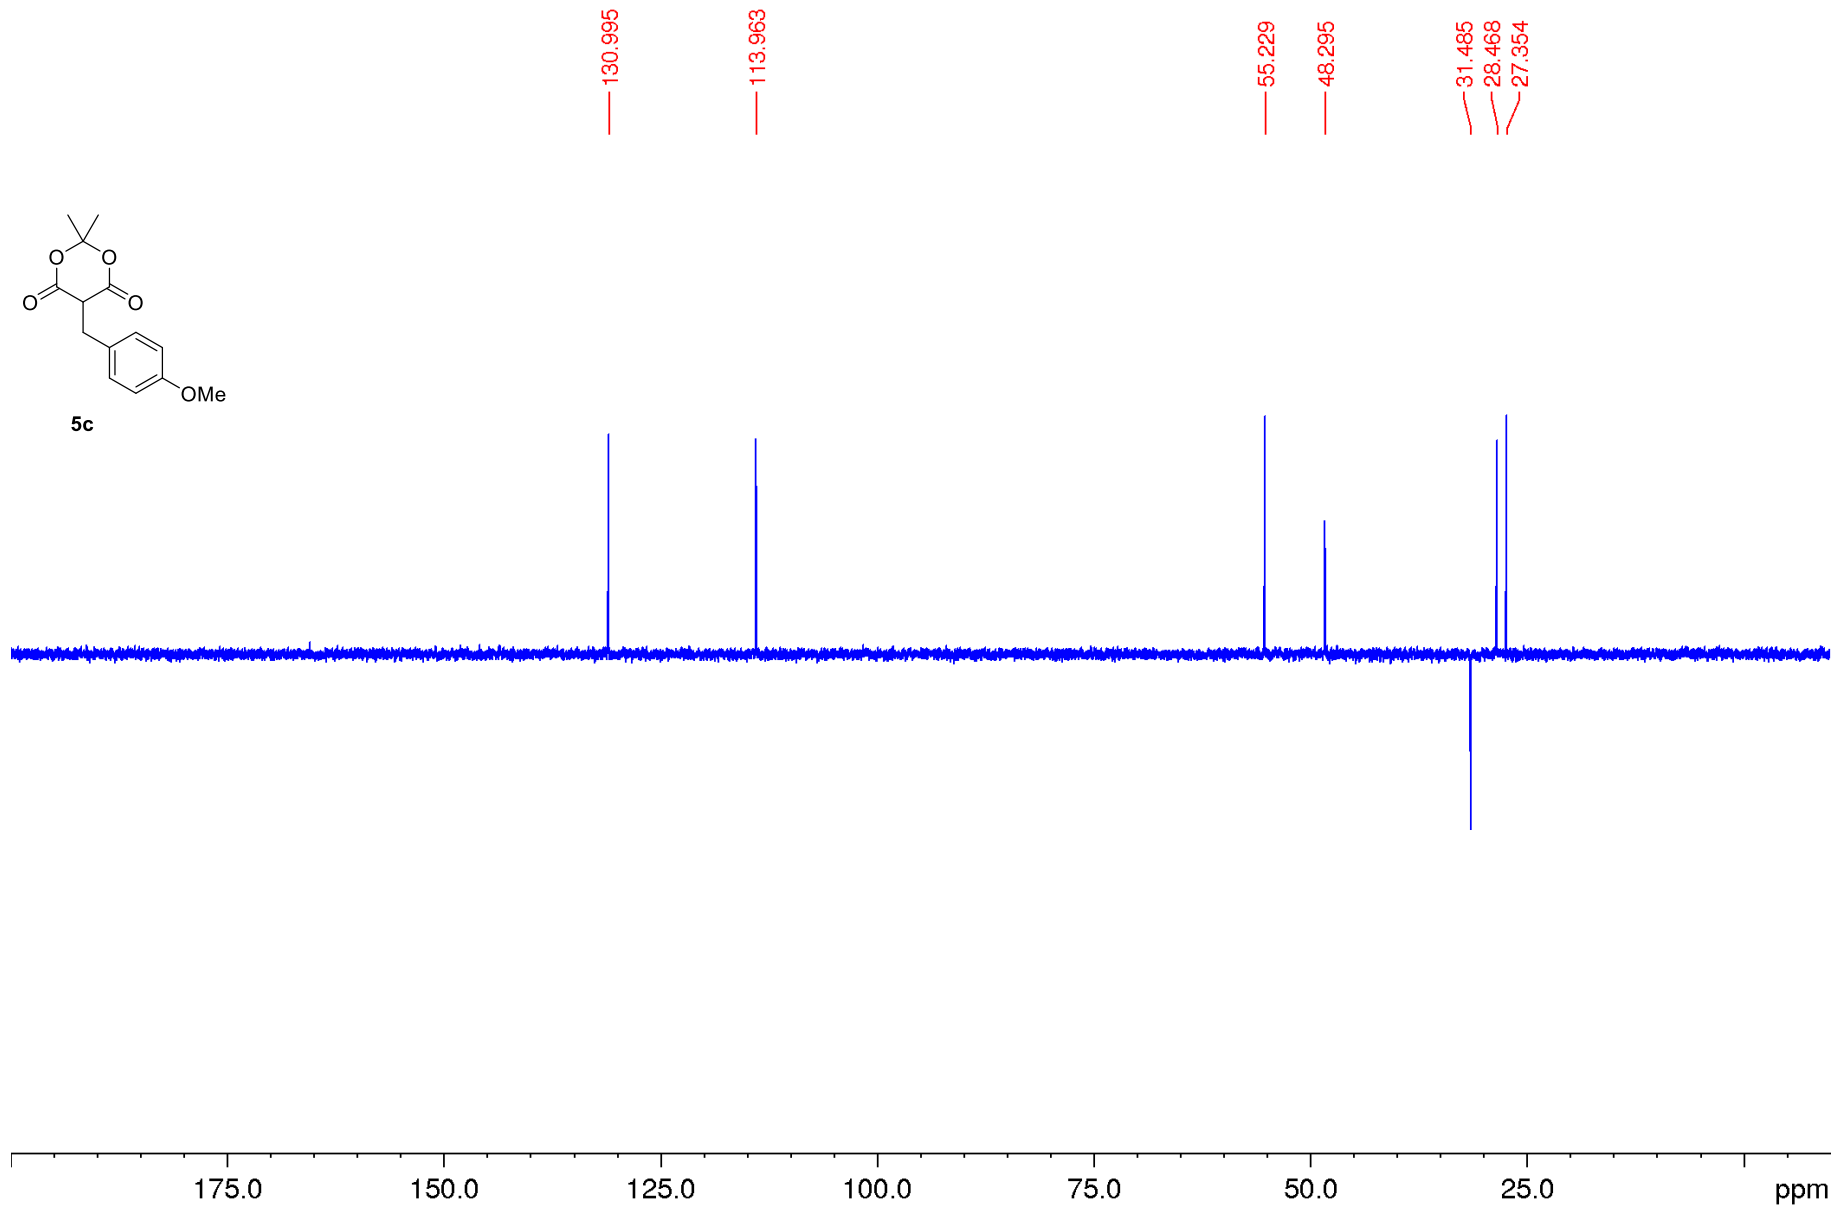

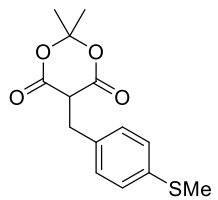

5d

7.279  
7.258  
7.207  
7.202  
7.197  
7.186  
7.181  
7.176

3.772  
3.759  
3.747  
3.468  
3.456

2.473

1.755  
1.755  
1.563  
1.563

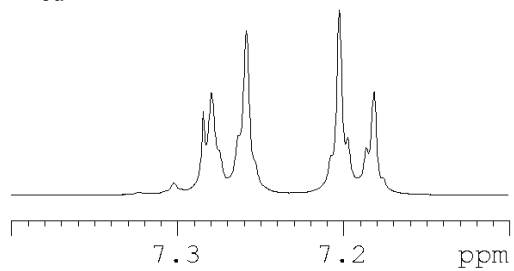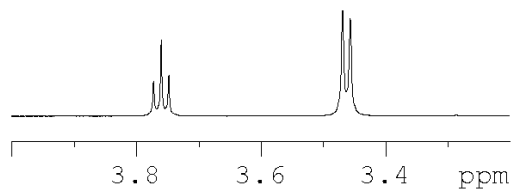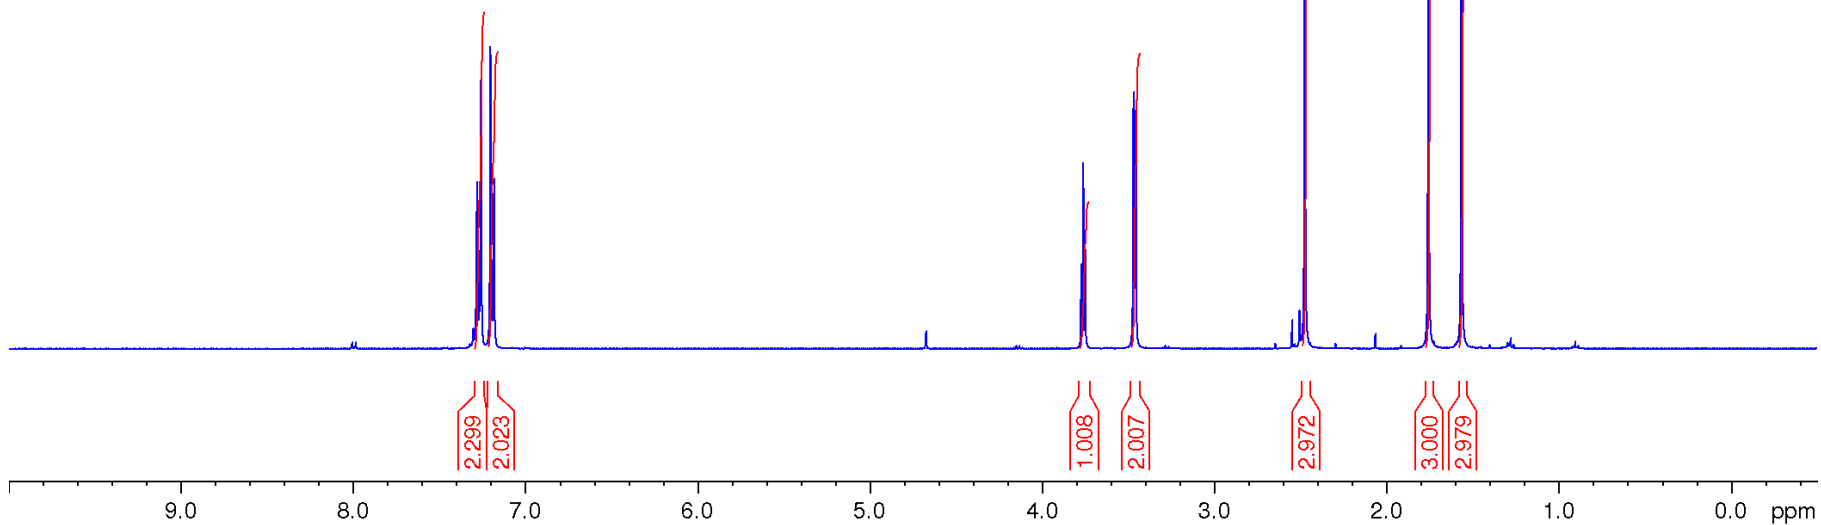

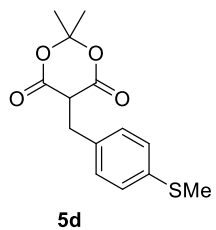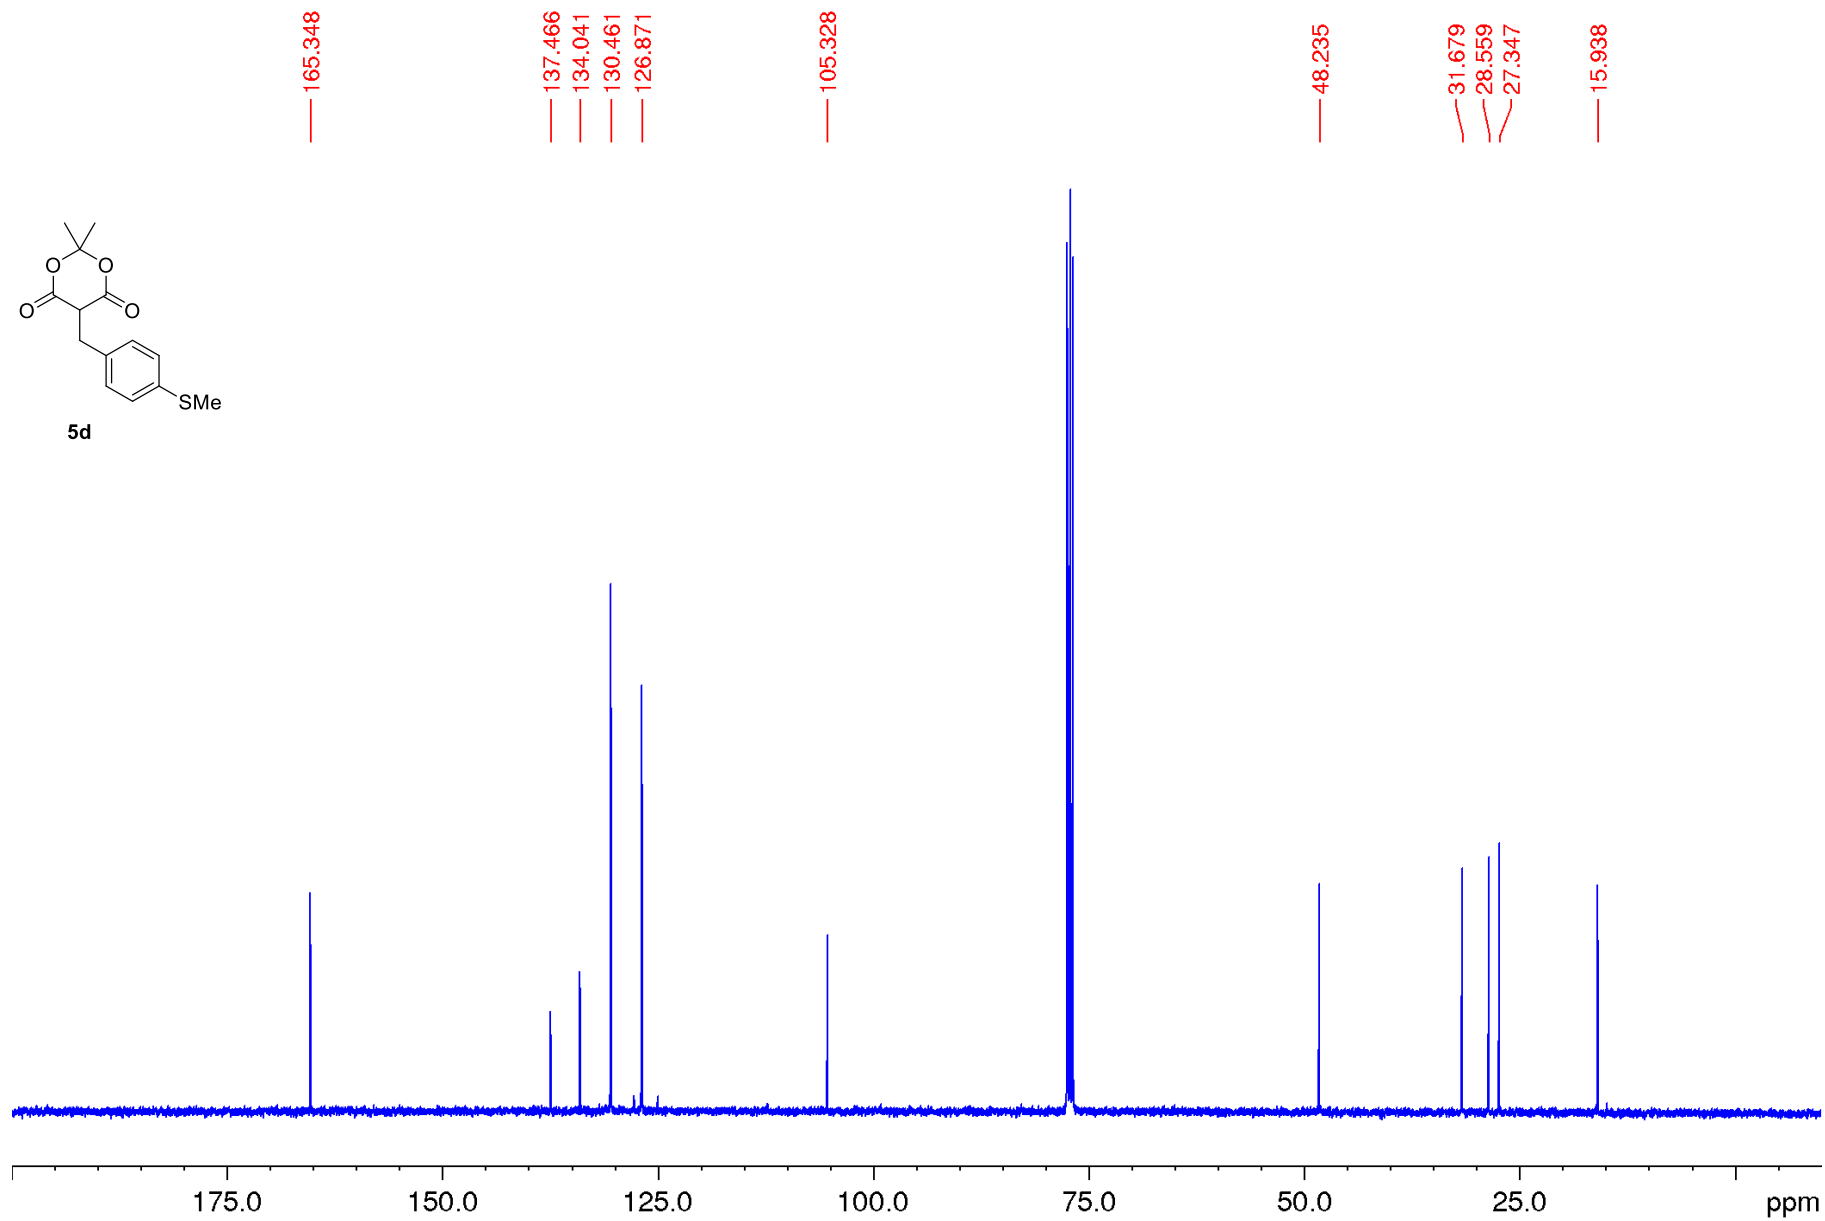

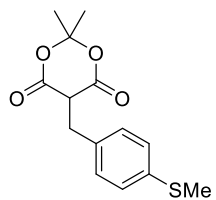

5d

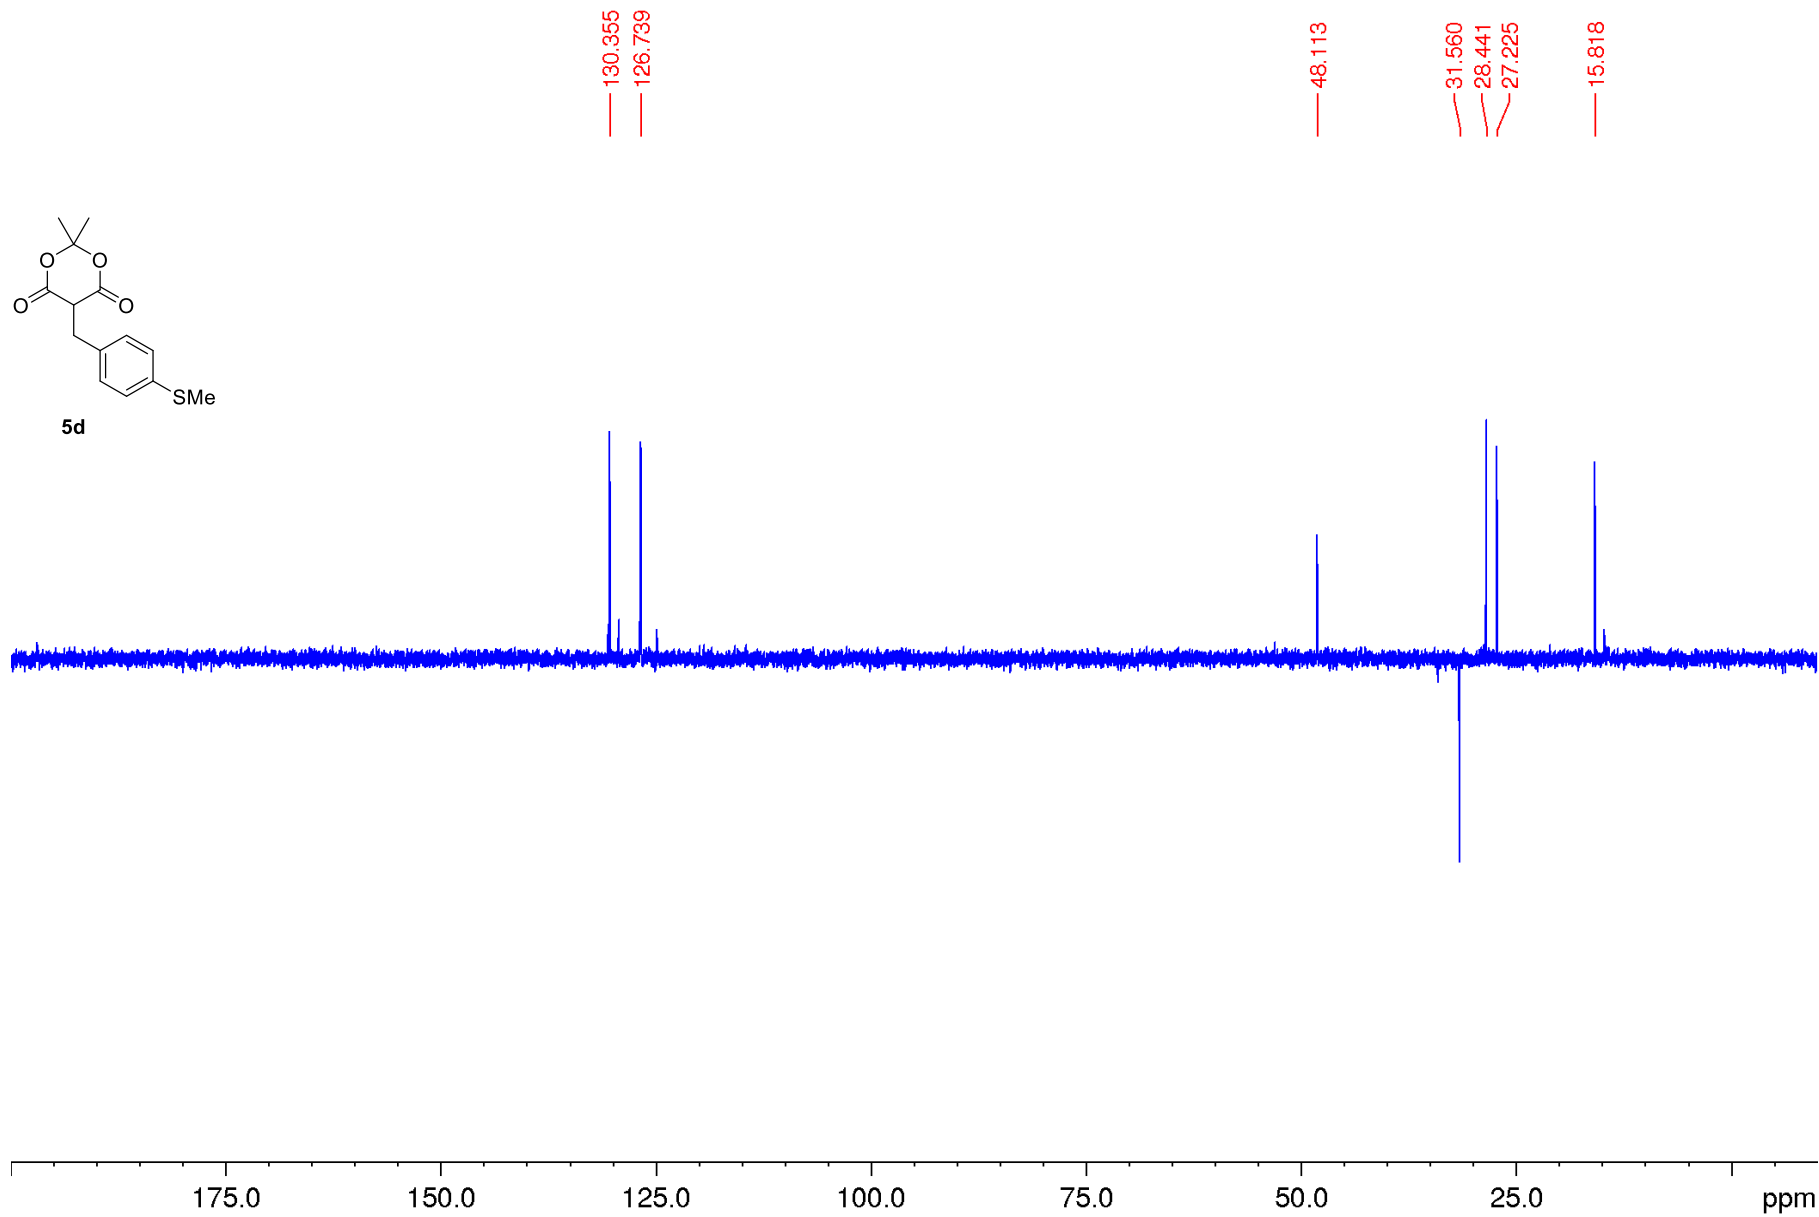

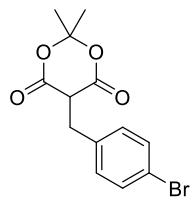

5e

7.422  
7.401  
7.260  
7.226  
7.205

3.743  
3.731  
3.719  
3.443  
3.430

1.749  
1.588

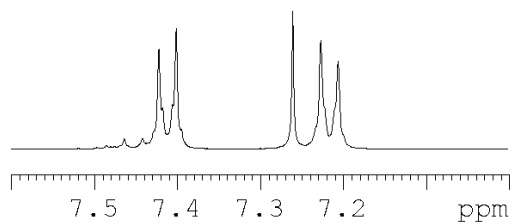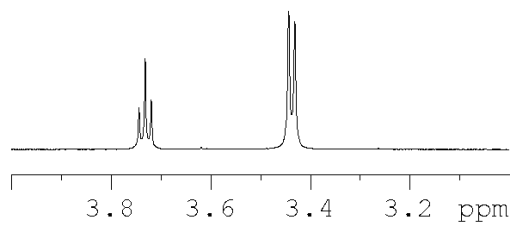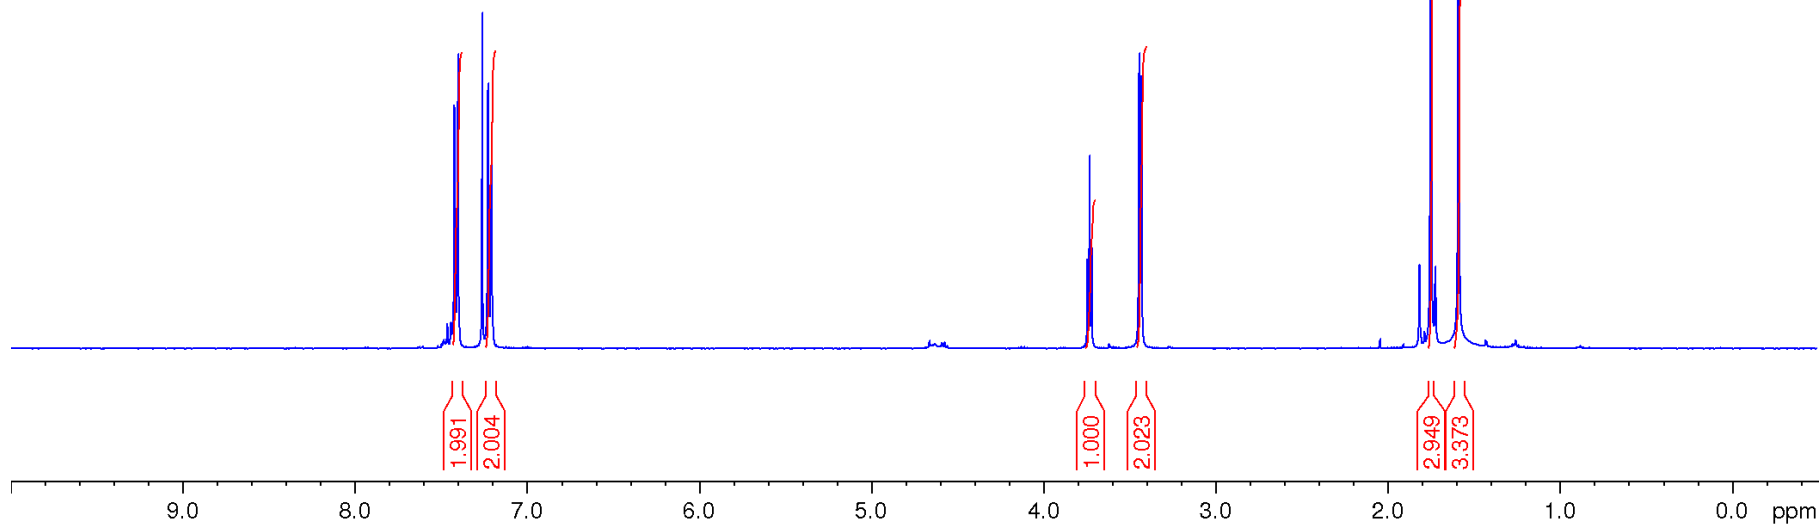

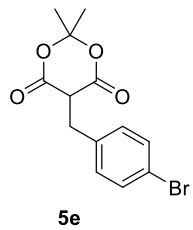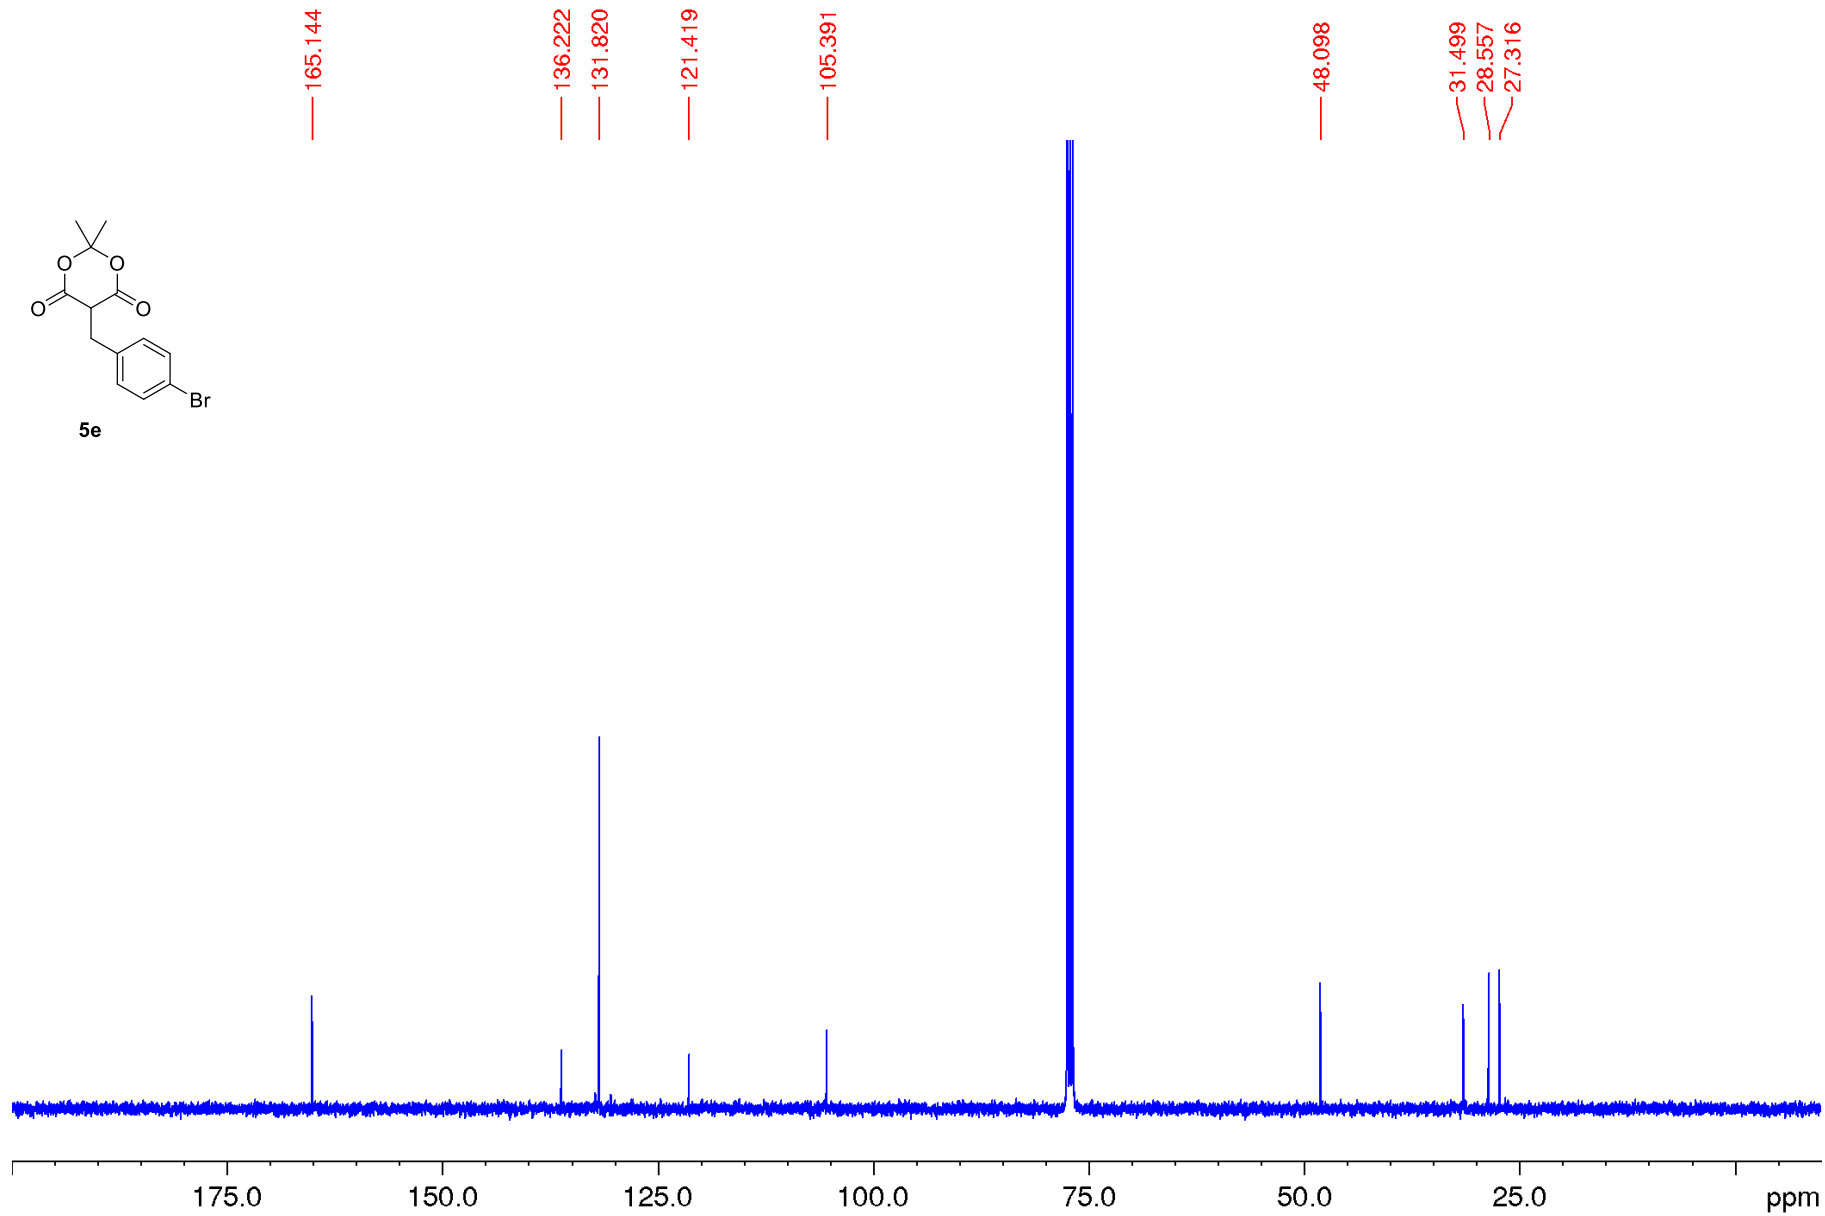

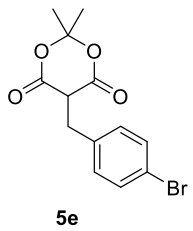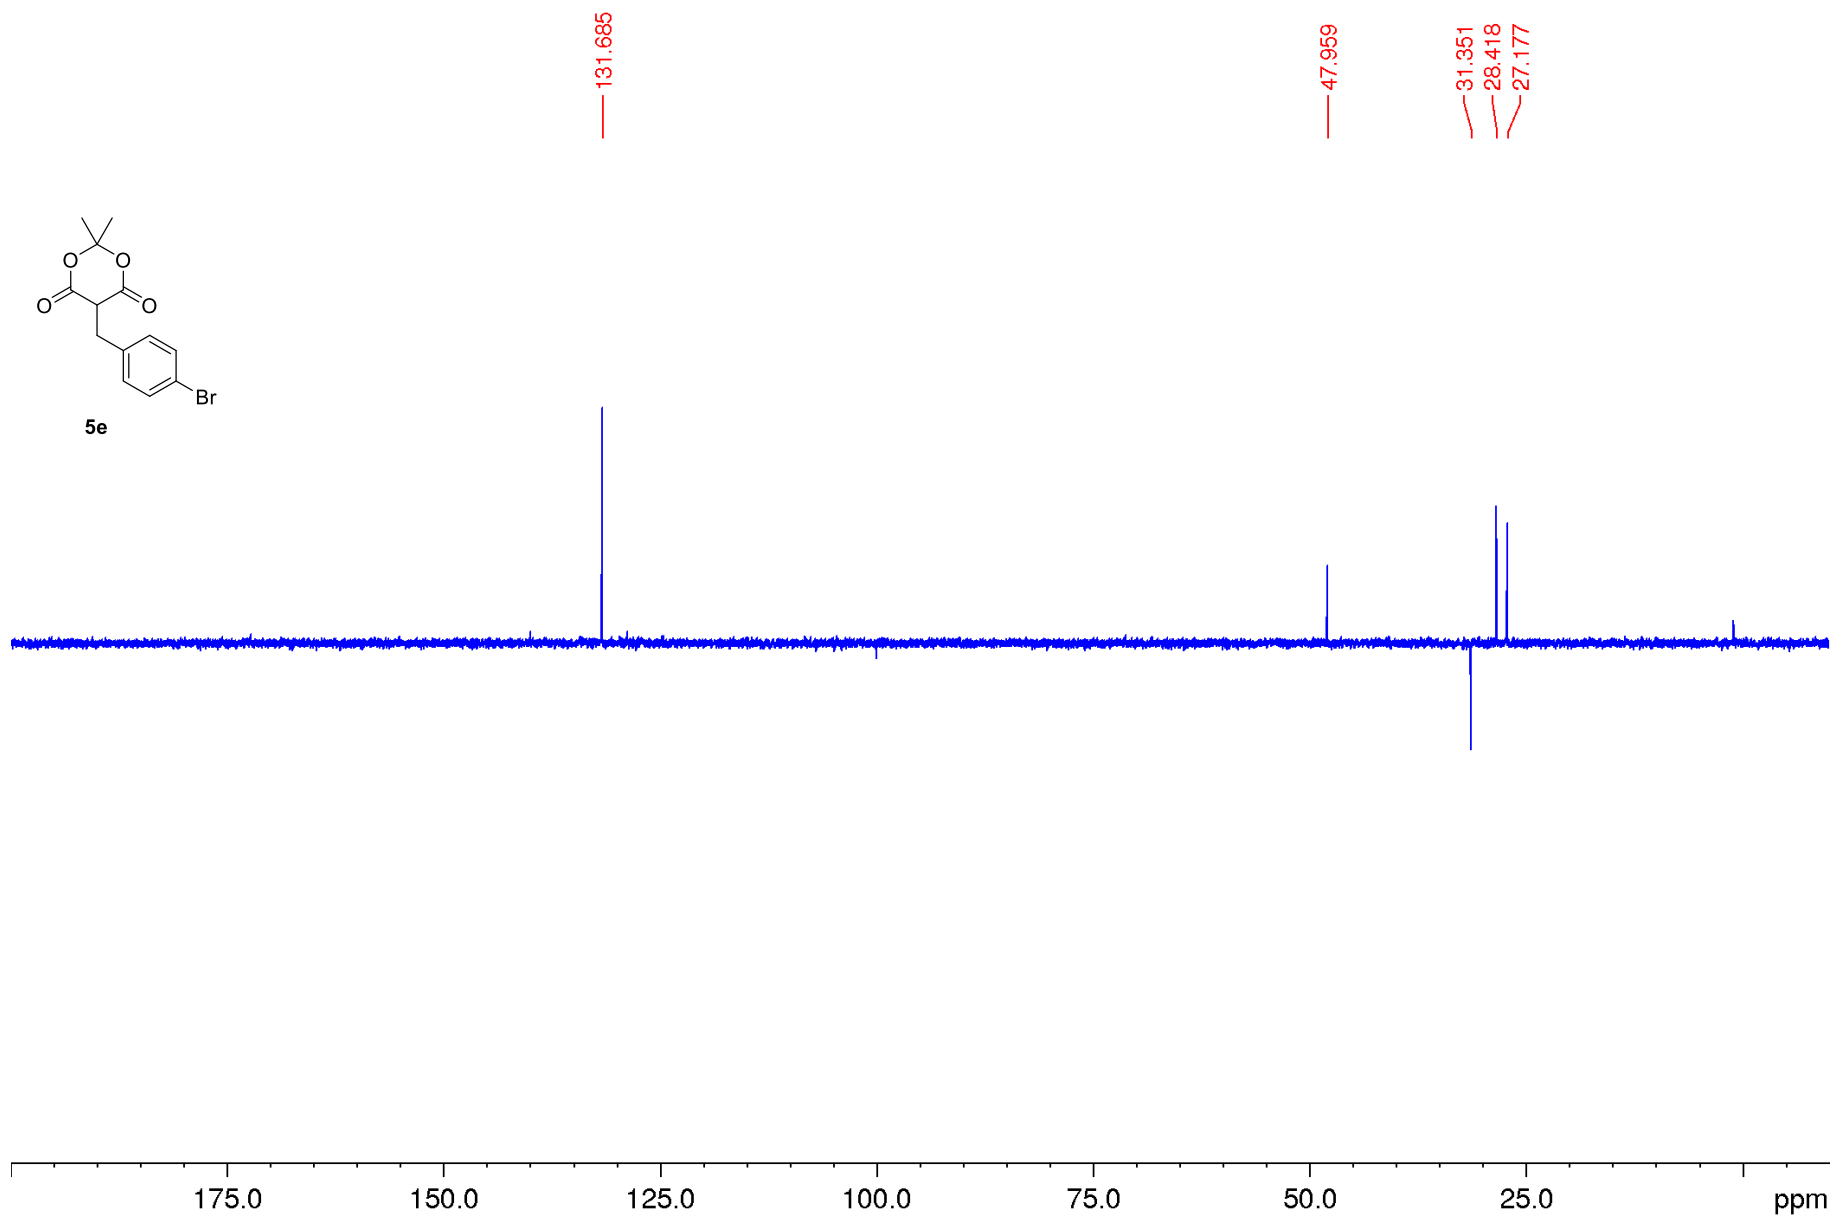

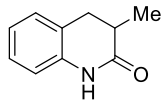

6a

8.172  
7.260  
7.190  
7.171  
7.164  
7.152  
7.146  
7.145  
7.001  
6.999  
6.983  
6.980  
6.964  
6.961  
6.779  
6.759

3.023  
3.009  
2.985  
2.972  
2.777  
2.750  
2.739  
2.712  
2.696  
2.693  
2.679  
2.676  
2.669  
2.665  
2.662  
2.652  
2.649  
2.645  
2.635  
1.299  
1.282

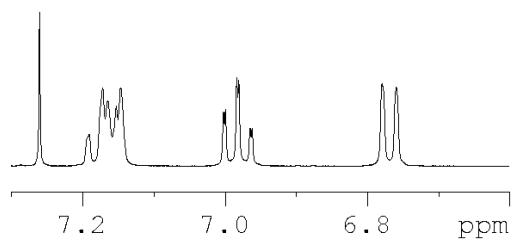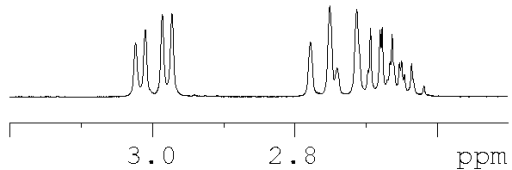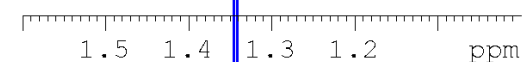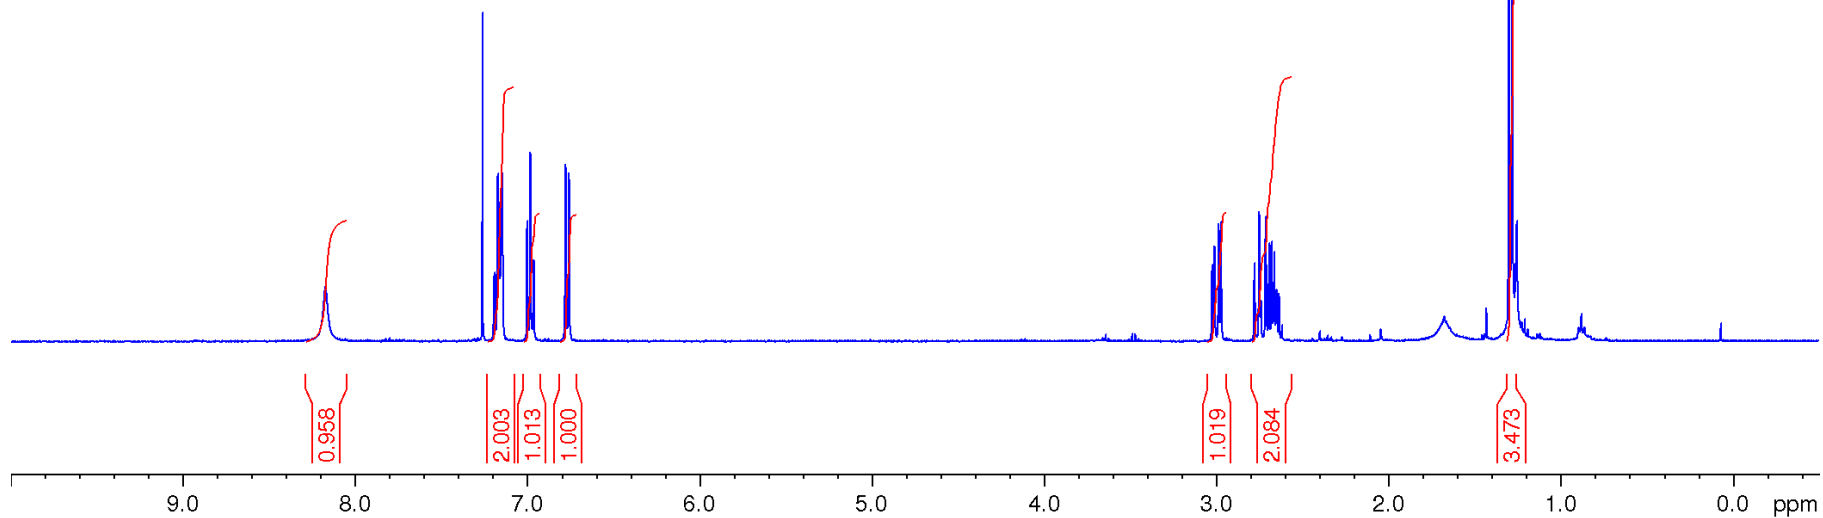



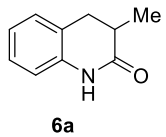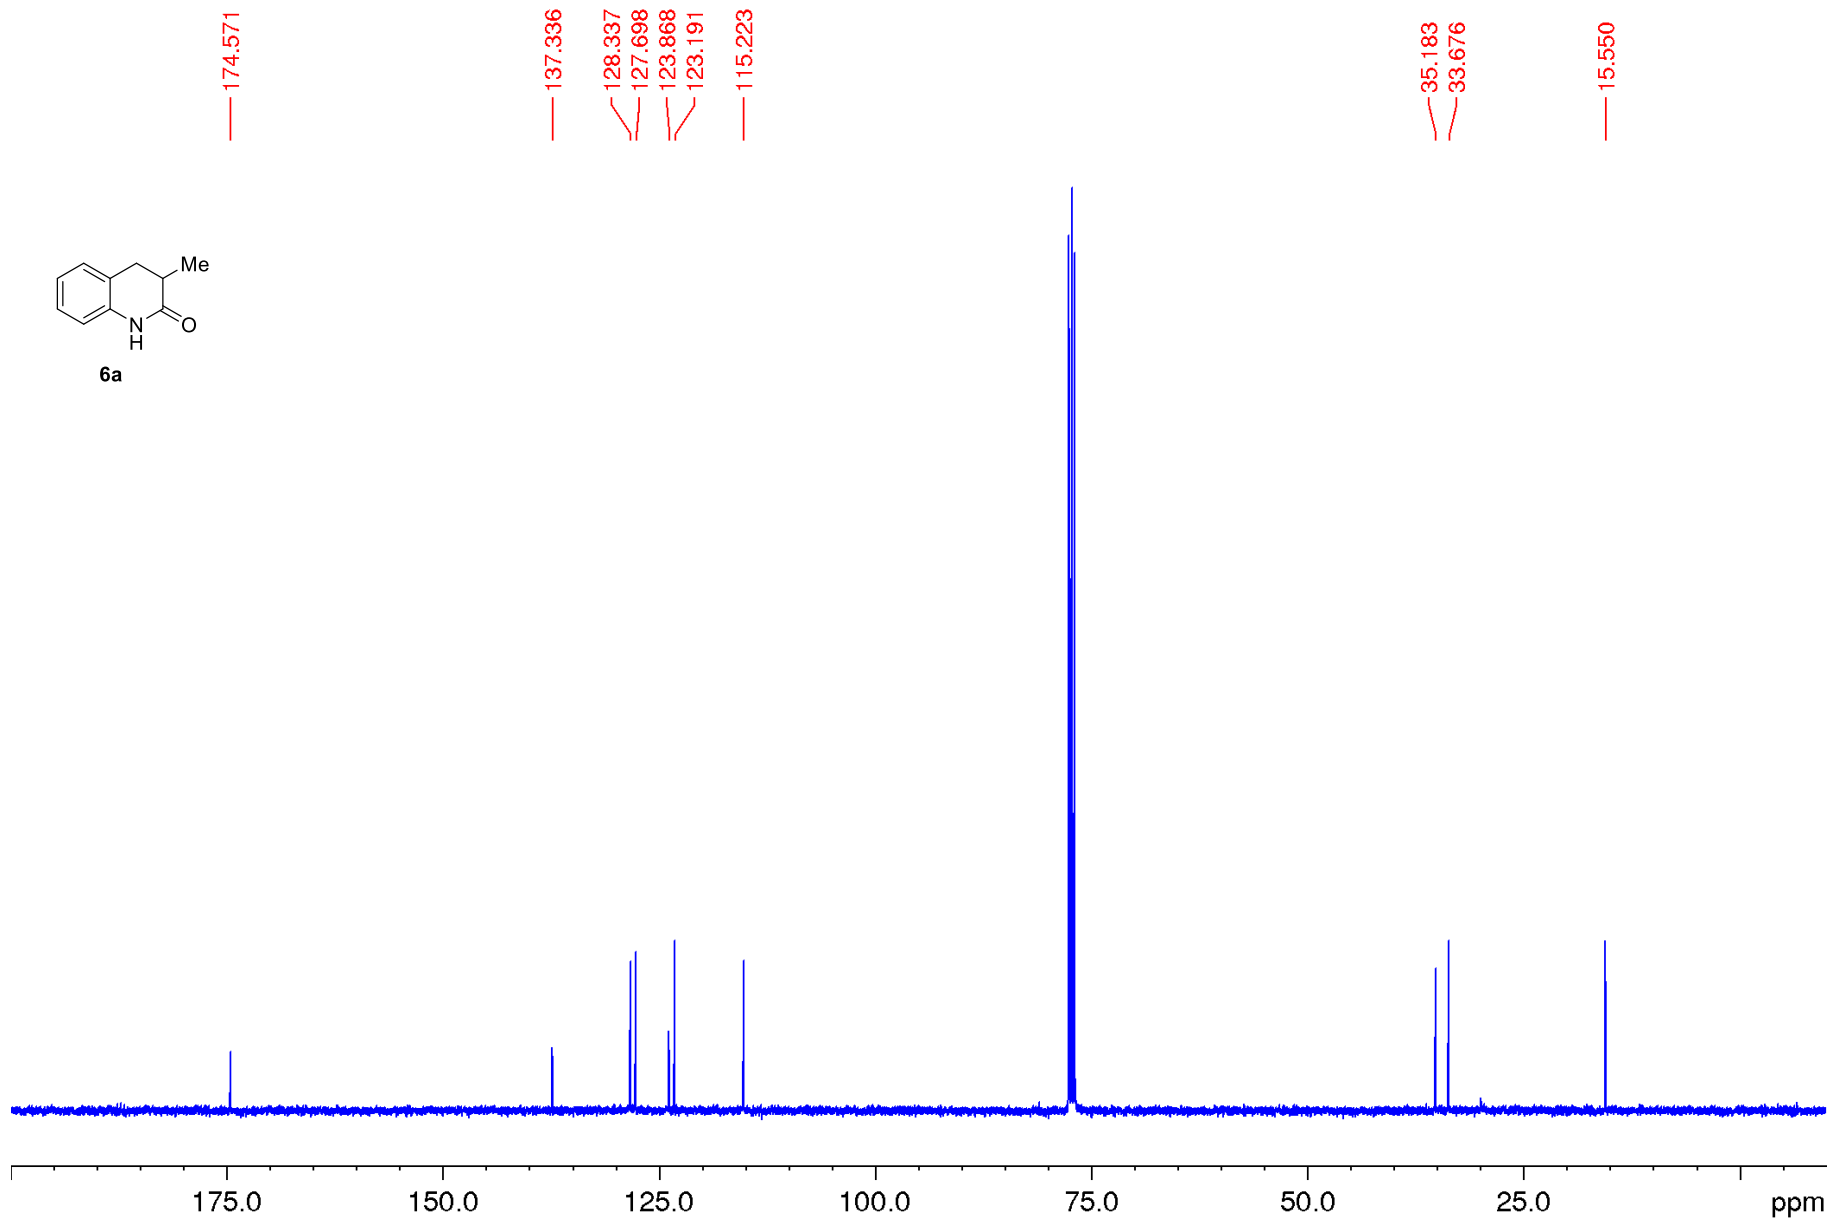

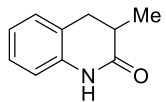

6a

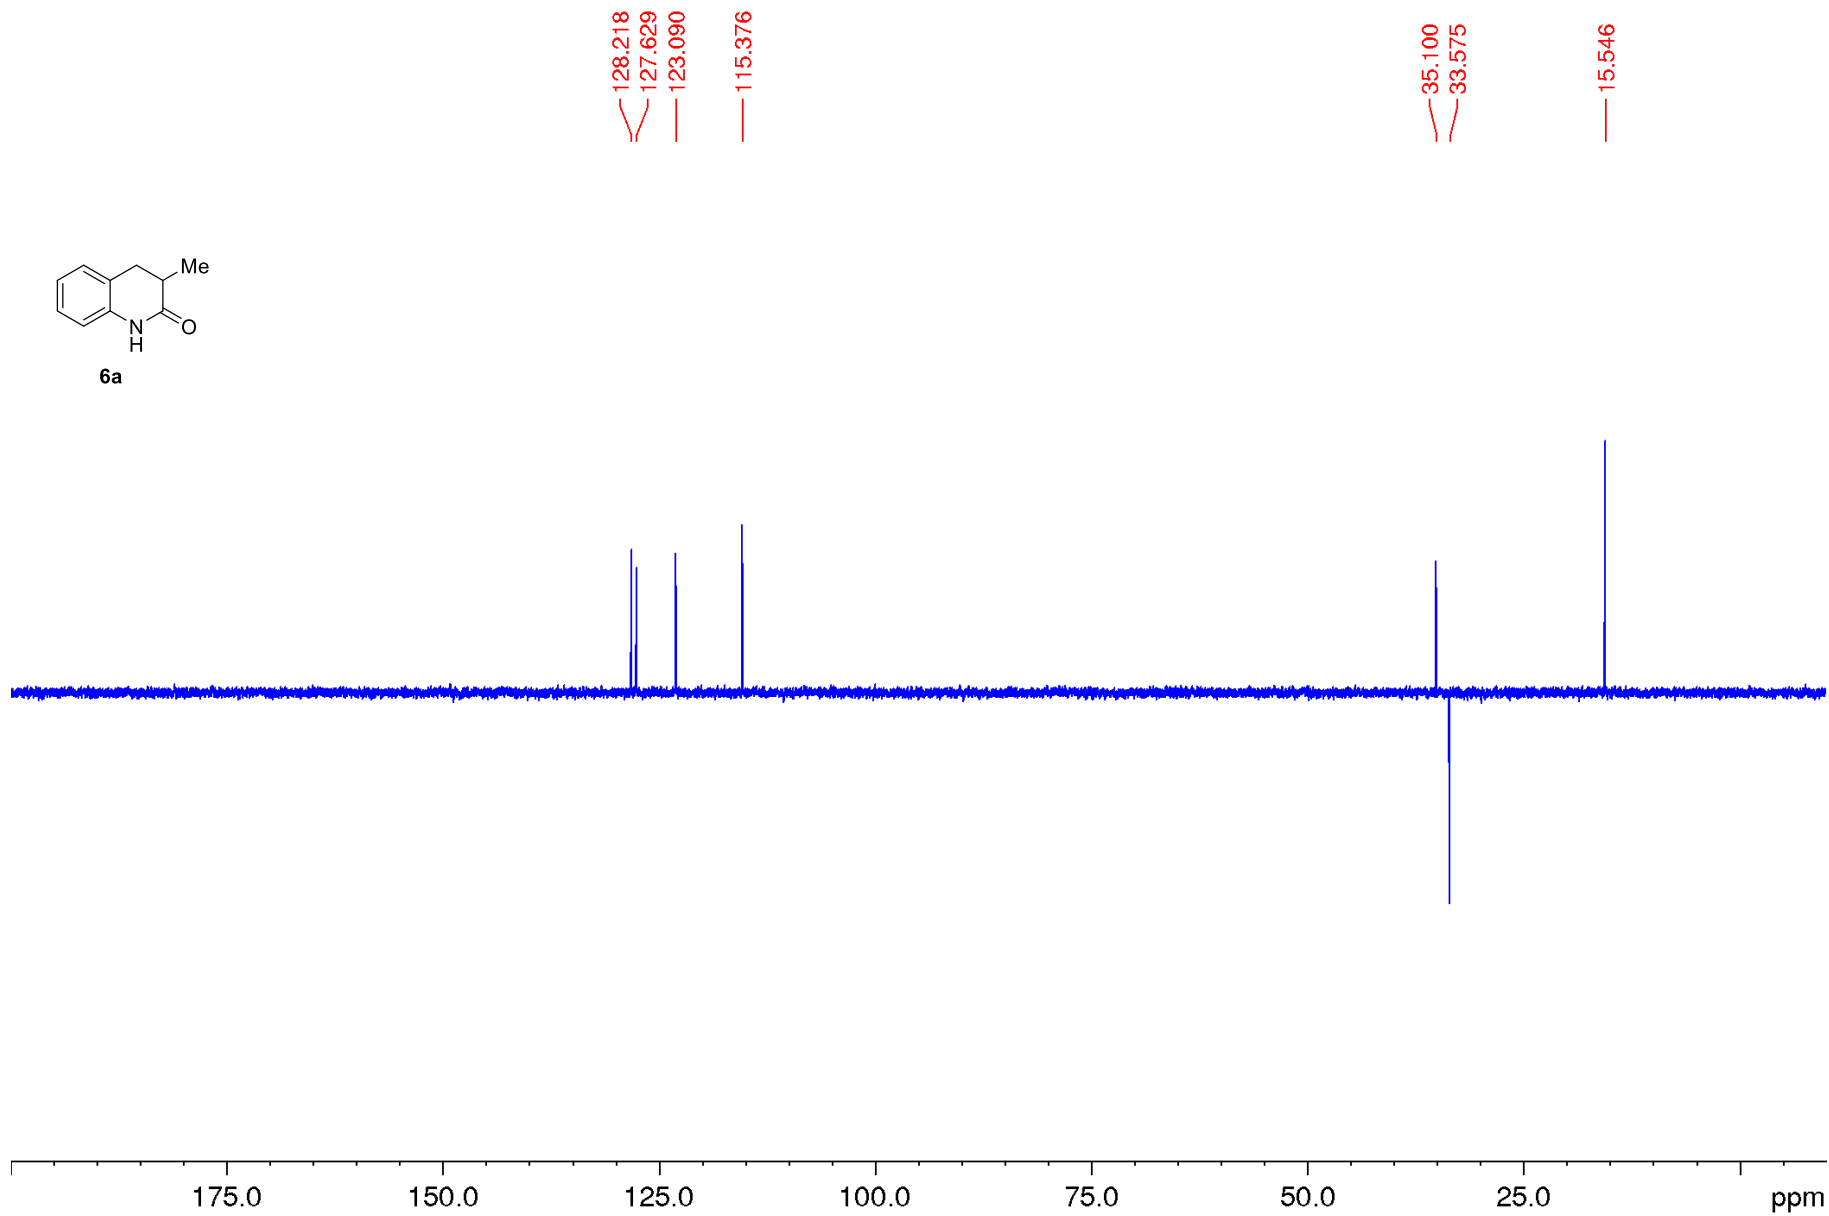

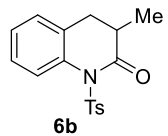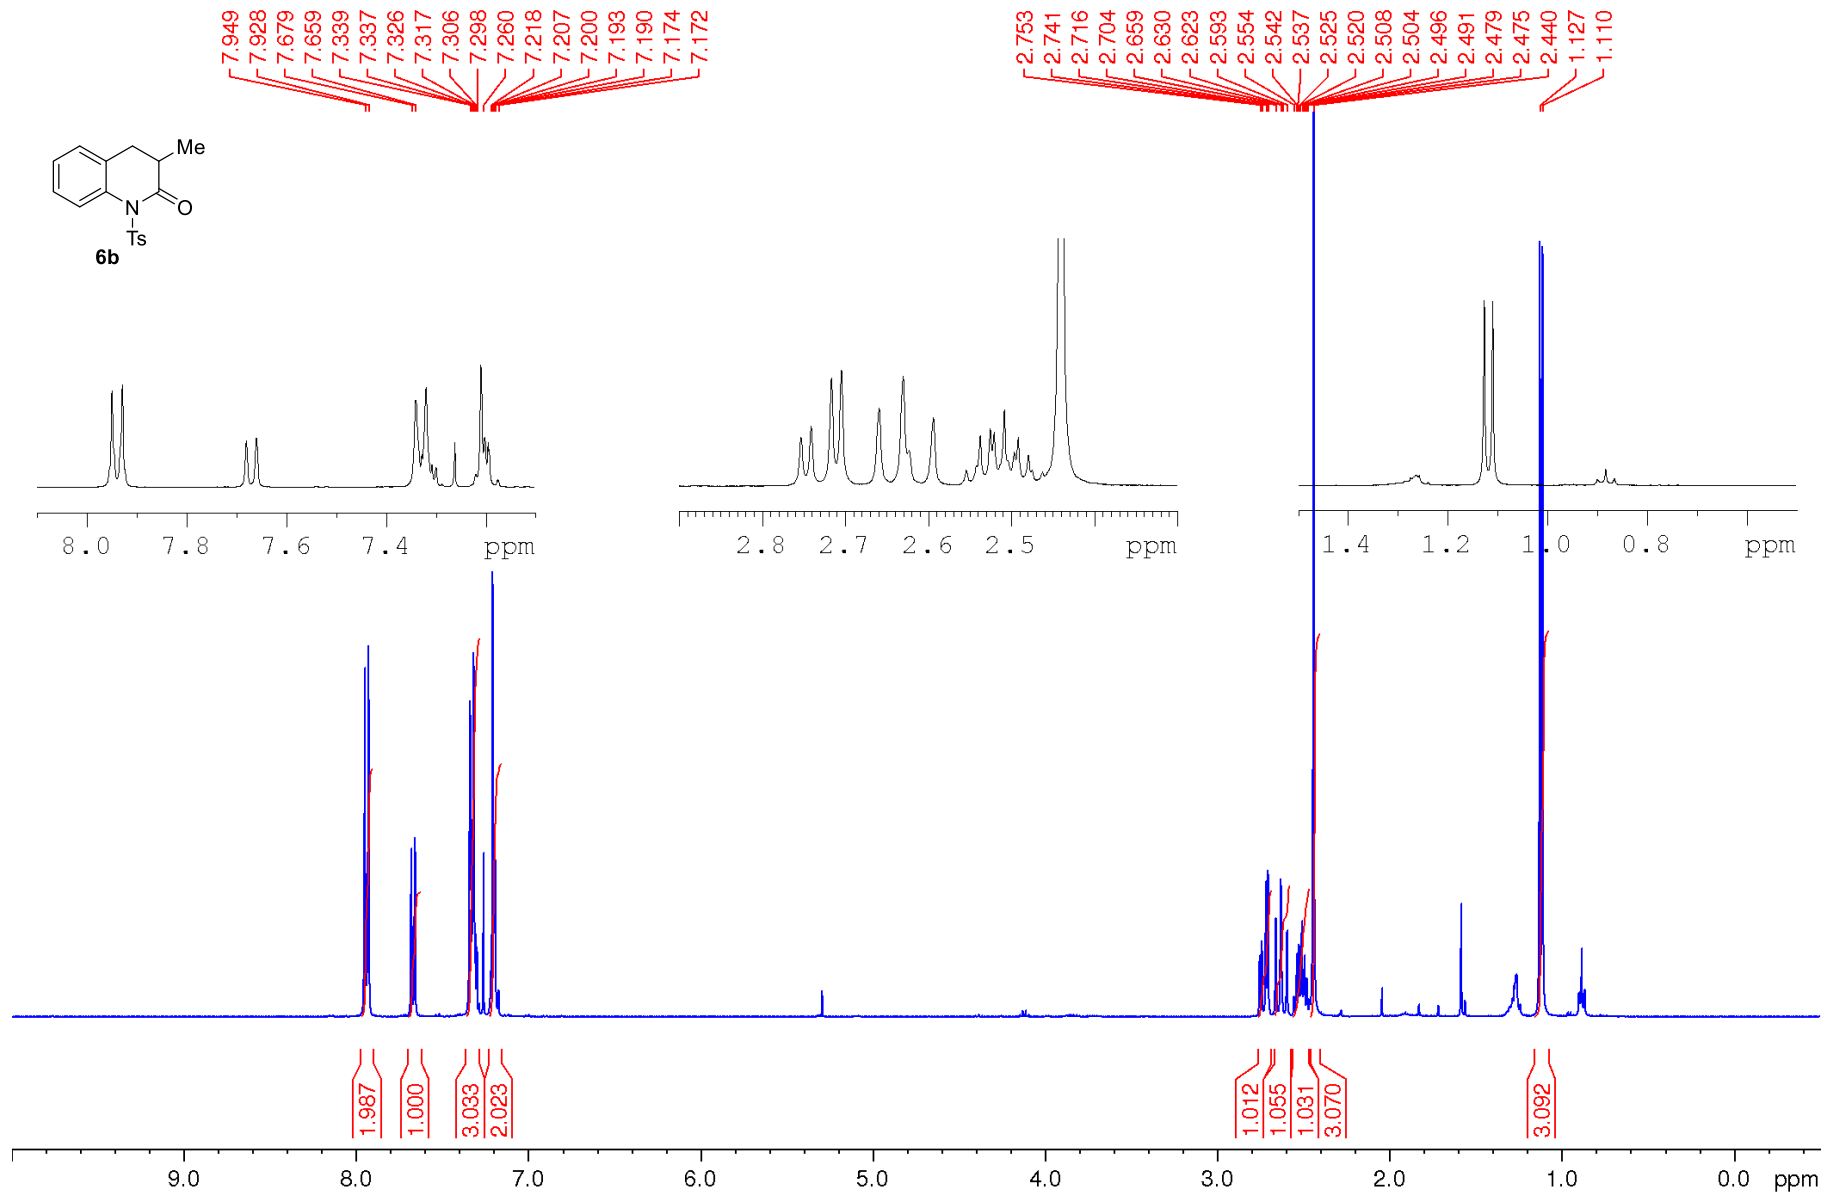

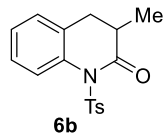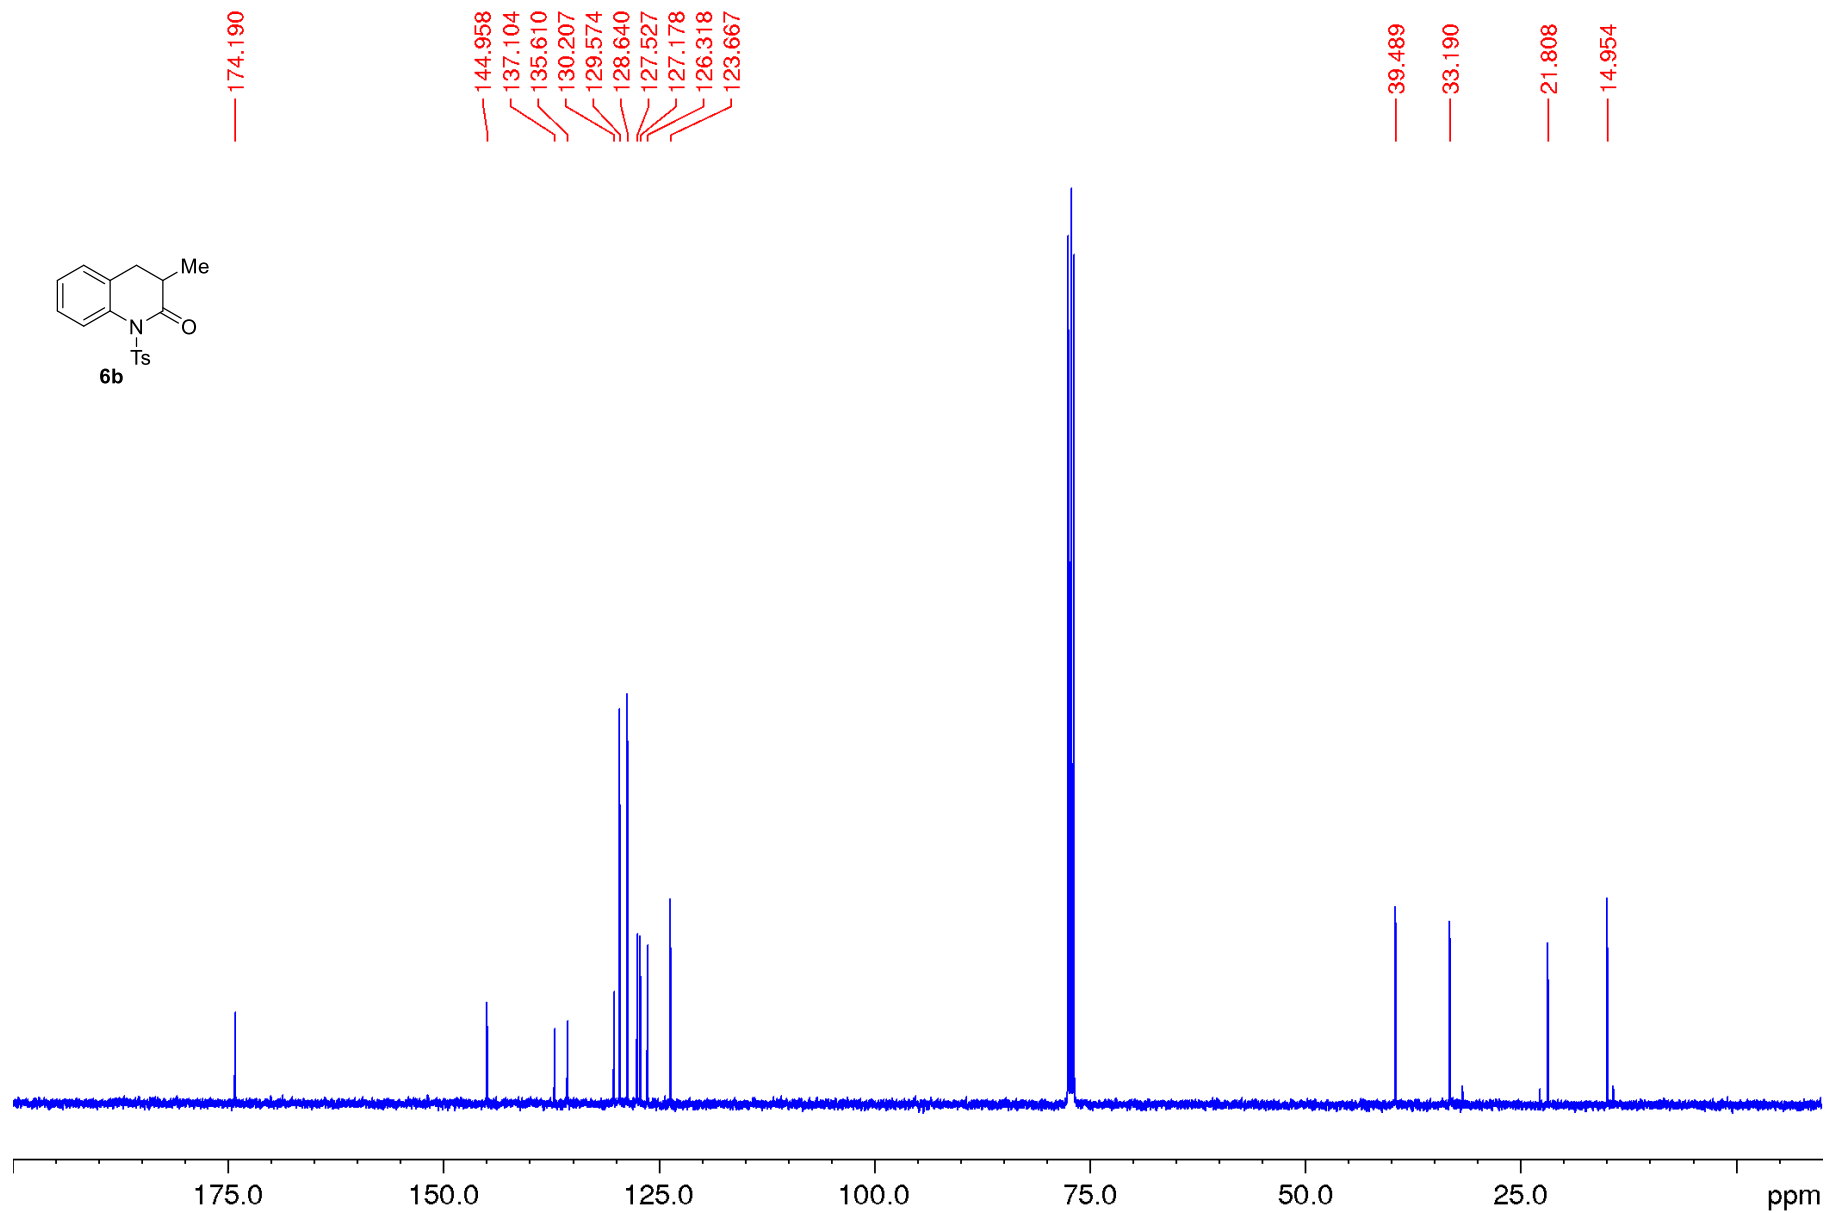

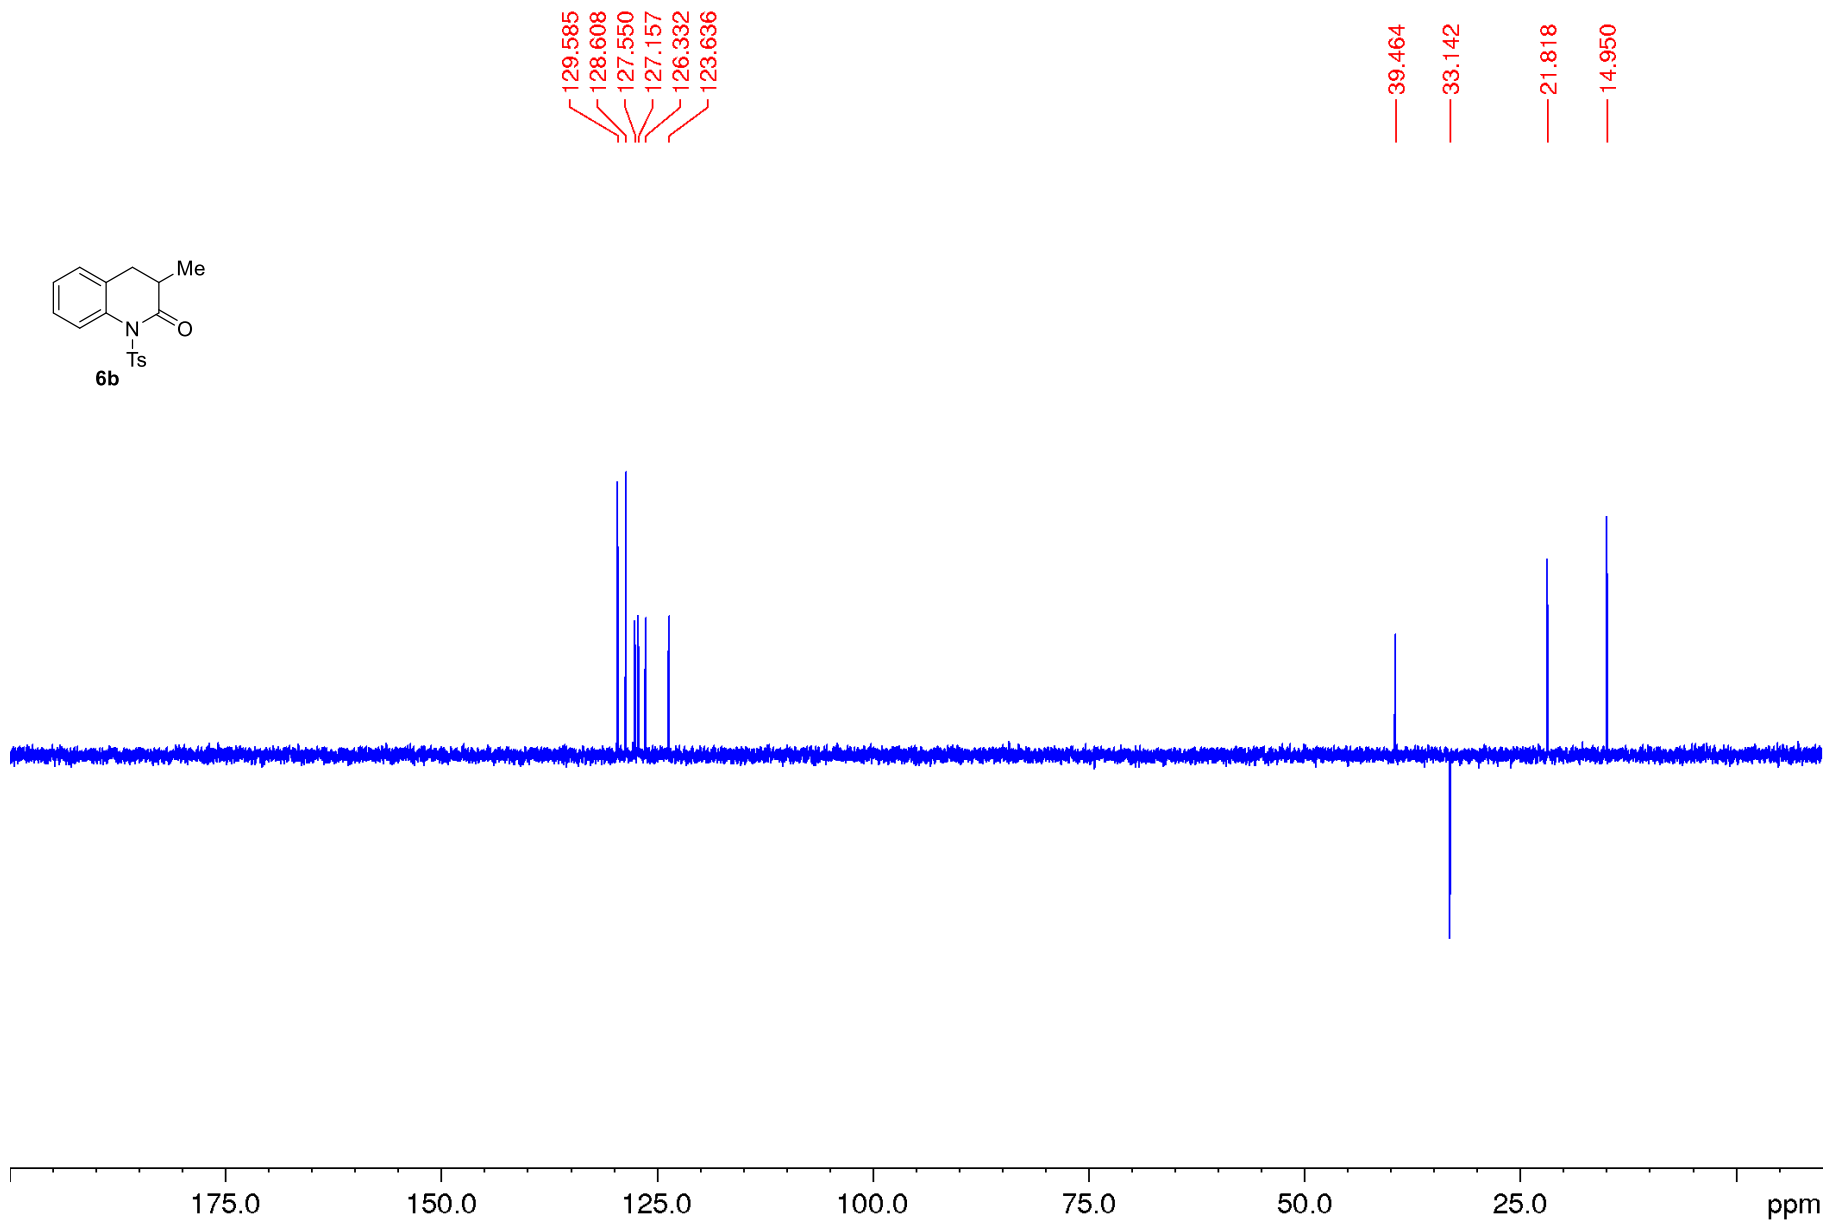

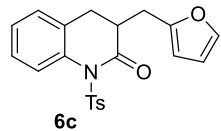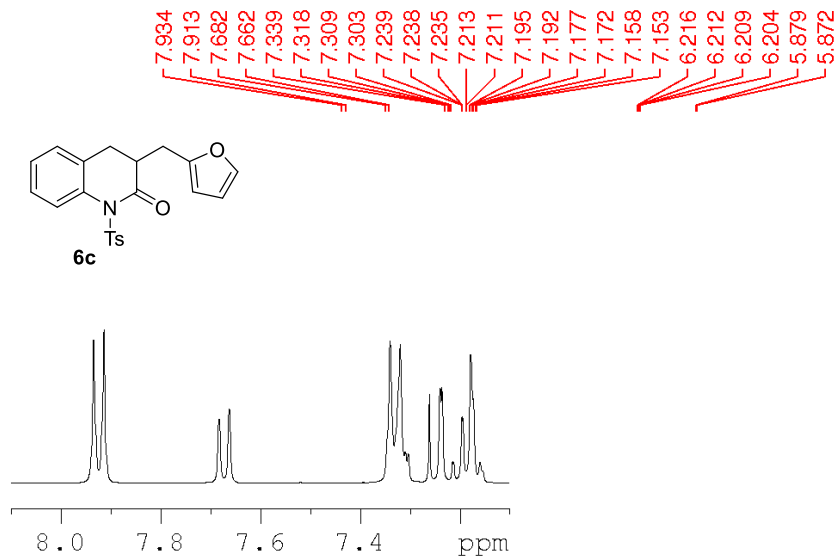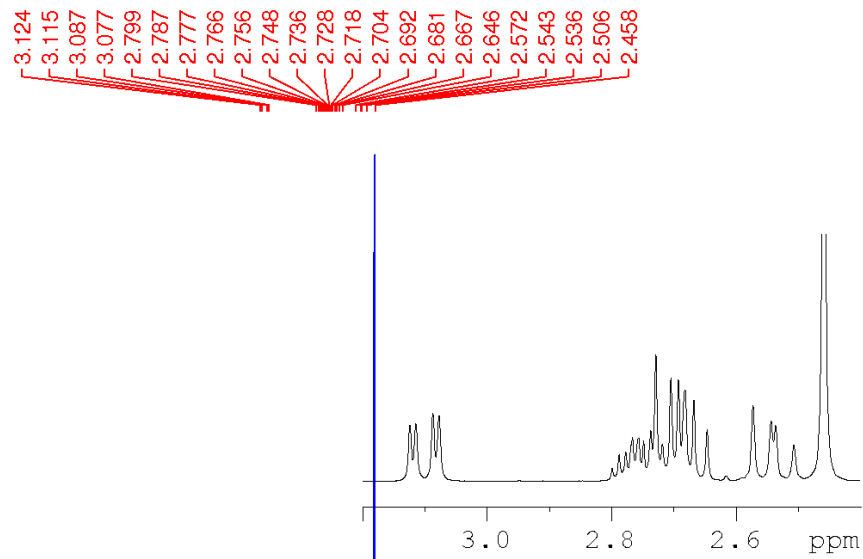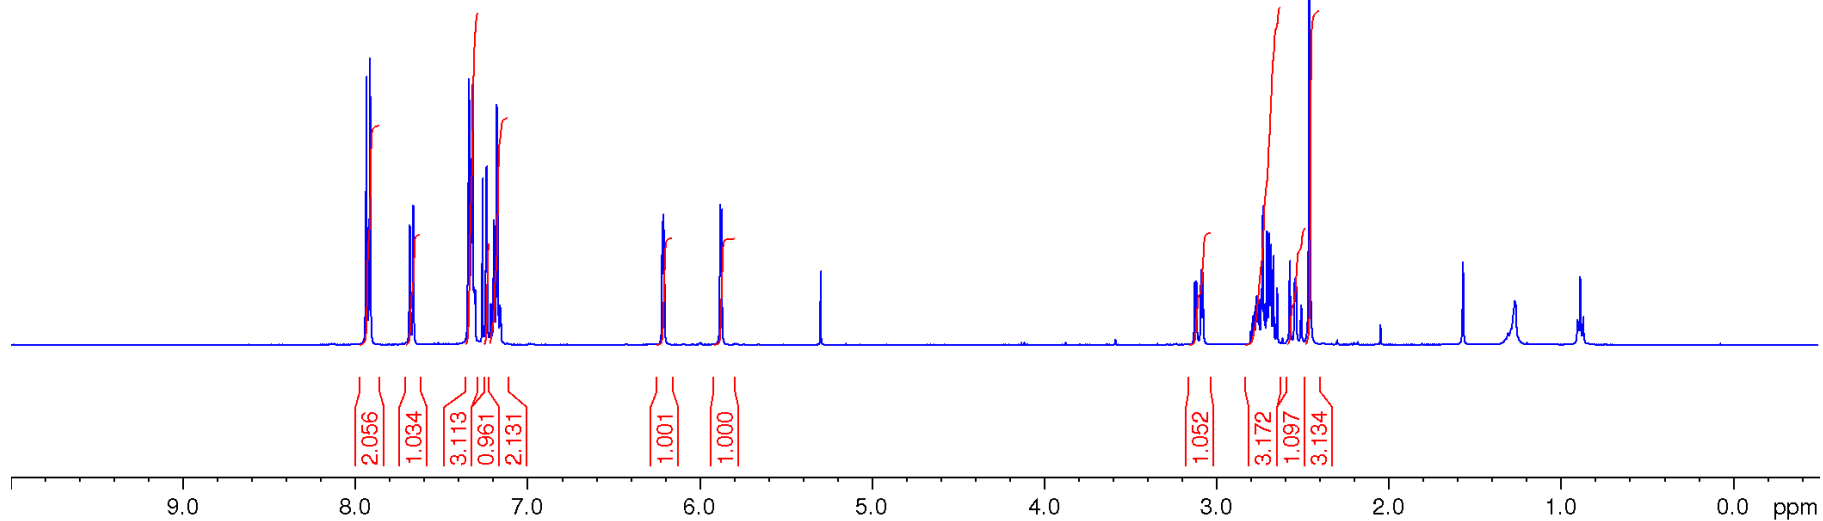

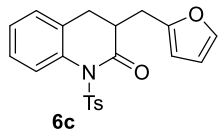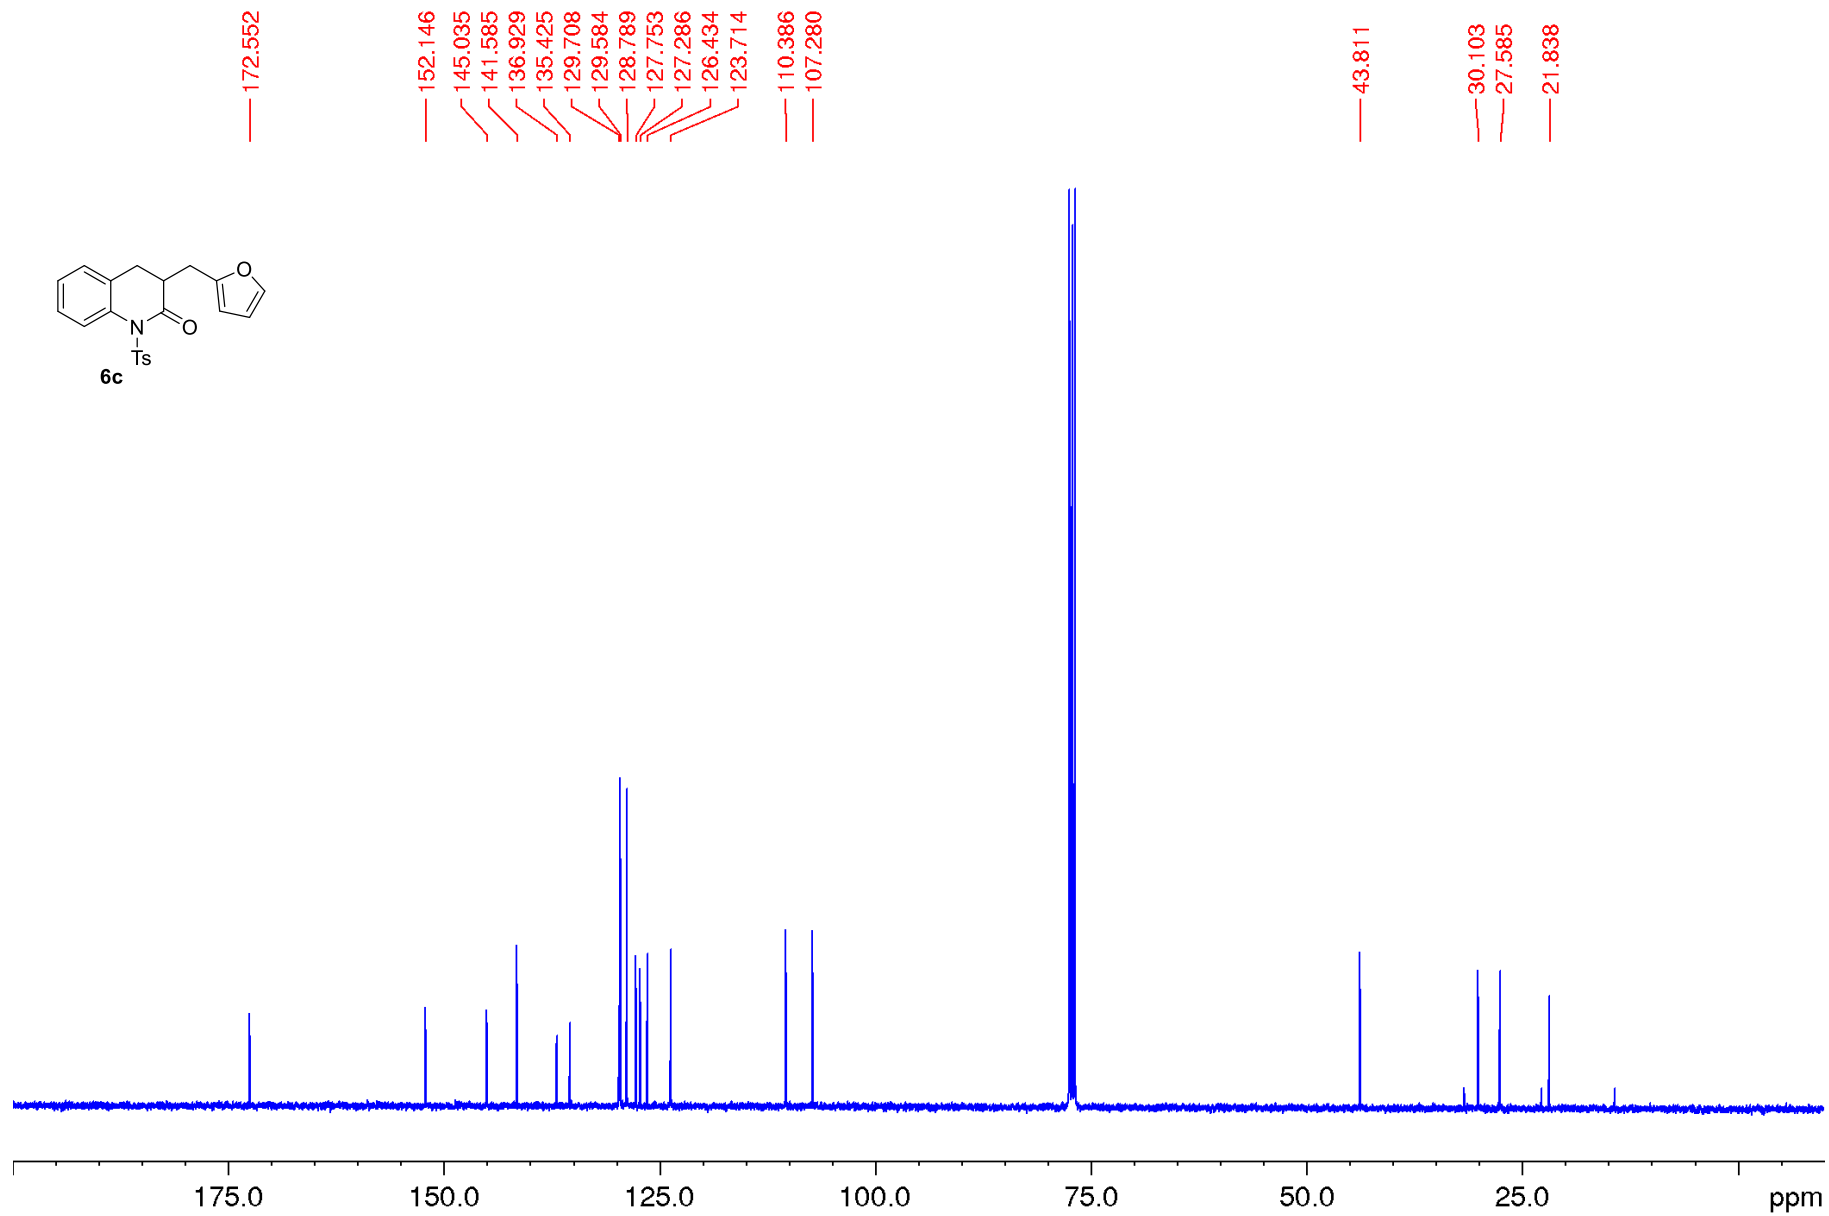

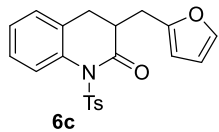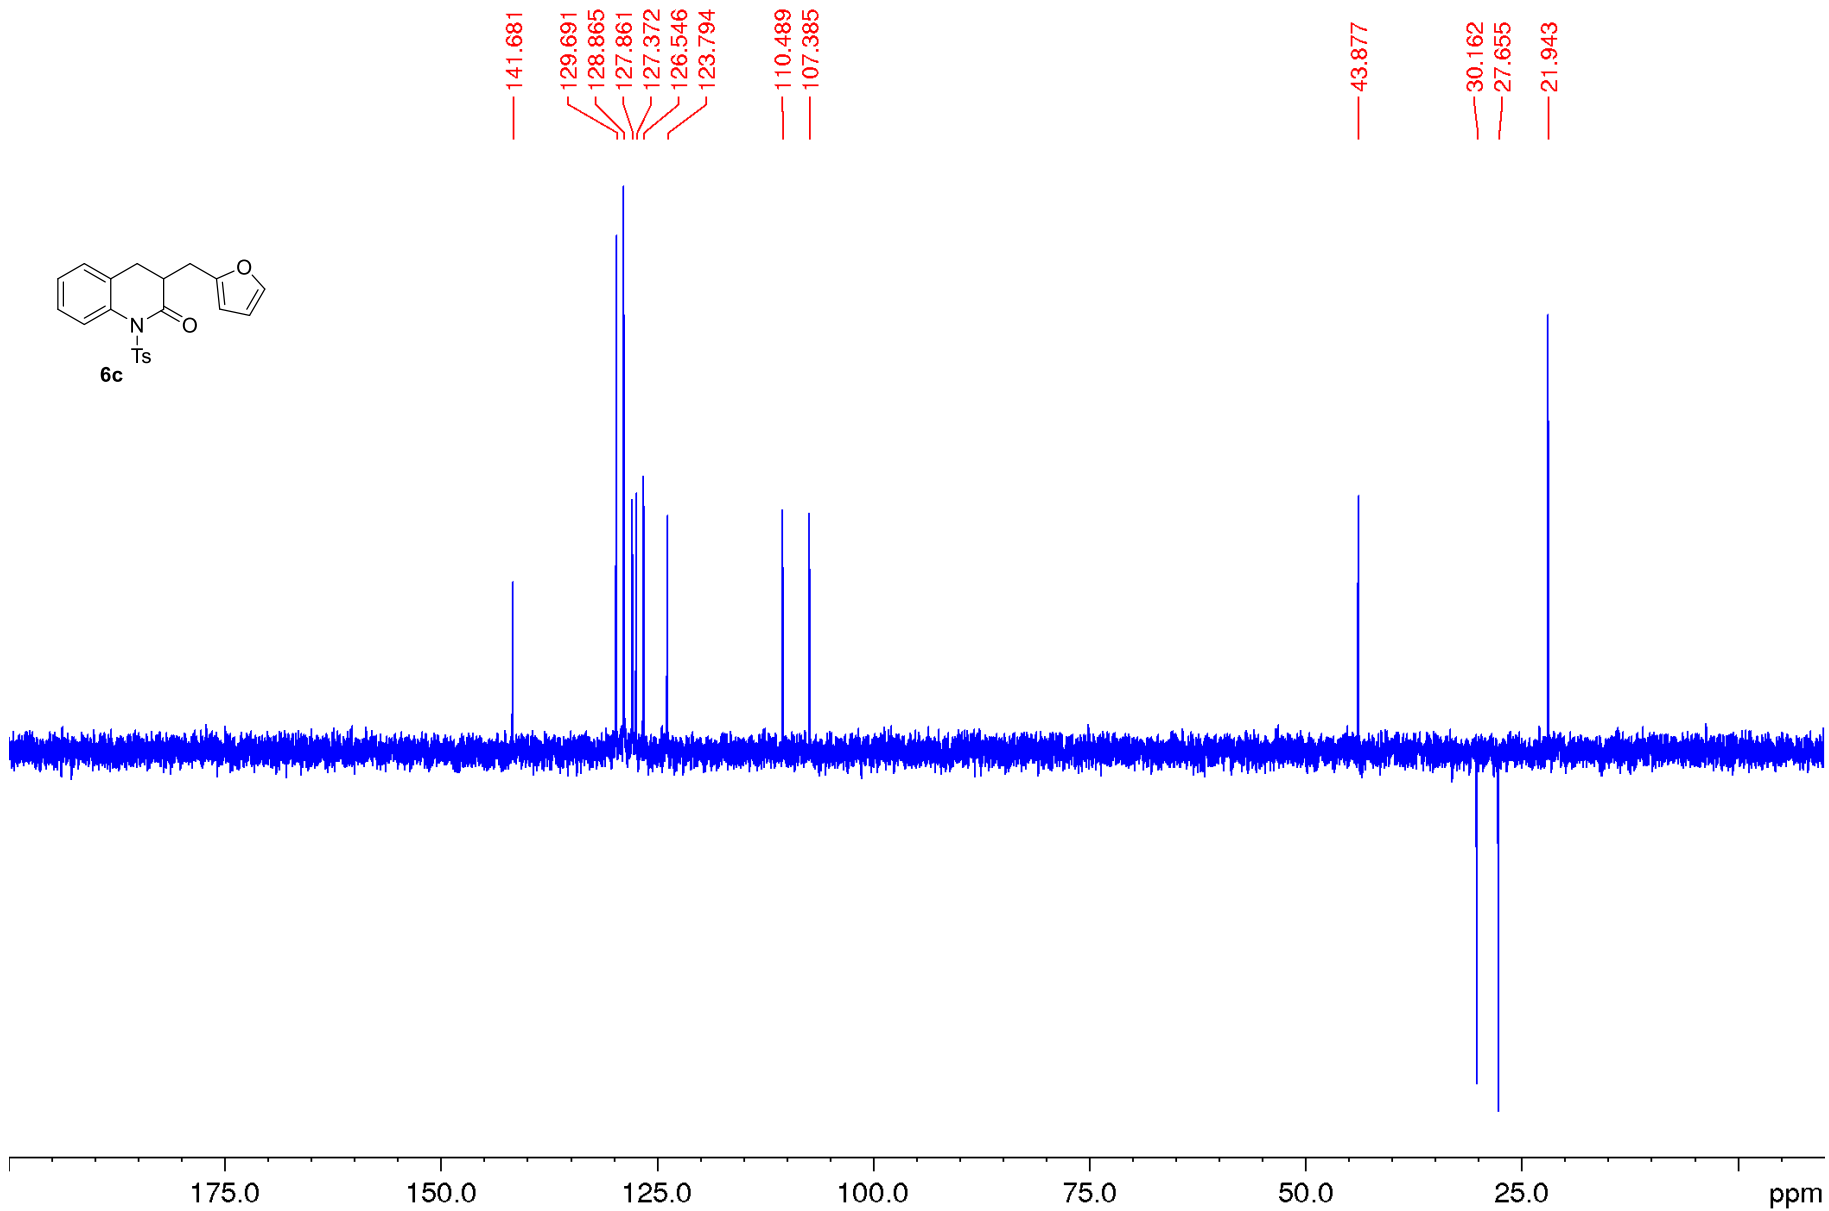



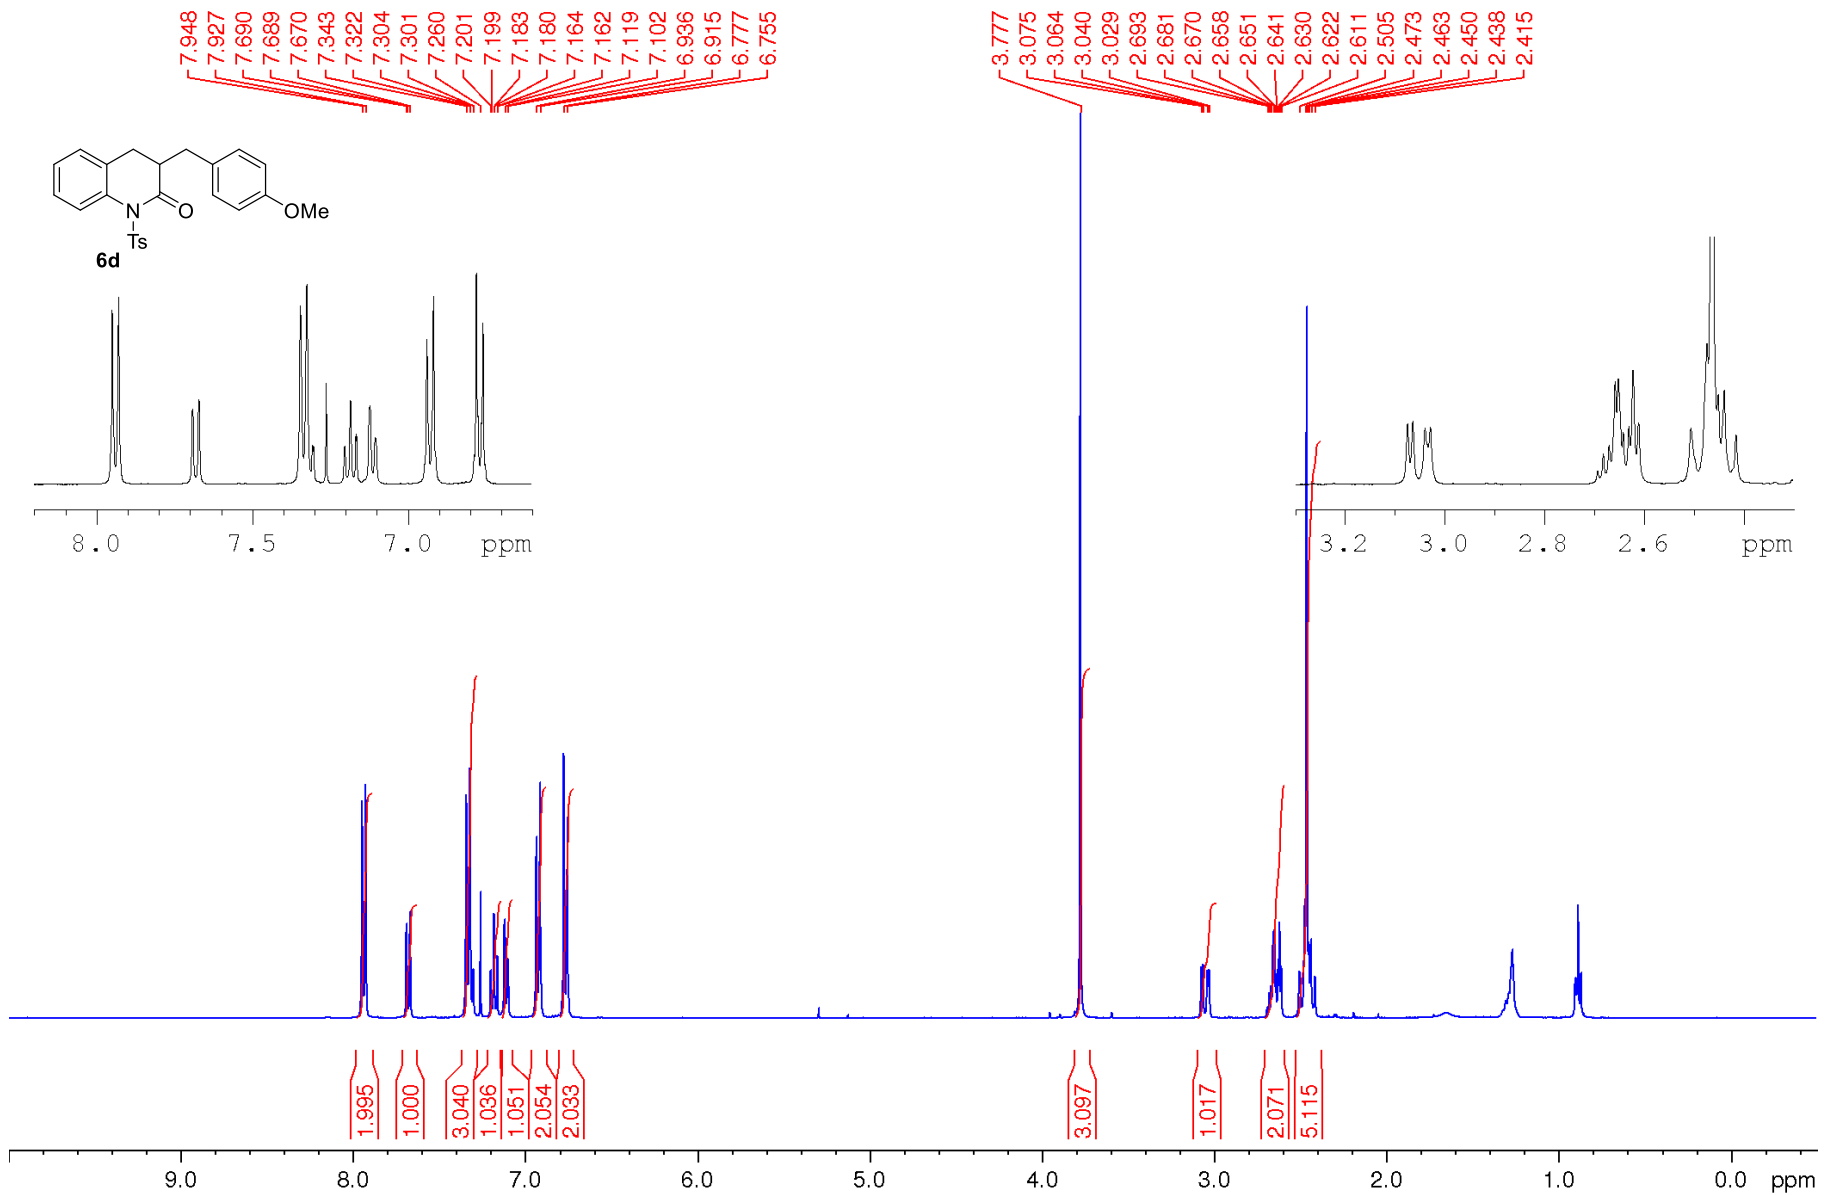

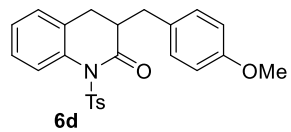

173.180  
158.402  
145.029  
137.015  
135.497  
130.153  
130.133  
129.585  
129.550  
128.749  
127.909  
127.217  
126.356  
123.571  
114.040  
55.354  
46.106  
33.977  
29.404  
21.840

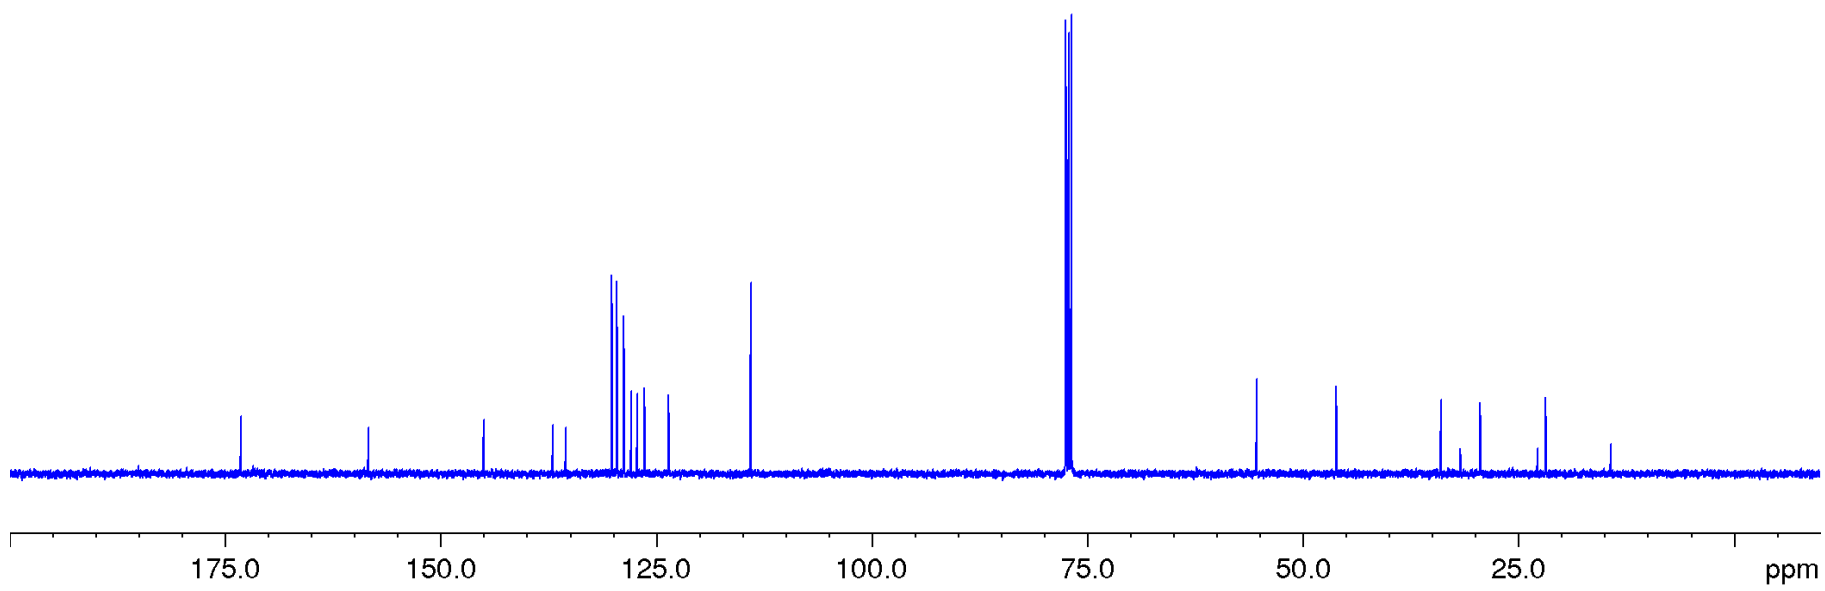

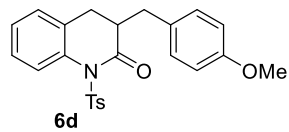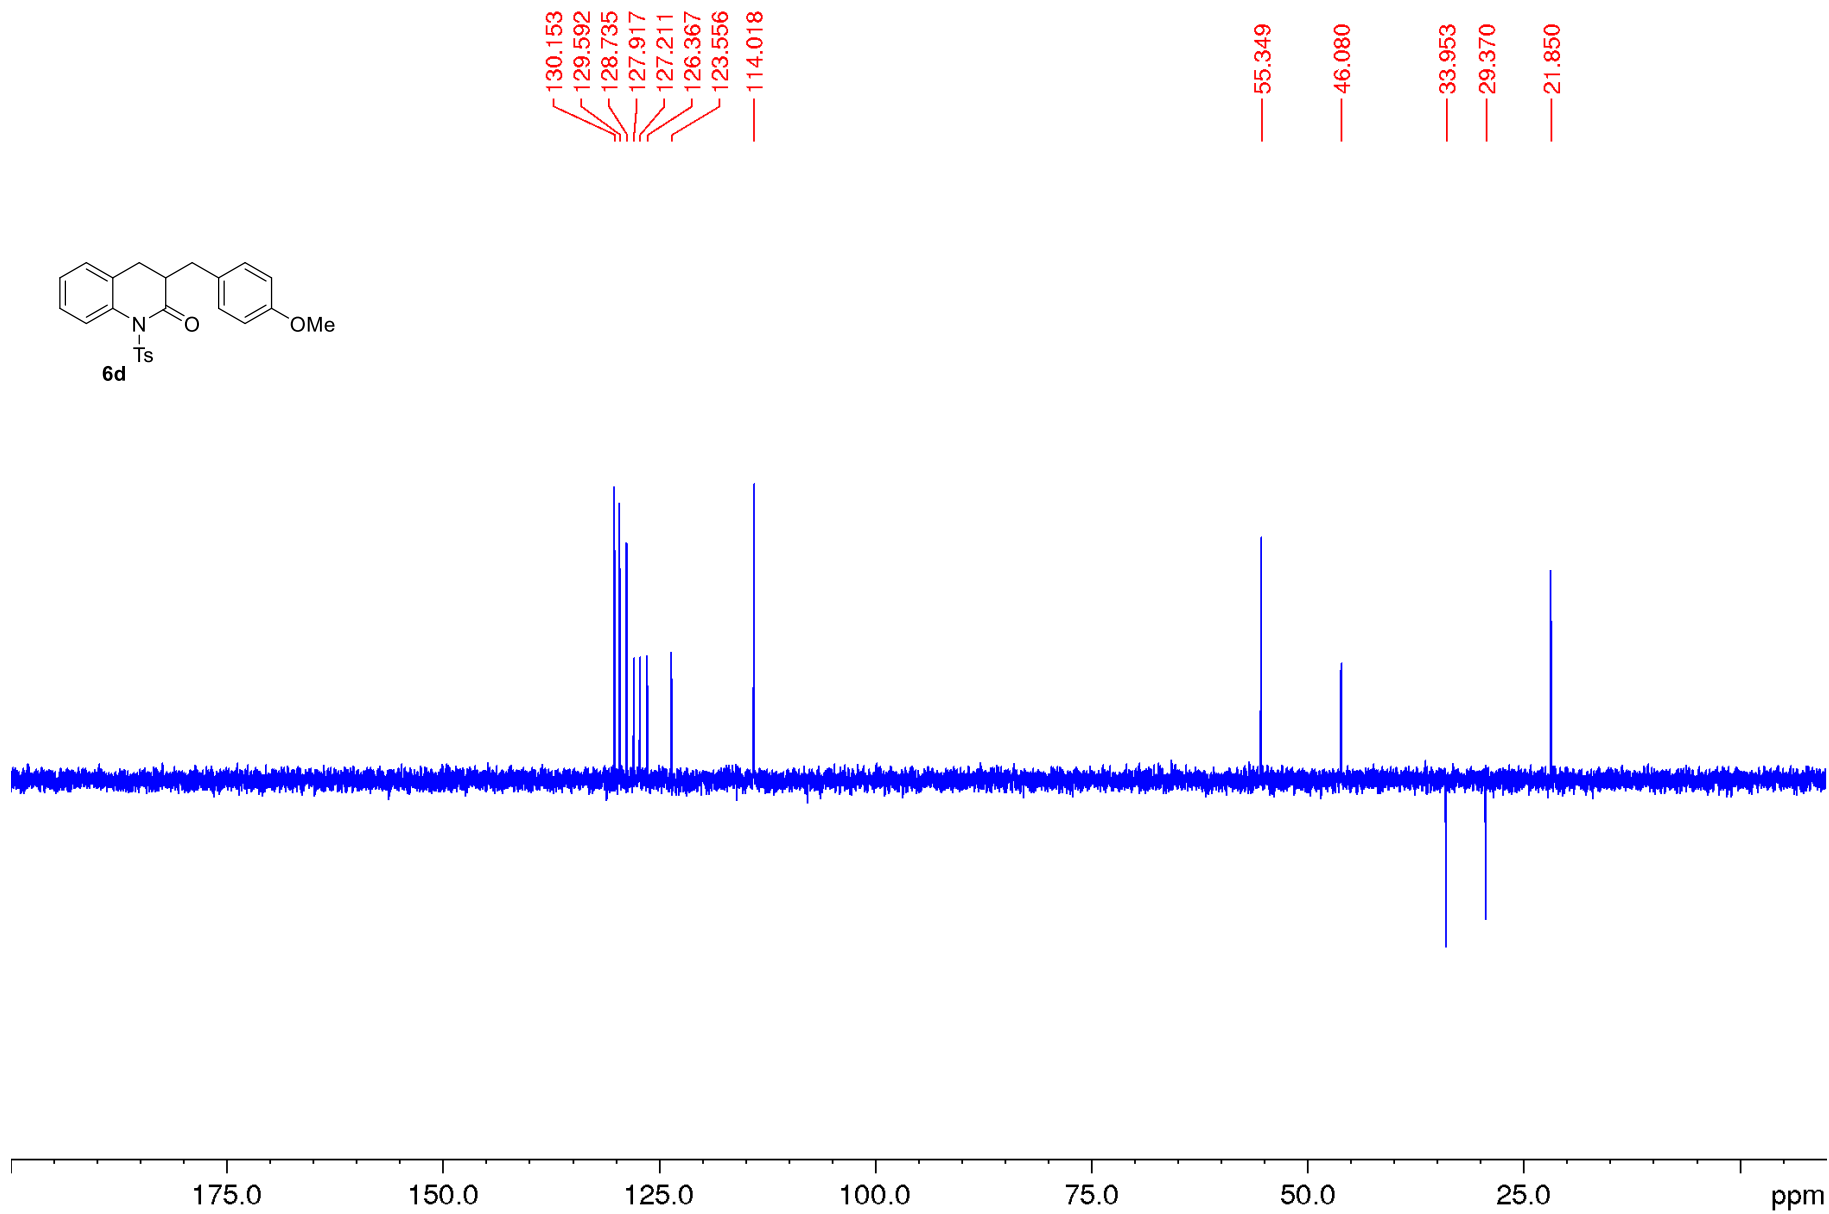

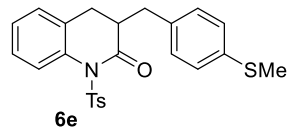

7.940  
7.919  
7.690  
7.669  
7.341  
7.321  
7.302  
7.201  
7.182  
7.164  
7.127  
7.122  
7.107  
6.947  
6.926

3.086  
3.076  
3.052  
3.041  
2.703  
2.691  
2.680  
2.667  
2.648  
2.628  
2.615  
2.604  
2.513  
2.504  
2.490  
2.477  
2.465  
2.455

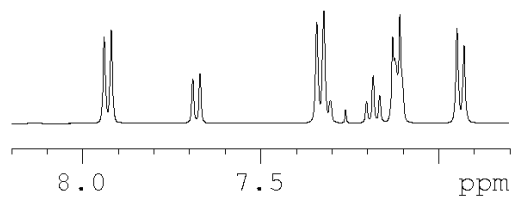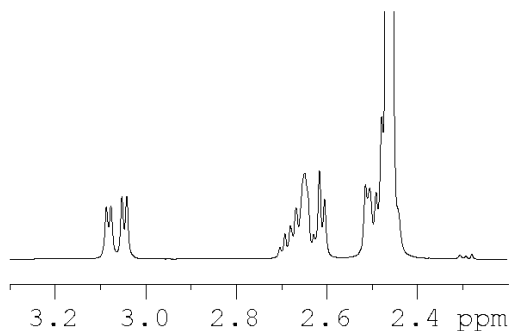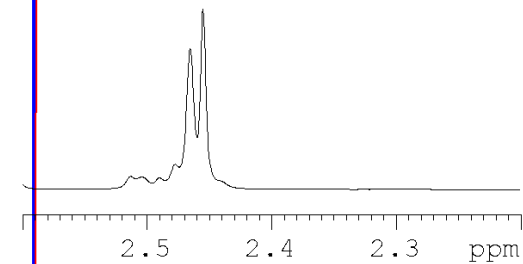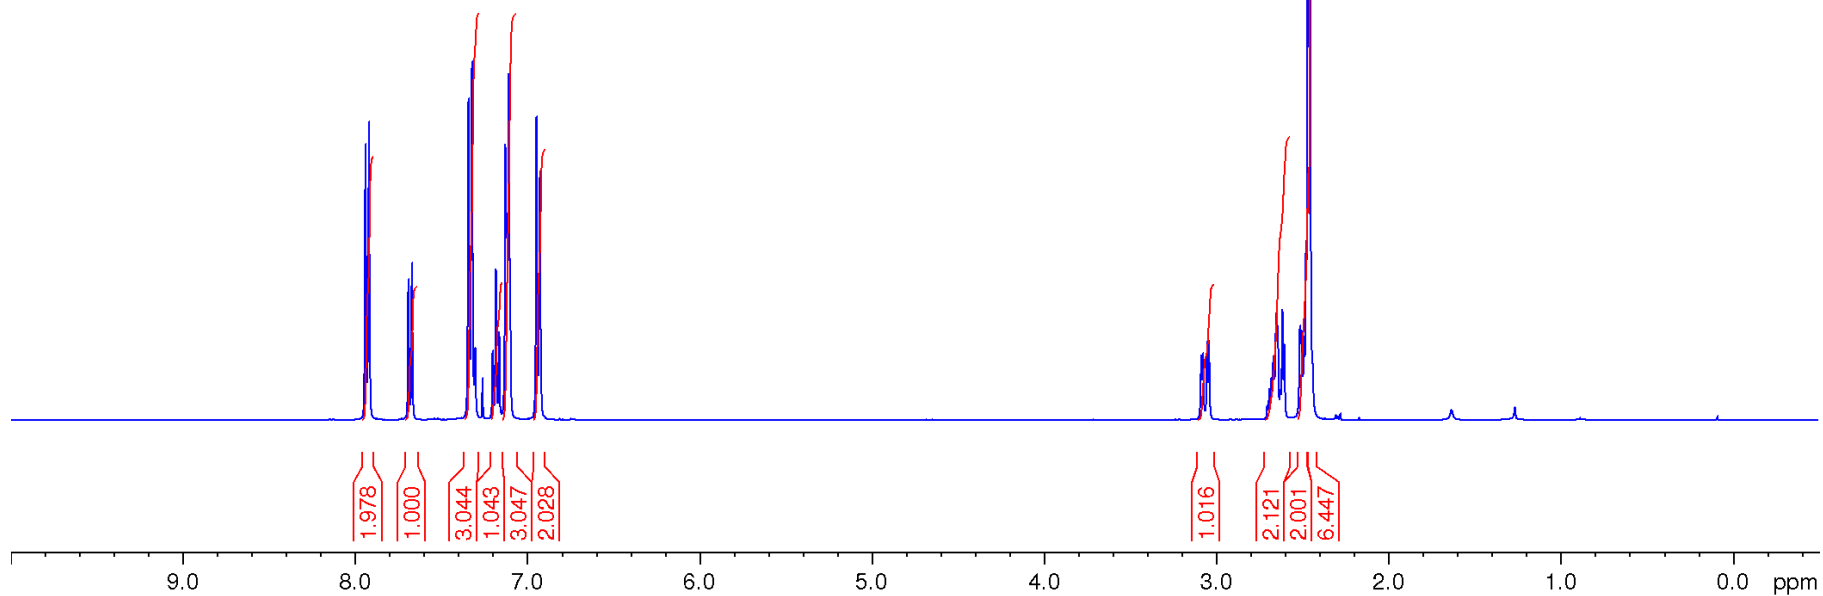

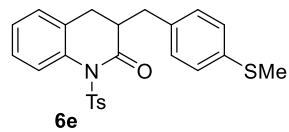

173.036

145.148  
136.957  
136.618  
135.467  
135.073  
129.754  
129.647  
129.524  
128.774  
127.925  
127.306  
126.972  
126.460  
123.640

45.886

34.361

29.495

21.912

16.107

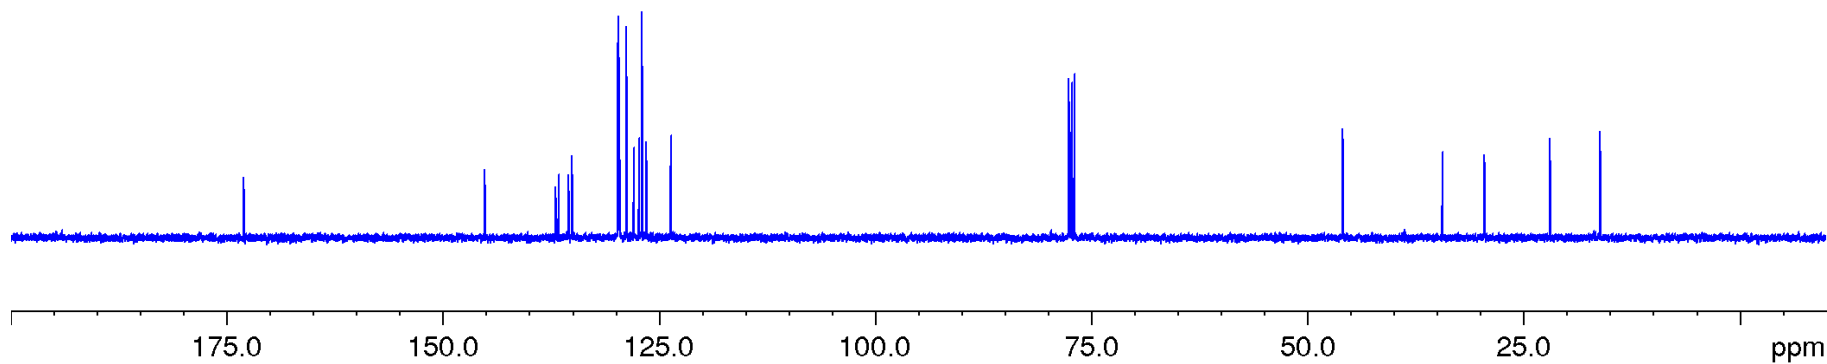



129.750  
129.644  
128.771  
127.920  
127.302  
126.968  
126.456  
123.636

45.882  
34.357  
29.492  
21.909  
16.103

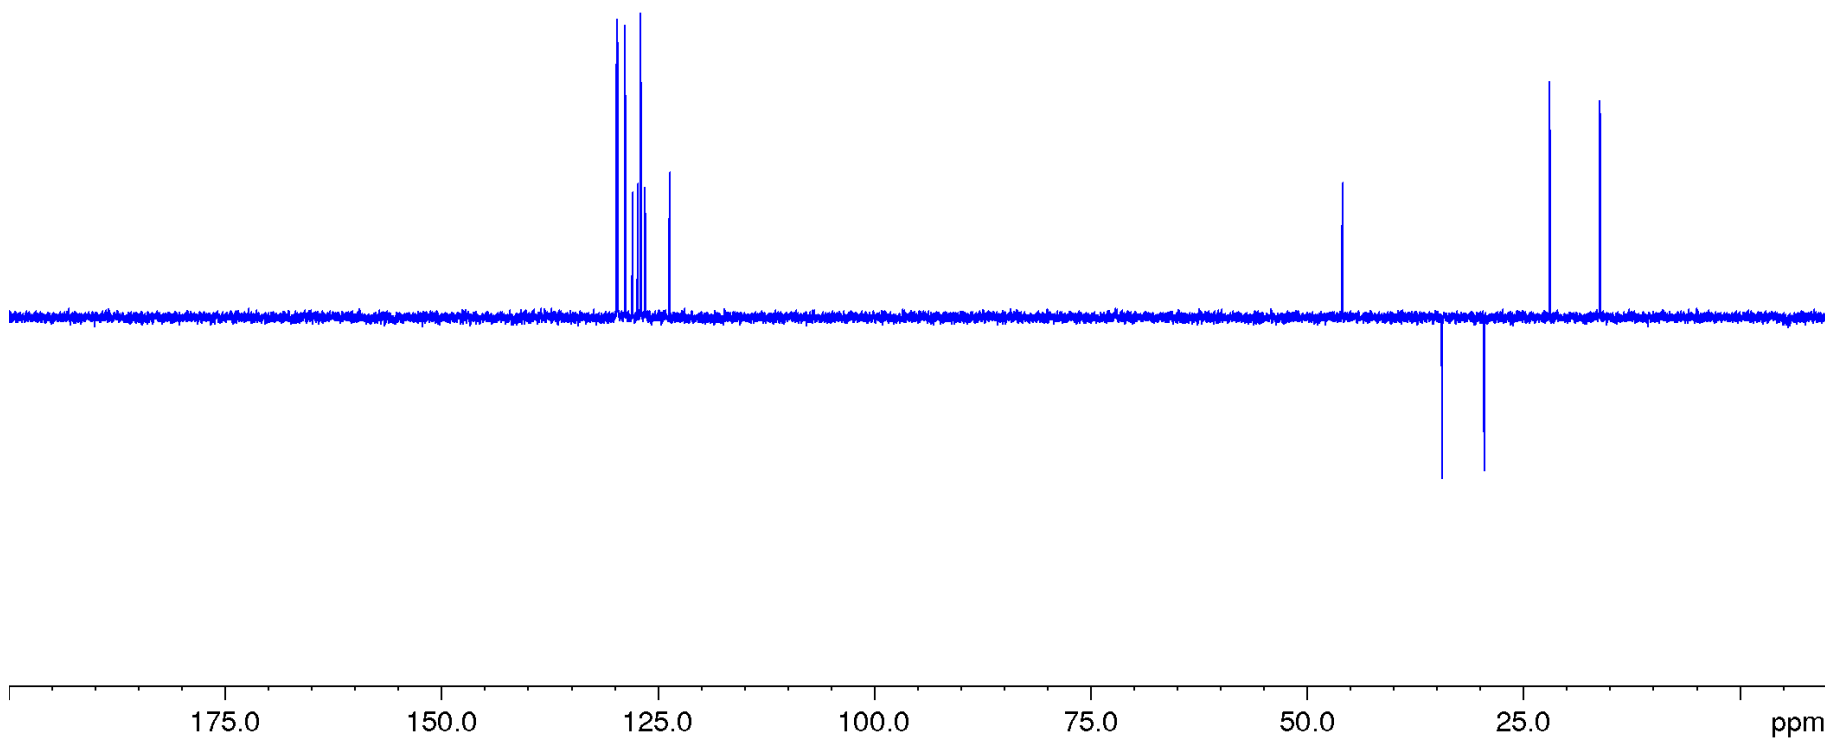

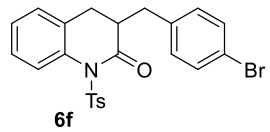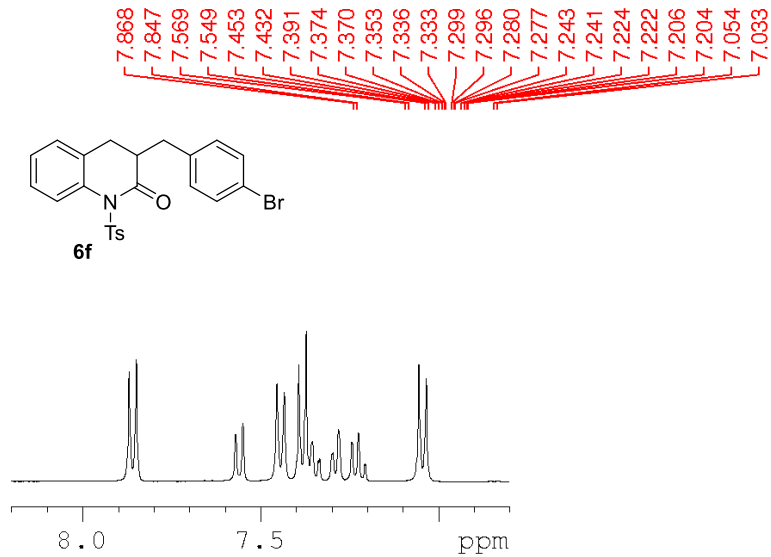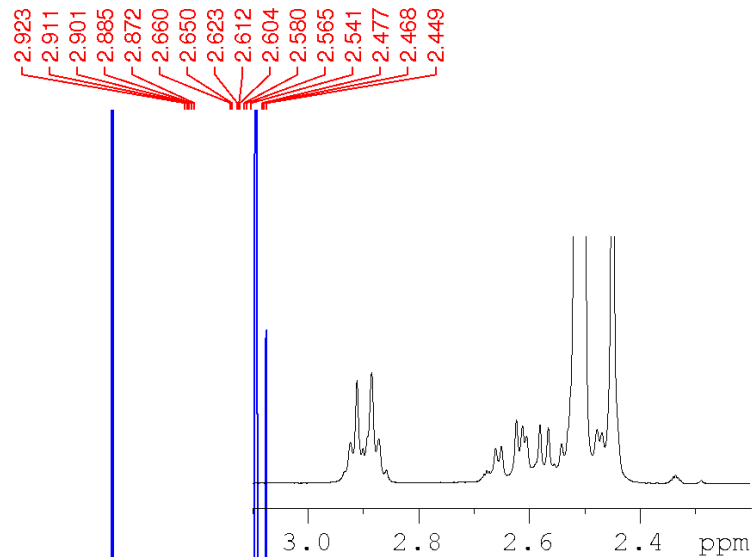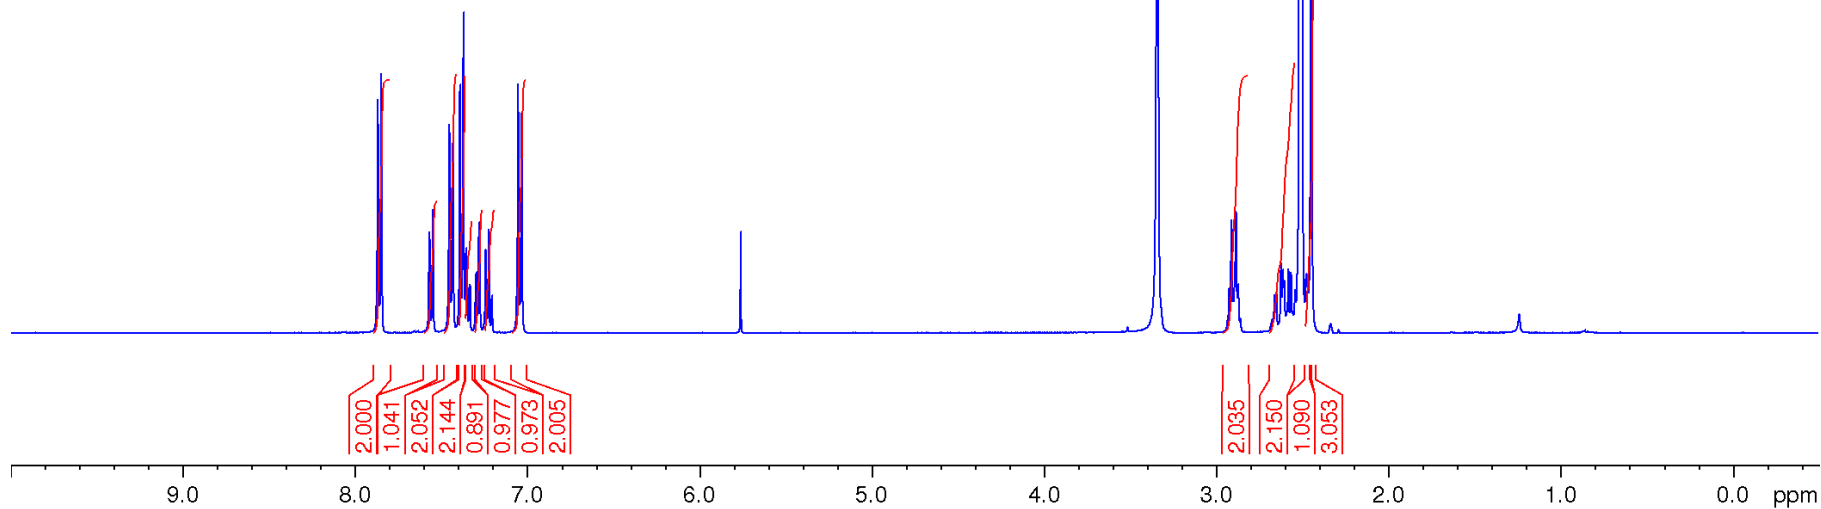

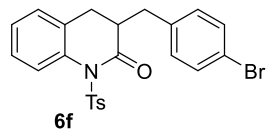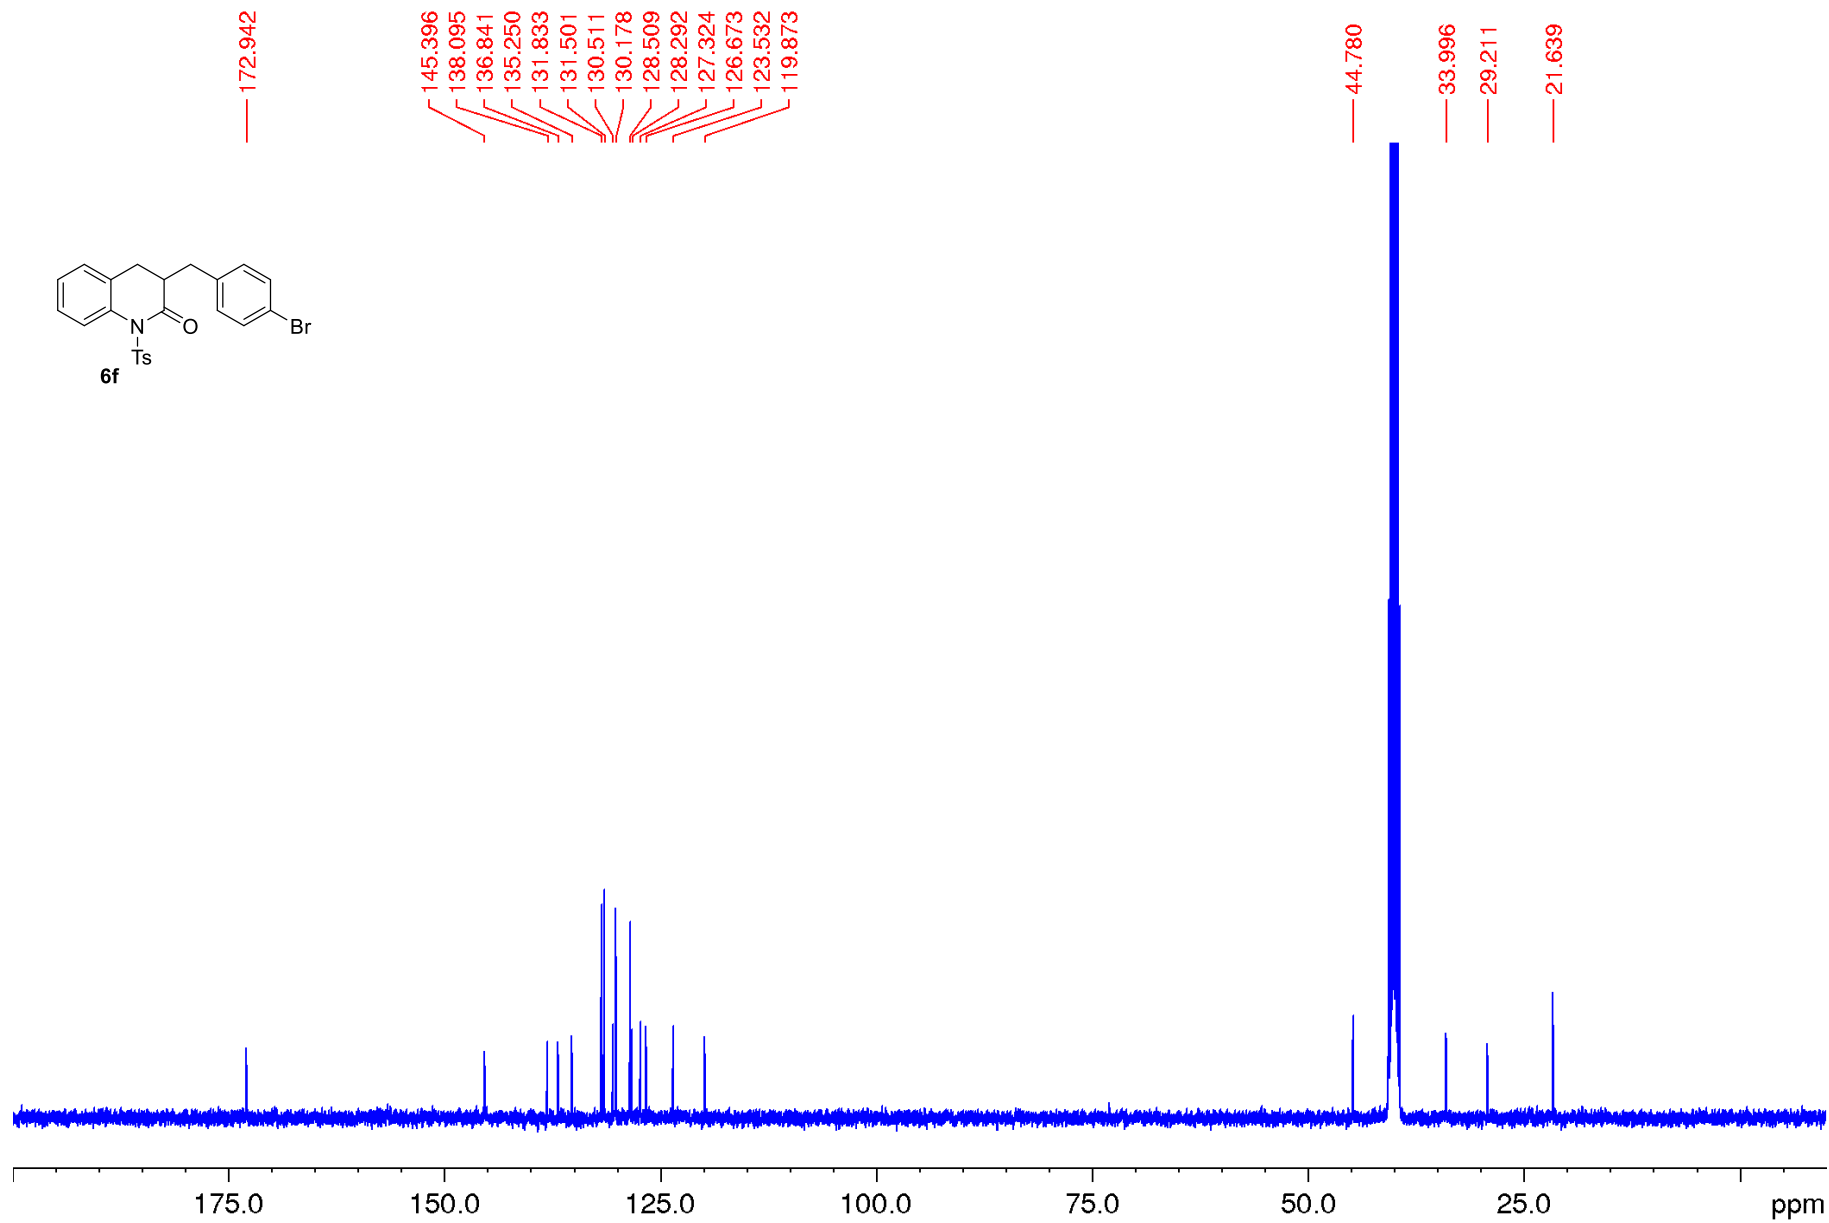





131.830  
131.501  
130.175  
128.514  
128.286  
127.923  
126.668  
123.533

44.781

33.999

29.212

21.643

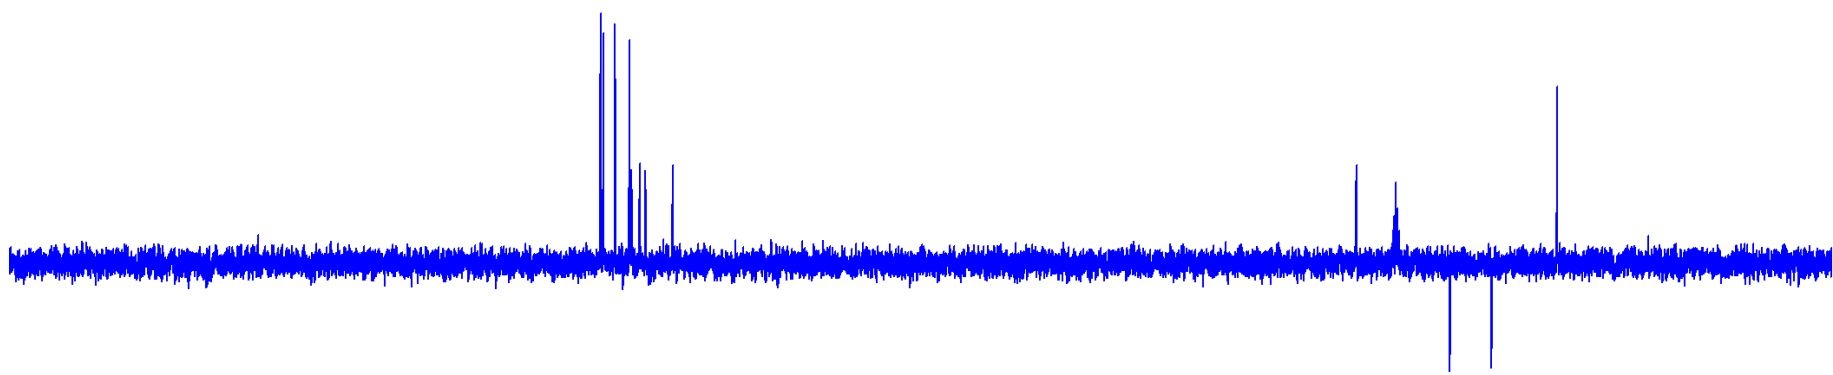

175.0

150.0

125.0

100.0

75.0

50.0

25.0

ppm

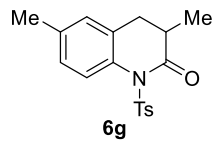

7.929  
7.908  
7.557  
7.536  
7.328  
7.308  
7.129  
7.108  
7.011

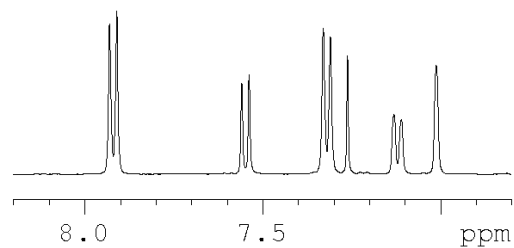

2.692  
2.680  
2.656  
2.644  
2.606  
2.577  
2.541  
2.515  
2.503  
2.500  
2.487  
2.471  
2.458  
2.435  
2.347  
1.110  
1.093

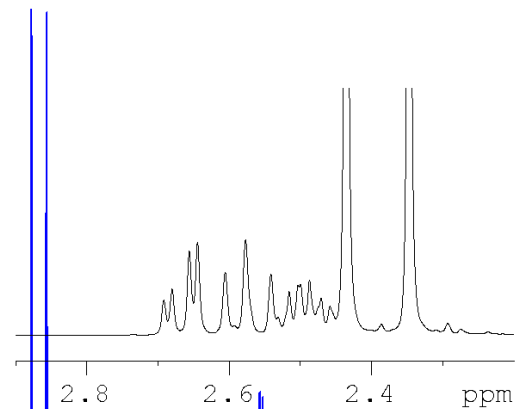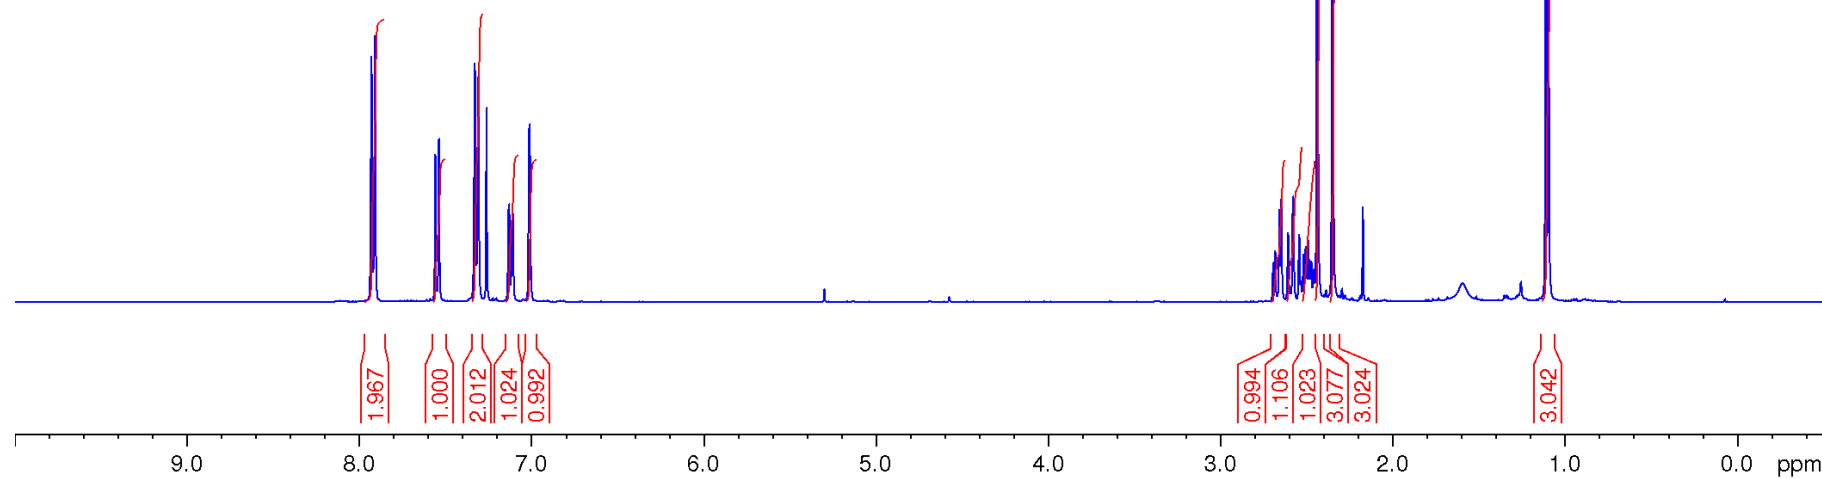

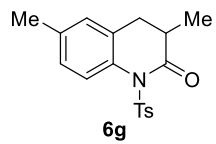

174.393

144.986

137.192

136.345

133.195

130.145

129.647

128.718

128.245

127.844

123.646

39.643

33.268

21.924

21.112

15.041

175.0

150.0

125.0

100.0

75.0

50.0

25.0

ppm

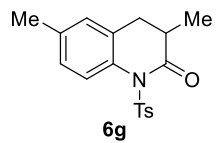

129.636  
128.708  
128.234  
127.833  
123.635

39.635

33.260

21.915

21.103

15.036

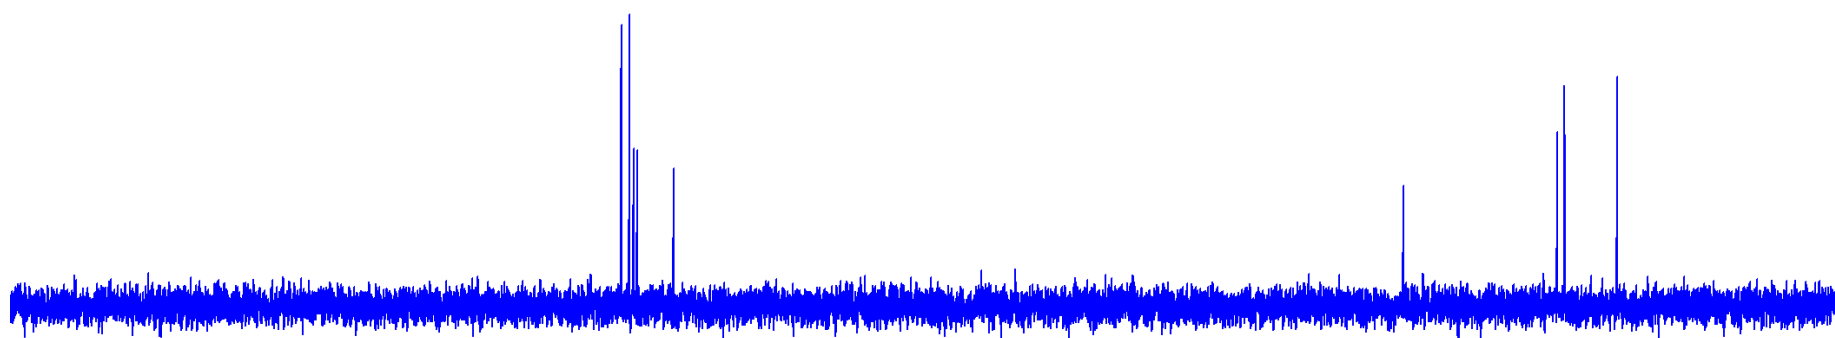

175.0

150.0

125.0

100.0

75.0

50.0

25.0

ppm

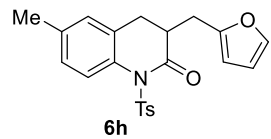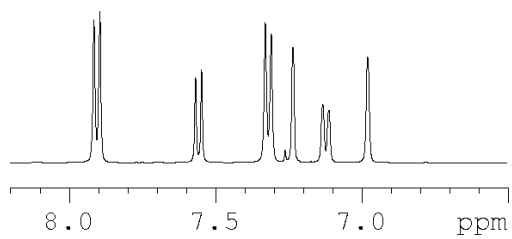

7.913  
 7.893  
 7.565  
 7.545  
 7.327  
 7.307  
 7.232  
 7.130  
 7.110  
 6.977

6.208  
 5.881  
 5.873

3.117  
 3.108  
 3.081  
 3.071  
 2.768  
 2.757  
 2.747  
 2.736  
 2.726  
 2.717  
 2.706  
 2.697  
 2.685  
 2.673  
 2.663  
 2.649  
 2.636  
 2.626  
 2.523  
 2.493  
 2.488  
 2.448  
 2.332

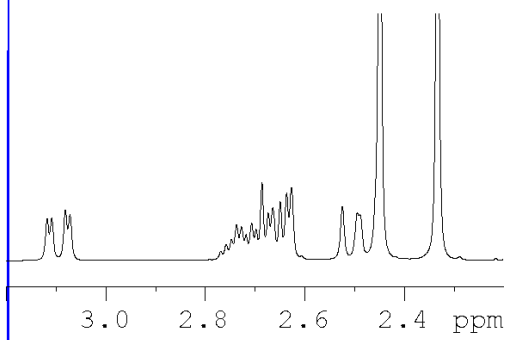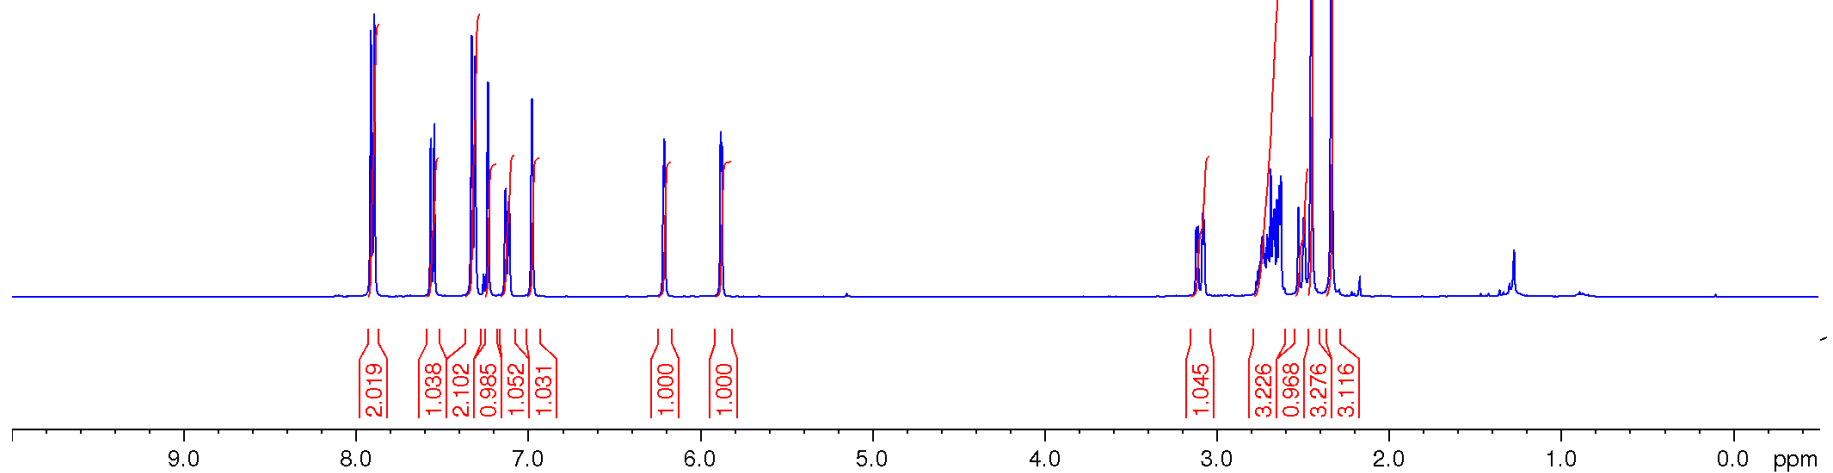

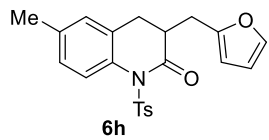

172.630

152.212

144.987

141.547

136.904

136.385

132.907

129.604

129.561

128.716

128.341

127.827

123.592

110.398

107.232

43.843

30.070

27.558

21.832

21.000

175.0

150.0

125.0

100.0

75.0

50.0

25.0

ppm

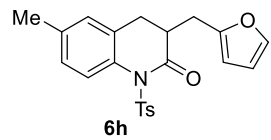

141.552  
129.566  
128.721  
128.346  
127.832  
123.597  
110.403  
107.237  
43.848  
30.075  
27.563  
21.837  
21.005

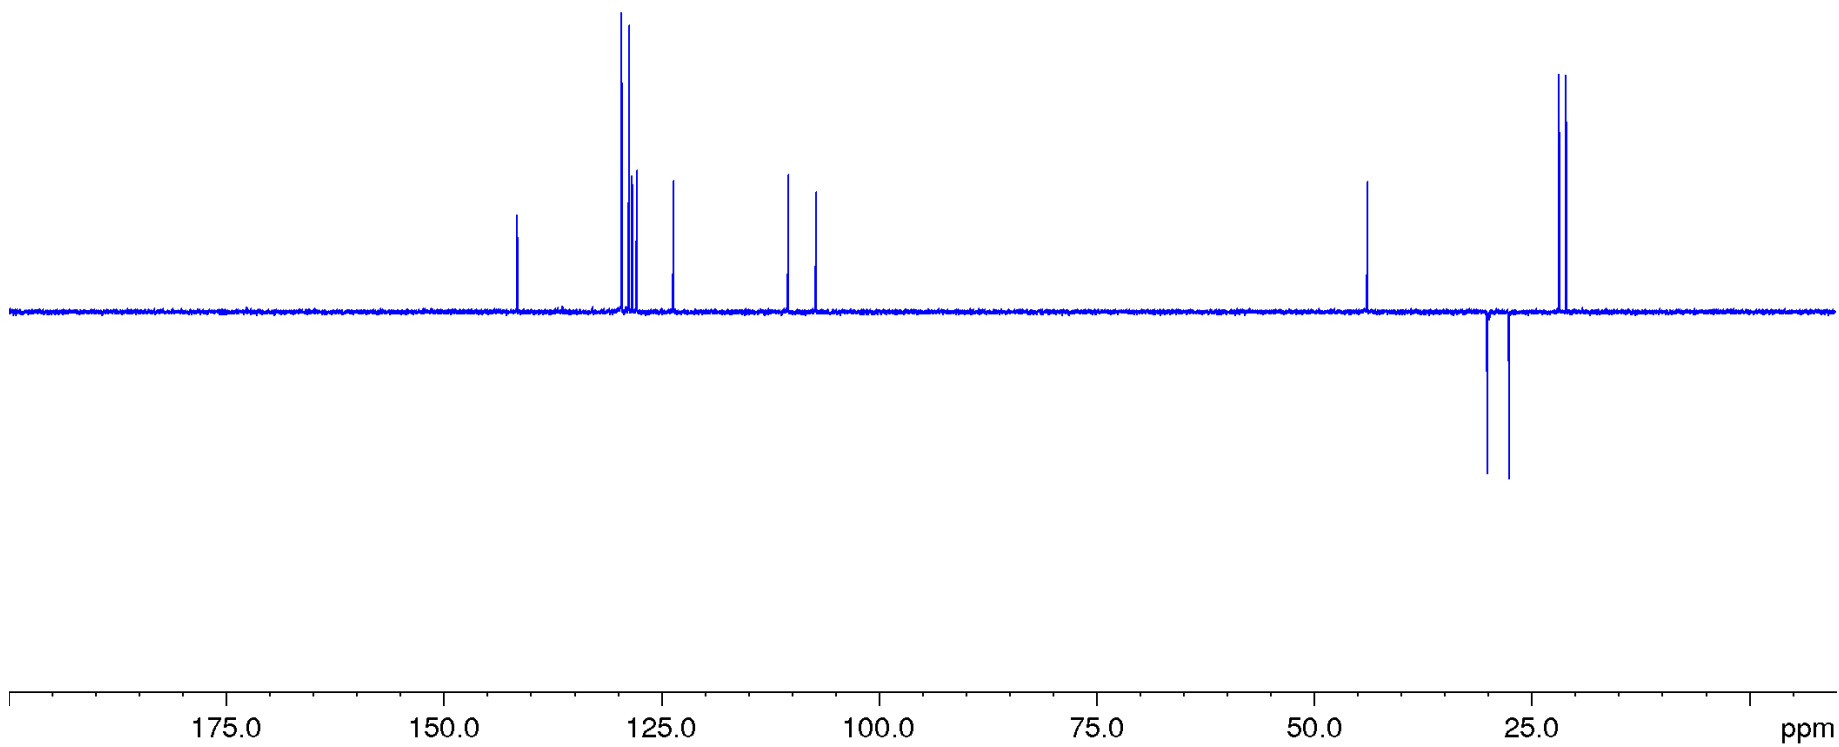

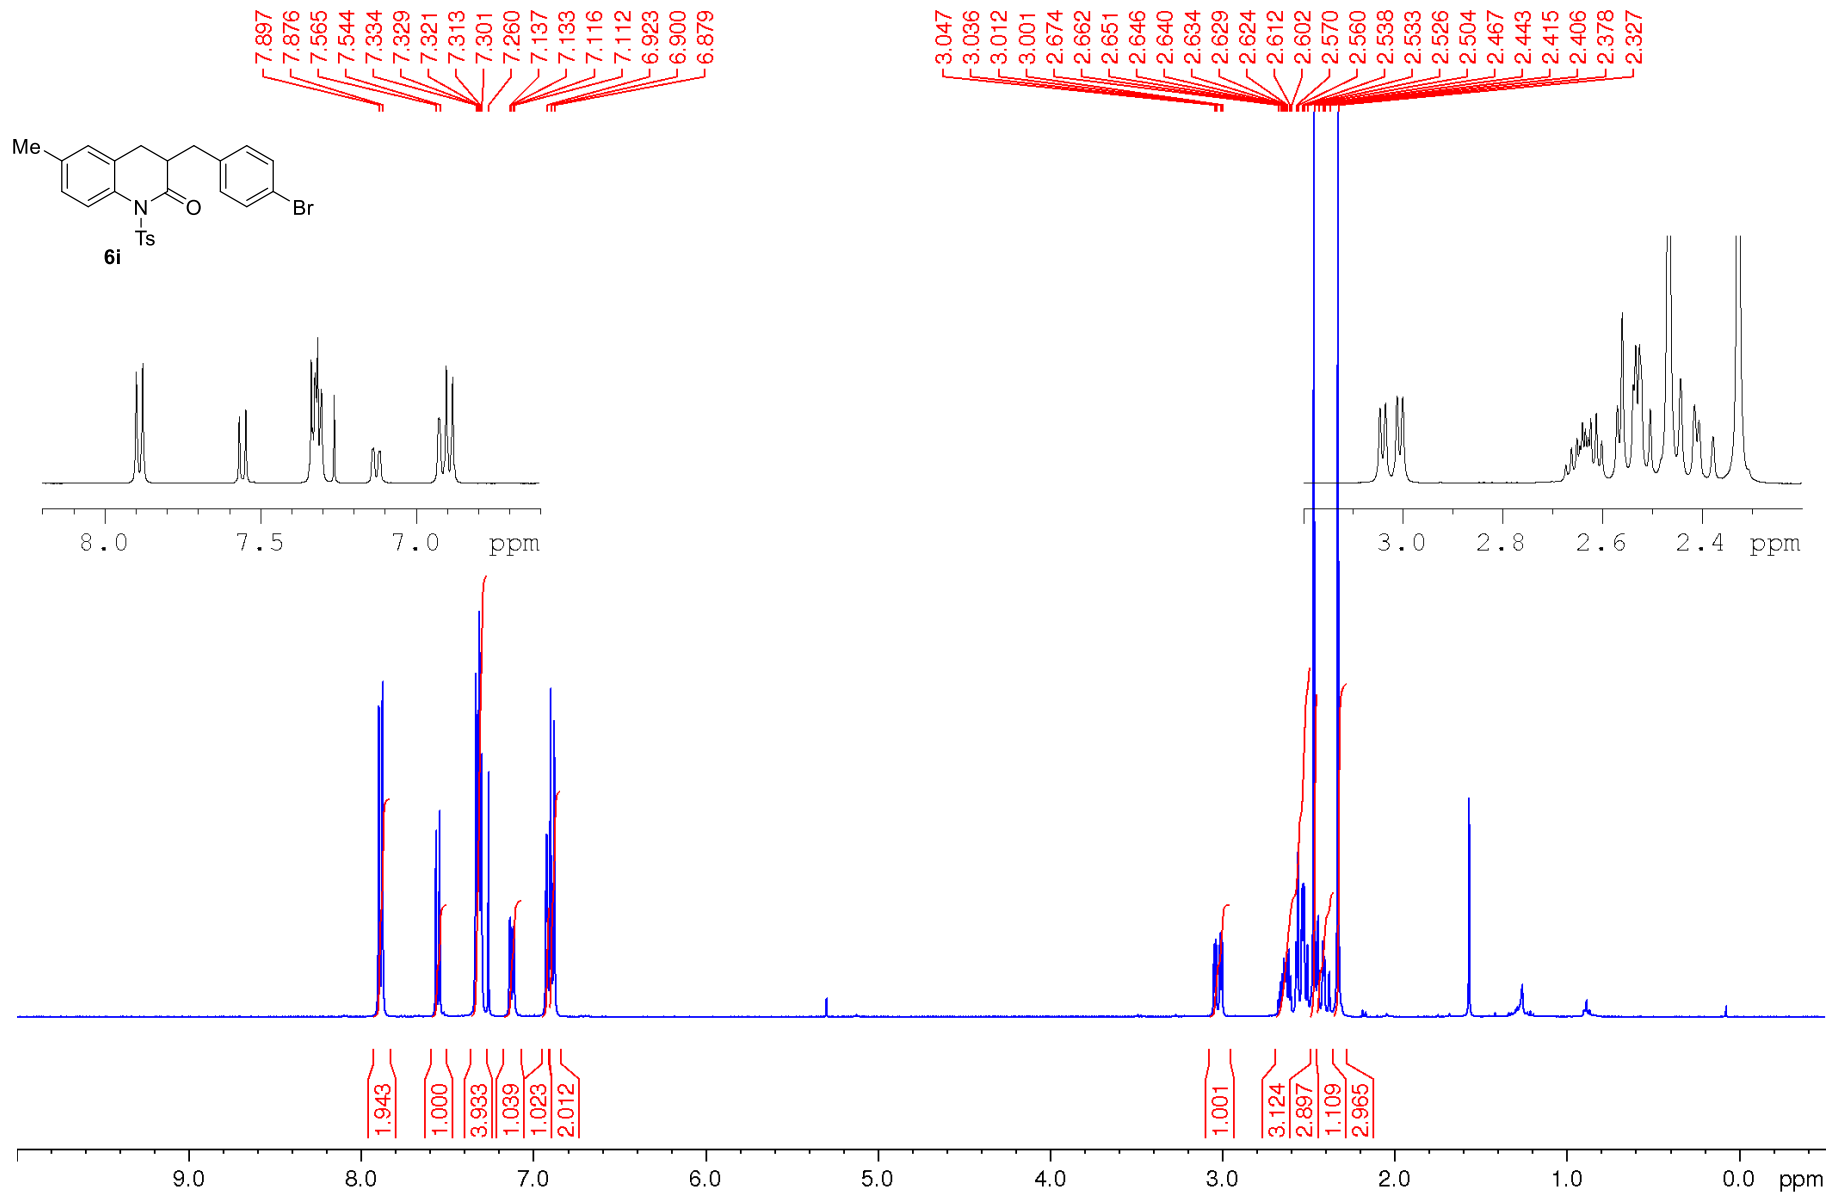



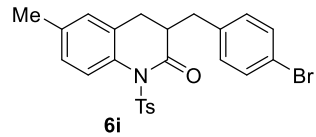

172.872

145.155  
137.350  
137.070  
136.538  
133.018  
131.764  
131.099  
129.649  
129.384  
128.820  
128.441  
128.017  
123.711  
120.632

45.828

34.433

29.724

21.967

21.084

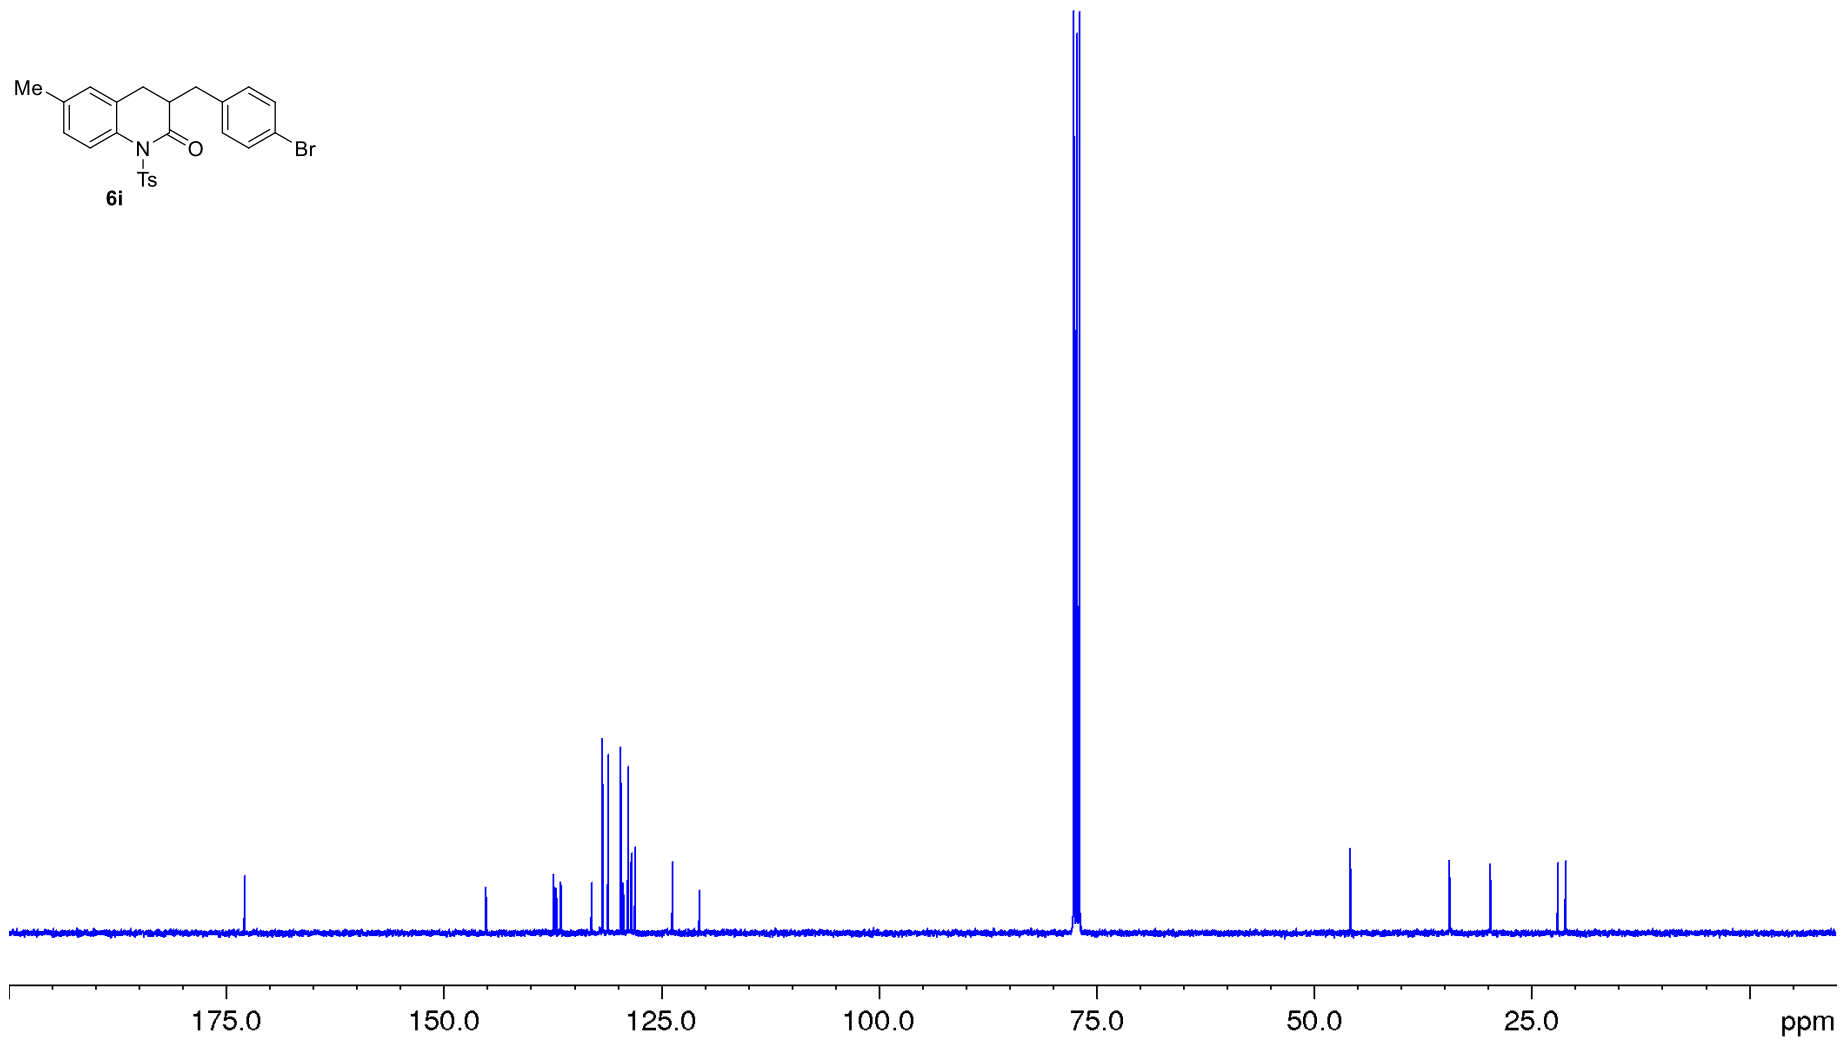

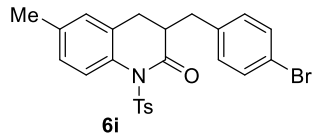

131.780  
131.141  
129.692  
128.833  
128.484  
128.037  
123.728

45.828

34.432

29.716

22.020

21.134

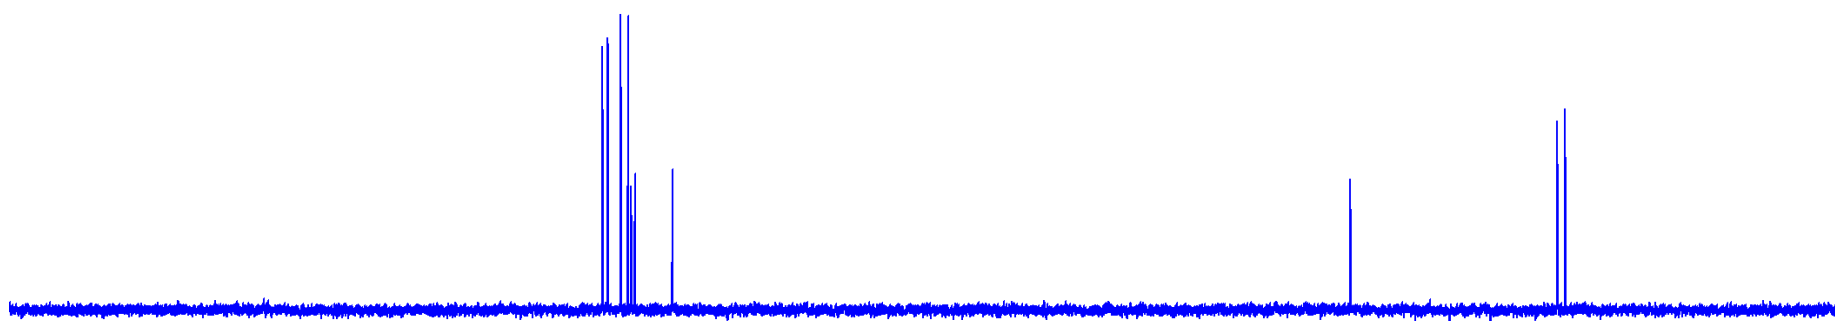

175.0

150.0

125.0

100.0

75.0

50.0

25.0

ppm

S70

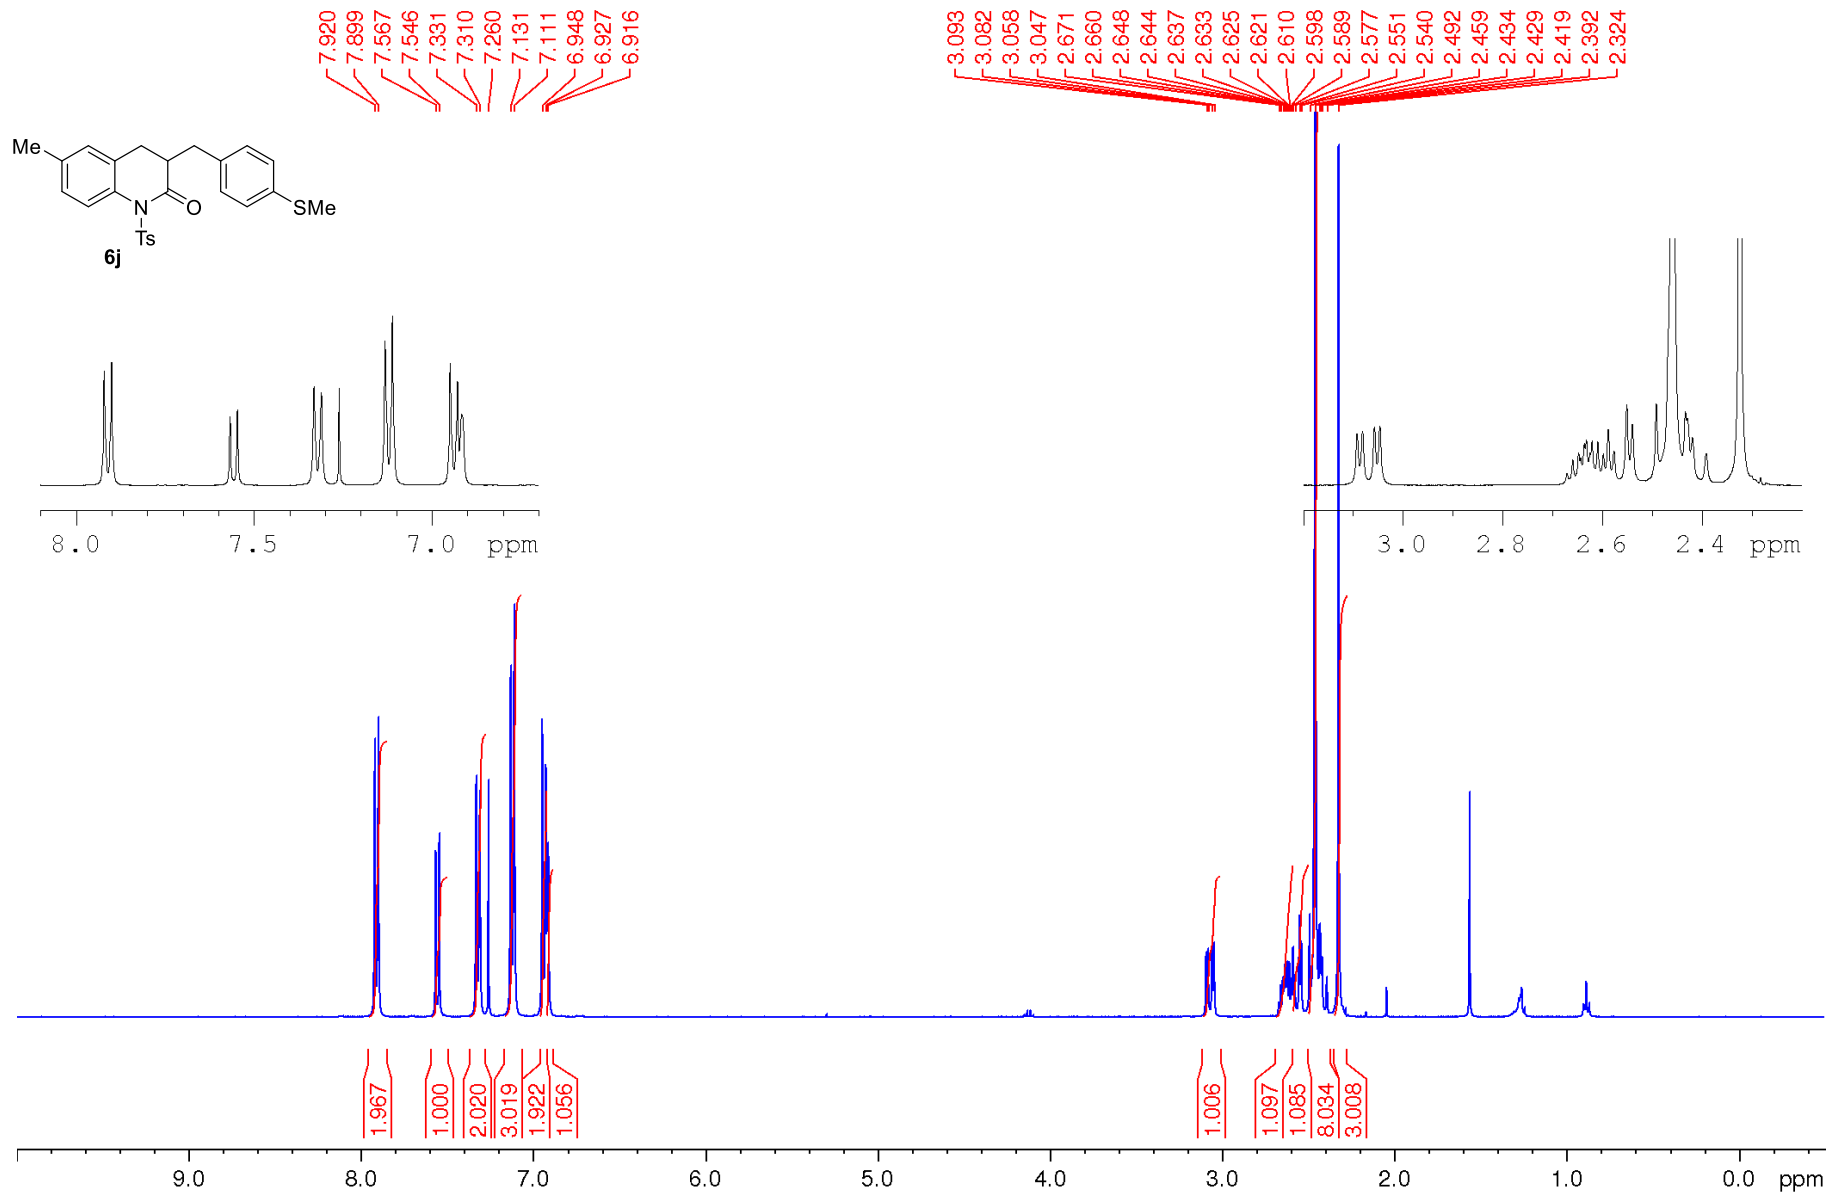

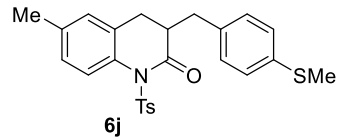

173.060

144.977  
137.053  
136.550  
136.345  
135.255  
132.995  
129.705  
129.557  
129.404  
128.725  
128.416  
127.840  
127.034  
123.520

45.995

34.388

29.542

21.845

20.977

16.136

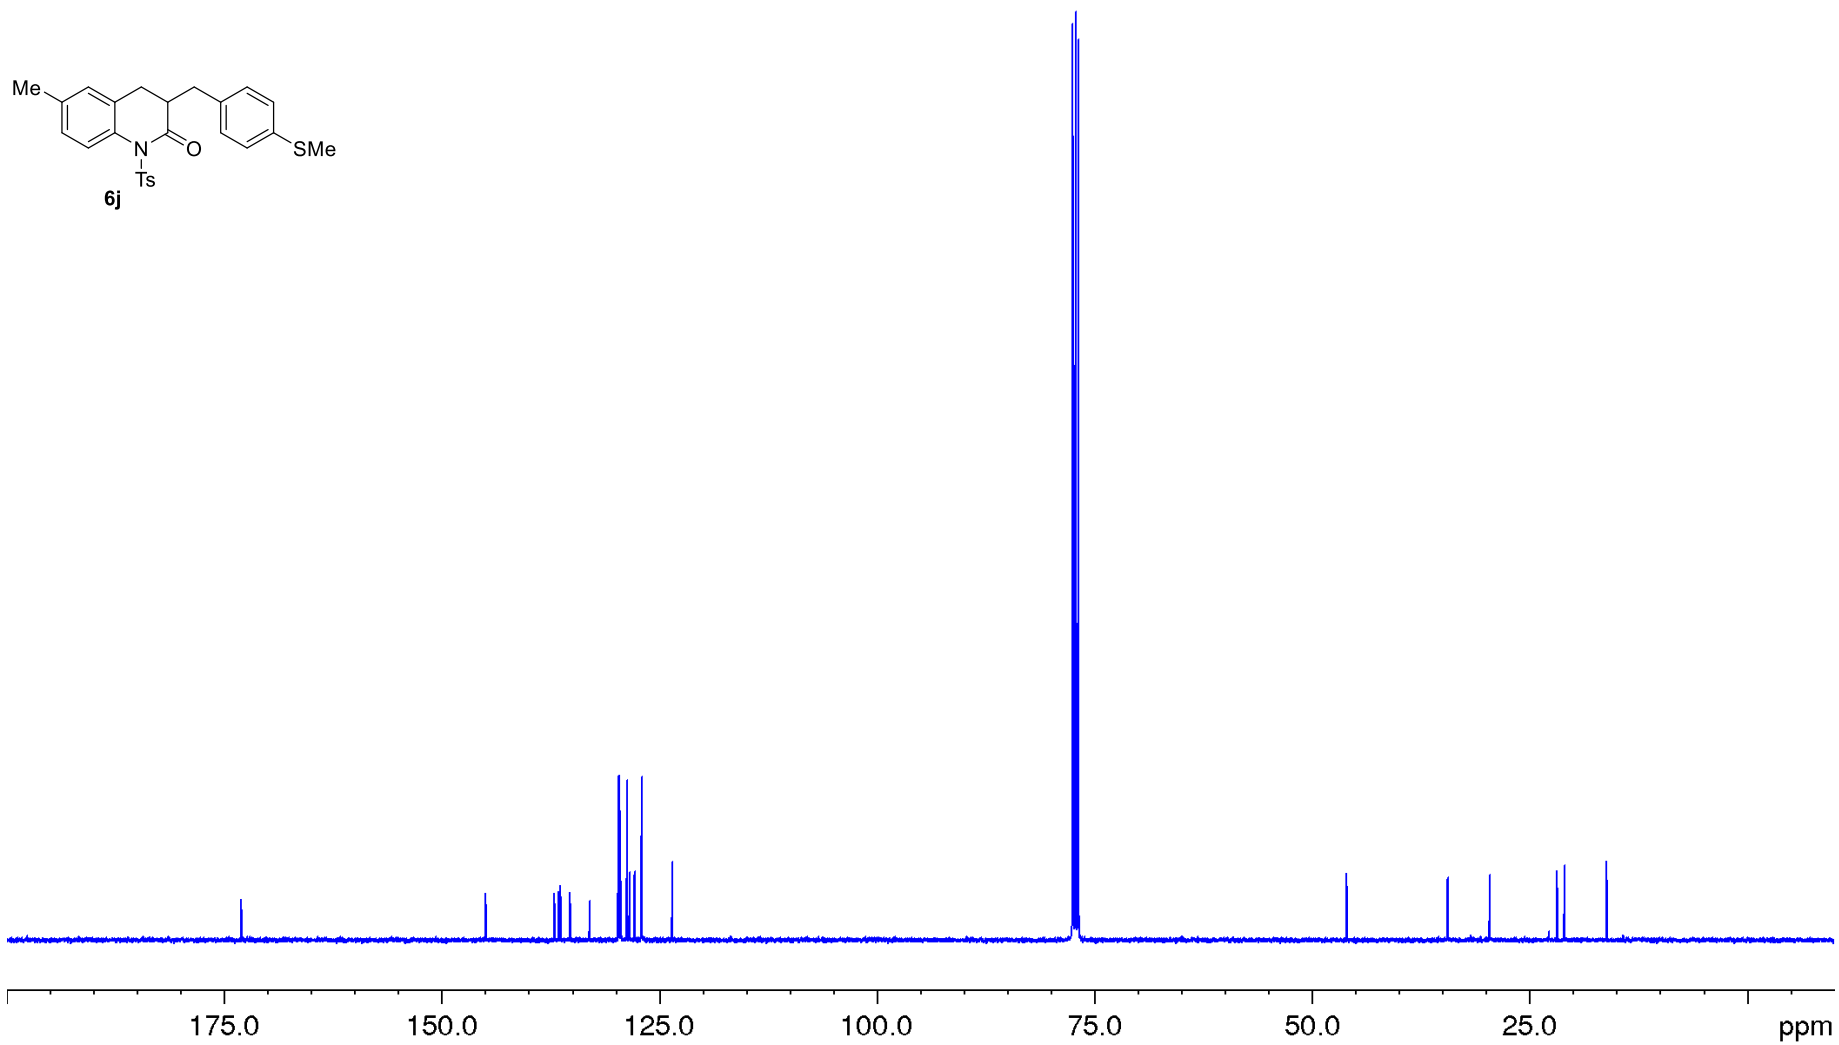



129.726  
129.592  
128.734  
128.448  
127.857  
126.975  
123.527

45.994

34.377

29.514

21.893

21.020

16.119

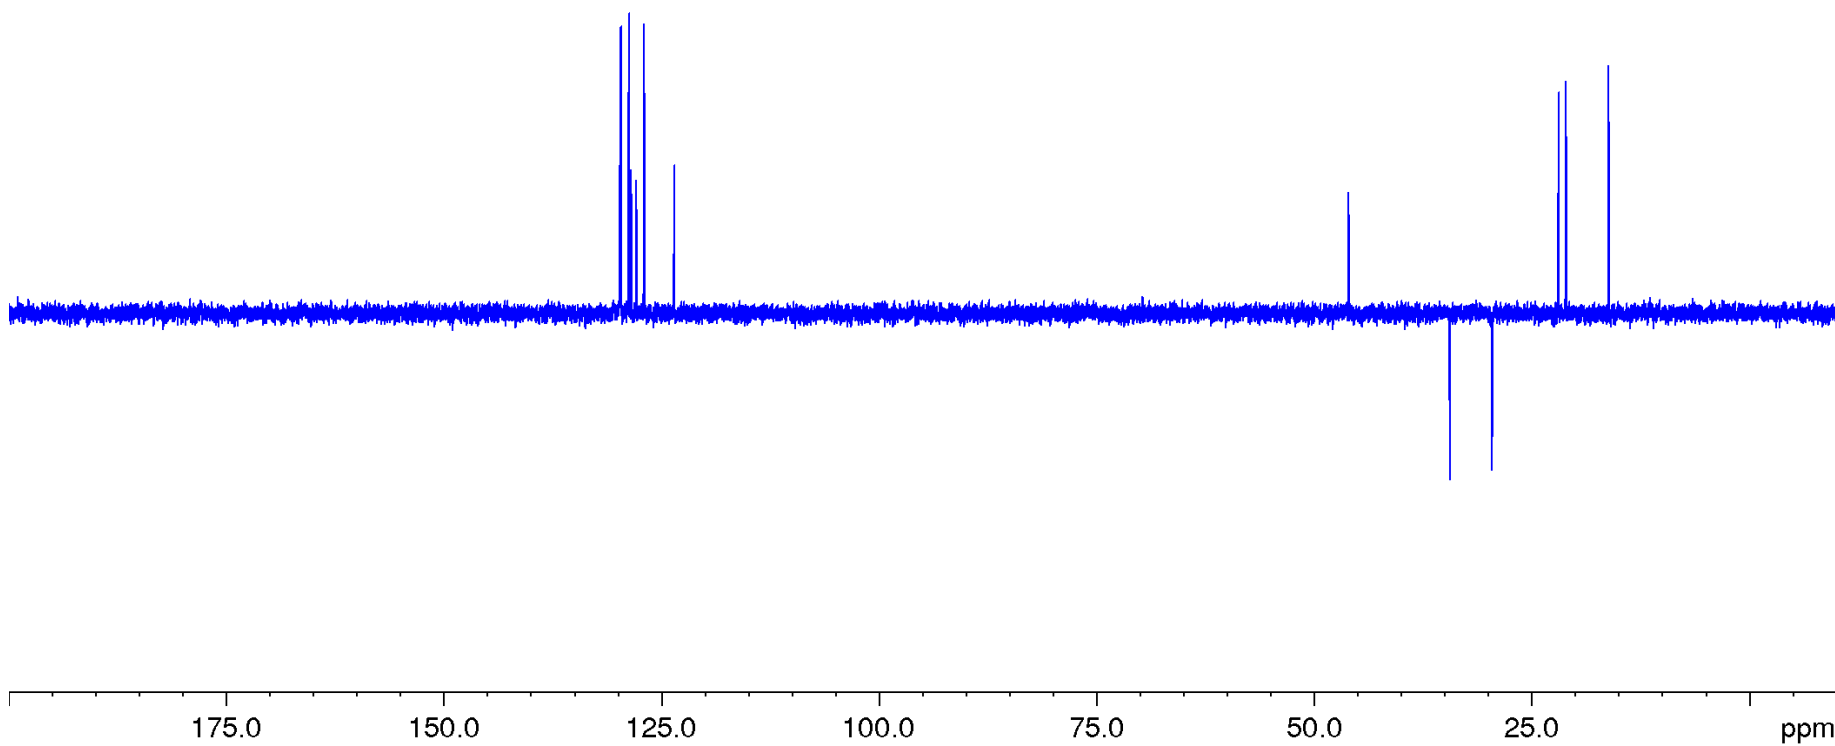

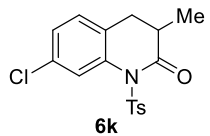

7.942  
 7.921  
 7.696  
 7.691  
 7.352  
 7.332  
 7.189  
 7.184  
 7.169  
 7.164  
 7.146  
 7.126

2.739  
 2.728  
 2.703  
 2.692  
 2.617  
 2.588  
 2.552  
 2.530  
 2.514  
 2.503  
 2.498  
 2.486  
 2.473  
 2.469  
 2.447  
 1.127  
 1.110

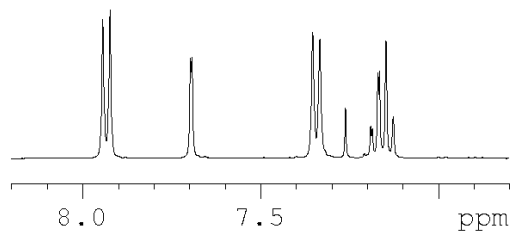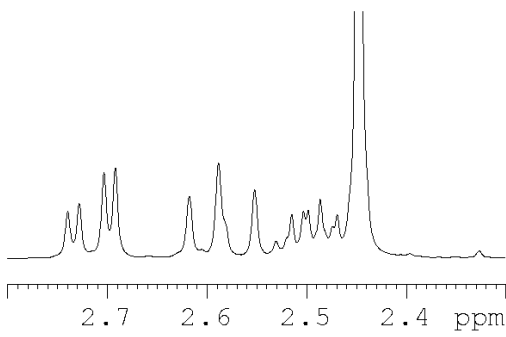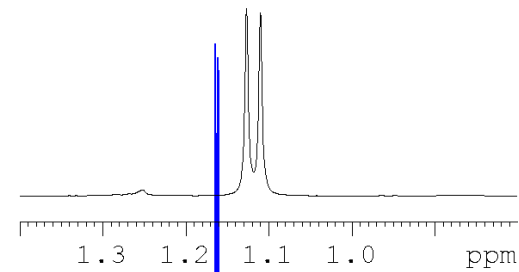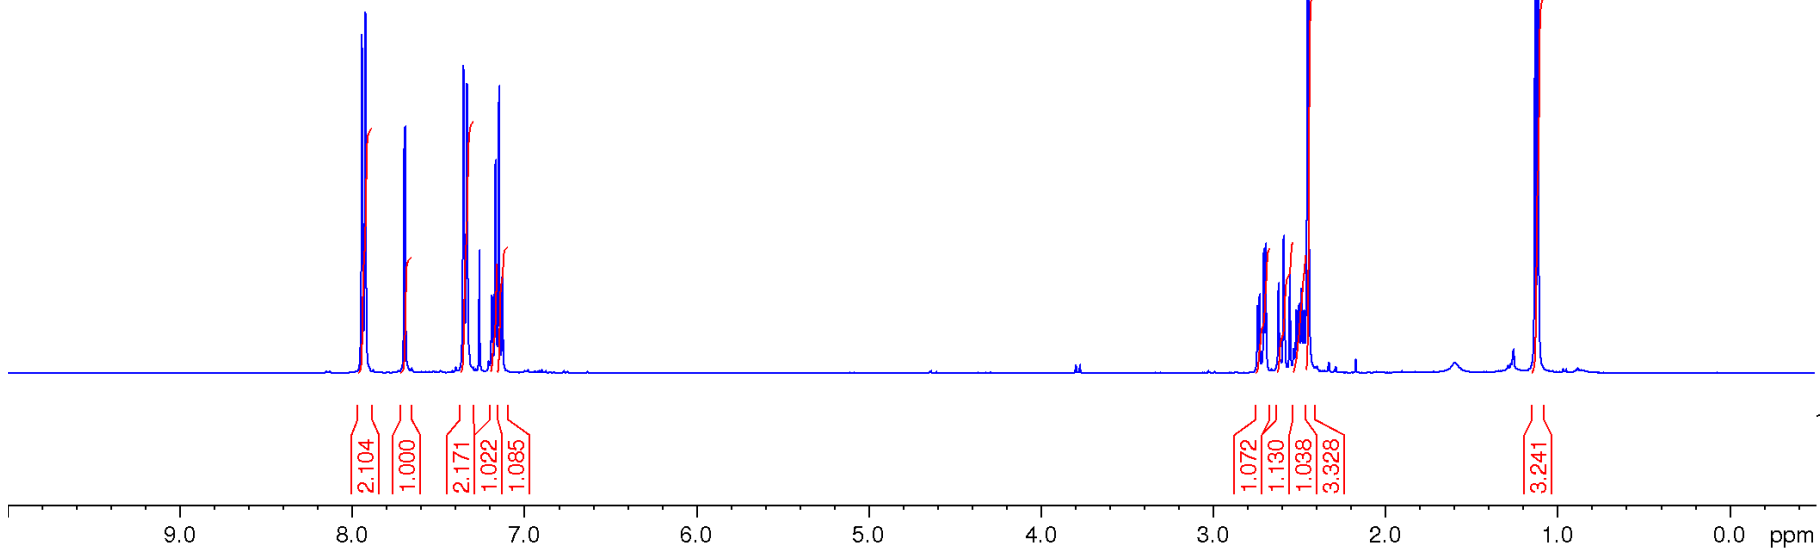

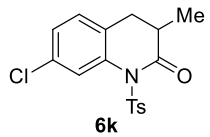

173.678

145.289  
136.678  
136.423  
132.682  
129.683  
128.678  
128.563  
128.416  
126.304  
123.776

39.243

32.652

21.845

14.906

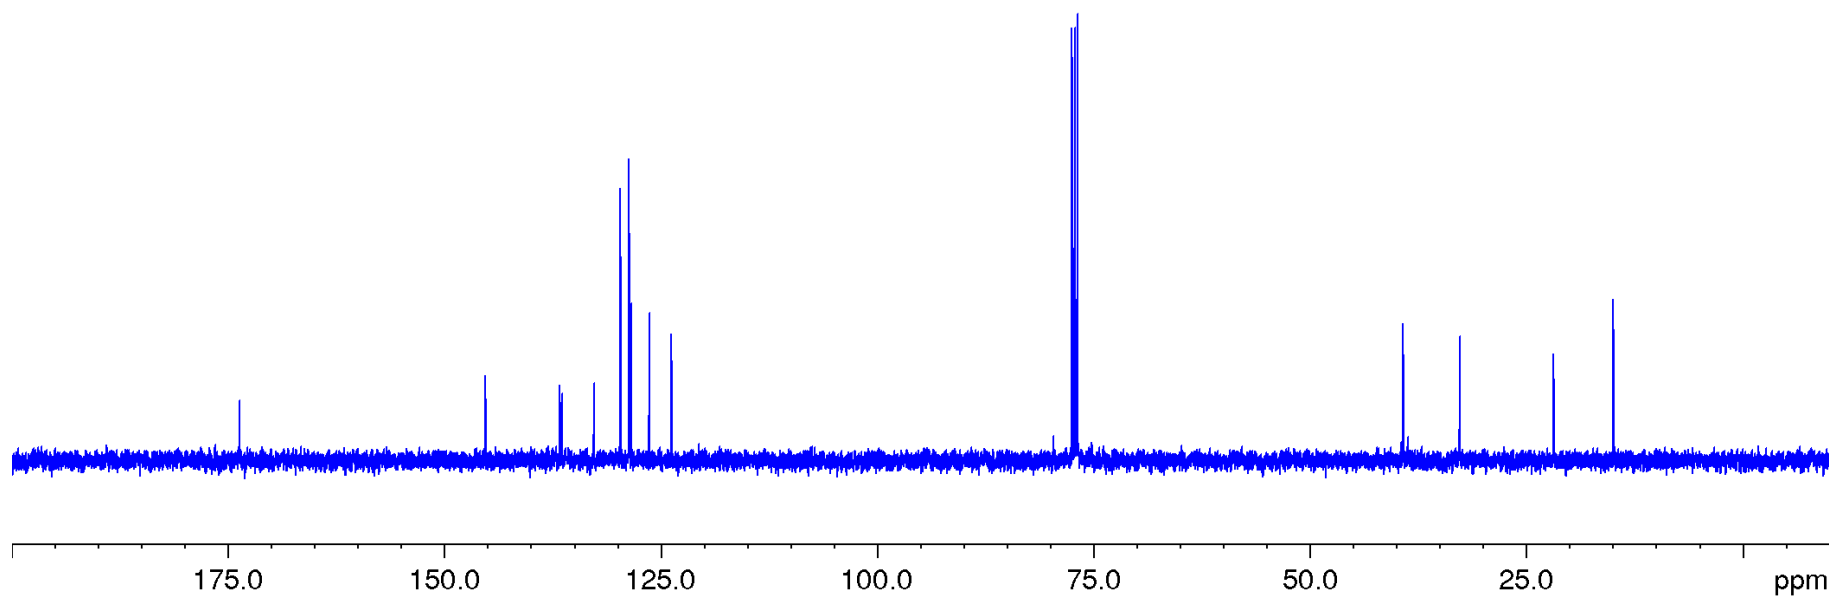

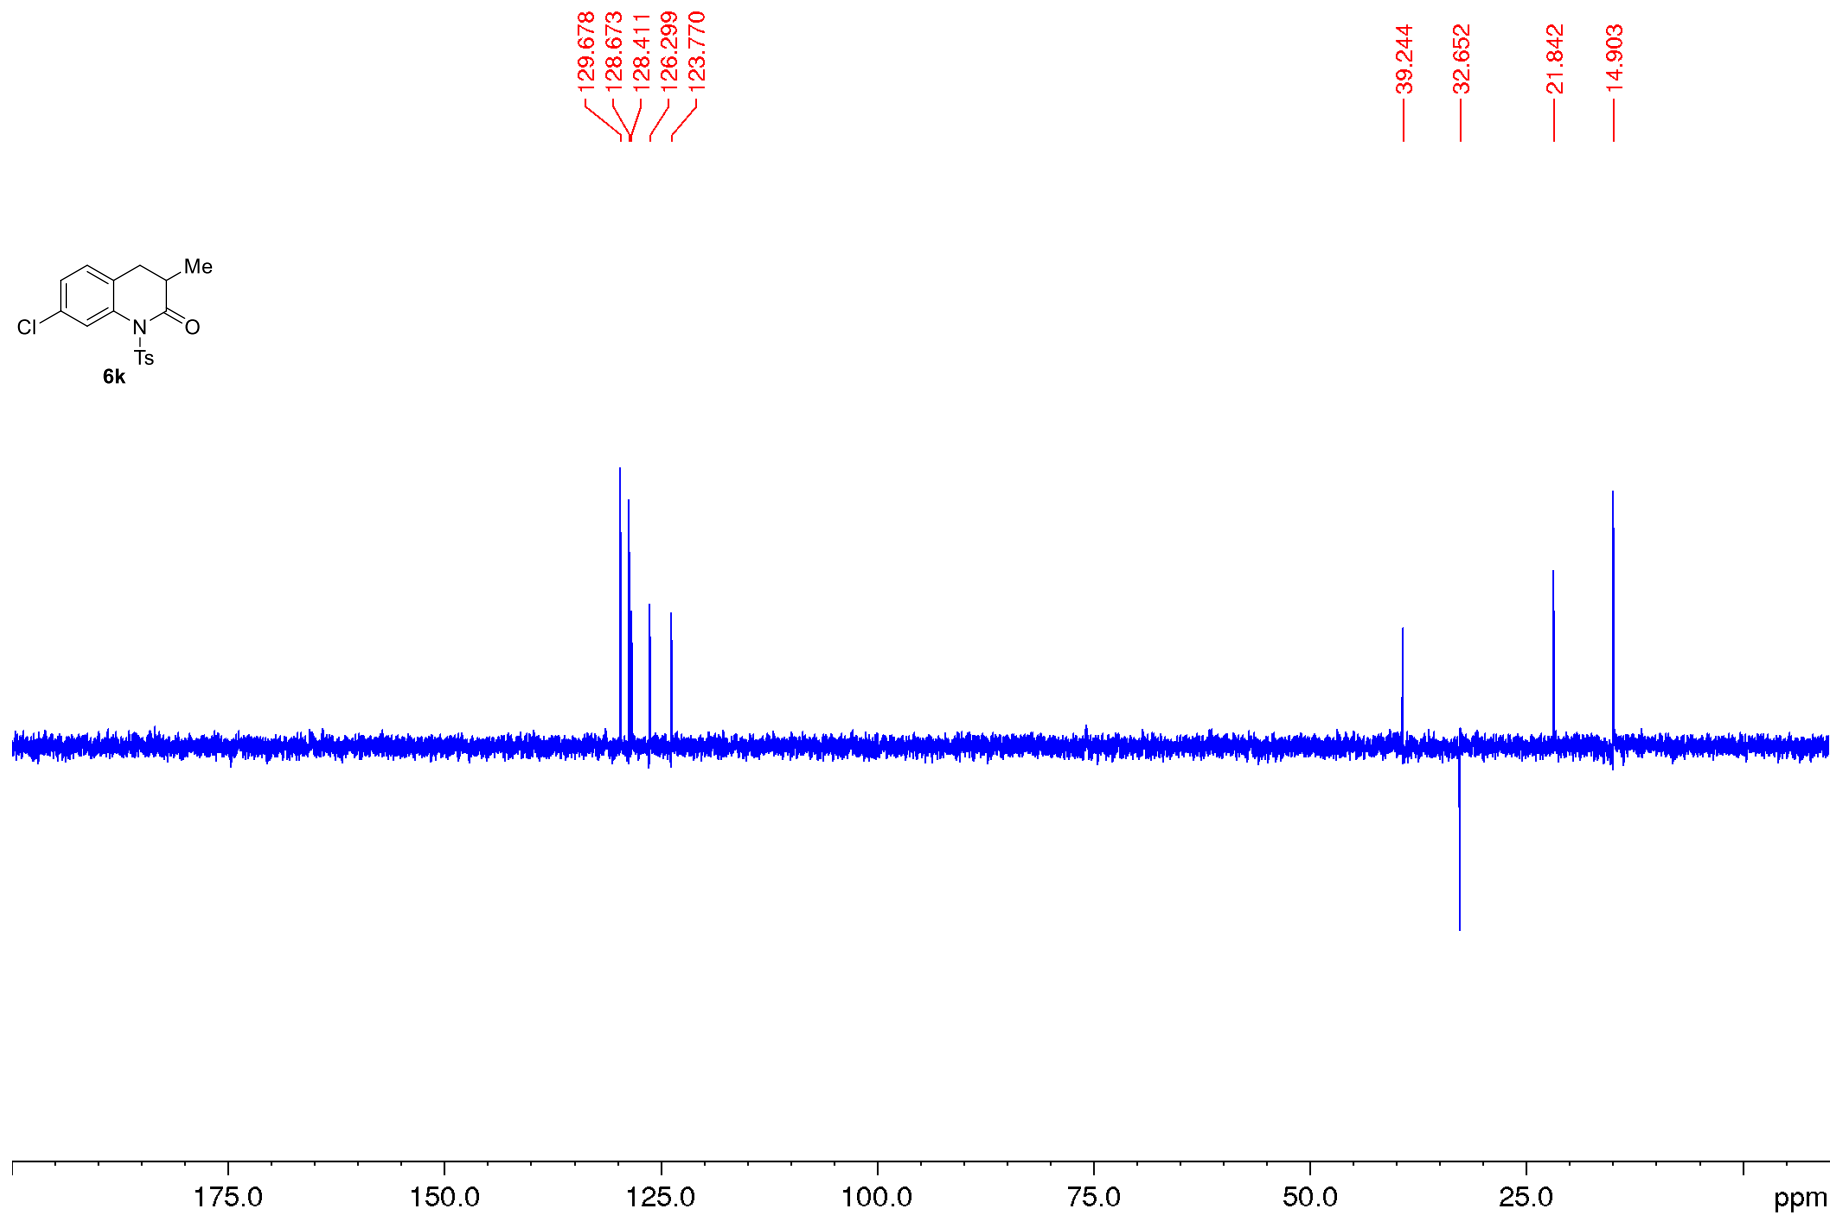



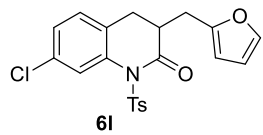

7.930  
7.909  
7.698  
7.693  
7.352  
7.331  
7.233  
7.231  
7.182  
7.178  
7.162  
7.157  
7.107  
7.087  
6.214  
6.209  
6.206  
6.202  
5.877  
5.869

3.110  
3.102  
3.075  
3.066  
2.775  
2.764  
2.754  
2.743  
2.734  
2.726  
2.710  
2.688  
2.676  
2.673  
2.666  
2.652  
2.526  
2.497  
2.489  
2.464

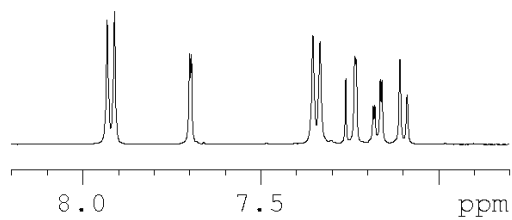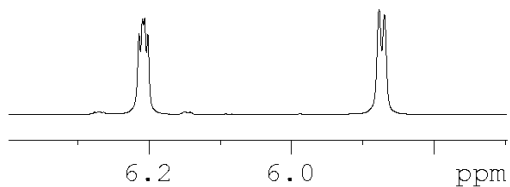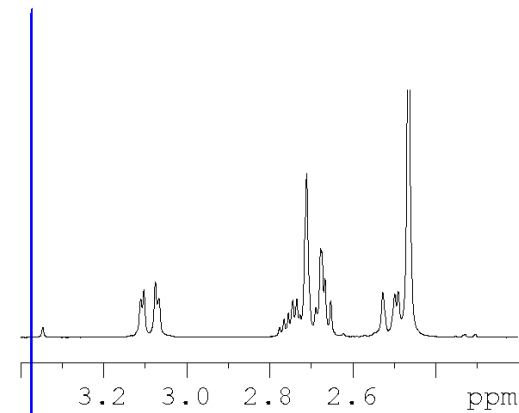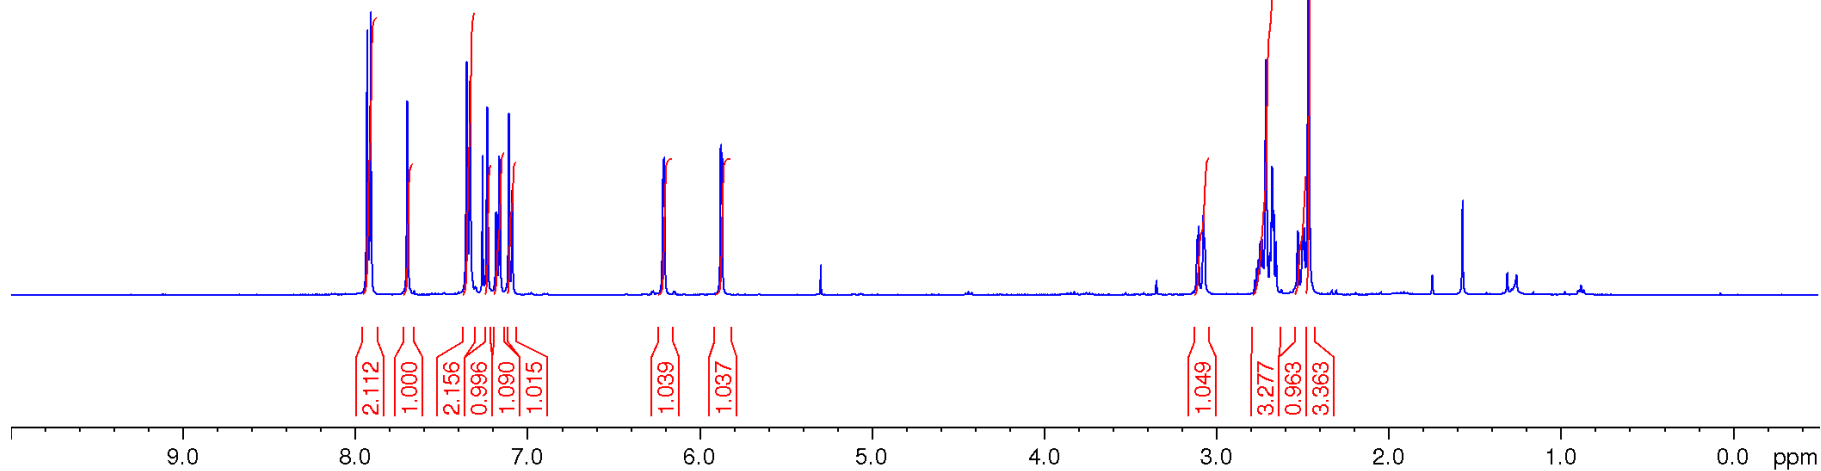

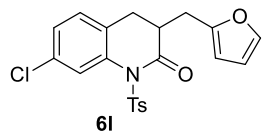

172.040

151.865

145.337

141.672

136.599

136.275

132.833

129.682

128.844

128.643

128.058

126.420

123.813

110.417

107.403

43.597

29.630

27.547

21.854

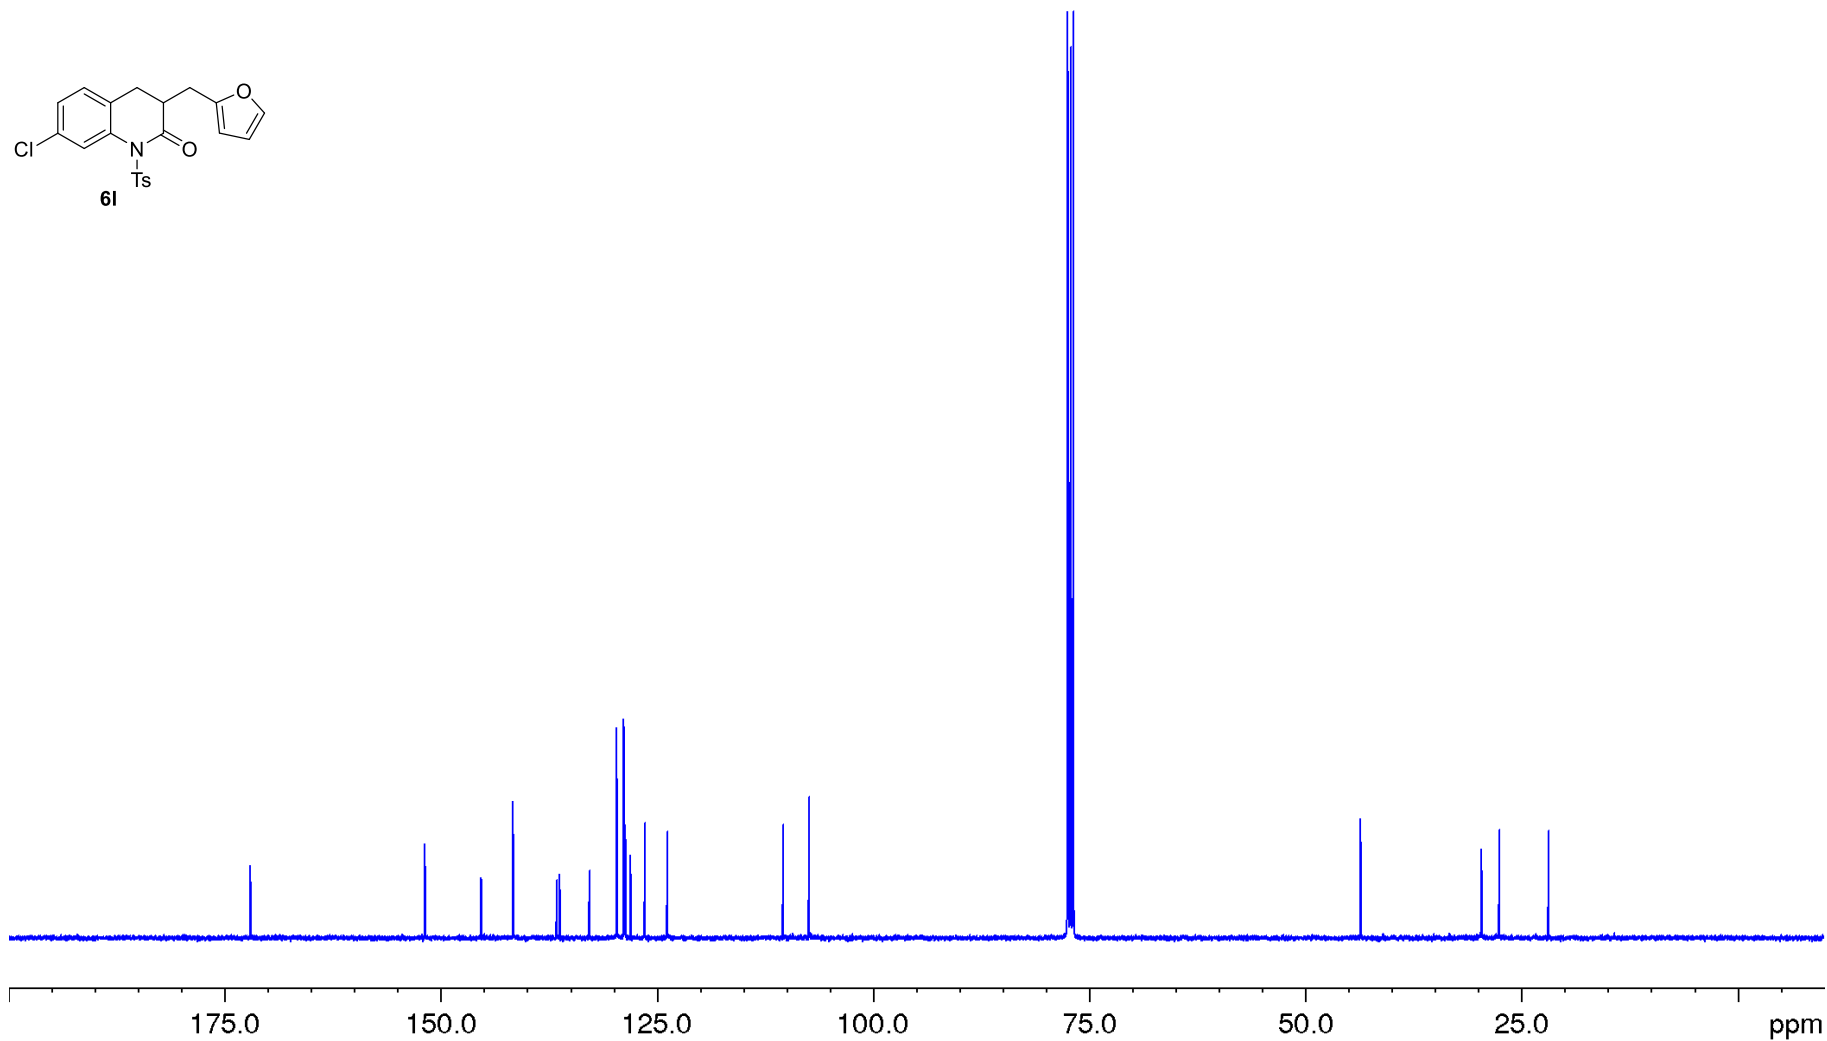

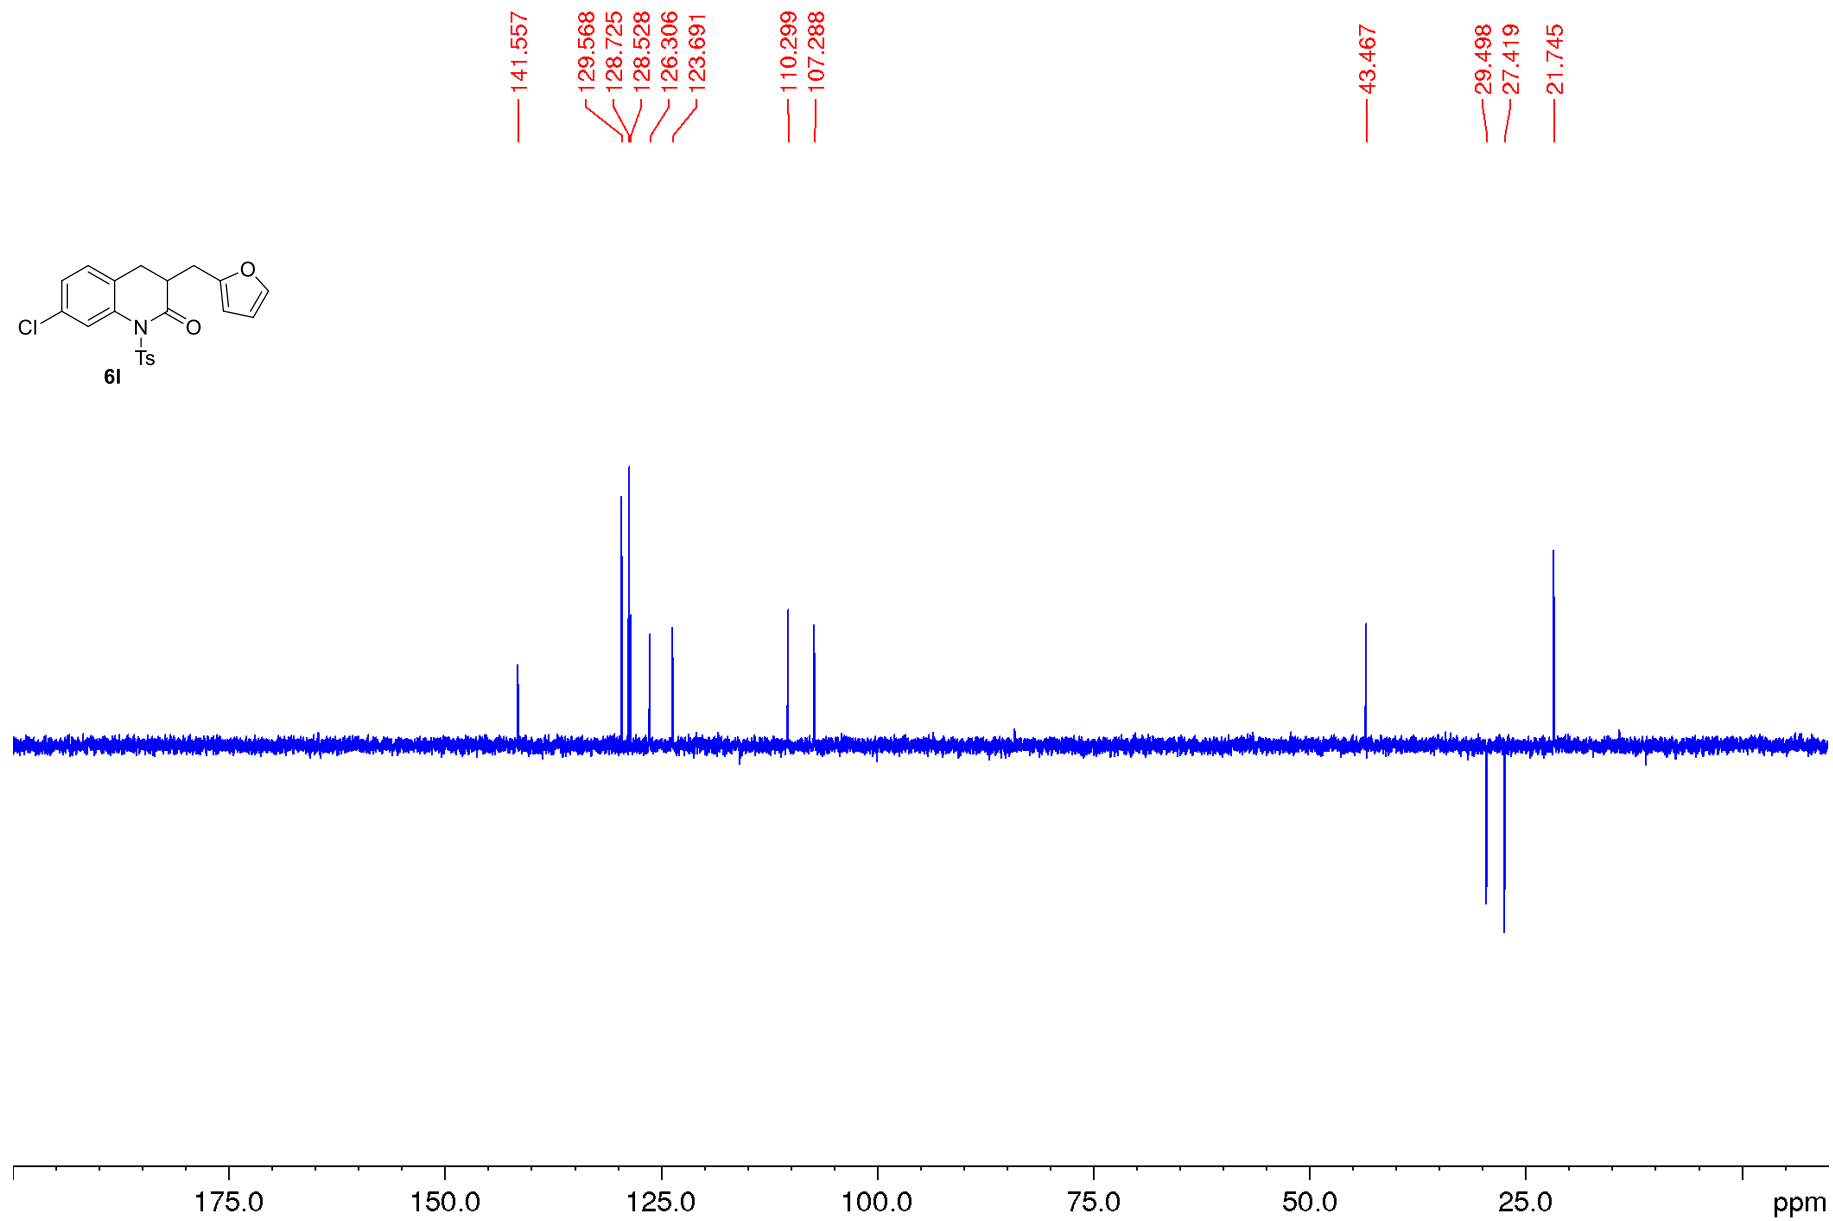

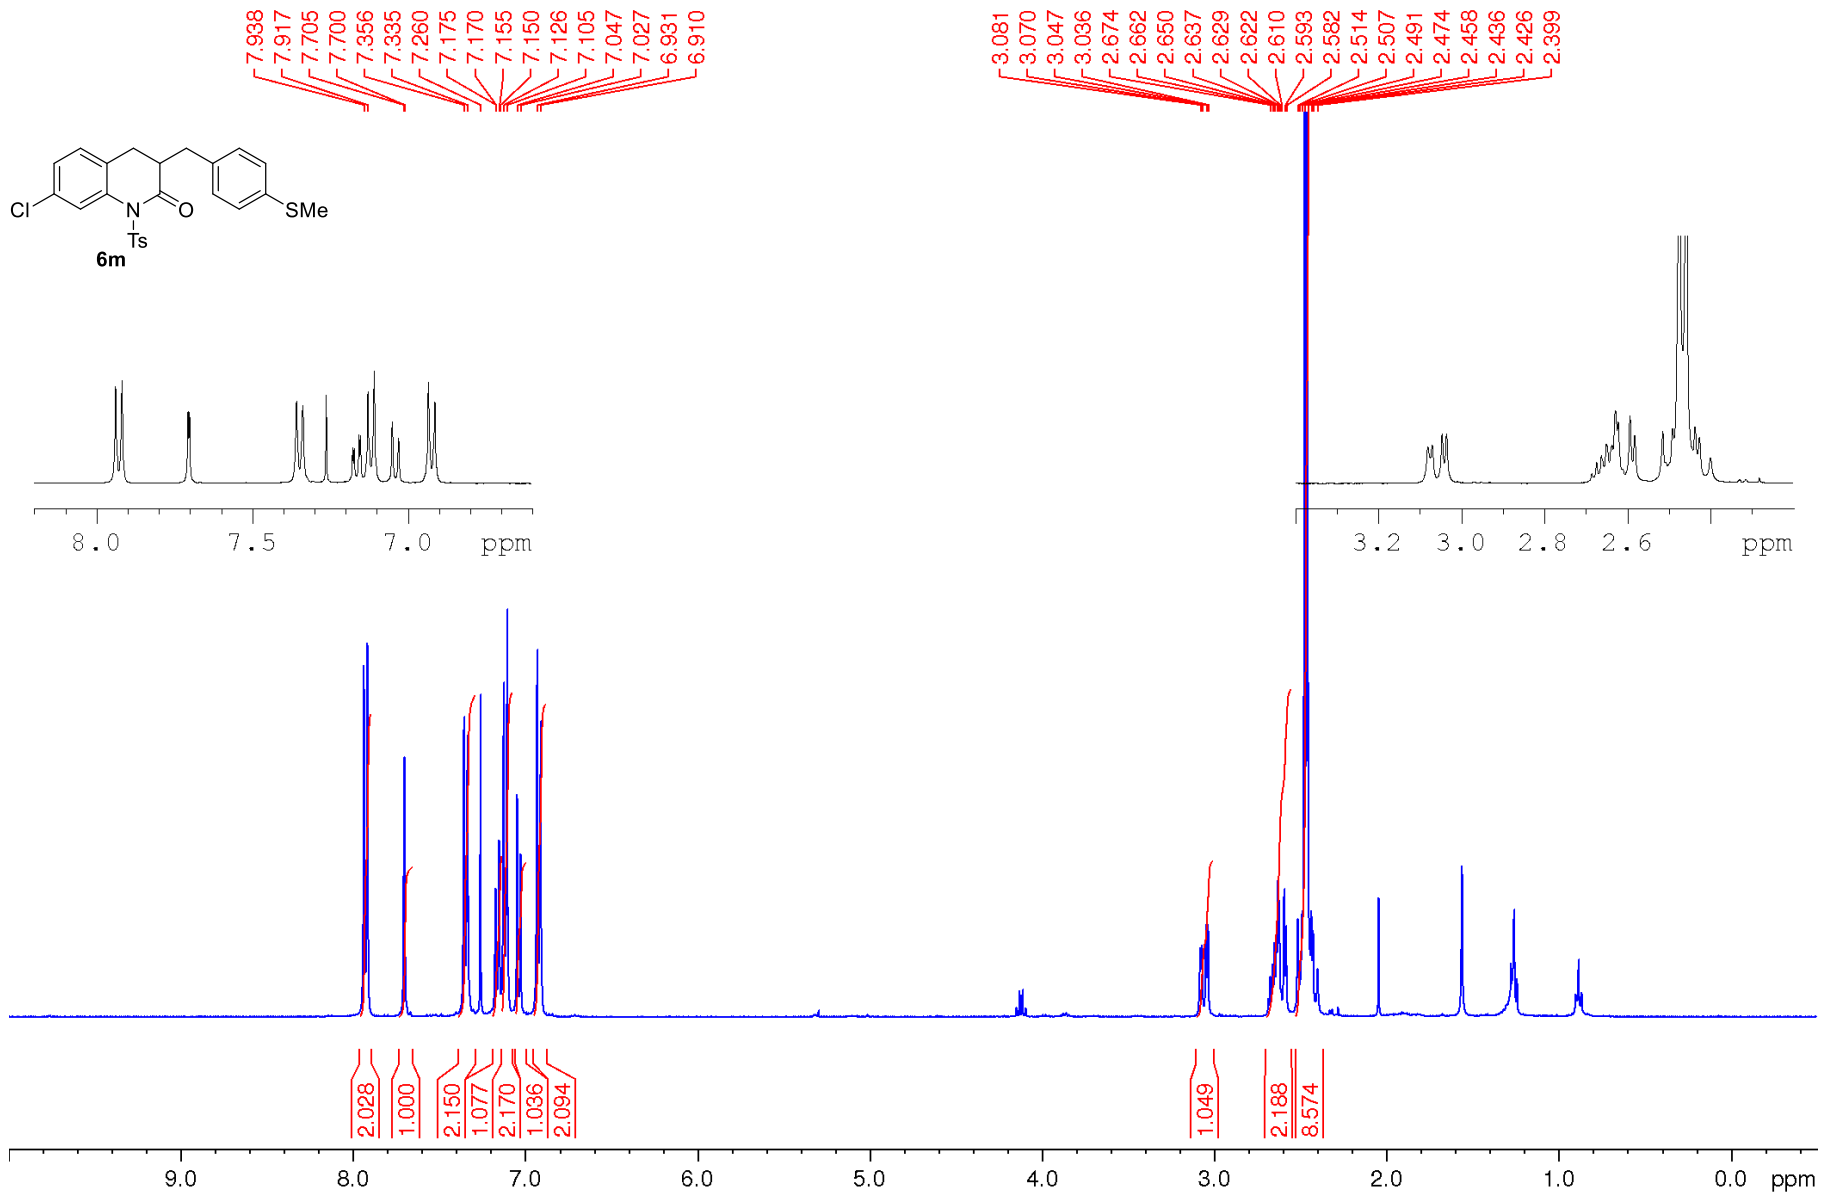

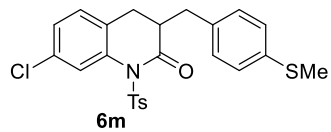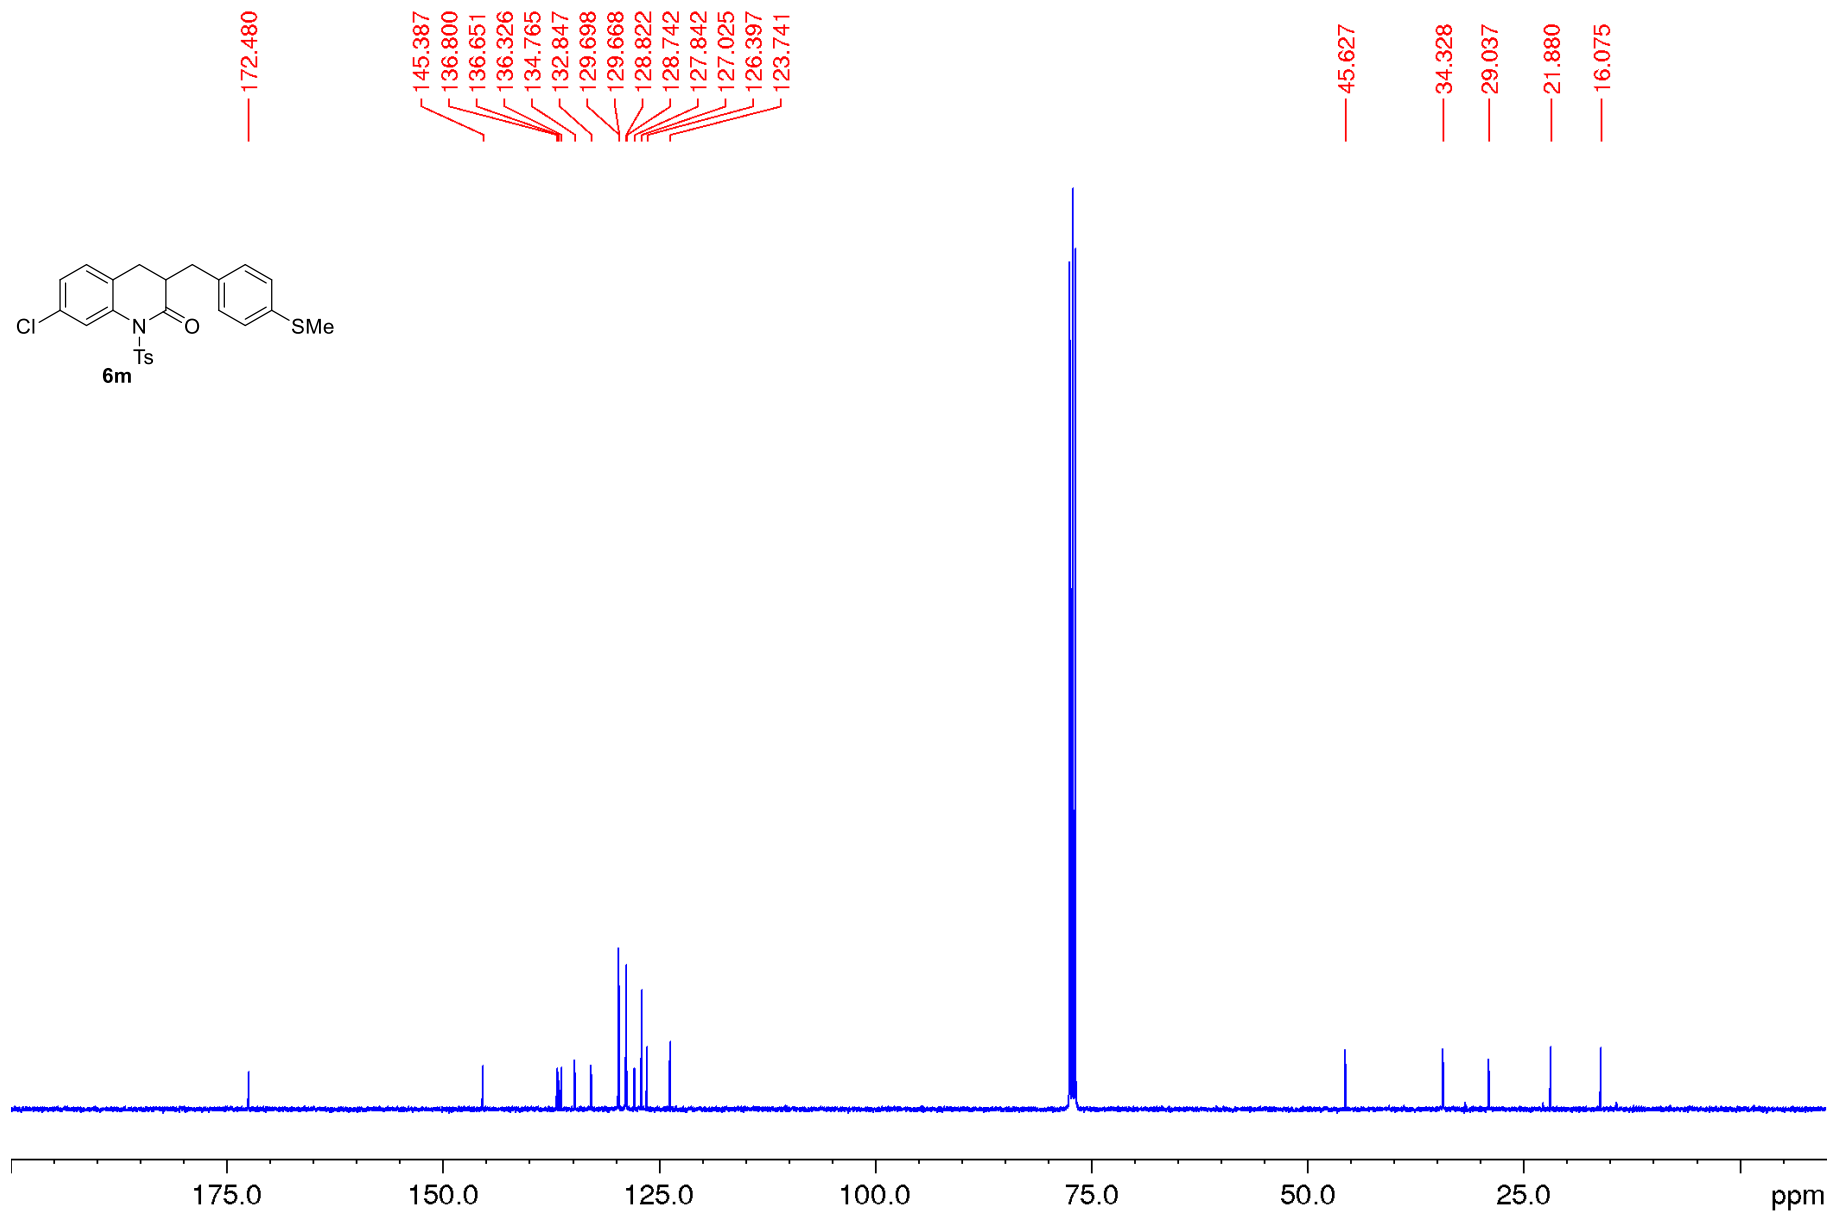



129.752  
129.713  
128.847  
128.811  
126.983  
126.443  
123.759

45.633  
34.333  
29.034  
21.943  
16.075

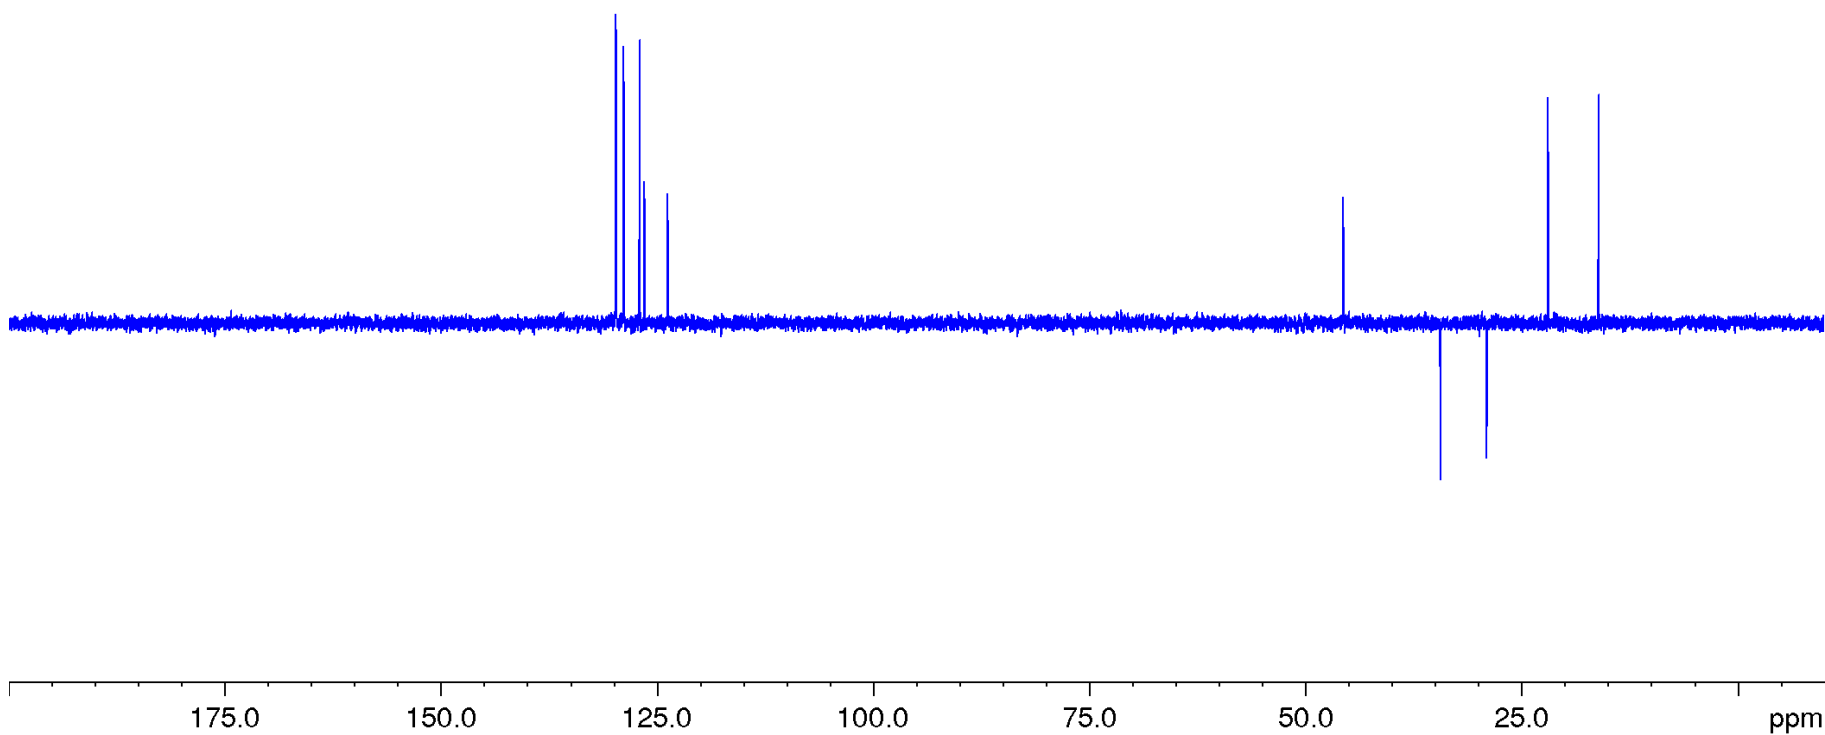

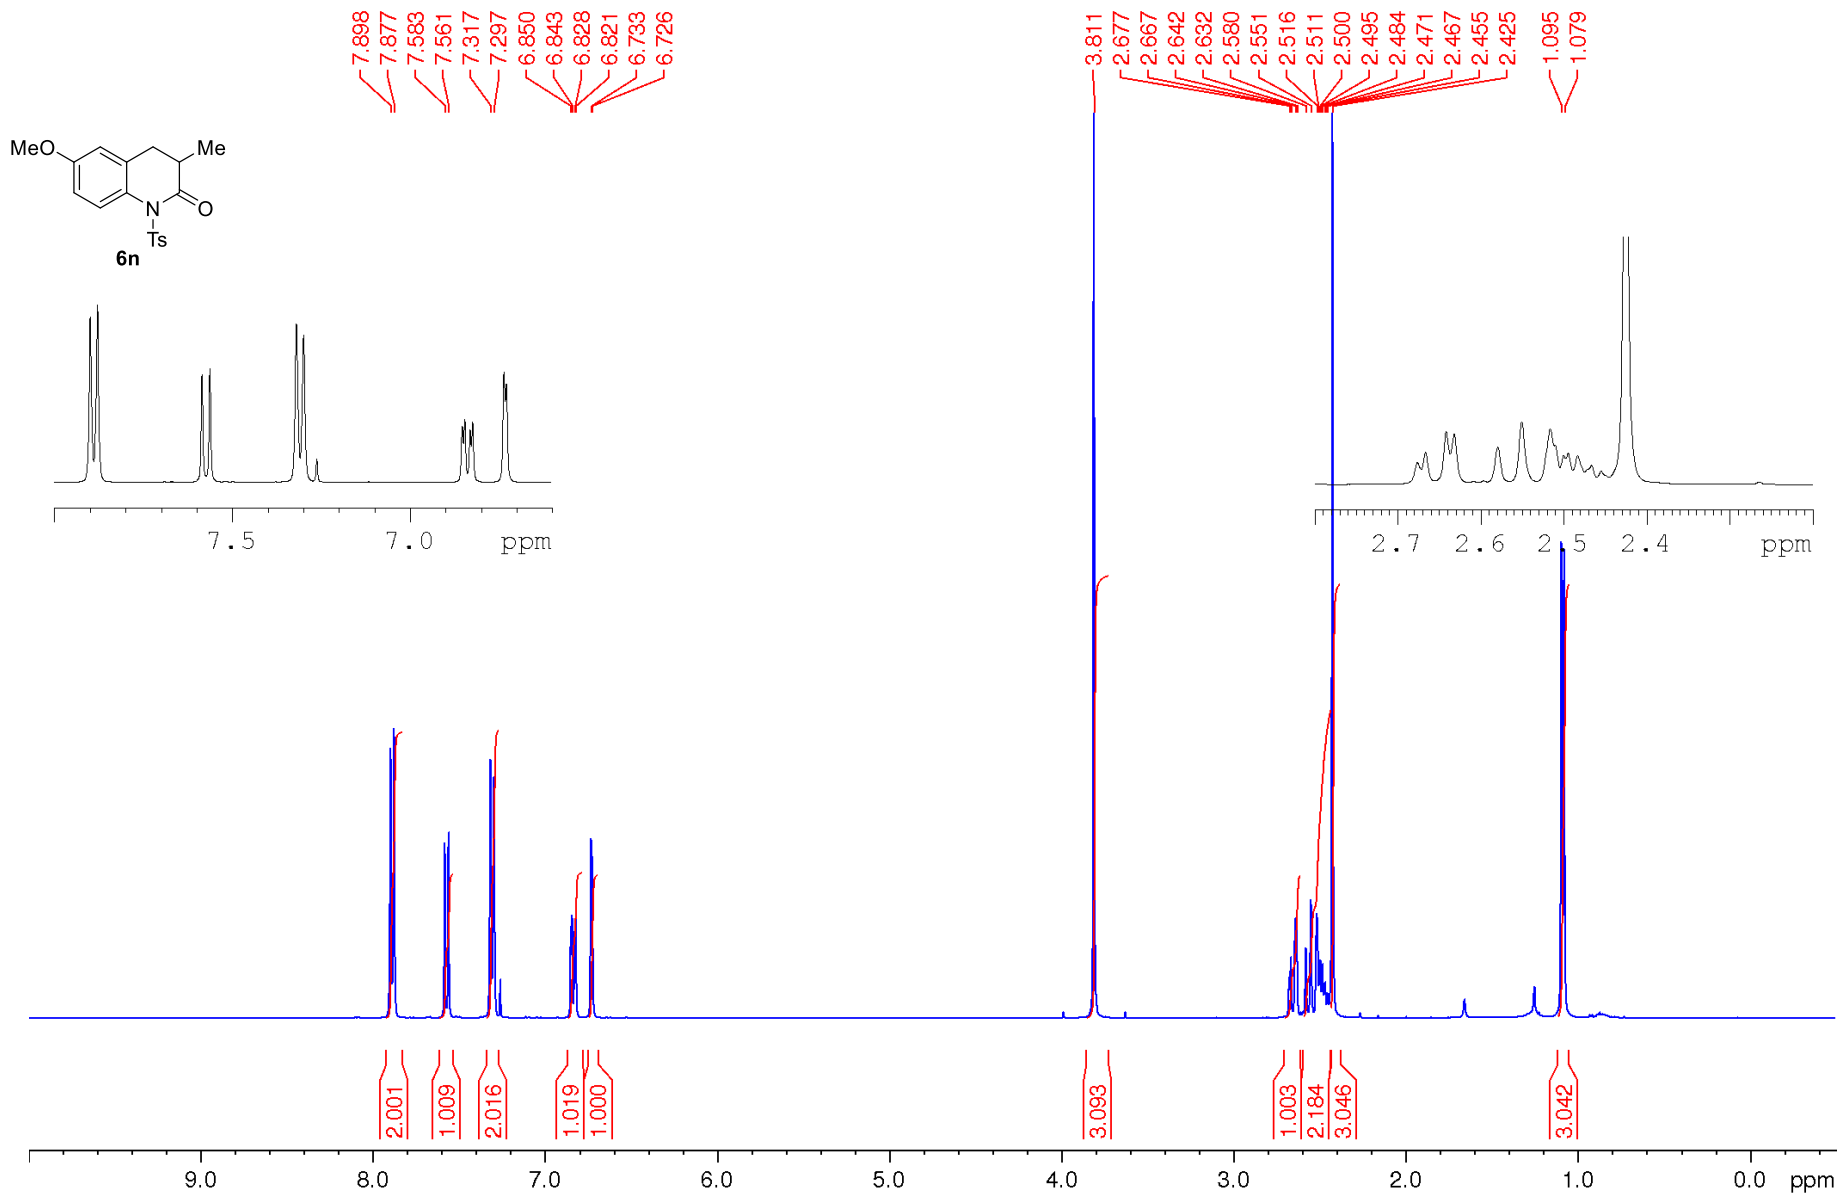

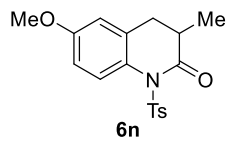

174.236  
157.823  
144.956  
137.035  
131.931  
129.601  
128.656  
128.620  
125.139  
113.245  
111.961  
55.690  
39.557  
33.520  
21.867  
14.919

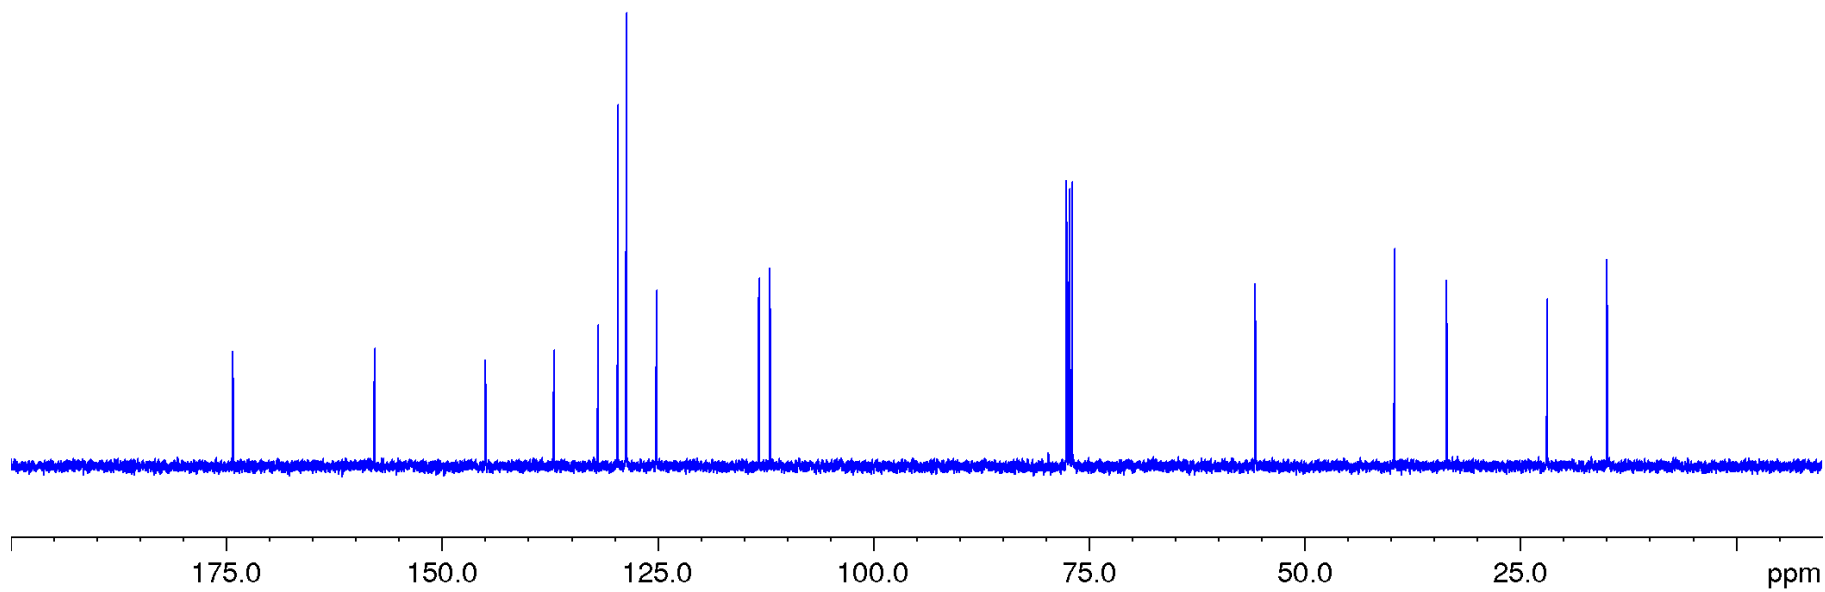



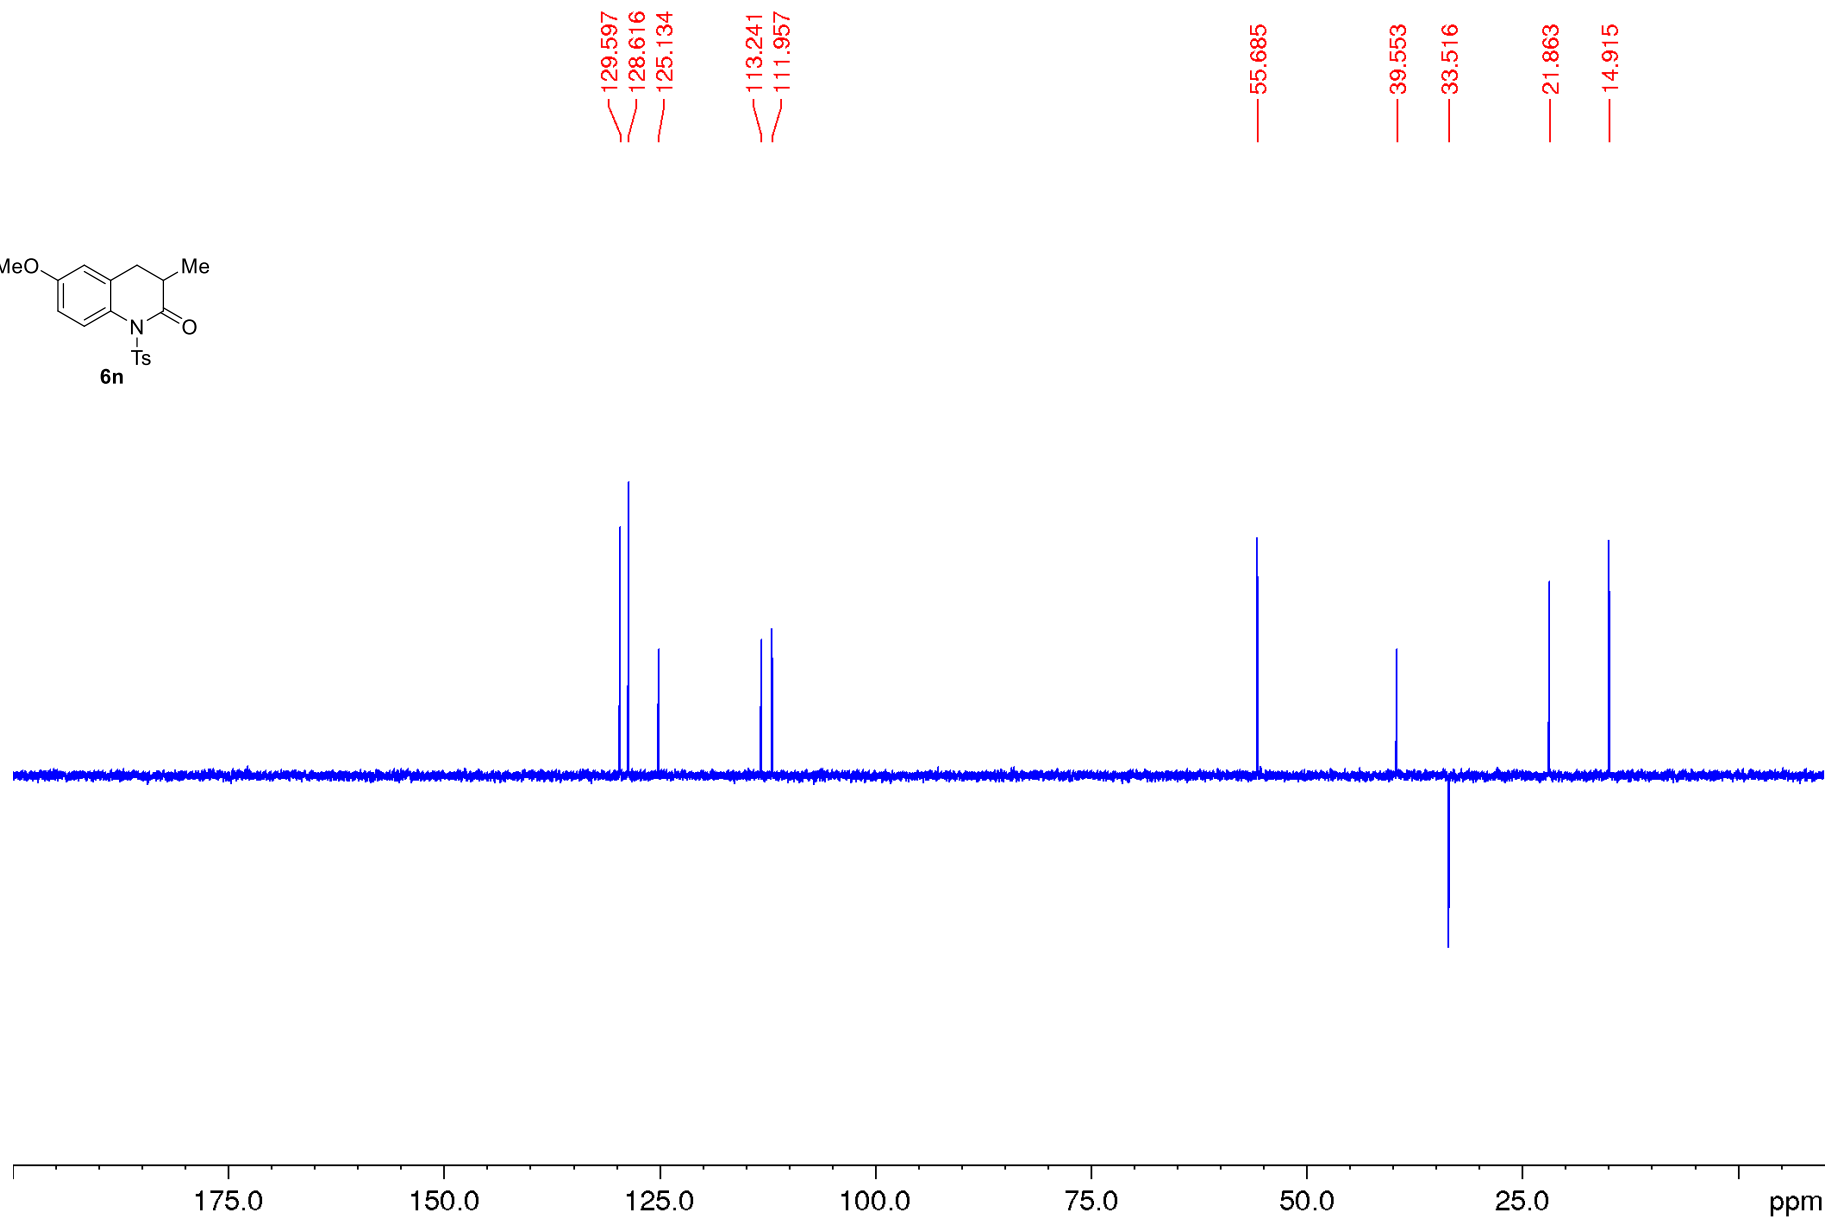

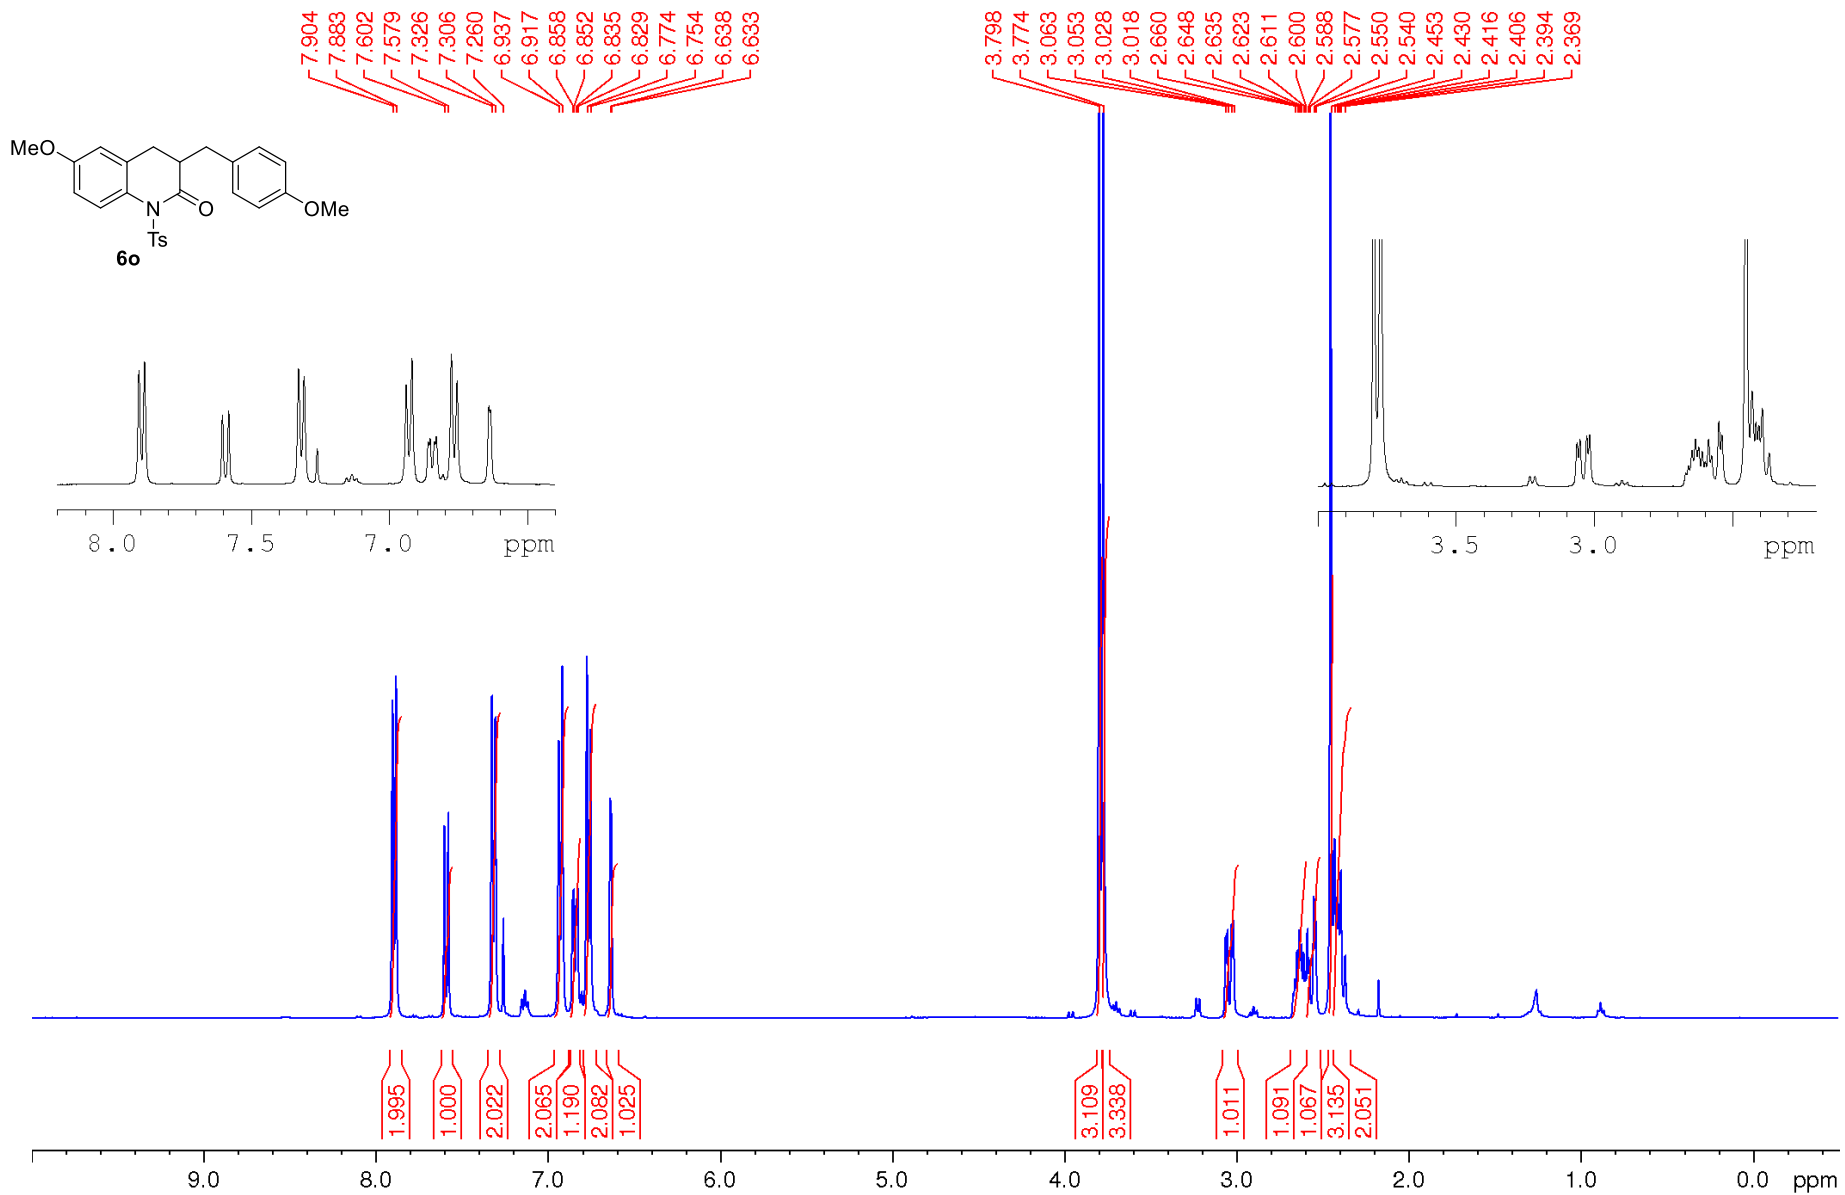

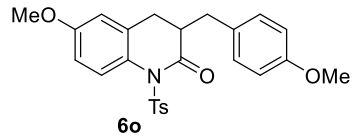

- 173.272
- 158.442
- 157.880
- 145.054
- 136.985
- 131.325
- 130.265
- 130.240
- 129.641
- 128.766
- 128.583
- 125.098
- 114.096
- 113.578
- 112.092
- 55.722
- 55.438
- 46.236
- 33.972
- 29.816
- 21.927

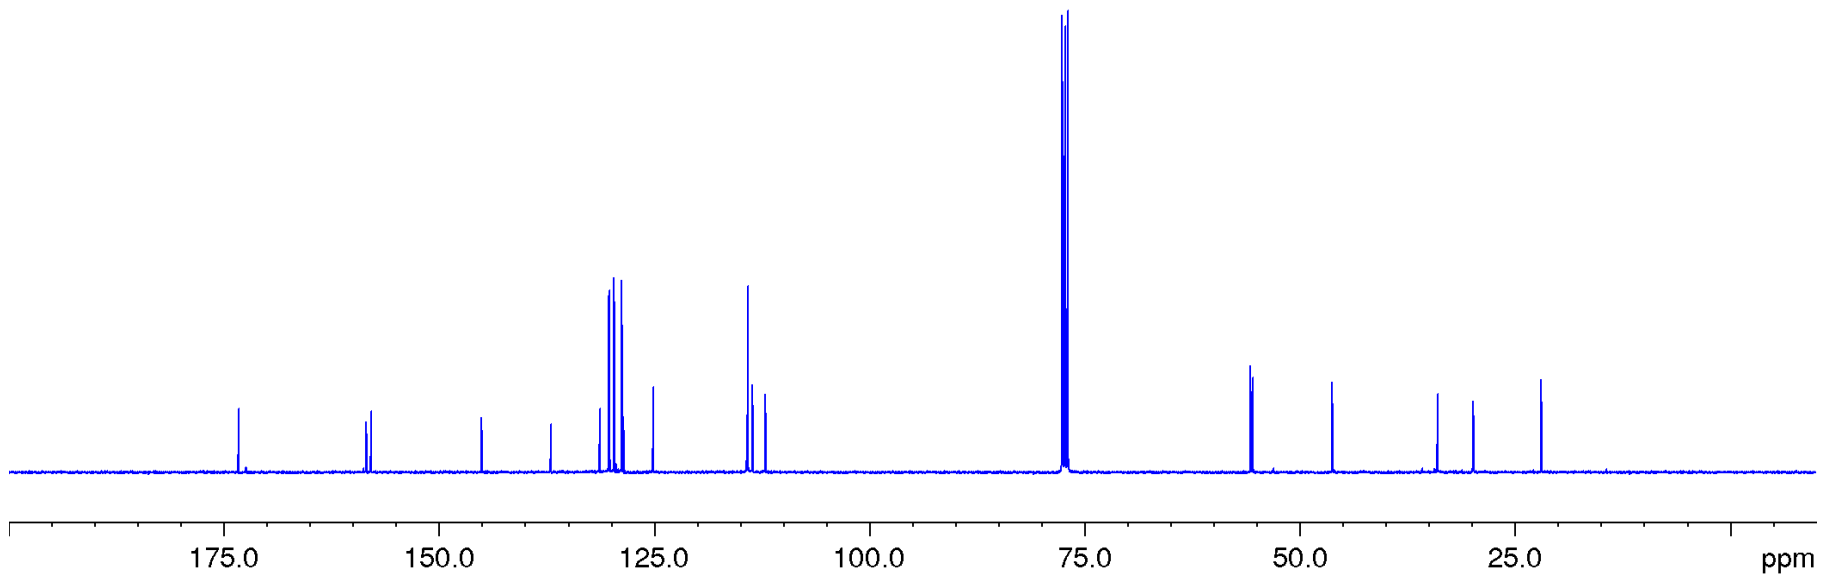

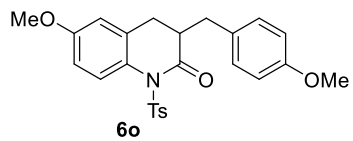

130.238  
129.638  
128.763  
125.095  
114.094  
113.575  
112.090  
55.719  
55.436  
46.232  
33.969  
29.812  
21.924

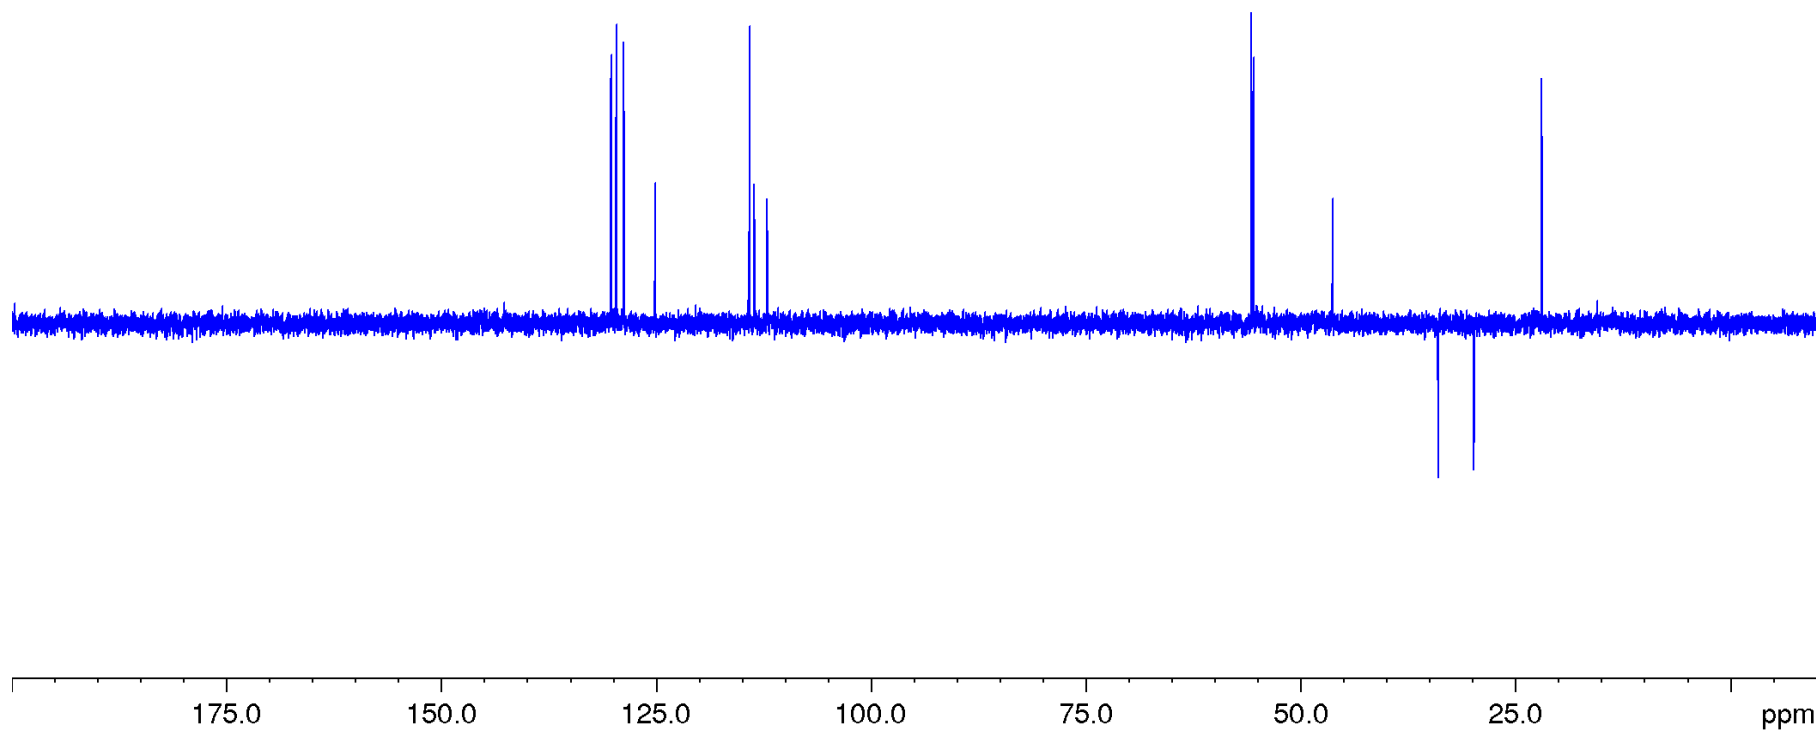

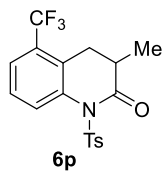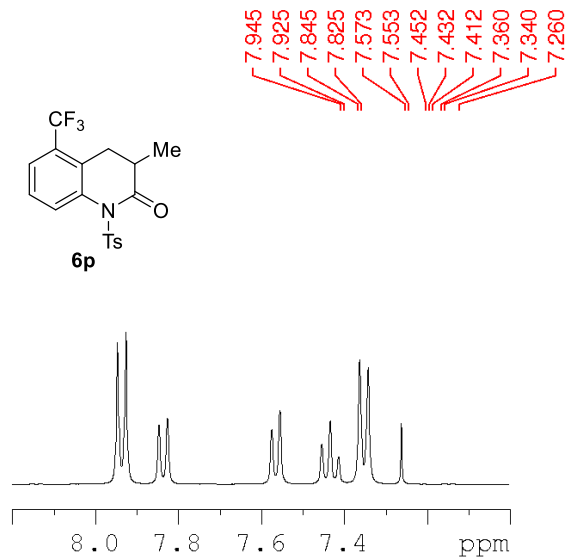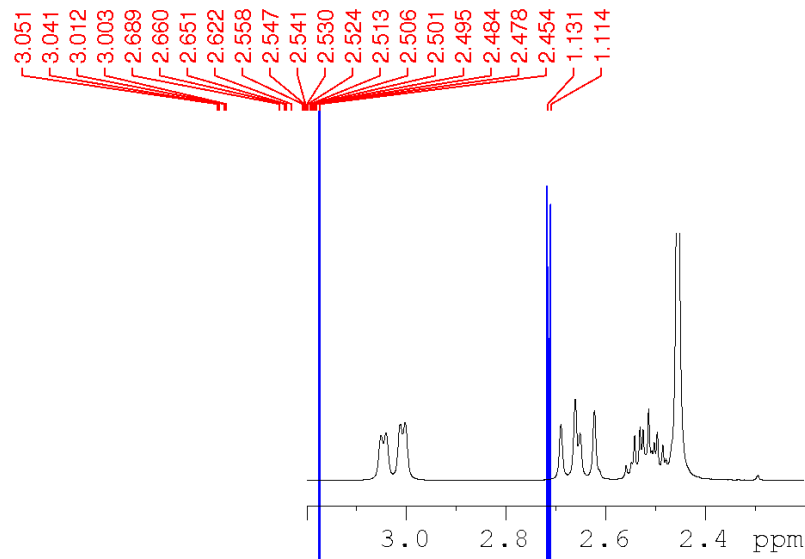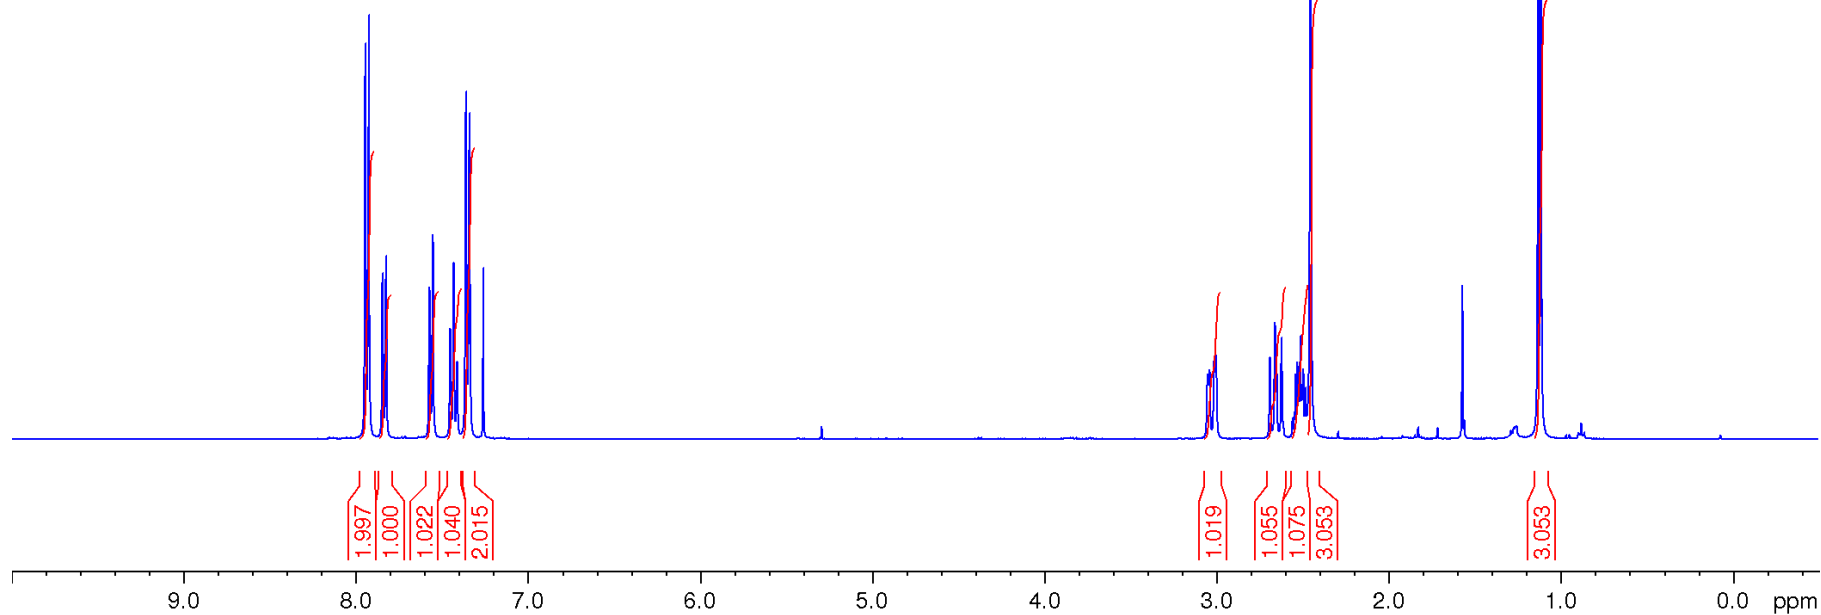

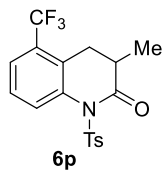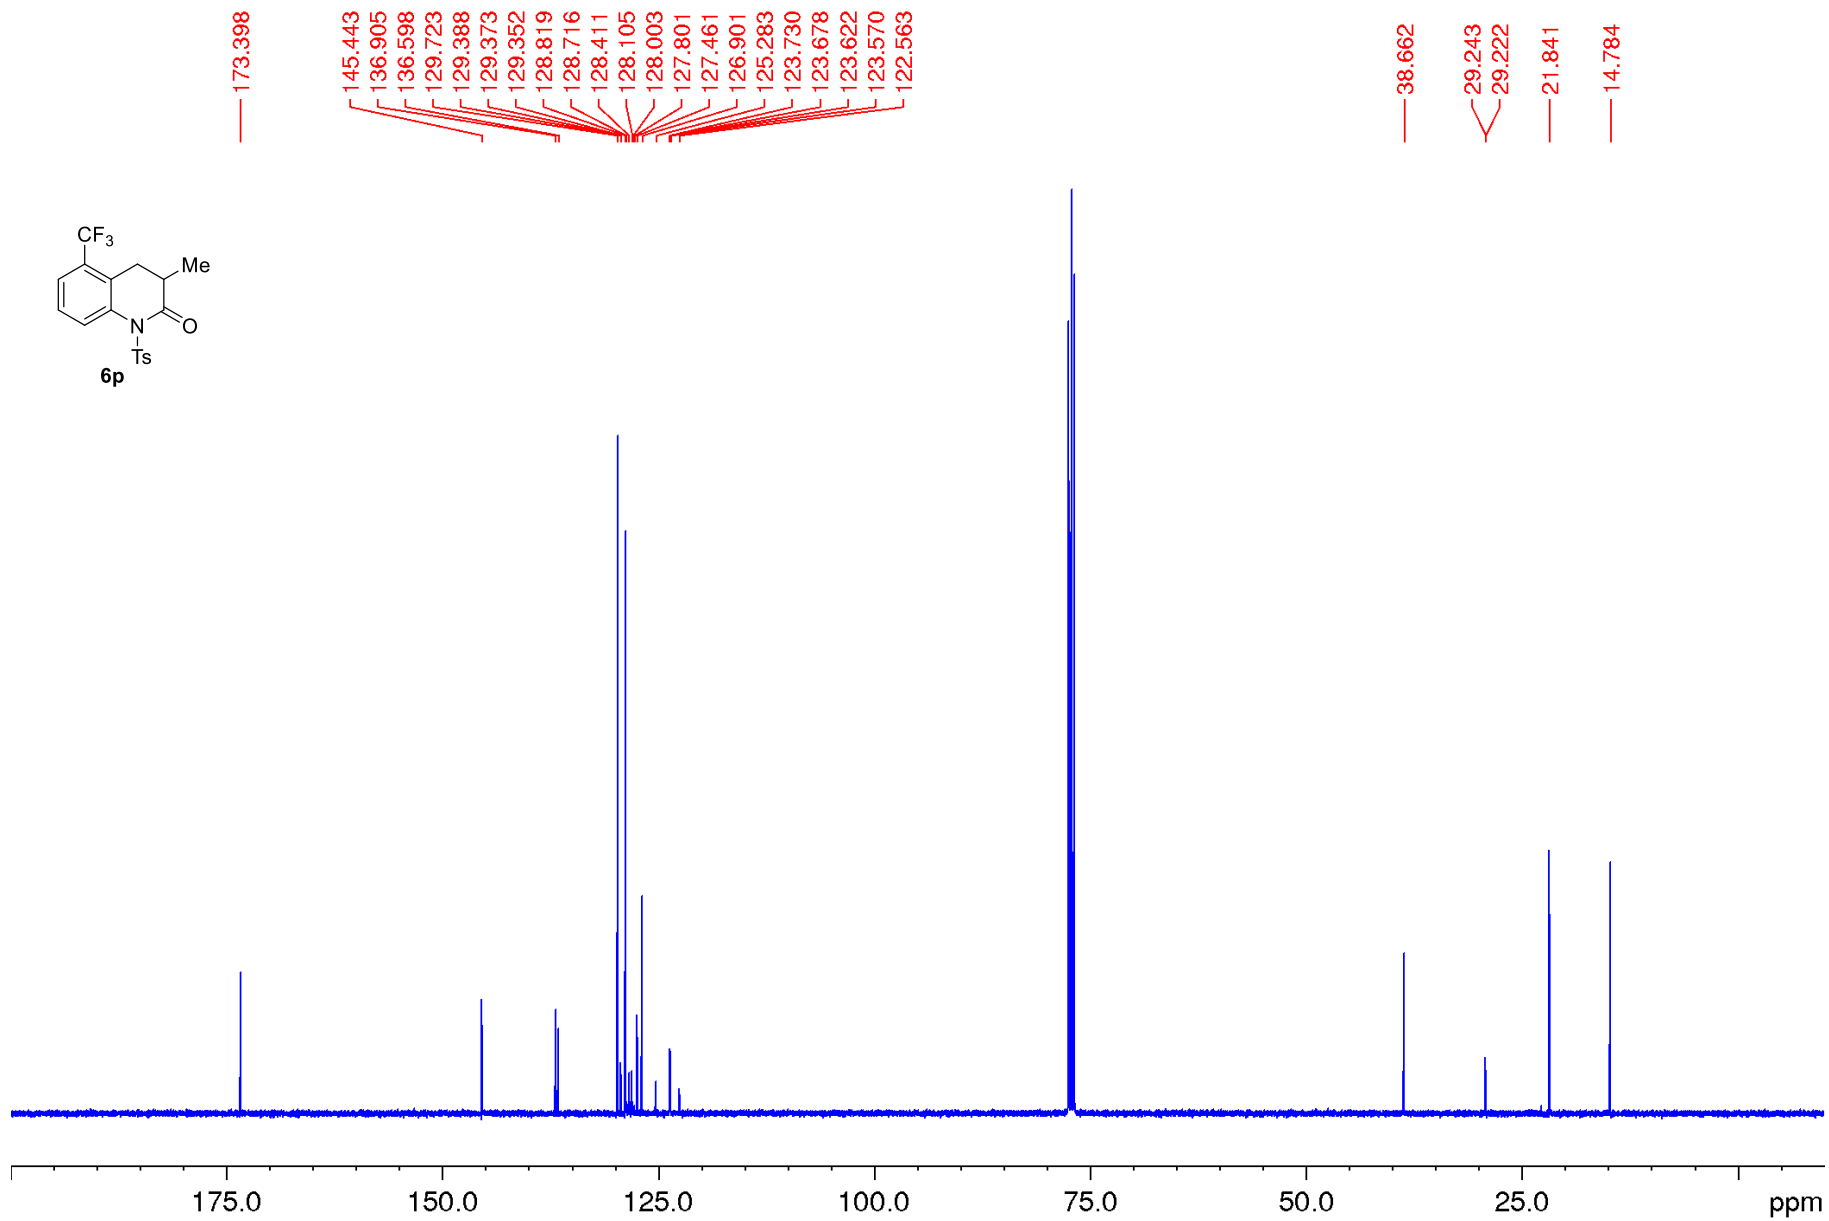

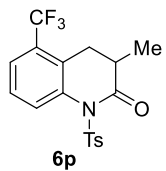

129.759  
128.833  
127.475  
126.928  
123.706  
123.653

38.662  
29.243  
21.888  
14.810

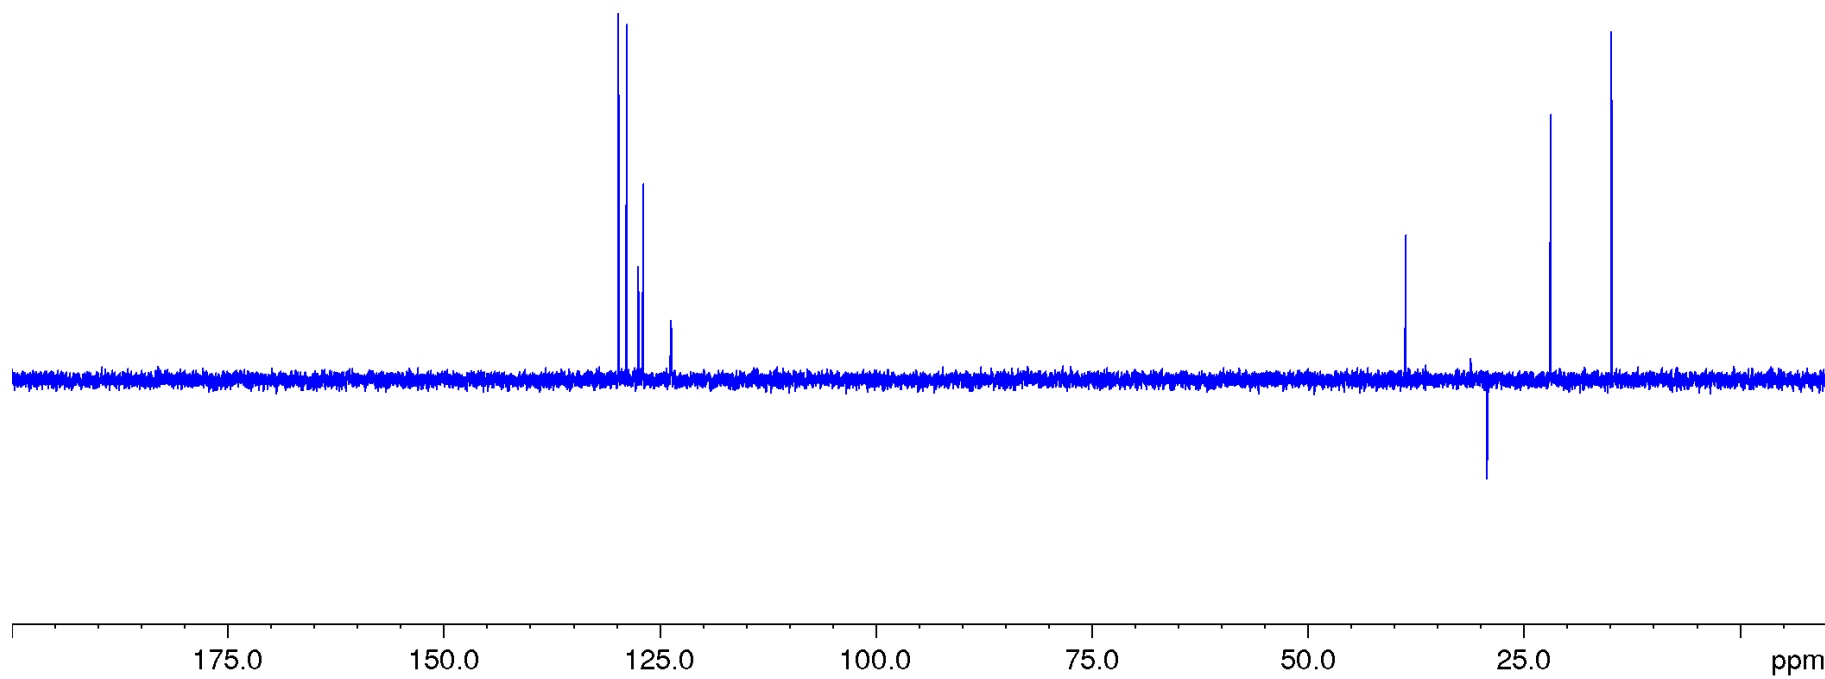

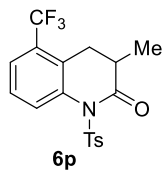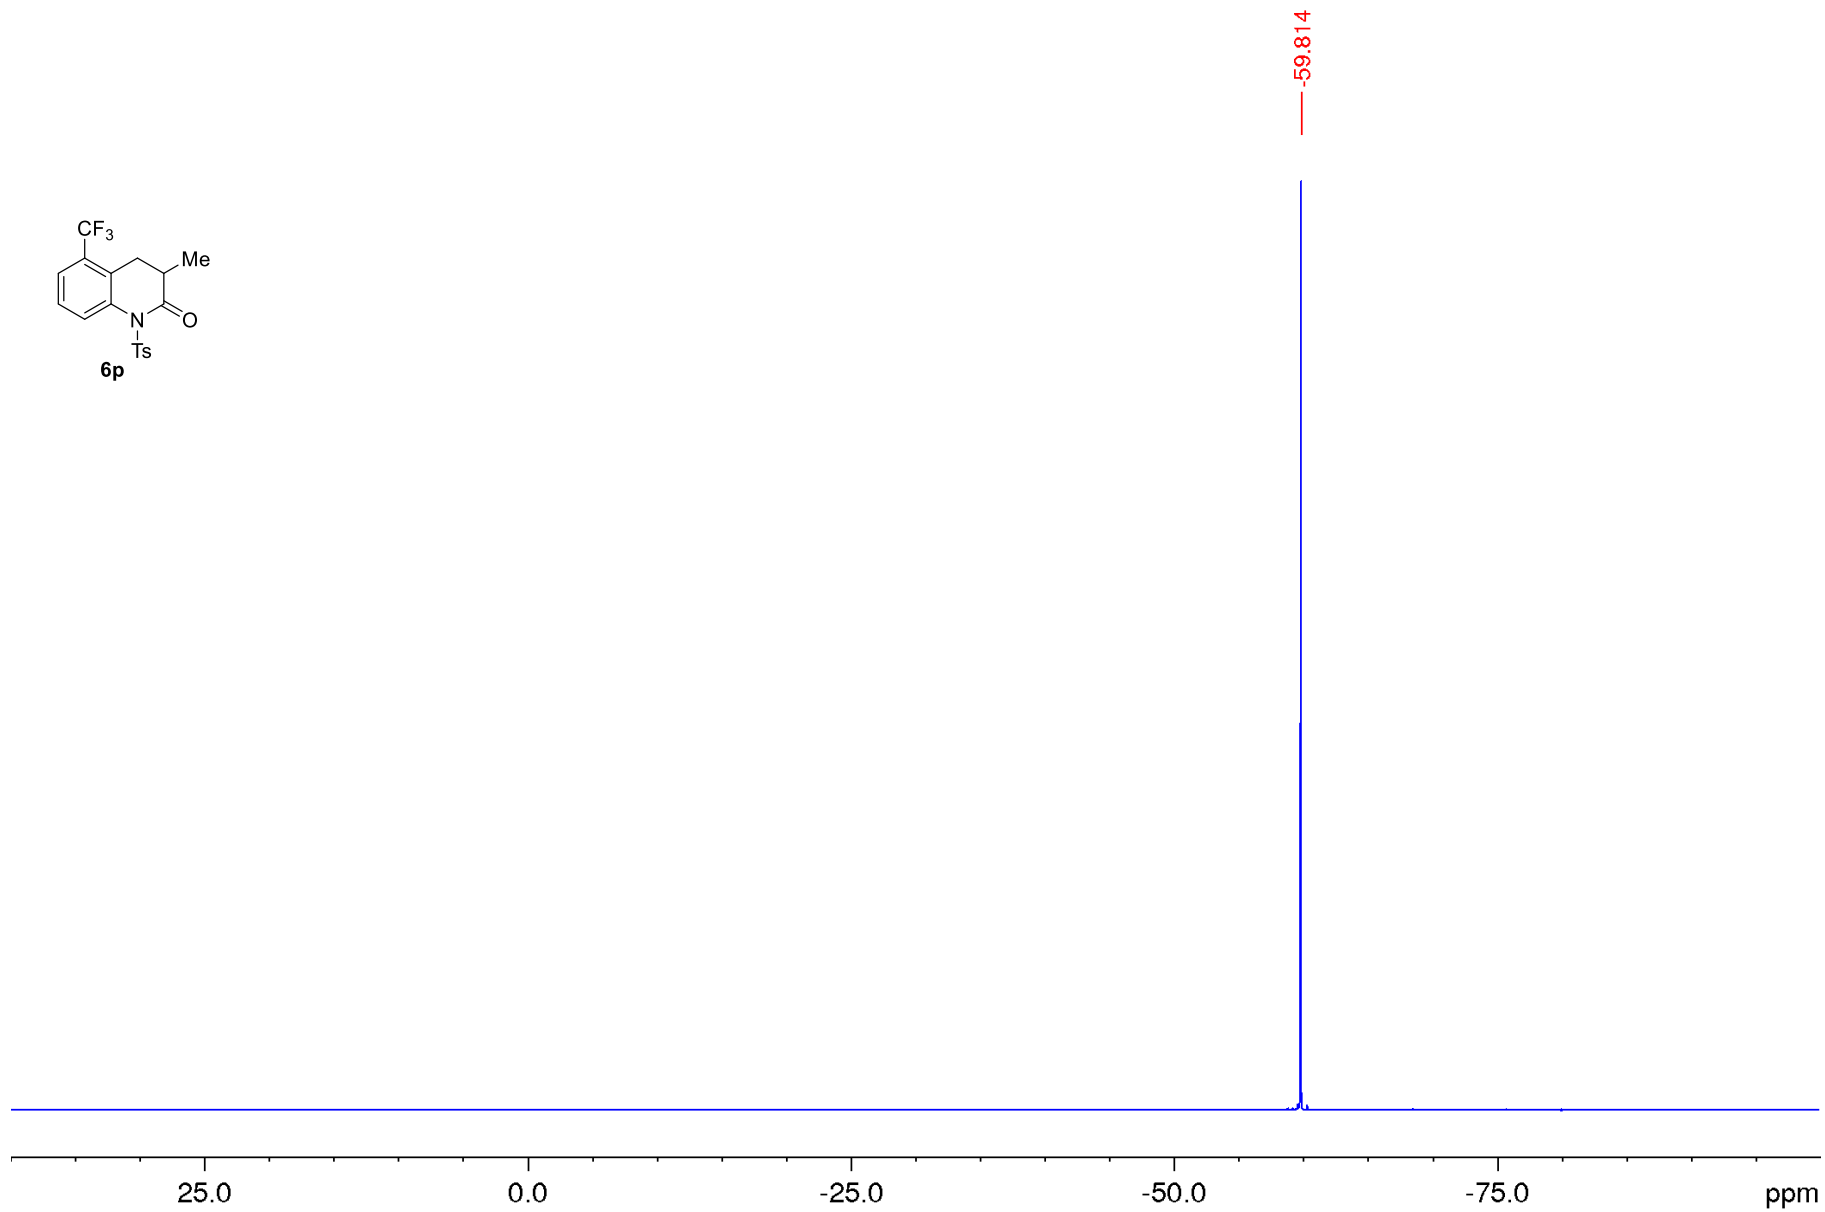



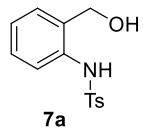

7.912  
7.672  
7.651  
7.453  
7.433  
7.295  
7.284  
7.273  
7.267  
7.245  
7.225  
7.114  
7.106  
7.100

4.421  
4.408

2.402  
2.221

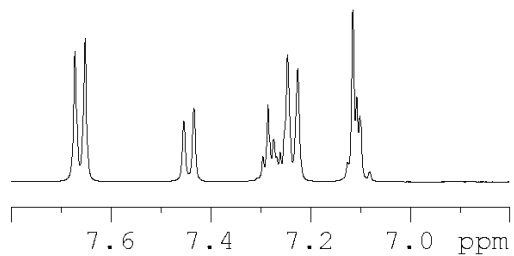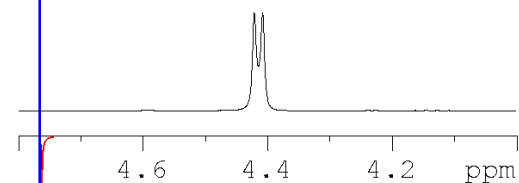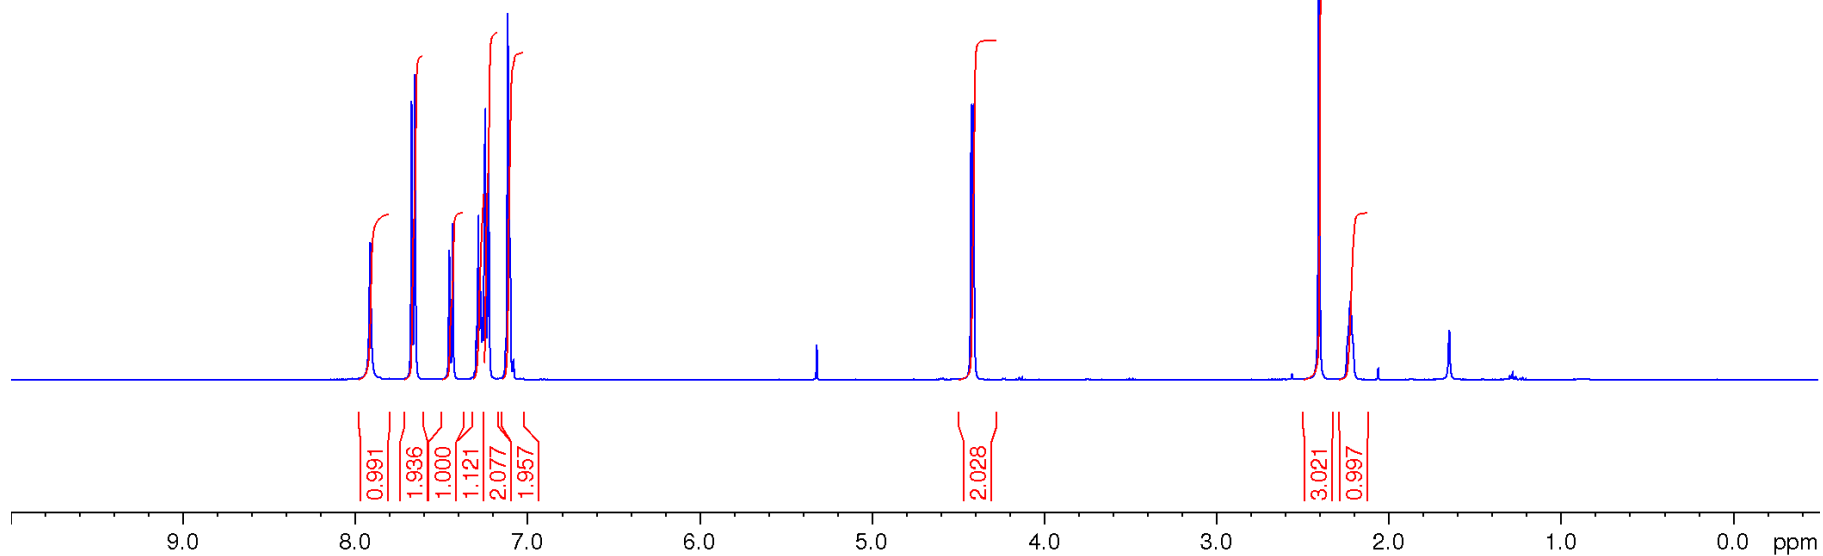

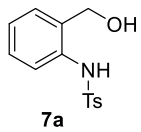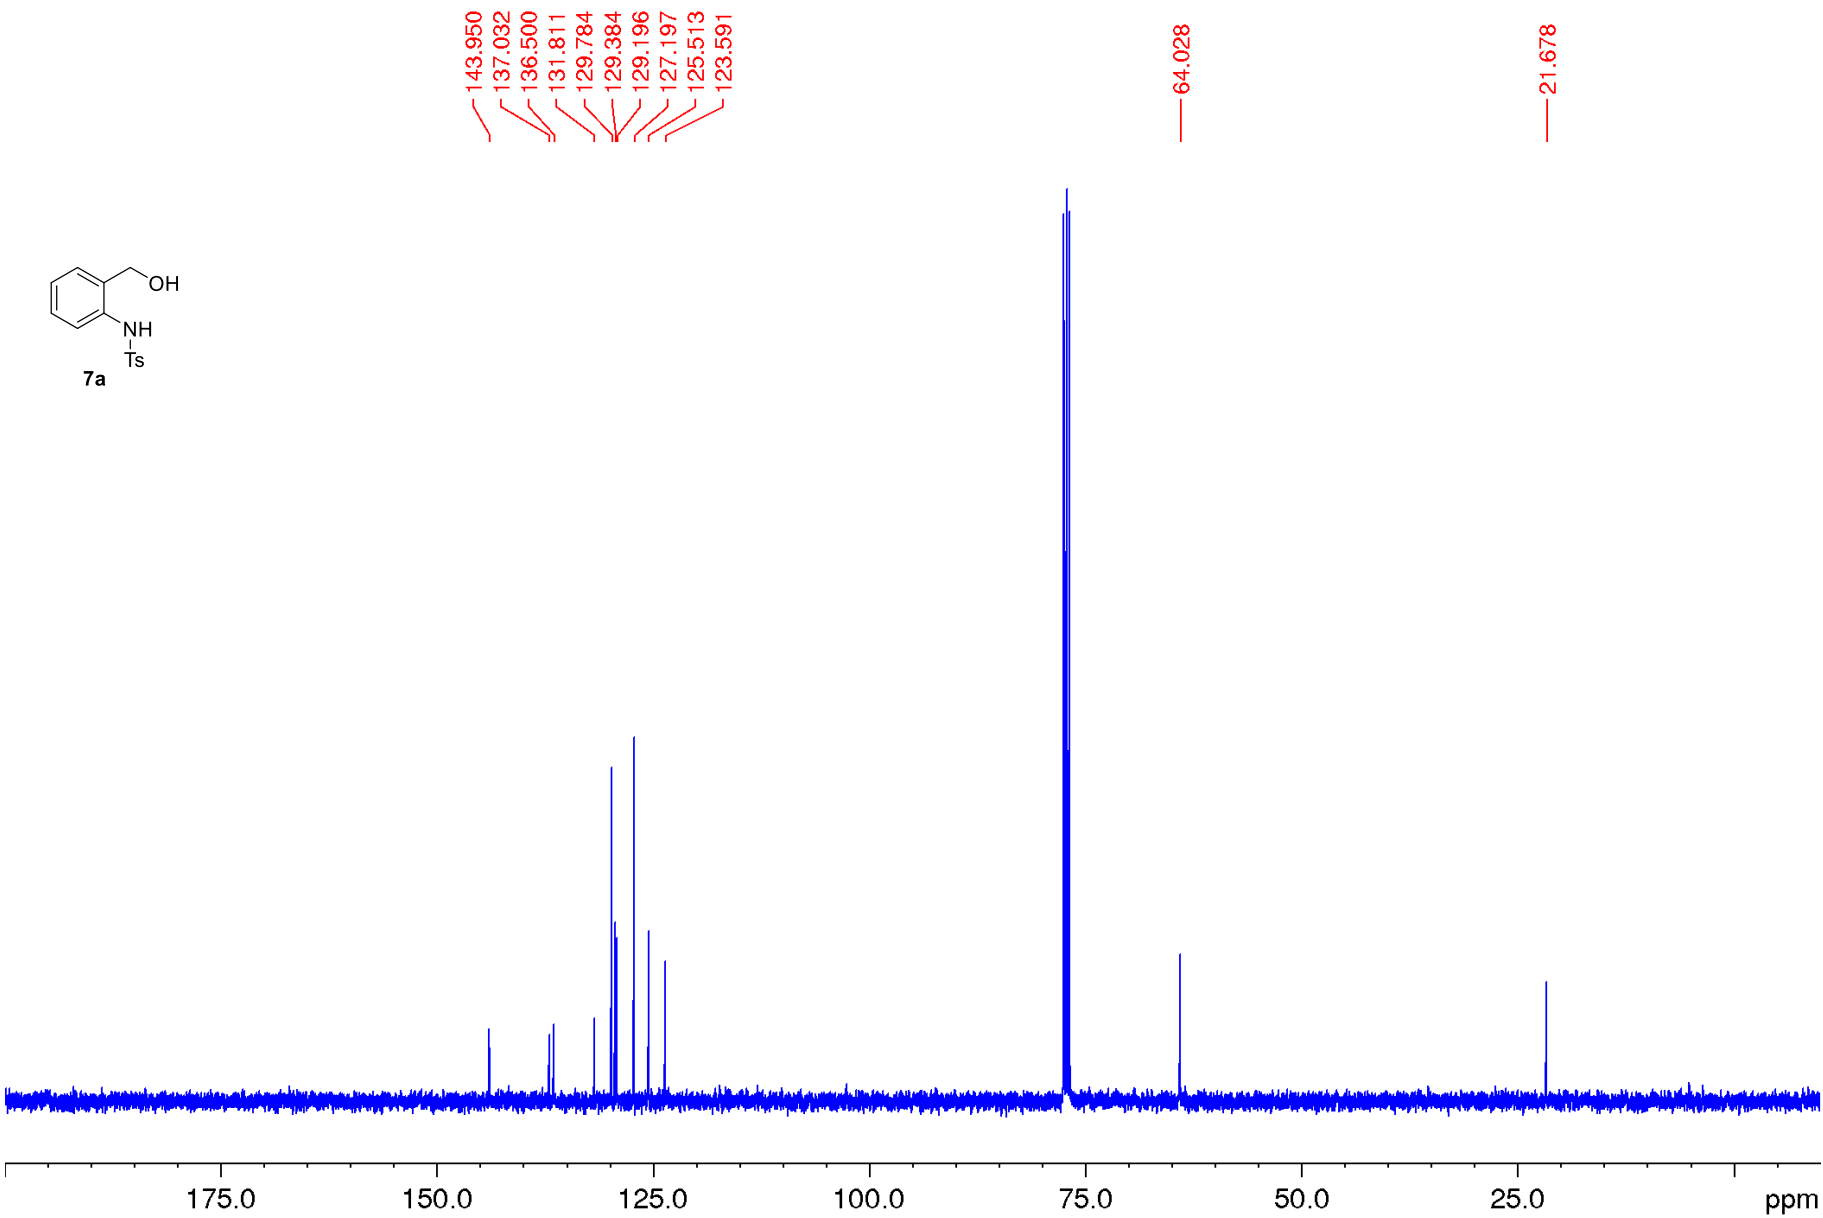

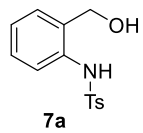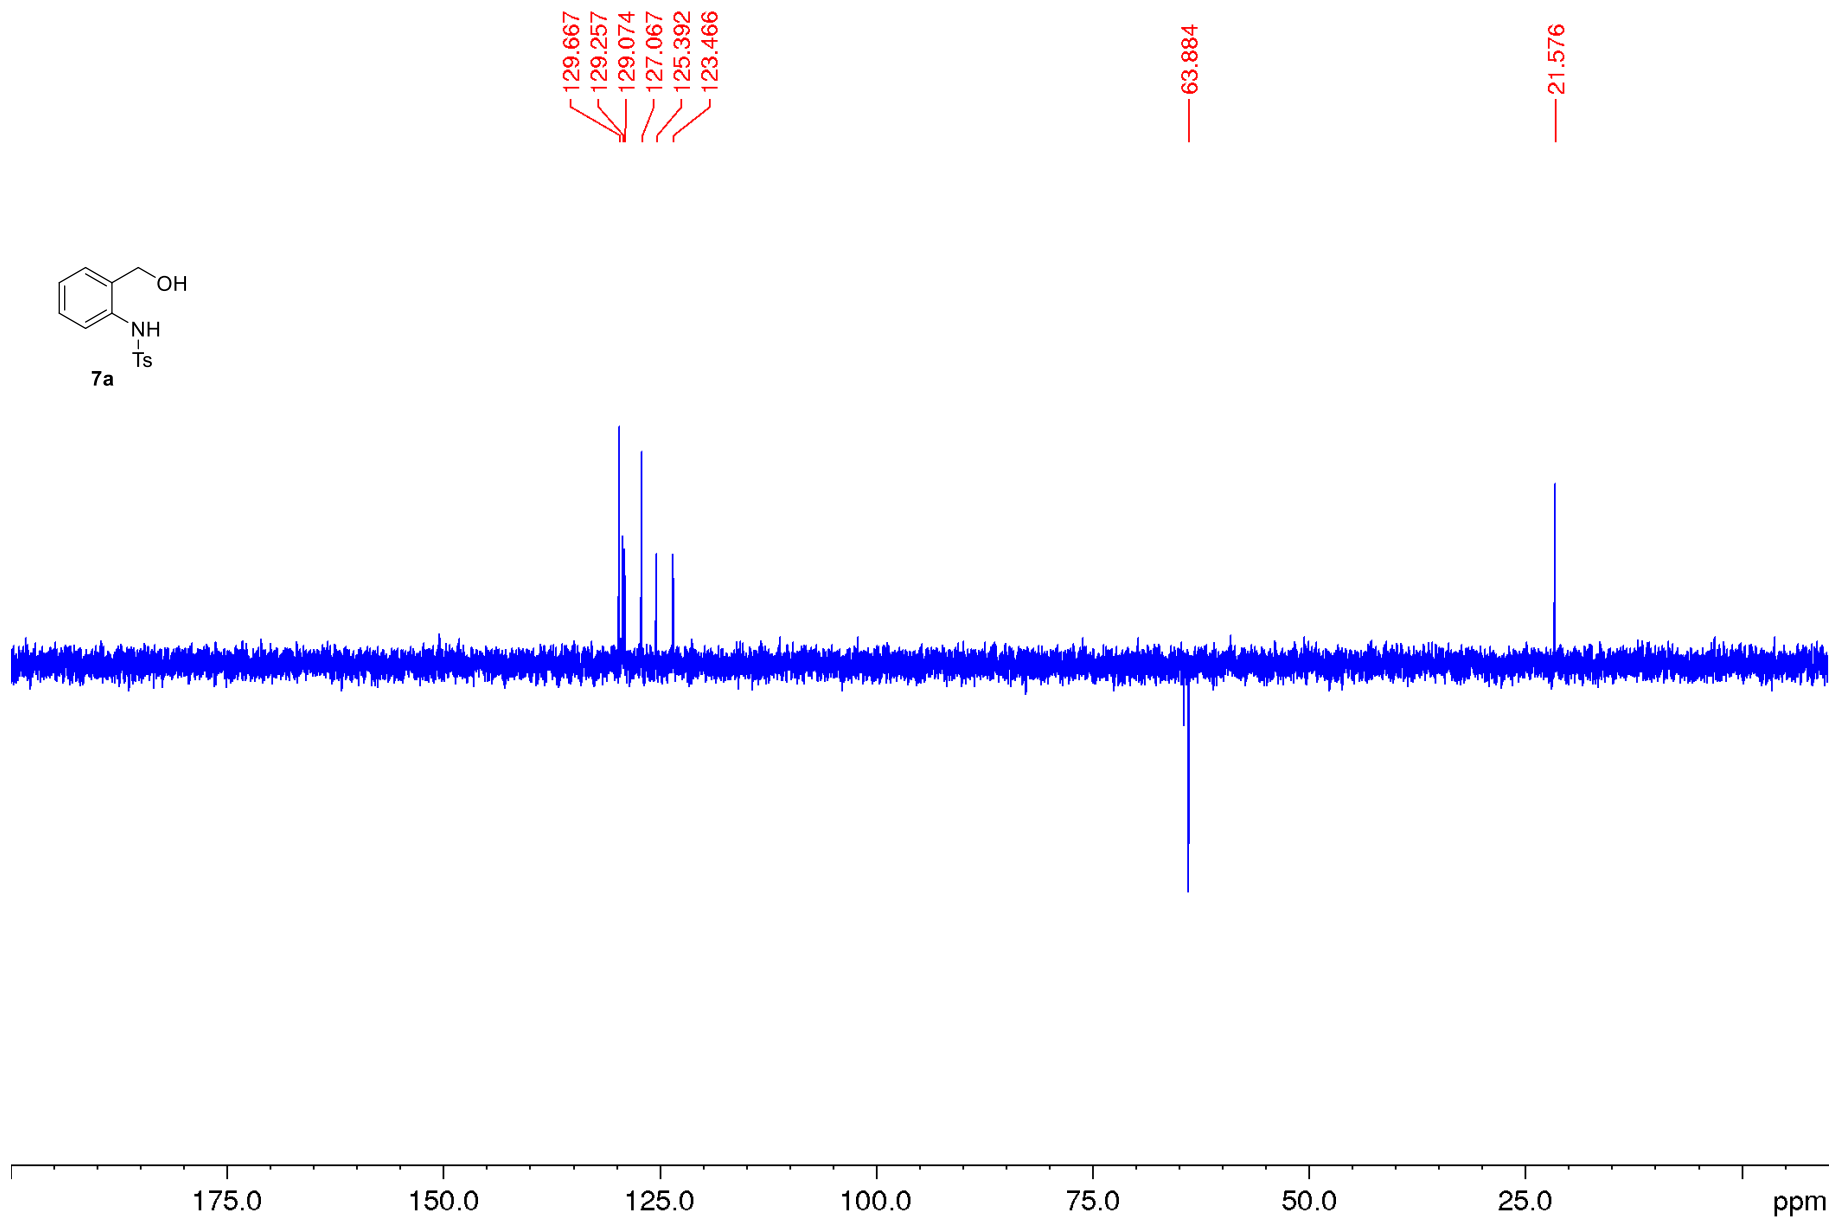

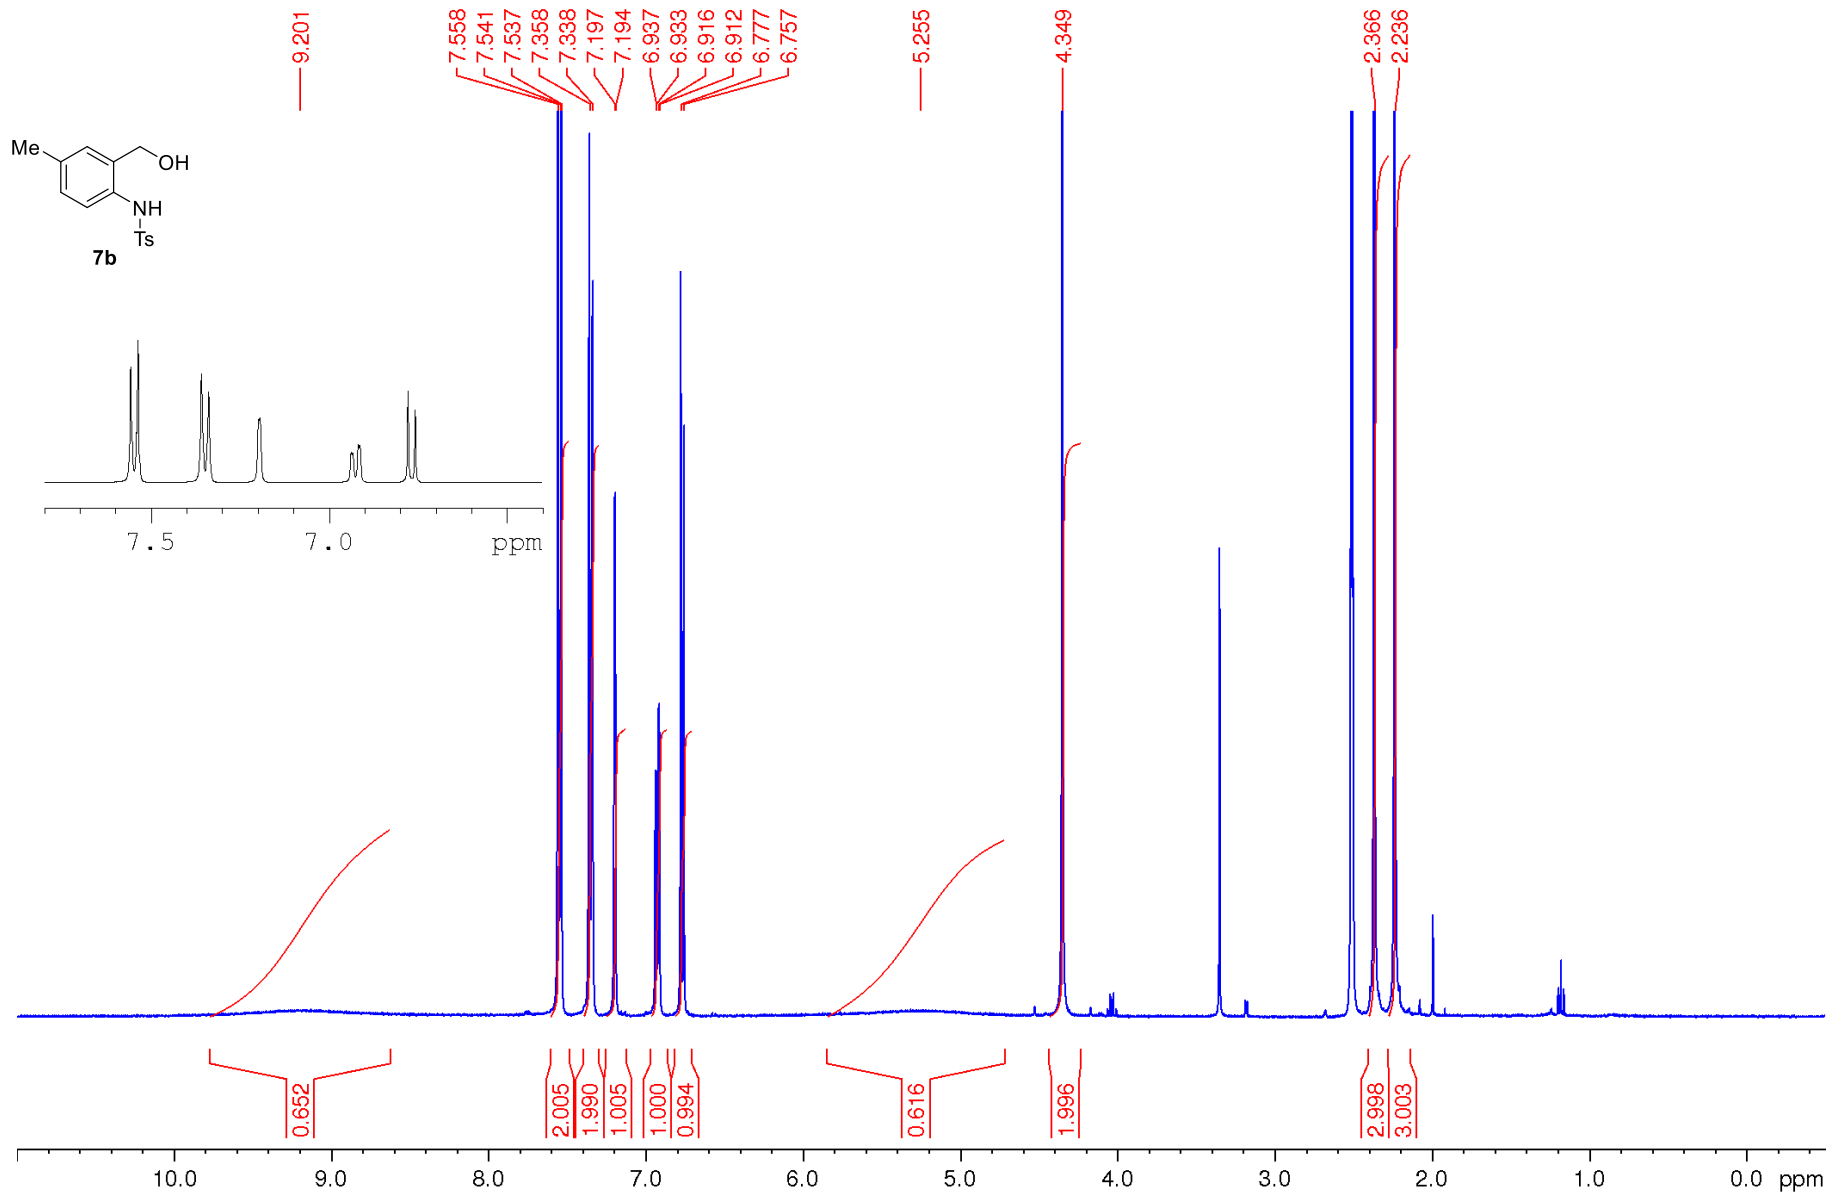

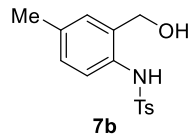

143.492  
138.356  
137.868  
135.840  
131.372  
130.052  
128.388  
127.959  
127.157  
125.836

59.775

21.456  
21.118

175.0

150.0

125.0

100.0

75.0

50.0

25.0

ppm

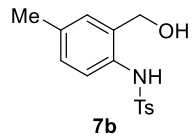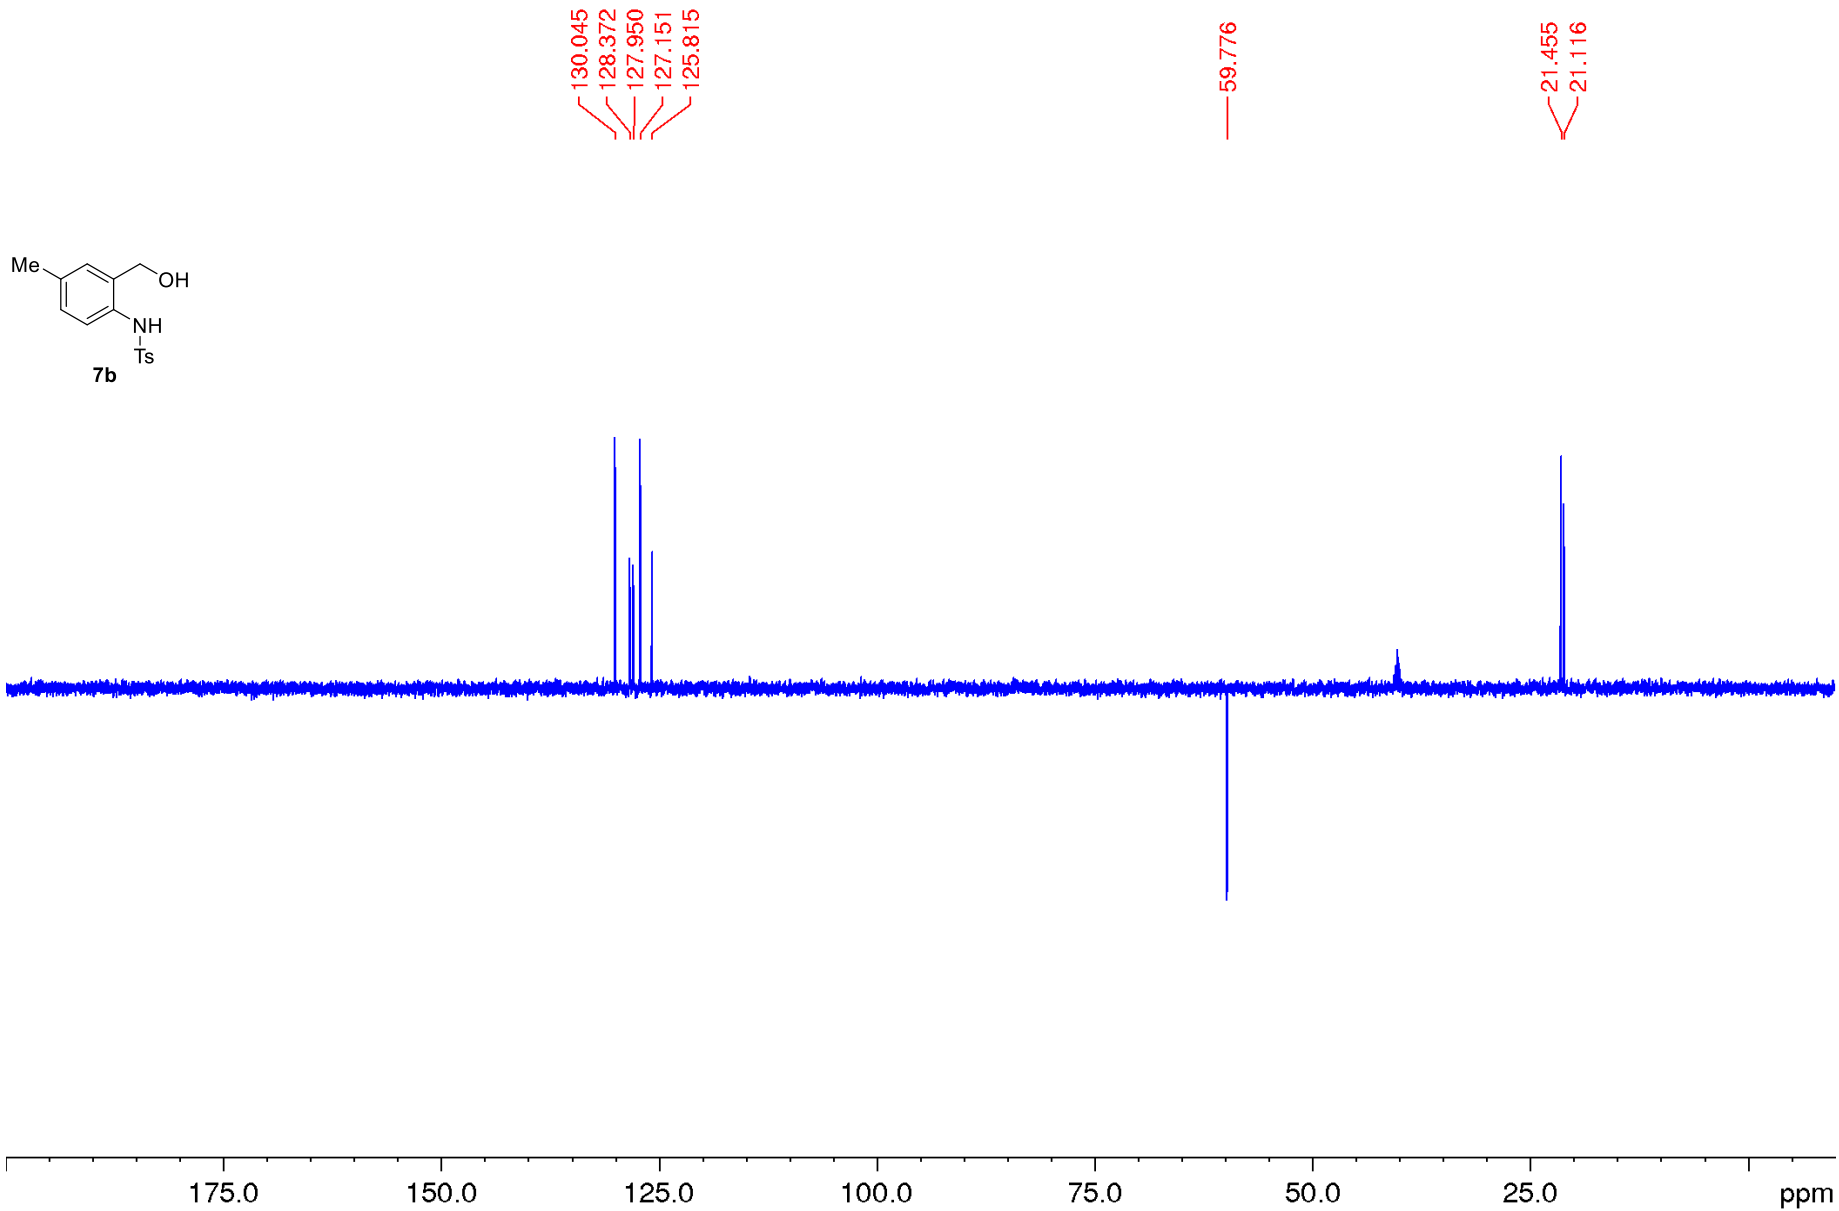

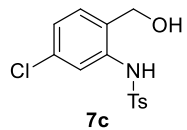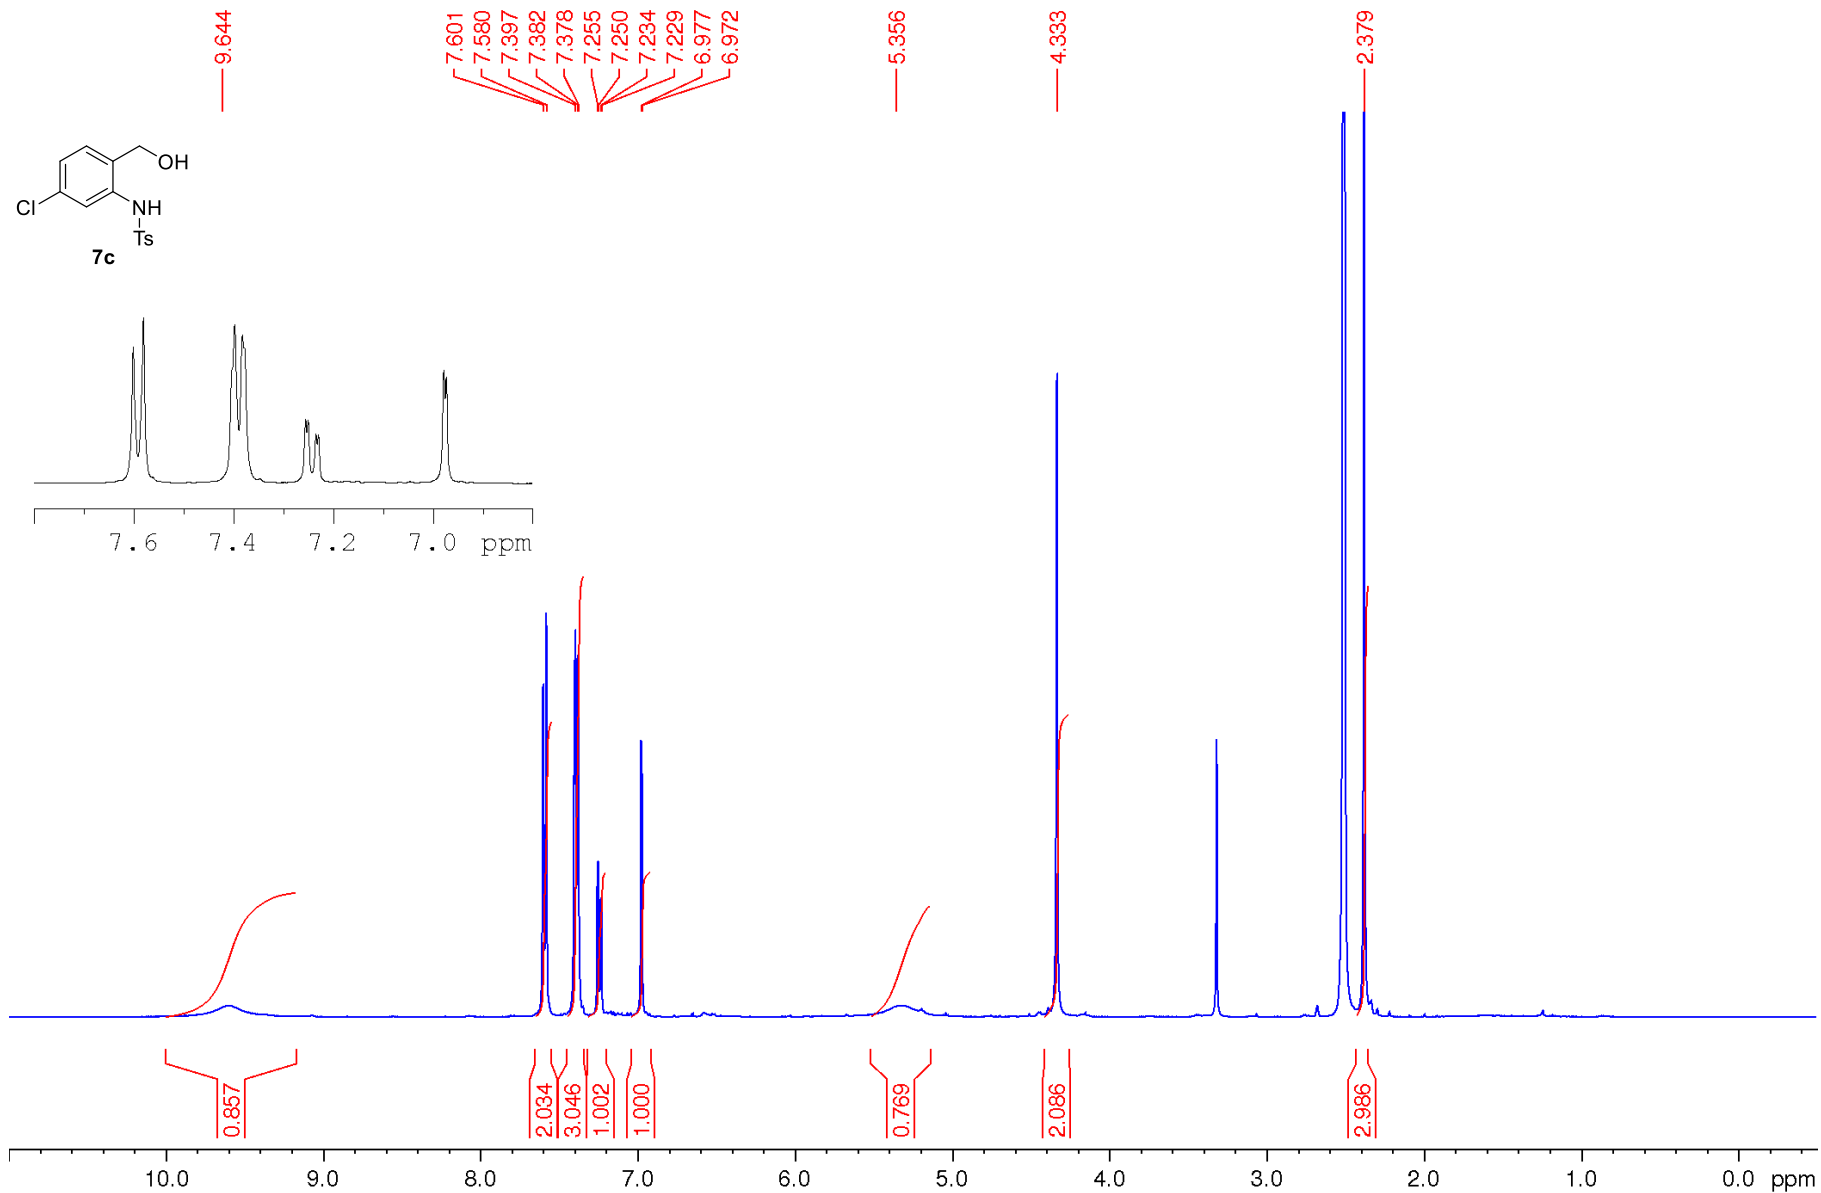

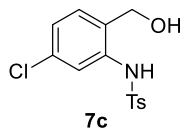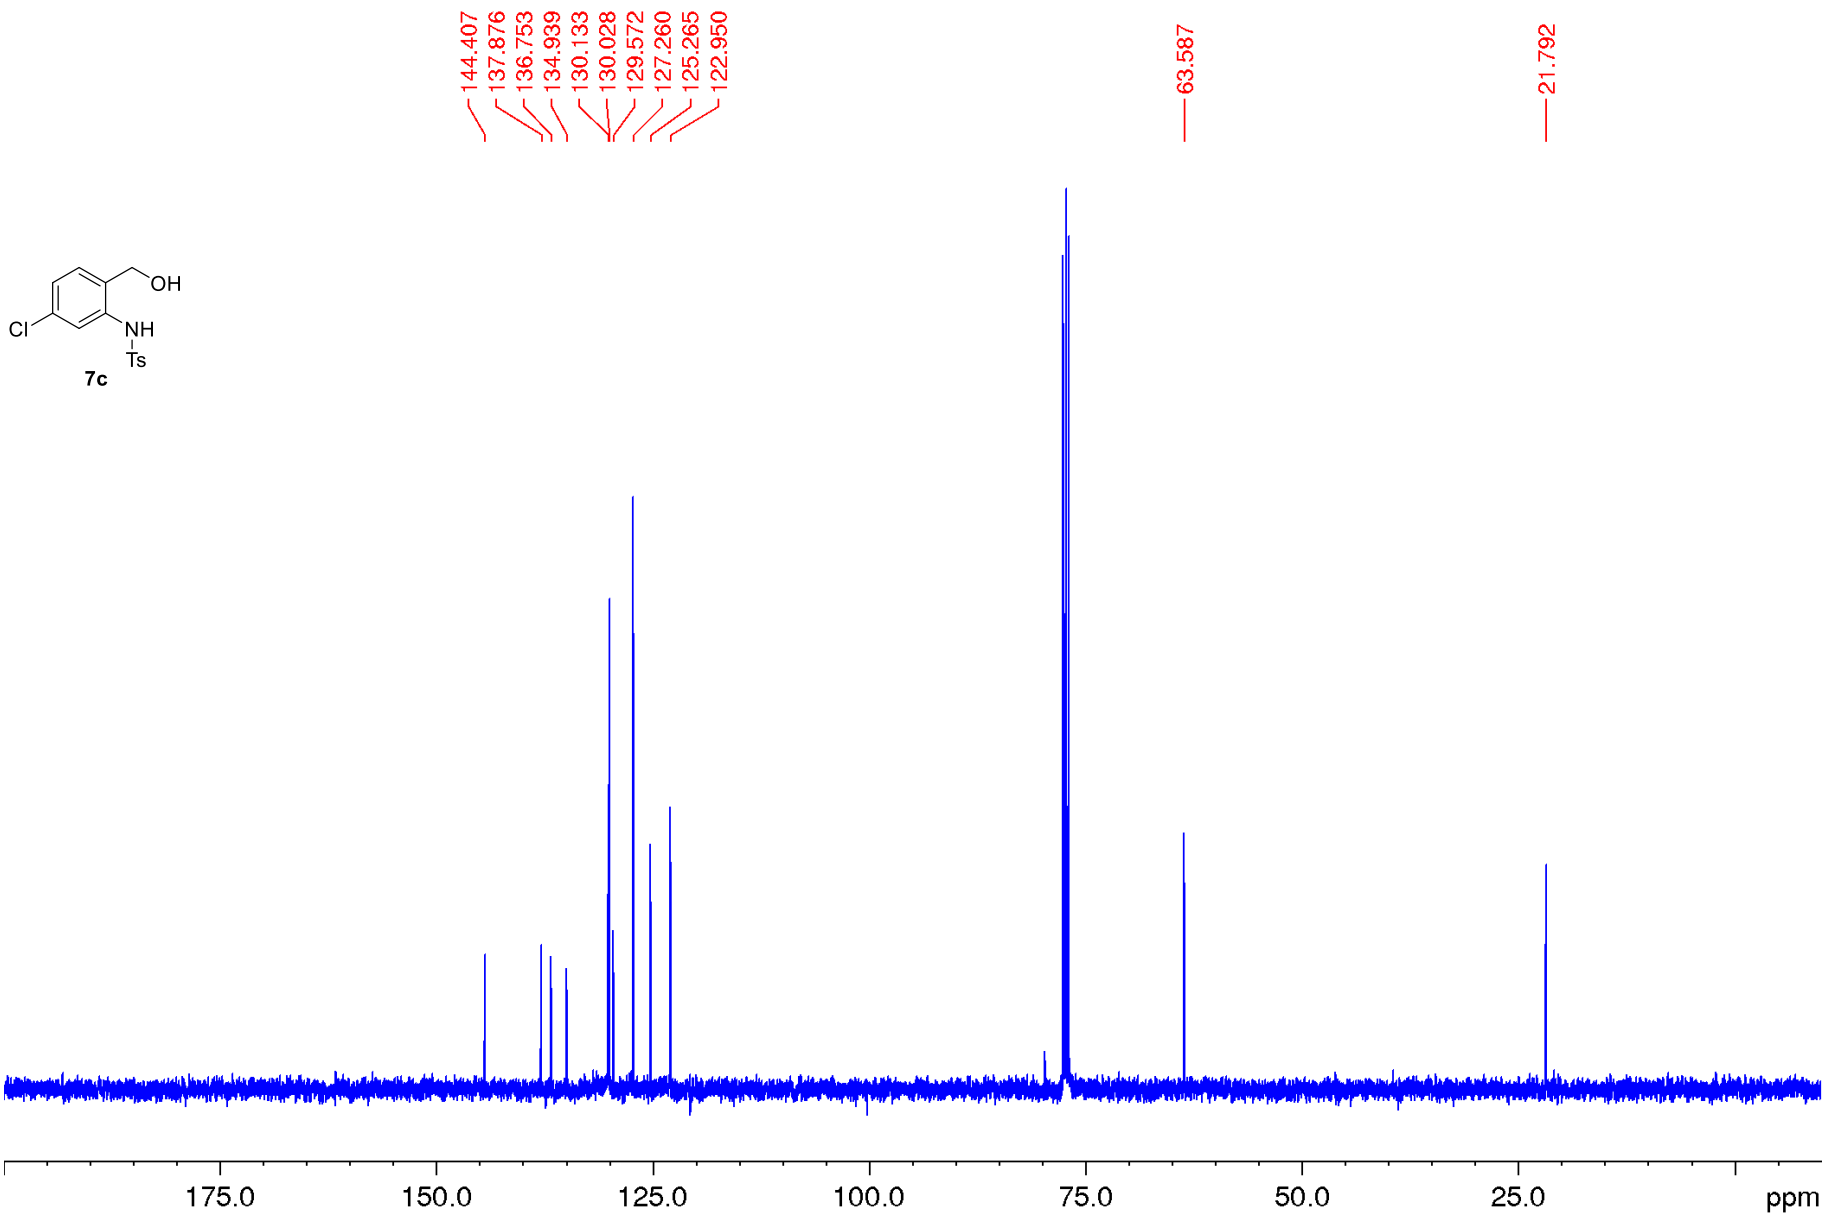

S100



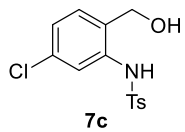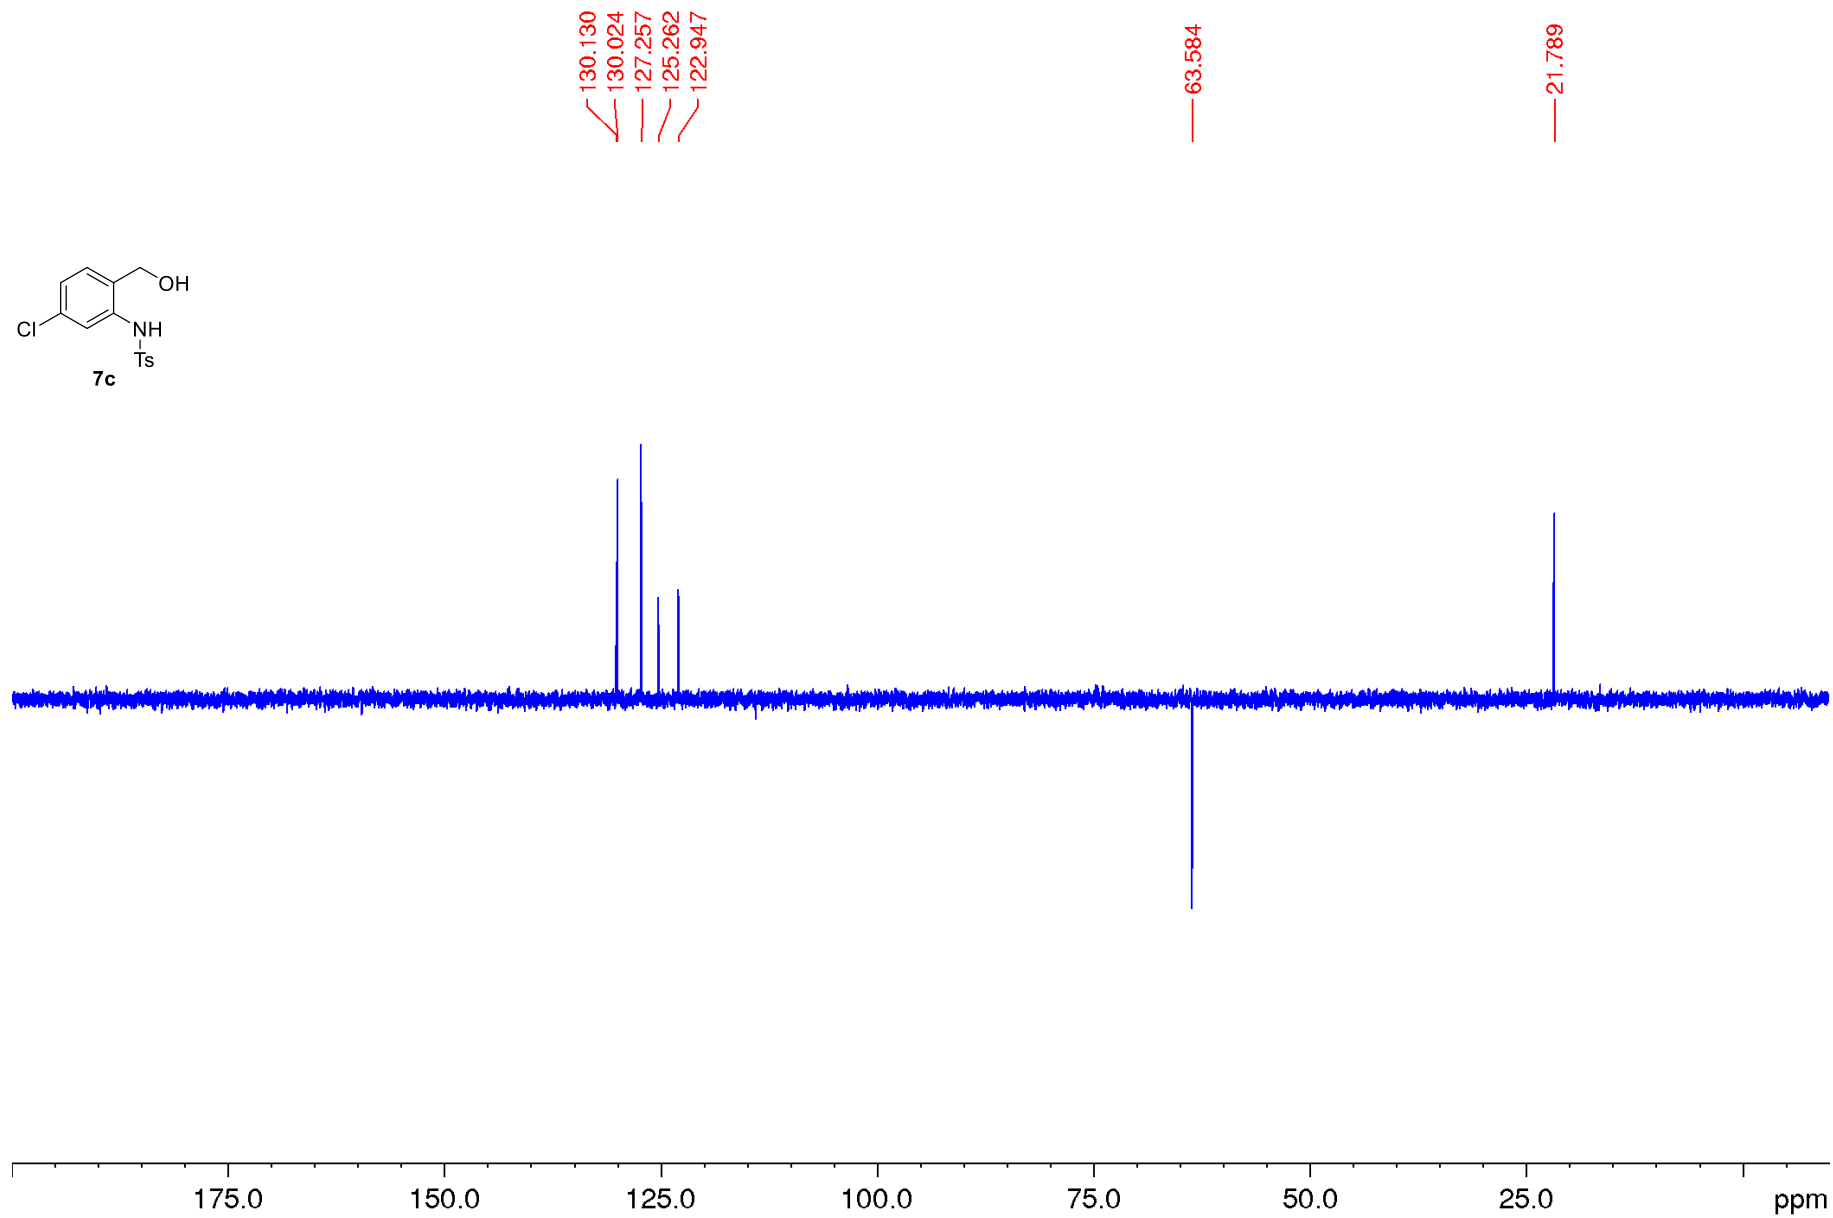

S101

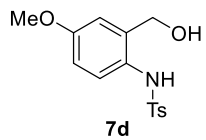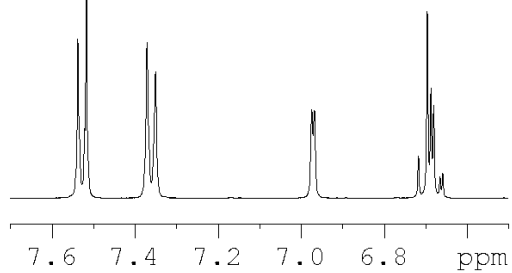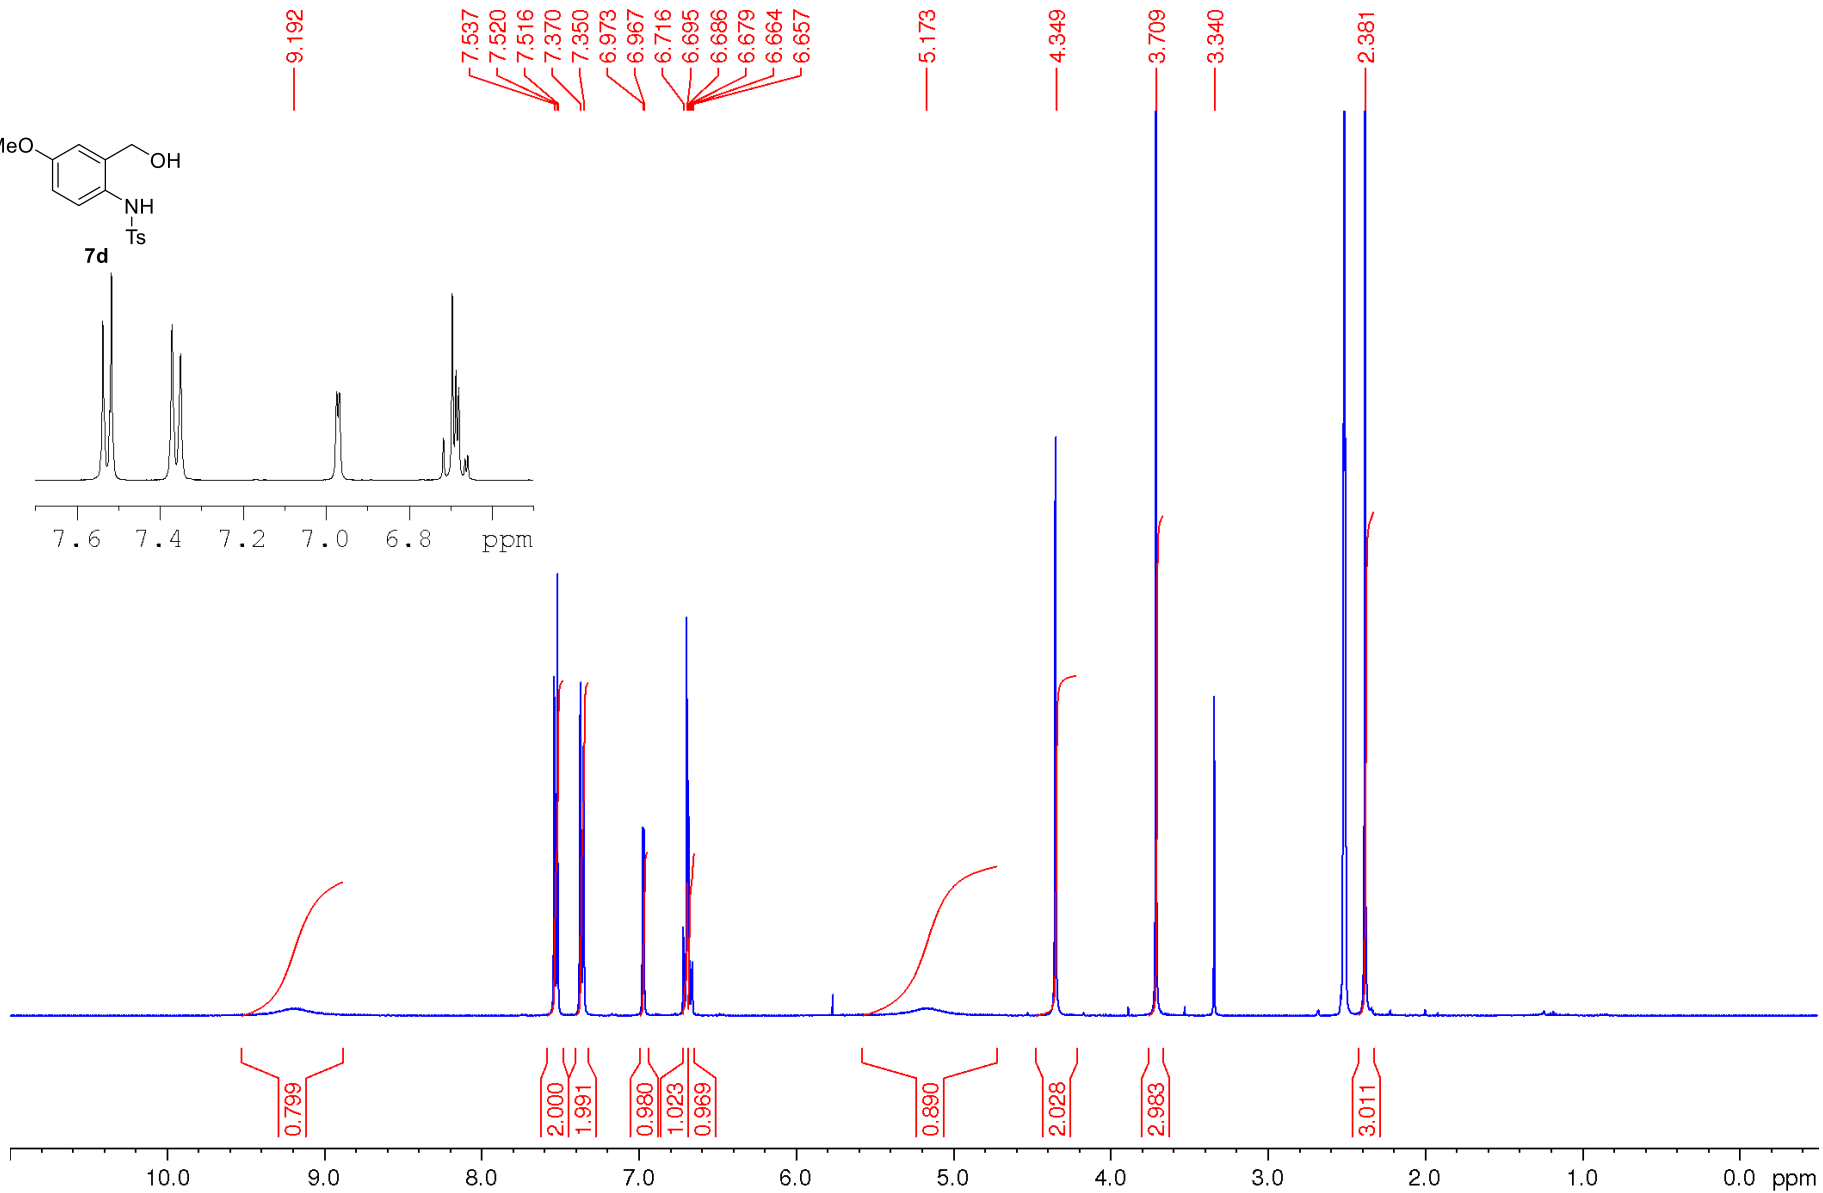

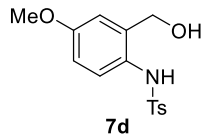

158.355  
143.401  
141.636  
137.921  
130.035  
128.332  
127.176  
126.052  
112.692  
112.398  
59.502  
55.576  
21.476

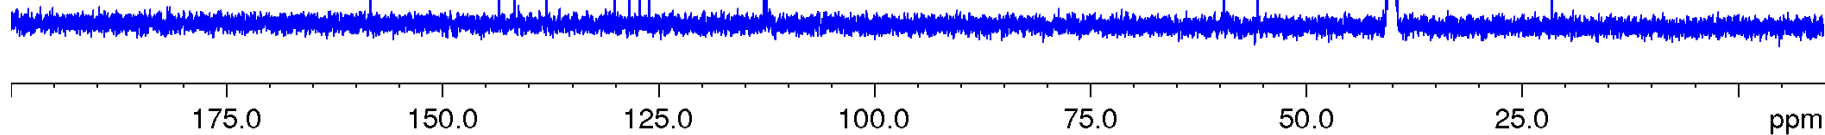

S103

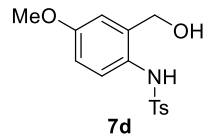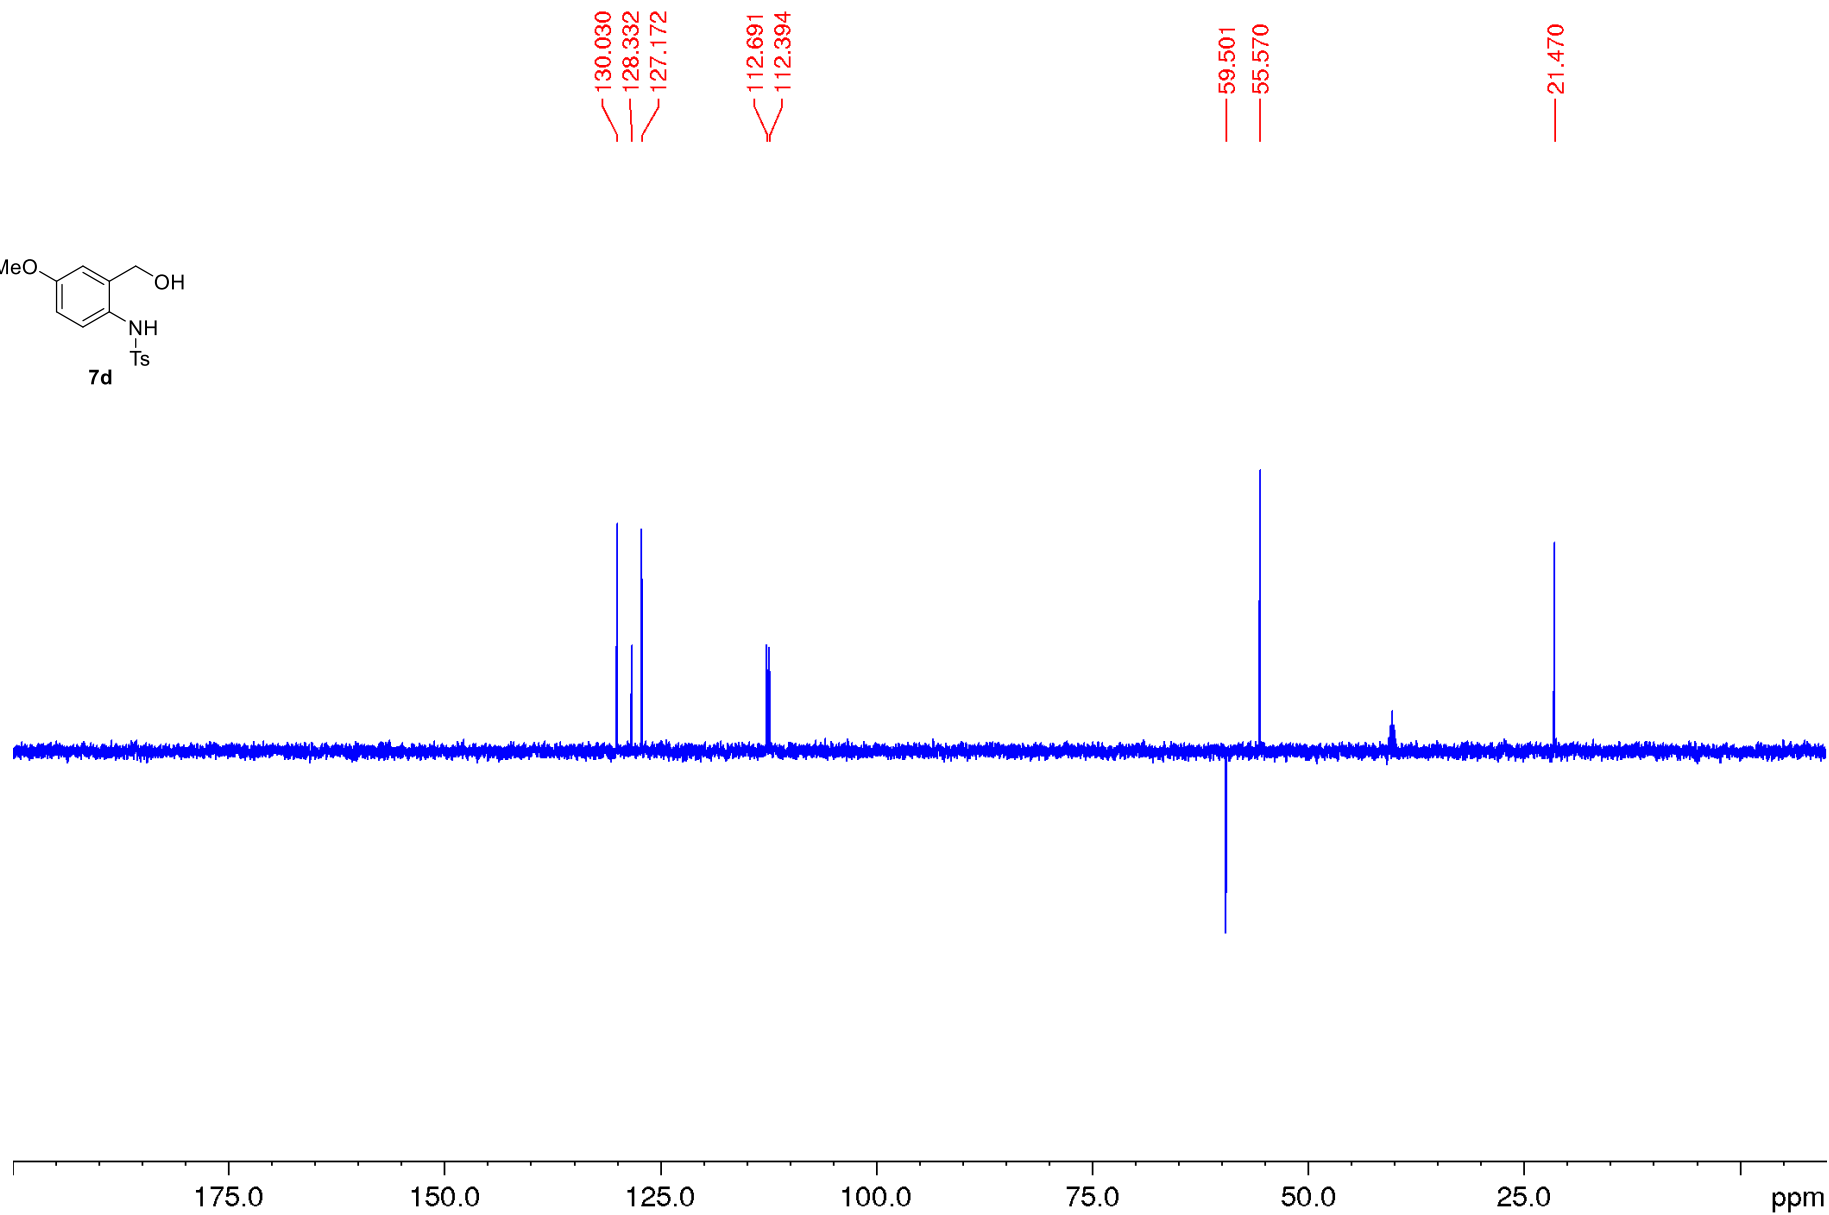

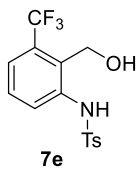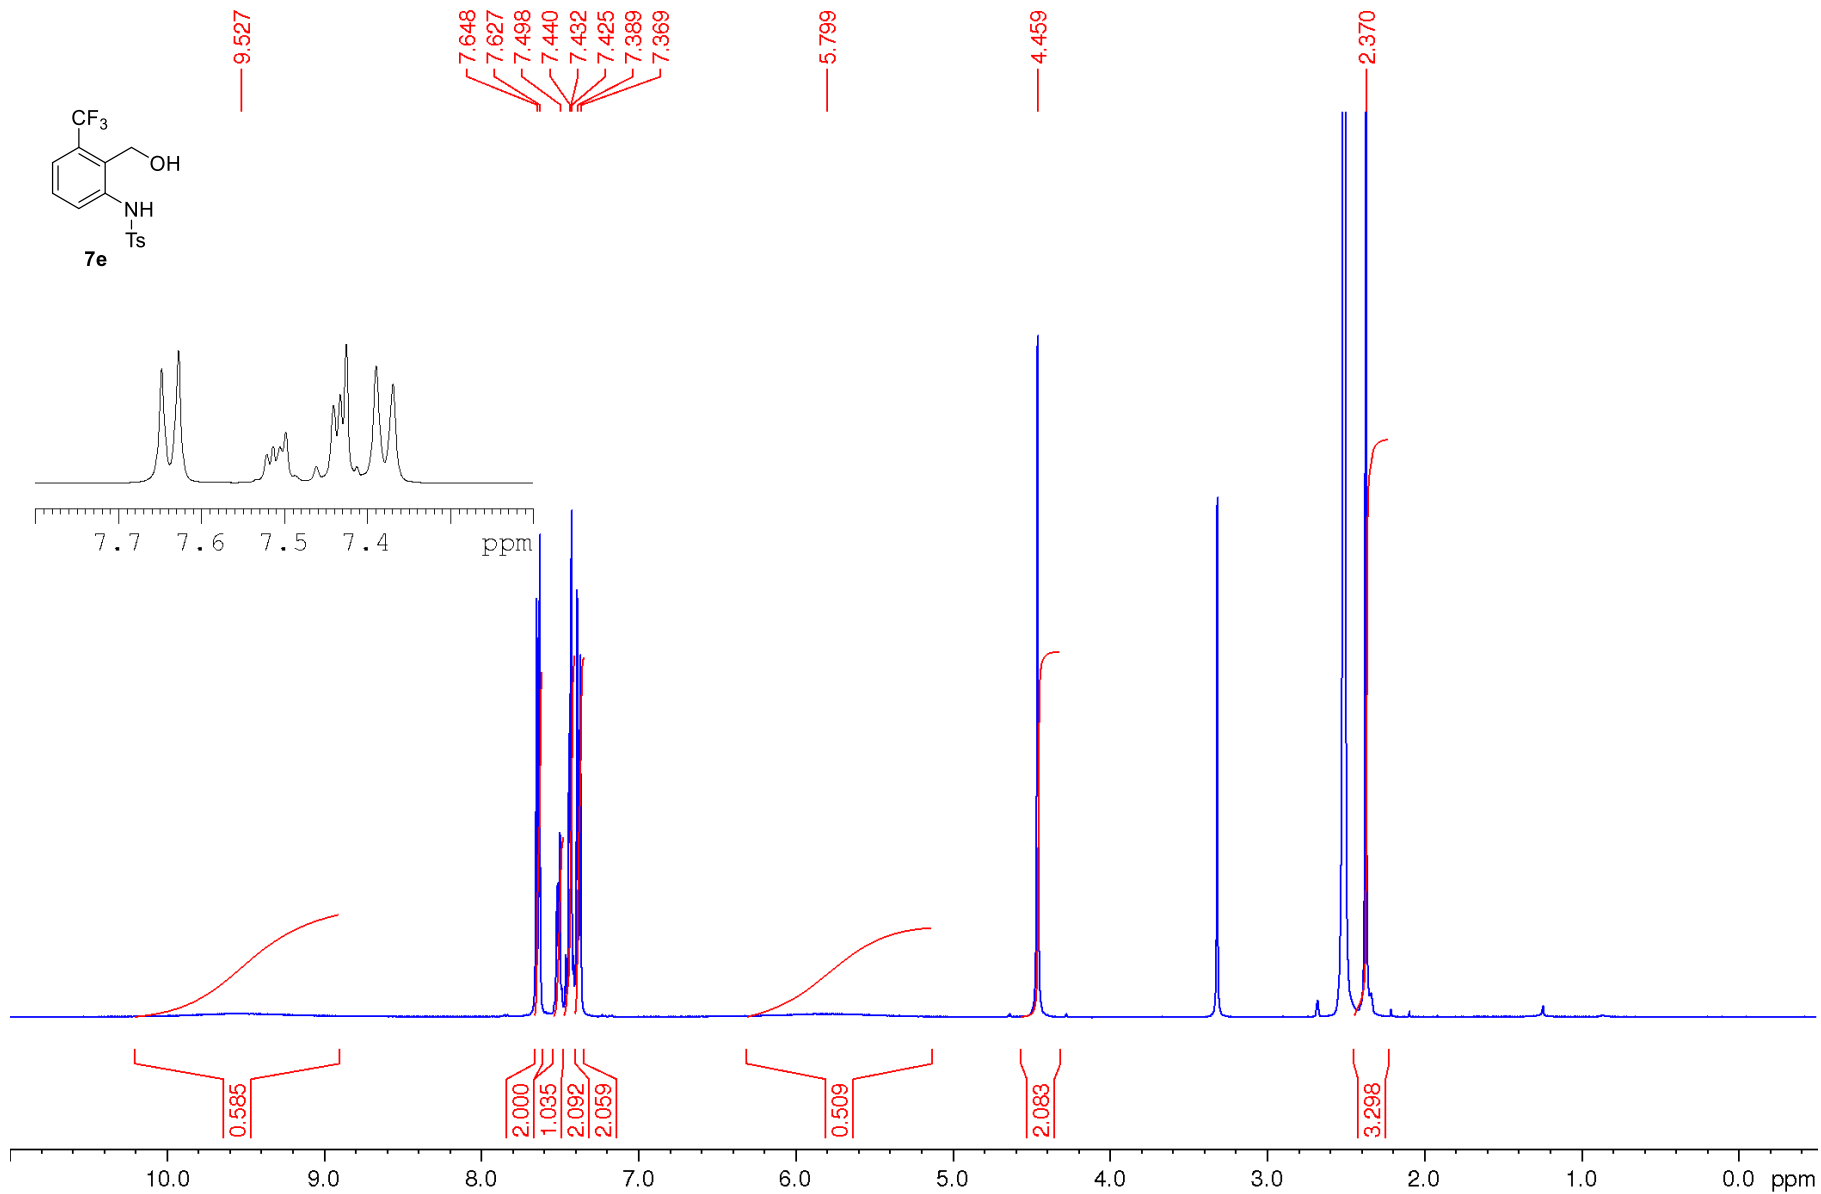

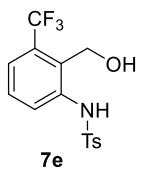

144.369  
138.953  
136.827  
129.964  
129.483  
129.174  
129.088  
128.871  
126.831  
125.190  
122.509  
122.472  
122.444  
122.386  
122.327  
119.754

58.482  
58.452

21.680

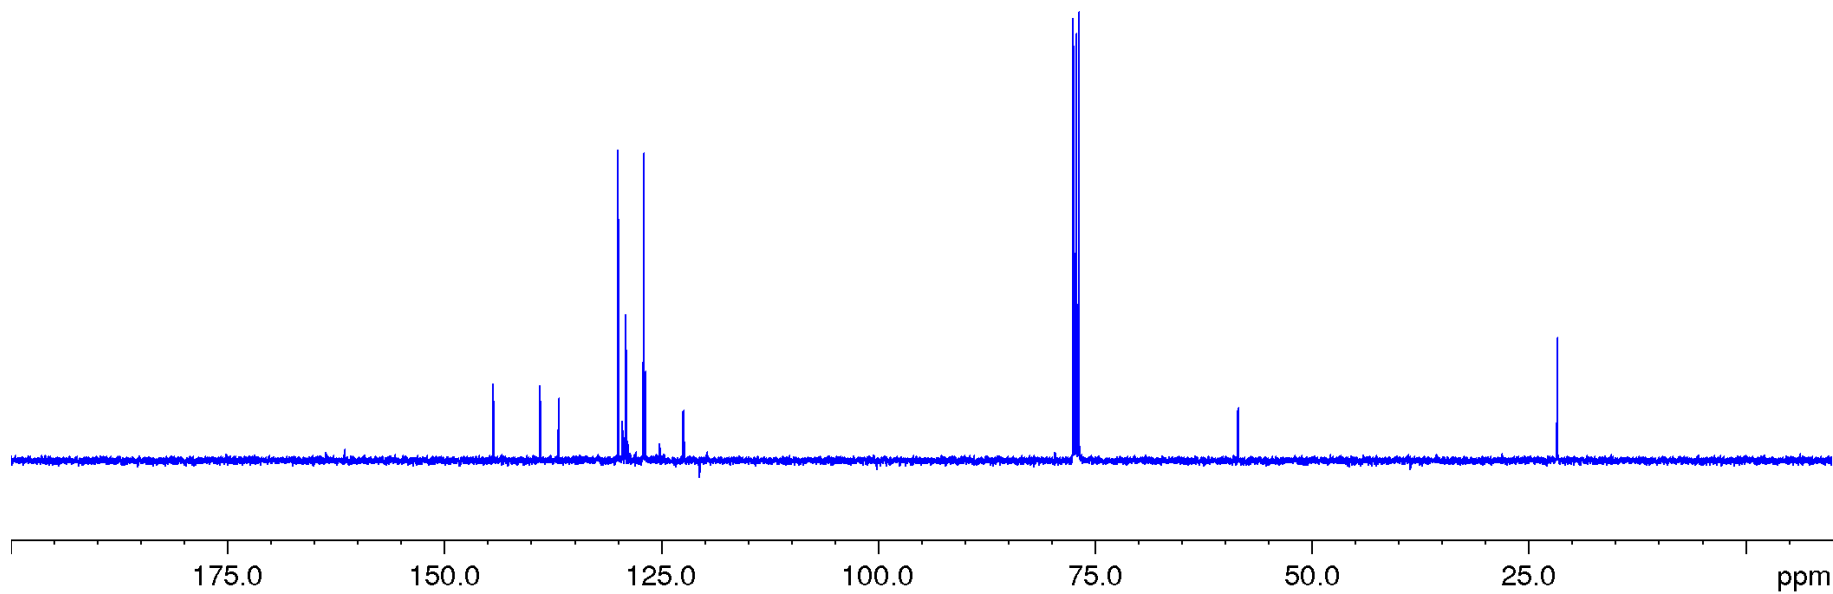

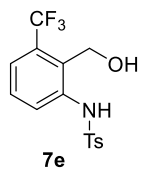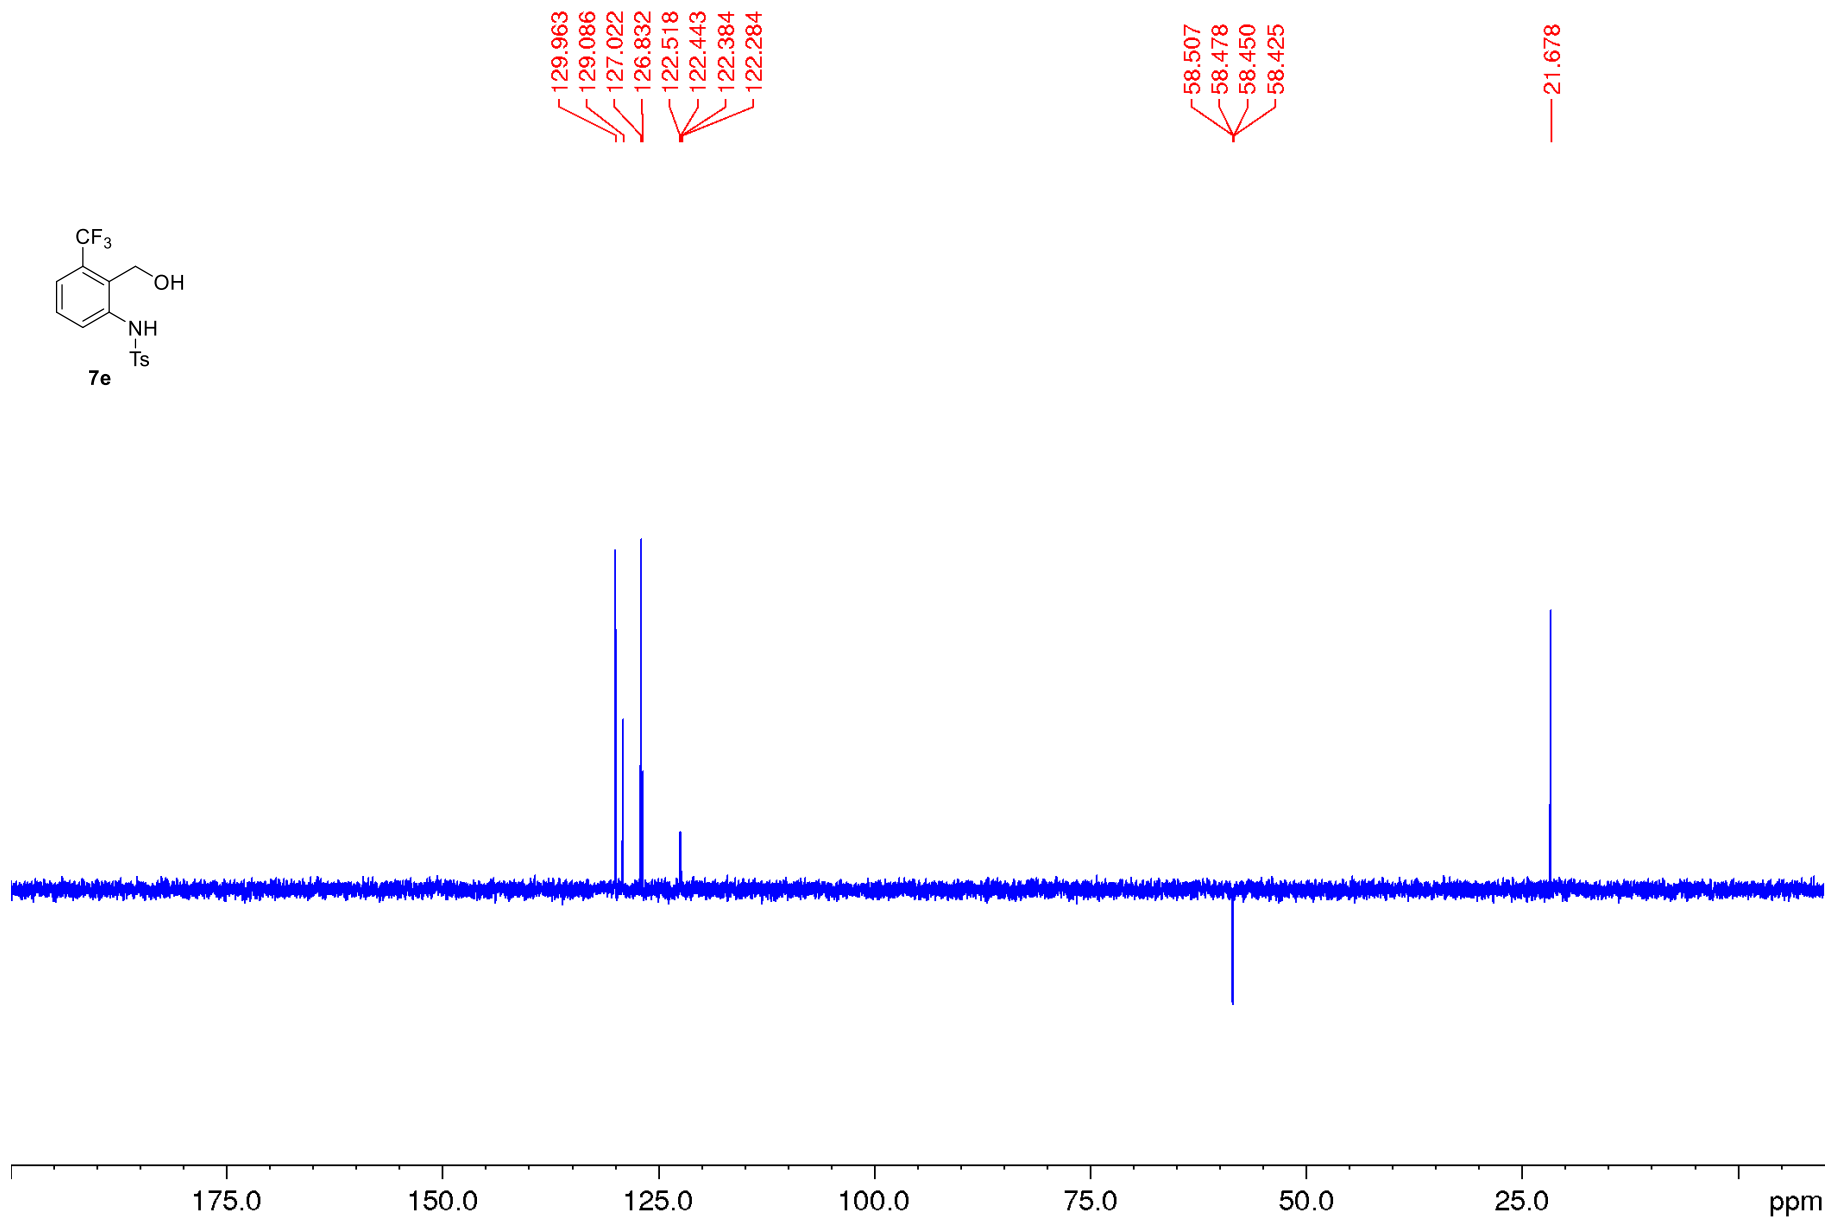

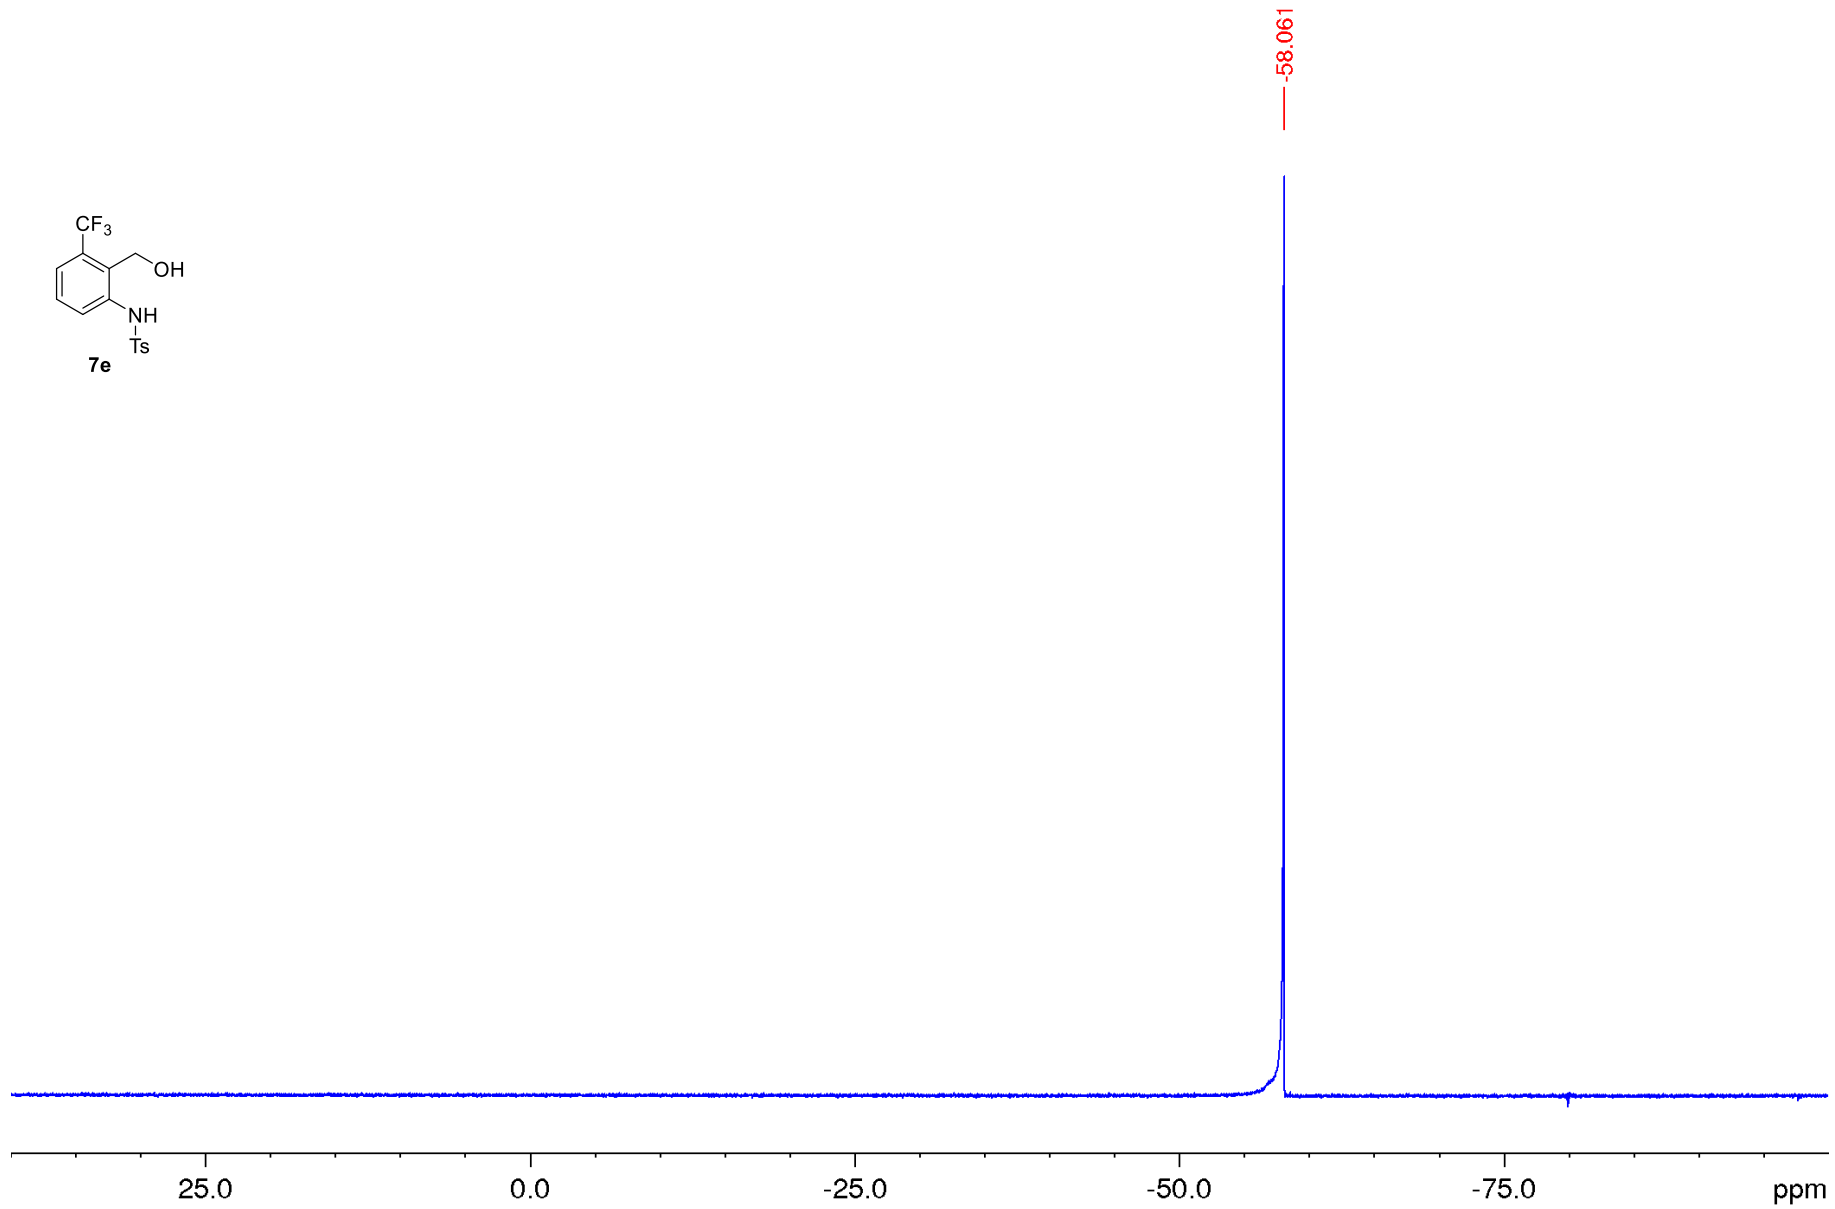

S108



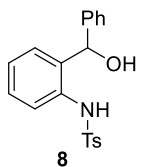

8.012  
7.382  
7.373  
7.362  
7.353  
7.225  
7.216  
7.209  
7.180  
7.142  
7.123  
7.103  
7.081  
7.072  
7.058  
7.037  
6.947  
6.929  
6.910  
6.835  
6.817  
5.588

2.674  
2.289

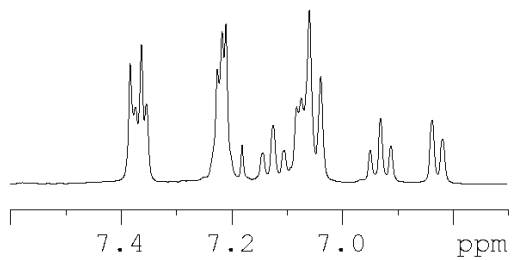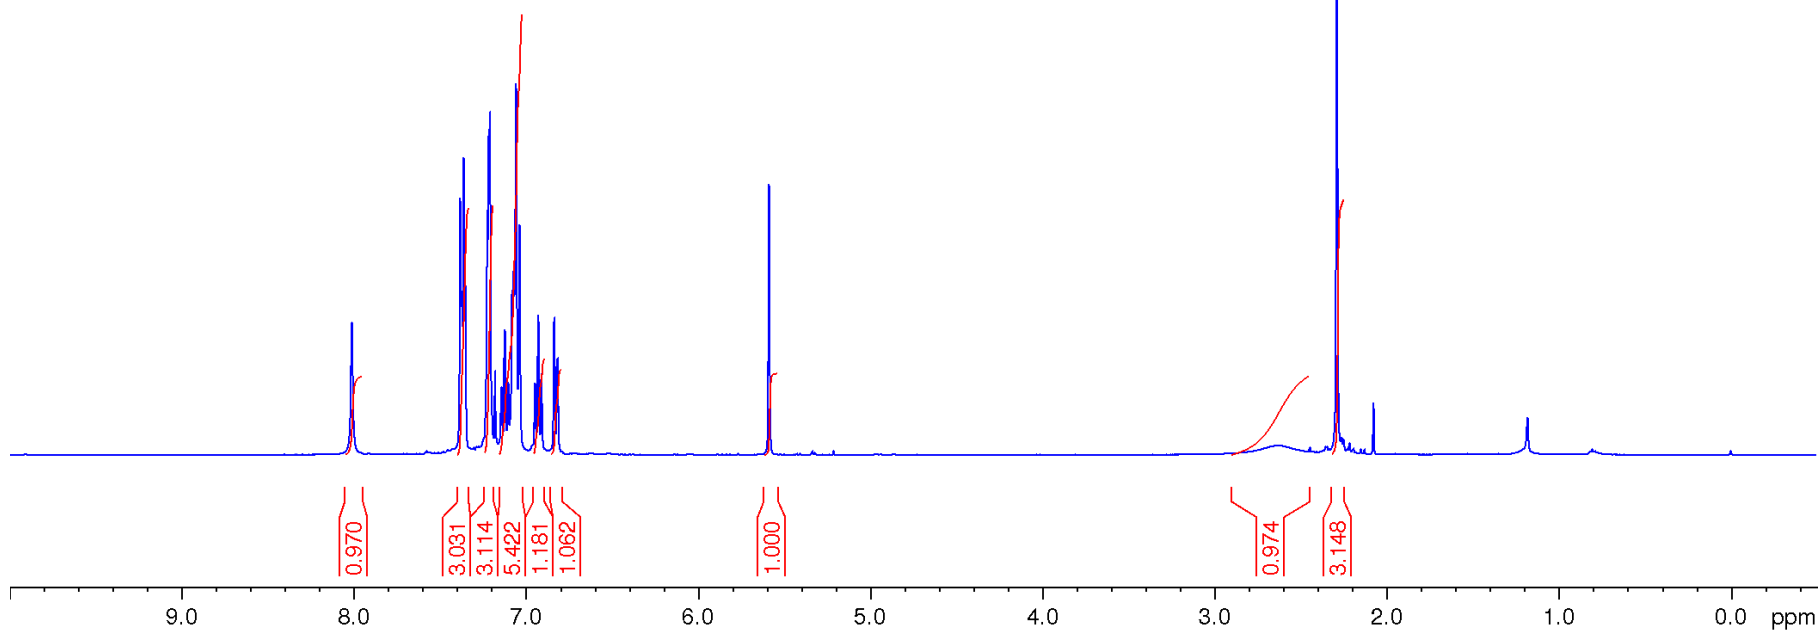

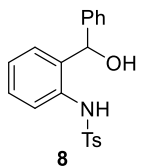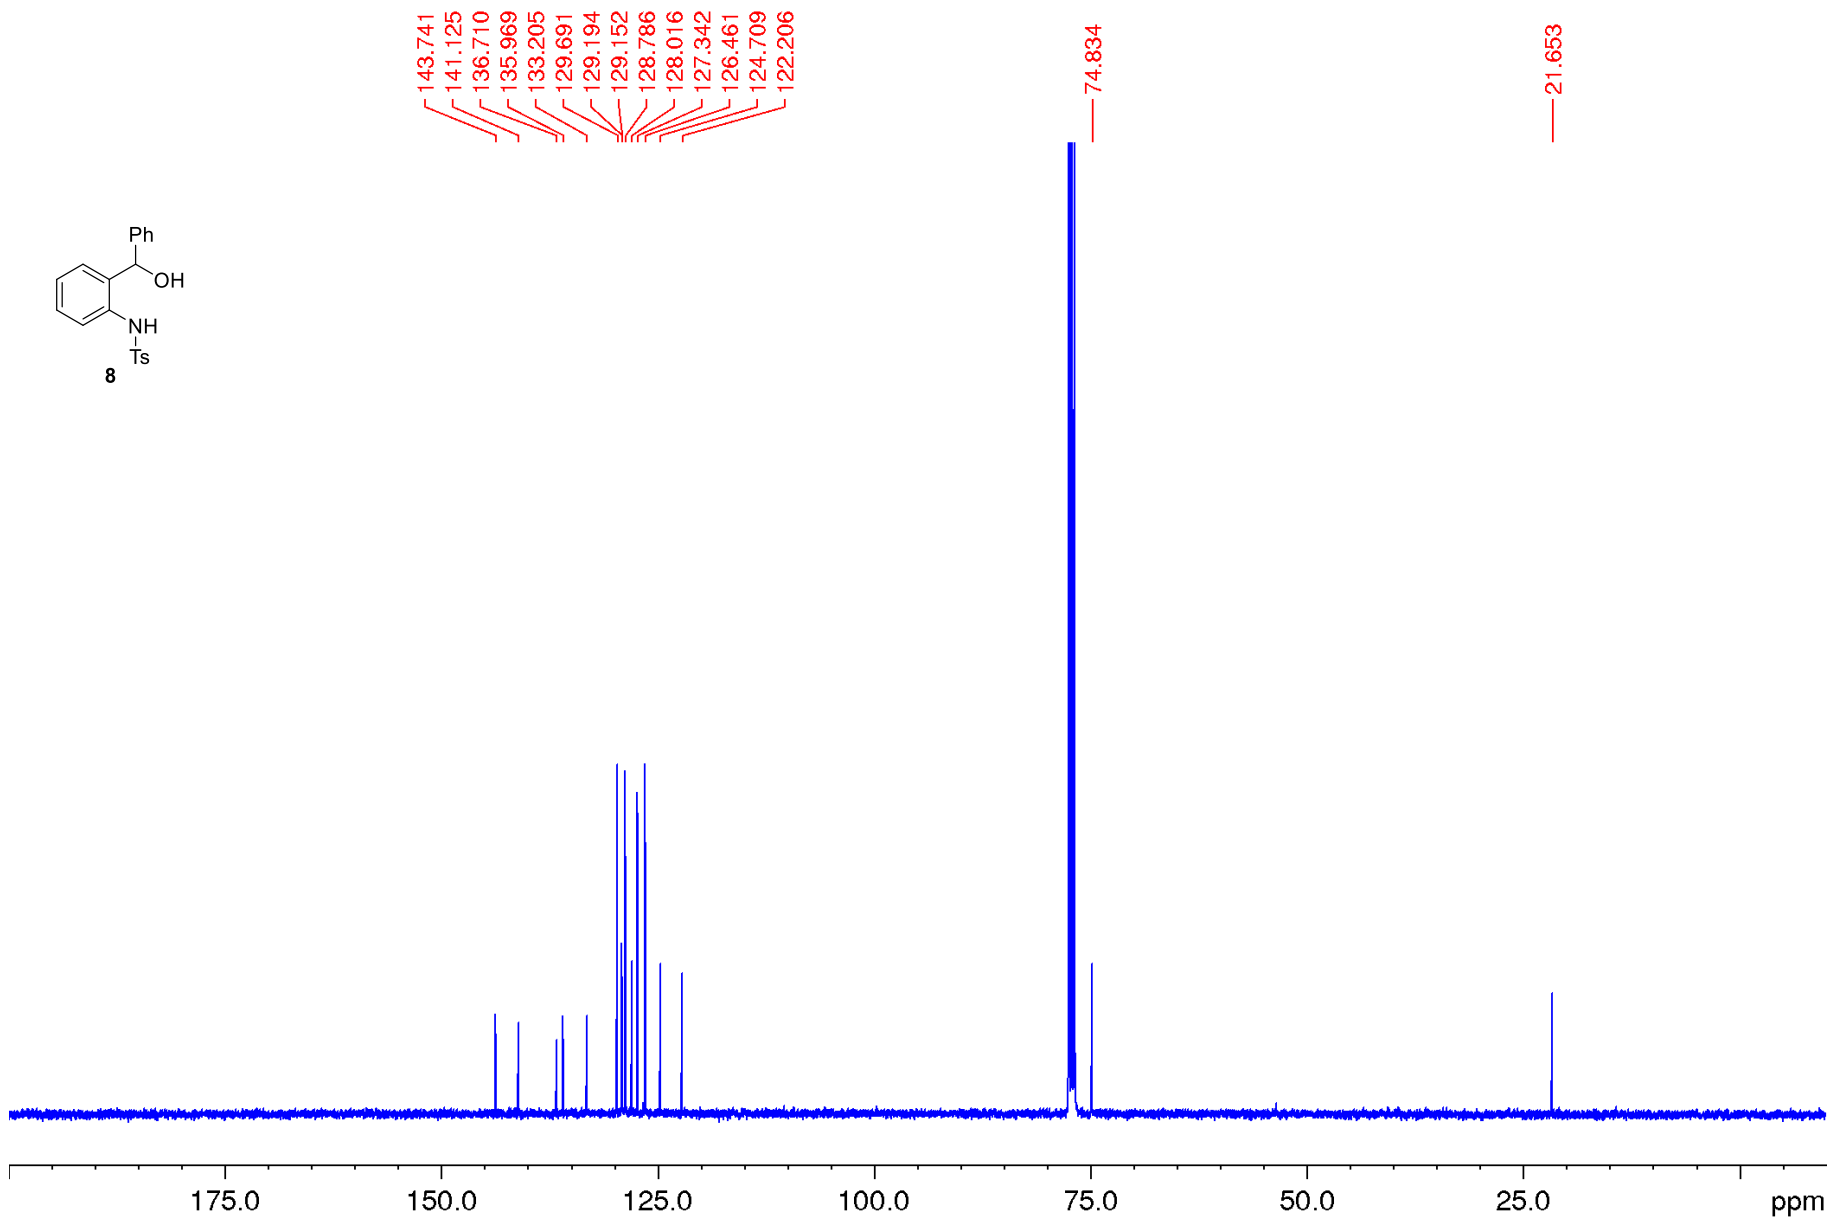

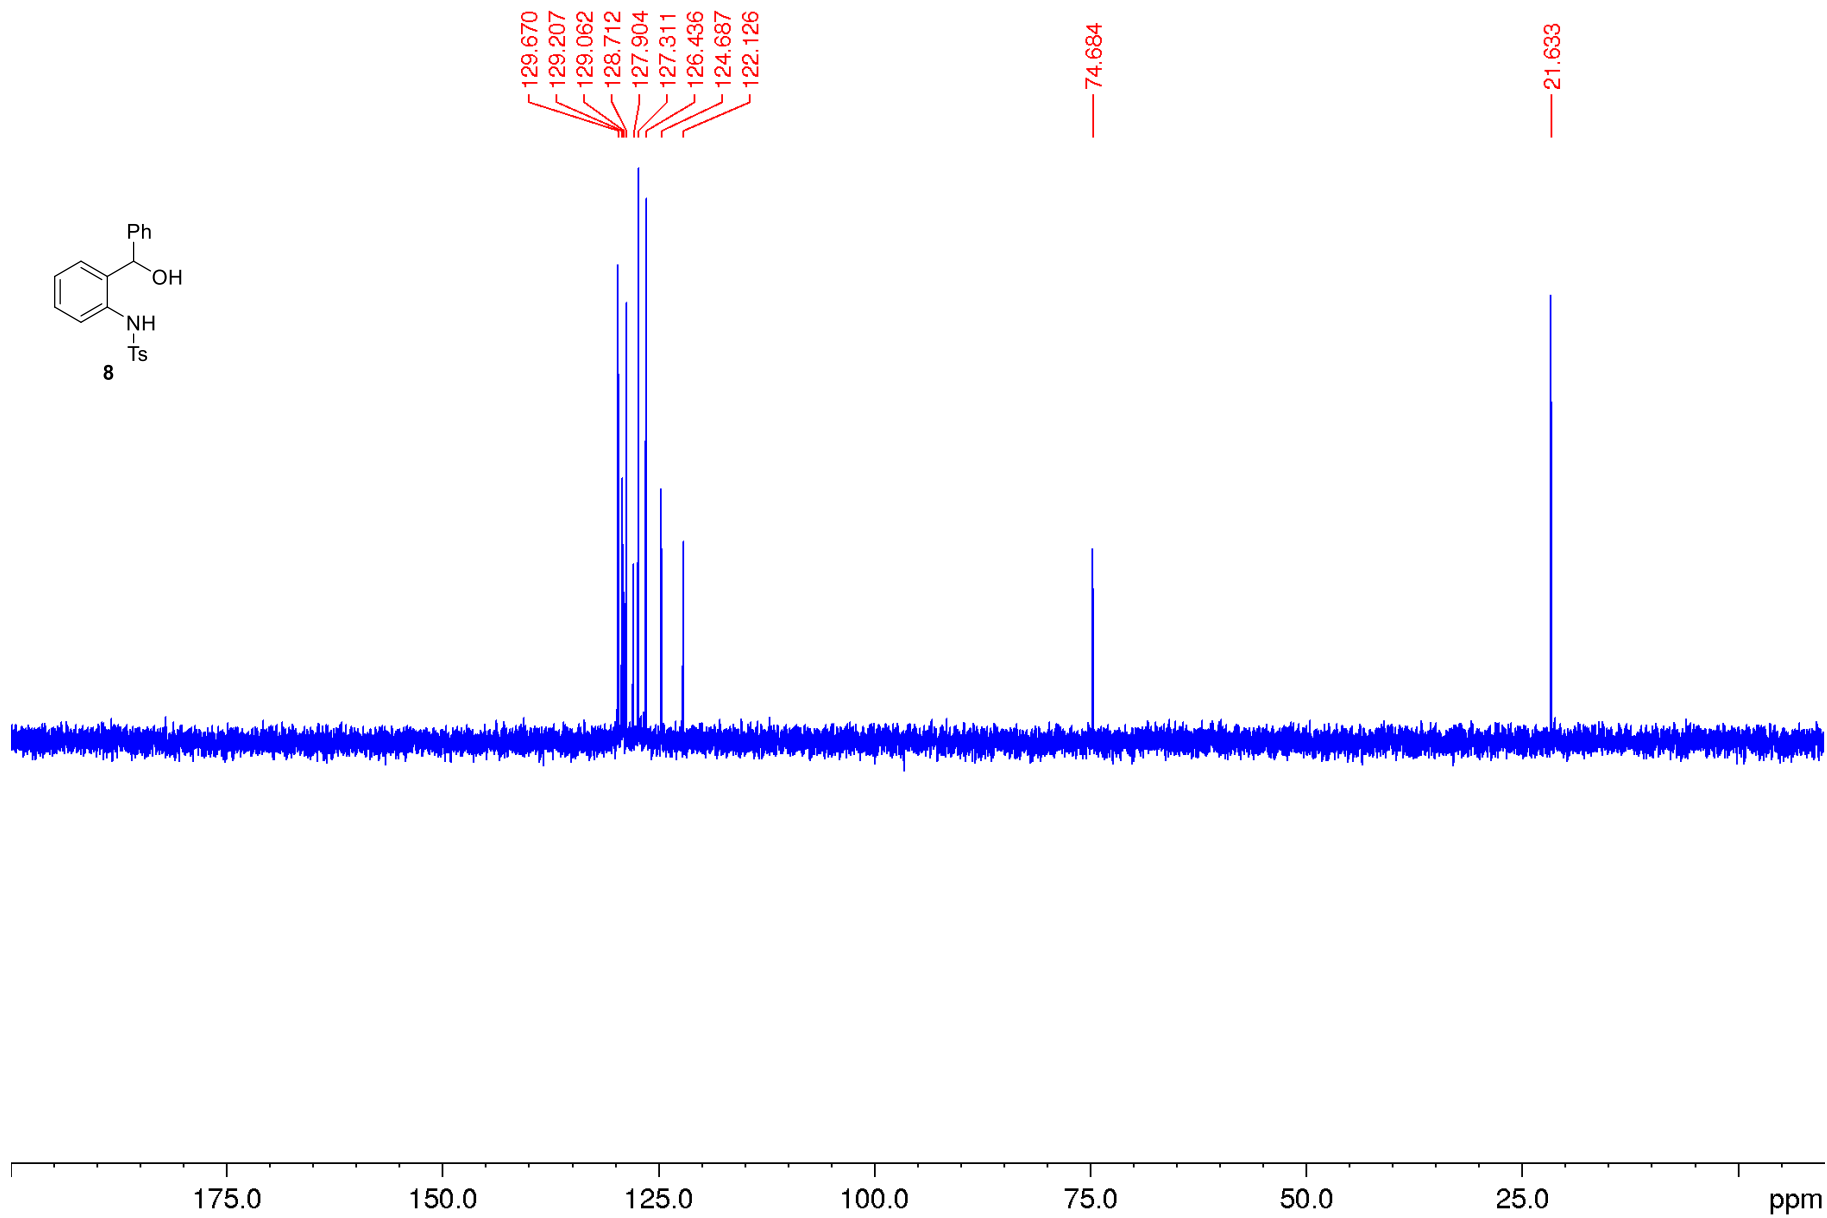

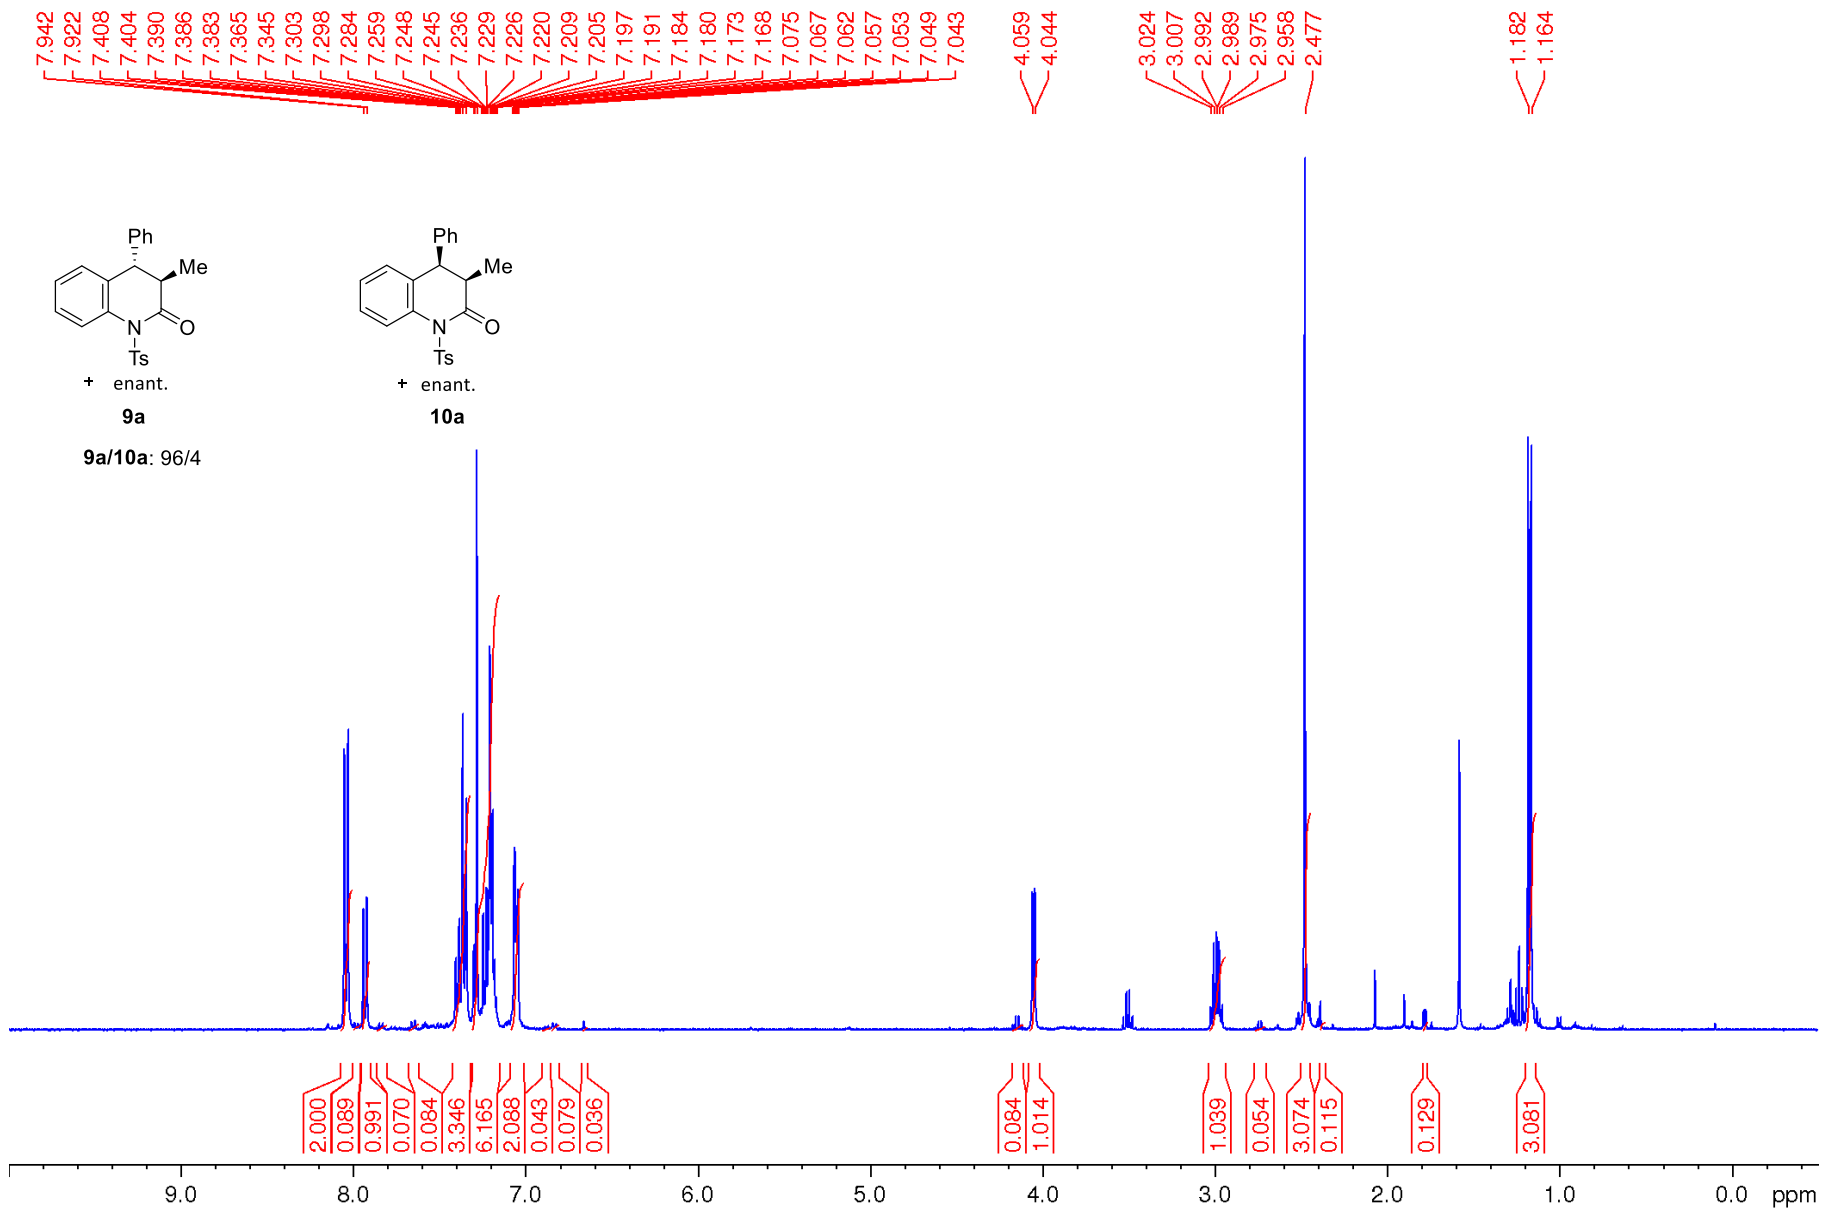

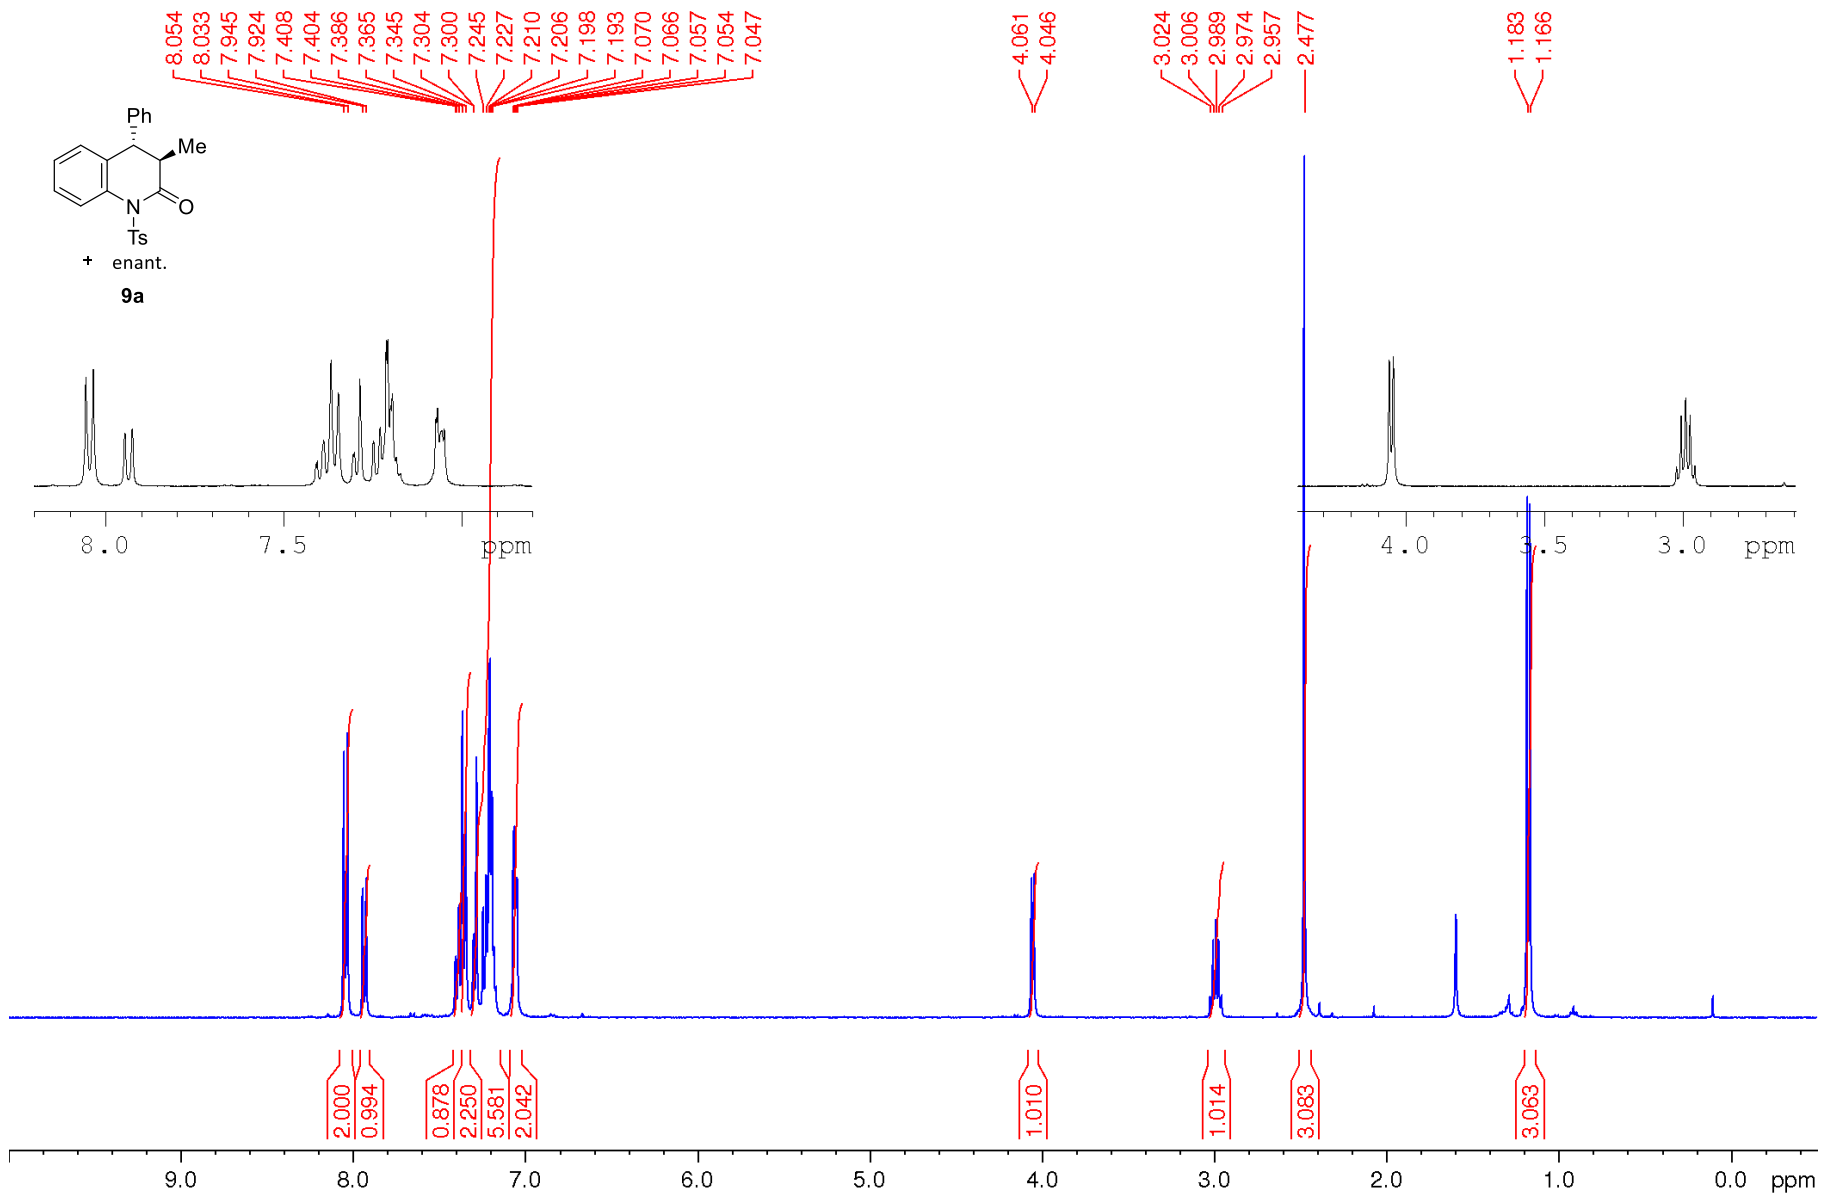

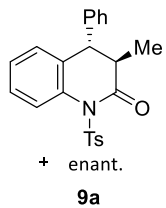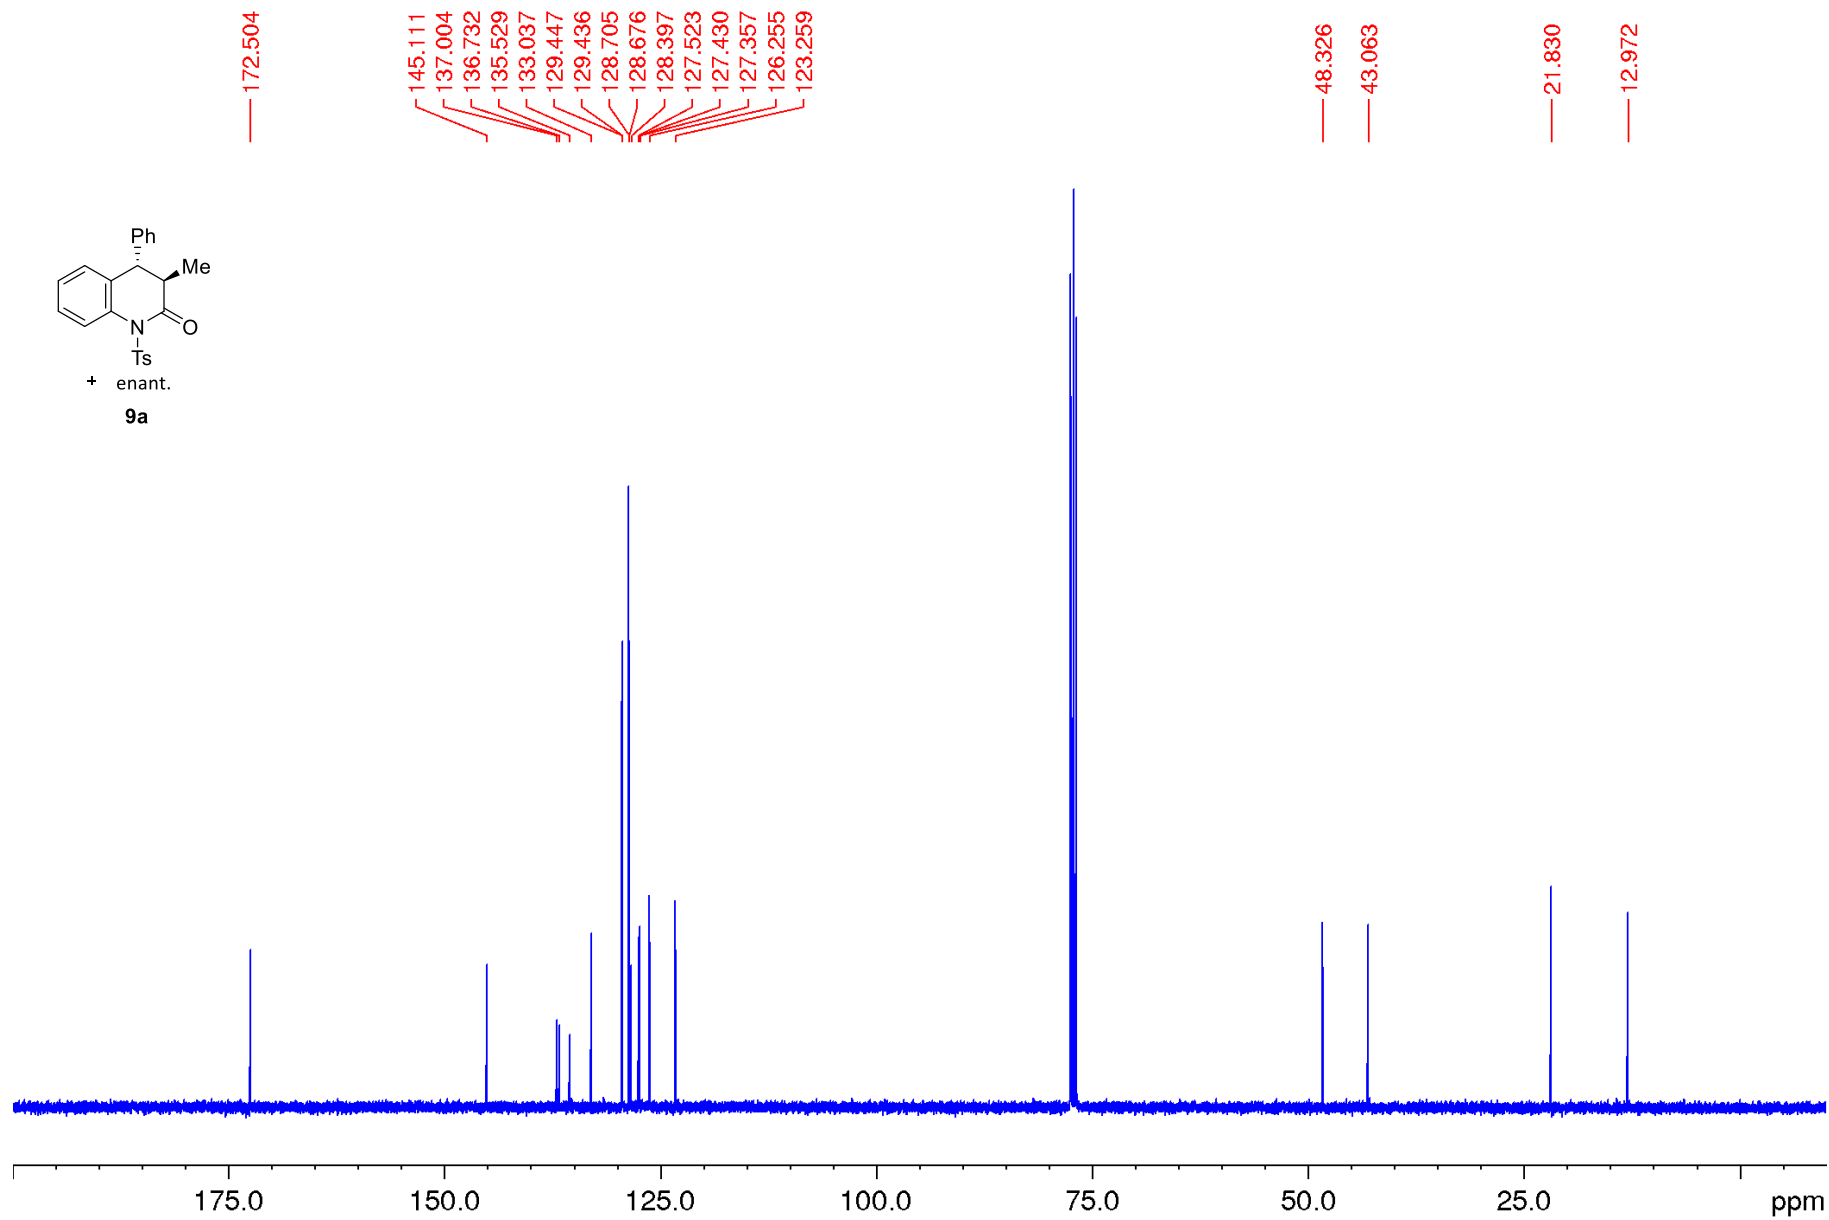



129.447  
128.710  
128.677  
128.396  
127.530  
127.441  
126.260  
123.267

48.324  
43.067

21.842  
12.981

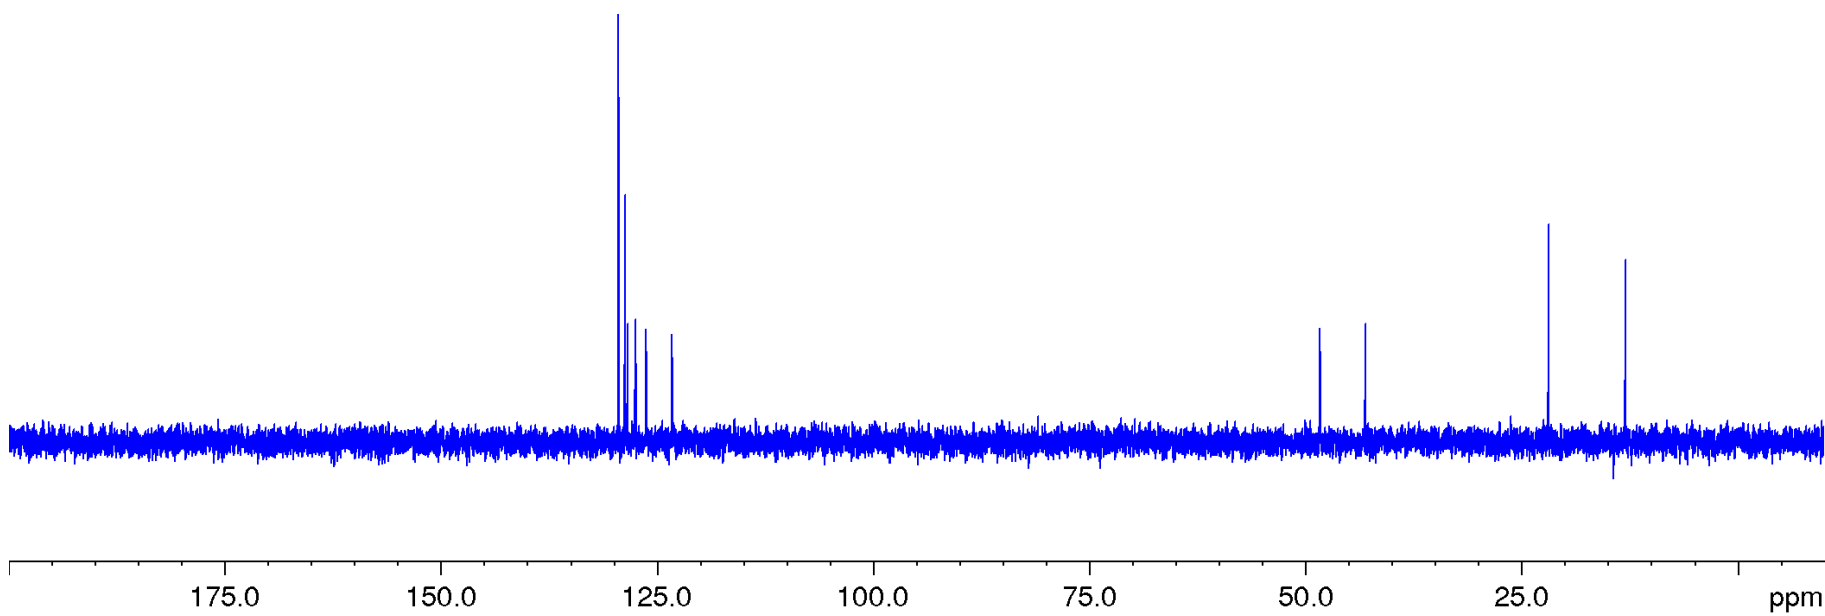

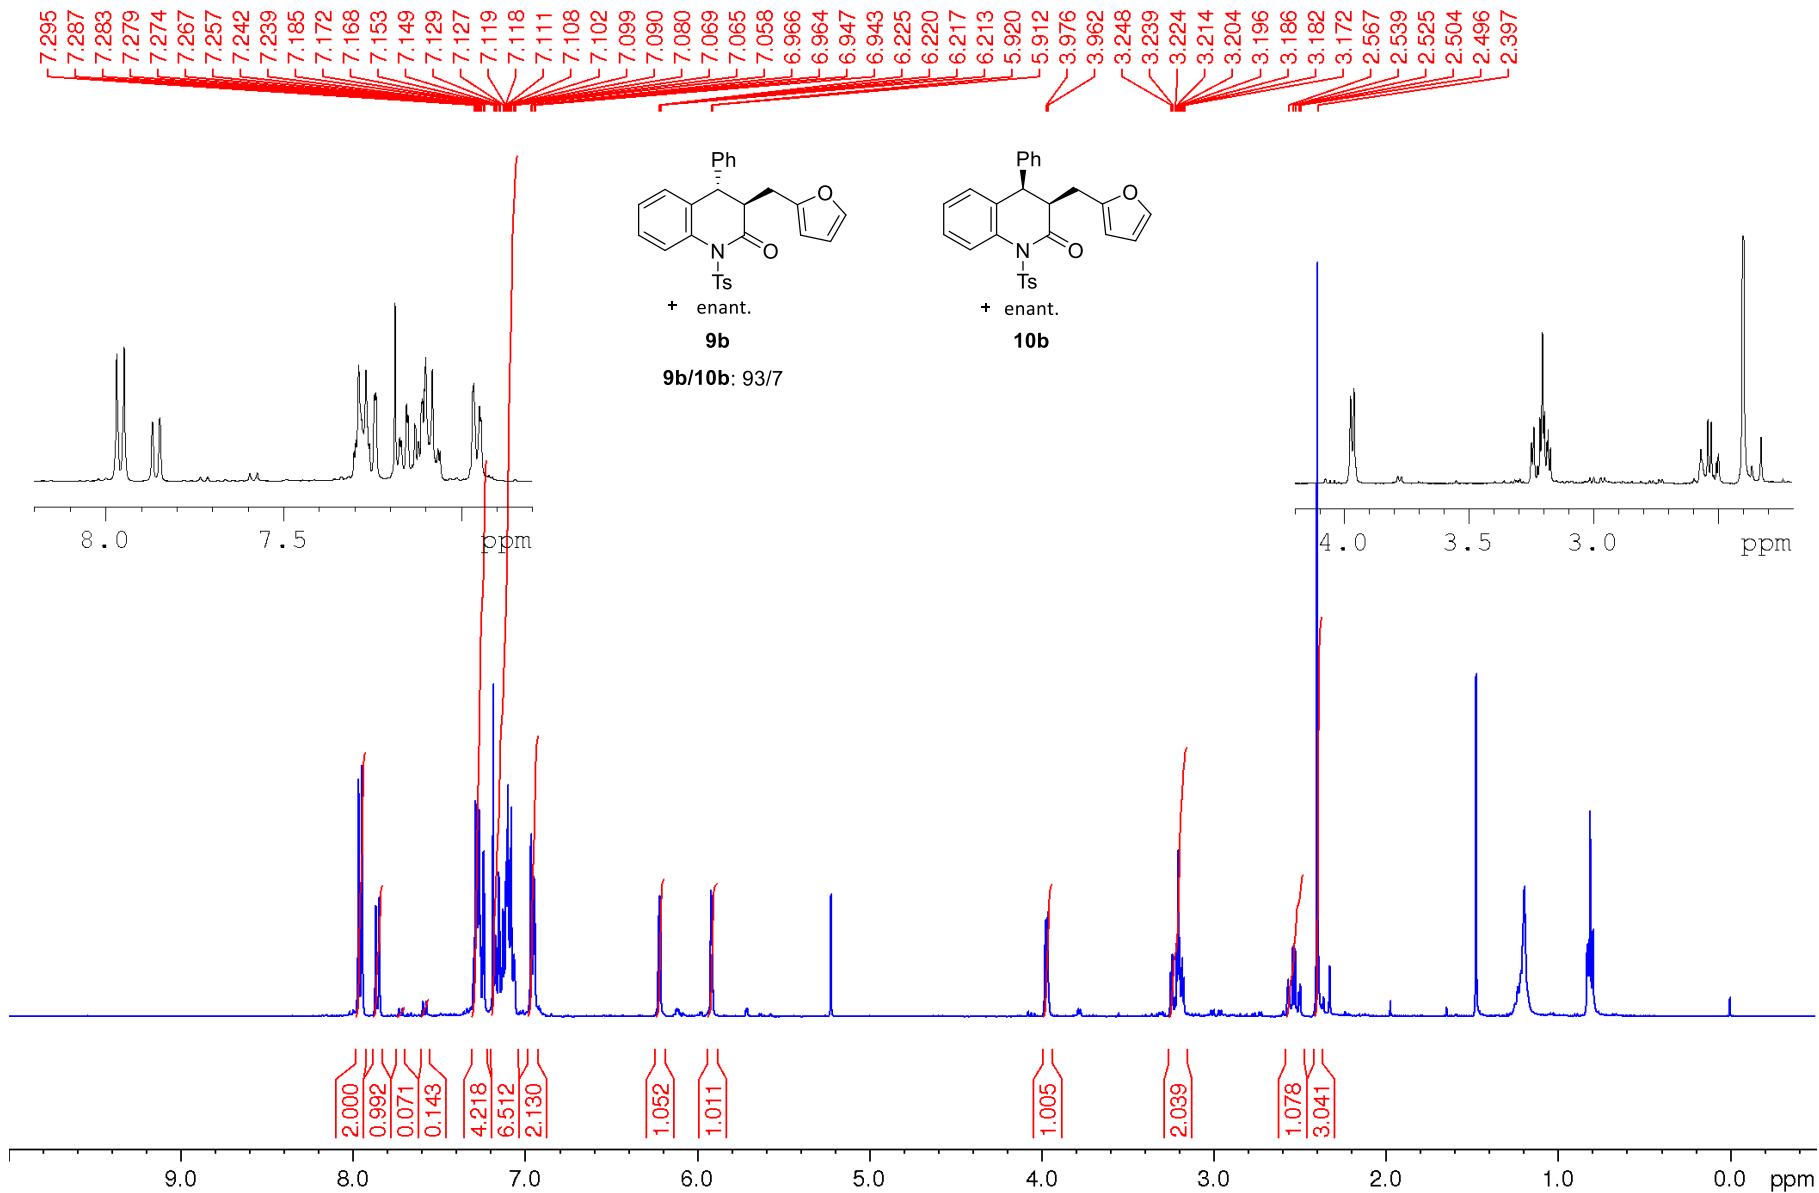



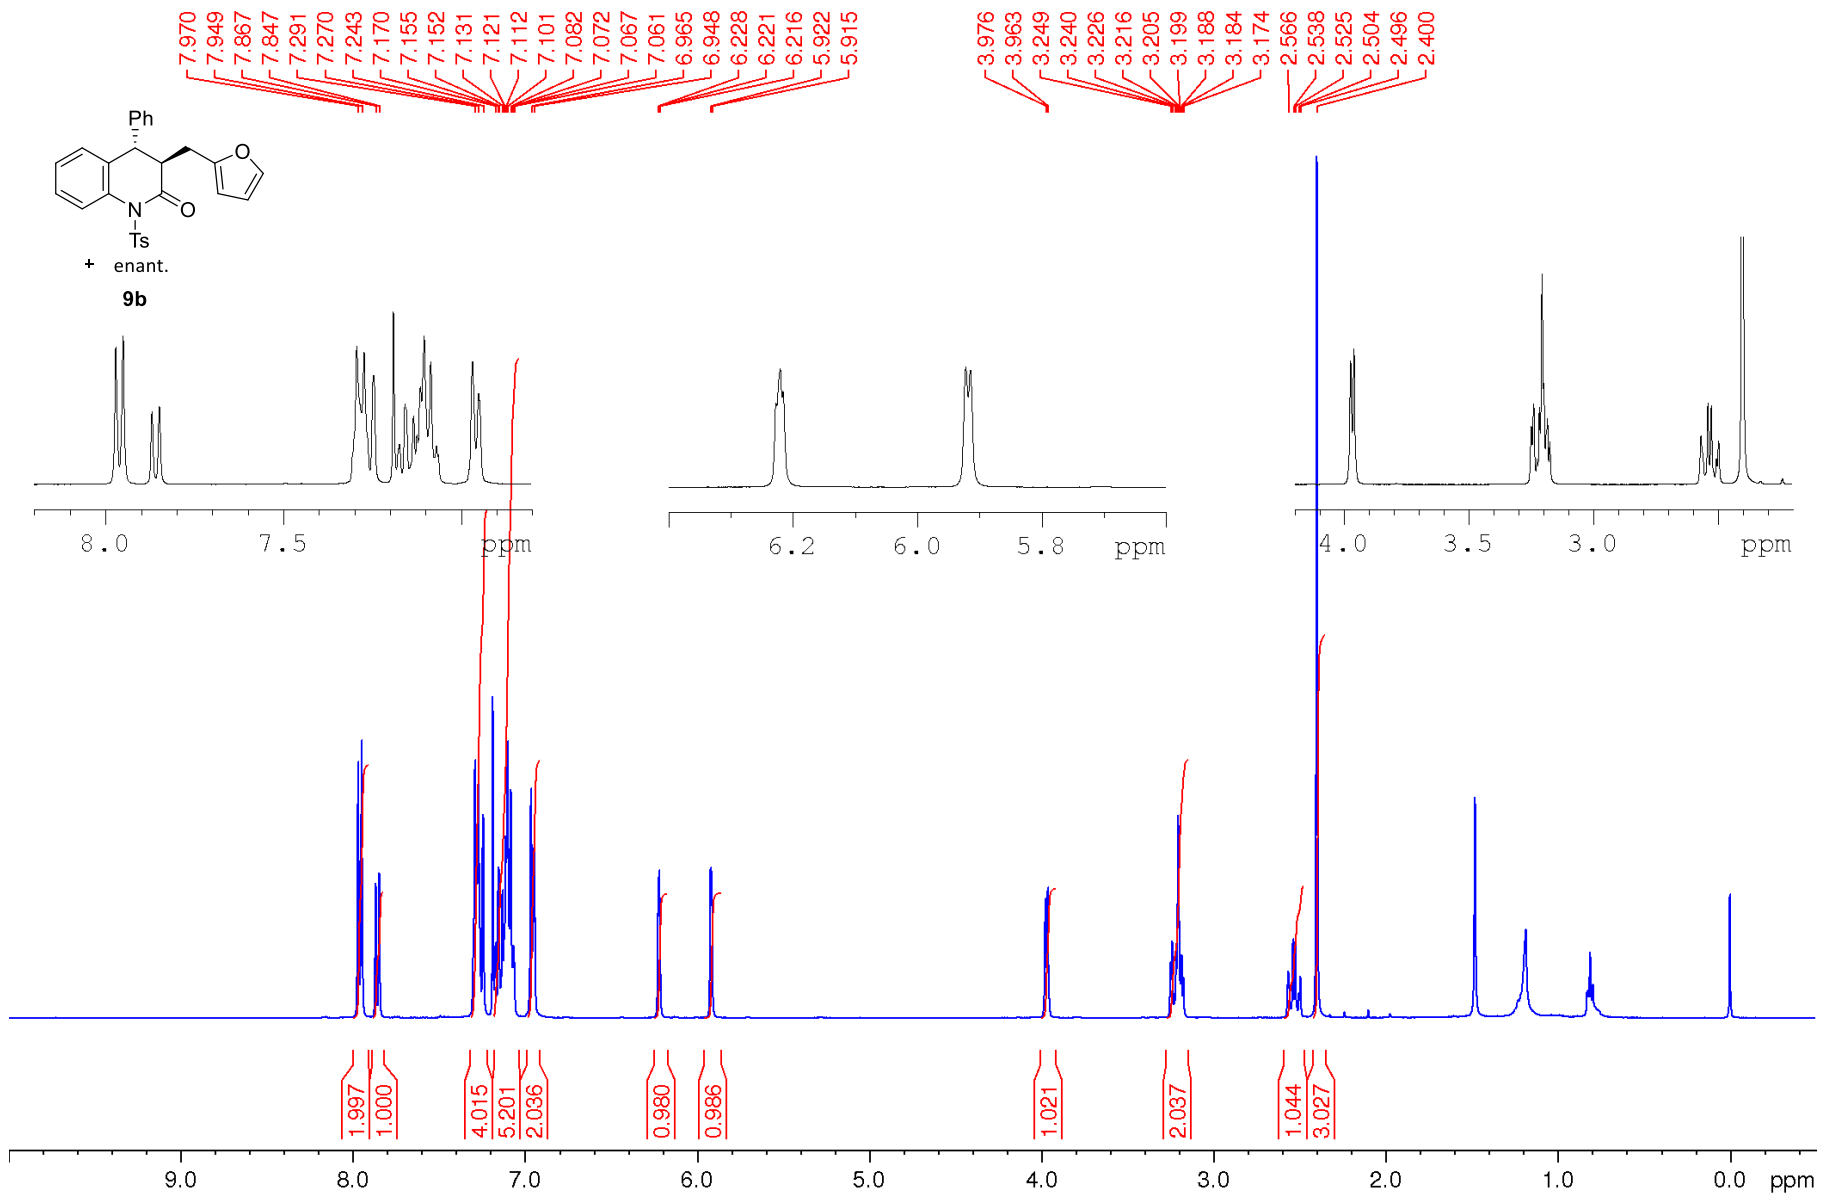

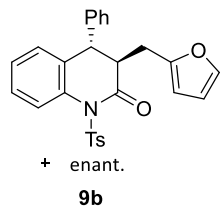

171.231  
152.820  
145.388  
141.778  
136.981  
136.605  
135.420  
133.074  
129.660  
129.608  
128.954  
128.757  
128.735  
127.713  
127.648  
126.446  
123.368  
110.552  
107.359

47.268  
45.488

25.343  
21.984

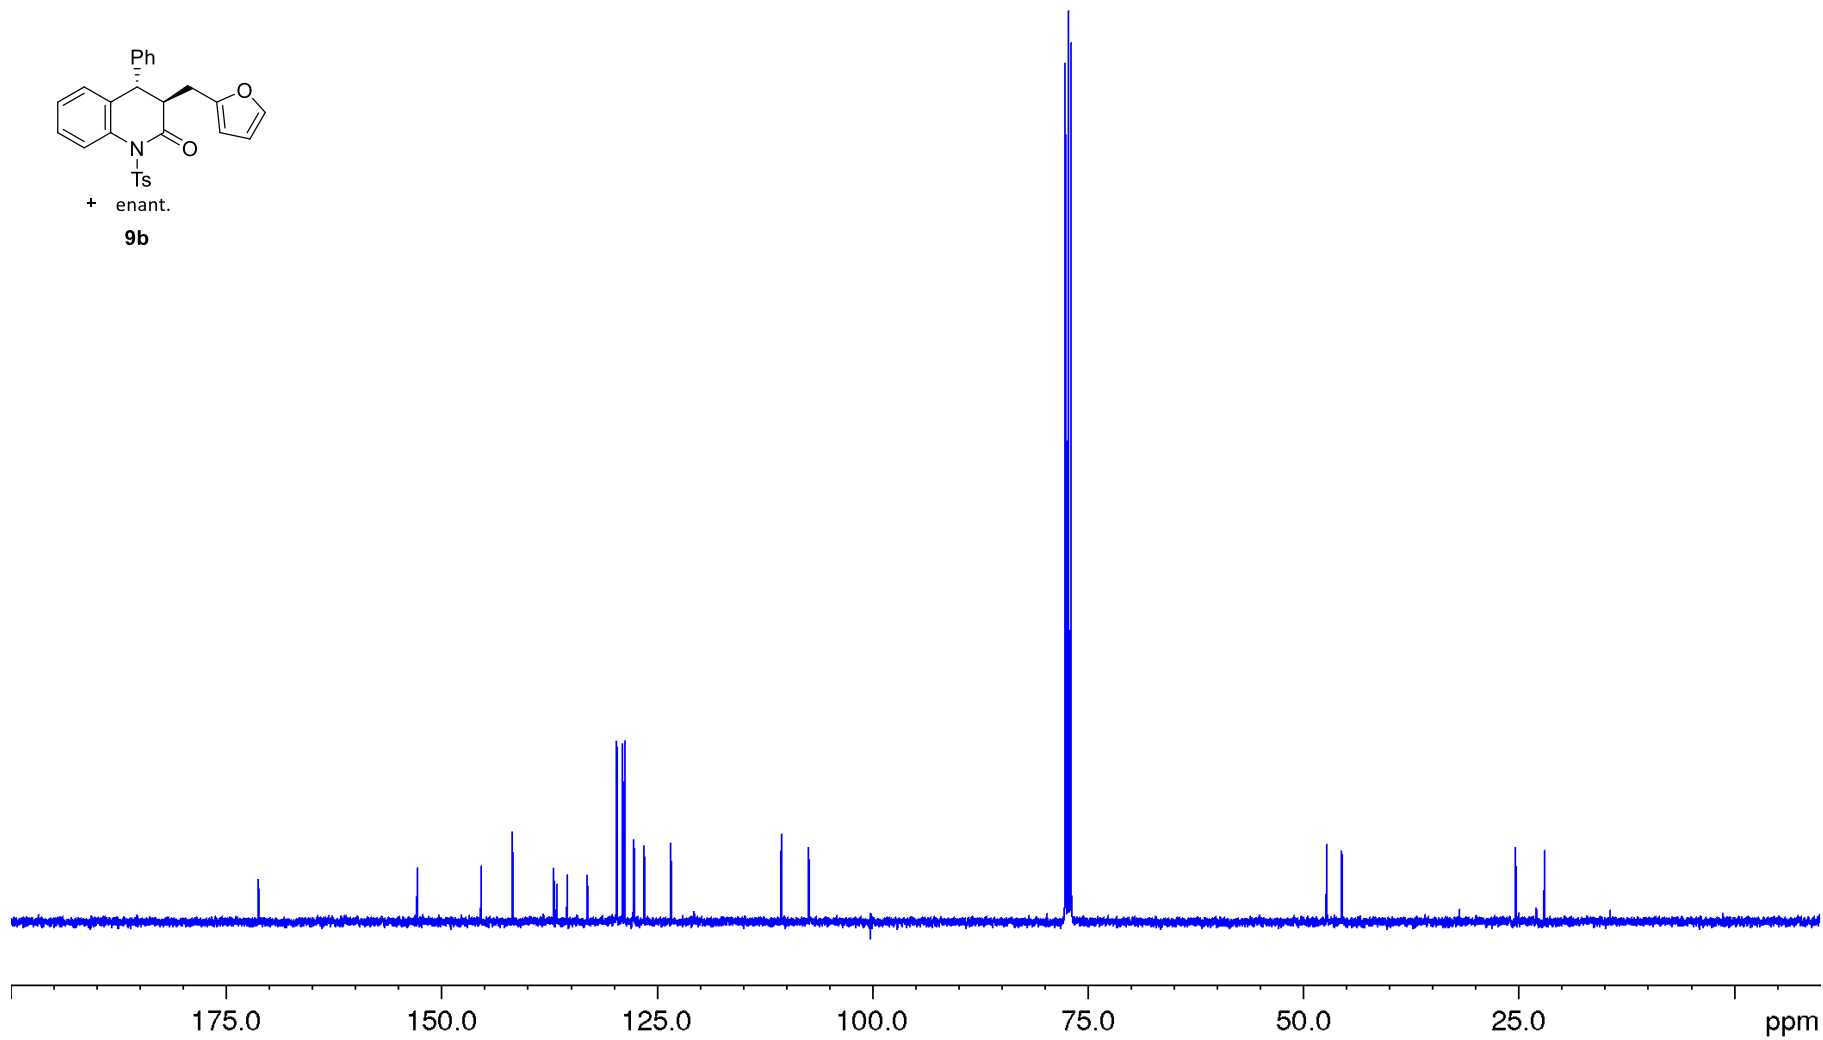

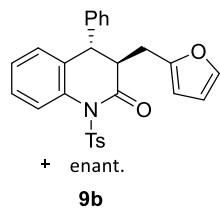

141.779  
129.661  
129.608  
128.955  
128.758  
128.737  
127.714  
127.648  
126.447  
123.369  
110.553  
107.360

47.269  
45.489

25.346  
21.986

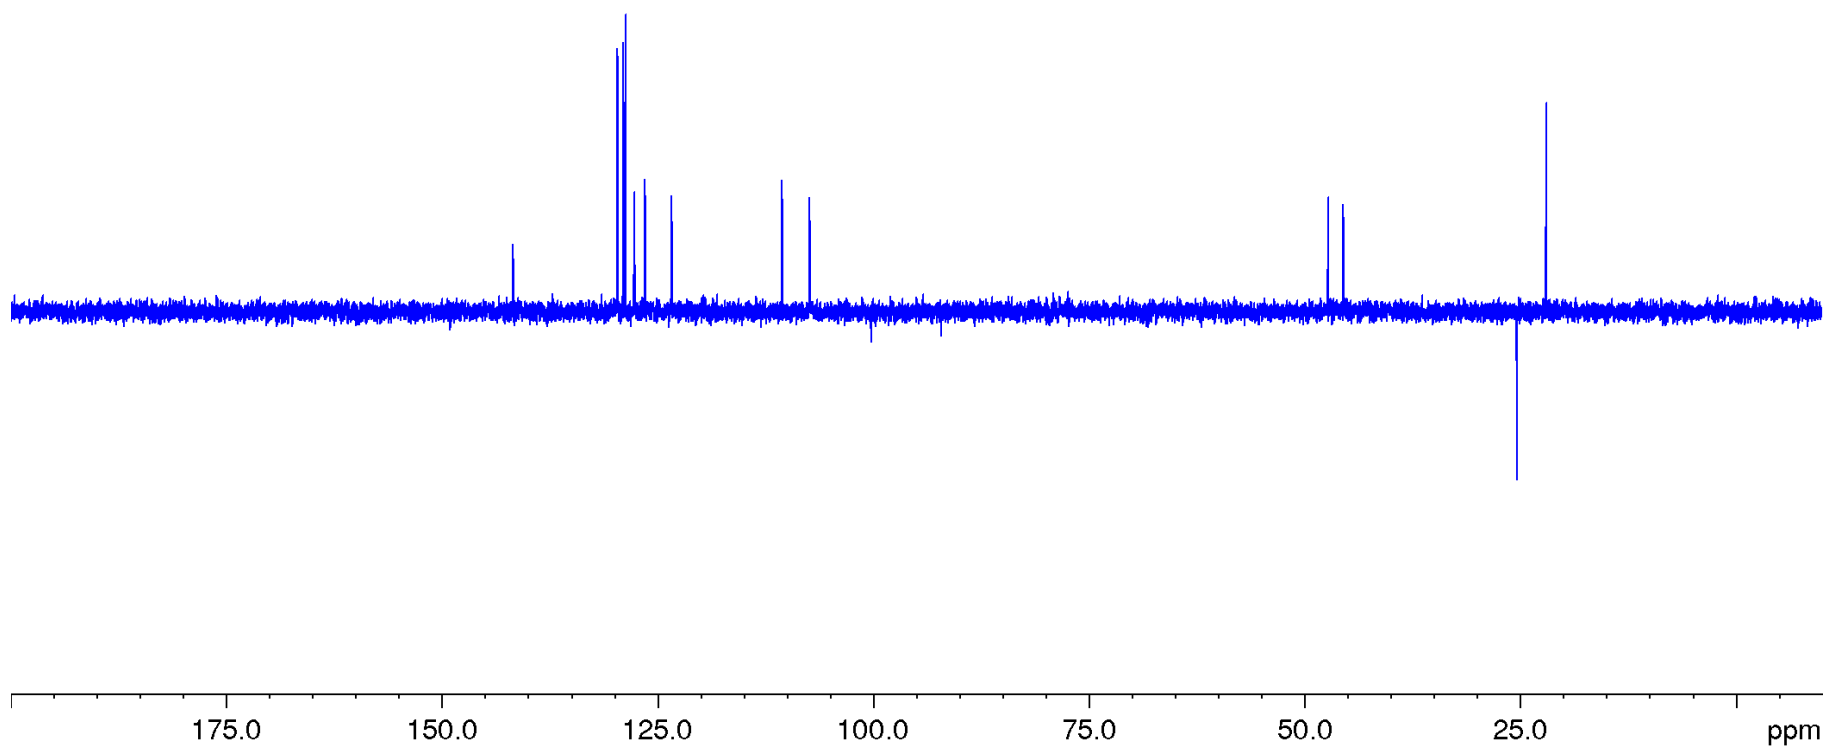

7.936  
7.915  
7.819  
7.798  
7.763  
7.743  
7.681  
7.661  
7.515  
7.495  
7.445  
7.425  
7.349  
7.289  
7.248  
7.236  
7.232  
7.214  
7.197  
7.192  
7.171  
7.152  
7.124  
7.105  
7.101  
7.084  
7.070  
7.063  
7.051  
7.043  
7.034  
7.012  
6.993  
6.888  
6.870  
6.850  
6.829  
6.776  
6.755  
6.707  
3.806  
3.792  
3.779  
3.687  
3.678  
3.262  
3.252  
3.226  
3.215  
3.056  
3.043  
3.031  
3.018  
3.006  
2.605  
2.434  
2.415  
2.408  
2.397  
2.382  
2.352  
2.346  
2.326  
2.306  
2.281

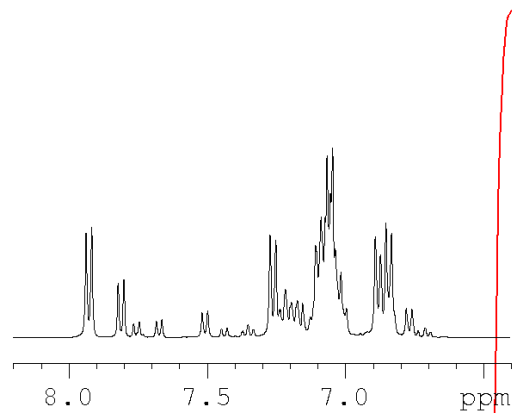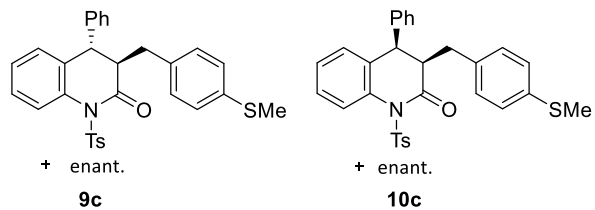

**9c/10c: 82/18**

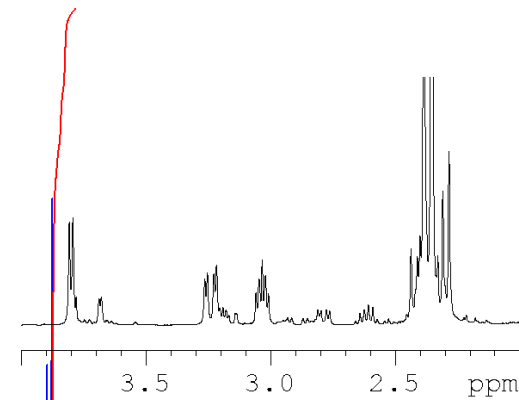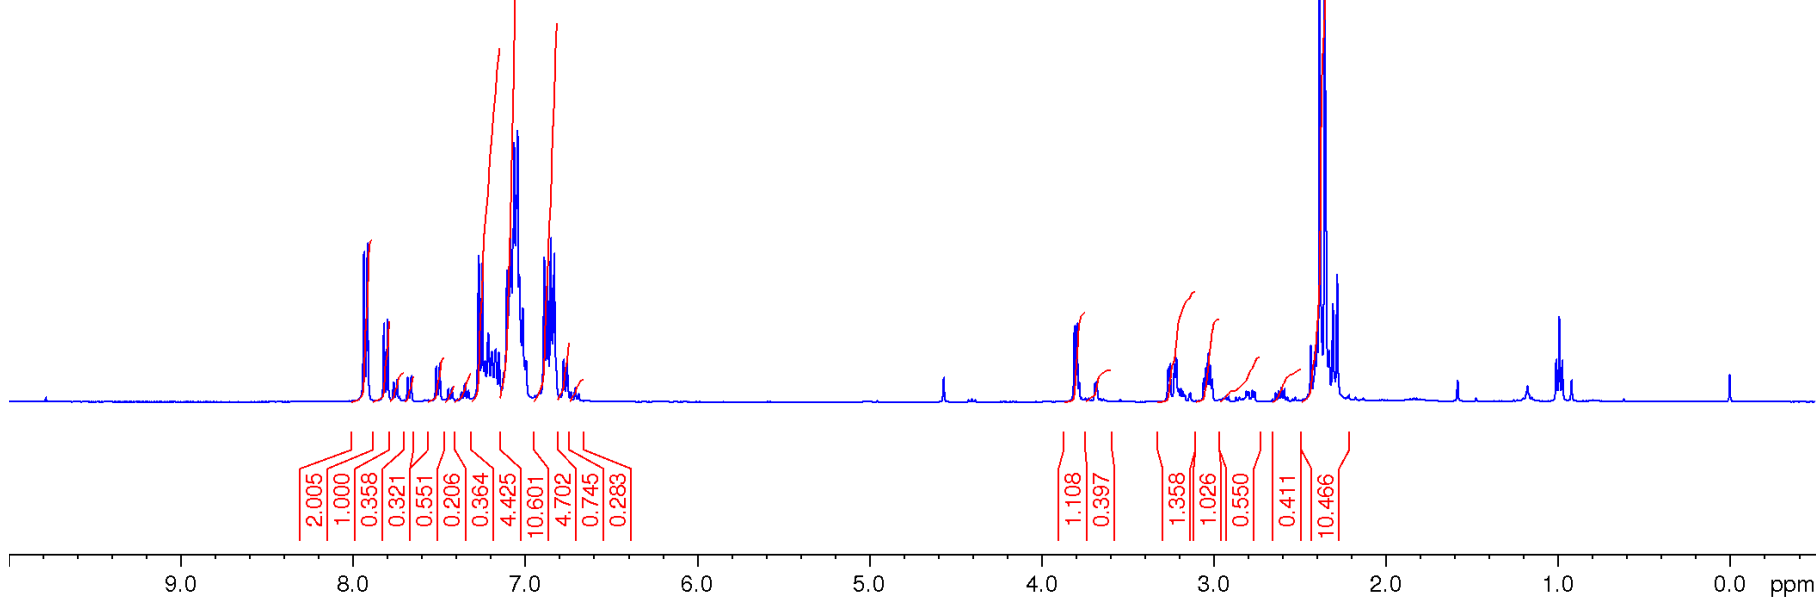

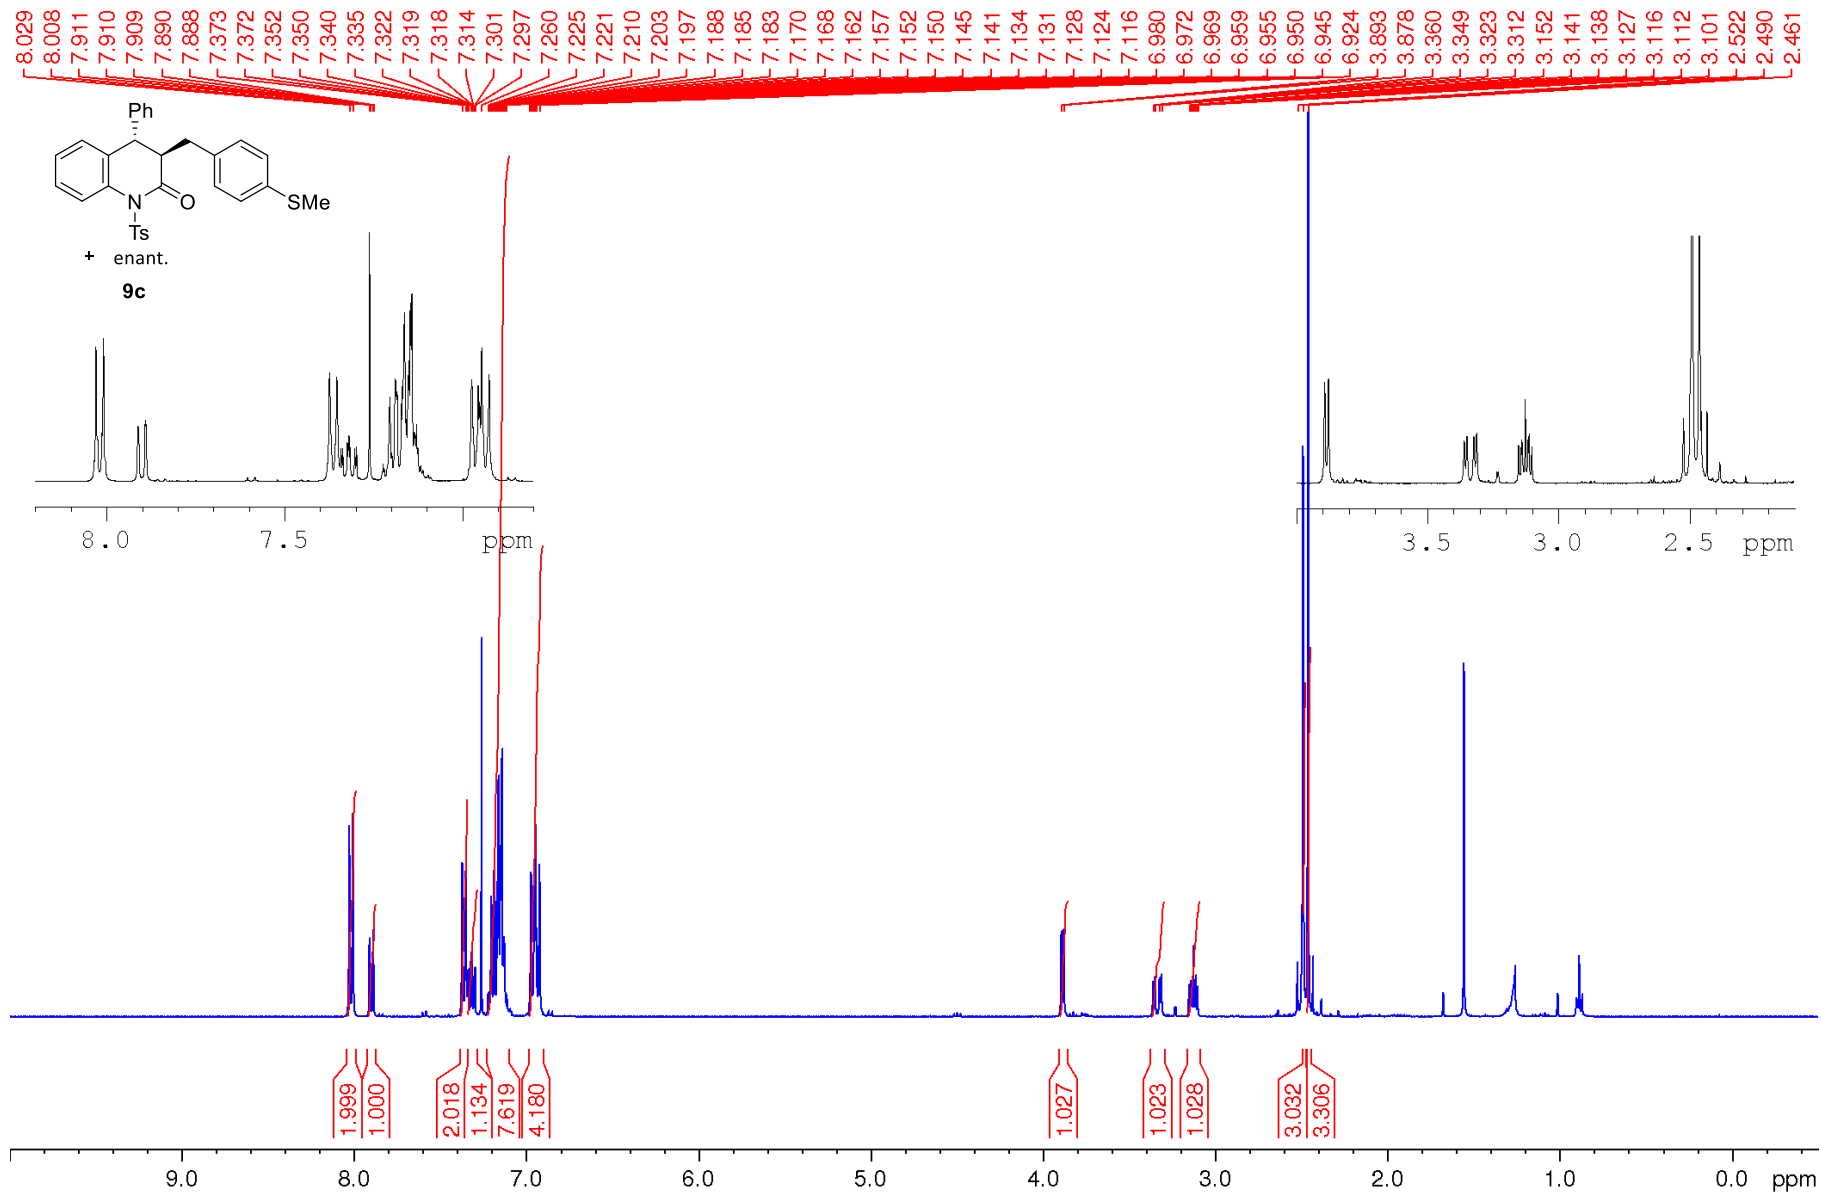

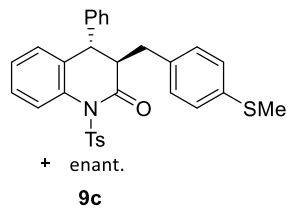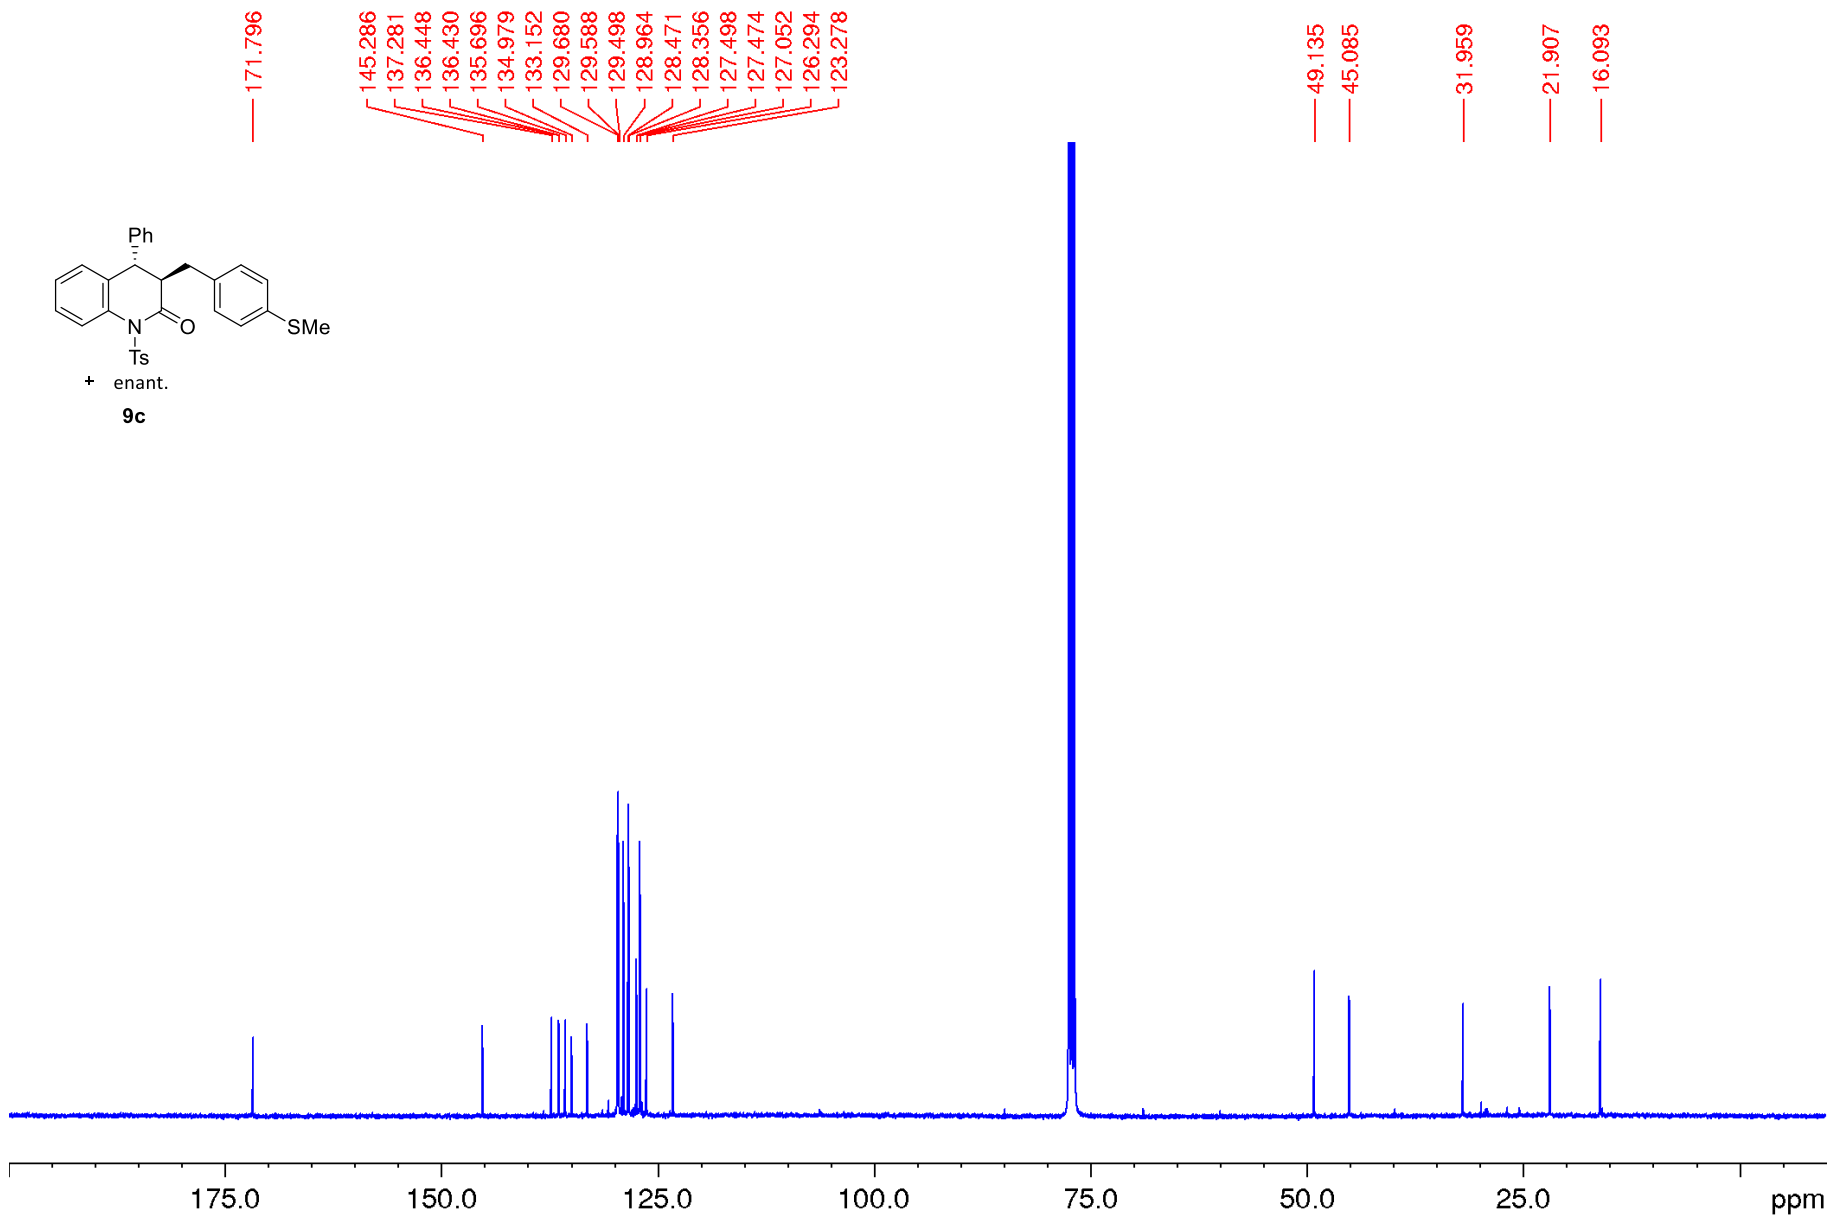

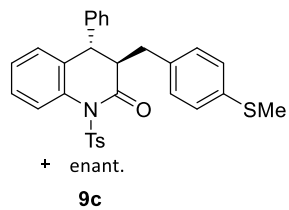

129.663  
129.573  
129.481  
128.947  
128.456  
128.341  
127.480  
127.466  
127.037  
126.278  
123.262

49.122  
45.075

31.946

21.891

16.079

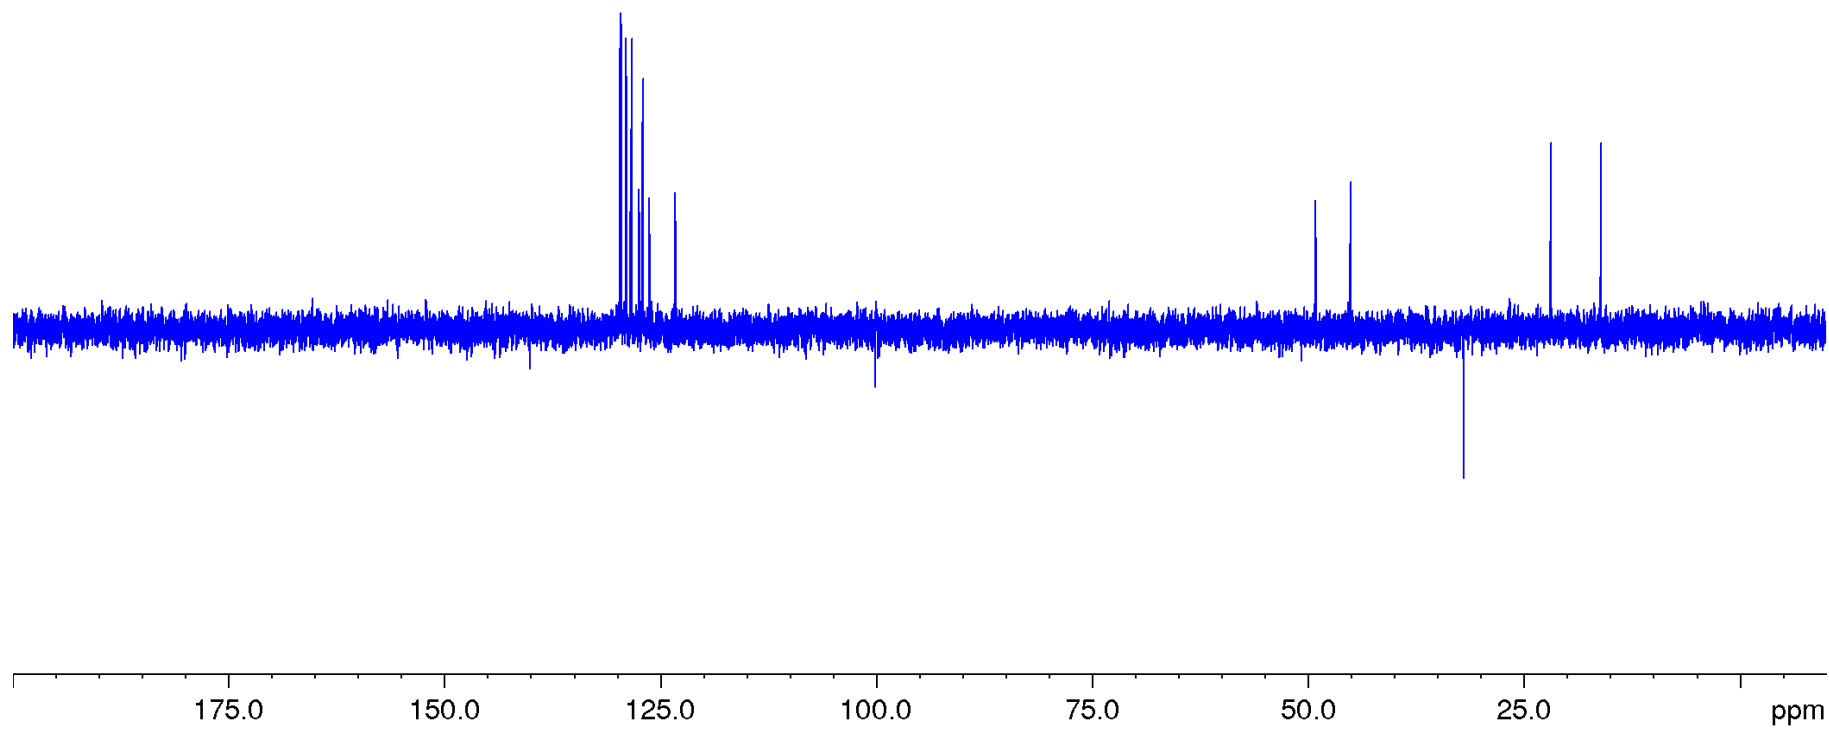

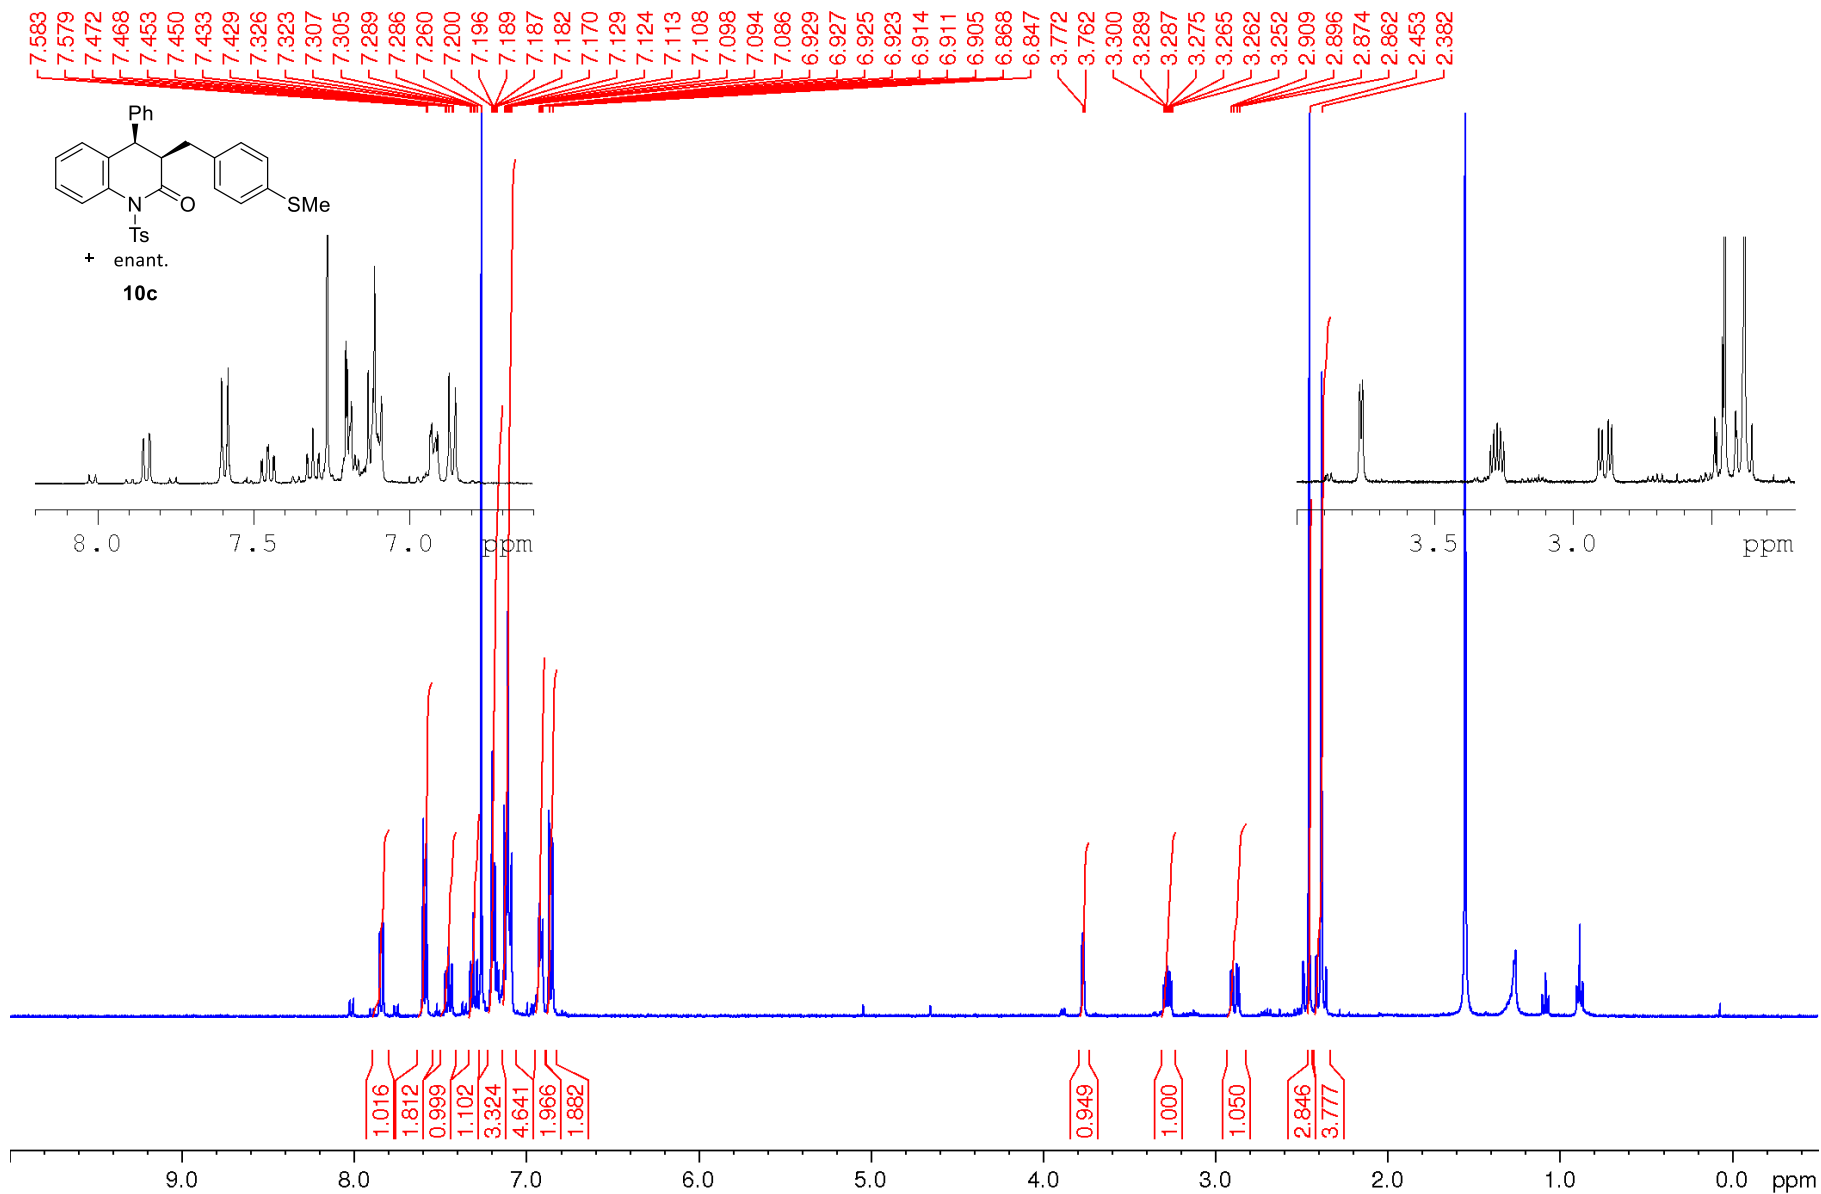



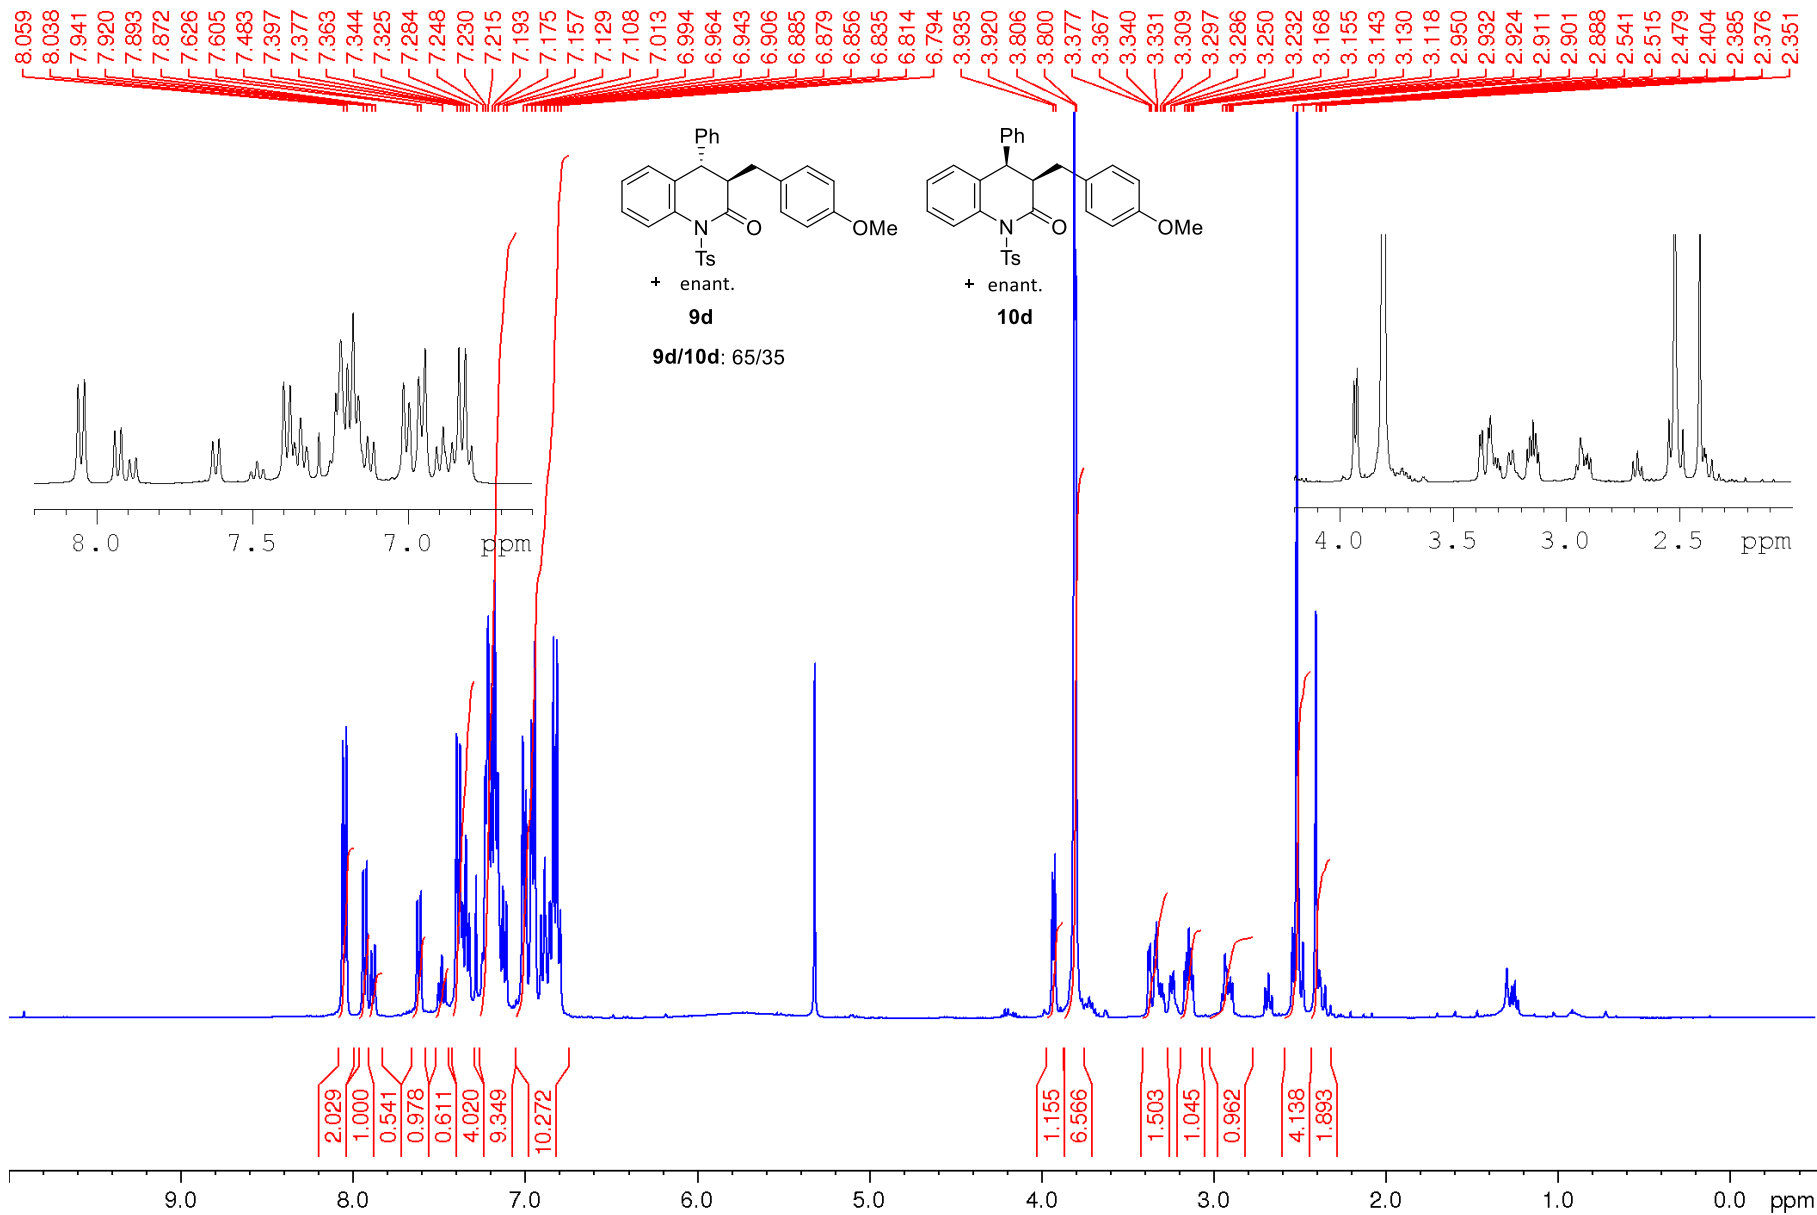

172.252  
171.912  
171.852  
171.852  
161.419  
158.458  
158.217  
145.129  
144.619  
139.484  
137.291  
136.373  
135.863  
134.910  
134.889  
133.186  
130.590  
130.030  
129.904  
129.548  
129.367  
129.344  
129.256  
129.074  
128.804  
128.745  
128.340  
128.272  
127.787  
127.572  
127.324  
127.290  
126.960  
126.420  
126.129  
123.475  
123.153  
120.470  
114.090  
114.061  
114.018  
113.996

55.271  
55.251  
51.888  
49.248  
44.911  
43.560  
34.079  
31.443  
29.760  
21.768  
21.666

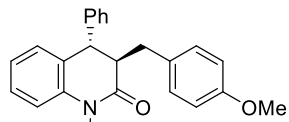

+ enant.

**9d**

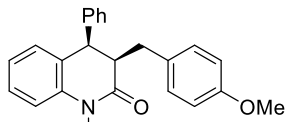

+ enant.

**10d**

**9d/10d: 65/35**

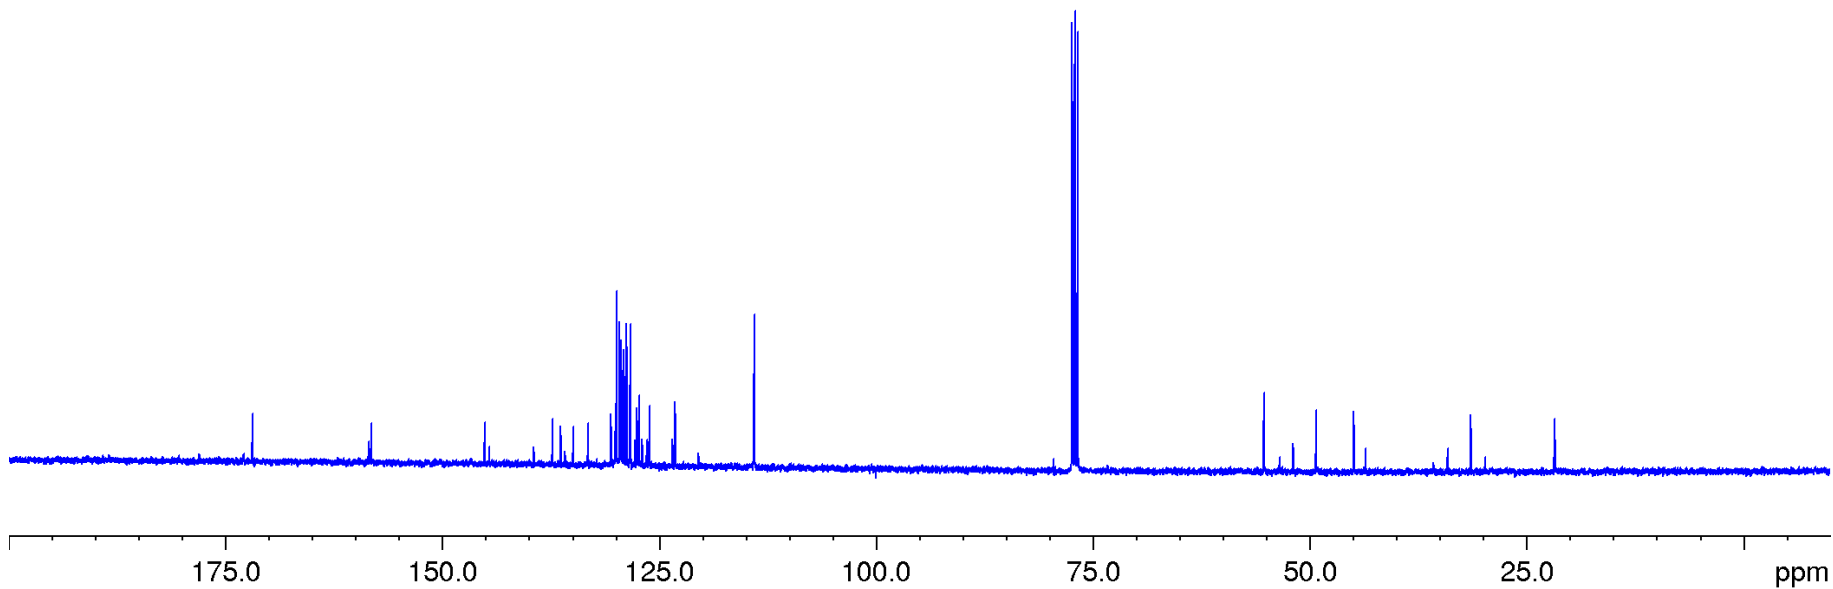

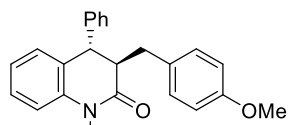

+ enant.

**9d**

**9d/10d: 65/35**

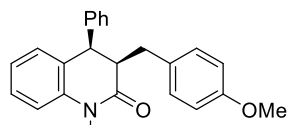

+ enant.

**10d**

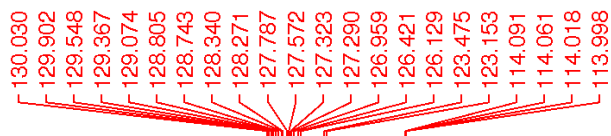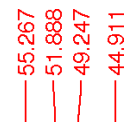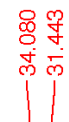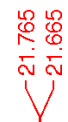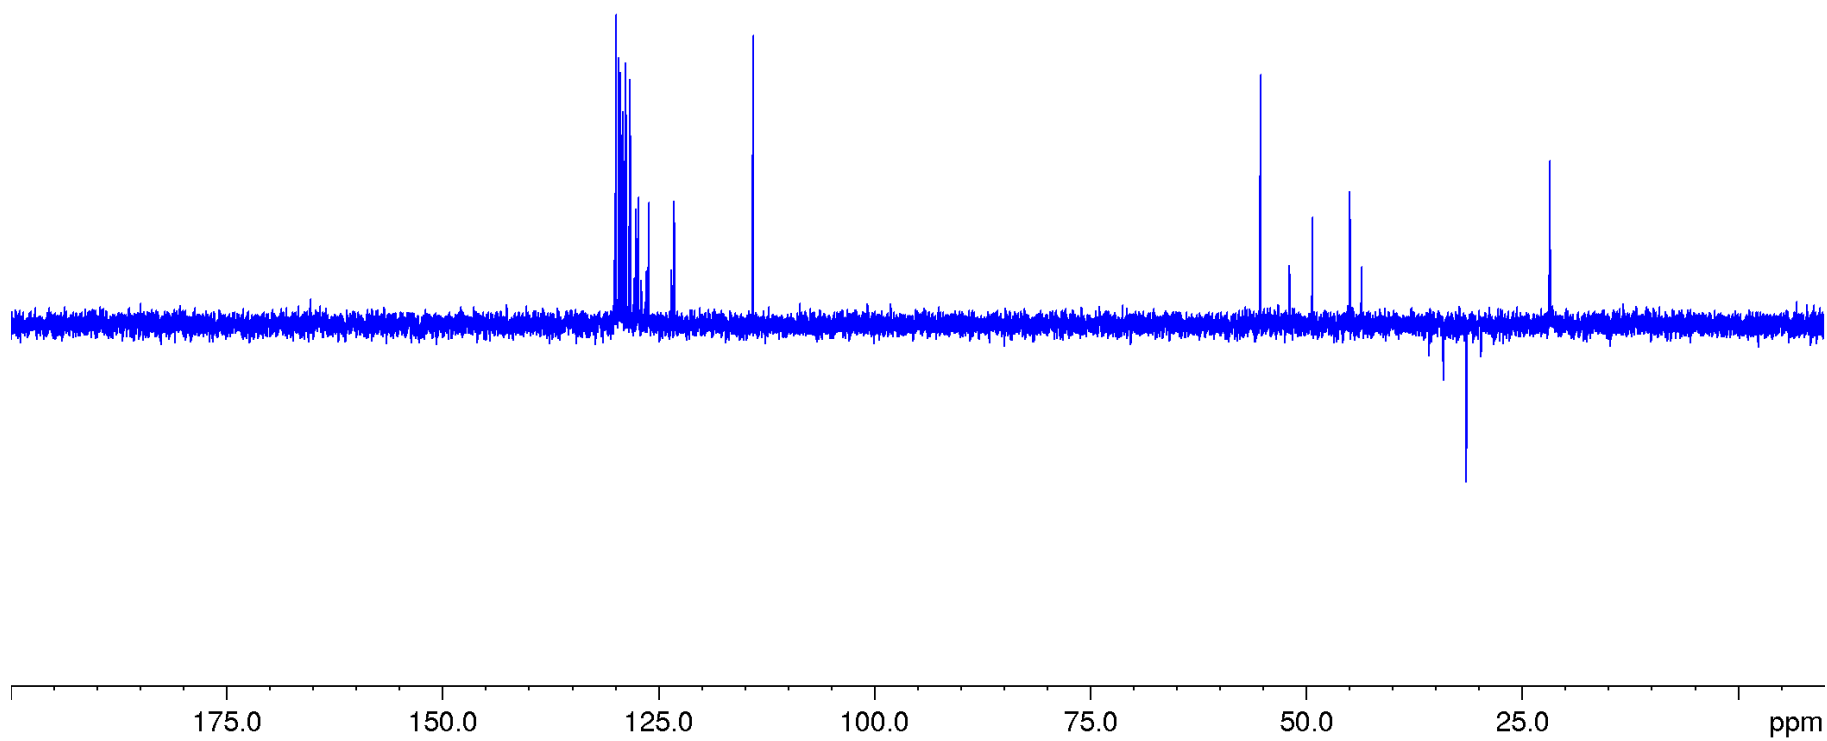

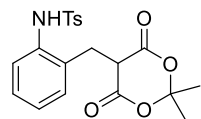

12

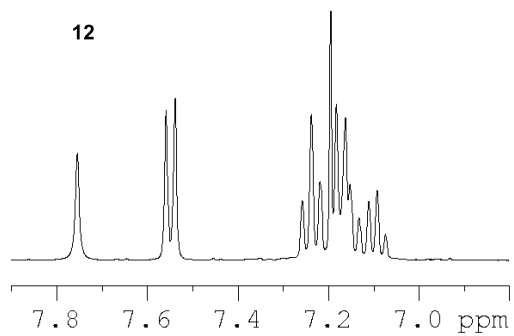

3.683  
3.671  
3.659  
3.003  
2.990  
2.340  
1.691  
1.617

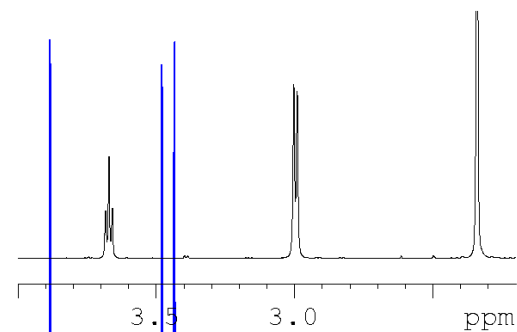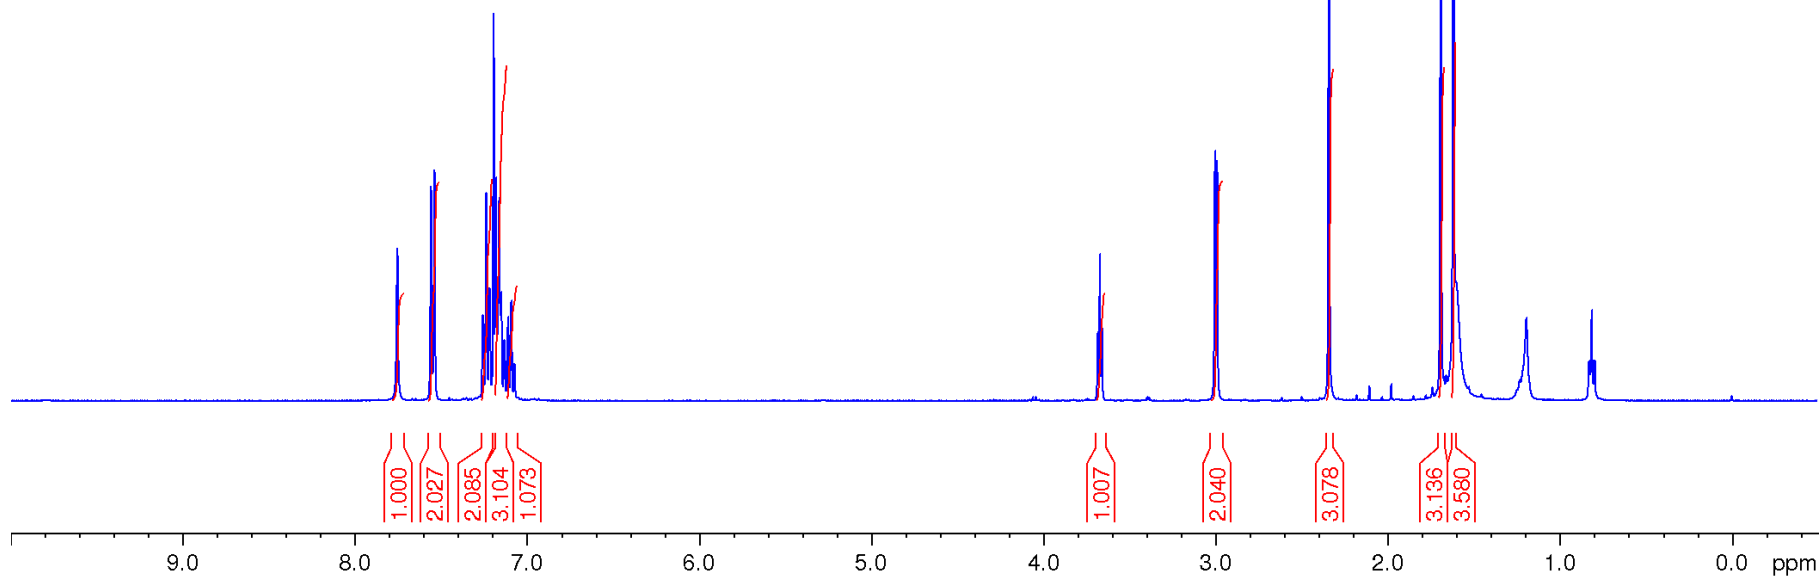

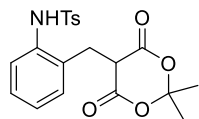

12

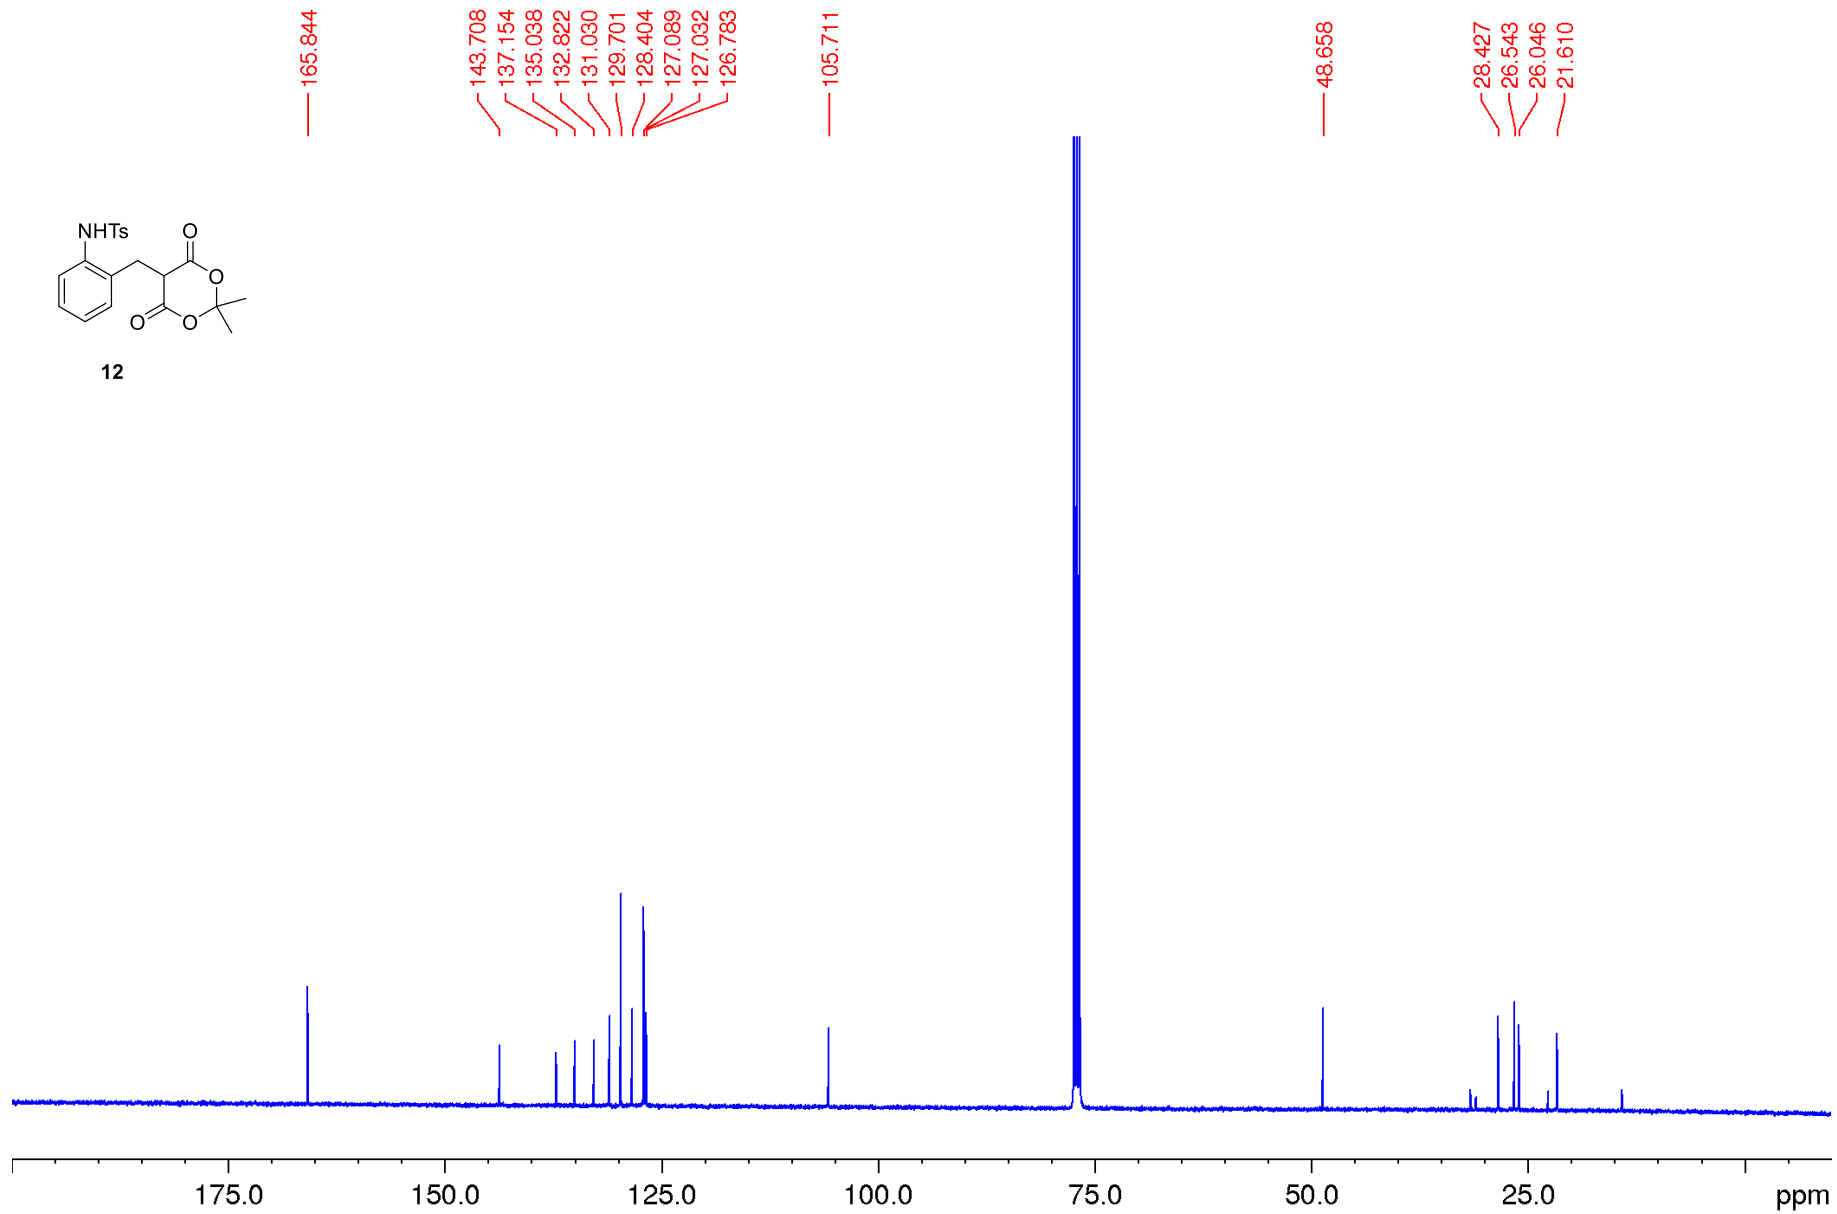



12

131.029  
129.700  
128.403  
127.089  
127.031  
126.782

48.658

28.427  
26.543  
26.047  
21.609

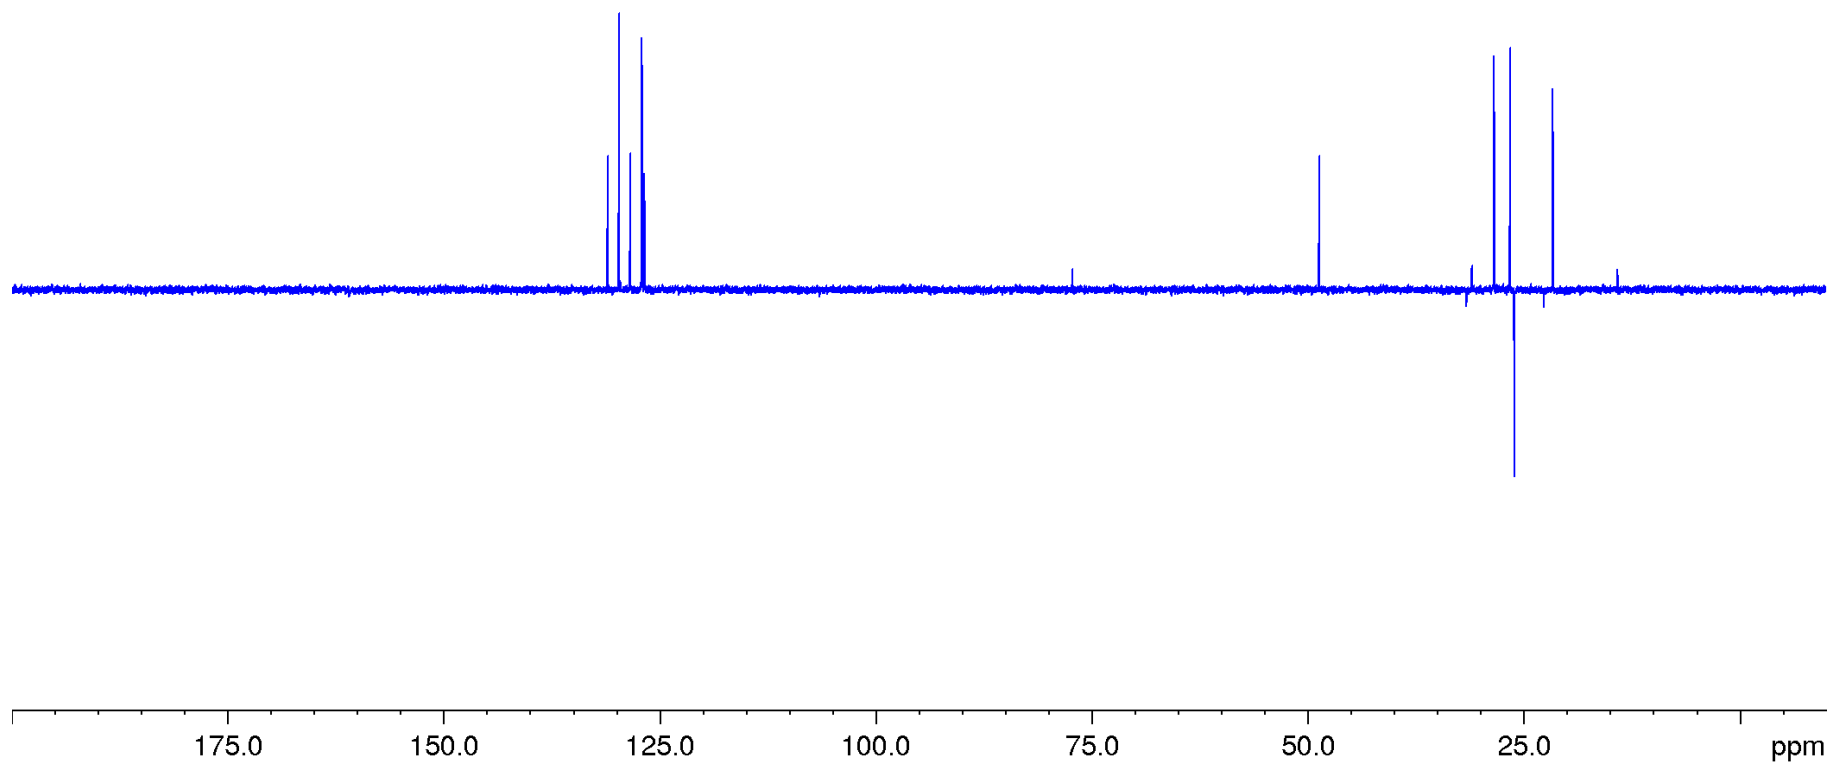

S130

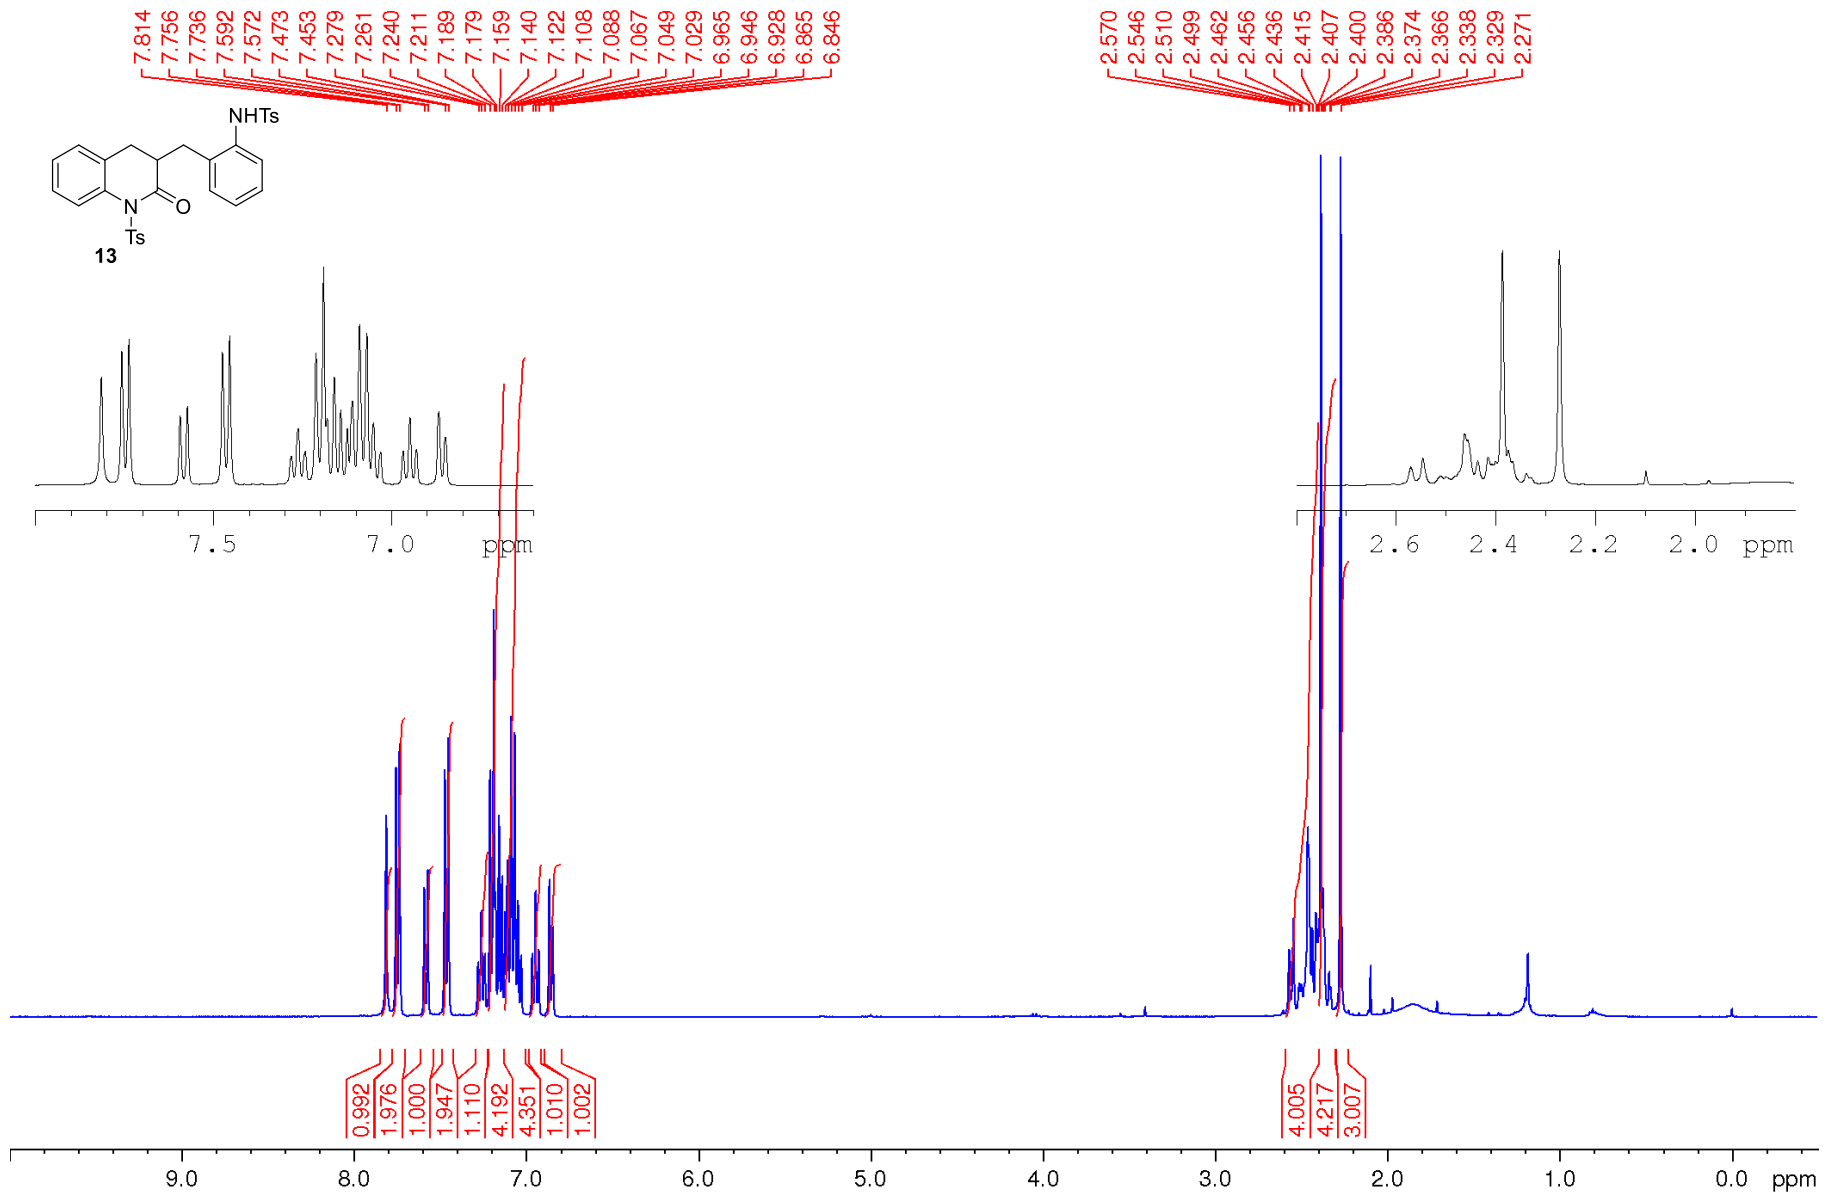

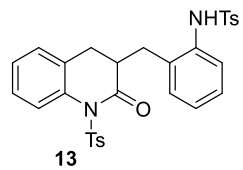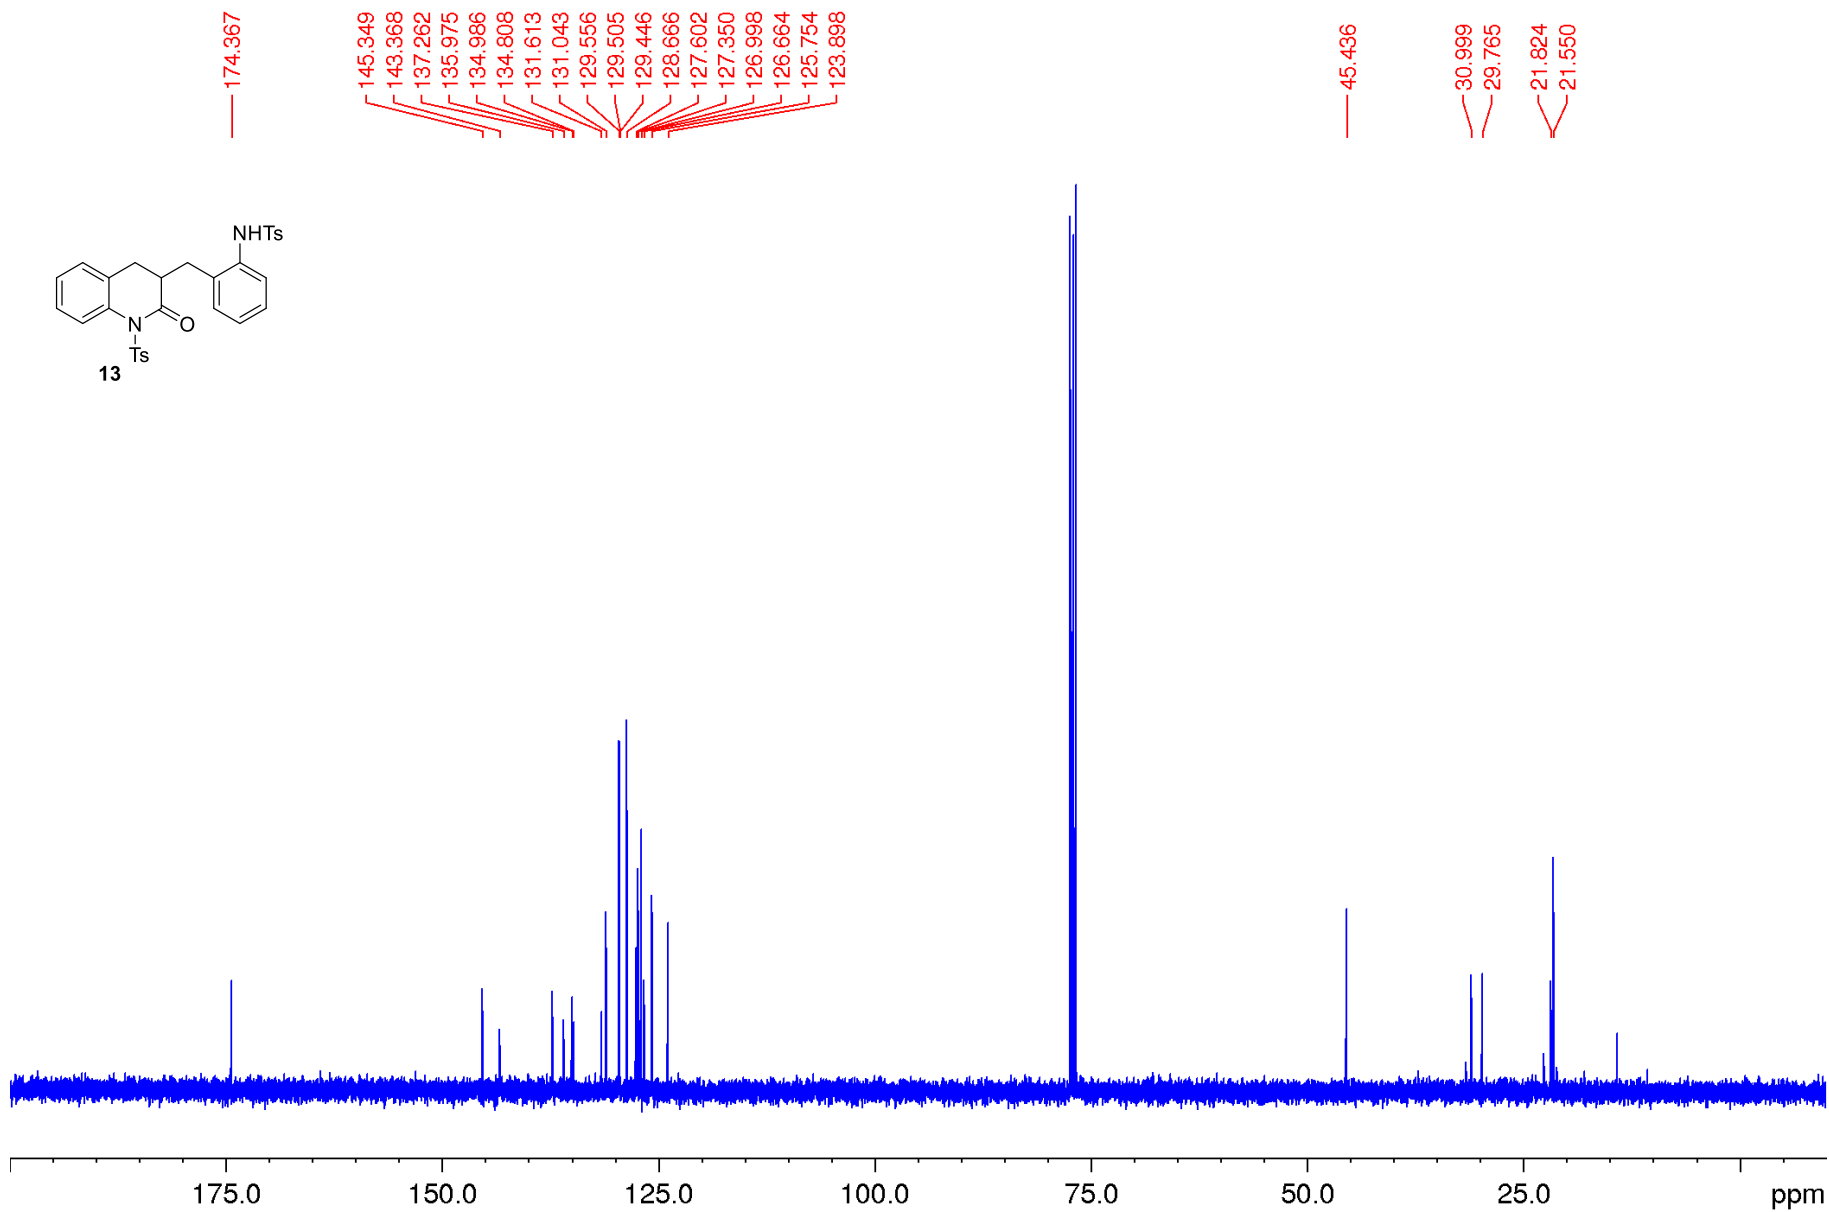





131.043  
129.556  
129.506  
128.666  
127.604  
127.349  
127.000  
126.663  
125.750  
123.898

45.435

31.000  
29.763

21.821  
21.549

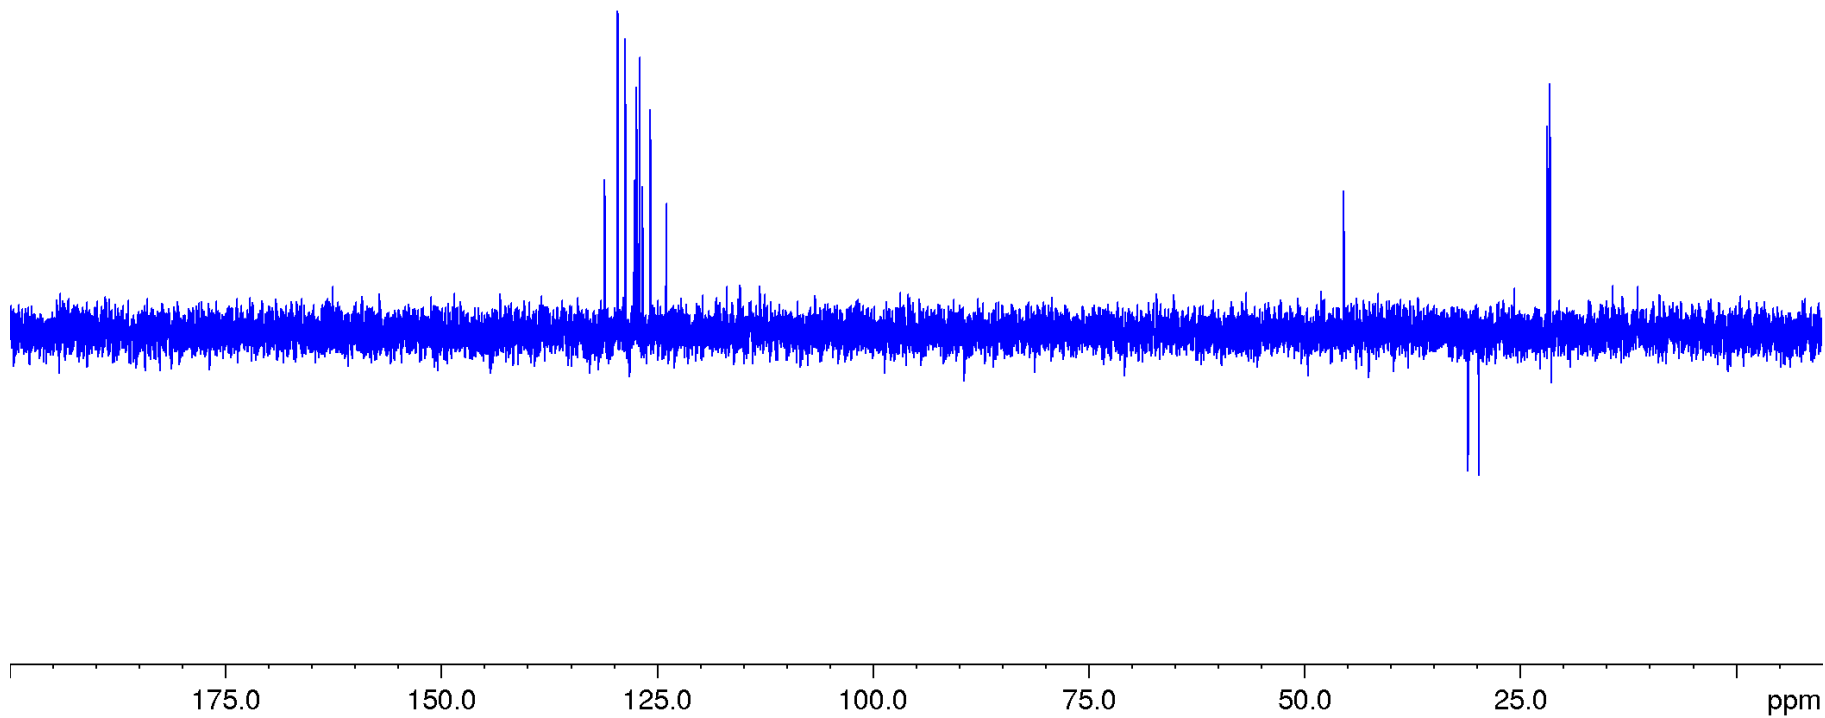

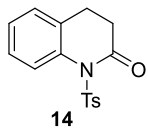

7.876  
7.856  
7.589  
7.569  
7.262  
7.241  
7.215  
7.183  
7.149  
7.131  
7.113

2.712  
2.697  
2.680  
2.498  
2.481  
2.466  
2.362

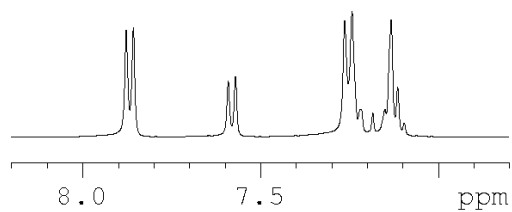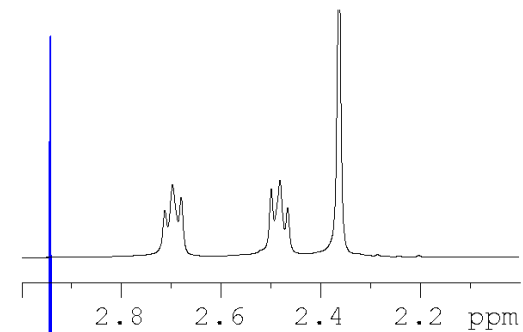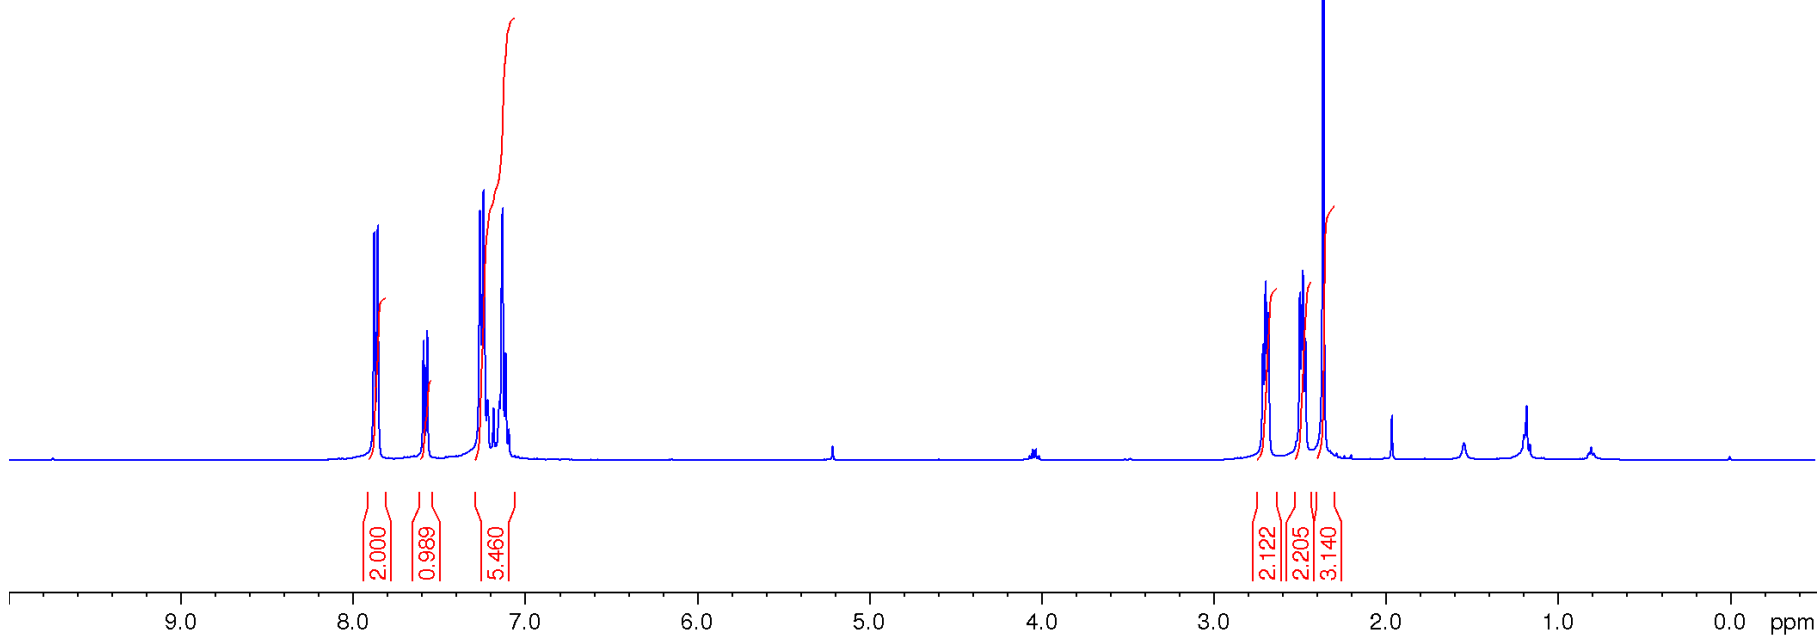

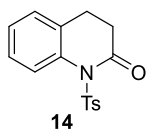

171.517

145.020

136.838

135.892

130.393

129.489

128.650

127.981

127.063

126.247

123.664

35.329

25.267

21.704

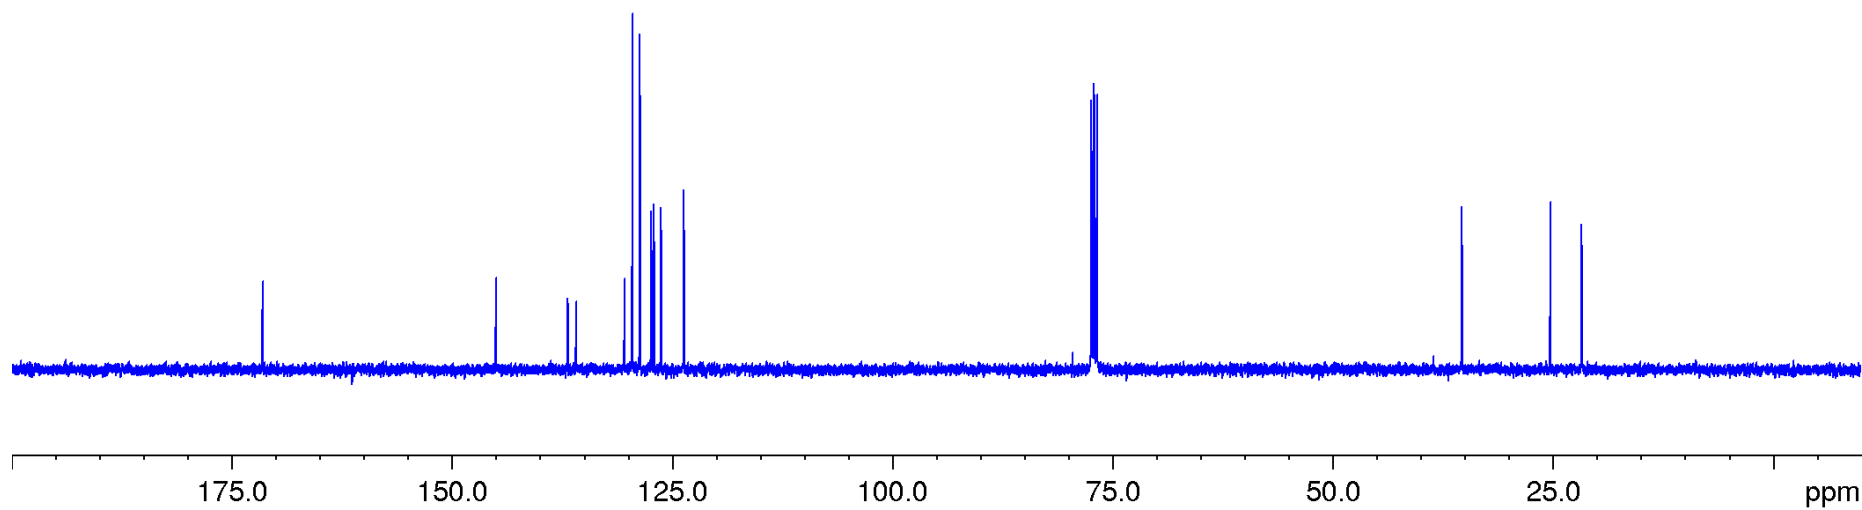



129.489  
128.650  
127.981  
127.063  
126.246  
123.664

35.322

25.259  
21.718  
21.699

175.0

150.0

125.0

100.0

75.0

50.0

25.0

ppm

S136

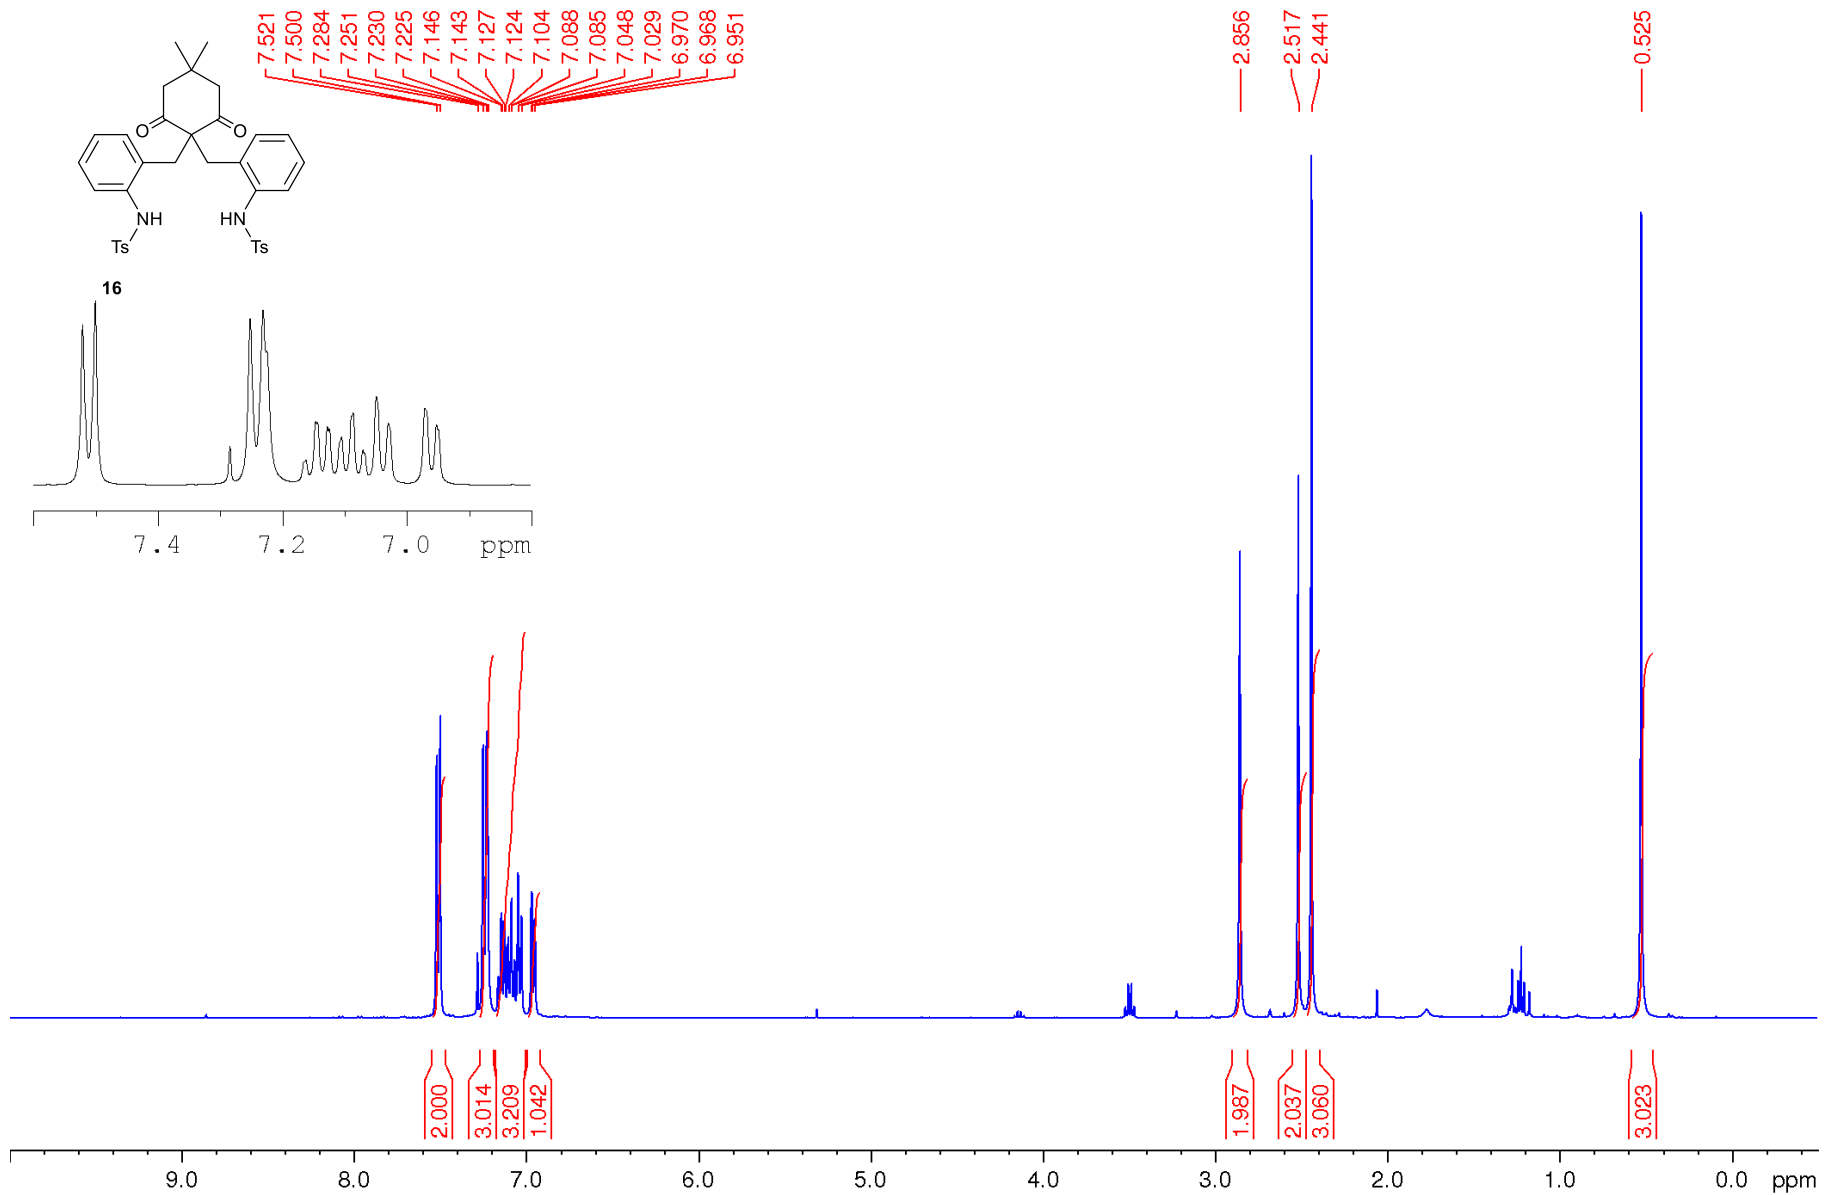

— 213.121

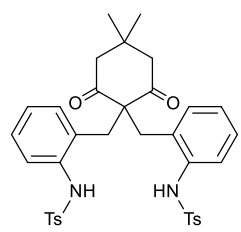

16

143.685  
136.629  
134.960  
132.727  
131.770  
129.550  
128.884  
127.250  
127.175  
126.732

77.365  
77.048  
76.730  
68.902

53.026

36.801  
29.994  
28.309  
21.615

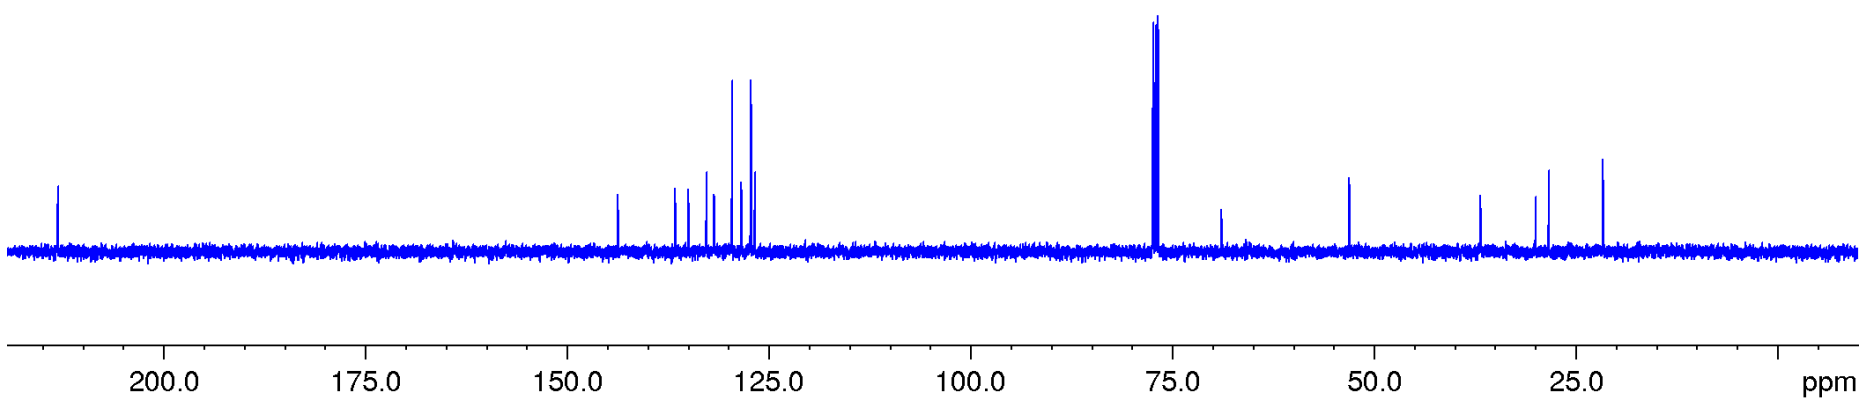

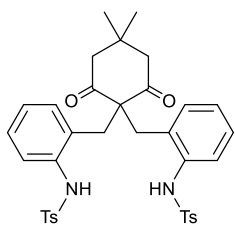

16

132.727  
129.549  
128.383  
127.249  
127.174  
126.731

53.026

36.802

28.310

21.615

175.0

150.0

125.0

100.0

75.0

50.0

25.0

ppm

S139

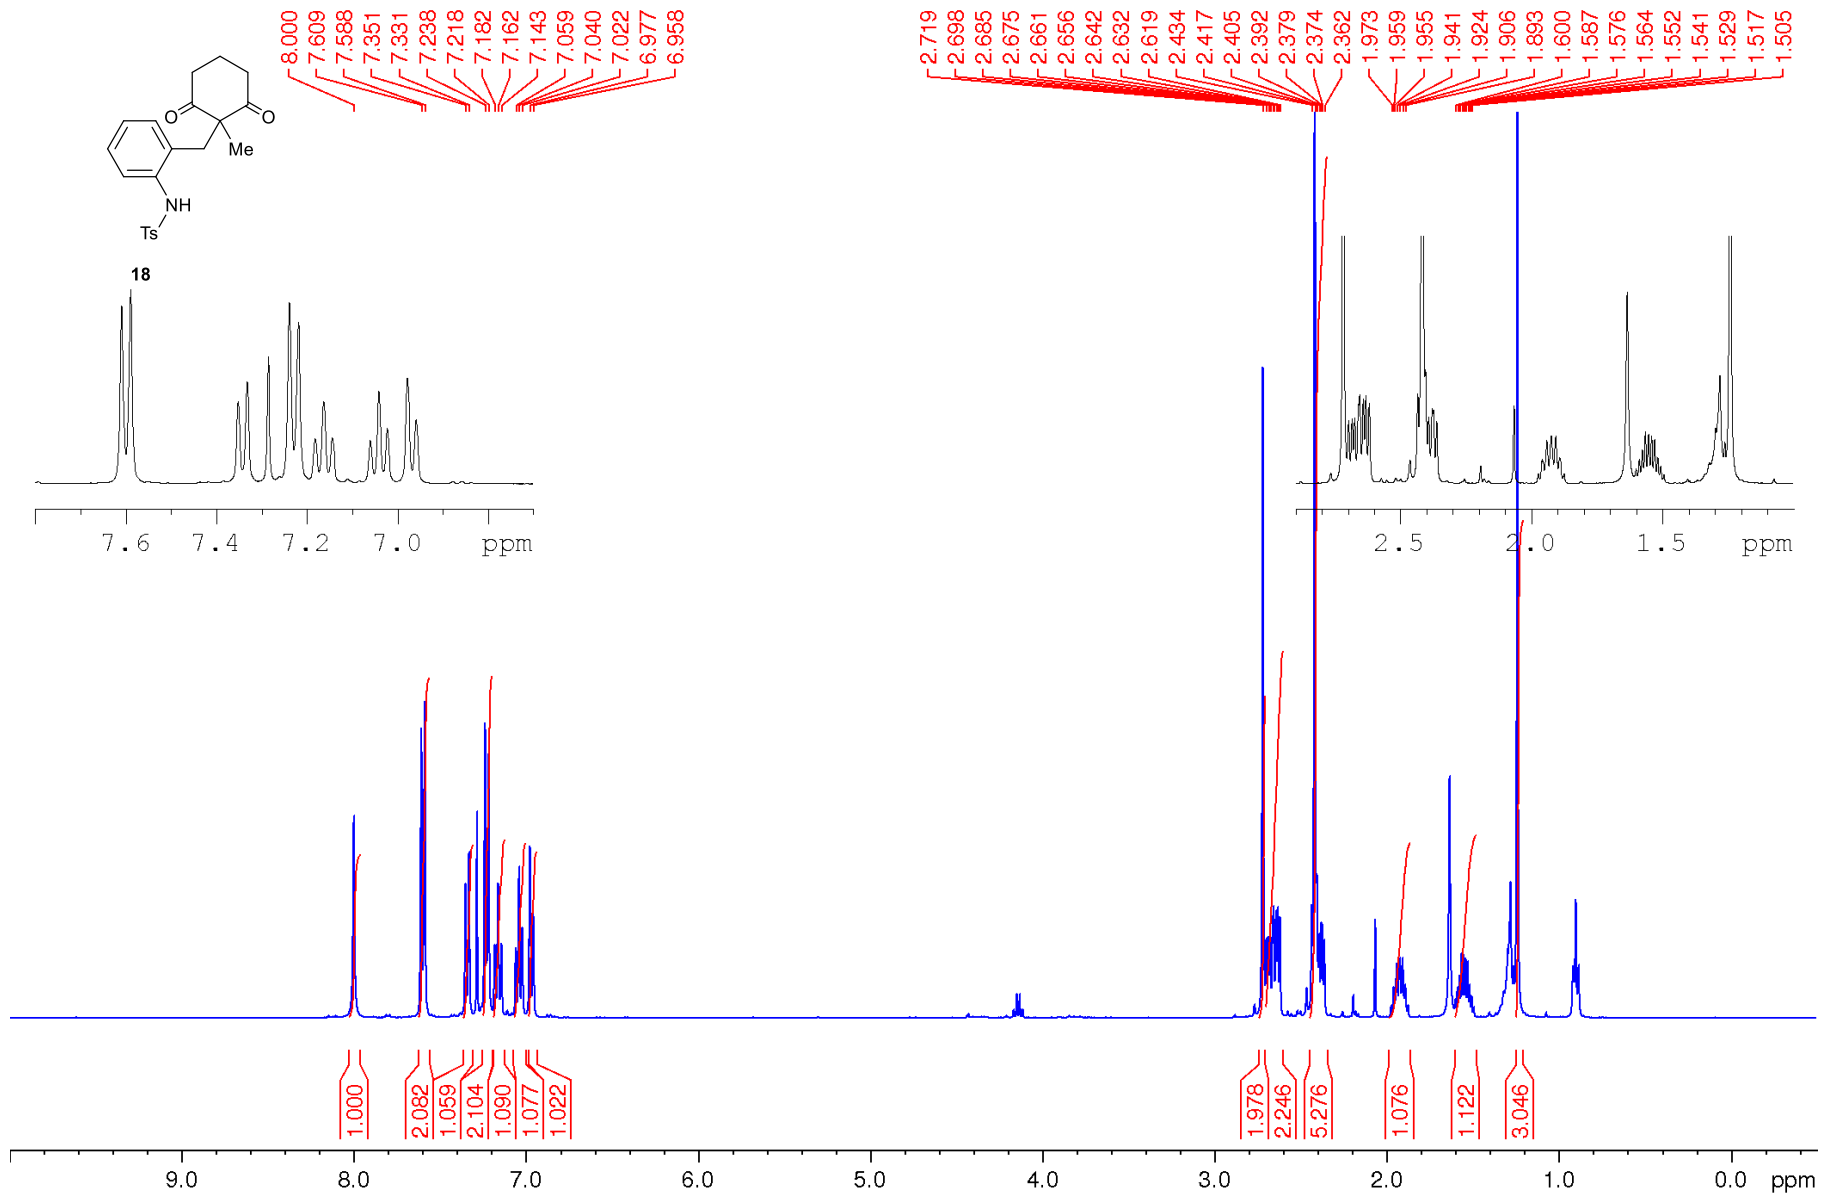



212.442

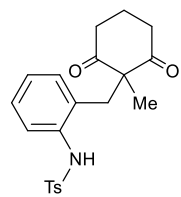

18

143.489  
137.122  
134.906  
131.845  
131.110  
129.520  
127.948  
127.047  
126.362  
126.238

77.394  
77.075  
76.758

65.282

38.677  
34.273

24.928  
21.536  
16.547

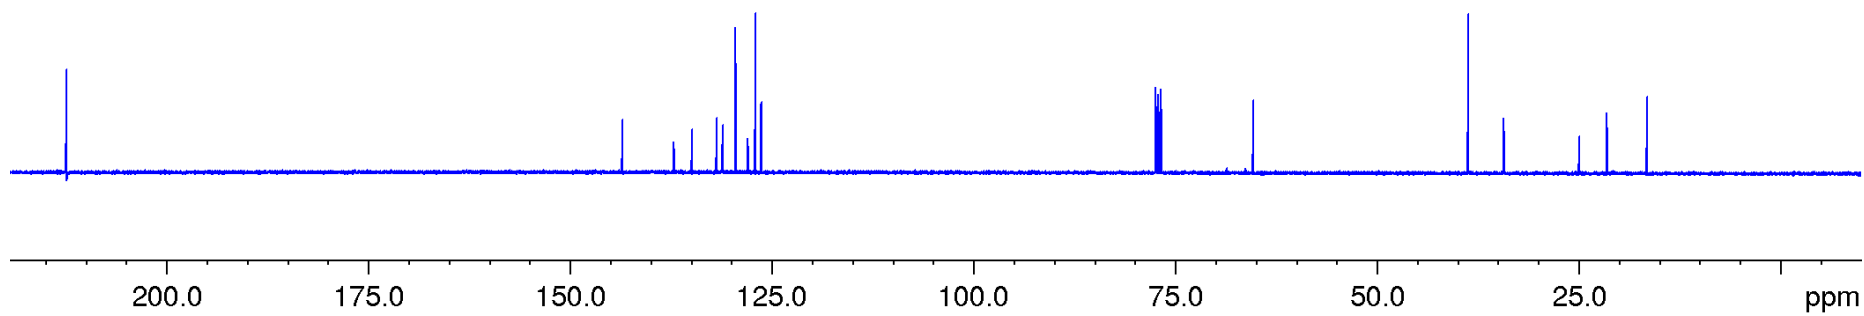

S141

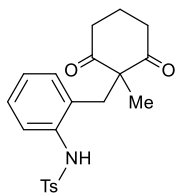

18

131.110  
129.520  
127.947  
127.047  
126.362  
126.238

38.677

34.273

24.929

21.536

16.548

175.0

150.0

125.0

100.0

75.0

50.0

25.0

ppm

S142

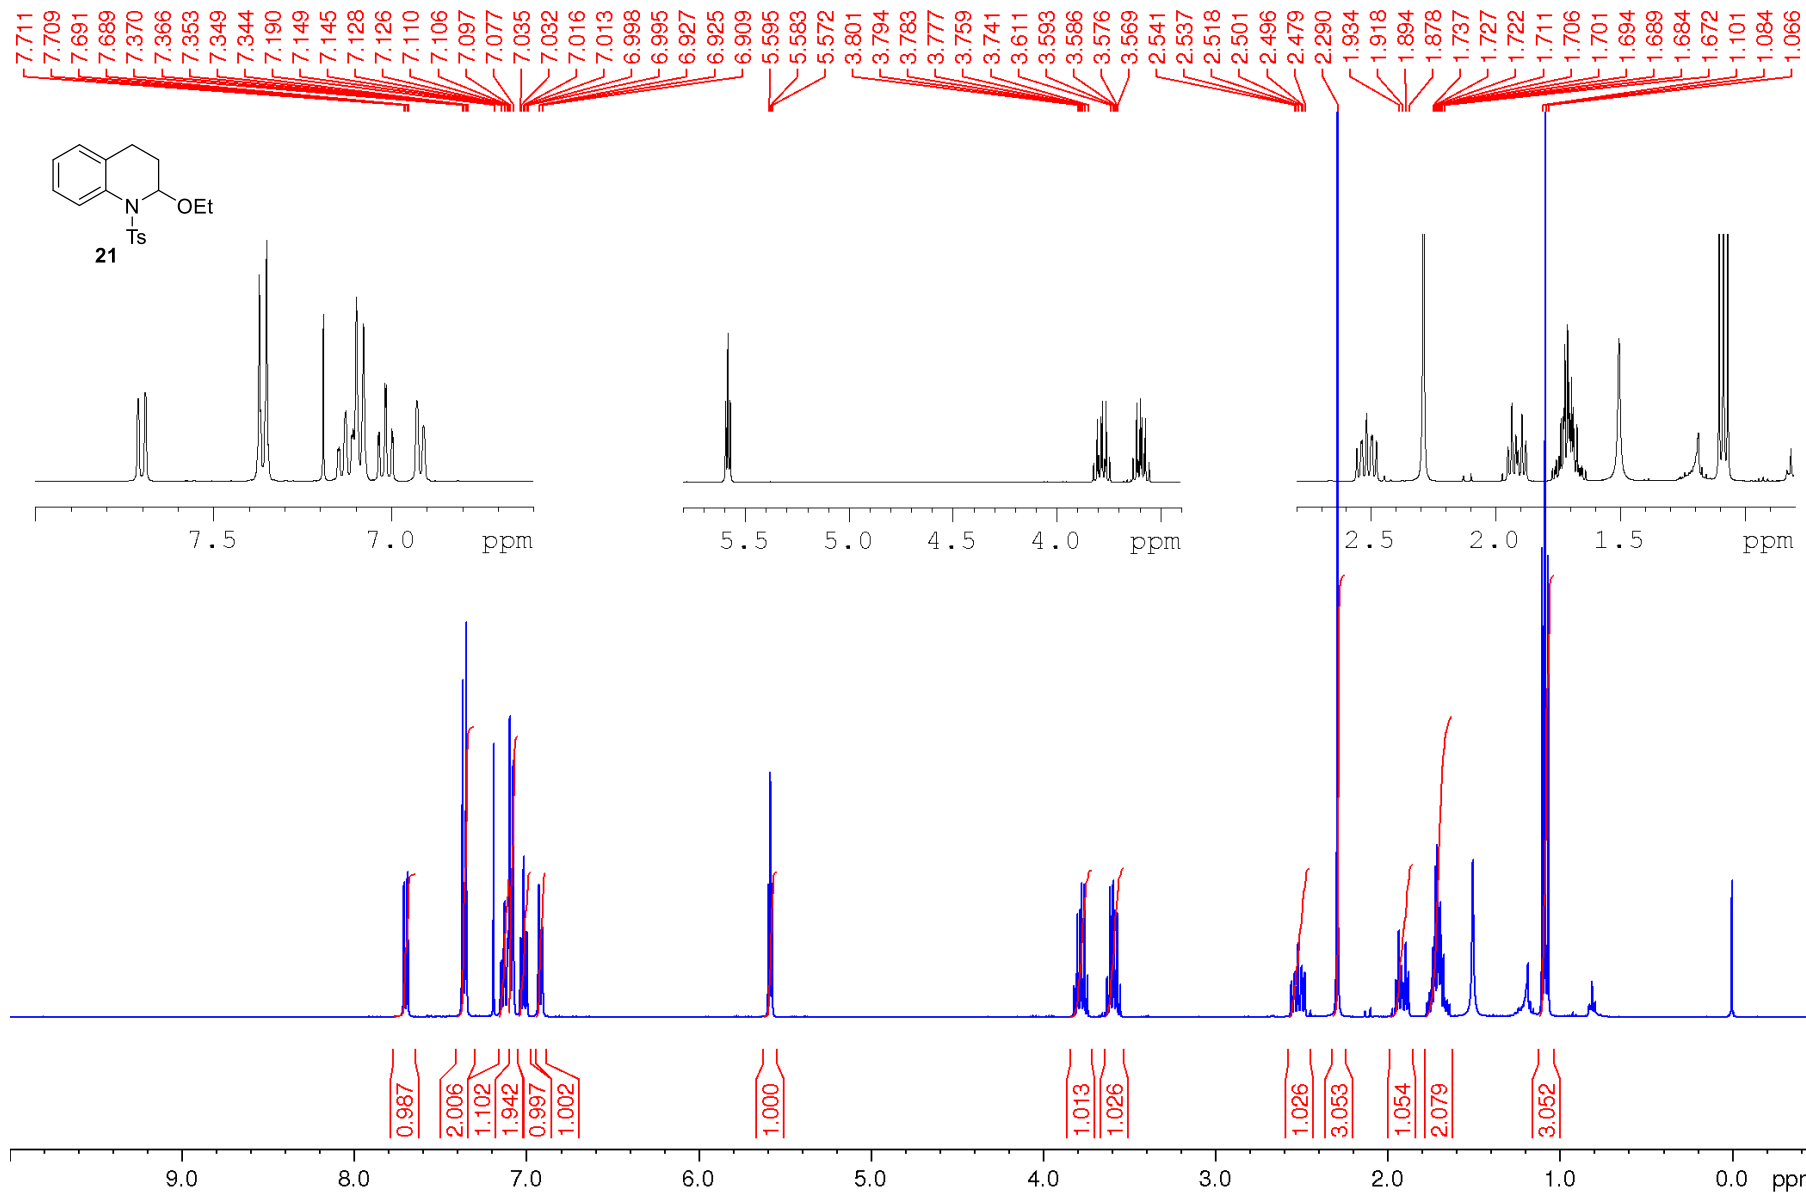

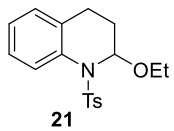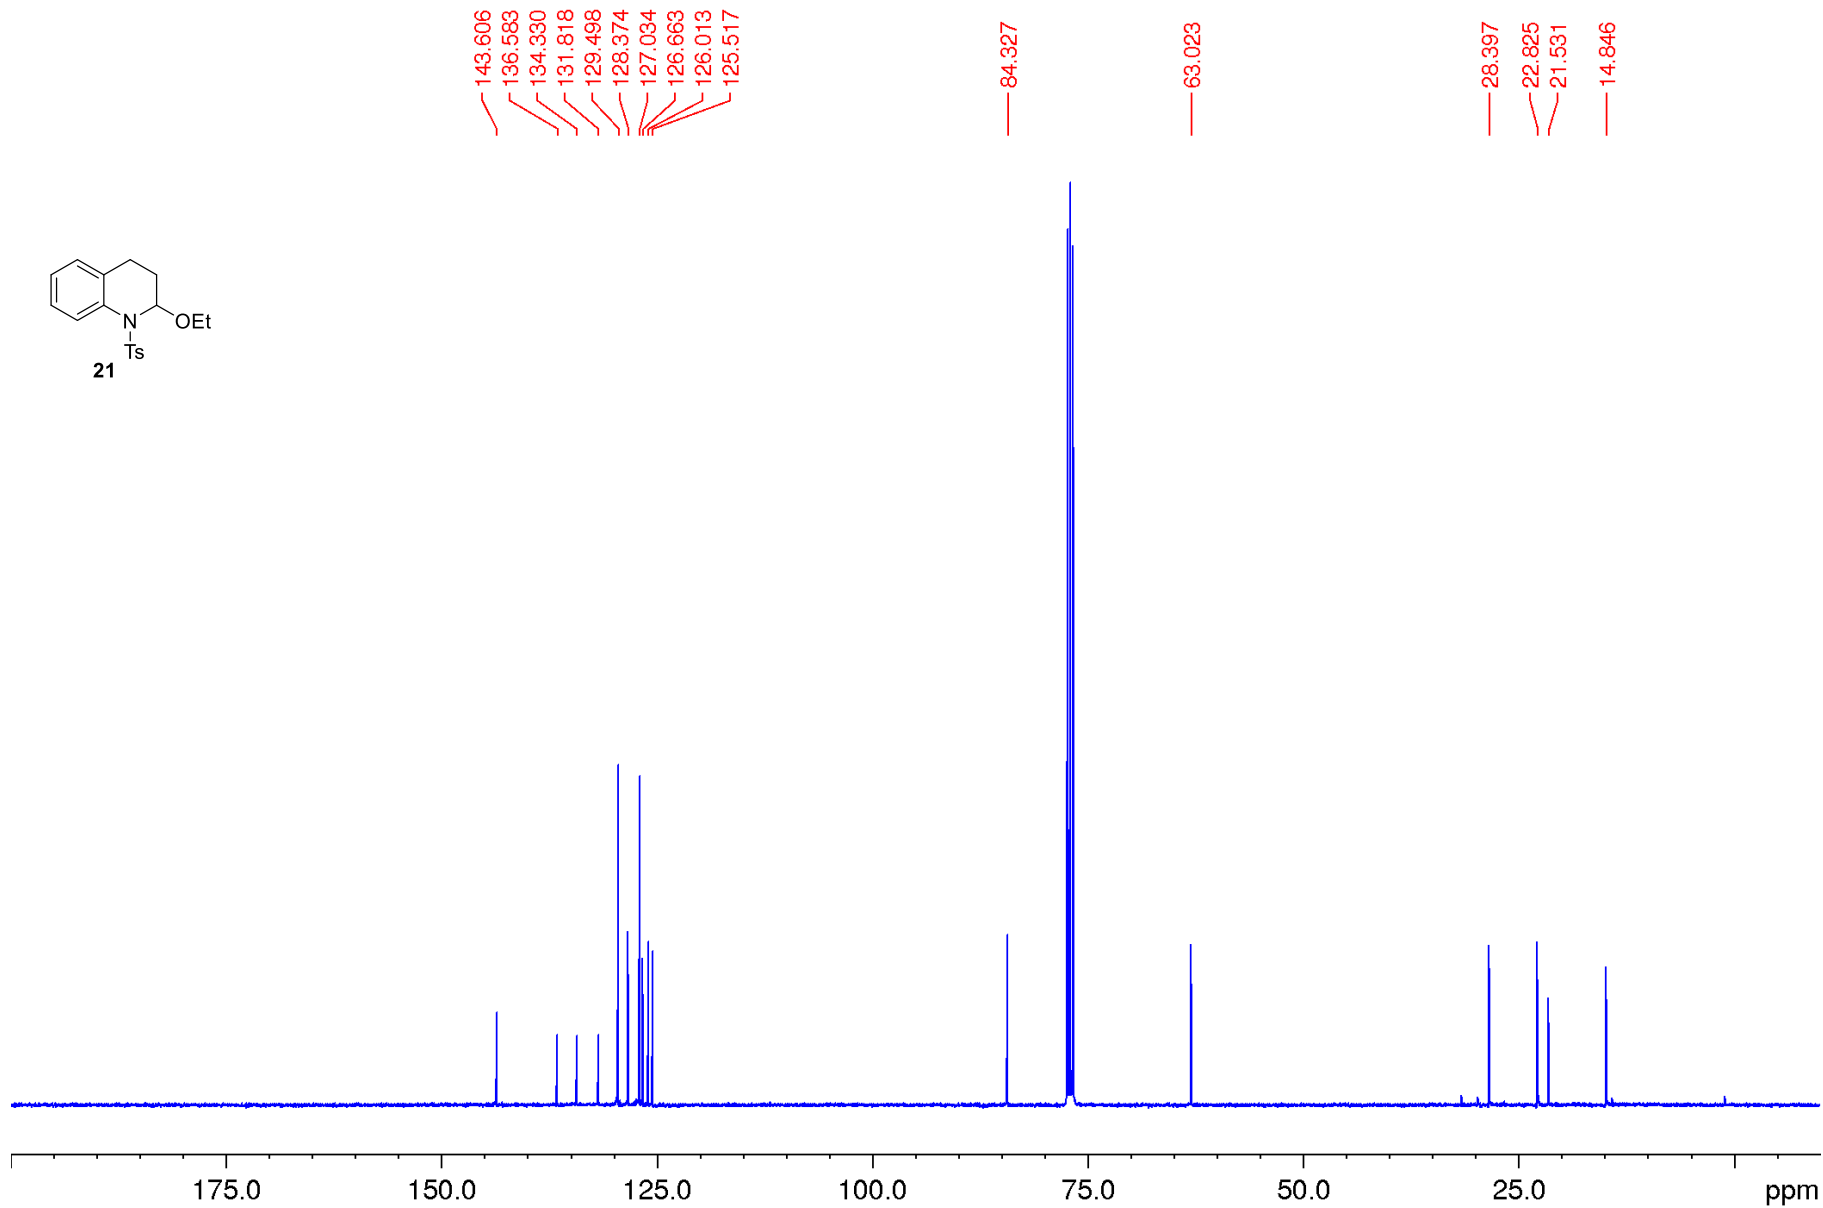

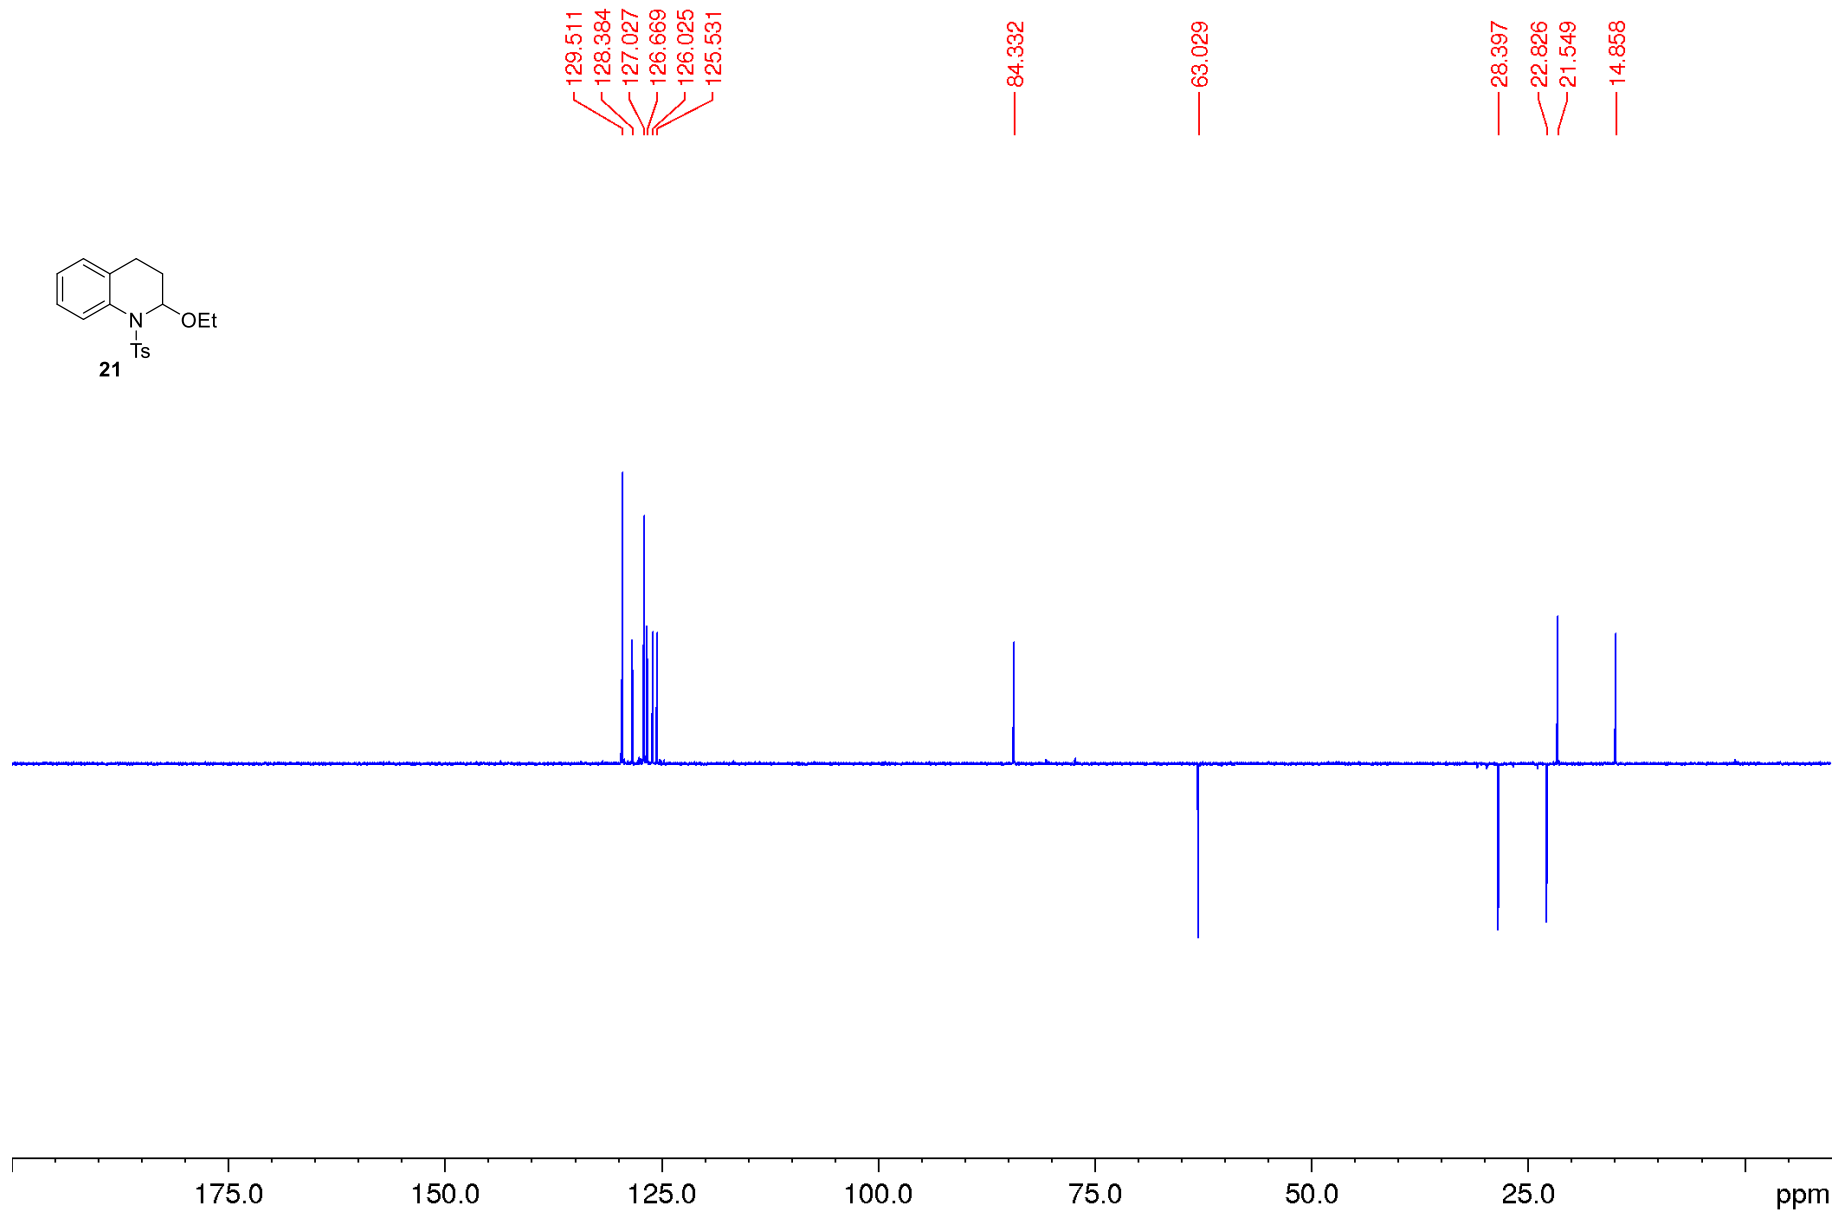

## 2. HF calculations on diastereomers 9 and 10

Calculated by HF/6-31G\* in Titan 1.0.1 2000, Wavefunction inc. 18401, Von Karman Ave., Ste. 370, Irvine, CA, 92612.

### TRANS 1 (AX-AX)

```
| Jaguar version 3.5, release 42
|
|
| Copyright 1991-1998 Schrodinger, Inc.
|
| All Rights Reserved.
|
|
| Use of this program should be acknowledged in publications
as: |
| Jaguar 3.5, Schrodinger, Inc., Portland, Oregon, 1998.
```

```
|
+-----+
-----+
```

```
start of program pre
Job name: WF22668
Executables used: D:\TITAN
Temporary files : C:\Users\gfabr\AppData\Local\Temp\WF22668
```

```
Input file comments:
Molecule001
This file created by Spartan
```

```
basis set:          6-31G**
net molecular charge: 0
multiplicity:       1
```

```
number of basis functions....          370
```

Input geometry:

|      | angstroms     |               |               |
|------|---------------|---------------|---------------|
| atom | x             | y             | z             |
| H1   | 1.1191280000  | 1.6965320000  | -2.2509690000 |
| C1   | 1.4327850000  | 1.6294290000  | -1.2024610000 |
| C2   | 2.2328070000  | 1.4713840000  | 1.4583710000  |
| C3   | 0.5926240000  | 1.0171390000  | -0.2715530000 |
| C4   | 2.6604480000  | 2.1504380000  | -0.8148190000 |
| C5   | 3.0556090000  | 2.0728000000  | 0.5161590000  |
| C6   | 0.9980480000  | 0.9291670000  | 1.0714170000  |
| C7   | -0.7366610000 | 0.4875910000  | -0.7242400000 |
| H3   | 3.3127550000  | 2.6243320000  | -1.5552690000 |
| H4   | 4.0191110000  | 2.4912150000  | 0.8258060000  |
| H6   | 2.5602660000  | 1.4333460000  | 2.5047160000  |
| C16  | -0.6564400000 | -0.9091000000 | -1.2872560000 |

|     |               |               |               |
|-----|---------------|---------------|---------------|
| C8  | -1.7767140000 | 0.5545650000  | 0.4065880000  |
| N2  | 0.1369600000  | 0.3291820000  | 2.0599610000  |
| C9  | -1.2160840000 | 0.0265430000  | 1.7187400000  |
| C11 | 0.7864030000  | -0.3460990000 | 3.2062420000  |
| O1  | -1.8898630000 | -0.5990320000 | 2.5238060000  |
| C18 | -0.5975730000 | -3.4826560000 | -2.3750650000 |
| C19 | -1.6868380000 | -1.3481750000 | -2.1250480000 |
| C20 | 0.4028530000  | -1.7700630000 | -1.0039250000 |
| C21 | 0.4309410000  | -3.0509710000 | -1.5461470000 |
| C22 | -1.6567650000 | -2.6278170000 | -2.6641050000 |
| H2  | -2.5248140000 | -0.6797570000 | -2.3561340000 |
| H5  | 1.2218680000  | -1.4344730000 | -0.3558570000 |
| H7  | 1.2671570000  | -3.7195330000 | -1.3164750000 |
| H8  | -2.4691590000 | -2.9639050000 | -3.3168950000 |
| H9  | -0.5752030000 | -4.4915270000 | -2.7994430000 |
| H10 | -1.1002520000 | 1.1510230000  | -1.5523860000 |
| C10 | -2.2895290000 | 1.9731500000  | 0.6058680000  |
| H11 | -1.4766350000 | 2.6771600000  | 0.8283160000  |
| H12 | -3.0098870000 | 2.0227780000  | 1.4327030000  |
| H13 | -2.7989650000 | 2.3360840000  | -0.2969260000 |
| H14 | -2.6432040000 | -0.0942940000 | 0.1178860000  |
| H15 | 1.7587900000  | -0.7715170000 | 2.9196000000  |
| H16 | 0.1662720000  | -1.1625360000 | 3.6017490000  |
| H17 | 0.9497620000  | 0.3775990000  | 4.0170460000  |

Molecular weight: 251.13 amu

Stoichiometry: C17NH17O

Molecular Point Group: C1

Point Group used: C1

nuclear repulsion energy..... 1408.065361920 hartrees

Non-default options chosen:

Geometry will be optimized in redundant internal coordinates

Initial Hessian: from previous calculation

end of program pre

start of program onee

smallest eigenvalue of S: 3.619E-04

number of canonical orbitals..... 368

end of program onee

start of program hfig

initial wavefunction generated automatically from atomic wavefunctions

| Irreducible representation | Total no orbitals | No of occupied orbitals |         |     |
|----------------------------|-------------------|-------------------------|---------|-----|
|                            |                   | Shell_1                 | Shell_2 | ... |
| No Symm                    | 368               | 67                      |         |     |

S147

-----  
Orbital occupation/shell 1.000

end of program hfig

start of program probe  
end of program probe

start of program grid

number of gridpoints:

| atom     | H1  | C1  | C2  | C3  | C4  | C5  | C6  |
|----------|-----|-----|-----|-----|-----|-----|-----|
| C7       |     |     |     |     |     |     |     |
| grid # 1 | 72  | 88  | 88  | 90  | 89  | 89  | 87  |
| 81       |     |     |     |     |     |     |     |
| grid # 2 | 116 | 95  | 96  | 100 | 97  | 97  | 99  |
| 90       |     |     |     |     |     |     |     |
| grid # 3 | 216 | 183 | 184 | 191 | 184 | 184 | 187 |
| 173      |     |     |     |     |     |     |     |
| grid # 4 | 223 | 326 | 328 | 338 | 327 | 327 | 329 |
| 309      |     |     |     |     |     |     |     |

number of gridpoints:

| atom     | H3  | H4  | H6  | C16 | C8  | N2  | C9  |
|----------|-----|-----|-----|-----|-----|-----|-----|
| C11      |     |     |     |     |     |     |     |
| grid # 1 | 73  | 73  | 70  | 90  | 82  | 98  | 85  |
| 73       |     |     |     |     |     |     |     |
| grid # 2 | 118 | 118 | 113 | 100 | 91  | 106 | 94  |
| 80       |     |     |     |     |     |     |     |
| grid # 3 | 224 | 223 | 209 | 196 | 174 | 218 | 179 |
| 150      |     |     |     |     |     |     |     |
| grid # 4 | 232 | 232 | 219 | 342 | 310 | 397 | 300 |
| 283      |     |     |     |     |     |     |     |

number of gridpoints:

| atom     | O1  | C18 | C19 | C20 | C21 | C22 | H2  |
|----------|-----|-----|-----|-----|-----|-----|-----|
| H5       |     |     |     |     |     |     |     |
| grid # 1 | 111 | 89  | 88  | 89  | 89  | 89  | 70  |
| 71       |     |     |     |     |     |     |     |
| grid # 2 | 122 | 97  | 96  | 95  | 97  | 97  | 113 |
| 111      |     |     |     |     |     |     |     |
| grid # 3 | 260 | 185 | 184 | 183 | 185 | 185 | 214 |
| 213      |     |     |     |     |     |     |     |
| grid # 4 | 459 | 328 | 328 | 328 | 327 | 328 | 221 |
| 217      |     |     |     |     |     |     |     |

number of gridpoints:

| atom | H7 | H8 | H9 | H10 | C10 | H11 | H12 |
|------|----|----|----|-----|-----|-----|-----|
| H13  |    |    |    |     |     |     |     |



```

grid # 1      73      73      73      68      73      72      71
71
grid # 2      118     118     118     107     80      109     111
110
grid # 3      224     224     224     205     152     218     220
216
grid # 4      232     232     232     203     297     221     225
221

```

number of gridpoints:

| atom     | H14 | H15 | H16 | H17 | total |
|----------|-----|-----|-----|-----|-------|
| grid # 1 | 68  | 71  | 71  | 71  | 2879  |
| grid # 2 | 111 | 109 | 110 | 111 | 3750  |
| grid # 3 | 208 | 213 | 216 | 217 | 7221  |
| grid # 4 | 208 | 219 | 221 | 223 | 10092 |

end of program grid

start of program rwr

end of program rwr

start of program scf

```

number of electrons..... 134
number of alpha electrons.... 67
number of beta electrons..... 67
number of orbitals, total.... 368
number of core orbitals..... 67
number of open shell orbs.... 0
number of occupied orbitals.. 67
number of virtual orbitals... 301
number of hamiltonians..... 1
number of shells..... 1

```

SCF type: HF

|      | i  | u | d | i | g |                  | RMS      | maximum |
|------|----|---|---|---|---|------------------|----------|---------|
|      | t  | p | i | c | r |                  | density  | DIIS    |
|      | e  | d | i | u | i | energy           | change   | error   |
|      | r  | t | s | t | d | total energy     |          |         |
| etot | 1  | N | N | 5 | M | -780.39852533395 |          | 1.0E-01 |
| etot | 2  | Y | Y | 6 | M | -782.67625085536 | 2.3E+00  | 4.3E-02 |
| etot | 3  | Y | Y | 6 | M | -782.93254472020 | 2.6E-01  | 2.3E-02 |
| etot | 4  | N | Y | 2 | U | -783.00030881246 | 6.8E-02  | 1.6E-02 |
| etot | 5  | Y | Y | 6 | M | -783.01057256373 | 1.0E-02  | 9.2E-03 |
| etot | 6  | N | Y | 2 | U | -783.01587000907 | 5.3E-03  | 2.0E-03 |
| etot | 7  | Y | Y | 6 | M | -783.01618285999 | 3.1E-04  | 5.5E-04 |
| etot | 8  | Y | Y | 6 | M | -783.01624499366 | 6.2E-05  | 1.6E-04 |
| etot | 9  | N | Y | 2 | U | -783.01614028065 | -1.0E-04 | 4.4E-05 |
| etot | 10 | Y | Y | 6 | M | -783.01614787467 | 7.6E-06  | 3.8E-05 |
| etot | 11 | Y | N | 6 | M | -783.01615200071 | 4.1E-06  | 0.0E+00 |

Energy components, in hartrees:

|     |                               |                   |       |
|-----|-------------------------------|-------------------|-------|
| (A) | Nuclear repulsion.....        | 1408.06536191963  |       |
| (E) | Total one-electron terms..... | -3860.78785845841 |       |
| (I) | Total two-electron terms..... | 1669.70634453807  |       |
| (L) | Electronic energy.....        | -2191.08151392033 | (E+I) |
| (N) | Total energy.....             | -783.01615200071  | (A+L) |

SCFE: SCF energy: HF -783.01615200071 hartrees iterations:  
11

HOMO energy: -0.30356  
LUMO energy: 0.12736

Orbital energies:

|           |           |           |           |           |           |
|-----------|-----------|-----------|-----------|-----------|-----------|
| -20.52960 | -15.60152 | -11.35603 | -11.28995 | -11.26392 | -11.25243 |
| -11.25184 | -11.24506 | -11.24373 | -11.24338 | -11.24180 | -11.24111 |
| -11.23660 | -11.23531 | -11.23528 | -11.23458 | -11.23264 | -11.23175 |
| -11.22896 | -1.37802  | -1.24719  | -1.16508  | -1.14381  | -1.10902  |
| -1.03504  | -1.01651  | -1.01205  | -1.00829  | -0.94853  | -0.93032  |
| -0.85617  | -0.83967  | -0.82837  | -0.81815  | -0.79129  | -0.72886  |
| -0.70636  | -0.69621  | -0.66671  | -0.64354  | -0.63966  | -0.63669  |
| -0.62438  | -0.61229  | -0.60496  | -0.59621  | -0.59273  | -0.58149  |
| -0.58042  | -0.56346  | -0.54466  | -0.54100  | -0.53137  | -0.52118  |
| -0.51494  | -0.50164  | -0.49630  | -0.49416  | -0.48351  | -0.46786  |
| -0.46684  | -0.41857  | -0.40863  | -0.34217  | -0.33272  | -0.32150  |
| -0.30356  | 0.12736   | 0.13083   | 0.14229   | 0.14682   | 0.19439   |
| 0.22478   | 0.23269   | 0.23931   | 0.25591   | 0.28182   |           |

end of program scf

start of program derla  
end of program derla

start of program rwr  
end of program rwr

start of program derlb

forces (hartrees/bohr) : total

| atom | label | x            | y             | z            |
|------|-------|--------------|---------------|--------------|
| 1    | H1    | 3.282581E-03 | -1.437197E-03 | 1.418645E-02 |
| 2    | C1    | 2.298364E-03 | 1.660870E-03  | 5.083617E-04 |
| 3    | C2    | 1.272136E-03 | -1.561267E-03 | 7.524506E-03 |
| 4    | C3    | 9.983834E-03 | 1.150637E-02  | 3.755712E-03 |

|       |       |               |               |               |
|-------|-------|---------------|---------------|---------------|
| 5     | C4    | 6.631700E-03  | 4.472319E-03  | -8.542985E-03 |
| 6     | C5    | 6.115223E-03  | 1.820293E-03  | 6.730213E-04  |
| 7     | C6    | -7.835891E-03 | 2.216502E-03  | 8.256945E-03  |
| 8     | C7    | -1.087968E-02 | 1.111272E-02  | -1.206579E-02 |
| 9     | H3    | -8.150986E-03 | -5.736693E-03 | 9.302946E-03  |
| 10    | H4    | -1.242737E-02 | -5.347578E-03 | -3.408193E-03 |
| 11    | H6    | -6.730423E-03 | 3.859971E-04  | -1.594048E-02 |
| 12    | C16   | 2.460625E-03  | -1.147914E-02 | -8.256392E-03 |
| 13    | C8    | -1.206907E-02 | -9.751302E-03 | -6.732659E-03 |
| 14    | N2    | -1.051122E-02 | -1.073566E-02 | -3.416459E-02 |
| 15    | C9    | 1.006629E-02  | -2.618310E-02 | 5.557412E-02  |
| 16    | C11   | -6.139425E-03 | 4.581737E-04  | 8.360836E-03  |
| 17    | O1    | 1.971210E-02  | 2.481345E-02  | -3.659501E-02 |
| 18    | C18   | 1.901707E-03  | -8.667953E-03 | -2.626967E-03 |
| 19    | C19   | -2.547787E-03 | -9.608923E-04 | -1.768933E-03 |
| 20    | C20   | 5.113784E-03  | 2.044606E-03  | 4.667870E-03  |
| 21    | C21   | 4.565050E-03  | -6.593856E-03 | 1.128949E-03  |
| 22    | C22   | -7.827781E-03 | -1.161037E-03 | -4.631446E-03 |
| 23    | H2    | 1.089719E-02  | -8.112877E-03 | 2.377892E-03  |
| 24    | H5    | -1.209344E-02 | -5.945461E-03 | -1.068225E-02 |
| 25    | H7    | -1.036894E-02 | 8.228927E-03  | -2.879715E-03 |
| 26    | H8    | 1.013157E-02  | 4.190342E-03  | 7.851156E-03  |
| 27    | H9    | -1.683267E-04 | 1.253218E-02  | 5.065976E-03  |
| 28    | H10   | 6.333236E-03  | -1.277191E-02 | 1.737267E-02  |
| 29    | C10   | -7.306673E-03 | 1.936632E-02  | 6.872197E-03  |
| 30    | H11   | -5.950012E-03 | -6.201921E-03 | -1.674953E-03 |
| 31    | H12   | 6.039693E-03  | -1.418829E-03 | -6.455421E-03 |
| 32    | H13   | 4.487222E-03  | -4.739483E-03 | 6.206494E-03  |
| 33    | H14   | 1.960896E-02  | 1.184381E-02  | 1.360273E-02  |
| 34    | H15   | -1.087916E-02 | 6.456172E-03  | -1.620599E-03 |
| 35    | H16   | 2.280555E-03  | 1.341945E-02  | -9.737619E-03 |
| 36    | H17   | -8.009202E-04 | -7.383838E-03 | -6.482669E-03 |
| ----- |       |               |               |               |
|       | total | 4.947295E-04  | 3.385128E-04  | -9.778370E-04 |

end of program der1b

start of program geopt 1

geometry optimization step 1

reading input hessian of dimension 108  
in five columns format

Level shifts adjusted to satisfy step-size constraints

Step size: 0.3001025

Cos(theta): 0.7853411

Final level shift: -6.5014507E-02

gradient maximum: 4.7648E-02 . ( 4.5000E-04 )

gradient rms: 1.0796E-02 . ( 3.0000E-04 )  
 step size: 0.30009 trust radius: 0.30000  
 displacement maximum: 1.0985E-01 . ( 1.8000E-03 )  
 displacement rms: 2.7169E-02 . ( 1.2000E-03 )  
 predicted energy change: -1.6979E-02 geom step: 3.0009E-  
 01 full step: 3.0009E-01  
 molecular structure not yet converged...

center of mass moved by:  
 x: 1.4080E-02 y: -1.6582E-02 z: -1.8506E-02

new geometry:

|      | angstroms     |               |               |
|------|---------------|---------------|---------------|
| atom | x             | y             | z             |
| H1   | 1.1353843962  | 1.7223305973  | -2.2079059337 |
| C1   | 1.4426196492  | 1.6586199182  | -1.1764133383 |
| C2   | 2.2139562261  | 1.5013171305  | 1.4552317580  |
| C3   | 0.6024544405  | 1.0279713092  | -0.2696501528 |
| C4   | 2.6607868239  | 2.1967707846  | -0.7949665076 |
| C5   | 3.0387672647  | 2.1174588972  | 0.5284985945  |
| C6   | 0.9979596045  | 0.9360894155  | 1.0596198202  |
| C7   | -0.7263094728 | 0.4665253517  | -0.7161776176 |
| H3   | 3.2949510662  | 2.6722927385  | -1.5220172409 |
| H4   | 3.9762973964  | 2.5412950672  | 0.8490357375  |
| H6   | 2.5252755444  | 1.4666683485  | 2.4835525781  |
| C16  | -0.6533685426 | -0.9435012981 | -1.3054302903 |
| C8   | -1.7392704779 | 0.5514602000  | 0.4459509705  |
| N2   | 0.1565755521  | 0.3112620949  | 2.0121009287  |
| C9   | -1.1658732764 | -0.0035231485 | 1.7456405927  |
| C11  | 0.7319935965  | -0.2551595532 | 3.2300681698  |
| O1   | -1.8539771807 | -0.6179011441 | 2.5119308218  |
| C18  | -0.6338807008 | -3.5116796189 | -2.4149530757 |
| C19  | -1.6828353543 | -1.3638909216 | -2.1522312536 |
| C20  | 0.3814193524  | -1.8313670938 | -1.0265774784 |
| C21  | 0.3937314261  | -3.1063920781 | -1.5749919114 |
| C22  | -1.6795471828 | -2.6305191551 | -2.7027460817 |
| H2   | -2.4839389746 | -0.6851904202 | -2.3957909383 |
| H5   | 1.1793485050  | -1.5359512811 | -0.3750516125 |
| H7   | 1.1978965669  | -3.7867494531 | -1.3394806061 |
| H8   | -2.4705584338 | -2.9315777960 | -3.3660729058 |
| H9   | -0.6231073850 | -4.4970564258 | -2.8468134047 |
| H10  | -1.1072456665 | 1.1151086627  | -1.5005994737 |
| C10  | -2.2542140462 | 1.9850940657  | 0.6783426550  |
| H11  | -1.4441938227 | 2.6806779486  | 0.8760642846  |
| H12  | -2.9352733731 | 2.0107724942  | 1.5224806907  |
| H13  | -2.7872119916 | 2.3287805408  | -0.2022175894 |
| H14  | -2.5869666576 | -0.0884850835 | 0.2355433692  |
| H15  | 1.7072167409  | -0.6857481520 | 2.9916283960  |
| H16  | 0.0570160348  | -1.0141469039 | 3.6144880619  |
| H17  | 0.8658888111  | 0.5142404534  | 4.0024593104  |

nuclear repulsion energy..... 1410.701731739 hartrees

-----  
/ end of geometry optimization iteration 1 /  
-----

end of program geopt

start of program onee  
smallest eigenvalue of S: 3.360E-04  
number of canonical orbitals..... 368  
end of program onee

start of program probe  
end of program probe

start of program grid

number of gridpoints:

| atom     | H1  | C1  | C2  | C3  | C4  | C5  | C6  |
|----------|-----|-----|-----|-----|-----|-----|-----|
| C7       |     |     |     |     |     |     |     |
| grid # 1 | 72  | 86  | 89  | 92  | 89  | 89  | 84  |
| 81       |     |     |     |     |     |     |     |
| grid # 2 | 116 | 95  | 95  | 100 | 97  | 97  | 94  |
| 91       |     |     |     |     |     |     |     |
| grid # 3 | 216 | 182 | 184 | 193 | 182 | 182 | 188 |
| 172      |     |     |     |     |     |     |     |
| grid # 4 | 215 | 326 | 328 | 339 | 326 | 326 | 326 |
| 316      |     |     |     |     |     |     |     |

number of gridpoints:

| atom     | H3  | H4  | H6  | C16 | C8  | N2  | C9  |
|----------|-----|-----|-----|-----|-----|-----|-----|
| C11      |     |     |     |     |     |     |     |
| grid # 1 | 73  | 73  | 70  | 90  | 82  | 95  | 82  |
| 70       |     |     |     |     |     |     |     |
| grid # 2 | 118 | 118 | 113 | 100 | 90  | 106 | 92  |
| 80       |     |     |     |     |     |     |     |
| grid # 3 | 223 | 223 | 210 | 197 | 174 | 215 | 176 |
| 148      |     |     |     |     |     |     |     |
| grid # 4 | 224 | 223 | 209 | 342 | 312 | 392 | 296 |
| 274      |     |     |     |     |     |     |     |

number of gridpoints:

| atom     | O1  | C18 | C19 | C20 | C21 | C22 | H2  |
|----------|-----|-----|-----|-----|-----|-----|-----|
| H5       |     |     |     |     |     |     |     |
| grid # 1 | 111 | 89  | 88  | 89  | 89  | 89  | 70  |
| 72       |     |     |     |     |     |     |     |
| grid # 2 | 122 | 97  | 96  | 95  | 97  | 97  | 113 |
| 112      |     |     |     |     |     |     |     |
| grid # 3 | 260 | 185 | 183 | 183 | 185 | 183 | 213 |
| 212      |     |     |     |     |     |     |     |

grid # 4      455      330      327      327      329      330      214  
 210

number of gridpoints:

| atom     | H7  | H8  | H9  | H10 | C10 | H11 | H12 |
|----------|-----|-----|-----|-----|-----|-----|-----|
| H13      |     |     |     |     |     |     |     |
| grid # 1 | 73  | 73  | 73  | 69  | 73  | 72  | 71  |
| 71       |     |     |     |     |     |     |     |
| grid # 2 | 118 | 118 | 118 | 105 | 80  | 110 | 111 |
| 110      |     |     |     |     |     |     |     |
| grid # 3 | 223 | 223 | 224 | 203 | 149 | 218 | 219 |
| 216      |     |     |     |     |     |     |     |
| grid # 4 | 224 | 224 | 224 | 201 | 287 | 216 | 220 |
| 217      |     |     |     |     |     |     |     |

number of gridpoints:

| atom     | H14 | H15 | H16 | H17 | total |
|----------|-----|-----|-----|-----|-------|
| grid # 1 | 69  | 71  | 71  | 71  | 2871  |
| grid # 2 | 109 | 108 | 106 | 111 | 3735  |
| grid # 3 | 212 | 213 | 214 | 217 | 7200  |
| grid # 4 | 206 | 219 | 213 | 224 | 9971  |

end of program grid

start of program rwr

end of program rwr

start of program scf

|      | i | u | d | i | g |                  | RMS     | maximum |
|------|---|---|---|---|---|------------------|---------|---------|
|      | t | p | i | c | r |                  | energy  | DIIS    |
|      | e | d | i | u | i | total energy     | density | error   |
|      | r | t | s | t | d |                  | change  |         |
| etot | 1 | N | N | 2 | U | -783.01938171043 | 3.1E-04 | 7.1E-03 |
| etot | 2 | Y | Y | 6 | M | -783.03000043113 | 1.1E-02 | 2.1E-03 |
| etot | 3 | N | Y | 2 | U | -783.03106344985 | 1.1E-03 | 7.6E-04 |
| etot | 4 | Y | Y | 6 | M | -783.03119881510 | 1.4E-04 | 2.6E-04 |
| etot | 5 | Y | Y | 6 | M | -783.03121880962 | 2.0E-05 | 8.9E-05 |
| etot | 6 | Y | Y | 6 | M | -783.03122607122 | 7.3E-06 | 3.2E-05 |
| etot | 7 | Y | N | 6 | M | -783.03122787331 | 1.8E-06 | 0.0E+00 |

Energy components, in hartrees:

|     |                               |                   |       |
|-----|-------------------------------|-------------------|-------|
| (A) | Nuclear repulsion.....        | 1410.70173173934  |       |
| (E) | Total one-electron terms..... | -3865.92950785311 |       |
| (I) | Total two-electron terms..... | 1672.19654824046  |       |
| (L) | Electronic energy.....        | -2193.73295961265 | (E+I) |
| (N) | Total energy.....             | -783.03122787331  | (A+L) |

SCFE: SCF energy: HF -783.03122787331 hartrees iterations:  
7

HOMO energy: -0.30459  
LUMO energy: 0.13091

Orbital energies:

|           |           |           |           |           |           |
|-----------|-----------|-----------|-----------|-----------|-----------|
| -20.52749 | -15.60051 | -11.34642 | -11.28806 | -11.25842 | -11.24930 |
| -11.24169 | -11.24151 | -11.24092 | -11.23985 | -11.23904 | -11.23689 |
| -11.23258 | -11.23159 | -11.23058 | -11.23024 | -11.22970 | -11.22775 |
| -11.22403 | -1.39461  | -1.26592  | -1.16468  | -1.14858  | -1.10594  |
| -1.03237  | -1.01829  | -1.01747  | -1.01191  | -0.95489  | -0.93254  |
| -0.85685  | -0.84724  | -0.83382  | -0.82046  | -0.79637  | -0.73948  |
| -0.70805  | -0.69963  | -0.67024  | -0.64928  | -0.64673  | -0.63613  |
| -0.63148  | -0.61408  | -0.61049  | -0.59856  | -0.59365  | -0.58456  |
| -0.57983  | -0.56458  | -0.55067  | -0.54504  | -0.53493  | -0.52320  |
| -0.51862  | -0.50614  | -0.49931  | -0.49565  | -0.48542  | -0.46889  |
| -0.46589  | -0.42132  | -0.40774  | -0.34161  | -0.33299  | -0.32094  |
| -0.30459  | 0.13091   | 0.13291   | 0.14430   | 0.14764   | 0.20850   |
| 0.23002   | 0.23762   | 0.24562   | 0.25861   | 0.28796   |           |

end of program scf

start of program derla  
end of program derla

start of program rwr  
end of program rwr

start of program der1b

forces (hartrees/bohr) : total

| atom | label | x             | y             | z             |
|------|-------|---------------|---------------|---------------|
| 1    | H1    | -1.514374E-04 | -3.096039E-04 | 1.002164E-03  |
| 2    | C1    | 1.301644E-03  | 8.729967E-04  | -1.861714E-03 |
| 3    | C2    | -3.657433E-04 | -2.143944E-03 | 6.648631E-04  |
| 4    | C3    | 2.594005E-03  | 2.719820E-03  | -5.723392E-03 |
| 5    | C4    | -3.147285E-03 | -5.528582E-04 | -5.309929E-03 |
| 6    | C5    | 1.162814E-03  | -8.982218E-04 | 4.857120E-03  |
| 7    | C6    | -9.638467E-04 | 5.275631E-03  | 8.866151E-03  |
| 8    | C7    | -4.730814E-03 | -6.001486E-04 | 1.334736E-03  |
| 9    | H3    | -2.777231E-04 | 2.306371E-05  | 2.461452E-04  |
| 10   | H4    | -1.426506E-03 | -7.724899E-04 | 5.474090E-04  |
| 11   | H6    | -1.770156E-03 | -3.865938E-04 | -9.211702E-04 |
| 12   | C16   | 9.943502E-04  | -2.424272E-03 | -7.414661E-04 |
| 13   | C8    | 3.149883E-04  | -2.131484E-03 | 3.380947E-03  |

S155

|       |       |               |               |               |
|-------|-------|---------------|---------------|---------------|
| 14    | N2    | -7.793412E-03 | -1.374417E-02 | 4.559268E-04  |
| 15    | C9    | 4.333499E-03  | 9.066313E-03  | -4.723013E-03 |
| 16    | C11   | 5.234472E-03  | 5.077006E-03  | 4.690626E-03  |
| 17    | O1    | 4.760130E-03  | 1.883641E-03  | -1.121553E-03 |
| 18    | C18   | -2.270831E-03 | 5.018101E-03  | 5.055633E-04  |
| 19    | C19   | 3.256554E-03  | 1.223243E-03  | 5.902529E-04  |
| 20    | C20   | -4.280619E-03 | 1.916285E-03  | 1.891580E-04  |
| 21    | C21   | -5.265252E-03 | -2.993652E-03 | -2.766635E-03 |
| 22    | C22   | 8.589172E-03  | -5.527471E-03 | 1.497082E-03  |
| 23    | H2    | 8.052200E-05  | 3.648249E-05  | 8.471907E-04  |
| 24    | H5    | 2.111037E-03  | 1.310376E-03  | 4.538936E-04  |
| 25    | H7    | -1.409030E-03 | 2.194106E-03  | -8.314943E-04 |
| 26    | H8    | -6.462185E-04 | -3.620992E-04 | 2.889795E-04  |
| 27    | H9    | -2.881855E-04 | 5.095360E-05  | 1.073475E-04  |
| 28    | H10   | 8.607824E-04  | -8.939108E-04 | -5.707014E-04 |
| 29    | C10   | 2.047501E-03  | -1.760007E-03 | 1.143945E-03  |
| 30    | H11   | -1.816107E-04 | -7.393073E-04 | -4.973610E-04 |
| 31    | H12   | -1.006128E-04 | -4.610591E-04 | -7.477742E-04 |
| 32    | H13   | -2.027130E-04 | 2.866088E-04  | 6.346529E-05  |
| 33    | H14   | -1.253089E-05 | 1.213578E-03  | -5.111228E-04 |
| 34    | H15   | -6.434327E-03 | 4.048267E-04  | 3.576926E-03  |
| 35    | H16   | 5.186746E-03  | 4.318448E-03  | -3.489497E-03 |
| 36    | H17   | -8.137023E-04 | -6.008042E-03 | -6.129437E-03 |
| ----- |       |               |               |               |
|       | total | 2.956614E-04  | 1.821400E-04  | -6.363694E-04 |

end of program derlb

start of program geopt 2

geometry optimization step 2

reading input hessian of dimension 108

in five columns format

Level shifts adjusted to satisfy step-size constraints

Step size: 0.3000331

Cos(theta): 0.4305863

Final level shift: -1.2795320E-02

energy change: -1.5076E-02 . ( 5.0000E-05 )

gradient maximum: 1.0864E-02 . ( 4.5000E-04 )

gradient rms: 2.9859E-03 . ( 3.0000E-04 )

step size: 0.30000 trust radius: 0.30000

displacement maximum: 1.5538E-01 . ( 1.8000E-03 )

displacement rms: 2.7161E-02 . ( 1.2000E-03 )

predicted energy change: -2.7061E-03 geom step: 3.0000E-

01 full step: 3.0000E-01

molecular structure not yet converged...



center of mass moved by:

x: 1.2165E-03 y: -1.3489E-02 z: -1.8772E-02

new geometry:

|      | angstroms     |               |               |
|------|---------------|---------------|---------------|
| atom | x             | y             | z             |
| H1   | 1.1193905048  | 1.8126267842  | -2.2034859292 |
| C1   | 1.4308984614  | 1.7248948198  | -1.1786423510 |
| C2   | 2.1967769756  | 1.4819080132  | 1.4630351635  |
| C3   | 0.5976680706  | 1.0602449623  | -0.2878106471 |
| C4   | 2.6419529465  | 2.2575457752  | -0.7762343401 |
| C5   | 3.0154115602  | 2.1337516344  | 0.5539877031  |
| C6   | 0.9912258814  | 0.9228159075  | 1.0487868998  |
| C7   | -0.7323826996 | 0.4842551694  | -0.7367323528 |
| H3   | 3.2763432977  | 2.7636317489  | -1.4812812189 |
| H4   | 3.9449226467  | 2.5529696095  | 0.8946852948  |
| H6   | 2.5015762085  | 1.4165566260  | 2.4874633974  |
| C16  | -0.6475858097 | -0.9336658601 | -1.3146481354 |
| C8   | -1.7324711129 | 0.5691443353  | 0.4365301301  |
| N2   | 0.1698490065  | 0.2165844193  | 1.9564669191  |
| C9   | -1.1501283704 | -0.0262040558 | 1.7065386369  |
| C11  | 0.7187310243  | -0.2620814101 | 3.2244322539  |
| O1   | -1.8293686969 | -0.6551586097 | 2.4622106244  |
| C18  | -0.6506913293 | -3.5337795940 | -2.3621237847 |
| C19  | -1.6775836093 | -1.3787597308 | -2.1489544407 |
| C20  | 0.3838374582  | -1.8122171827 | -1.0227490006 |
| C21  | 0.3736573294  | -3.1042118375 | -1.5371789164 |
| C22  | -1.6781965342 | -2.6608898499 | -2.6713098988 |
| H2   | -2.4888559173 | -0.7109151224 | -2.3922423575 |
| H5   | 1.2078174026  | -1.4940238389 | -0.3928714474 |
| H7   | 1.1816049054  | -3.7687343674 | -1.2896467243 |
| H8   | -2.4849779963 | -2.9810785100 | -3.3155173957 |
| H9   | -0.6519884895 | -4.5305111207 | -2.7655035004 |
| H10  | -1.1144608468 | 1.1175830201  | -1.5274628212 |
| C10  | -2.1998504032 | 2.0116918183  | 0.7130616652  |
| H11  | -1.3654845606 | 2.6683152082  | 0.9454418804  |
| H12  | -2.8947985803 | 2.0276883032  | 1.5426087712  |
| H13  | -2.7091364224 | 2.4089000751  | -0.1601924396 |
| H14  | -2.5983685191 | -0.0378972304 | 0.2219087802  |
| H15  | 1.6961747392  | -0.7060623531 | 3.0464605562  |
| H16  | 0.0381610968  | -1.0000343566 | 3.6137870212  |
| H17  | 0.8289224752  | 0.5379766839  | 3.9573493264  |

nuclear repulsion energy..... 1414.036299556 hartrees

-----  
/ end of geometry optimization iteration 2 /  
-----

end of program geopt

start of program onee

smallest eigenvalue of S: 3.408E-04  
number of canonical orbitals..... 368  
end of program onee

start of program probe  
end of program probe

start of program grid

number of gridpoints:

| atom     | H1  | C1  | C2  | C3  | C4  | C5  | C6  |
|----------|-----|-----|-----|-----|-----|-----|-----|
| C7       |     |     |     |     |     |     |     |
| grid # 1 | 72  | 85  | 89  | 90  | 89  | 88  | 85  |
| 81       |     |     |     |     |     |     |     |
| grid # 2 | 116 | 95  | 95  | 98  | 97  | 97  | 93  |
| 91       |     |     |     |     |     |     |     |
| grid # 3 | 216 | 181 | 183 | 195 | 183 | 183 | 195 |
| 172      |     |     |     |     |     |     |     |
| grid # 4 | 215 | 326 | 327 | 336 | 327 | 327 | 325 |
| 314      |     |     |     |     |     |     |     |

number of gridpoints:

| atom     | H3  | H4  | H6  | C16 | C8  | N2  | C9  |
|----------|-----|-----|-----|-----|-----|-----|-----|
| C11      |     |     |     |     |     |     |     |
| grid # 1 | 73  | 73  | 70  | 88  | 82  | 96  | 81  |
| 68       |     |     |     |     |     |     |     |
| grid # 2 | 118 | 118 | 112 | 98  | 90  | 106 | 91  |
| 79       |     |     |     |     |     |     |     |
| grid # 3 | 224 | 223 | 208 | 193 | 174 | 211 | 176 |
| 148      |     |     |     |     |     |     |     |
| grid # 4 | 224 | 223 | 208 | 339 | 311 | 387 | 293 |
| 278      |     |     |     |     |     |     |     |

number of gridpoints:

| atom     | O1  | C18 | C19 | C20 | C21 | C22 | H2  |
|----------|-----|-----|-----|-----|-----|-----|-----|
| H5       |     |     |     |     |     |     |     |
| grid # 1 | 111 | 89  | 88  | 88  | 87  | 89  | 70  |
| 72       |     |     |     |     |     |     |     |
| grid # 2 | 122 | 97  | 96  | 96  | 97  | 97  | 113 |
| 112      |     |     |     |     |     |     |     |
| grid # 3 | 258 | 183 | 183 | 182 | 184 | 184 | 213 |
| 211      |     |     |     |     |     |     |     |
| grid # 4 | 454 | 328 | 326 | 326 | 327 | 328 | 214 |
| 208      |     |     |     |     |     |     |     |

number of gridpoints:

| atom     | H7 | H8 | H9 | H10 | C10 | H11 | H12 |
|----------|----|----|----|-----|-----|-----|-----|
| H13      |    |    |    |     |     |     |     |
| grid # 1 | 73 | 73 | 73 | 68  | 71  | 72  | 71  |
| 71       |    |    |    |     |     |     |     |

```

grid # 2      118    118    118    106     79    109    110
110
grid # 3      223    222    223    204    154    216    220
217
grid # 4      223    224    224    199    289    216    218
218

```

number of gridpoints:

| atom     | H14 | H15 | H16 | H17 | total |
|----------|-----|-----|-----|-----|-------|
| grid # 1 | 69  | 71  | 70  | 71  | 2857  |
| grid # 2 | 109 | 110 | 106 | 111 | 3728  |
| grid # 3 | 212 | 214 | 212 | 217 | 7197  |
| grid # 4 | 206 | 217 | 209 | 224 | 9938  |

end of program grid

start of program rwr

end of program rwr

start of program scf

|      | i | u | d | i | g |                  | RMS     | maximum |
|------|---|---|---|---|---|------------------|---------|---------|
|      | t | p | i | c | r |                  | energy  | DIIS    |
|      | e | d | i | u | i | total energy     | density | error   |
|      | r | t | s | t | d | change           | change  |         |
| etot | 1 | N | N | 2 | U | -783.02136155277 | 2.8E-04 | 7.8E-03 |
| etot | 2 | Y | Y | 6 | M | -783.03136759458 | 1.0E-02 | 1.8E-03 |
| etot | 3 | N | Y | 2 | U | -783.03248252720 | 1.1E-03 | 5.2E-04 |
| etot | 4 | Y | Y | 6 | M | -783.03256116563 | 7.9E-05 | 2.4E-04 |
| etot | 5 | Y | Y | 6 | M | -783.03258090874 | 2.0E-05 | 9.1E-05 |
| etot | 6 | Y | Y | 6 | M | -783.03258545250 | 4.5E-06 | 6.2E-05 |
| etot | 7 | Y | N | 6 | M | -783.03258773896 | 2.3E-06 | 0.0E+00 |

Energy components, in hartrees:

|     |                               |                   |       |
|-----|-------------------------------|-------------------|-------|
| (A) | Nuclear repulsion.....        | 1414.03629955572  |       |
| (E) | Total one-electron terms..... | -3872.60797626611 |       |
| (I) | Total two-electron terms..... | 1675.53908897143  |       |
| (L) | Electronic energy.....        | -2197.06888729467 | (E+I) |
| (N) | Total energy.....             | -783.03258773896  | (A+L) |

SCFE: SCF energy: HF -783.03258773896 hartrees iterations:  
7

HOMO energy: -0.30321  
LUMO energy: 0.13156

Orbital energies:

|           |           |           |           |           |           |
|-----------|-----------|-----------|-----------|-----------|-----------|
| -20.52271 | -15.60097 | -11.34219 | -11.28805 | -11.25738 | -11.24922 |
| -11.24267 | -11.24059 | -11.24054 | -11.23997 | -11.23928 | -11.23613 |
| -11.23143 | -11.23091 | -11.22963 | -11.22928 | -11.22762 | -11.22696 |
| -11.22393 | -1.39739  | -1.26887  | -1.16423  | -1.14847  | -1.10634  |
| -1.03172  | -1.02031  | -1.01666  | -1.01040  | -0.95996  | -0.93278  |
| -0.85756  | -0.84834  | -0.83317  | -0.82069  | -0.79468  | -0.74185  |
| -0.70968  | -0.69922  | -0.66980  | -0.65048  | -0.64746  | -0.63565  |
| -0.62992  | -0.61550  | -0.61026  | -0.60090  | -0.59601  | -0.58197  |
| -0.57938  | -0.56460  | -0.55046  | -0.54455  | -0.53594  | -0.52365  |
| -0.51980  | -0.50645  | -0.49936  | -0.49482  | -0.48499  | -0.46893  |
| -0.46460  | -0.42130  | -0.40760  | -0.34172  | -0.33094  | -0.32285  |
| -0.30321  | 0.13156   | 0.13367   | 0.14474   | 0.14973   | 0.21032   |
| 0.23174   | 0.23805   | 0.24631   | 0.26000   | 0.28816   |           |

end of program scf

start of program derla  
end of program derla

start of program rwr  
end of program rwr

start of program der1b

forces (hartrees/bohr) : total

| atom | label | x             | y             | z             |
|------|-------|---------------|---------------|---------------|
| 1    | H1    | -3.911478E-04 | 3.542709E-04  | -1.458379E-03 |
| 2    | C1    | -3.119551E-03 | -2.225066E-03 | 3.531209E-03  |
| 3    | C2    | 6.108036E-04  | -1.335699E-04 | -2.602108E-03 |
| 4    | C3    | 9.008492E-04  | -1.172471E-03 | -5.213856E-04 |
| 5    | C4    | 1.225817E-03  | -3.332497E-04 | 4.683335E-03  |
| 6    | C5    | -1.170997E-03 | 5.146213E-04  | -2.301552E-03 |
| 7    | C6    | -2.109809E-03 | 2.064048E-03  | -2.254050E-03 |
| 8    | C7    | 1.202640E-03  | -1.462120E-03 | 1.593030E-03  |
| 9    | H3    | 1.815989E-04  | 1.813854E-05  | 1.797177E-04  |
| 10   | H4    | 5.309109E-04  | 2.040217E-04  | 2.340563E-04  |
| 11   | H6    | 5.591363E-04  | -3.274693E-04 | 1.369180E-03  |
| 12   | C16   | -3.956222E-03 | 8.520568E-04  | -3.772113E-04 |
| 13   | C8    | 2.454950E-03  | 1.921568E-03  | -3.590774E-04 |
| 14   | N2    | 8.641515E-03  | 3.070433E-03  | 3.945689E-03  |
| 15   | C9    | -1.581657E-03 | 1.060236E-03  | -7.351345E-03 |
| 16   | C11   | 3.887874E-03  | 3.595520E-04  | -2.895027E-03 |
| 17   | O1    | -7.229827E-03 | -2.666916E-03 | 6.016554E-03  |
| 18   | C18   | 2.917910E-03  | -4.248849E-04 | 1.383904E-03  |
| 19   | C19   | 1.005349E-03  | 1.404747E-03  | 6.905326E-04  |
| 20   | C20   | 4.465907E-03  | -7.307126E-04 | 3.099259E-03  |
| 21   | C21   | 2.671215E-03  | 6.395676E-04  | 7.848725E-04  |

|       |       |               |               |               |
|-------|-------|---------------|---------------|---------------|
| 22    | C22   | -5.426351E-03 | 3.024308E-03  | -1.345252E-03 |
| 23    | H2    | 7.483926E-04  | -1.820965E-04 | 1.225187E-04  |
| 24    | H5    | -5.866640E-03 | -2.954842E-03 | -4.533655E-03 |
| 25    | H7    | 4.726412E-04  | -1.123519E-03 | -2.027003E-04 |
| 26    | H8    | 2.496669E-03  | 1.700077E-03  | 2.002181E-03  |
| 27    | H9    | 9.659810E-04  | -5.886098E-04 | 5.900492E-04  |
| 28    | H10   | -8.084433E-04 | 1.599311E-03  | -1.592116E-03 |
| 29    | C10   | 2.653684E-03  | -1.534465E-03 | -1.567911E-03 |
| 30    | H11   | -1.646321E-03 | -7.872101E-04 | -3.019026E-04 |
| 31    | H12   | -5.418789E-04 | -6.126750E-05 | 1.355192E-03  |
| 32    | H13   | 4.762809E-04  | -1.678403E-04 | 1.839367E-04  |
| 33    | H14   | -1.738107E-03 | -7.635143E-04 | -6.480034E-04 |
| 34    | H15   | -3.793343E-03 | 3.010100E-04  | 1.341307E-03  |
| 35    | H16   | 1.814264E-03  | -8.796190E-05 | 4.732089E-04  |
| 36    | H17   | -1.445406E-03 | -1.080757E-03 | -3.829907E-03 |
| ----- |       | -----         | -----         | -----         |
|       | total | 5.868559E-05  | 2.794237E-04  | -5.618487E-04 |

end of program der1b

start of program geopt 3

geometry optimization step 3

reading input hessian of dimension 108  
in five columns format

reading input hessian of dimension 108  
in five columns format

energy change: -1.3599E-03 . ( 5.0000E-05 )  
 gradient maximum: 9.3336E-03 . ( 4.5000E-04 )  
 gradient rms: 2.3259E-03 . ( 3.0000E-04 )  
 step size: 0.28372 trust radius: 0.30000  
 displacement maximum: 1.1809E-01 . ( 1.8000E-03 )  
 displacement rms: 2.5687E-02 . ( 1.2000E-03 )  
 predicted energy change: -1.3001E-03 geom step: 2.8372E-01  
 01 full step: 2.8372E-01  
 molecular structure not yet converged...

center of mass moved by:

x: -7.2246E-03 y: 2.3951E-02 z: 1.5525E-02

new geometry:

|      | angstroms    |              |               |
|------|--------------|--------------|---------------|
| atom | x            | y            | z             |
| H1   | 1.0511254407 | 1.8828349434 | -2.2098008415 |
| C1   | 1.3844660508 | 1.7631921226 | -1.1932136842 |
| C2   | 2.2137248961 | 1.4247722195 | 1.4189406178  |
| C3   | 0.5738065089 | 1.0731536158 | -0.3052785512 |
| C4   | 2.6050670365 | 2.2794606197 | -0.7996036799 |
| C5   | 3.0133828284 | 2.1036429665 | 0.5137247867  |

|     |               |               |               |
|-----|---------------|---------------|---------------|
| C6  | 0.9920081704  | 0.9020907964  | 1.0196384971  |
| C7  | -0.7570698752 | 0.4875136275  | -0.7342452600 |
| H3  | 3.2234621656  | 2.8109208711  | -1.5013044160 |
| H4  | 3.9542698025  | 2.4999681140  | 0.8467527790  |
| H6  | 2.5454886850  | 1.3084361207  | 2.4313952270  |
| C16 | -0.6553964375 | -0.9362424062 | -1.2872359414 |
| C8  | -1.7459533021 | 0.5813579391  | 0.4434427077  |
| N2  | 0.1869515156  | 0.1782100299  | 1.9266293327  |
| C9  | -1.1613140564 | 0.0178953184  | 1.7195581261  |
| C11 | 0.7654927316  | -0.3712528435 | 3.1292554921  |
| O1  | -1.8650251785 | -0.5122746065 | 2.5311817588  |
| C18 | -0.5948449715 | -3.5386568700 | -2.3177086890 |
| C19 | -1.6235278809 | -1.3710197421 | -2.1967843737 |
| C20 | 0.3338078044  | -1.8299689378 | -0.9076806346 |
| C21 | 0.3655501308  | -3.1205758693 | -1.4154162473 |
| C22 | -1.5923512076 | -2.6553954013 | -2.7112899451 |
| H2  | -2.4050327749 | -0.6903282694 | -2.5060218772 |
| H5  | 1.0861203443  | -1.5310041441 | -0.2174182961 |
| H7  | 1.1504935859  | -3.7966165663 | -1.1031859835 |
| H8  | -2.3355289943 | -2.9564896780 | -3.4207419947 |
| H9  | -0.5610855132 | -4.5373847305 | -2.7111691858 |
| H10 | -1.1466239082 | 1.1075018083  | -1.5363412097 |
| C10 | -2.2198012817 | 2.0168648722  | 0.7022394019  |
| H11 | -1.3952674756 | 2.6807594931  | 0.9306597319  |
| H12 | -2.9210176122 | 2.0378742470  | 1.5288404672  |
| H13 | -2.7256179734 | 2.4030801686  | -0.1758784417 |
| H14 | -2.6104846130 | -0.0339342616 | 0.2396894472  |
| H15 | 1.6672568851  | -0.8988039536 | 2.8780089012  |
| H16 | 0.0580314161  | -1.0633791257 | 3.5643932036  |
| H17 | 0.9916607888  | 0.4003749077  | 3.8403786522  |

nuclear repulsion energy..... 1417.356122328 hartrees

-----  
 / end of geometry optimization iteration 3 /  
 -----

end of program geopt

start of program onee  
 smallest eigenvalue of S: 3.362E-04  
 number of canonical orbitals..... 368  
 end of program onee

start of program probe  
 end of program probe

start of program grid

number of gridpoints:

| atom     | H1  | C1  | C2  | C3  | C4  | C5  | C6  |
|----------|-----|-----|-----|-----|-----|-----|-----|
| C7       |     |     |     |     |     |     |     |
| grid # 1 | 72  | 85  | 88  | 88  | 89  | 87  | 85  |
| 81       |     |     |     |     |     |     |     |
| grid # 2 | 116 | 95  | 95  | 98  | 97  | 97  | 93  |
| 91       |     |     |     |     |     |     |     |
| grid # 3 | 216 | 182 | 183 | 195 | 183 | 183 | 191 |
| 173      |     |     |     |     |     |     |     |
| grid # 4 | 215 | 326 | 326 | 336 | 326 | 327 | 323 |
| 314      |     |     |     |     |     |     |     |

number of gridpoints:

| atom     | H3  | H4  | H6  | C16 | C8  | N2  | C9  |
|----------|-----|-----|-----|-----|-----|-----|-----|
| C11      |     |     |     |     |     |     |     |
| grid # 1 | 73  | 73  | 71  | 88  | 81  | 96  | 81  |
| 70       |     |     |     |     |     |     |     |
| grid # 2 | 118 | 118 | 111 | 98  | 90  | 106 | 90  |
| 79       |     |     |     |     |     |     |     |
| grid # 3 | 224 | 223 | 207 | 193 | 174 | 209 | 176 |
| 141      |     |     |     |     |     |     |     |
| grid # 4 | 224 | 223 | 207 | 340 | 310 | 391 | 291 |
| 271      |     |     |     |     |     |     |     |

number of gridpoints:

| atom     | O1  | C18 | C19 | C20 | C21 | C22 | H2  |
|----------|-----|-----|-----|-----|-----|-----|-----|
| H5       |     |     |     |     |     |     |     |
| grid # 1 | 111 | 89  | 88  | 87  | 89  | 89  | 70  |
| 71       |     |     |     |     |     |     |     |
| grid # 2 | 122 | 97  | 96  | 96  | 97  | 97  | 113 |
| 111      |     |     |     |     |     |     |     |
| grid # 3 | 260 | 184 | 182 | 182 | 184 | 185 | 214 |
| 210      |     |     |     |     |     |     |     |
| grid # 4 | 454 | 329 | 327 | 326 | 327 | 329 | 214 |
| 207      |     |     |     |     |     |     |     |

number of gridpoints:

| atom     | H7  | H8  | H9  | H10 | C10 | H11 | H12 |
|----------|-----|-----|-----|-----|-----|-----|-----|
| H13      |     |     |     |     |     |     |     |
| grid # 1 | 73  | 73  | 73  | 68  | 73  | 72  | 71  |
| 71       |     |     |     |     |     |     |     |
| grid # 2 | 118 | 118 | 118 | 105 | 80  | 107 | 109 |
| 110      |     |     |     |     |     |     |     |
| grid # 3 | 223 | 223 | 223 | 202 | 148 | 218 | 219 |
| 217      |     |     |     |     |     |     |     |
| grid # 4 | 223 | 223 | 224 | 199 | 287 | 215 | 220 |
| 219      |     |     |     |     |     |     |     |

number of gridpoints:

| atom     | H14 | H15 | H16 | H17 | total |
|----------|-----|-----|-----|-----|-------|
| grid # 1 | 68  | 71  | 70  | 71  | 2856  |
| grid # 2 | 109 | 109 | 108 | 111 | 3723  |
| grid # 3 | 214 | 215 | 212 | 216 | 7184  |

grid # 4            207        210        209        213        9912

end of program grid

start of program rwr  
end of program rwr

start of program scf

|      | i | u | d | i | g |                   | RMS     | maximum |
|------|---|---|---|---|---|-------------------|---------|---------|
|      | t | p | i | c | r |                   | density | DIIS    |
|      | e | d | i | u | i | energy            | change  | error   |
|      | r | t | s | t | d | total energy      | change  | error   |
| etot | 1 | N | N | 2 | U | -783.00228408865  |         | 1.7E-02 |
| etot | 2 | Y | Y | 6 | M | -783.028744444396 | 2.6E-02 | 7.0E-03 |
| etot | 3 | N | Y | 2 | U | -783.03227748154  | 3.5E-03 | 1.7E-03 |
| etot | 4 | Y | Y | 6 | M | -783.03246002276  | 1.8E-04 | 6.5E-04 |
| etot | 5 | Y | Y | 6 | M | -783.03250696626  | 4.7E-05 | 1.7E-04 |
| etot | 6 | Y | Y | 6 | M | -783.03250893662  | 2.0E-06 | 4.7E-05 |
| etot | 7 | Y | N | 6 | M | -783.03251144614  | 2.5E-06 | 0.0E+00 |

Energy components, in hartrees:

|     |                               |                   |       |
|-----|-------------------------------|-------------------|-------|
| (A) | Nuclear repulsion.....        | 1417.35612232773  |       |
| (E) | Total one-electron terms..... | -3879.18383643504 |       |
| (I) | Total two-electron terms..... | 1678.79520266117  |       |
| (L) | Electronic energy.....        | -2200.38863377386 | (E+I) |
| (N) | Total energy.....             | -783.03251144614  | (A+L) |

SCFE: SCF energy: HF        -783.03251144614 hartrees        iterations:  
7

HOMO energy:        -0.30304  
LUMO energy:        0.13163

Orbital energies:

|           |           |           |           |           |           |
|-----------|-----------|-----------|-----------|-----------|-----------|
| -20.52323 | -15.60007 | -11.34354 | -11.28636 | -11.25311 | -11.24882 |
| -11.24231 | -11.24039 | -11.23995 | -11.23977 | -11.23915 | -11.23544 |
| -11.23151 | -11.23120 | -11.23021 | -11.22992 | -11.22786 | -11.22521 |
| -11.22254 | -1.39584  | -1.27111  | -1.16547  | -1.14922  | -1.10810  |
| -1.03304  | -1.02111  | -1.01747  | -1.01184  | -0.96268  | -0.93323  |
| -0.85859  | -0.84777  | -0.83477  | -0.82009  | -0.79649  | -0.74235  |
| -0.71159  | -0.70109  | -0.67092  | -0.65160  | -0.64888  | -0.63666  |
| -0.63338  | -0.61565  | -0.61139  | -0.60290  | -0.59761  | -0.58403  |
| -0.58100  | -0.56501  | -0.54888  | -0.54480  | -0.53530  | -0.52420  |
| -0.52070  | -0.50674  | -0.49825  | -0.49699  | -0.48529  | -0.47024  |
| -0.46449  | -0.42026  | -0.40868  | -0.34208  | -0.33226  | -0.32309  |
| -0.30304  | 0.13163   | 0.13538   | 0.14326   | 0.14990   | 0.20792   |



0.23153 0.23816 0.24334 0.25969 0.28849

end of program scf

start of program derla  
end of program derla

start of program rwr  
end of program rwr

start of program derlb

forces (hartrees/bohr) : total

| atom | label | x             | y             | z             |
|------|-------|---------------|---------------|---------------|
| 1    | H1    | 3.799907E-05  | 2.062855E-04  | -1.247186E-04 |
| 2    | C1    | -3.320137E-03 | -1.950448E-03 | 1.416294E-03  |
| 3    | C2    | 2.083693E-03  | 9.075049E-04  | -3.035847E-04 |
| 4    | C3    | -1.030277E-03 | -1.681619E-03 | 1.459372E-03  |
| 5    | C4    | 3.033151E-03  | 7.064342E-04  | 4.143072E-03  |
| 6    | C5    | -1.081896E-03 | 6.804474E-04  | -2.681428E-03 |
| 7    | C6    | -1.093058E-03 | -9.825934E-04 | -3.817772E-03 |
| 8    | C7    | 2.456655E-03  | 5.204630E-04  | -3.528671E-04 |
| 9    | H3    | 2.131225E-05  | -3.678057E-04 | 4.942864E-04  |
| 10   | H4    | 1.434530E-03  | 6.684642E-04  | -7.152819E-06 |
| 11   | H6    | 9.000633E-04  | 3.967989E-04  | 5.066154E-04  |
| 12   | C16   | -5.094192E-03 | -3.741490E-04 | -2.257058E-03 |
| 13   | C8    | 1.887811E-03  | 9.008849E-04  | -3.067275E-03 |
| 14   | N2    | -6.813761E-03 | 3.565887E-03  | -1.100561E-02 |
| 15   | C9    | 1.065183E-03  | -6.345649E-04 | 3.107854E-03  |
| 16   | C11   | -4.787900E-03 | -6.917445E-03 | 1.942500E-03  |
| 17   | O1    | -1.738129E-03 | -2.271998E-03 | 1.886762E-03  |
| 18   | C18   | -1.365493E-04 | 1.026462E-03  | -2.337893E-04 |
| 19   | C19   | 1.563066E-03  | 2.162486E-03  | 1.193534E-03  |
| 20   | C20   | -2.794822E-03 | -2.288840E-03 | -2.668097E-03 |
| 21   | C21   | 1.773944E-03  | -2.261093E-03 | 6.512729E-04  |
| 22   | C22   | 3.106803E-03  | 2.025543E-03  | 2.900126E-03  |
| 23   | H2    | 2.224789E-03  | -2.038599E-03 | 3.295646E-04  |
| 24   | H5    | 5.982254E-03  | 2.695950E-03  | 4.409923E-03  |
| 25   | H7    | -3.332877E-03 | 2.559779E-03  | -1.225273E-03 |
| 26   | H8    | -2.893769E-03 | -2.175187E-03 | -2.232603E-03 |
| 27   | H9    | -8.705405E-04 | -1.086142E-03 | -1.197889E-03 |
| 28   | H10   | -4.367709E-04 | -2.823101E-04 | 2.448018E-04  |
| 29   | C10   | -2.118518E-03 | 8.937653E-04  | -1.680658E-04 |
| 30   | H11   | 8.753990E-04  | 7.137019E-04  | 4.823823E-04  |
| 31   | H12   | 5.533371E-04  | -1.694544E-04 | 3.171498E-04  |
| 32   | H13   | -2.950149E-04 | 3.314720E-04  | -7.947972E-04 |
| 33   | H14   | -1.089318E-03 | -6.201773E-04 | -3.886202E-05 |

|       |       |              |               |               |
|-------|-------|--------------|---------------|---------------|
| 34    | H15   | 6.611949E-03 | -2.922418E-03 | -2.085480E-04 |
| 35    | H16   | 1.849884E-03 | 3.197009E-03  | -9.394257E-04 |
| 36    | H17   | 1.556327E-03 | 4.847232E-03  | 7.214890E-03  |
| ----- |       | -----        | -----         | -----         |
|       | total | 9.062102E-05 | -1.827433E-05 | -6.244174E-04 |

end of program der1b

start of program geopt 4

geometry optimization step 4

reading input hessian of dimension 108

in five columns format

reading input hessian of dimension 108

in five columns format

energy change: 7.6293E-05 . ( 5.0000E-05 )  
 gradient maximum: 9.5257E-03 . ( 4.5000E-04 )  
 gradient rms: 2.2442E-03 . ( 3.0000E-04 )  
 step size: 0.22589 trust radius: 0.30000  
 displacement maximum: 1.0732E-01 . ( 1.8000E-03 )  
 displacement rms: 2.0451E-02 . ( 1.2000E-03 )  
 predicted energy change: -1.2400E-03 geom step: 2.2589E-  
 01 full step: 2.2589E-01  
 molecular structure not yet converged...

center of mass moved by:

x: 4.7253E-03 y: -1.3031E-02 z: -3.8420E-03

new geometry:

|      | angstroms     |               |               |
|------|---------------|---------------|---------------|
| atom | x             | y             | z             |
| H1   | 1.1070761932  | 1.8195912004  | -2.1928138719 |
| C1   | 1.4238055531  | 1.7115423857  | -1.1689072985 |
| C2   | 2.2179900560  | 1.4298878489  | 1.4483086976  |
| C3   | 0.5963967495  | 1.0388146203  | -0.2862416860 |
| C4   | 2.6439847882  | 2.2340655543  | -0.7692641334 |
| C5   | 3.0334604556  | 2.0925404637  | 0.5460040737  |
| C6   | 1.0005569035  | 0.8914388882  | 1.0389890000  |
| C7   | -0.7330888612 | 0.4697780703  | -0.7281360597 |
| H3   | 3.2736304250  | 2.7431286672  | -1.4749213734 |
| H4   | 3.9698894617  | 2.4995482716  | 0.8837732226  |
| H6   | 2.5329351778  | 1.3454949364  | 2.4691775887  |
| C16  | -0.6509831458 | -0.9437287435 | -1.3074353378 |
| C8   | -1.7340820203 | 0.5620418060  | 0.4385538909  |
| N2   | 0.1831993774  | 0.1829813818  | 1.9410863700  |
| C9   | -1.1706573086 | 0.0149245987  | 1.7363819785  |
| C11  | 0.7293794351  | -0.2600616229 | 3.2236861937  |
| O1   | -1.8961604406 | -0.4920974558 | 2.5579678016  |
| C18  | -0.6272482538 | -3.5198607600 | -2.3953228780 |

|     |               |               |               |
|-----|---------------|---------------|---------------|
| C19 | -1.6757406427 | -1.3852506179 | -2.1286067421 |
| C20 | 0.3948170759  | -1.8107905017 | -1.0533461416 |
| C21 | 0.4071169525  | -3.0892169264 | -1.5911539213 |
| C22 | -1.6725588532 | -2.6587689934 | -2.6640555997 |
| H2  | -2.4844533180 | -0.7232233195 | -2.3523000849 |
| H5  | 1.2132888071  | -1.4923495256 | -0.4441174759 |
| H7  | 1.2204982509  | -3.7472755682 | -1.3779370649 |
| H8  | -2.4817072260 | -2.9815793727 | -3.2883483445 |
| H9  | -0.6208173945 | -4.5118840736 | -2.8103227851 |
| H10 | -1.1136174370 | 1.1057319473  | -1.5210713933 |
| C10 | -2.2309615982 | 1.9935644890  | 0.6785656082  |
| H11 | -1.4186286112 | 2.6742911328  | 0.8898375564  |
| H12 | -2.9214182763 | 2.0170643556  | 1.5141575279  |
| H13 | -2.7489909940 | 2.3539788593  | -0.2011381038 |
| H14 | -2.5900691670 | -0.0656402959 | 0.2362944114  |
| H15 | 1.7087391925  | -0.6794418568 | 3.0764174867  |
| H16 | 0.0789870911  | -1.0063698160 | 3.6284353537  |
| H17 | 0.7916365960  | 0.5519518166  | 3.9354038077  |

nuclear repulsion energy..... 1414.177259349 hartrees

-----  
/ end of geometry optimization iteration 4 /  
-----

end of program geopt

start of program onee  
smallest eigenvalue of S: 3.316E-04  
number of canonical orbitals..... 368  
end of program onee

start of program probe  
end of program probe

start of program grid

number of gridpoints:

| atom     | H1  | C1  | C2  | C3  | C4  | C5  | C6  |
|----------|-----|-----|-----|-----|-----|-----|-----|
| C7       |     |     |     |     |     |     |     |
| grid # 1 | 72  | 85  | 89  | 90  | 89  | 87  | 84  |
| 81       |     |     |     |     |     |     |     |
| grid # 2 | 116 | 95  | 95  | 98  | 97  | 97  | 95  |
| 90       |     |     |     |     |     |     |     |
| grid # 3 | 215 | 183 | 184 | 195 | 182 | 182 | 185 |
| 171      |     |     |     |     |     |     |     |
| grid # 4 | 215 | 326 | 327 | 338 | 326 | 326 | 321 |
| 314      |     |     |     |     |     |     |     |

number of gridpoints:

| atom     | H3  | H4  | H6  | C16 | C8  | N2  | C9  |
|----------|-----|-----|-----|-----|-----|-----|-----|
| C11      |     |     |     |     |     |     |     |
| grid # 1 | 73  | 73  | 70  | 92  | 82  | 96  | 81  |
| 71       |     |     |     |     |     |     |     |
| grid # 2 | 118 | 118 | 111 | 100 | 90  | 104 | 90  |
| 79       |     |     |     |     |     |     |     |
| grid # 3 | 223 | 223 | 207 | 197 | 174 | 214 | 176 |
| 142      |     |     |     |     |     |     |     |
| grid # 4 | 224 | 223 | 206 | 340 | 313 | 389 | 297 |
| 270      |     |     |     |     |     |     |     |

number of gridpoints:

| atom     | O1  | C18 | C19 | C20 | C21 | C22 | H2  |
|----------|-----|-----|-----|-----|-----|-----|-----|
| H5       |     |     |     |     |     |     |     |
| grid # 1 | 111 | 89  | 86  | 88  | 89  | 89  | 70  |
| 72       |     |     |     |     |     |     |     |
| grid # 2 | 122 | 97  | 96  | 95  | 97  | 97  | 113 |
| 112      |     |     |     |     |     |     |     |
| grid # 3 | 261 | 183 | 182 | 182 | 184 | 184 | 213 |
| 211      |     |     |     |     |     |     |     |
| grid # 4 | 454 | 328 | 326 | 326 | 328 | 328 | 212 |
| 209      |     |     |     |     |     |     |     |

number of gridpoints:

| atom     | H7  | H8  | H9  | H10 | C10 | H11 | H12 |
|----------|-----|-----|-----|-----|-----|-----|-----|
| H13      |     |     |     |     |     |     |     |
| grid # 1 | 73  | 73  | 73  | 68  | 72  | 72  | 71  |
| 70       |     |     |     |     |     |     |     |
| grid # 2 | 118 | 118 | 118 | 106 | 79  | 109 | 111 |
| 109      |     |     |     |     |     |     |     |
| grid # 3 | 222 | 222 | 222 | 205 | 152 | 218 | 219 |
| 216      |     |     |     |     |     |     |     |
| grid # 4 | 223 | 224 | 224 | 199 | 288 | 214 | 219 |
| 214      |     |     |     |     |     |     |     |

number of gridpoints:

| atom     | H14 | H15 | H16 | H17 | total |
|----------|-----|-----|-----|-----|-------|
| grid # 1 | 68  | 71  | 70  | 71  | 2861  |
| grid # 2 | 109 | 111 | 107 | 109 | 3726  |
| grid # 3 | 211 | 213 | 212 | 217 | 7182  |
| grid # 4 | 206 | 210 | 209 | 215 | 9911  |

end of program grid

start of program rwr  
end of program rwr

start of program scf

i u d i g

|      | t | p | i | c | r |                  | RMS     | maximum |
|------|---|---|---|---|---|------------------|---------|---------|
|      | e | d | i | u | i | energy           | density | DIIS    |
|      | r | t | s | t | d | total energy     | change  | error   |
| etot | 1 | N | N | 2 | U | -783.00096356699 |         | 2.0E-02 |
| etot | 2 | Y | Y | 6 | M | -783.02839546248 | 2.7E-02 | 8.2E-03 |
| etot | 3 | N | Y | 2 | U | -783.03220148867 | 3.8E-03 | 2.0E-03 |
| etot | 4 | Y | Y | 6 | M | -783.03242887817 | 2.3E-04 | 7.3E-04 |
| etot | 5 | Y | Y | 6 | M | -783.03247141414 | 4.3E-05 | 1.9E-04 |
| etot | 6 | Y | Y | 6 | M | -783.03247578211 | 4.4E-06 | 5.9E-05 |
| etot | 7 | Y | N | 6 | M | -783.03247707189 | 1.3E-06 | 0.0E+00 |

Energy components, in hartrees:

|     |                               |                   |       |
|-----|-------------------------------|-------------------|-------|
| (A) | Nuclear repulsion.....        | 1414.17725934859  |       |
| (E) | Total one-electron terms..... | -3872.82251182247 |       |
| (I) | Total two-electron terms..... | 1675.61277540199  |       |
| (L) | Electronic energy.....        | -2197.20973642048 | (E+I) |
| (N) | Total energy.....             | -783.03247707189  | (A+L) |

SCFE: SCF energy: HF -783.03247707189 hartrees iterations:  
7

HOMO energy: -0.30343  
LUMO energy: 0.13243

Orbital energies:

|           |           |           |           |           |           |
|-----------|-----------|-----------|-----------|-----------|-----------|
| -20.52554 | -15.60269 | -11.34683 | -11.28722 | -11.25507 | -11.24863 |
| -11.24107 | -11.24013 | -11.23966 | -11.23905 | -11.23793 | -11.23562 |
| -11.23035 | -11.22885 | -11.22766 | -11.22640 | -11.22580 | -11.22456 |
| -11.22231 | -1.38939  | -1.26900  | -1.16701  | -1.15058  | -1.10859  |
| -1.03455  | -1.02025  | -1.01929  | -1.01222  | -0.96190  | -0.93434  |
| -0.85925  | -0.84853  | -0.83525  | -0.82265  | -0.79692  | -0.74177  |
| -0.71127  | -0.70241  | -0.67046  | -0.65052  | -0.64838  | -0.63655  |
| -0.63148  | -0.61567  | -0.61065  | -0.60278  | -0.59670  | -0.58363  |
| -0.58136  | -0.56572  | -0.55113  | -0.54555  | -0.53632  | -0.52323  |
| -0.52072  | -0.50782  | -0.49768  | -0.49655  | -0.48575  | -0.47028  |
| -0.46532  | -0.42237  | -0.40970  | -0.34234  | -0.33157  | -0.32429  |
| -0.30343  | 0.13243   | 0.13469   | 0.14524   | 0.15023   | 0.20529   |
| 0.23251   | 0.23833   | 0.24824   | 0.26118   | 0.28966   |           |

end of program scf

start of program derla  
end of program derla

start of program rwr  
end of program rwr

start of program der1b

forces (hartrees/bohr) : total

| atom  | label | x             | y             | z             |
|-------|-------|---------------|---------------|---------------|
| 1     | H1    | 1.187004E-04  | -7.515965E-05 | 2.063525E-04  |
| 2     | C1    | 4.014296E-04  | 8.481615E-04  | -1.460523E-03 |
| 3     | C2    | -7.614403E-04 | -1.655459E-04 | 1.171509E-03  |
| 4     | C3    | 6.178823E-04  | 1.301631E-03  | -2.779853E-03 |
| 5     | C4    | -1.456725E-03 | 6.135702E-05  | -3.095792E-03 |
| 6     | C5    | -2.698911E-04 | -8.775386E-04 | 2.298492E-03  |
| 7     | C6    | 2.002173E-03  | 4.890475E-04  | 1.158658E-03  |
| 8     | C7    | -9.801192E-05 | -1.981019E-04 | -2.117659E-04 |
| 9     | H3    | 1.989689E-04  | 6.030181E-04  | -7.282828E-04 |
| 10    | H4    | 1.835565E-04  | -1.063414E-06 | 1.301840E-04  |
| 11    | H6    | 1.047992E-04  | -1.728119E-04 | 5.922276E-04  |
| 12    | C16   | 1.925531E-03  | 3.844211E-03  | 1.666660E-03  |
| 13    | C8    | -4.154271E-04 | -2.392776E-03 | 1.029371E-03  |
| 14    | N2    | -7.082891E-03 | -4.535679E-03 | 9.482218E-03  |
| 15    | C9    | -2.602550E-03 | -2.163163E-03 | 7.533282E-03  |
| 16    | C11   | -3.542308E-03 | 3.136769E-03  | -4.975745E-03 |
| 17    | O1    | 1.338142E-02  | 5.990080E-03  | -1.004035E-02 |
| 18    | C18   | 1.079159E-03  | -3.459922E-03 | -4.940240E-04 |
| 19    | C19   | -2.735162E-03 | -2.594389E-03 | -2.087062E-03 |
| 20    | C20   | 3.343149E-03  | -3.144038E-03 | 8.572842E-04  |
| 21    | C21   | -1.315762E-03 | 2.256393E-03  | 1.011987E-03  |
| 22    | C22   | -2.614262E-03 | 1.724963E-03  | -7.381189E-04 |
| 23    | H2    | -5.826829E-03 | 3.511676E-03  | -1.710841E-03 |
| 24    | H5    | 3.359092E-03  | 5.321039E-04  | 2.670099E-03  |
| 25    | H7    | 5.580438E-03  | -3.052526E-03 | 1.640127E-03  |
| 26    | H8    | -2.796019E-03 | 1.579354E-04  | -2.238583E-03 |
| 27    | H9    | 3.221615E-04  | -3.862745E-04 | -5.039925E-05 |
| 28    | H10   | -2.254654E-04 | 2.770558E-04  | -4.822937E-04 |
| 29    | C10   | -1.950680E-03 | -6.889848E-04 | 1.301045E-03  |
| 30    | H11   | 2.580893E-03  | 1.722095E-03  | 4.536402E-04  |
| 31    | H12   | -1.225009E-05 | -3.370148E-04 | -3.233219E-04 |
| 32    | H13   | -1.100025E-03 | 8.970211E-04  | -1.533985E-03 |
| 33    | H14   | -1.297947E-03 | -8.756878E-05 | -1.209862E-03 |
| 34    | H15   | 4.152684E-03  | -1.818351E-03 | -1.256293E-03 |
| 35    | H16   | -3.889406E-03 | -4.065049E-03 | 9.489436E-04  |
| 36    | H17   | 8.271764E-04  | 3.214817E-03  | 9.312493E-04  |
| total |       | 1.861618E-04  | 3.523792E-04  | -3.337671E-04 |

end of program der1b

start of program geopt 5

geometry optimization step 5

reading input hessian of dimension 108  
in five columns format  
reading input hessian of dimension 108  
in five columns format

energy change: 3.4374E-05 \* ( 5.0000E-05 )  
gradient maximum: 1.7372E-02 . ( 4.5000E-04 )  
gradient rms: 3.0866E-03 . ( 3.0000E-04 )  
step size: 0.16544 trust radius: 0.30000  
displacement maximum: 7.0718E-02 . ( 1.8000E-03 )  
displacement rms: 1.4979E-02 . ( 1.2000E-03 )  
predicted energy change: -1.1825E-03 geom step: 1.6544E-  
01 full step: 1.6544E-01  
molecular structure not yet converged...

center of mass moved by:  
x: -2.5403E-03 y: -9.8162E-04 z: -2.6062E-03

new geometry:

|      | angstroms     |               |               |
|------|---------------|---------------|---------------|
| atom | x             | y             | z             |
| H1   | 1.0987118325  | 1.8395543573  | -2.1999368286 |
| C1   | 1.4141836402  | 1.7325800786  | -1.1747410342 |
| C2   | 2.2079474432  | 1.4464795417  | 1.4483511136  |
| C3   | 0.5887749833  | 1.0554537280  | -0.2923175807 |
| C4   | 2.6314949866  | 2.2594703294  | -0.7720332069 |
| C5   | 3.0216143057  | 2.1122077268  | 0.5448147951  |
| C6   | 0.9900706883  | 0.9105241030  | 1.0367872361  |
| C7   | -0.7373084835 | 0.4795189495  | -0.7365492130 |
| H3   | 3.2593111208  | 2.7768224263  | -1.4760871088 |
| H4   | 3.9606445517  | 2.5173810426  | 0.8824559192  |
| H6   | 2.5270320159  | 1.3539817038  | 2.4700544709  |
| C16  | -0.6516175590 | -0.9398224740 | -1.2982696610 |
| C8   | -1.7407710715 | 0.5735214205  | 0.4283994225  |
| N2   | 0.1699923855  | 0.2018941276  | 1.9461828094  |
| C9   | -1.1678891560 | -0.0025522642 | 1.7109287725  |
| C11  | 0.7356281031  | -0.3013954804 | 3.1864086240  |
| O1   | -1.8609468652 | -0.5747958028 | 2.4956096068  |
| C18  | -0.6237789585 | -3.5271827454 | -2.3529926481 |
| C19  | -1.6685340606 | -1.3806005304 | -2.1369223149 |
| C20  | 0.3873166884  | -1.8132248068 | -1.0044955855 |
| C21  | 0.4005628849  | -3.0987065760 | -1.5265741655 |
| C22  | -1.6621537848 | -2.6602030620 | -2.6580089716 |
| H2   | -2.4767337670 | -0.7147731826 | -2.3856707687 |
| H5   | 1.1961101458  | -1.4960729267 | -0.3721531500 |
| H7   | 1.2107563871  | -3.7624724501 | -1.2840323475 |
| H8   | -2.4638595052 | -2.9804163264 | -3.3034488262 |
| H9   | -0.6149999484 | -4.5249075837 | -2.7576672169 |
| H10  | -1.1196782873 | 1.1084045557  | -1.5371345252 |
| C10  | -2.2101879934 | 2.0135325539  | 0.6896778270  |
| H11  | -1.3797349218 | 2.6761724580  | 0.9143090483  |

|     |               |               |               |
|-----|---------------|---------------|---------------|
| H12 | -2.9009236513 | 2.0370252332  | 1.5248857927  |
| H13 | -2.7199057493 | 2.4011167001  | -0.1872131765 |
| H14 | -2.6129286232 | -0.0334959701 | 0.2124107304  |
| H15 | 1.7064801047  | -0.7438772974 | 2.9994467822  |
| H16 | 0.0692473637  | -1.0479863456 | 3.5825710501  |
| H17 | 0.8406708959  | 0.4903666620  | 3.9202055479  |

nuclear repulsion energy..... 1415.828065416 hartrees

-----  
 / end of geometry optimization iteration 5 /  
 -----

end of program geopt

start of program onee  
 smallest eigenvalue of S: 3.353E-04  
 number of canonical orbitals..... 368  
 end of program onee

start of program probe  
 end of program probe

start of program grid

number of gridpoints:

| atom     | H1  | C1  | C2  | C3  | C4  | C5  | C6  |
|----------|-----|-----|-----|-----|-----|-----|-----|
| C7       |     |     |     |     |     |     |     |
| grid # 1 | 72  | 85  | 88  | 90  | 89  | 87  | 84  |
| 81       |     |     |     |     |     |     |     |
| grid # 2 | 116 | 95  | 95  | 98  | 97  | 97  | 95  |
| 90       |     |     |     |     |     |     |     |
| grid # 3 | 215 | 183 | 184 | 194 | 182 | 182 | 185 |
| 171      |     |     |     |     |     |     |     |
| grid # 4 | 215 | 326 | 327 | 336 | 326 | 326 | 323 |
| 315      |     |     |     |     |     |     |     |

number of gridpoints:

| atom     | H3  | H4  | H6  | C16 | C8  | N2  | C9  |
|----------|-----|-----|-----|-----|-----|-----|-----|
| C11      |     |     |     |     |     |     |     |
| grid # 1 | 73  | 73  | 70  | 92  | 82  | 95  | 81  |
| 69       |     |     |     |     |     |     |     |
| grid # 2 | 118 | 118 | 112 | 100 | 90  | 106 | 91  |
| 79       |     |     |     |     |     |     |     |
| grid # 3 | 223 | 223 | 207 | 197 | 174 | 210 | 175 |
| 142      |     |     |     |     |     |     |     |
| grid # 4 | 224 | 223 | 208 | 340 | 311 | 390 | 291 |
| 272      |     |     |     |     |     |     |     |

number of gridpoints:



|          |     |     |     |     |     |     |     |
|----------|-----|-----|-----|-----|-----|-----|-----|
| atom     | O1  | C18 | C19 | C20 | C21 | C22 | H2  |
| H5       |     |     |     |     |     |     |     |
| grid # 1 | 111 | 89  | 88  | 89  | 89  | 89  | 70  |
| 72       |     |     |     |     |     |     |     |
| grid # 2 | 122 | 97  | 96  | 96  | 97  | 97  | 113 |
| 112      |     |     |     |     |     |     |     |
| grid # 3 | 260 | 184 | 183 | 182 | 184 | 185 | 213 |
| 211      |     |     |     |     |     |     |     |
| grid # 4 | 455 | 328 | 326 | 327 | 327 | 328 | 214 |
| 208      |     |     |     |     |     |     |     |

number of gridpoints:

|          |     |     |     |     |     |     |     |
|----------|-----|-----|-----|-----|-----|-----|-----|
| atom     | H7  | H8  | H9  | H10 | C10 | H11 | H12 |
| H13      |     |     |     |     |     |     |     |
| grid # 1 | 73  | 73  | 73  | 68  | 73  | 72  | 71  |
| 71       |     |     |     |     |     |     |     |
| grid # 2 | 118 | 118 | 118 | 106 | 80  | 109 | 111 |
| 110      |     |     |     |     |     |     |     |
| grid # 3 | 223 | 223 | 224 | 204 | 149 | 216 | 219 |
| 217      |     |     |     |     |     |     |     |
| grid # 4 | 223 | 224 | 224 | 203 | 289 | 216 | 220 |
| 218      |     |     |     |     |     |     |     |

number of gridpoints:

|          |     |     |     |     |       |
|----------|-----|-----|-----|-----|-------|
| atom     | H14 | H15 | H16 | H17 | total |
| grid # 1 | 69  | 71  | 70  | 71  | 2863  |
| grid # 2 | 110 | 111 | 107 | 110 | 3735  |
| grid # 3 | 212 | 213 | 213 | 217 | 7179  |
| grid # 4 | 207 | 211 | 209 | 217 | 9927  |

end of program grid

start of program rwr

end of program rwr

start of program scf

|      | i | u | d | i | g |                  | RMS      | maximum |
|------|---|---|---|---|---|------------------|----------|---------|
|      | t | p | i | c | r |                  | energy   | DIIS    |
|      | e | d | i | u | i | total energy     | density  | error   |
|      | r | t | s | t | d | change           | change   |         |
| etot | 1 | N | N | 2 | U | -783.02597400383 | 2.1E-04  | 4.7E-03 |
| etot | 2 | Y | Y | 6 | M | -783.03241189408 | 6.4E-03  | 1.6E-03 |
| etot | 3 | N | Y | 2 | U | -783.03317956407 | 7.7E-04  | 5.4E-04 |
| etot | 4 | Y | Y | 6 | M | -783.03321306549 | 3.4E-05  | 2.0E-04 |
| etot | 5 | Y | Y | 6 | M | -783.03322573189 | 1.3E-05  | 8.0E-05 |
| etot | 6 | Y | N | 6 | M | -783.03322453549 | -1.2E-06 | 0.0E+00 |

Energy components, in hartrees:

|     |                               |                   |       |
|-----|-------------------------------|-------------------|-------|
| (A) | Nuclear repulsion.....        | 1415.82806541582  |       |
| (E) | Total one-electron terms..... | -3876.16654809424 |       |
| (I) | Total two-electron terms..... | 1677.30525814292  |       |
| (L) | Electronic energy.....        | -2198.86128995132 | (E+I) |
| (N) | Total energy.....             | -783.03322453549  | (A+L) |

SCFE: SCF energy: HF -783.03322453549 hartrees iterations:

6

HOMO energy: -0.30318  
LUMO energy: 0.13269

Orbital energies:

|           |           |           |           |           |           |
|-----------|-----------|-----------|-----------|-----------|-----------|
| -20.52404 | -15.59966 | -11.34325 | -11.28686 | -11.25522 | -11.24863 |
| -11.24140 | -11.24052 | -11.24005 | -11.23944 | -11.23924 | -11.23602 |
| -11.23093 | -11.23074 | -11.22958 | -11.22827 | -11.22758 | -11.22643 |
| -11.22341 | -1.39841  | -1.26863  | -1.16574  | -1.14929  | -1.10761  |
| -1.03275  | -1.01896  | -1.01851  | -1.01154  | -0.96033  | -0.93303  |
| -0.85749  | -0.84733  | -0.83408  | -0.82061  | -0.79583  | -0.74095  |
| -0.71048  | -0.70045  | -0.67056  | -0.65025  | -0.64812  | -0.63633  |
| -0.63120  | -0.61502  | -0.61154  | -0.60123  | -0.59687  | -0.58347  |
| -0.58113  | -0.56504  | -0.54880  | -0.54570  | -0.53540  | -0.52334  |
| -0.52010  | -0.50669  | -0.49877  | -0.49603  | -0.48540  | -0.46985  |
| -0.46502  | -0.42074  | -0.40834  | -0.34176  | -0.33211  | -0.32274  |
| -0.30318  | 0.13269   | 0.13430   | 0.14490   | 0.14931   | 0.20919   |
| 0.23163   | 0.23804   | 0.24590   | 0.26009   | 0.28867   |           |

end of program scf

start of program derla  
end of program derla

start of program rwr  
end of program rwr

start of program derlb

forces (hartrees/bohr) : total

| atom | label | x             | y             | z             |
|------|-------|---------------|---------------|---------------|
| 1    | H1    | 1.675721E-04  | -1.164981E-04 | 8.468534E-04  |
| 2    | C1    | 2.002624E-04  | 4.928235E-04  | -8.570723E-04 |
| 3    | C2    | 2.992181E-06  | 2.277514E-05  | 5.629316E-04  |
| 4    | C3    | 7.909091E-04  | 1.123698E-03  | -1.029025E-03 |
| 5    | C4    | -5.666933E-04 | 2.096215E-04  | -1.621562E-03 |
| 6    | C5    | 4.049877E-04  | -3.538448E-04 | 1.688360E-03  |

|       |       |               |               |               |
|-------|-------|---------------|---------------|---------------|
| 7     | C6    | 5.872342E-04  | -1.002550E-03 | 3.276145E-03  |
| 8     | C7    | -1.461532E-03 | 9.125176E-04  | -7.554179E-04 |
| 9     | H3    | -3.809159E-04 | -2.893079E-04 | 3.054658E-04  |
| 10    | H4    | -8.549588E-04 | -2.638272E-04 | -2.289291E-04 |
| 11    | H6    | -6.725574E-04 | 2.183269E-04  | -1.224473E-03 |
| 12    | C16   | 3.056431E-03  | 1.169990E-03  | 8.876220E-04  |
| 13    | C8    | -3.947226E-04 | 1.167398E-04  | 1.808986E-04  |
| 14    | N2    | 2.263462E-03  | 1.732744E-03  | -6.111698E-03 |
| 15    | C9    | 5.850544E-03  | 3.034761E-03  | -4.917864E-03 |
| 16    | C11   | -1.018353E-03 | -4.035924E-04 | 1.762748E-03  |
| 17    | O1    | -7.557601E-03 | -4.659006E-03 | 6.967255E-03  |
| 18    | C18   | 4.277214E-04  | -1.544302E-03 | -1.333327E-04 |
| 19    | C19   | -2.008165E-03 | -4.390206E-04 | -8.999623E-04 |
| 20    | C20   | 4.159773E-04  | -9.812098E-05 | 7.362616E-04  |
| 21    | C21   | -1.686095E-03 | 6.848704E-05  | -4.396321E-04 |
| 22    | C22   | -8.364665E-04 | -1.642458E-03 | -1.439833E-03 |
| 23    | H2    | -7.142391E-04 | 6.971094E-04  | -1.776284E-04 |
| 24    | H5    | -2.087682E-04 | 7.006852E-05  | -2.827353E-04 |
| 25    | H7    | 6.573289E-04  | -2.941138E-04 | 3.534378E-05  |
| 26    | H8    | 1.146995E-03  | 4.068772E-04  | 7.106086E-04  |
| 27    | H9    | 1.863614E-04  | 5.931925E-04  | 2.503962E-04  |
| 28    | H10   | 5.139008E-04  | -5.307195E-04 | 5.809641E-04  |
| 29    | C10   | 9.233737E-04  | 7.904455E-04  | 1.284104E-04  |
| 30    | H11   | -6.205778E-04 | -5.189377E-04 | -2.777039E-04 |
| 31    | H12   | -2.512100E-04 | -8.469830E-05 | -2.048055E-04 |
| 32    | H13   | -1.145209E-04 | -4.017320E-05 | 3.362203E-04  |
| 33    | H14   | 1.686984E-03  | 4.567354E-04  | 5.540596E-04  |
| 34    | H15   | -5.362436E-04 | 2.281842E-04  | -5.004878E-04 |
| 35    | H16   | -4.393583E-05 | -2.340951E-04 | -5.368865E-05 |
| 36    | H17   | 8.398658E-04  | 3.891635E-04  | 8.513466E-04  |
| ----- |       | -----         | -----         | -----         |
|       | total | 1.953463E-04  | 2.189955E-04  | -4.939585E-04 |

end of program der1b

start of program geopt 6

geometry optimization step 6

reading input hessian of dimension 108  
in five columns format

reading input hessian of dimension 108  
in five columns format

reading input hessian of dimension 108  
in five columns format

energy change: -7.4746E-04 . ( 5.0000E-05 )  
 gradient maximum: 1.1222E-02 . ( 4.5000E-04 )  
 gradient rms: 1.3753E-03 . ( 3.0000E-04 )  
 step size: 0.14346 trust radius: 0.30000  
 displacement maximum: 7.2326E-02 . ( 1.8000E-03 )

displacement rms: 1.2988E-02 . ( 1.2000E-03 )  
predicted energy change: -3.4038E-04 geom step: 1.4346E-01  
full step: 1.4346E-01  
molecular structure not yet converged...

center of mass moved by:  
x: 1.5551E-03 y: 5.5350E-03 z: 1.5789E-03

new geometry:

|      | angstroms     |               |               |
|------|---------------|---------------|---------------|
| atom | x             | y             | z             |
| H1   | 1.0801660630  | 1.8882146155  | -2.1980470207 |
| C1   | 1.4043101703  | 1.7637006482  | -1.1790517006 |
| C2   | 2.2171358013  | 1.4281609211  | 1.4402146704  |
| C3   | 0.5920484779  | 1.0627607658  | -0.3016633957 |
| C4   | 2.6196246935  | 2.2901996458  | -0.7733533632 |
| C5   | 3.0189180121  | 2.1163892674  | 0.5418548268  |
| C6   | 1.0022372601  | 0.8929567425  | 1.0260158942  |
| C7   | -0.7355433925 | 0.4813585973  | -0.7416683094 |
| H3   | 3.2389980795  | 2.8271955913  | -1.4701002422 |
| H4   | 3.9549877170  | 2.5226661976  | 0.8805388361  |
| H6   | 2.5408524327  | 1.3198336843  | 2.4565391994  |
| C16  | -0.6468414940 | -0.9412370247 | -1.2998974489 |
| C8   | -1.7326810113 | 0.5759065138  | 0.4292181215  |
| N2   | 0.1872505976  | 0.1672359993  | 1.9213605063  |
| C9   | -1.1612964033 | 0.0092929335  | 1.7151904478  |
| C11  | 0.7363515604  | -0.3331652384 | 3.1689455392  |
| O1   | -1.8763759804 | -0.5111855715 | 2.5260341186  |
| C18  | -0.6256862983 | -3.5426672544 | -2.3366816654 |
| C19  | -1.6642925482 | -1.3847844507 | -2.1500633631 |
| C20  | 0.3771278873  | -1.8238165705 | -0.9827589264 |
| C21  | 0.3815805454  | -3.1159670229 | -1.4925486977 |
| C22  | -1.6533000303 | -2.6686454310 | -2.6666506642 |
| H2   | -2.4712111135 | -0.7157725968 | -2.4142554675 |
| H5   | 1.1820663271  | -1.5100840973 | -0.3421502507 |
| H7   | 1.1876352664  | -3.7830571499 | -1.2304751274 |
| H8   | -2.4384418876 | -2.9813153157 | -3.3300159761 |
| H9   | -0.6118293347 | -4.5404666663 | -2.7360234260 |
| H10  | -1.1207548192 | 1.1056422804  | -1.5407053179 |
| C10  | -2.2109909388 | 2.0130706588  | 0.6859832063  |
| H11  | -1.3865451720 | 2.6803962402  | 0.9079369547  |
| H12  | -2.9037995456 | 2.0323688466  | 1.5189354328  |
| H13  | -2.7240673484 | 2.3934890835  | -0.1903800121 |
| H14  | -2.5960103008 | -0.0386542713 | 0.2224367318  |
| H15  | 1.6958727895  | -0.8010305494 | 2.9784069828  |
| H16  | 0.0467660819  | -1.0606078772 | 3.5657880936  |
| H17  | 0.8707108077  | 0.4596959140  | 3.8982617645  |

nuclear repulsion energy..... 1415.066943187 hartrees

-----  
/ end of geometry optimization iteration 6 /  
-----

end of program geopt

start of program onee  
smallest eigenvalue of S: 3.385E-04  
number of canonical orbitals..... 368  
end of program onee

start of program probe  
end of program probe

start of program grid

number of gridpoints:

|          | atom | H1  | C1  | C2  | C3  | C4  | C5  | C6  |
|----------|------|-----|-----|-----|-----|-----|-----|-----|
| C7       |      |     |     |     |     |     |     |     |
| grid # 1 |      | 72  | 85  | 88  | 88  | 89  | 88  | 85  |
| 81       |      |     |     |     |     |     |     |     |
| grid # 2 |      | 116 | 95  | 95  | 98  | 97  | 97  | 93  |
| 90       |      |     |     |     |     |     |     |     |
| grid # 3 |      | 215 | 182 | 182 | 193 | 182 | 183 | 191 |
| 171      |      |     |     |     |     |     |     |     |
| grid # 4 |      | 215 | 326 | 327 | 336 | 326 | 326 | 324 |
| 315      |      |     |     |     |     |     |     |     |

number of gridpoints:

|          | atom | H3  | H4  | H6  | C16 | C8  | N2  | C9  |
|----------|------|-----|-----|-----|-----|-----|-----|-----|
| C11      |      |     |     |     |     |     |     |     |
| grid # 1 |      | 73  | 73  | 71  | 89  | 82  | 95  | 81  |
| 68       |      |     |     |     |     |     |     |     |
| grid # 2 |      | 118 | 118 | 112 | 98  | 90  | 105 | 91  |
| 78       |      |     |     |     |     |     |     |     |
| grid # 3 |      | 224 | 223 | 207 | 196 | 174 | 212 | 176 |
| 149      |      |     |     |     |     |     |     |     |
| grid # 4 |      | 224 | 223 | 207 | 342 | 312 | 389 | 294 |
| 275      |      |     |     |     |     |     |     |     |

number of gridpoints:

|          | atom | O1  | C18 | C19 | C20 | C21 | C22 | H2  |
|----------|------|-----|-----|-----|-----|-----|-----|-----|
| H5       |      |     |     |     |     |     |     |     |
| grid # 1 |      | 111 | 89  | 88  | 89  | 88  | 89  | 70  |
| 72       |      |     |     |     |     |     |     |     |
| grid # 2 |      | 122 | 97  | 96  | 96  | 97  | 97  | 113 |
| 112      |      |     |     |     |     |     |     |     |
| grid # 3 |      | 261 | 183 | 183 | 182 | 183 | 185 | 215 |
| 211      |      |     |     |     |     |     |     |     |
| grid # 4 |      | 454 | 328 | 327 | 327 | 327 | 329 | 214 |
| 208      |      |     |     |     |     |     |     |     |

```

number of gridpoints:
  atom      H7      H8      H9      H10     C10     H11     H12
H13
  grid # 1   73      73      73      68      73      72      71
71
  grid # 2  118     118     118     106     81      109     110
110
  grid # 3  223     223     224     203     151     218     218
217
  grid # 4  223     223     224     199     287     216     220
219

```

```

number of gridpoints:
  atom      H14     H15     H16     H17    total
grid # 1    68      71      70      71    2858
grid # 2   109     109     108     111    3728
grid # 3   214     214     212     217    7197
grid # 4   206     212     209     219    9932

```

end of program grid

```

start of program rwr
end of program rwr

```

start of program scf

|      | i | u | d | i | g |                  | energy  | RMS     | maximum |
|------|---|---|---|---|---|------------------|---------|---------|---------|
|      | t | p | i | c | r |                  | change  | density | DIIS    |
|      | e | d | i | u | i | total energy     |         | change  | error   |
|      | r | t | s | t | d |                  |         |         |         |
| etot | 1 | N | N | 2 | U | -783.02847022184 |         | 1.7E-04 | 3.7E-03 |
| etot | 2 | Y | Y | 6 | M | -783.03270652417 | 4.2E-03 | 6.9E-05 | 1.4E-03 |
| etot | 3 | Y | Y | 6 | M | -783.03324029720 | 5.3E-04 | 1.7E-05 | 3.6E-04 |
| etot | 4 | N | Y | 2 | U | -783.03326918803 | 2.9E-05 | 1.0E-05 | 1.7E-04 |
| etot | 5 | Y | Y | 6 | M | -783.03328006917 | 1.1E-05 | 4.2E-06 | 6.2E-05 |
| etot | 6 | Y | N | 6 | M | -783.03328503981 | 5.0E-06 | 0.0E+00 | 0.0E+00 |

Energy components, in hartrees:

```

(A) Nuclear repulsion..... 1415.06694318720
(E) Total one-electron terms..... -3874.62895415063
(I) Total two-electron terms..... 1676.52872592362
(L) Electronic energy..... -2198.10022822701 (E+I)
(N) Total energy..... -783.03328503981 (A+L)

```

```

SCFE: SCF energy: HF      -783.03328503981 hartrees  iterations:
6

```

HOMO energy: -0.30318  
LUMO energy: 0.13205

Orbital energies:

|           |           |           |           |           |           |
|-----------|-----------|-----------|-----------|-----------|-----------|
| -20.52437 | -15.60129 | -11.34446 | -11.28759 | -11.25584 | -11.24877 |
| -11.24238 | -11.24099 | -11.24051 | -11.23981 | -11.23968 | -11.23635 |
| -11.23164 | -11.23121 | -11.22995 | -11.22978 | -11.22762 | -11.22697 |
| -11.22263 | -1.39479  | -1.27028  | -1.16488  | -1.14876  | -1.10745  |
| -1.03252  | -1.02039  | -1.01749  | -1.01108  | -0.96055  | -0.93317  |
| -0.85794  | -0.84823  | -0.83401  | -0.81995  | -0.79588  | -0.74214  |
| -0.71077  | -0.70000  | -0.67056  | -0.65082  | -0.64803  | -0.63591  |
| -0.63121  | -0.61559  | -0.61090  | -0.60207  | -0.59673  | -0.58304  |
| -0.58035  | -0.56470  | -0.54963  | -0.54513  | -0.53528  | -0.52345  |
| -0.51977  | -0.50684  | -0.49802  | -0.49581  | -0.48546  | -0.46977  |
| -0.46467  | -0.42105  | -0.40899  | -0.34182  | -0.33189  | -0.32296  |
| -0.30318  | 0.13205   | 0.13436   | 0.14392   | 0.14895   | 0.20697   |
| 0.23199   | 0.23810   | 0.24531   | 0.26008   | 0.28885   |           |

end of program scf

start of program derla  
end of program derla

start of program rwr  
end of program rwr

start of program der1b

forces (hartrees/bohr) : total

| atom | label | x             | y             | z             |
|------|-------|---------------|---------------|---------------|
| 1    | H1    | -1.795944E-04 | -3.118038E-05 | -5.583791E-05 |
| 2    | C1    | -9.321471E-04 | -1.054422E-03 | 1.537852E-03  |
| 3    | C2    | 3.738172E-04  | 5.618182E-04  | -1.604693E-03 |
| 4    | C3    | 4.633339E-04  | -4.790657E-04 | 8.062807E-04  |
| 5    | C4    | 9.243828E-04  | -2.522562E-04 | 2.710321E-03  |
| 6    | C5    | -9.761166E-04 | 2.168077E-04  | -1.855734E-03 |
| 7    | C6    | -7.223444E-04 | 2.808002E-04  | -2.805185E-03 |
| 8    | C7    | 1.080853E-03  | -2.615386E-04 | 6.869812E-04  |
| 9    | H3    | -1.144663E-04 | -2.874108E-04 | 5.832668E-04  |
| 10   | H4    | 4.603399E-04  | 1.843548E-04  | 1.776106E-04  |
| 11   | H6    | 2.764464E-04  | 5.832878E-05  | 3.241626E-04  |
| 12   | C16   | -2.695592E-03 | -9.096535E-04 | -1.068647E-03 |
| 13   | C8    | 1.226026E-03  | 2.439918E-04  | -1.106270E-04 |
| 14   | N2    | -3.287839E-03 | 3.994052E-04  | -3.612303E-04 |
| 15   | C9    | -1.059492E-03 | 1.376003E-03  | -5.188573E-04 |
| 16   | C11   | 2.263417E-03  | -2.016954E-03 | 8.502285E-04  |
| 17   | O1    | 2.165463E-03  | -2.488891E-04 | -5.789309E-04 |

|       |       |               |               |               |
|-------|-------|---------------|---------------|---------------|
| 18    | C18   | -1.253331E-03 | 8.327719E-04  | -1.439723E-04 |
| 19    | C19   | 1.543027E-03  | 6.599472E-04  | 6.523318E-04  |
| 20    | C20   | -4.201192E-04 | 3.846237E-04  | 1.701998E-04  |
| 21    | C21   | 2.997552E-03  | -1.857672E-04 | 8.678890E-04  |
| 22    | C22   | 1.367939E-03  | 1.530209E-03  | 1.016037E-03  |
| 23    | H2    | 2.246596E-03  | -1.181870E-03 | 6.893478E-04  |
| 24    | H5    | -9.109077E-04 | -2.534294E-04 | -7.596963E-04 |
| 25    | H7    | -1.535738E-03 | 8.203099E-04  | -5.485205E-04 |
| 26    | H8    | -1.046588E-03 | -8.283496E-04 | -4.464758E-04 |
| 27    | H9    | -1.997463E-04 | -6.373413E-04 | -3.318743E-04 |
| 28    | H10   | -3.080920E-04 | 4.572585E-04  | -6.527283E-04 |
| 29    | C10   | -4.130920E-04 | -4.711066E-04 | 3.445992E-05  |
| 30    | H11   | 5.597385E-04  | 4.950323E-04  | 1.682091E-04  |
| 31    | H12   | -4.445192E-05 | -5.587836E-06 | 3.099748E-04  |
| 32    | H13   | -3.350458E-04 | 3.825576E-04  | -6.762836E-04 |
| 33    | H14   | -1.590544E-03 | -6.651085E-04 | -7.114774E-04 |
| 34    | H15   | -9.276383E-04 | -6.500667E-05 | 6.632606E-04  |
| 35    | H16   | 1.566907E-03  | 8.756548E-04  | 2.830984E-04  |
| 36    | H17   | -4.744247E-04 | 1.974400E-04  | 1.036124E-04  |
| ----- |       | -----         | -----         | -----         |
|       | total | 8.852801E-05  | 1.223778E-04  | -5.956472E-04 |

end of program derlb

start of program geopt 7

geometry optimization step 7

reading input hessian of dimension 108  
in five columns format  
reading input hessian of dimension 108  
in five columns format  
reading input hessian of dimension 108  
in five columns format

energy change: -6.0504E-05 . ( 5.0000E-05 )  
gradient maximum: 4.4434E-03 . ( 4.5000E-04 )  
gradient rms: 1.1093E-03 . ( 3.0000E-04 )  
step size: 0.06659 trust radius: 0.30000  
displacement maximum: 2.9978E-02 . ( 1.8000E-03 )  
displacement rms: 6.0288E-03 . ( 1.2000E-03 )  
predicted energy change: -1.8030E-04 geom step: 6.6590E-02  
02 full step: 6.6590E-02  
molecular structure not yet converged...

center of mass moved by:

x: -8.2632E-05 y: -3.2548E-03 z: -8.9091E-04

new geometry:

angstroms  
atom x y z

S180



|     |               |               |               |
|-----|---------------|---------------|---------------|
| H1  | 1.0923157777  | 1.8511908883  | -2.1983526231 |
| C1  | 1.4115167194  | 1.7404583347  | -1.1764782013 |
| C2  | 2.2099688298  | 1.4438968105  | 1.4446995987  |
| C3  | 0.5918972532  | 1.0559313783  | -0.2957570059 |
| C4  | 2.6268091160  | 2.2688179827  | -0.7727834141 |
| C5  | 3.0184723991  | 2.1172746070  | 0.5434999002  |
| C6  | 0.9967751625  | 0.9023081325  | 1.0324585438  |
| C7  | -0.7361843676 | 0.4789582401  | -0.7372607371 |
| H3  | 3.2521285827  | 2.7905806029  | -1.4739093469 |
| H4  | 3.9537253111  | 2.5274064273  | 0.8821154777  |
| H6  | 2.5278775393  | 1.3520470460  | 2.4643436594  |
| C16 | -0.6491288396 | -0.9400839860 | -1.3020108980 |
| C8  | -1.7351623108 | 0.5694397388  | 0.4321267872  |
| N2  | 0.1811873010  | 0.1843246012  | 1.9335737921  |
| C9  | -1.1606918280 | 0.0033139557  | 1.7170309233  |
| C11 | 0.7416417813  | -0.3064363905 | 3.1853941553  |
| O1  | -1.8647412193 | -0.5393972714 | 2.5222979362  |
| C18 | -0.6296562981 | -3.5337966928 | -2.3543800013 |
| C19 | -1.6621038763 | -1.3773739128 | -2.1546452184 |
| C20 | 0.3741754249  | -1.8236368726 | -0.9917479192 |
| C21 | 0.3833296702  | -3.1102979459 | -1.5123563264 |
| C22 | -1.6564765951 | -2.6585532519 | -2.6763622249 |
| H2  | -2.4625438045 | -0.7045477710 | -2.4144940478 |
| H5  | 1.1754945077  | -1.5138870138 | -0.3491529199 |
| H7  | 1.1894433583  | -3.7786656821 | -1.2587161724 |
| H8  | -2.4479794746 | -2.9716827610 | -3.3351256950 |
| H9  | -0.6188686438 | -4.5305264830 | -2.7591191323 |
| H10 | -1.1199373585 | 1.1086564633  | -1.5348986584 |
| C10 | -2.2153192858 | 2.0058706778  | 0.6907562246  |
| H11 | -1.3904688093 | 2.6746020953  | 0.9120554439  |
| H12 | -2.9065154333 | 2.0238184668  | 1.5258496381  |
| H13 | -2.7313156619 | 2.3880483454  | -0.1846431288 |
| H14 | -2.5999536632 | -0.0459889345 | 0.2211875259  |
| H15 | 1.6981688916  | -0.7729477461 | 2.9942200459  |
| H16 | 0.0643131306  | -1.0332821968 | 3.5993257589  |
| H17 | 0.8743537234  | 0.4942438937  | 3.9054017493  |

nuclear repulsion energy..... 1415.254391435 hartrees

-----  
 / end of geometry optimization iteration 7 /  
 -----

end of program geopt

start of program onee  
 smallest eigenvalue of S: 3.340E-04  
 number of canonical orbitals..... 368  
 end of program onee

start of program probe

end of program probe

start of program grid

number of gridpoints:

| atom     | H1  | C1  | C2  | C3  | C4  | C5  | C6  |
|----------|-----|-----|-----|-----|-----|-----|-----|
| C7       |     |     |     |     |     |     |     |
| grid # 1 | 72  | 85  | 89  | 88  | 89  | 87  | 84  |
| 81       |     |     |     |     |     |     |     |
| grid # 2 | 116 | 95  | 95  | 98  | 97  | 97  | 95  |
| 90       |     |     |     |     |     |     |     |
| grid # 3 | 215 | 182 | 183 | 195 | 182 | 182 | 192 |
| 171      |     |     |     |     |     |     |     |
| grid # 4 | 215 | 326 | 327 | 336 | 326 | 326 | 324 |
| 315      |     |     |     |     |     |     |     |

number of gridpoints:

| atom     | H3  | H4  | H6  | C16 | C8  | N2  | C9  |
|----------|-----|-----|-----|-----|-----|-----|-----|
| C11      |     |     |     |     |     |     |     |
| grid # 1 | 73  | 73  | 70  | 90  | 82  | 95  | 81  |
| 70       |     |     |     |     |     |     |     |
| grid # 2 | 118 | 118 | 112 | 100 | 90  | 104 | 90  |
| 79       |     |     |     |     |     |     |     |
| grid # 3 | 224 | 223 | 207 | 196 | 174 | 212 | 176 |
| 141      |     |     |     |     |     |     |     |
| grid # 4 | 224 | 223 | 207 | 342 | 313 | 389 | 293 |
| 272      |     |     |     |     |     |     |     |

number of gridpoints:

| atom     | O1  | C18 | C19 | C20 | C21 | C22 | H2  |
|----------|-----|-----|-----|-----|-----|-----|-----|
| H5       |     |     |     |     |     |     |     |
| grid # 1 | 111 | 89  | 88  | 89  | 89  | 89  | 70  |
| 72       |     |     |     |     |     |     |     |
| grid # 2 | 122 | 97  | 96  | 96  | 97  | 97  | 113 |
| 112      |     |     |     |     |     |     |     |
| grid # 3 | 261 | 184 | 183 | 182 | 184 | 185 | 214 |
| 211      |     |     |     |     |     |     |     |
| grid # 4 | 455 | 328 | 326 | 327 | 327 | 328 | 214 |
| 208      |     |     |     |     |     |     |     |

number of gridpoints:

| atom     | H7  | H8  | H9  | H10 | C10 | H11 | H12 |
|----------|-----|-----|-----|-----|-----|-----|-----|
| H13      |     |     |     |     |     |     |     |
| grid # 1 | 73  | 73  | 73  | 68  | 72  | 72  | 71  |
| 71       |     |     |     |     |     |     |     |
| grid # 2 | 118 | 118 | 118 | 106 | 79  | 109 | 111 |
| 110      |     |     |     |     |     |     |     |
| grid # 3 | 223 | 223 | 224 | 203 | 152 | 218 | 219 |
| 217      |     |     |     |     |     |     |     |
| grid # 4 | 223 | 224 | 224 | 199 | 288 | 216 | 220 |
| 219      |     |     |     |     |     |     |     |

number of gridpoints:

|          | atom | H14 | H15 | H16 | H17  | total |
|----------|------|-----|-----|-----|------|-------|
| grid # 1 | 69   | 71  | 70  | 71  | 2860 |       |
| grid # 2 | 110  | 111 | 108 | 111 | 3733 |       |
| grid # 3 | 214  | 214 | 212 | 217 | 7195 |       |
| grid # 4 | 207  | 211 | 209 | 217 | 9928 |       |

end of program grid

start of program rwr

end of program rwr

start of program scf

|      | i | u | d | i | g |                  | RMS     | maximum |
|------|---|---|---|---|---|------------------|---------|---------|
|      | t | p | i | c | r |                  | density | DIIS    |
|      | e | d | i | u | i | energy           | change  | error   |
|      | r | t | s | t | d | total energy     | change  | error   |
| etot | 1 | N | N | 1 | U | -783.03211337809 | 9.1E-05 | 2.1E-03 |
| etot | 2 | Y | Y | 4 | M | -783.03315263951 | 1.0E-03 | 8.2E-04 |
| etot | 3 | Y | Y | 4 | M | -783.03328396338 | 1.3E-04 | 2.0E-04 |
| etot | 4 | Y | Y | 4 | M | -783.03329030749 | 6.3E-06 | 9.5E-05 |
| etot | 5 | Y | N | 4 | M | -783.03329301658 | 2.7E-06 | 0.0E+00 |

Energy components, in hartrees:

|     |                               |                   |       |
|-----|-------------------------------|-------------------|-------|
| (A) | Nuclear repulsion.....        | 1415.25439143469  |       |
| (E) | Total one-electron terms..... | -3875.00899226867 |       |
| (I) | Total two-electron terms..... | 1676.72130781740  |       |
| (L) | Electronic energy.....        | -2198.28768445127 | (E+I) |
| (N) | Total energy.....             | -783.03329301658  | (A+L) |

SCFE: SCF energy: HF -783.03329301658 hartrees iterations:

5

HOMO energy: -0.30336

LUMO energy: 0.13266

Orbital energies:

|           |           |           |           |           |           |
|-----------|-----------|-----------|-----------|-----------|-----------|
| -20.52329 | -15.60116 | -11.34402 | -11.28707 | -11.25578 | -11.24896 |
| -11.24176 | -11.24038 | -11.24016 | -11.23972 | -11.23905 | -11.23569 |
| -11.23088 | -11.23074 | -11.22977 | -11.22899 | -11.22755 | -11.22634 |
| -11.22317 | -1.39451  | -1.26957  | -1.16549  | -1.14939  | -1.10770  |
| -1.03300  | -1.01983  | -1.01809  | -1.01147  | -0.96121  | -0.93326  |
| -0.85792  | -0.84826  | -0.83447  | -0.82060  | -0.79599  | -0.74184  |
| -0.71088  | -0.70037  | -0.67046  | -0.65055  | -0.64828  | -0.63600  |
| -0.63140  | -0.61543  | -0.61084  | -0.60172  | -0.59652  | -0.58328  |

|          |          |          |          |          |          |
|----------|----------|----------|----------|----------|----------|
| -0.58063 | -0.56492 | -0.54948 | -0.54499 | -0.53546 | -0.52329 |
| -0.52040 | -0.50711 | -0.49811 | -0.49608 | -0.48509 | -0.47001 |
| -0.46487 | -0.42106 | -0.40862 | -0.34209 | -0.33185 | -0.32295 |
| -0.30336 | 0.13266  | 0.13428  | 0.14423  | 0.14938  | 0.20781  |
| 0.23187  | 0.23796  | 0.24562  | 0.25997  | 0.28874  |          |

end of program scf

start of program derla  
end of program derla

start of program rwr  
end of program rwr

start of program derlb

forces (hartrees/bohr) : total

| atom | label | x             | y             | z             |
|------|-------|---------------|---------------|---------------|
| 1    | H1    | -2.561799E-05 | 1.441824E-04  | -3.469907E-04 |
| 2    | C1    | -2.375602E-04 | -5.189115E-05 | 4.973580E-05  |
| 3    | C2    | -1.370691E-04 | -1.393459E-04 | 2.721944E-04  |
| 4    | C3    | -2.001109E-04 | -1.003181E-04 | -1.659379E-04 |
| 5    | C4    | 2.766633E-05  | 1.440521E-04  | -4.446108E-04 |
| 6    | C5    | 2.841382E-04  | 1.425504E-04  | 4.197984E-04  |
| 7    | C6    | 5.871213E-05  | -1.389429E-04 | -2.994472E-04 |
| 8    | C7    | 3.169600E-04  | 1.369830E-04  | -1.683716E-04 |
| 9    | H3    | 1.444461E-04  | 2.789461E-04  | -2.913196E-04 |
| 10   | H4    | -3.651574E-05 | -3.589678E-05 | 6.358694E-06  |
| 11   | H6    | 1.599072E-04  | -2.060178E-04 | 4.183373E-04  |
| 12   | C16   | -1.405498E-03 | -1.395263E-04 | -7.016079E-04 |
| 13   | C8    | -1.158821E-04 | -1.535882E-04 | -2.565339E-04 |
| 14   | N2    | 6.855257E-04  | 8.506849E-05  | 9.384433E-04  |
| 15   | C9    | -1.021740E-03 | -2.752968E-04 | 7.982523E-04  |
| 16   | C11   | -7.002099E-04 | -1.501068E-04 | -5.353494E-04 |
| 17   | O1    | -8.791091E-05 | -5.193848E-05 | -4.944080E-04 |
| 18   | C18   | 7.113236E-04  | -1.871434E-04 | 2.746115E-04  |
| 19   | C19   | 2.913371E-04  | 5.497427E-05  | 2.558909E-06  |
| 20   | C20   | 3.289849E-04  | -4.423926E-04 | 3.414301E-05  |
| 21   | C21   | 4.384409E-04  | -1.017656E-03 | -1.159728E-04 |
| 22   | C22   | -2.656651E-04 | 6.004971E-04  | -1.353645E-05 |
| 23   | H2    | -9.054830E-05 | 2.214191E-05  | -1.142243E-04 |
| 24   | H5    | 8.232658E-04  | 2.969922E-04  | 4.361003E-04  |
| 25   | H7    | -8.304240E-04 | 5.272169E-04  | -1.672065E-04 |
| 26   | H8    | 1.221024E-04  | 6.833266E-05  | 1.548769E-04  |
| 27   | H9    | -5.034033E-06 | -1.803031E-06 | 2.562835E-05  |
| 28   | H10   | 3.541751E-05  | -1.991384E-04 | 1.358901E-04  |
| 29   | C10   | -3.949816E-04 | 3.532173E-04  | 4.657291E-05  |

|       |       |               |               |               |
|-------|-------|---------------|---------------|---------------|
| 30    | H11   | -1.416711E-05 | 6.119304E-05  | 1.550520E-05  |
| 31    | H12   | 1.775882E-04  | 2.823262E-05  | -4.585842E-05 |
| 32    | H13   | 1.021600E-04  | -7.351969E-05 | -1.879154E-05 |
| 33    | H14   | 5.194675E-05  | 8.506471E-05  | 3.261954E-06  |
| 34    | H15   | 1.187325E-03  | -2.931321E-04 | -5.627831E-05 |
| 35    | H16   | -3.344376E-04 | 2.565469E-04  | -3.995527E-04 |
| 36    | H17   | 2.653277E-05  | 4.990028E-04  | 1.562437E-04  |
| ----- |       | -----         | -----         | -----         |
|       | total | 7.040787E-05  | 1.275403E-04  | -4.474850E-04 |

end of program der1b

start of program geopt 8

geometry optimization step 8

reading input hessian of dimension 108  
in five columns format

reading input hessian of dimension 108  
in five columns format

energy change: -7.9768E-06 \* ( 5.0000E-05 )  
 gradient maximum: 1.2001E-03 . ( 4.5000E-04 )  
 gradient rms: 3.6847E-04 . ( 3.0000E-04 )  
 step size: 0.05347 trust radius: 0.30000  
 displacement maximum: 1.6820E-02 . ( 1.8000E-03 )  
 displacement rms: 4.8410E-03 . ( 1.2000E-03 )  
 predicted energy change: -4.9411E-05 geom step: 5.3471E-02  
 02 full step: 5.3471E-02  
 molecular structure not yet converged...

center of mass moved by:

x: -1.4793E-03 y: -1.5748E-03 z: -1.5199E-03

new geometry:

|      | angstroms     |               |               |
|------|---------------|---------------|---------------|
| atom | x             | y             | z             |
| H1   | 1.0816861330  | 1.8840425267  | -2.1951883136 |
| C1   | 1.4041030358  | 1.7605003712  | -1.1745775370 |
| C2   | 2.2120903169  | 1.4328644204  | 1.4412821016  |
| C3   | 0.5896380418  | 1.0612002718  | -0.2991853718 |
| C4   | 2.6186438265  | 2.2899591325  | -0.7685117424 |
| C5   | 3.0161554441  | 2.1204797745  | 0.5447527791  |
| C6   | 0.9970350021  | 0.8966147796  | 1.0269105617  |
| C7   | -0.7362568597 | 0.4817290556  | -0.7421179592 |
| H3   | 3.2383096475  | 2.8265772164  | -1.4655445753 |
| H4   | 3.9523879644  | 2.5275136102  | 0.8849854941  |
| H6   | 2.5356115176  | 1.3260669481  | 2.4591629655  |
| C16  | -0.6487457754 | -0.9408717006 | -1.2994812195 |
| C8   | -1.7362167606 | 0.5790049353  | 0.4266407924  |
| N2   | 0.1800676838  | 0.1774452016  | 1.9276499701  |

|     |               |               |               |
|-----|---------------|---------------|---------------|
| C9  | -1.1650752636 | 0.0005935379  | 1.7091490781  |
| C11 | 0.7404984501  | -0.3241058656 | 3.1724009862  |
| O1  | -1.8707435440 | -0.5495828139 | 2.5065623157  |
| C18 | -0.6263613548 | -3.5404913230 | -2.3356614436 |
| C19 | -1.6580973795 | -1.3827123619 | -2.1506745151 |
| C20 | 0.3781896041  | -1.8210878297 | -0.9842938338 |
| C21 | 0.3866546999  | -3.1119249236 | -1.4959993720 |
| C22 | -1.6524333150 | -2.6669533162 | -2.6636735813 |
| H2  | -2.4570889226 | -0.7123831469 | -2.4158833258 |
| H5  | 1.1822529226  | -1.5042674077 | -0.3440280414 |
| H7  | 1.1853170011  | -3.7796722047 | -1.2351522628 |
| H8  | -2.4452078201 | -2.9863119135 | -3.3200572095 |
| H9  | -0.6191429954 | -4.5407029991 | -2.7330776765 |
| H10 | -1.1202192645 | 1.1063861556  | -1.5430642266 |
| C10 | -2.2030352195 | 2.0205614600  | 0.6910274193  |
| H11 | -1.3710122931 | 2.6817364715  | 0.9134320485  |
| H12 | -2.8911418488 | 2.0425983205  | 1.5281560251  |
| H13 | -2.7164082476 | 2.4097011918  | -0.1829463897 |
| H14 | -2.6077724674 | -0.0267166542 | 0.2132818415  |
| H15 | 1.7034039498  | -0.7823660909 | 2.9817088235  |
| H16 | 0.0626279120  | -1.0561919523 | 3.5750172237  |
| H17 | 0.8650150069  | 0.4708523322  | 3.9000971693  |

nuclear repulsion energy..... 1415.538815491 hartrees

-----  
 / end of geometry optimization iteration 8 /  
 -----

end of program geopt

start of program onee  
 smallest eigenvalue of S: 3.358E-04  
 number of canonical orbitals..... 368  
 end of program onee

start of program probe  
 end of program probe

start of program grid

number of gridpoints:

| atom     | H1  | C1  | C2  | C3  | C4  | C5  | C6  |
|----------|-----|-----|-----|-----|-----|-----|-----|
| C7       |     |     |     |     |     |     |     |
| grid # 1 | 72  | 85  | 88  | 89  | 89  | 87  | 83  |
| 81       |     |     |     |     |     |     |     |
| grid # 2 | 116 | 95  | 95  | 98  | 97  | 97  | 95  |
| 90       |     |     |     |     |     |     |     |
| grid # 3 | 215 | 182 | 183 | 195 | 181 | 183 | 189 |
| 171      |     |     |     |     |     |     |     |

|          |     |     |     |     |     |     |     |
|----------|-----|-----|-----|-----|-----|-----|-----|
| grid # 4 | 215 | 326 | 327 | 336 | 326 | 326 | 324 |
|----------|-----|-----|-----|-----|-----|-----|-----|

315

number of gridpoints:

| atom     | H3  | H4  | H6  | C16 | C8  | N2  | C9  |
|----------|-----|-----|-----|-----|-----|-----|-----|
| C11      |     |     |     |     |     |     |     |
| grid # 1 | 73  | 73  | 71  | 91  | 82  | 95  | 81  |
| 69       |     |     |     |     |     |     |     |
| grid # 2 | 118 | 118 | 112 | 100 | 90  | 105 | 90  |
| 80       |     |     |     |     |     |     |     |
| grid # 3 | 223 | 223 | 207 | 197 | 174 | 212 | 176 |
| 143      |     |     |     |     |     |     |     |
| grid # 4 | 224 | 223 | 207 | 340 | 313 | 389 | 293 |
| 272      |     |     |     |     |     |     |     |

number of gridpoints:

| atom     | O1  | C18 | C19 | C20 | C21 | C22 | H2  |
|----------|-----|-----|-----|-----|-----|-----|-----|
| H5       |     |     |     |     |     |     |     |
| grid # 1 | 111 | 89  | 88  | 89  | 89  | 89  | 70  |
| 72       |     |     |     |     |     |     |     |
| grid # 2 | 122 | 97  | 96  | 96  | 97  | 97  | 113 |
| 112      |     |     |     |     |     |     |     |
| grid # 3 | 261 | 184 | 183 | 182 | 184 | 185 | 215 |
| 211      |     |     |     |     |     |     |     |
| grid # 4 | 455 | 328 | 326 | 327 | 327 | 328 | 214 |
| 208      |     |     |     |     |     |     |     |

number of gridpoints:

| atom     | H7  | H8  | H9  | H10 | C10 | H11 | H12 |
|----------|-----|-----|-----|-----|-----|-----|-----|
| H13      |     |     |     |     |     |     |     |
| grid # 1 | 73  | 73  | 73  | 68  | 74  | 72  | 71  |
| 71       |     |     |     |     |     |     |     |
| grid # 2 | 118 | 118 | 118 | 107 | 80  | 109 | 111 |
| 110      |     |     |     |     |     |     |     |
| grid # 3 | 222 | 223 | 224 | 204 | 147 | 216 | 219 |
| 217      |     |     |     |     |     |     |     |
| grid # 4 | 223 | 224 | 224 | 199 | 287 | 216 | 220 |
| 219      |     |     |     |     |     |     |     |

number of gridpoints:

| atom     | H14 | H15 | H16 | H17 | total |
|----------|-----|-----|-----|-----|-------|
| grid # 1 | 69  | 71  | 70  | 71  | 2862  |
| grid # 2 | 110 | 110 | 107 | 111 | 3735  |
| grid # 3 | 214 | 213 | 213 | 217 | 7188  |
| grid # 4 | 207 | 211 | 209 | 217 | 9925  |

end of program grid

start of program rwr

end of program rwr

start of program scf

|      | i | u | d | i | g |                  | RMS      | maximum |
|------|---|---|---|---|---|------------------|----------|---------|
|      | t | p | i | c | r |                  | energy   | DIIS    |
|      | e | d | i | u | i | total energy     | density  | error   |
|      | r | t | s | t | d | change           | change   |         |
| etot | 1 | N | N | 1 | U | -783.03262608496 | 7.0E-05  | 1.8E-03 |
| etot | 2 | Y | Y | 4 | M | -783.03318790467 | 5.6E-04  | 6.9E-04 |
| etot | 3 | Y | Y | 4 | M | -783.03326242701 | 7.5E-05  | 1.6E-04 |
| etot | 4 | Y | Y | 4 | M | -783.03326768614 | 5.3E-06  | 6.4E-05 |
| etot | 5 | Y | N | 4 | M | -783.03326728739 | -4.0E-07 | 0.0E+00 |

Energy components, in hartrees:

|     |                               |                   |       |
|-----|-------------------------------|-------------------|-------|
| (A) | Nuclear repulsion.....        | 1415.53881549128  |       |
| (E) | Total one-electron terms..... | -3875.58413882566 |       |
| (I) | Total two-electron terms..... | 1677.01205604700  |       |
| (L) | Electronic energy.....        | -2198.57208277867 | (E+I) |
| (N) | Total energy.....             | -783.03326728739  | (A+L) |

SCFE: SCF energy: HF -783.03326728739 hartrees iterations:  
5

HOMO energy: -0.30335  
LUMO energy: 0.13251

Orbital energies:

|           |           |           |           |           |           |
|-----------|-----------|-----------|-----------|-----------|-----------|
| -20.52422 | -15.60084 | -11.34433 | -11.28710 | -11.25572 | -11.24887 |
| -11.24187 | -11.24060 | -11.24017 | -11.24002 | -11.23942 | -11.23611 |
| -11.23121 | -11.23083 | -11.22944 | -11.22863 | -11.22755 | -11.22673 |
| -11.22337 | -1.39506  | -1.26930  | -1.16532  | -1.14916  | -1.10737  |
| -1.03244  | -1.01967  | -1.01820  | -1.01119  | -0.96068  | -0.93312  |
| -0.85763  | -0.84770  | -0.83424  | -0.82064  | -0.79584  | -0.74144  |
| -0.71058  | -0.70035  | -0.67036  | -0.65035  | -0.64806  | -0.63599  |
| -0.63133  | -0.61524  | -0.61098  | -0.60158  | -0.59670  | -0.58304  |
| -0.58072  | -0.56476  | -0.54949  | -0.54513  | -0.53548  | -0.52346  |
| -0.52002  | -0.50669  | -0.49837  | -0.49594  | -0.48526  | -0.46990  |
| -0.46480  | -0.42088  | -0.40862  | -0.34176  | -0.33181  | -0.32300  |
| -0.30335  | 0.13251   | 0.13442   | 0.14423   | 0.14927   | 0.20781   |
| 0.23176   | 0.23795   | 0.24555   | 0.25996   | 0.28880   |           |

end of program scf

start of program derla  
end of program derla

start of program rwr



end of program rwr

start of program der1b

forces (hartrees/bohr) : total

| atom  | label | x             | y             | z             |
|-------|-------|---------------|---------------|---------------|
| 1     | H1    | 5.924487E-05  | -1.698414E-04 | 4.945989E-04  |
| 2     | C1    | -4.306166E-04 | -1.906763E-04 | -2.445113E-04 |
| 3     | C2    | 6.945001E-04  | 4.208680E-04  | -5.881157E-05 |
| 4     | C3    | 4.153490E-04  | 2.717039E-04  | -8.090204E-04 |
| 5     | C4    | 1.220850E-04  | 1.364500E-04  | 3.652957E-06  |
| 6     | C5    | -1.960677E-04 | -3.286759E-04 | 4.851748E-04  |
| 7     | C6    | -7.041621E-05 | 1.367634E-04  | 9.398904E-04  |
| 8     | C7    | -4.660474E-04 | 2.548686E-04  | 1.067902E-04  |
| 9     | H3    | -3.315313E-04 | -3.971046E-04 | 4.474358E-04  |
| 10    | H4    | -1.966963E-04 | -6.220120E-05 | -3.438675E-06 |
| 11    | H6    | -2.350673E-04 | 2.210331E-04  | -5.897978E-04 |
| 12    | C16   | 1.351508E-03  | 2.531776E-04  | 4.480387E-04  |
| 13    | C8    | -1.630797E-05 | 6.884564E-05  | 2.688462E-04  |
| 14    | N2    | -1.020637E-03 | 2.139831E-04  | -2.159239E-03 |
| 15    | C9    | 1.019885E-03  | 2.978178E-04  | -6.807836E-04 |
| 16    | C11   | 2.130489E-04  | -5.359970E-05 | 3.094795E-04  |
| 17    | O1    | -1.071569E-04 | -2.153301E-04 | 6.284247E-04  |
| 18    | C18   | 7.268573E-05  | -2.430718E-04 | 1.851506E-04  |
| 19    | C19   | -4.091382E-04 | -4.544223E-04 | -2.505725E-04 |
| 20    | C20   | 5.607001E-04  | -1.083909E-04 | 5.326203E-04  |
| 21    | C21   | -1.795300E-03 | 1.190627E-03  | -3.540111E-04 |
| 22    | C22   | -8.173410E-04 | -5.378115E-04 | -9.088058E-04 |
| 23    | H2    | -8.911332E-04 | 6.189957E-04  | -2.764273E-04 |
| 24    | H5    | -8.524622E-04 | -5.050876E-04 | -7.049149E-04 |
| 25    | H7    | 1.870322E-03  | -1.108338E-03 | 4.169543E-04  |
| 26    | H8    | 8.472170E-04  | 5.514282E-04  | 6.407214E-04  |
| 27    | H9    | 2.861665E-04  | 3.072477E-04  | 2.601660E-04  |
| 28    | H10   | 9.951616E-05  | 9.931045E-05  | -8.752772E-05 |
| 29    | C10   | 8.986294E-04  | 2.271535E-05  | -1.644992E-04 |
| 30    | H11   | -5.936936E-04 | -4.761906E-04 | -2.246065E-04 |
| 31    | H12   | -2.043974E-04 | -7.395980E-05 | -5.741068E-05 |
| 32    | H13   | 4.280655E-05  | -3.540085E-05 | 1.777502E-04  |
| 33    | H14   | 3.718017E-04  | 1.021524E-04  | 1.199468E-04  |
| 34    | H15   | -5.126754E-04 | -7.471762E-05 | -3.759131E-05 |
| 35    | H16   | 1.790997E-06  | -3.854786E-04 | 1.042483E-04  |
| 36    | H17   | 2.644802E-04  | 3.809759E-04  | 5.626473E-04  |
| total |       | 4.505239E-05  | 1.286655E-04  | -4.794324E-04 |

end of program der1b

start of program geopt 9

geometry optimization step 9  
reading input hessian of dimension 108  
in five columns format  
reading input hessian of dimension 108  
in five columns format  
reading input hessian of dimension 108  
in five columns format

energy change: 2.5729E-05 \* ( 5.0000E-05 )  
gradient maximum: 2.1723E-03 . ( 4.5000E-04 )  
gradient rms: 4.7051E-04 . ( 3.0000E-04 )  
step size: 0.03081 trust radius: 0.30000  
displacement maximum: 1.1611E-02 . ( 1.8000E-03 )  
displacement rms: 2.7898E-03 . ( 1.2000E-03 )  
predicted energy change: -3.8840E-05 geom step: 3.0814E-  
02 full step: 3.0814E-02  
molecular structure not yet converged...

center of mass moved by:  
x: 9.2336E-04 y: 5.5039E-04 z: 4.5133E-04

new geometry:

|      | angstroms     |               |               |
|------|---------------|---------------|---------------|
| atom | x             | y             | z             |
| H1   | 1.0844844141  | 1.8701898015  | -2.1974597564 |
| C1   | 1.4061457753  | 1.7519299507  | -1.1766171090 |
| C2   | 2.2124039603  | 1.4370758334  | 1.4417698691  |
| C3   | 0.5902078799  | 1.0591653320  | -0.2984905716 |
| C4   | 2.6215931983  | 2.2805272972  | -0.7717881018 |
| C5   | 3.0178554775  | 2.1180369052  | 0.5427310546  |
| C6   | 0.9974410821  | 0.8995193672  | 1.0286405571  |
| C7   | -0.7370767256 | 0.4808286999  | -0.7393413455 |
| H3   | 3.2432607067  | 2.8105750610  | -1.4707527196 |
| H4   | 3.9541898259  | 2.5253402884  | 0.8815668951  |
| H6   | 2.5344910545  | 1.3358407023  | 2.4599769264  |
| C16  | -0.6500012096 | -0.9402810133 | -1.3001162044 |
| C8   | -1.7356927734 | 0.5738069846  | 0.4303665957  |
| N2   | 0.1817746829  | 0.1803027199  | 1.9292482414  |
| C9   | -1.1620016596 | 0.0012289040  | 1.7133102276  |
| C11  | 0.7425555462  | -0.3136064032 | 3.1783946283  |
| O1   | -1.8654660106 | -0.5468244684 | 2.5143123412  |
| C18  | -0.6276428155 | -3.5362655489 | -2.3442554611 |
| C19  | -1.6591207244 | -1.3777797940 | -2.1561634447 |
| C20  | 0.3727474924  | -1.8240405886 | -0.9823149942 |
| C21  | 0.3813118422  | -3.1128753933 | -1.4982354250 |
| C22  | -1.6513616476 | -2.6599672614 | -2.6741729910 |
| H2   | -2.4590212935 | -0.7053173881 | -2.4214471080 |
| H5   | 1.1727008484  | -1.5127940672 | -0.3372649560 |
| H7   | 1.1824177497  | -3.7822724134 | -1.2375707695 |
| H8   | -2.4388510614 | -2.9732227544 | -3.3363716591 |

|     |               |               |               |
|-----|---------------|---------------|---------------|
| H9  | -0.6169260698 | -4.5342742140 | -2.7456222569 |
| H10 | -1.1214724801 | 1.1078460911  | -1.5383312899 |
| C10 | -2.2101790577 | 2.0118794381  | 0.6926020483  |
| H11 | -1.3832236519 | 2.6773280821  | 0.9147759230  |
| H12 | -2.8998683380 | 2.0306429003  | 1.5286602273  |
| H13 | -2.7250692209 | 2.3972836550  | -0.1817385072 |
| H14 | -2.6032404246 | -0.0371573901 | 0.2187239683  |
| H15 | 1.7029194243  | -0.7778244670 | 2.9890138378  |
| H16 | 0.0631335767  | -1.0416626789 | 3.5870589328  |
| H17 | 0.8717192541  | 0.4864178078  | 3.9014030282  |

nuclear repulsion energy..... 1415.473951373 hartrees

-----  
 / end of geometry optimization iteration 9 /  
 -----

end of program geopt

start of program onee  
 smallest eigenvalue of S: 3.353E-04  
 number of canonical orbitals..... 368  
 end of program onee

start of program probe  
 end of program probe

start of program grid

number of gridpoints:

| atom     | H1  | C1  | C2  | C3  | C4  | C5  | C6  |
|----------|-----|-----|-----|-----|-----|-----|-----|
| C7       |     |     |     |     |     |     |     |
| grid # 1 | 72  | 85  | 88  | 88  | 89  | 87  | 84  |
| 81       |     |     |     |     |     |     |     |
| grid # 2 | 116 | 95  | 95  | 98  | 97  | 97  | 95  |
| 90       |     |     |     |     |     |     |     |
| grid # 3 | 215 | 182 | 183 | 195 | 181 | 183 | 192 |
| 171      |     |     |     |     |     |     |     |
| grid # 4 | 215 | 326 | 327 | 336 | 326 | 326 | 324 |
| 315      |     |     |     |     |     |     |     |

number of gridpoints:

| atom     | H3  | H4  | H6  | C16 | C8  | N2  | C9  |
|----------|-----|-----|-----|-----|-----|-----|-----|
| C11      |     |     |     |     |     |     |     |
| grid # 1 | 73  | 73  | 71  | 90  | 82  | 95  | 81  |
| 70       |     |     |     |     |     |     |     |
| grid # 2 | 118 | 118 | 112 | 100 | 90  | 105 | 90  |
| 80       |     |     |     |     |     |     |     |
| grid # 3 | 223 | 223 | 207 | 198 | 174 | 212 | 176 |
| 143      |     |     |     |     |     |     |     |

grid # 4        224      223      207      342      312      390      293  
273

number of gridpoints:

|          |     |     |     |     |     |     |     |
|----------|-----|-----|-----|-----|-----|-----|-----|
| atom     | 01  | C18 | C19 | C20 | C21 | C22 | H2  |
| H5       |     |     |     |     |     |     |     |
| grid # 1 | 111 | 89  | 88  | 89  | 89  | 89  | 70  |
| 72       |     |     |     |     |     |     |     |
| grid # 2 | 122 | 97  | 96  | 96  | 97  | 97  | 113 |
| 112      |     |     |     |     |     |     |     |
| grid # 3 | 261 | 184 | 183 | 182 | 184 | 185 | 215 |
| 211      |     |     |     |     |     |     |     |
| grid # 4 | 455 | 328 | 326 | 327 | 327 | 328 | 214 |
| 208      |     |     |     |     |     |     |     |

number of gridpoints:

|          |     |     |     |     |     |     |     |
|----------|-----|-----|-----|-----|-----|-----|-----|
| atom     | H7  | H8  | H9  | H10 | C10 | H11 | H12 |
| H13      |     |     |     |     |     |     |     |
| grid # 1 | 73  | 73  | 73  | 68  | 71  | 72  | 71  |
| 71       |     |     |     |     |     |     |     |
| grid # 2 | 118 | 118 | 118 | 105 | 79  | 109 | 111 |
| 110      |     |     |     |     |     |     |     |
| grid # 3 | 222 | 223 | 224 | 202 | 156 | 216 | 218 |
| 217      |     |     |     |     |     |     |     |
| grid # 4 | 223 | 223 | 224 | 199 | 290 | 216 | 220 |
| 219      |     |     |     |     |     |     |     |

number of gridpoints:

|          |     |     |     |     |       |
|----------|-----|-----|-----|-----|-------|
| atom     | H14 | H15 | H16 | H17 | total |
| grid # 1 | 69  | 71  | 70  | 71  | 2859  |
| grid # 2 | 110 | 111 | 108 | 111 | 3734  |
| grid # 3 | 214 | 213 | 212 | 217 | 7197  |
| grid # 4 | 207 | 211 | 209 | 218 | 9931  |

end of program grid

start of program rwr

end of program rwr

start of program scf

|      | i | u | d | i | g |                  | RMS     | maximum |         |
|------|---|---|---|---|---|------------------|---------|---------|---------|
|      | t | p | i | c | r |                  | density | DIIS    |         |
|      | e | d | i | u | i | energy           | change  | error   |         |
|      | r | t | s | t | d | total energy     | change  |         |         |
| etot | 1 | N | N | 1 | U | -783.03311925796 |         | 4.7E-05 | 9.5E-04 |
| etot | 2 | Y | Y | 4 | M | -783.03329464641 | 1.8E-04 | 1.5E-05 | 3.7E-04 |
| etot | 3 | Y | Y | 4 | M | -783.03331774901 | 2.3E-05 | 3.9E-06 | 9.8E-05 |
| etot | 4 | Y | N | 4 | M | -783.03331961579 | 1.9E-06 | 0.0E+00 | 0.0E+00 |

Energy components, in hartrees:

|     |                               |                   |       |
|-----|-------------------------------|-------------------|-------|
| (A) | Nuclear repulsion.....        | 1415.47395137304  |       |
| (E) | Total one-electron terms..... | -3875.45222845079 |       |
| (I) | Total two-electron terms..... | 1676.94495746196  |       |
| (L) | Electronic energy.....        | -2198.50727098884 | (E+I) |
| (N) | Total energy.....             | -783.03331961579  | (A+L) |

SCFE: SCF energy: HF -783.03331961579 hartrees iterations:

4

HOMO energy: -0.30318  
LUMO energy: 0.13261

Orbital energies:

|           |           |           |           |           |           |
|-----------|-----------|-----------|-----------|-----------|-----------|
| -20.52389 | -15.60093 | -11.34409 | -11.28711 | -11.25606 | -11.24885 |
| -11.24177 | -11.24028 | -11.24025 | -11.23993 | -11.23919 | -11.23587 |
| -11.23101 | -11.23068 | -11.22966 | -11.22909 | -11.22745 | -11.22649 |
| -11.22306 | -1.39506  | -1.26950  | -1.16531  | -1.14918  | -1.10756  |
| -1.03275  | -1.01967  | -1.01809  | -1.01135  | -0.96076  | -0.93322  |
| -0.85780  | -0.84803  | -0.83432  | -0.82042  | -0.79597  | -0.74168  |
| -0.71071  | -0.70034  | -0.67046  | -0.65042  | -0.64806  | -0.63596  |
| -0.63140  | -0.61535  | -0.61093  | -0.60157  | -0.59668  | -0.58325  |
| -0.58073  | -0.56482  | -0.54931  | -0.54506  | -0.53544  | -0.52342  |
| -0.52017  | -0.50684  | -0.49829  | -0.49604  | -0.48527  | -0.46995  |
| -0.46477  | -0.42097  | -0.40867  | -0.34193  | -0.33192  | -0.32291  |
| -0.30318  | 0.13261   | 0.13443   | 0.14416   | 0.14933   | 0.20787   |
| 0.23206   | 0.23808   | 0.24564   | 0.26000   | 0.28882   |           |

end of program scf

start of program derla  
end of program derla

start of program rwr  
end of program rwr

start of program derlb

forces (hartrees/bohr) : total

| atom | label | x            | y            | z             |
|------|-------|--------------|--------------|---------------|
| 1    | H1    | 2.653930E-05 | 1.283737E-05 | 5.879594E-05  |
| 2    | C1    | 3.465086E-05 | 3.977592E-05 | 5.907003E-05  |
| 3    | C2    | 4.118131E-05 | 1.260658E-05 | -3.790428E-05 |
| 4    | C3    | 1.139528E-04 | 7.019300E-05 | -2.649424E-06 |

|       |       |               |               |               |
|-------|-------|---------------|---------------|---------------|
| 5     | C4    | -5.053707E-05 | -3.462465E-05 | 7.508451E-05  |
| 6     | C5    | -1.032984E-04 | -7.379808E-06 | -6.261655E-05 |
| 7     | C6    | 1.479133E-05  | 1.033791E-07  | 6.770898E-05  |
| 8     | C7    | 1.479659E-05  | -4.543684E-05 | 1.438173E-05  |
| 9     | H3    | -1.749304E-05 | 1.474057E-05  | 2.759666E-05  |
| 10    | H4    | -1.860931E-05 | 3.528595E-05  | -1.129441E-05 |
| 11    | H6    | -7.209243E-05 | 2.565000E-05  | -1.338413E-04 |
| 12    | C16   | -4.249178E-05 | 9.263117E-05  | -9.882289E-05 |
| 13    | C8    | 5.583022E-05  | 4.732389E-05  | 3.422178E-05  |
| 14    | N2    | 1.341274E-04  | 1.820265E-04  | -1.673886E-04 |
| 15    | C9    | 4.217725E-04  | 5.870173E-05  | -4.655713E-04 |
| 16    | C11   | 5.083554E-05  | -1.141339E-04 | 2.594866E-04  |
| 17    | O1    | -4.711598E-04 | -2.946450E-04 | 4.512547E-04  |
| 18    | C18   | -4.049014E-05 | -9.831823E-05 | -4.407278E-05 |
| 19    | C19   | -1.913841E-05 | 3.446178E-04  | 7.019929E-05  |
| 20    | C20   | -3.456621E-04 | -1.559184E-04 | -1.489936E-04 |
| 21    | C21   | 1.522859E-04  | 1.719323E-04  | 1.368587E-04  |
| 22    | C22   | 1.511631E-04  | 8.144872E-06  | -9.173436E-06 |
| 23    | H2    | 4.041633E-04  | -2.295359E-04 | 4.489057E-05  |
| 24    | H5    | 2.393986E-04  | 1.277236E-04  | 2.696163E-05  |
| 25    | H7    | 6.796874E-05  | -2.422476E-05 | 1.935922E-06  |
| 26    | H8    | -3.518606E-04 | -2.264490E-04 | -1.718998E-04 |
| 27    | H9    | -4.573771E-05 | -4.964521E-05 | -2.099991E-05 |
| 28    | H10   | -2.019072E-05 | -8.248216E-06 | -2.676481E-05 |
| 29    | C10   | -1.072579E-04 | 6.001060E-05  | -4.385796E-06 |
| 30    | H11   | 1.555043E-04  | 8.839612E-05  | -3.058923E-06 |
| 31    | H12   | -5.009177E-05 | -8.249944E-06 | -2.862638E-05 |
| 32    | H13   | -2.629242E-05 | 2.779693E-05  | -6.925027E-05 |
| 33    | H14   | -3.052893E-05 | -5.531269E-05 | -4.222350E-05 |
| 34    | H15   | -3.808533E-04 | 1.568089E-04  | -6.691163E-07 |
| 35    | H16   | 1.655158E-04  | 7.330286E-05  | -5.891178E-05 |
| 36    | H17   | 3.202979E-05  | -1.567197E-04 | -1.557730E-04 |
| ----- |       | -----         | -----         | -----         |
|       | total | 8.272150E-05  | 1.417678E-04  | -4.364448E-04 |

end of program der1b

start of program geopt 10

geometry optimization step 10

reading input hessian of dimension 108

in five columns format

reading input hessian of dimension 108

in five columns format

energy change: -5.2328E-05 . ( 5.0000E-05 )

gradient maximum: 7.2298E-04 . ( 4.5000E-04 )

gradient rms: 1.4823E-04 \* ( 3.0000E-04 )

step size: 0.01985 trust radius: 0.30000

displacement maximum: 9.2557E-03 . ( 1.8000E-03 )

displacement rms: 1.7968E-03 . ( 1.2000E-03 )  
predicted energy change: -9.6662E-06 geom step: 1.9847E-  
02 full step: 1.9847E-02  
molecular structure not yet converged...

center of mass moved by:  
x: -3.4160E-04 y: 4.3380E-04 z: -1.0661E-04

new geometry:

|      | angstroms     |               |               |
|------|---------------|---------------|---------------|
| atom | x             | y             | z             |
| H1   | 1.0879801414  | 1.8748513079  | -2.1961717168 |
| C1   | 1.4082030221  | 1.7557955777  | -1.1751925975 |
| C2   | 2.2104278303  | 1.4394263360  | 1.4443413822  |
| C3   | 0.5921048153  | 1.0605115239  | -0.2992184543 |
| C4   | 2.6217774218  | 2.2861160029  | -0.7676712220 |
| C5   | 3.0159537020  | 2.1230325160  | 0.5473444336  |
| C6   | 0.9973706610  | 0.8998875884  | 1.0286097720  |
| C7   | -0.7344350112 | 0.4814952331  | -0.7420550785 |
| H3   | 3.2436853967  | 2.8182825519  | -1.4648307209 |
| H4   | 3.9507179297  | 2.5324631048  | 0.8881907809  |
| H6   | 2.5304324666  | 1.3381929042  | 2.4628679879  |
| C16  | -0.6476150932 | -0.9403475856 | -1.3010522351 |
| C8   | -1.7341144329 | 0.5760768822  | 0.4267143926  |
| N2   | 0.1808085506  | 0.1786588420  | 1.9267636810  |
| C9   | -1.1623333515 | 0.0005960869  | 1.7092261203  |
| C11  | 0.7398902540  | -0.3220890665 | 3.1738583173  |
| O1   | -1.8679197186 | -0.5471333006 | 2.5094719797  |
| C18  | -0.6310797670 | -3.5405690019 | -2.3376143029 |
| C19  | -1.6616671344 | -1.3820891979 | -2.1495487380 |
| C20  | 0.3776631218  | -1.8218359150 | -0.9881094553 |
| C21  | 0.3843249178  | -3.1121488437 | -1.5005098545 |
| C22  | -1.6583692944 | -2.6669556475 | -2.6630526898 |
| H2   | -2.4623405509 | -0.7113794691 | -2.4121537185 |
| H5   | 1.1829250301  | -1.5069748728 | -0.3501791669 |
| H7   | 1.1908264693  | -3.7785068140 | -1.2448539860 |
| H8   | -2.4523531677 | -2.9847977060 | -3.3175539074 |
| H9   | -0.6228438969 | -4.5401318039 | -2.7357367734 |
| H10  | -1.1177981737 | 1.1073708636  | -1.5423745734 |
| C10  | -2.2050250193 | 2.0154024256  | 0.6896001507  |
| H11  | -1.3765270547 | 2.6775949378  | 0.9167962567  |
| H12  | -2.8986113227 | 2.0342419573  | 1.5223679953  |
| H13  | -2.7151360787 | 2.4047262043  | -0.1860534962 |
| H14  | -2.6029179885 | -0.0327873938 | 0.2139466596  |
| H15  | 1.6978274364  | -0.7869965137 | 2.9815736298  |
| H16  | 0.0599281311  | -1.0514720881 | 3.5782560267  |
| H17  | 0.8718859681  | 0.4728282894  | 3.9005347499  |

nuclear repulsion energy..... 1415.527495173 hartrees

-----  
/ end of geometry optimization iteration 10 /

-----  
end of program geopt

start of program onee  
smallest eigenvalue of S: 3.352E-04  
number of canonical orbitals..... 368  
end of program onee

start of program probe  
end of program probe

start of program grid

number of gridpoints:

|     | atom     | H1  | C1  | C2  | C3  | C4  | C5  | C6  |
|-----|----------|-----|-----|-----|-----|-----|-----|-----|
| C7  |          |     |     |     |     |     |     |     |
|     | grid # 1 | 72  | 85  | 88  | 88  | 89  | 88  | 84  |
| 81  |          |     |     |     |     |     |     |     |
|     | grid # 2 | 116 | 95  | 95  | 98  | 97  | 97  | 95  |
| 90  |          |     |     |     |     |     |     |     |
|     | grid # 3 | 215 | 182 | 183 | 194 | 181 | 183 | 194 |
| 171 |          |     |     |     |     |     |     |     |
|     | grid # 4 | 215 | 326 | 327 | 336 | 326 | 326 | 325 |
| 315 |          |     |     |     |     |     |     |     |

number of gridpoints:

|     | atom     | H3  | H4  | H6  | C16 | C8  | N2  | C9  |
|-----|----------|-----|-----|-----|-----|-----|-----|-----|
| C11 |          |     |     |     |     |     |     |     |
|     | grid # 1 | 73  | 73  | 71  | 90  | 82  | 95  | 81  |
| 70  |          |     |     |     |     |     |     |     |
|     | grid # 2 | 118 | 118 | 112 | 100 | 90  | 104 | 90  |
| 80  |          |     |     |     |     |     |     |     |
|     | grid # 3 | 223 | 223 | 207 | 196 | 174 | 212 | 176 |
| 143 |          |     |     |     |     |     |     |     |
|     | grid # 4 | 224 | 223 | 207 | 342 | 312 | 390 | 293 |
| 272 |          |     |     |     |     |     |     |     |

number of gridpoints:

|     | atom     | O1  | C18 | C19 | C20 | C21 | C22 | H2  |
|-----|----------|-----|-----|-----|-----|-----|-----|-----|
| H5  |          |     |     |     |     |     |     |     |
|     | grid # 1 | 111 | 89  | 88  | 89  | 89  | 89  | 70  |
| 72  |          |     |     |     |     |     |     |     |
|     | grid # 2 | 122 | 97  | 96  | 96  | 97  | 97  | 113 |
| 112 |          |     |     |     |     |     |     |     |
|     | grid # 3 | 261 | 184 | 183 | 182 | 184 | 185 | 214 |
| 211 |          |     |     |     |     |     |     |     |
|     | grid # 4 | 455 | 328 | 326 | 327 | 327 | 328 | 214 |
| 208 |          |     |     |     |     |     |     |     |



```

number of gridpoints:
  atom      H7      H8      H9      H10     C10     H11     H12
H13
  grid # 1   73      73      73      68      71      72      71
71
  grid # 2  118     118     118     106     79      109     111
110
  grid # 3  223     223     224     203     154     216     218
217
  grid # 4  223     224     224     199     290     216     220
219

```

```

number of gridpoints:
  atom      H14     H15     H16     H17    total
grid # 1    69      71      70      71    2860
grid # 2   110     110     108     111   3733
grid # 3   214     213     212     217   7195
grid # 4   207     211     209     217   9931

```

end of program grid

```

start of program rwr
end of program rwr

```

start of program scf

|      | i | u | d | i | g |                  | energy  | RMS     | maximum |
|------|---|---|---|---|---|------------------|---------|---------|---------|
|      | t | p | i | c | r |                  | change  | density | DIIS    |
|      | e | d | i | u | i | total energy     |         | change  | error   |
|      | r | t | s | t | d |                  |         |         |         |
| etot | 1 | N | N | 1 | U | -783.03312256433 |         | 2.8E-05 | 1.5E-03 |
| etot | 2 | Y | Y | 4 | M | -783.03327027113 | 1.5E-04 | 1.3E-05 | 5.8E-04 |
| etot | 3 | Y | Y | 4 | M | -783.03329103969 | 2.1E-05 | 3.9E-06 | 1.5E-04 |
| etot | 4 | Y | N | 4 | M | -783.03329273161 | 1.7E-06 | 0.0E+00 | 0.0E+00 |

Energy components, in hartrees:

```

(A) Nuclear repulsion..... 1415.52749517283
(E) Total one-electron terms..... -3875.56290036481
(I) Total two-electron terms..... 1677.00211246037
(L) Electronic energy..... -2198.56078790444 (E+I)
(N) Total energy..... -783.03329273161 (A+L)

```

```

SCFE: SCF energy: HF      -783.03329273161 hartrees  iterations:
4

```

HOMO energy: -0.30328

LUMO energy: 0.13260

Orbital energies:

|           |           |           |           |           |           |
|-----------|-----------|-----------|-----------|-----------|-----------|
| -20.52382 | -15.60085 | -11.34405 | -11.28708 | -11.25559 | -11.24869 |
| -11.24177 | -11.24025 | -11.24011 | -11.23985 | -11.23920 | -11.23596 |
| -11.23111 | -11.23110 | -11.22993 | -11.22890 | -11.22783 | -11.22650 |
| -11.22314 | -1.39465  | -1.26949  | -1.16523  | -1.14919  | -1.10750  |
| -1.03267  | -1.01982  | -1.01796  | -1.01126  | -0.96091  | -0.93318  |
| -0.85777  | -0.84806  | -0.83428  | -0.82046  | -0.79585  | -0.74170  |
| -0.71071  | -0.70020  | -0.67038  | -0.65048  | -0.64812  | -0.63592  |
| -0.63120  | -0.61540  | -0.61085  | -0.60162  | -0.59653  | -0.58309  |
| -0.58065  | -0.56484  | -0.54949  | -0.54501  | -0.53537  | -0.52339  |
| -0.52017  | -0.50685  | -0.49824  | -0.49592  | -0.48510  | -0.46987  |
| -0.46476  | -0.42092  | -0.40859  | -0.34194  | -0.33178  | -0.32295  |
| -0.30328  | 0.13260   | 0.13432   | 0.14416   | 0.14929   | 0.20787   |
| 0.23189   | 0.23798   | 0.24548   | 0.25996   | 0.28872   |           |

end of program scf

start of program derla

end of program derla

start of program rwr

end of program rwr

start of program der1b

forces (hartrees/bohr) : total

| atom | label | x             | y             | z             |
|------|-------|---------------|---------------|---------------|
| 1    | H1    | -1.941825E-05 | 3.282219E-06  | -9.680148E-05 |
| 2    | C1    | -8.285092E-05 | -5.758294E-05 | 1.460040E-04  |
| 3    | C2    | -1.277475E-05 | 4.401592E-05  | -1.925821E-04 |
| 4    | C3    | 1.395649E-05  | -4.789267E-05 | 1.002244E-05  |
| 5    | C4    | 1.358876E-04  | 2.394076E-05  | 1.411143E-04  |
| 6    | C5    | -6.660862E-06 | 4.130039E-05  | -1.382348E-05 |
| 7    | C6    | -4.454758E-05 | -3.629426E-06 | -1.633994E-04 |
| 8    | C7    | 5.509459E-05  | 6.319051E-05  | -1.119585E-05 |
| 9    | H3    | -2.159103E-05 | -2.933819E-05 | 2.936150E-05  |
| 10   | H4    | -7.877299E-05 | -4.204302E-05 | -1.872561E-05 |
| 11   | H6    | 1.085471E-05  | -2.641420E-05 | 1.207225E-04  |
| 12   | C16   | -6.476354E-04 | 3.148895E-06  | -3.226857E-04 |
| 13   | C8    | 2.007561E-06  | -1.247796E-05 | -1.196124E-04 |
| 14   | N2    | 4.908766E-05  | 6.878861E-05  | -3.375876E-05 |
| 15   | C9    | -5.827178E-04 | 7.181289E-05  | 1.458682E-04  |
| 16   | C11   | -1.015523E-04 | -1.662537E-04 | -1.997109E-04 |
| 17   | O1    | 1.854191E-04  | 2.418241E-05  | -2.865093E-04 |
| 18   | C18   | 4.474830E-04  | -4.196247E-05 | 3.216162E-04  |

|       |       |               |               |               |
|-------|-------|---------------|---------------|---------------|
| 19    | C19   | 1.522753E-04  | -5.294488E-04 | -6.617669E-05 |
| 20    | C20   | 6.154466E-04  | -3.835060E-04 | 2.430588E-04  |
| 21    | C21   | 2.712715E-04  | -4.611444E-04 | -2.279373E-04 |
| 22    | C22   | -7.356050E-05 | 3.923953E-04  | -5.230400E-05 |
| 23    | H2    | -3.236928E-04 | 3.462680E-04  | -1.237701E-04 |
| 24    | H5    | -2.275290E-04 | -1.409874E-04 | -1.953462E-04 |
| 25    | H7    | -6.294574E-04 | 2.604380E-04  | -1.173832E-04 |
| 26    | H8    | 5.272549E-04  | 3.251973E-04  | 3.826196E-04  |
| 27    | H9    | 1.288902E-04  | 1.354587E-04  | 1.147867E-04  |
| 28    | H10   | -7.684607E-06 | 7.751538E-05  | -1.971835E-05 |
| 29    | C10   | -5.673824E-05 | 2.082741E-05  | -5.304689E-05 |
| 30    | H11   | -5.201380E-05 | 9.993479E-06  | -2.341748E-05 |
| 31    | H12   | 1.897933E-05  | 4.857679E-05  | 5.081694E-05  |
| 32    | H13   | 6.479873E-05  | -8.475819E-05 | -5.595551E-06 |
| 33    | H14   | -1.880595E-05 | -1.073763E-06 | -6.258469E-05 |
| 34    | H15   | 5.874118E-04  | -2.268905E-04 | -1.203067E-04 |
| 35    | H16   | -1.109102E-04 | 3.684404E-05  | 9.348339E-05  |
| 36    | H17   | -7.911163E-05 | 3.786641E-04  | 2.379346E-04  |
| ----- |       | -----         | -----         | -----         |
|       | total | 8.809291E-05  | 1.204375E-04  | -4.889830E-04 |

end of program derlb

start of program geopt 11

geometry optimization step 11

reading input hessian of dimension 108  
in five columns format  
reading input hessian of dimension 108  
in five columns format  
reading input hessian of dimension 108  
in five columns format

energy change: 2.6884E-05 \* ( 5.0000E-05 )  
gradient maximum: 9.1225E-04 . ( 4.5000E-04 )  
gradient rms: 2.4166E-04 \* ( 3.0000E-04 )  
step size: 0.01254 trust radius: 0.30000  
displacement maximum: 7.0448E-03 . ( 1.8000E-03 )  
displacement rms: 1.1353E-03 \* ( 1.2000E-03 )  
predicted energy change: -8.4547E-06 geom step: 1.2539E-02  
full step: 1.2539E-02  
molecular structure not yet converged...

center of mass moved by:

x: -4.8367E-05 y: -5.2651E-04 z: -2.6388E-04

new geometry:

|      | angstroms    |              |               |
|------|--------------|--------------|---------------|
| atom | x            | y            | z             |
| H1   | 1.0850921747 | 1.8755092669 | -2.1965491526 |

|     |               |               |               |
|-----|---------------|---------------|---------------|
| C1  | 1.4062084941  | 1.7561832750  | -1.1757480190 |
| C2  | 2.2107414644  | 1.4390227011  | 1.4424643619  |
| C3  | 0.5908325386  | 1.0606464639  | -0.2993300924 |
| C4  | 2.6202450422  | 2.2863714590  | -0.7692810377 |
| C5  | 3.0155917584  | 2.1229057198  | 0.5450750098  |
| C6  | 0.9971866675  | 0.8997987549  | 1.0278528650  |
| C7  | -0.7358799662 | 0.4816714766  | -0.7412351434 |
| H3  | 3.2414331047  | 2.8186674605  | -1.4669534120 |
| H4  | 3.9507487703  | 2.5319220510  | 0.8851919339  |
| H6  | 2.5318722206  | 1.3372322341  | 2.4607356785  |
| C16 | -0.6487335495 | -0.9400533005 | -1.3004259650 |
| C8  | -1.7348645937 | 0.5756493316  | 0.4281495668  |
| N2  | 0.1816163428  | 0.1781162701  | 1.9266990222  |
| C9  | -1.1620060914 | -0.0006065178 | 1.7099397489  |
| C11 | 0.7425796804  | -0.3207253042 | 3.1737208278  |
| O1  | -1.8662809930 | -0.5501900183 | 2.5096769158  |
| C18 | -0.6296527091 | -3.5393536757 | -2.3380197500 |
| C19 | -1.6584645146 | -1.3792395652 | -2.1550052528 |
| C20 | 0.3736582472  | -1.8237856179 | -0.9816777131 |
| C21 | 0.3808893530  | -3.1138997153 | -1.4942937983 |
| C22 | -1.6528728102 | -2.6632812423 | -2.6694371587 |
| H2  | -2.4569640336 | -0.7067872126 | -2.4217729234 |
| H5  | 1.1753712384  | -1.5107798074 | -0.3386804980 |
| H7  | 1.1818385524  | -3.7828989873 | -1.2328996715 |
| H8  | -2.4425309275 | -2.9786884907 | -3.3292818919 |
| H9  | -0.6208387087 | -4.5387043468 | -2.7364236117 |
| H10 | -1.1200077115 | 1.1079514568  | -1.5409814595 |
| C10 | -2.2056561335 | 2.0148901111  | 0.6922576077  |
| H11 | -1.3767312470 | 2.6777121073  | 0.9166561551  |
| H12 | -2.8966049060 | 2.0341262970  | 1.5273170640  |
| H13 | -2.7182971815 | 2.4033646089  | -0.1821731818 |
| H14 | -2.6038873813 | -0.0330943690 | 0.2154008615  |
| H15 | 1.7007590981  | -0.7863838725 | 2.9806499142  |
| H16 | 0.0626423160  | -1.0484296711 | 3.5816071177  |
| H17 | 0.8755339950  | 0.4765268612  | 3.8983337576  |

nuclear repulsion energy..... 1415.606883182 hartrees

-----  
 / end of geometry optimization iteration 11 /  
 -----

end of program geopt

start of program onee

smallest eigenvalue of S: 3.349E-04

number of canonical orbitals..... 368

end of program onee

start of program probe

end of program probe

start of program grid

number of gridpoints:

| atom     | H1  | C1  | C2  | C3  | C4  | C5  | C6  |
|----------|-----|-----|-----|-----|-----|-----|-----|
| C7       |     |     |     |     |     |     |     |
| grid # 1 | 72  | 85  | 88  | 88  | 89  | 87  | 83  |
| 81       |     |     |     |     |     |     |     |
| grid # 2 | 116 | 95  | 95  | 98  | 97  | 97  | 95  |
| 90       |     |     |     |     |     |     |     |
| grid # 3 | 215 | 182 | 183 | 195 | 181 | 183 | 192 |
| 171      |     |     |     |     |     |     |     |
| grid # 4 | 215 | 326 | 327 | 336 | 326 | 326 | 324 |
| 315      |     |     |     |     |     |     |     |

number of gridpoints:

| atom     | H3  | H4  | H6  | C16 | C8  | N2  | C9  |
|----------|-----|-----|-----|-----|-----|-----|-----|
| C11      |     |     |     |     |     |     |     |
| grid # 1 | 73  | 73  | 71  | 90  | 82  | 95  | 81  |
| 70       |     |     |     |     |     |     |     |
| grid # 2 | 118 | 118 | 112 | 100 | 90  | 104 | 90  |
| 79       |     |     |     |     |     |     |     |
| grid # 3 | 223 | 223 | 207 | 198 | 174 | 212 | 176 |
| 143      |     |     |     |     |     |     |     |
| grid # 4 | 224 | 223 | 207 | 342 | 312 | 390 | 293 |
| 273      |     |     |     |     |     |     |     |

number of gridpoints:

| atom     | O1  | C18 | C19 | C20 | C21 | C22 | H2  |
|----------|-----|-----|-----|-----|-----|-----|-----|
| H5       |     |     |     |     |     |     |     |
| grid # 1 | 111 | 89  | 88  | 89  | 89  | 89  | 70  |
| 72       |     |     |     |     |     |     |     |
| grid # 2 | 122 | 97  | 96  | 96  | 97  | 97  | 113 |
| 112      |     |     |     |     |     |     |     |
| grid # 3 | 261 | 184 | 183 | 182 | 184 | 185 | 215 |
| 211      |     |     |     |     |     |     |     |
| grid # 4 | 455 | 328 | 326 | 327 | 327 | 328 | 214 |
| 208      |     |     |     |     |     |     |     |

number of gridpoints:

| atom     | H7  | H8  | H9  | H10 | C10 | H11 | H12 |
|----------|-----|-----|-----|-----|-----|-----|-----|
| H13      |     |     |     |     |     |     |     |
| grid # 1 | 73  | 73  | 73  | 68  | 71  | 72  | 71  |
| 71       |     |     |     |     |     |     |     |
| grid # 2 | 118 | 118 | 118 | 106 | 79  | 109 | 111 |
| 110      |     |     |     |     |     |     |     |
| grid # 3 | 222 | 223 | 224 | 202 | 154 | 216 | 218 |
| 217      |     |     |     |     |     |     |     |
| grid # 4 | 223 | 224 | 224 | 199 | 290 | 216 | 220 |
| 219      |     |     |     |     |     |     |     |

number of gridpoints:

|          | atom | H14 | H15 | H16 | H17 | total |
|----------|------|-----|-----|-----|-----|-------|
| grid # 1 |      | 69  | 71  | 70  | 71  | 2858  |
| grid # 2 |      | 110 | 110 | 108 | 111 | 3732  |
| grid # 3 |      | 214 | 213 | 212 | 217 | 7195  |
| grid # 4 |      | 207 | 211 | 209 | 218 | 9932  |

end of program grid

start of program rwr  
end of program rwr

start of program scf

|      | i | u | d | i | g |                  | RMS     | maximum |
|------|---|---|---|---|---|------------------|---------|---------|
|      | t | p | i | c | r |                  | energy  | DIIS    |
|      | e | d | i | u | i | total energy     | density | error   |
|      | r | t | s | t | d |                  | change  |         |
| etot | 1 | N | N | 1 | U | -783.03321849990 | 2.1E-05 | 1.2E-03 |
| etot | 2 | Y | Y | 4 | M | -783.03329566222 | 7.7E-05 | 4.6E-04 |
| etot | 3 | Y | Y | 4 | M | -783.03330659391 | 1.1E-05 | 1.2E-04 |
| etot | 4 | Y | N | 4 | M | -783.03330700609 | 4.1E-07 | 0.0E+00 |

Energy components, in hartrees:

|     |                               |                   |       |
|-----|-------------------------------|-------------------|-------|
| (A) | Nuclear repulsion.....        | 1415.60688318196  |       |
| (E) | Total one-electron terms..... | -3875.71614818851 |       |
| (I) | Total two-electron terms..... | 1677.07595800046  |       |
| (L) | Electronic energy.....        | -2198.64019018805 | (E+I) |
| (N) | Total energy.....             | -783.03330700609  | (A+L) |

SCFE: SCF energy: HF -783.03330700609 hartrees iterations:  
4

HOMO energy: -0.30332  
LUMO energy: 0.13259

Orbital energies:

|           |           |           |           |           |           |
|-----------|-----------|-----------|-----------|-----------|-----------|
| -20.52366 | -15.60107 | -11.34422 | -11.28712 | -11.25586 | -11.24895 |
| -11.24186 | -11.24040 | -11.24034 | -11.23993 | -11.23924 | -11.23590 |
| -11.23099 | -11.23078 | -11.22961 | -11.22897 | -11.22746 | -11.22669 |
| -11.22318 | -1.39478  | -1.26955  | -1.16534  | -1.14924  | -1.10758  |
| -1.03271  | -1.01977  | -1.01809  | -1.01131  | -0.96088  | -0.93324  |
| -0.85781  | -0.84804  | -0.83437  | -0.82049  | -0.79594  | -0.74171  |
| -0.71074  | -0.70030  | -0.67043  | -0.65046  | -0.64815  | -0.63596  |
| -0.63138  | -0.61538  | -0.61089  | -0.60160  | -0.59663  | -0.58316  |
| -0.58076  | -0.56482  | -0.54945  | -0.54503  | -0.53545  | -0.52345  |
| -0.52020  | -0.50687  | -0.49831  | -0.49598  | -0.48520  | -0.46999  |

|          |          |          |          |          |          |
|----------|----------|----------|----------|----------|----------|
| -0.46481 | -0.42095 | -0.40859 | -0.34195 | -0.33186 | -0.32295 |
| -0.30332 | 0.13259  | 0.13439  | 0.14410  | 0.14930  | 0.20785  |
| 0.23183  | 0.23802  | 0.24543  | 0.25992  | 0.28875  |          |

end of program scf

start of program derla  
end of program derla

start of program rwr  
end of program rwr

start of program derlb

forces (hartrees/bohr) : total

| atom | label | x             | y             | z             |
|------|-------|---------------|---------------|---------------|
| 1    | H1    | 1.509999E-05  | -7.166566E-06 | -7.375450E-06 |
| 2    | C1    | -1.403193E-04 | -7.425558E-05 | -1.456735E-06 |
| 3    | C2    | 2.891177E-05  | 3.333228E-05  | 2.212443E-05  |
| 4    | C3    | 5.810907E-05  | 6.259614E-05  | -1.335858E-04 |
| 5    | C4    | -1.226377E-06 | 3.282838E-05  | -9.614432E-05 |
| 6    | C5    | 1.949114E-05  | -1.214762E-05 | 1.645793E-04  |
| 7    | C6    | -1.303579E-05 | -4.555087E-05 | 5.104680E-05  |
| 8    | C7    | -3.656073E-06 | 3.408986E-05  | -9.098707E-05 |
| 9    | H3    | 6.914848E-06  | -2.595601E-06 | 1.331269E-06  |
| 10   | H4    | -2.452959E-05 | 6.190777E-06  | 1.587383E-05  |
| 11   | H6    | -1.101237E-05 | 9.965392E-06  | 2.318363E-05  |
| 12   | C16   | -1.159350E-04 | -1.338367E-04 | -1.735098E-04 |
| 13   | C8    | 1.103544E-05  | -5.062353E-05 | 2.676686E-05  |
| 14   | N2    | -1.495481E-04 | 1.293956E-04  | -1.584863E-04 |
| 15   | C9    | 1.120058E-05  | 1.006810E-04  | -1.247190E-04 |
| 16   | C11   | -3.003755E-06 | -2.935590E-05 | -2.876516E-05 |
| 17   | O1    | -5.946309E-05 | -6.440490E-05 | 5.928270E-05  |
| 18   | C18   | 1.593486E-04  | -1.018583E-04 | 1.158859E-04  |
| 19   | C19   | 1.961710E-04  | -5.289651E-05 | 9.435458E-05  |
| 20   | C20   | 1.015188E-04  | 5.094383E-05  | 1.065040E-04  |
| 21   | C21   | -1.078614E-04 | 1.203866E-04  | -9.521991E-05 |
| 22   | C22   | -2.206124E-04 | 1.774589E-04  | -1.073953E-04 |
| 23   | H2    | -6.011433E-05 | 4.339600E-05  | -4.340501E-05 |
| 24   | H5    | -1.329612E-04 | -8.864390E-05 | -2.088062E-04 |
| 25   | H7    | 1.944857E-04  | -1.209150E-04 | 1.712234E-05  |
| 26   | H8    | 9.438265E-05  | 4.520749E-05  | 1.198306E-04  |
| 27   | H9    | 5.751088E-05  | 2.061737E-05  | 3.817543E-05  |
| 28   | H10   | 2.725181E-05  | -9.019331E-06 | -3.575937E-06 |
| 29   | C10   | 6.106522E-05  | 4.533285E-05  | -5.117092E-06 |
| 30   | H11   | -8.322761E-05 | -6.001878E-05 | -2.800072E-05 |
| 31   | H12   | -1.531791E-05 | -2.247368E-06 | -2.468381E-05 |

|       |       |               |               |               |
|-------|-------|---------------|---------------|---------------|
| 32    | H13   | 1.282610E-05  | -6.343599E-06 | -3.751185E-05 |
| 33    | H14   | 3.642051E-05  | 2.575478E-05  | -2.038058E-05 |
| 34    | H15   | 1.302203E-04  | -6.595604E-05 | 2.625067E-05  |
| 35    | H16   | -1.722664E-05 | 1.717204E-05  | -5.038503E-05 |
| 36    | H17   | 1.170832E-05  | 1.034583E-04  | 9.846561E-05  |
| ----- |       | -----         | -----         | -----         |
|       | total | 7.462175E-05  | 1.309715E-04  | -4.587332E-04 |

end of program derlb

start of program geopt 12

geometry optimization step 12

reading input hessian of dimension 108

in five columns format

reading input hessian of dimension 108

in five columns format

reading input hessian of dimension 108

in five columns format

energy change: -1.4274E-05 \* ( 5.0000E-05 )  
 gradient maximum: 3.4943E-04 \* ( 4.5000E-04 )  
 gradient rms: 9.7502E-05 \* ( 3.0000E-04 )  
 step size: 0.01215 trust radius: 0.30000  
 displacement maximum: 6.4824E-03 . ( 1.8000E-03 )  
 displacement rms: 1.1001E-03 \* ( 1.2000E-03 )  
 predicted energy change: -2.9212E-06 geom step: 1.2151E-02  
 full step: 1.2151E-02  
 molecular structure not yet converged...

center of mass moved by:

x: -1.1589E-04 y: -1.1907E-04 z: -3.1836E-05

new geometry:

| atom | angstroms     |               |               |
|------|---------------|---------------|---------------|
|      | x             | y             | z             |
| H1   | 1.0874210424  | 1.8726767496  | -2.1966991144 |
| C1   | 1.4076359920  | 1.7540999189  | -1.1754995990 |
| C2   | 2.2103285271  | 1.4387751651  | 1.4439686467  |
| C3   | 0.5912764872  | 1.0599023605  | -0.2990633807 |
| C4   | 2.6219041800  | 2.2838036755  | -0.7684423765 |
| C5   | 3.0162712937  | 2.1212029846  | 0.5465915142  |
| C6   | 0.9967209296  | 0.8999135351  | 1.0286616086  |
| C7   | -0.7354993908 | 0.4814207670  | -0.7414582660 |
| H3   | 3.2440602389  | 2.8149272315  | -1.4661033227 |
| H4   | 3.9515230447  | 2.5296883924  | 0.8870317539  |
| H6   | 2.5306265263  | 1.3376562691  | 2.4626884508  |
| C16  | -0.6488642525 | -0.9405067797 | -1.3004612889 |
| C8   | -1.7350603205 | 0.5762468038  | 0.4274478761  |
| N2   | 0.1802059148  | 0.1799571870  | 1.9277439932  |



|     |               |               |               |
|-----|---------------|---------------|---------------|
| C9  | -1.1631142305 | 0.0002261902  | 1.7096522898  |
| C11 | 0.7407712436  | -0.3187777428 | 3.1754314820  |
| O1  | -1.8674313305 | -0.5502941385 | 2.5086197635  |
| C18 | -0.6290397822 | -3.5386971162 | -2.3394572890 |
| C19 | -1.6620976799 | -1.3813001863 | -2.1496964508 |
| C20 | 0.3776318664  | -1.8218464172 | -0.9875696398 |
| C21 | 0.3852029406  | -3.1116046247 | -1.5010657650 |
| C22 | -1.6558386849 | -2.6646009134 | -2.6648769058 |
| H2  | -2.4642945806 | -0.7105462511 | -2.4114926087 |
| H5  | 1.1817007206  | -1.5076590403 | -0.3486755518 |
| H7  | 1.1887025207  | -3.7791158002 | -1.2444160942 |
| H8  | -2.4477505584 | -2.9809918803 | -3.3205967377 |
| H9  | -0.6198143721 | -4.5376904945 | -2.7384639337 |
| H10 | -1.1188644550 | 1.1076849813  | -1.5415494224 |
| C10 | -2.2053928127 | 2.0156943455  | 0.6909939541  |
| H11 | -1.3765561397 | 2.6781177713  | 0.9160791304  |
| H12 | -2.8970224903 | 2.0355085022  | 1.5254430647  |
| H13 | -2.7168370781 | 2.4041393531  | -0.1840580421 |
| H14 | -2.6042485323 | -0.0320723470 | 0.2144327156  |
| H15 | 1.7018027076  | -0.7803438692 | 2.9851117766  |
| H16 | 0.0626661868  | -1.0498218587 | 3.5797933091  |
| H17 | 0.8680497495  | 0.4778617252  | 3.9021196640  |

nuclear repulsion energy..... 1415.566492597 hartrees

-----  
 / end of geometry optimization iteration 12 /  
 -----

end of program geopt

start of program onee  
 smallest eigenvalue of S: 3.352E-04  
 number of canonical orbitals..... 368  
 end of program onee

start of program probe  
 end of program probe

start of program grid

number of gridpoints:

| atom     | H1  | C1  | C2  | C3  | C4  | C5  | C6  |
|----------|-----|-----|-----|-----|-----|-----|-----|
| C7       |     |     |     |     |     |     |     |
| grid # 1 | 72  | 85  | 88  | 88  | 89  | 87  | 84  |
| 81       |     |     |     |     |     |     |     |
| grid # 2 | 116 | 95  | 95  | 98  | 97  | 97  | 95  |
| 90       |     |     |     |     |     |     |     |
| grid # 3 | 215 | 182 | 183 | 194 | 181 | 183 | 192 |
| 171      |     |     |     |     |     |     |     |

|          |     |     |     |     |     |     |     |
|----------|-----|-----|-----|-----|-----|-----|-----|
| grid # 4 | 215 | 326 | 327 | 336 | 326 | 326 | 324 |
|----------|-----|-----|-----|-----|-----|-----|-----|

315

number of gridpoints:

|      |    |    |    |     |    |    |    |
|------|----|----|----|-----|----|----|----|
| atom | H3 | H4 | H6 | C16 | C8 | N2 | C9 |
|------|----|----|----|-----|----|----|----|

C11

|          |    |    |    |    |    |    |    |
|----------|----|----|----|----|----|----|----|
| grid # 1 | 73 | 73 | 70 | 90 | 82 | 95 | 81 |
|----------|----|----|----|----|----|----|----|

69

|          |     |     |     |     |    |     |    |
|----------|-----|-----|-----|-----|----|-----|----|
| grid # 2 | 118 | 118 | 112 | 100 | 90 | 105 | 90 |
|----------|-----|-----|-----|-----|----|-----|----|

80

|          |     |     |     |     |     |     |     |
|----------|-----|-----|-----|-----|-----|-----|-----|
| grid # 3 | 223 | 223 | 207 | 198 | 174 | 212 | 176 |
|----------|-----|-----|-----|-----|-----|-----|-----|

144

|          |     |     |     |     |     |     |     |
|----------|-----|-----|-----|-----|-----|-----|-----|
| grid # 4 | 224 | 223 | 207 | 342 | 312 | 390 | 293 |
|----------|-----|-----|-----|-----|-----|-----|-----|

272

number of gridpoints:

|      |    |     |     |     |     |     |    |
|------|----|-----|-----|-----|-----|-----|----|
| atom | O1 | C18 | C19 | C20 | C21 | C22 | H2 |
|------|----|-----|-----|-----|-----|-----|----|

H5

|          |     |    |    |    |    |    |    |
|----------|-----|----|----|----|----|----|----|
| grid # 1 | 111 | 89 | 88 | 89 | 89 | 89 | 70 |
|----------|-----|----|----|----|----|----|----|

72

|          |     |    |    |    |    |    |     |
|----------|-----|----|----|----|----|----|-----|
| grid # 2 | 122 | 97 | 96 | 96 | 97 | 97 | 113 |
|----------|-----|----|----|----|----|----|-----|

112

|          |     |     |     |     |     |     |     |
|----------|-----|-----|-----|-----|-----|-----|-----|
| grid # 3 | 261 | 184 | 183 | 182 | 184 | 185 | 214 |
|----------|-----|-----|-----|-----|-----|-----|-----|

211

|          |     |     |     |     |     |     |     |
|----------|-----|-----|-----|-----|-----|-----|-----|
| grid # 4 | 455 | 328 | 326 | 327 | 327 | 328 | 214 |
|----------|-----|-----|-----|-----|-----|-----|-----|

208

number of gridpoints:

|      |    |    |    |     |     |     |     |
|------|----|----|----|-----|-----|-----|-----|
| atom | H7 | H8 | H9 | H10 | C10 | H11 | H12 |
|------|----|----|----|-----|-----|-----|-----|

H13

|          |    |    |    |    |    |    |    |
|----------|----|----|----|----|----|----|----|
| grid # 1 | 73 | 73 | 73 | 68 | 71 | 72 | 71 |
|----------|----|----|----|----|----|----|----|

71

|          |     |     |     |     |    |     |     |
|----------|-----|-----|-----|-----|----|-----|-----|
| grid # 2 | 118 | 118 | 118 | 106 | 79 | 109 | 111 |
|----------|-----|-----|-----|-----|----|-----|-----|

110

|          |     |     |     |     |     |     |     |
|----------|-----|-----|-----|-----|-----|-----|-----|
| grid # 3 | 222 | 223 | 224 | 202 | 154 | 216 | 218 |
|----------|-----|-----|-----|-----|-----|-----|-----|

217

|          |     |     |     |     |     |     |     |
|----------|-----|-----|-----|-----|-----|-----|-----|
| grid # 4 | 223 | 224 | 224 | 199 | 290 | 216 | 220 |
|----------|-----|-----|-----|-----|-----|-----|-----|

219

number of gridpoints:

|          |     |     |     |     |       |
|----------|-----|-----|-----|-----|-------|
| atom     | H14 | H15 | H16 | H17 | total |
| grid # 1 | 69  | 71  | 70  | 71  | 2857  |
| grid # 2 | 110 | 111 | 108 | 111 | 3735  |
| grid # 3 | 214 | 213 | 212 | 217 | 7194  |
| grid # 4 | 207 | 211 | 209 | 218 | 9931  |

end of program grid

start of program rwr

end of program rwr

start of program scf

|      | i | u | d | i | g |                  | energy  | RMS     | maximum |
|------|---|---|---|---|---|------------------|---------|---------|---------|
|      | t | p | i | c | r |                  | change  | density | DIIS    |
|      | e | d | i | u | i | total energy     |         | change  | error   |
|      | r | t | s | t | d |                  |         |         |         |
| etot | 1 | N | N | 1 | U | -783.03322765343 |         | 1.8E-05 | 9.3E-04 |
| etot | 2 | Y | Y | 4 | M | -783.03329023255 | 6.3E-05 | 8.9E-06 | 3.7E-04 |
| etot | 3 | Y | Y | 4 | M | -783.03329907979 | 8.8E-06 | 2.7E-06 | 8.7E-05 |
| etot | 4 | Y | N | 4 | M | -783.03329941947 | 3.4E-07 | 0.0E+00 | 0.0E+00 |

Energy components, in hartrees:

|     |                               |                   |       |
|-----|-------------------------------|-------------------|-------|
| (A) | Nuclear repulsion.....        | 1415.56649259695  |       |
| (E) | Total one-electron terms..... | -3875.64246018074 |       |
| (I) | Total two-electron terms..... | 1677.04266816433  |       |
| (L) | Electronic energy.....        | -2198.59979201642 | (E+I) |
| (N) | Total energy.....             | -783.03329941947  | (A+L) |

SCFE: SCF energy: HF -783.03329941947 hartrees iterations:  
4

HOMO energy: -0.30318  
LUMO energy: 0.13267

Orbital energies:

|           |           |           |           |           |           |
|-----------|-----------|-----------|-----------|-----------|-----------|
| -20.52393 | -15.60085 | -11.34405 | -11.28698 | -11.25592 | -11.24868 |
| -11.24161 | -11.24025 | -11.24006 | -11.23997 | -11.23917 | -11.23593 |
| -11.23110 | -11.23076 | -11.22969 | -11.22884 | -11.22761 | -11.22651 |
| -11.22312 | -1.39481  | -1.26939  | -1.16523  | -1.14917  | -1.10751  |
| -1.03267  | -1.01967  | -1.01804  | -1.01132  | -0.96077  | -0.93318  |
| -0.85777  | -0.84802  | -0.83428  | -0.82041  | -0.79593  | -0.74163  |
| -0.71067  | -0.70030  | -0.67037  | -0.65039  | -0.64807  | -0.63591  |
| -0.63127  | -0.61536  | -0.61085  | -0.60151  | -0.59660  | -0.58321  |
| -0.58076  | -0.56480  | -0.54943  | -0.54506  | -0.53544  | -0.52341  |
| -0.52012  | -0.50680  | -0.49830  | -0.49591  | -0.48524  | -0.46984  |
| -0.46475  | -0.42092  | -0.40859  | -0.34191  | -0.33188  | -0.32288  |
| -0.30318  | 0.13267   | 0.13438   | 0.14427   | 0.14926   | 0.20793   |
| 0.23188   | 0.23799   | 0.24559   | 0.25997   | 0.28875   |           |

end of program scf

start of program derla  
end of program derla

start of program rwr  
end of program rwr

start of program der1b

forces (hartrees/bohr) : total

| atom  | label | x             | y             | z             |
|-------|-------|---------------|---------------|---------------|
| 1     | H1    | 9.550775E-06  | 1.862100E-06  | 1.298185E-05  |
| 2     | C1    | 1.662934E-04  | 7.107516E-05  | 4.409654E-05  |
| 3     | C2    | -4.674395E-06 | 1.422456E-05  | -3.297492E-05 |
| 4     | C3    | 1.546377E-06  | 1.406442E-05  | 9.740599E-07  |
| 5     | C4    | -4.441744E-05 | -5.447015E-05 | 9.556775E-05  |
| 6     | C5    | -4.772277E-05 | 2.057467E-05  | -1.158832E-04 |
| 7     | C6    | 4.498130E-05  | 8.357123E-05  | 4.897321E-05  |
| 8     | C7    | -1.433647E-05 | 3.448997E-05  | 5.589411E-05  |
| 9     | H3    | -1.201905E-05 | 1.738134E-06  | 1.251113E-05  |
| 10    | H4    | -5.282050E-05 | 1.168636E-05  | -1.582899E-05 |
| 11    | H6    | -7.004268E-05 | 2.650758E-05  | -9.432683E-05 |
| 12    | C16   | 1.946571E-04  | 1.085630E-04  | 4.823569E-05  |
| 13    | C8    | -1.231475E-06 | 3.047010E-05  | -1.146627E-05 |
| 14    | N2    | 1.825481E-04  | -6.266563E-05 | -4.263682E-05 |
| 15    | C9    | 1.316198E-04  | -4.674712E-05 | -7.785811E-05 |
| 16    | C11   | -3.344721E-05 | 1.338571E-04  | -2.567368E-05 |
| 17    | O1    | -1.441563E-04 | -5.546408E-05 | 1.069490E-04  |
| 18    | C18   | 2.797816E-04  | -9.327861E-06 | 1.327460E-04  |
| 19    | C19   | -9.724024E-05 | 2.700472E-04  | 1.468340E-05  |
| 20    | C20   | -1.903934E-04 | -8.996130E-05 | -6.072091E-05 |
| 21    | C21   | -3.568953E-04 | 1.065918E-04  | -1.241310E-04 |
| 22    | C22   | -2.132966E-05 | -1.139713E-04 | -9.135987E-05 |
| 23    | H2    | 2.599133E-04  | -1.220062E-04 | -2.101710E-05 |
| 24    | H5    | 2.928700E-05  | 5.617728E-05  | -3.449616E-06 |
| 25    | H7    | 2.511586E-04  | -1.538301E-04 | 9.375142E-05  |
| 26    | H8    | -1.690819E-04 | -9.523210E-05 | -1.515919E-04 |
| 27    | H9    | 5.057564E-06  | 1.684253E-05  | 7.343854E-06  |
| 28    | H10   | 8.823075E-06  | 1.402141E-05  | -1.899764E-05 |
| 29    | C10   | 3.579292E-05  | 1.881099E-06  | -2.891656E-05 |
| 30    | H11   | 1.550717E-05  | -1.902495E-06 | -2.175905E-05 |
| 31    | H12   | -3.390043E-05 | -2.138714E-05 | -4.421409E-05 |
| 32    | H13   | -3.275867E-05 | 2.412945E-05  | -4.280185E-05 |
| 33    | H14   | 2.475856E-05  | -7.999042E-06 | -7.114919E-06 |
| 34    | H15   | -1.620322E-04 | 5.566123E-05  | -1.237246E-04 |
| 35    | H16   | -8.933291E-05 | -9.802103E-05 | 8.553860E-05  |
| 36    | H17   | 1.201349E-05  | -9.911158E-06 | -6.546425E-05 |
| total |       | 7.545714E-05  | 1.551397E-04  | -4.616655E-04 |

end of program der1b

start of program geopt 13

geometry optimization step 13  
reading input hessian of dimension 108  
in five columns format  
reading input hessian of dimension 108  
in five columns format  
reading input hessian of dimension 108  
in five columns format

energy change: 7.5866E-06 \* ( 5.0000E-05 )  
gradient maximum: 4.4609E-04 \* ( 4.5000E-04 )  
gradient rms: 1.0872E-04 \* ( 3.0000E-04 )  
step size: 0.00807 trust radius: 0.30000  
displacement maximum: 3.8703E-03 . ( 1.8000E-03 )  
displacement rms: 7.3097E-04 \* ( 1.2000E-03 )  
predicted energy change: -2.7443E-06 geom step: 8.0738E-  
03 full step: 8.0738E-03  
molecular structure not yet converged...

center of mass moved by:  
x: 7.9464E-05 y: 1.4919E-04 z: -1.7791E-05

new geometry:

|      | angstroms     |               |               |
|------|---------------|---------------|---------------|
| atom | x             | y             | z             |
| H1   | 1.0873225631  | 1.8740356996  | -2.1967669431 |
| C1   | 1.4075695345  | 1.7553611321  | -1.1756107630 |
| C2   | 2.2101040554  | 1.4399897819  | 1.4437134769  |
| C3   | 0.5915520537  | 1.0604036397  | -0.2994389538 |
| C4   | 2.6213261882  | 2.2858706647  | -0.7683551621 |
| C5   | 3.0155548813  | 2.1234394678  | 0.5466161693  |
| C6   | 0.9970522390  | 0.9002002060  | 1.0281998385  |
| C7   | -0.7351322176 | 0.4816902848  | -0.7417311644 |
| H3   | 3.2431590682  | 2.8176725195  | -1.4658220860 |
| H4   | 3.9503053051  | 2.5328687283  | 0.8872974977  |
| H6   | 2.5302626680  | 1.3389041983  | 2.4624047894  |
| C16  | -0.6484959760 | -0.9402089407 | -1.3007668137 |
| C8   | -1.7345167883 | 0.5757891140  | 0.4273753836  |
| N2   | 0.1811219234  | 0.1787728055  | 1.9267531824  |
| C9   | -1.1623142954 | -0.0004615067 | 1.7093620875  |
| C11  | 0.7420434031  | -0.3206752566 | 3.1736974990  |
| O1   | -1.8666783392 | -0.5505674831 | 2.5086633502  |
| C18  | -0.6305239831 | -3.5395893382 | -2.3376767482 |
| C19  | -1.6602117605 | -1.3801387888 | -2.1523732841 |
| C20  | 0.3754361970  | -1.8230566344 | -0.9847378891 |
| C21  | 0.3823758086  | -3.1132267411 | -1.4972317720 |
| C22  | -1.6556219849 | -2.6643026021 | -2.6662515461 |
| H2   | -2.4597582434 | -0.7081919123 | -2.4171713098 |
| H5   | 1.1786085483  | -1.5094515363 | -0.3442970198 |
| H7   | 1.1852665442  | -3.7814504098 | -1.2384040781 |
| H8   | -2.4471352063 | -2.9803861643 | -3.3234029244 |
| H9   | -0.6220109882 | -4.5389617150 | -2.7358466293 |

|     |               |               |               |
|-----|---------------|---------------|---------------|
| H10 | -1.1187866345 | 1.1080633130  | -1.5415617356 |
| C10 | -2.2053318367 | 2.0149009697  | 0.6914469162  |
| H11 | -1.3768830654 | 2.6771113800  | 0.9182989018  |
| H12 | -2.8981092585 | 2.0336413654  | 1.5249667325  |
| H13 | -2.7158621653 | 2.4042321355  | -0.1838458554 |
| H14 | -2.6034300371 | -0.0328235863 | 0.2142993913  |
| H15 | 1.7014266015  | -0.7846075109 | 2.9812736927  |
| H16 | 0.0627323523  | -1.0499434529 | 3.5796876660  |
| H17 | 0.8728444505  | 0.4758884026  | 3.8997402002  |

nuclear repulsion energy..... 1415.593187634 hartrees

-----  
 / end of geometry optimization iteration 13 /  
 -----

end of program geopt

start of program onee  
 smallest eigenvalue of S: 3.351E-04  
 number of canonical orbitals..... 368  
 end of program onee

start of program probe  
 end of program probe

start of program grid

number of gridpoints:

| atom     | H1  | C1  | C2  | C3  | C4  | C5  | C6  |
|----------|-----|-----|-----|-----|-----|-----|-----|
| C7       |     |     |     |     |     |     |     |
| grid # 1 | 72  | 85  | 88  | 88  | 89  | 87  | 84  |
| 81       |     |     |     |     |     |     |     |
| grid # 2 | 116 | 95  | 95  | 98  | 97  | 97  | 95  |
| 90       |     |     |     |     |     |     |     |
| grid # 3 | 215 | 182 | 183 | 194 | 181 | 183 | 192 |
| 171      |     |     |     |     |     |     |     |
| grid # 4 | 215 | 326 | 327 | 336 | 326 | 326 | 324 |
| 315      |     |     |     |     |     |     |     |

number of gridpoints:

| atom     | H3  | H4  | H6  | C16 | C8  | N2  | C9  |
|----------|-----|-----|-----|-----|-----|-----|-----|
| C11      |     |     |     |     |     |     |     |
| grid # 1 | 73  | 73  | 70  | 90  | 82  | 95  | 81  |
| 70       |     |     |     |     |     |     |     |
| grid # 2 | 118 | 118 | 112 | 100 | 90  | 105 | 90  |
| 80       |     |     |     |     |     |     |     |
| grid # 3 | 223 | 223 | 207 | 198 | 174 | 212 | 176 |
| 143      |     |     |     |     |     |     |     |

grid # 4      224      223      207      342      312      390      293  
272

number of gridpoints:

|          |     |     |     |     |     |     |     |
|----------|-----|-----|-----|-----|-----|-----|-----|
| atom     | 01  | C18 | C19 | C20 | C21 | C22 | H2  |
| H5       |     |     |     |     |     |     |     |
| grid # 1 | 111 | 89  | 88  | 89  | 89  | 89  | 70  |
| 72       |     |     |     |     |     |     |     |
| grid # 2 | 122 | 97  | 96  | 96  | 97  | 97  | 113 |
| 112      |     |     |     |     |     |     |     |
| grid # 3 | 261 | 184 | 183 | 182 | 184 | 185 | 214 |
| 211      |     |     |     |     |     |     |     |
| grid # 4 | 455 | 328 | 326 | 327 | 327 | 328 | 214 |
| 208      |     |     |     |     |     |     |     |

number of gridpoints:

|          |     |     |     |     |     |     |     |
|----------|-----|-----|-----|-----|-----|-----|-----|
| atom     | H7  | H8  | H9  | H10 | C10 | H11 | H12 |
| H13      |     |     |     |     |     |     |     |
| grid # 1 | 73  | 73  | 73  | 68  | 71  | 72  | 71  |
| 71       |     |     |     |     |     |     |     |
| grid # 2 | 118 | 118 | 118 | 106 | 79  | 109 | 111 |
| 110      |     |     |     |     |     |     |     |
| grid # 3 | 223 | 223 | 224 | 202 | 156 | 216 | 218 |
| 217      |     |     |     |     |     |     |     |
| grid # 4 | 223 | 224 | 224 | 199 | 290 | 216 | 220 |
| 219      |     |     |     |     |     |     |     |

number of gridpoints:

|          |     |     |     |     |       |
|----------|-----|-----|-----|-----|-------|
| atom     | H14 | H15 | H16 | H17 | total |
| grid # 1 | 69  | 71  | 70  | 71  | 2858  |
| grid # 2 | 110 | 110 | 108 | 111 | 3734  |
| grid # 3 | 214 | 213 | 212 | 217 | 7196  |
| grid # 4 | 207 | 211 | 209 | 218 | 9931  |

end of program grid

start of program rwr

end of program rwr

start of program scf

|      | i | u | d | i | g |                  | RMS      | maximum |         |
|------|---|---|---|---|---|------------------|----------|---------|---------|
|      | t | p | i | c | r |                  | density  | DIIS    |         |
|      | e | d | i | u | i | energy           | change   | error   |         |
|      | r | t | s | t | d | total energy     | change   |         |         |
| etot | 1 | N | N | 1 | U | -783.03328122289 |          | 1.2E-05 | 4.5E-04 |
| etot | 2 | Y | Y | 4 | M | -783.03330080026 | 2.0E-05  | 5.1E-06 | 1.8E-04 |
| etot | 3 | Y | Y | 4 | M | -783.03330222386 | 1.4E-06  | 1.6E-06 | 4.3E-05 |
| etot | 4 | Y | N | 4 | M | -783.03330061721 | -1.6E-06 | 0.0E+00 | 0.0E+00 |

Energy components, in hartrees:

|     |                               |                   |       |
|-----|-------------------------------|-------------------|-------|
| (A) | Nuclear repulsion.....        | 1415.59318763375  |       |
| (E) | Total one-electron terms..... | -3875.69039243748 |       |
| (I) | Total two-electron terms..... | 1677.06390418651  |       |
| (L) | Electronic energy.....        | -2198.62648825096 | (E+I) |
| (N) | Total energy.....             | -783.03330061721  | (A+L) |

SCFE: SCF energy: HF -783.03330061721 hartrees iterations:

4

HOMO energy: -0.30327  
LUMO energy: 0.13261

Orbital energies:

|           |           |           |           |           |           |
|-----------|-----------|-----------|-----------|-----------|-----------|
| -20.52370 | -15.60099 | -11.34419 | -11.28711 | -11.25589 | -11.24890 |
| -11.24185 | -11.24036 | -11.24019 | -11.23995 | -11.23925 | -11.23590 |
| -11.23101 | -11.23085 | -11.22968 | -11.22892 | -11.22756 | -11.22659 |
| -11.22315 | -1.39477  | -1.26952  | -1.16531  | -1.14921  | -1.10757  |
| -1.03272  | -1.01974  | -1.01807  | -1.01131  | -0.96083  | -0.93324  |
| -0.85781  | -0.84806  | -0.83433  | -0.82045  | -0.79596  | -0.74170  |
| -0.71073  | -0.70030  | -0.67041  | -0.65043  | -0.64813  | -0.63594  |
| -0.63132  | -0.61538  | -0.61086  | -0.60158  | -0.59662  | -0.58319  |
| -0.58078  | -0.56482  | -0.54944  | -0.54506  | -0.53545  | -0.52344  |
| -0.52016  | -0.50686  | -0.49829  | -0.49598  | -0.48520  | -0.46995  |
| -0.46482  | -0.42092  | -0.40860  | -0.34194  | -0.33187  | -0.32294  |
| -0.30327  | 0.13261   | 0.13437   | 0.14416   | 0.14926   | 0.20788   |
| 0.23188   | 0.23803   | 0.24550   | 0.25995   | 0.28872   |           |

end of program scf

start of program derla  
end of program derla

start of program rwr  
end of program rwr

start of program derlb

forces (hartrees/bohr) : total

| atom | label | x             | y             | z             |
|------|-------|---------------|---------------|---------------|
| 1    | H1    | 1.657789E-05  | 2.544813E-06  | -3.373277E-06 |
| 2    | C1    | -5.172472E-06 | -7.198763E-07 | 2.662704E-05  |
| 3    | C2    | -2.609766E-05 | -1.273136E-06 | -1.548686E-05 |
| 4    | C3    | 5.593944E-05  | 3.750352E-05  | 1.920163E-05  |



|       |       |               |               |               |
|-------|-------|---------------|---------------|---------------|
| 5     | C4    | -2.477284E-05 | -3.412211E-06 | -1.076793E-05 |
| 6     | C5    | -6.307976E-06 | 8.702086E-07  | 7.345551E-06  |
| 7     | C6    | -1.374273E-06 | 1.055628E-05  | -2.727527E-05 |
| 8     | C7    | 1.015898E-05  | -3.190100E-05 | -1.022985E-05 |
| 9     | H3    | 1.336100E-06  | -1.441684E-06 | 6.076374E-07  |
| 10    | H4    | -1.290520E-05 | 7.027794E-06  | 3.121597E-06  |
| 11    | H6    | -2.254339E-05 | 1.122055E-05  | -1.256761E-05 |
| 12    | C16   | -8.131633E-06 | -4.342932E-06 | -7.572126E-05 |
| 13    | C8    | 1.817862E-05  | -1.150560E-05 | 2.838909E-06  |
| 14    | N2    | -2.338560E-05 | 6.535674E-05  | -7.314830E-05 |
| 15    | C9    | 6.774645E-05  | 3.668454E-05  | -1.093854E-04 |
| 16    | C11   | 1.693877E-05  | 2.615144E-05  | 1.638908E-05  |
| 17    | O1    | -6.492795E-05 | -5.926024E-05 | 4.135043E-05  |
| 18    | C18   | 7.642989E-05  | -1.422360E-06 | 8.289438E-05  |
| 19    | C19   | 3.928692E-05  | -8.296688E-05 | 1.736134E-05  |
| 20    | C20   | 3.971244E-05  | -3.795964E-05 | 2.286160E-05  |
| 21    | C21   | -2.588305E-05 | -1.116993E-05 | -9.306041E-05 |
| 22    | C22   | 5.002591E-05  | 2.821340E-05  | -4.644614E-05 |
| 23    | H2    | -7.356094E-05 | 6.991642E-05  | -4.072812E-05 |
| 24    | H5    | 3.312839E-06  | -1.047249E-06 | -5.457588E-05 |
| 25    | H7    | -4.291717E-05 | 1.650384E-05  | -1.874377E-05 |
| 26    | H8    | 9.272557E-05  | 3.095359E-05  | 6.278730E-05  |
| 27    | H9    | 3.926596E-05  | -7.364344E-06 | 1.004939E-05  |
| 28    | H10   | -4.037229E-06 | 3.030247E-06  | -3.481205E-05 |
| 29    | C10   | -5.418467E-05 | 1.100297E-05  | -4.638964E-05 |
| 30    | H11   | 3.448245E-05  | 4.423627E-05  | -2.277630E-05 |
| 31    | H12   | -1.976349E-05 | 8.491340E-06  | -9.580463E-06 |
| 32    | H13   | -1.368800E-06 | -7.604840E-06 | -2.175043E-05 |
| 33    | H14   | -1.443588E-05 | -1.042138E-05 | -3.805171E-05 |
| 34    | H15   | -3.734217E-05 | 9.618748E-06  | -1.005387E-05 |
| 35    | H16   | -1.264974E-05 | -2.542782E-05 | 1.706236E-05  |
| 36    | H17   | -8.727188E-06 | 1.782744E-05  | -5.884519E-06 |
| ----- |       | -----         | -----         | -----         |
|       | total | 7.162892E-05  | 1.384690E-04  | -4.503108E-04 |

end of program der1b

start of program geopt 14

geometry optimization step 14

reading input hessian of dimension 108

in five columns format

reading input hessian of dimension 108

in five columns format

reading input hessian of dimension 108

in five columns format

energy change: -1.1977E-06 # ( 5.0000E-05 )

gradient maximum: 1.5877E-04 \* ( 4.5000E-04 )

gradient rms: 3.9834E-05 # ( 3.0000E-04 )

step size: 0.00415 trust radius: 0.30000  
 displacement maximum: 1.9381E-03 . ( 1.8000E-03 )  
 displacement rms: 3.7594E-04 \* ( 1.2000E-03 )  
 predicted energy change: -3.7460E-07 geom step: 4.1524E-  
 03 full step: 4.1524E-03

\*\*\*\*\*  
 \*\* Geometry optimization complete \*\*  
 \*\*\*\*\*

center of mass moved by:  
 x: 0.0000E+00 y: 0.0000E+00 z: 0.0000E+00

final geometry:

|      | angstroms     |               |               |
|------|---------------|---------------|---------------|
| atom | x             | y             | z             |
| H1   | 1.0873225631  | 1.8740356996  | -2.1967669431 |
| C1   | 1.4075695345  | 1.7553611321  | -1.1756107630 |
| C2   | 2.2101040554  | 1.4399897819  | 1.4437134769  |
| C3   | 0.5915520537  | 1.0604036397  | -0.2994389538 |
| C4   | 2.6213261882  | 2.2858706647  | -0.7683551621 |
| C5   | 3.0155548813  | 2.1234394678  | 0.5466161693  |
| C6   | 0.9970522390  | 0.9002002060  | 1.0281998385  |
| C7   | -0.7351322176 | 0.4816902848  | -0.7417311644 |
| H3   | 3.2431590682  | 2.8176725195  | -1.4658220860 |
| H4   | 3.9503053051  | 2.5328687283  | 0.8872974977  |
| H6   | 2.5302626680  | 1.3389041983  | 2.4624047894  |
| C16  | -0.6484959760 | -0.9402089407 | -1.3007668137 |
| C8   | -1.7345167883 | 0.5757891140  | 0.4273753836  |
| N2   | 0.1811219234  | 0.1787728055  | 1.9267531824  |
| C9   | -1.1623142954 | -0.0004615067 | 1.7093620875  |
| C11  | 0.7420434031  | -0.3206752566 | 3.1736974990  |
| O1   | -1.8666783392 | -0.5505674831 | 2.5086633502  |
| C18  | -0.6305239831 | -3.5395893382 | -2.3376767482 |
| C19  | -1.6602117605 | -1.3801387888 | -2.1523732841 |
| C20  | 0.3754361970  | -1.8230566344 | -0.9847378891 |
| C21  | 0.3823758086  | -3.1132267411 | -1.4972317720 |
| C22  | -1.6556219849 | -2.6643026021 | -2.6662515461 |
| H2   | -2.4597582434 | -0.7081919123 | -2.4171713098 |
| H5   | 1.1786085483  | -1.5094515363 | -0.3442970198 |
| H7   | 1.1852665442  | -3.7814504098 | -1.2384040781 |
| H8   | -2.4471352063 | -2.9803861643 | -3.3234029244 |
| H9   | -0.6220109882 | -4.5389617150 | -2.7358466293 |
| H10  | -1.1187866345 | 1.1080633130  | -1.5415617356 |
| C10  | -2.2053318367 | 2.0149009697  | 0.6914469162  |
| H11  | -1.3768830654 | 2.6771113800  | 0.9182989018  |
| H12  | -2.8981092585 | 2.0336413654  | 1.5249667325  |
| H13  | -2.7158621653 | 2.4042321355  | -0.1838458554 |
| H14  | -2.6034300371 | -0.0328235863 | 0.2142993913  |
| H15  | 1.7014266015  | -0.7846075109 | 2.9812736927  |
| H16  | 0.0627323523  | -1.0499434529 | 3.5796876660  |
| H17  | 0.8728444505  | 0.4758884026  | 3.8997402002  |

```
nuclear repulsion energy..... 1415.593187634 hartrees
-----
/  end of geometry optimization iteration 14  /
-----

end of program geopt

start of program post
Writing a SPARTAN archive file
end of program post

Total cpu seconds      user:      1010.859   user+sys:   1010.859
```

TRANS 2 (EQ-EQ)

```
+-----+
---+
| Jaguar version 3.5, release 42
|
|
| Copyright 1991-1998 Schrodinger, Inc.
|
| All Rights Reserved.
|
|
| Use of this program should be acknowledged in publications
as: |
| Jaguar 3.5, Schrodinger, Inc., Portland, Oregon, 1998.
|
+-----+
-----+
```

start of program pre  
Job name: WF19262  
Executables used: D:\TITAN  
Temporary files : C:\Users\gfabr\AppData\Local\Temp\WF19262

Input file comments:  
Molecule001  
This file created by Spartan

basis set: 6-31G\*\*  
net molecular charge: 0  
multiplicity: 1

number of basis functions.... 370

Input geometry:

|      | angstroms     |               |               |
|------|---------------|---------------|---------------|
| atom | x             | y             | z             |
| H1   | -0.2632070000 | 1.4490920000  | -1.9967150000 |
| C1   | -0.1922820000 | 1.8630240000  | -0.9827220000 |
| C2   | -0.0220980000 | 2.9205440000  | 1.5809750000  |
| C3   | 0.1719080000  | 1.0263790000  | 0.0727920000  |
| C4   | -0.4719140000 | 3.2060380000  | -0.7672030000 |
| C5   | -0.3957510000 | 3.7303800000  | 0.5177070000  |
| C6   | 0.2824390000  | 1.5682950000  | 1.3658120000  |
| C7   | 0.4868090000  | -0.4220770000 | -0.1784520000 |
| H3   | -0.7560510000 | 3.8471180000  | -1.6077730000 |
| H4   | -0.6298660000 | 4.7854000000  | 0.6944020000  |
| H6   | 0.0270900000  | 3.3559530000  | 2.5867300000  |
| H7   | 1.5910980000  | -0.4805290000 | -0.3654610000 |
| C10  | -0.2327600000 | -0.9640970000 | -1.3883640000 |
| C8   | 0.1607630000  | -1.2828330000 | 1.0554990000  |

|     |               |               |               |
|-----|---------------|---------------|---------------|
| C16 | 0.6386940000  | -2.7123290000 | 0.8558630000  |
| H12 | -0.9488380000 | -1.2947100000 | 1.2079970000  |
| N2  | 0.6805350000  | 0.7433530000  | 2.4790550000  |
| C9  | 0.7675990000  | -0.6722710000 | 2.3101260000  |
| C17 | 1.4070260000  | 1.4067250000  | 3.5864890000  |
| O1  | 1.2598680000  | -1.3228910000 | 3.2197340000  |
| C11 | -1.5277450000 | -1.9970000000 | -3.6375380000 |
| C12 | 0.5075810000  | -1.4298780000 | -2.4770510000 |
| C13 | -1.6280170000 | -1.0170630000 | -1.4376170000 |
| C14 | -2.2705290000 | -1.5322850000 | -2.5571970000 |
| C15 | -0.1390100000 | -1.9437780000 | -3.5959010000 |
| H19 | 1.6031670000  | -1.3936960000 | -2.4510310000 |
| H20 | -2.2181620000 | -0.6441140000 | -0.5919670000 |
| H21 | -3.3643960000 | -1.5710700000 | -2.5874630000 |
| H22 | 0.4488190000  | -2.3078780000 | -4.4449180000 |
| H23 | -2.0354520000 | -2.4032150000 | -4.5183150000 |
| H24 | 1.7287330000  | -2.7639830000 | 0.7343660000  |
| H25 | 0.1839710000  | -3.1519640000 | -0.0420940000 |
| H11 | 0.3724790000  | -3.3470310000 | 1.7108170000  |
| H2  | 2.0322840000  | 2.2323690000  | 3.2166710000  |
| H5  | 2.0608610000  | 0.7058760000  | 4.1249350000  |
| H8  | 0.6843540000  | 1.8141420000  | 4.3078120000  |

Molecular weight: 251.13 amu

Stoichiometry: C17NH17O

Molecular Point Group: C1

Point Group used: C1

nuclear repulsion energy..... 1389.422979657 hartrees

Non-default options chosen:

Geometry will be optimized in redundant internal coordinates

Initial Hessian: from previous calculation

end of program pre

start of program onee

smallest eigenvalue of S: 3.501E-04

number of canonical orbitals..... 368

end of program onee

start of program hfig

initial wavefunction generated automatically from atomic wavefunctions

| Irreducible representation | Total no orbitals | No of occupied orbitals |         |     |
|----------------------------|-------------------|-------------------------|---------|-----|
| No Symm                    | 368               | Shell_1                 | Shell_2 | ... |
| -----                      |                   | 67                      |         |     |
| Orbital occupation/shell   |                   | 1.000                   |         |     |

S217

end of program hfig

start of program probe

end of program probe

start of program grid

number of gridpoints:

| atom     | H1  | C1  | C2  | C3  | C4  | C5  | C6  |
|----------|-----|-----|-----|-----|-----|-----|-----|
| C7       |     |     |     |     |     |     |     |
| grid # 1 | 70  | 88  | 88  | 90  | 89  | 89  | 88  |
| 82       |     |     |     |     |     |     |     |
| grid # 2 | 112 | 96  | 96  | 98  | 97  | 97  | 99  |
| 90       |     |     |     |     |     |     |     |
| grid # 3 | 214 | 184 | 185 | 195 | 184 | 185 | 188 |
| 175      |     |     |     |     |     |     |     |
| grid # 4 | 221 | 328 | 329 | 343 | 328 | 328 | 330 |
| 309      |     |     |     |     |     |     |     |

number of gridpoints:

| atom     | H3  | H4  | H6  | H7  | C10 | C8  | C16 |
|----------|-----|-----|-----|-----|-----|-----|-----|
| H12      |     |     |     |     |     |     |     |
| grid # 1 | 73  | 73  | 70  | 69  | 92  | 82  | 74  |
| 68       |     |     |     |     |     |     |     |
| grid # 2 | 118 | 118 | 113 | 112 | 100 | 90  | 81  |
| 110      |     |     |     |     |     |     |     |
| grid # 3 | 224 | 223 | 209 | 210 | 191 | 175 | 150 |
| 213      |     |     |     |     |     |     |     |
| grid # 4 | 232 | 232 | 217 | 209 | 340 | 309 | 291 |
| 211      |     |     |     |     |     |     |     |

number of gridpoints:

| atom     | N2  | C9  | C17 | O1  | C11 | C12 | C13 |
|----------|-----|-----|-----|-----|-----|-----|-----|
| C14      |     |     |     |     |     |     |     |
| grid # 1 | 99  | 84  | 75  | 111 | 89  | 87  | 87  |
| 89       |     |     |     |     |     |     |     |
| grid # 2 | 107 | 94  | 80  | 123 | 97  | 95  | 95  |
| 95       |     |     |     |     |     |     |     |
| grid # 3 | 218 | 179 | 148 | 259 | 183 | 184 | 184 |
| 183      |     |     |     |     |     |     |     |
| grid # 4 | 396 | 299 | 279 | 454 | 326 | 328 | 328 |
| 326      |     |     |     |     |     |     |     |

number of gridpoints:

| atom     | C15 | H19 | H20 | H21 | H22 | H23 | H24 |
|----------|-----|-----|-----|-----|-----|-----|-----|
| H25      |     |     |     |     |     |     |     |
| grid # 1 | 89  | 73  | 70  | 73  | 73  | 73  | 71  |
| 71       |     |     |     |     |     |     |     |

|          |     |     |     |     |     |     |     |
|----------|-----|-----|-----|-----|-----|-----|-----|
| grid # 2 | 95  | 111 | 112 | 118 | 118 | 118 | 110 |
| 110      |     |     |     |     |     |     |     |
| grid # 3 | 183 | 214 | 213 | 224 | 224 | 224 | 218 |
| 214      |     |     |     |     |     |     |     |
| grid # 4 | 326 | 221 | 218 | 232 | 232 | 232 | 222 |
| 216      |     |     |     |     |     |     |     |

number of gridpoints:

|          |     |     |     |     |       |
|----------|-----|-----|-----|-----|-------|
| atom     | H11 | H2  | H5  | H8  | total |
| grid # 1 | 71  | 71  | 70  | 71  | 2882  |
| grid # 2 | 110 | 110 | 110 | 110 | 3745  |
| grid # 3 | 219 | 215 | 215 | 217 | 7223  |
| grid # 4 | 223 | 222 | 222 | 222 | 10081 |

end of program grid

start of program rwr

end of program rwr

start of program scf

|                               |     |
|-------------------------------|-----|
| number of electrons.....      | 134 |
| number of alpha electrons.... | 67  |
| number of beta electrons..... | 67  |
| number of orbitals, total.... | 368 |
| number of core orbitals.....  | 67  |
| number of open shell orbs.... | 0   |
| number of occupied orbitals.. | 67  |
| number of virtual orbitals... | 301 |
| number of hamiltonians.....   | 1   |
| number of shells.....         | 1   |

SCF type: HF

|      | i  | u | d | i | g |                  | RMS      | maximum |
|------|----|---|---|---|---|------------------|----------|---------|
|      | t  | p | i | c | r |                  | density  | DIIS    |
|      | e  | d | i | u | i | energy           | change   | error   |
|      | r  | t | s | t | d | total energy     |          |         |
| etot | 1  | N | N | 5 | M | -780.41224313436 | 4.8E-03  | 1.0E-01 |
| etot | 2  | Y | Y | 6 | M | -782.69511415717 | 2.3E+00  | 4.0E-02 |
| etot | 3  | Y | Y | 6 | M | -782.94073970549 | 2.5E-01  | 2.7E-02 |
| etot | 4  | N | Y | 2 | U | -782.99814000209 | 5.7E-02  | 1.3E-02 |
| etot | 5  | Y | Y | 6 | M | -783.00909207368 | 1.1E-02  | 8.3E-03 |
| etot | 6  | N | Y | 2 | U | -783.01664101183 | 7.5E-03  | 1.8E-03 |
| etot | 7  | Y | Y | 6 | M | -783.01703738933 | 4.0E-04  | 4.6E-04 |
| etot | 8  | Y | Y | 6 | M | -783.01711453282 | 7.7E-05  | 1.6E-04 |
| etot | 9  | N | Y | 2 | U | -783.01696026698 | -1.5E-04 | 4.6E-05 |
| etot | 10 | Y | Y | 6 | M | -783.01697008578 | 9.8E-06  | 4.6E-05 |
| etot | 11 | Y | N | 6 | M | -783.01697392616 | 3.8E-06  | 0.0E+00 |

Energy components, in hartrees:

|     |                               |                   |       |
|-----|-------------------------------|-------------------|-------|
| (A) | Nuclear repulsion.....        | 1389.42297965676  |       |
| (E) | Total one-electron terms..... | -3823.49863253277 |       |
| (I) | Total two-electron terms..... | 1651.05867894985  |       |
| (L) | Electronic energy.....        | -2172.43995358292 | (E+I) |
| (N) | Total energy.....             | -783.01697392616  | (A+L) |

SCFE: SCF energy: HF -783.01697392616 hartrees iterations:  
11

HOMO energy: -0.29943  
LUMO energy: 0.12349

Orbital energies:

|           |           |           |           |           |           |
|-----------|-----------|-----------|-----------|-----------|-----------|
| -20.53206 | -15.59983 | -11.35678 | -11.28696 | -11.26225 | -11.25492 |
| -11.25425 | -11.24685 | -11.24272 | -11.24254 | -11.24180 | -11.23975 |
| -11.23948 | -11.23936 | -11.23877 | -11.23723 | -11.23674 | -11.23041 |
| -11.21648 | -1.38068  | -1.24500  | -1.16986  | -1.14163  | -1.10881  |
| -1.03225  | -1.01842  | -1.01470  | -1.00680  | -0.94795  | -0.92957  |
| -0.85828  | -0.82994  | -0.82652  | -0.82570  | -0.78631  | -0.72997  |
| -0.71021  | -0.69237  | -0.67325  | -0.65920  | -0.63515  | -0.63001  |
| -0.62525  | -0.60999  | -0.60710  | -0.60168  | -0.59516  | -0.58712  |
| -0.56637  | -0.55982  | -0.54216  | -0.53493  | -0.52407  | -0.52280  |
| -0.51209  | -0.50181  | -0.49625  | -0.49569  | -0.48431  | -0.46978  |
| -0.46732  | -0.42040  | -0.40962  | -0.34496  | -0.33693  | -0.32381  |
| -0.29943  | 0.12349   | 0.13307   | 0.13814   | 0.15110   | 0.18923   |
| 0.23027   | 0.23577   | 0.24326   | 0.26113   | 0.26789   |           |

end of program scf

start of program derla  
end of program derla

start of program rwr  
end of program rwr

start of program derlb

forces (hartrees/bohr) : total

| atom | label | x             | y            | z             |
|------|-------|---------------|--------------|---------------|
| 1    | H1    | 1.216512E-03  | 7.401360E-03 | 1.636917E-02  |
| 2    | C1    | -9.484811E-04 | 1.628128E-03 | -4.343009E-03 |
| 3    | C2    | 1.181325E-03  | 1.618374E-03 | 7.903980E-03  |
| 4    | C3    | -3.711416E-03 | 1.669903E-02 | 3.097753E-03  |
| 5    | C4    | -2.438866E-03 | 7.130554E-03 | -7.777885E-03 |
| 6    | C5    | -9.235378E-04 | 6.177562E-03 | -1.025313E-03 |



|       |       |               |               |               |
|-------|-------|---------------|---------------|---------------|
| 7     | C6    | -2.933914E-03 | -4.683387E-03 | 1.010828E-02  |
| 8     | C7    | 1.580877E-02  | -1.851436E-03 | 2.952512E-03  |
| 9     | H3    | 3.410965E-03  | -8.063187E-03 | 1.043779E-02  |
| 10    | H4    | 2.988176E-03  | -1.340038E-02 | -1.623107E-03 |
| 11    | H6    | -7.528020E-04 | -8.604488E-03 | -1.520838E-02 |
| 12    | H7    | -1.951487E-02 | -2.982938E-03 | 3.965787E-03  |
| 13    | C10   | 4.092947E-03  | -5.478590E-03 | -1.212714E-02 |
| 14    | C8    | -9.341802E-03 | 2.741624E-03  | 3.404947E-03  |
| 15    | C16   | 1.724932E-03  | -2.041182E-02 | 3.267188E-03  |
| 16    | H12   | 2.072100E-02  | 3.272786E-03  | -1.121009E-03 |
| 17    | N2    | 1.112626E-02  | -1.661463E-02 | -3.135123E-02 |
| 18    | C9    | 1.704681E-02  | 1.994385E-02  | 5.960055E-02  |
| 19    | C17   | -1.454321E-03 | -4.571388E-03 | 8.626210E-03  |
| 20    | O1    | -1.859035E-02 | 1.531711E-02  | -4.140475E-02 |
| 21    | C11   | -2.260597E-03 | -3.783296E-03 | -8.452221E-03 |
| 22    | C12   | 2.228845E-03  | 5.780684E-04  | 7.388006E-04  |
| 23    | C13   | -4.061735E-03 | 7.164229E-04  | 3.493603E-03  |
| 24    | C14   | -8.163763E-03 | 4.313684E-04  | 2.222082E-03  |
| 25    | C15   | 2.861288E-03  | -3.597021E-03 | -8.324973E-03 |
| 26    | H19   | -1.463594E-02 | -1.776008E-04 | 1.632400E-04  |
| 27    | H20   | 7.530248E-03  | -4.575028E-03 | -1.245692E-02 |
| 28    | H21   | 1.355474E-02  | 5.416067E-04  | 4.156136E-04  |
| 29    | H22   | -7.366234E-03 | 4.432473E-03  | 1.037037E-02  |
| 30    | H23   | 6.318494E-03  | 5.082074E-03  | 1.090519E-02  |
| 31    | H24   | -8.493563E-03 | 2.254889E-03  | 1.816371E-03  |
| 32    | H25   | 3.602734E-03  | 5.542729E-03  | 9.305871E-03  |
| 33    | H11   | 3.330205E-03  | 7.343086E-03  | -7.042697E-03 |
| 34    | H2    | -8.547816E-03 | -9.569305E-03 | -6.595902E-04 |
| 35    | H5    | -1.250518E-02 | 3.581786E-03  | -1.156888E-02 |
| 36    | H8    | 7.526786E-03  | -3.130208E-03 | -5.974848E-03 |
| ----- |       | -----         | -----         | -----         |
|       | total | -3.741457E-04 | 9.401775E-04  | -1.296659E-03 |

end of program der1b

start of program geopt 1

geometry optimization step 1  
 reading input hessian of dimension 108  
 in five columns format

Level shifts adjusted to satisfy step-size constraints  
 Step size: 0.3004235  
 Cos(theta): 0.8097400

Final level shift: -7.1129141E-02

gradient maximum: 4.6421E-02 . ( 4.5000E-04 )  
 gradient rms: 1.0915E-02 . ( 3.0000E-04 )  
 step size: 0.30042 trust radius: 0.30000

displacement maximum: 1.0149E-01 . ( 1.8000E-03 )  
displacement rms: 2.7199E-02 . ( 1.2000E-03 )  
predicted energy change: -1.7874E-02 geom step: 3.0042E-  
01 full step: 3.0042E-01  
molecular structure not yet converged...

center of mass moved by:  
x: 2.3991E-02 y: 8.7476E-03 z: -2.7017E-02

new geometry:

|      | angstroms     |               |               |
|------|---------------|---------------|---------------|
| atom | x             | y             | z             |
| H1   | -0.3233054359 | 1.5524589487  | -1.9475020147 |
| C1   | -0.2239662350 | 1.9217702639  | -0.9451958548 |
| C2   | 0.0074050266  | 2.9097785253  | 1.5879783273  |
| C3   | 0.1623146593  | 1.0577122290  | 0.0682075255  |
| C4   | -0.4960147779 | 3.2580678993  | -0.7111671030 |
| C5   | -0.3895940860 | 3.7447732384  | 0.5654029444  |
| C6   | 0.3103170107  | 1.5730729949  | 1.3468583504  |
| C7   | 0.4689769921  | -0.4102457139 | -0.1923143171 |
| H3   | -0.7945944805 | 3.9009270237  | -1.5195083551 |
| H4   | -0.6172974209 | 4.7742179789  | 0.7762559786  |
| H6   | 0.0823911603  | 3.3099165095  | 2.5787107779  |
| H7   | 1.5428708771  | -0.4874998146 | -0.3782428806 |
| C10  | -0.2397527156 | -0.9757213662 | -1.4123366481 |
| C8   | 0.1757762685  | -1.2472295649 | 1.0693336547  |
| C16  | 0.5950591169  | -2.7041935058 | 0.9470091322  |
| H12  | -0.8912175798 | -1.2129158036 | 1.2634904340  |
| N2   | 0.7333627481  | 0.7492084767  | 2.4193894183  |
| C9   | 0.8172149517  | -0.6323258527 | 2.3048138033  |
| C17  | 1.3632818307  | 1.3587829239  | 3.5846685076  |
| O1   | 1.3098242984  | -1.3190152768 | 3.1517759515  |
| C11  | -1.5329017608 | -2.0495830653 | -3.6436011536 |
| C12  | 0.4866093356  | -1.4335773591 | -2.4974137514 |
| C13  | -1.6296037965 | -1.0600231967 | -1.4613723850 |
| C14  | -2.2704711789 | -1.5933371198 | -2.5635188934 |
| C15  | -0.1506004056 | -1.9668753319 | -3.6081287347 |
| H19  | 1.5600066926  | -1.3802941893 | -2.4848359129 |
| H20  | -2.2173860238 | -0.7021409676 | -0.6342774474 |
| H21  | -3.3432905328 | -1.6553136130 | -2.5813994550 |
| H22  | 0.4300347654  | -2.3181277140 | -4.4439246156 |
| H23  | -2.0283452018 | -2.4653000982 | -4.5039411372 |
| H24  | 1.6691163104  | -2.7809876315 | 0.7939142418  |
| H25  | 0.0914571248  | -3.1650405823 | 0.1057695913  |
| H11  | 0.3534798976  | -3.2570268342 | 1.8479164175  |
| H2   | 2.0068930016  | 2.1706348652  | 3.2681350390  |
| H5   | 1.9232845083  | 0.6031705140  | 4.1186331865  |
| H8   | 0.6016287406  | 1.7656350632  | 4.2451007145  |

nuclear repulsion energy..... 1394.427370292 hartrees

-----  
/ end of geometry optimization iteration 1 /

-----  
end of program geopt

start of program onee  
smallest eigenvalue of S: 3.205E-04  
number of canonical orbitals..... 368  
end of program onee

start of program probe  
end of program probe

start of program grid

number of gridpoints:  
atom H1 C1 C2 C3 C4 C5 C6  
C7  
grid # 1 71 86 86 92 89 88 84  
82  
grid # 2 113 96 96 100 97 97 94  
90  
grid # 3 213 182 183 193 182 183 186  
175  
grid # 4 212 327 327 342 326 328 326  
312

number of gridpoints:  
atom H3 H4 H6 H7 C10 C8 C16  
H12  
grid # 1 73 73 70 67 90 81 73  
69  
grid # 2 118 118 113 106 100 90 80  
108  
grid # 3 223 223 208 208 193 172 151  
212  
grid # 4 223 223 207 207 339 314 288  
206

number of gridpoints:  
atom N2 C9 C17 O1 C11 C12 C13  
C14  
grid # 1 98 82 72 111 89 86 87  
89  
grid # 2 107 92 79 123 97 95 95  
95  
grid # 3 216 175 144 255 182 182 183  
183  
grid # 4 393 295 274 449 326 326 327  
326

```

number of gridpoints:
  atom      C15    H19    H20    H21    H22    H23    H24
H25
  grid # 1      89     73     71     73     73     73     71
71
  grid # 2      96    111    113    118    118    118    108
110
  grid # 3     183    213    212    222    222    223    217
215
  grid # 4     326    212    209    223    224    224    220
211

```

```

number of gridpoints:
  atom      H11     H2     H5     H8  total
grid # 1      70     72     71     71  2866
grid # 2     108    109    106    111  3725
grid # 3     217    216    214    217  7178
grid # 4     218    212    212    217  9931

```

end of program grid

```

start of program rwr
end of program rwr

```

start of program scf

|      | i | u | d | i | g |                  |         | RMS     | maximum |
|------|---|---|---|---|---|------------------|---------|---------|---------|
|      | t | p | i | c | r |                  |         | density | DIIS    |
|      | e | d | i | u | i | total energy     | energy  | change  | error   |
|      | r | t | s | t | d |                  | change  |         |         |
| etot | 1 | N | N | 2 | U | -783.01661463221 |         | 3.4E-04 | 6.1E-03 |
| etot | 2 | Y | Y | 6 | M | -783.03038147071 | 1.4E-02 | 1.2E-04 | 1.8E-03 |
| etot | 3 | N | Y | 2 | U | -783.03172559975 | 1.3E-03 | 4.2E-05 | 7.6E-04 |
| etot | 4 | Y | Y | 6 | M | -783.03188003352 | 1.5E-04 | 1.8E-05 | 3.0E-04 |
| etot | 5 | Y | Y | 6 | M | -783.03190512950 | 2.5E-05 | 6.4E-06 | 1.0E-04 |
| etot | 6 | Y | Y | 6 | M | -783.03191178670 | 6.7E-06 | 2.6E-06 | 3.8E-05 |
| etot | 7 | Y | N | 6 | M | -783.03191372217 | 1.9E-06 | 0.0E+00 | 0.0E+00 |

Energy components, in hartrees:

```

(A) Nuclear repulsion..... 1394.42737029176
(E) Total one-electron terms..... -3833.33263364082
(I) Total two-electron terms..... 1655.87334962689
(L) Electronic energy..... -2177.45928401393 (E+I)
(N) Total energy..... -783.03191372217 (A+L)

```

SCFE: SCF energy: HF -783.03191372217 hartrees iterations:

7

HOMO energy: -0.30202  
LUMO energy: 0.12785

Orbital energies:

|           |           |           |           |           |           |
|-----------|-----------|-----------|-----------|-----------|-----------|
| -20.53029 | -15.59887 | -11.34783 | -11.28415 | -11.25476 | -11.25190 |
| -11.24308 | -11.24165 | -11.24087 | -11.23591 | -11.23560 | -11.23408 |
| -11.23331 | -11.23300 | -11.23287 | -11.23277 | -11.23070 | -11.22491 |
| -11.20745 | -1.39943  | -1.26530  | -1.17017  | -1.15031  | -1.10778  |
| -1.03237  | -1.02208  | -1.01867  | -1.01438  | -0.95675  | -0.93293  |
| -0.85881  | -0.83612  | -0.83171  | -0.83102  | -0.79162  | -0.74064  |
| -0.71305  | -0.69668  | -0.68069  | -0.66472  | -0.63912  | -0.63699  |
| -0.63065  | -0.61617  | -0.61323  | -0.60515  | -0.59911  | -0.58875  |
| -0.57055  | -0.56188  | -0.55102  | -0.53839  | -0.52863  | -0.52056  |
| -0.51449  | -0.50517  | -0.50002  | -0.49717  | -0.48540  | -0.47072  |
| -0.46865  | -0.42214  | -0.41186  | -0.34350  | -0.33711  | -0.32530  |
| -0.30202  | 0.12785   | 0.13651   | 0.14169   | 0.15262   | 0.20401   |
| 0.23660   | 0.24061   | 0.25330   | 0.26312   | 0.27316   |           |

end of program scf

start of program derla  
end of program derla

start of program rwr  
end of program rwr

start of program derlb

forces (hartrees/bohr) : total

| atom | label | x             | y             | z             |
|------|-------|---------------|---------------|---------------|
| ---- | ----- | -----         | -----         | -----         |
| 1    | H1    | 2.946812E-04  | -2.480286E-03 | -3.119281E-04 |
| 2    | C1    | -1.414020E-03 | 1.221586E-03  | -4.758878E-03 |
| 3    | C2    | 2.860683E-03  | 3.244940E-04  | 5.780297E-03  |
| 4    | C3    | -1.381596E-03 | -2.778642E-03 | -8.769305E-03 |
| 5    | C4    | -8.018140E-04 | -2.704573E-03 | -9.180670E-03 |
| 6    | C5    | 3.178814E-05  | 5.398674E-03  | 5.978645E-03  |
| 7    | C6    | -4.975090E-03 | -8.522176E-04 | 1.362908E-02  |
| 8    | C7    | 4.597344E-03  | -1.047195E-03 | 1.154727E-03  |
| 9    | H3    | -5.355948E-05 | -6.721349E-04 | -7.360825E-04 |
| 10   | H4    | 2.676963E-04  | 4.328616E-04  | 9.426712E-04  |
| 11   | H6    | -8.083509E-05 | -5.141850E-04 | 1.614840E-03  |
| 12   | H7    | -1.493302E-03 | -9.494878E-05 | 7.622630E-05  |
| 13   | C10   | -1.719876E-03 | 1.366604E-03  | 2.081013E-03  |
| 14   | C8    | 7.139626E-04  | 3.063500E-03  | 3.111099E-03  |
| 15   | C16   | 2.113760E-03  | -4.534018E-03 | -1.947305E-03 |

S225

|       |       |               |               |               |
|-------|-------|---------------|---------------|---------------|
| 16    | H12   | -3.434140E-03 | 1.541293E-03  | -2.685647E-04 |
| 17    | N2    | 1.223482E-02  | -1.498630E-02 | -4.726356E-03 |
| 18    | C9    | -6.460669E-03 | 1.214446E-02  | -4.601785E-03 |
| 19    | C17   | -6.827225E-03 | 2.188684E-03  | 2.354379E-03  |
| 20    | O1    | 1.878983E-03  | 3.567462E-03  | 3.944199E-03  |
| 21    | C11   | 3.522130E-03  | -1.119456E-03 | -2.784678E-03 |
| 22    | C12   | 1.378590E-03  | -1.090514E-03 | -3.039976E-03 |
| 23    | C13   | -9.024747E-04 | 2.247939E-04  | 1.193181E-03  |
| 24    | C14   | -5.194442E-04 | 7.994157E-05  | 9.485047E-04  |
| 25    | C15   | -3.144207E-03 | -9.882206E-04 | -2.116226E-03 |
| 26    | H19   | 1.384487E-03  | 4.178748E-04  | 6.565263E-04  |
| 27    | H20   | 1.319449E-04  | 4.942550E-04  | -3.116216E-05 |
| 28    | H21   | -1.004921E-03 | 3.351855E-04  | 2.751131E-04  |
| 29    | H22   | 1.892500E-04  | 2.242599E-04  | 6.256668E-04  |
| 30    | H23   | 5.597755E-05  | 1.781865E-04  | 3.582990E-04  |
| 31    | H24   | -1.553314E-03 | -6.139467E-04 | -2.084405E-04 |
| 32    | H25   | 6.294887E-04  | -8.646965E-04 | 4.857943E-04  |
| 33    | H11   | 1.899193E-04  | 2.082679E-03  | -1.785110E-03 |
| 34    | H2    | 2.323944E-03  | -1.732962E-03 | 9.728723E-04  |
| 35    | H5    | -1.396116E-03 | 3.130499E-03  | -3.132728E-03 |
| 36    | H8    | 2.278221E-03  | -4.086534E-04 | 1.417418E-03  |
| ----- |       | -----         | -----         | -----         |
|       | total | -8.493522E-05 | 9.343482E-04  | -7.986462E-04 |

end of program derlb

start of program geopt 2

geometry optimization step 2

reading input hessian of dimension 108

in five columns format

Level shifts adjusted to satisfy step-size constraints

Step size: 0.3000065

Cos(theta): 0.4060511

Final level shift: -1.5786604E-02

energy change: -1.4940E-02 . ( 5.0000E-05 )

gradient maximum: 1.5589E-02 . ( 4.5000E-04 )

gradient rms: 3.1363E-03 . ( 3.0000E-04 )

step size: 0.29998 trust radius: 0.30000

displacement maximum: 1.7545E-01 . ( 1.8000E-03 )

displacement rms: 2.7159E-02 . ( 1.2000E-03 )

predicted energy change: -2.8203E-03 geom step: 2.9998E-

01 full step: 2.9998E-01

molecular structure not yet converged...

center of mass moved by:

x: 1.7179E-02 y: 3.6276E-03 z: -1.0908E-02

new geometry:

|      | angstroms     |               |               |
|------|---------------|---------------|---------------|
| atom | x             | y             | z             |
| H1   | -0.3996483143 | 1.5369179461  | -1.9363770706 |
| C1   | -0.2730432873 | 1.9217832495  | -0.9446919708 |
| C2   | 0.0360693755  | 2.9144428262  | 1.6102354164  |
| C3   | 0.1495351132  | 1.0633782155  | 0.0604088388  |
| C4   | -0.5399974571 | 3.2591863390  | -0.6948484360 |
| C5   | -0.3929202203 | 3.7473670502  | 0.5928367385  |
| C6   | 0.3347320222  | 1.5783706301  | 1.3511142379  |
| C7   | 0.4651728514  | -0.4083799650 | -0.1984790275 |
| H3   | -0.8666947368 | 3.8999357505  | -1.4916504543 |
| H4   | -0.6134795246 | 4.7752942710  | 0.8141777273  |
| H6   | 0.1351042536  | 3.3089667482  | 2.6003830771  |
| H7   | 1.5331740386  | -0.4879411432 | -0.3854093240 |
| C10  | -0.2435106964 | -0.9805386954 | -1.4188333608 |
| C8   | 0.1657996569  | -1.2267682839 | 1.0760094583  |
| C16  | 0.5491856917  | -2.6989038081 | 0.9561364962  |
| H12  | -0.9015233051 | -1.1551804396 | 1.2764599388  |
| N2   | 0.8228637823  | 0.7514992683  | 2.3803398805  |
| C9   | 0.8383065184  | -0.6098634052 | 2.2930333040  |
| C17  | 1.3541778128  | 1.3533257907  | 3.6070993777  |
| O1   | 1.3243280291  | -1.2920135116 | 3.1533606174  |
| C11  | -1.5253313347 | -2.0783442760 | -3.6554667787 |
| C12  | 0.4845809708  | -1.4379766487 | -2.5084357534 |
| C13  | -1.6302601779 | -1.0758006953 | -1.4685555075 |
| C14  | -2.2649308215 | -1.6210670026 | -2.5721700794 |
| C15  | -0.1490955569 | -1.9825524836 | -3.6212175039 |
| H19  | 1.5580285539  | -1.3722426757 | -2.4914288360 |
| H20  | -2.2210236799 | -0.7150790993 | -0.6475211221 |
| H21  | -3.3378524882 | -1.6875776664 | -2.5875264862 |
| H22  | 0.4388408846  | -2.3292597046 | -4.4507514522 |
| H23  | -2.0207302030 | -2.5007353703 | -4.5092025274 |
| H24  | 1.6126357849  | -2.8025872921 | 0.7596910395  |
| H25  | -0.0003772391 | -3.1666863820 | 0.1462627778  |
| H11  | 0.3325329569  | -3.2200891237 | 1.8786962291  |
| H2   | 2.0504101170  | 2.1442691948  | 3.3484708458  |
| H5   | 1.8558065962  | 0.5861685851  | 4.1785594754  |
| H8   | 0.5548312631  | 1.7729272301  | 4.2217791524  |

nuclear repulsion energy..... 1393.103272287 hartrees

-----  
/ end of geometry optimization iteration 2 /  
-----

end of program geopt

start of program onee

smallest eigenvalue of S: 3.360E-04

number of canonical orbitals..... 368

end of program onee

start of program probe

end of program probe

start of program grid

number of gridpoints:

| atom     | H1  | C1  | C2  | C3  | C4  | C5  | C6  |
|----------|-----|-----|-----|-----|-----|-----|-----|
| C7       |     |     |     |     |     |     |     |
| grid # 1 | 71  | 87  | 89  | 88  | 89  | 89  | 86  |
| 82       |     |     |     |     |     |     |     |
| grid # 2 | 113 | 96  | 96  | 98  | 97  | 97  | 93  |
| 91       |     |     |     |     |     |     |     |
| grid # 3 | 213 | 184 | 184 | 192 | 183 | 184 | 191 |
| 171      |     |     |     |     |     |     |     |
| grid # 4 | 212 | 327 | 329 | 340 | 328 | 328 | 326 |
| 315      |     |     |     |     |     |     |     |

number of gridpoints:

| atom     | H3  | H4  | H6  | H7  | C10 | C8  | C16 |
|----------|-----|-----|-----|-----|-----|-----|-----|
| H12      |     |     |     |     |     |     |     |
| grid # 1 | 73  | 73  | 70  | 67  | 92  | 82  | 73  |
| 68       |     |     |     |     |     |     |     |
| grid # 2 | 118 | 118 | 111 | 106 | 100 | 90  | 80  |
| 111      |     |     |     |     |     |     |     |
| grid # 3 | 223 | 223 | 207 | 211 | 192 | 175 | 150 |
| 213      |     |     |     |     |     |     |     |
| grid # 4 | 224 | 223 | 206 | 208 | 339 | 310 | 288 |
| 209      |     |     |     |     |     |     |     |

number of gridpoints:

| atom     | N2  | C9  | C17 | O1  | C11 | C12 | C13 |
|----------|-----|-----|-----|-----|-----|-----|-----|
| C14      |     |     |     |     |     |     |     |
| grid # 1 | 96  | 82  | 72  | 111 | 89  | 87  | 87  |
| 89       |     |     |     |     |     |     |     |
| grid # 2 | 104 | 92  | 78  | 123 | 97  | 95  | 95  |
| 95       |     |     |     |     |     |     |     |
| grid # 3 | 214 | 176 | 146 | 256 | 181 | 182 | 182 |
| 183      |     |     |     |     |     |     |     |
| grid # 4 | 393 | 295 | 276 | 448 | 326 | 326 | 327 |
| 326      |     |     |     |     |     |     |     |

number of gridpoints:

| atom     | C15 | H19 | H20 | H21 | H22 | H23 | H24 |
|----------|-----|-----|-----|-----|-----|-----|-----|
| H25      |     |     |     |     |     |     |     |
| grid # 1 | 89  | 73  | 71  | 73  | 73  | 73  | 71  |
| 71       |     |     |     |     |     |     |     |
| grid # 2 | 96  | 111 | 113 | 118 | 118 | 118 | 108 |
| 110      |     |     |     |     |     |     |     |



```

grid # 3      181    213    212    223    223    224    218
215
grid # 4      326    213    209    223    224    224    219
214

```

number of gridpoints:

| atom     | H11 | H2  | H5  | H8  | total |
|----------|-----|-----|-----|-----|-------|
| grid # 1 | 70  | 71  | 70  | 71  | 2868  |
| grid # 2 | 108 | 111 | 105 | 111 | 3721  |
| grid # 3 | 218 | 217 | 214 | 215 | 7189  |
| grid # 4 | 215 | 215 | 208 | 221 | 9940  |

end of program grid

start of program rwr  
end of program rwr

start of program scf

|      | i | u | d | i | g |                  | energy  | RMS     | maximum |
|------|---|---|---|---|---|------------------|---------|---------|---------|
|      | t | p | i | c | r |                  | change  | density | DIIS    |
|      | e | d | i | u | i | total energy     |         | change  | error   |
|      | r | t | s | t | d |                  |         |         |         |
| etot | 1 | N | N | 2 | U | -783.02396153890 |         | 2.5E-04 | 8.1E-03 |
| etot | 2 | Y | Y | 6 | M | -783.03253844321 | 8.6E-03 | 9.8E-05 | 2.0E-03 |
| etot | 3 | N | Y | 2 | U | -783.03347133509 | 9.3E-04 | 2.7E-05 | 4.6E-04 |
| etot | 4 | Y | Y | 6 | M | -783.03354015458 | 6.9E-05 | 1.4E-05 | 2.8E-04 |
| etot | 5 | Y | Y | 6 | M | -783.03356027524 | 2.0E-05 | 4.8E-06 | 1.3E-04 |
| etot | 6 | Y | N | 6 | M | -783.03356181976 | 1.5E-06 | 0.0E+00 | 0.0E+00 |

Energy components, in hartrees:

|     |                               |                   |       |
|-----|-------------------------------|-------------------|-------|
| (A) | Nuclear repulsion.....        | 1393.10327228684  |       |
| (E) | Total one-electron terms..... | -3830.69474562281 |       |
| (I) | Total two-electron terms..... | 1654.55791151620  |       |
| (L) | Electronic energy.....        | -2176.13683410660 | (E+I) |
| (N) | Total energy.....             | -783.03356181976  | (A+L) |

SCFE: SCF energy: HF -783.03356181976 hartrees iterations:  
6

HOMO energy: -0.29940  
LUMO energy: 0.12704

Orbital energies:

|           |           |           |           |           |           |
|-----------|-----------|-----------|-----------|-----------|-----------|
| -20.52541 | -15.60144 | -11.34539 | -11.28611 | -11.25740 | -11.25167 |
| -11.24347 | -11.24239 | -11.24230 | -11.23672 | -11.23623 | -11.23579 |
| -11.23393 | -11.23383 | -11.23319 | -11.23280 | -11.23220 | -11.22706 |

|           |          |          |          |          |          |
|-----------|----------|----------|----------|----------|----------|
| -11.20725 | -1.39706 | -1.26918 | -1.16880 | -1.14742 | -1.10650 |
| -1.03080  | -1.01943 | -1.01784 | -1.01531 | -0.95999 | -0.93253 |
| -0.85923  | -0.83920 | -0.83194 | -0.82944 | -0.79054 | -0.74325 |
| -0.71226  | -0.69652 | -0.68087 | -0.66436 | -0.64103 | -0.63702 |
| -0.62861  | -0.61710 | -0.61129 | -0.60385 | -0.59901 | -0.58754 |
| -0.57038  | -0.56148 | -0.54947 | -0.54029 | -0.52930 | -0.51969 |
| -0.51383  | -0.50497 | -0.50000 | -0.49697 | -0.48412 | -0.46944 |
| -0.46811  | -0.42155 | -0.41221 | -0.34350 | -0.33551 | -0.32674 |
| -0.29940  | 0.12704  | 0.13573  | 0.14142  | 0.15107  | 0.20583  |
| 0.23649   | 0.24157  | 0.25374  | 0.26146  | 0.27434  |          |

end of program scf

start of program derla  
end of program derla

start of program rwr  
end of program rwr

start of program derlb

forces (hartrees/bohr) : total

| atom | label | x             | y             | z             |
|------|-------|---------------|---------------|---------------|
| 1    | H1    | -2.135083E-04 | -6.286168E-04 | -1.873390E-03 |
| 2    | C1    | -6.687103E-05 | 1.272085E-03  | 3.376783E-03  |
| 3    | C2    | 1.499807E-03  | -2.401160E-03 | -1.430940E-03 |
| 4    | C3    | 1.182469E-03  | -1.603749E-05 | 2.695036E-04  |
| 5    | C4    | 7.283216E-04  | -6.322224E-04 | 3.674155E-03  |
| 6    | C5    | -6.550520E-04 | -1.490156E-03 | -4.181160E-03 |
| 7    | C6    | -5.047128E-03 | 2.828756E-04  | -2.625254E-03 |
| 8    | C7    | -1.344135E-03 | 2.038558E-03  | 1.464306E-03  |
| 9    | H3    | -3.101026E-04 | 1.009778E-03  | -8.461383E-04 |
| 10   | H4    | -2.484883E-04 | 1.108742E-03  | 6.235260E-06  |
| 11   | H6    | 4.510337E-04  | 5.211168E-04  | 1.026954E-03  |
| 12   | H7    | 2.020119E-03  | 1.971991E-04  | 2.543763E-04  |
| 13   | C10   | 2.189480E-03  | -2.636749E-04 | -4.225802E-04 |
| 14   | C8    | 7.482780E-04  | 4.611776E-04  | -1.449033E-03 |
| 15   | C16   | -3.769310E-04 | -1.057411E-03 | -9.703906E-04 |
| 16   | H12   | -1.103899E-03 | 2.426389E-04  | 1.347781E-04  |
| 17   | N2    | 4.829313E-03  | 4.616149E-03  | 8.912314E-03  |
| 18   | C9    | 3.445797E-04  | -5.608668E-03 | -7.134717E-04 |
| 19   | C17   | -2.991962E-03 | 1.110806E-03  | -5.145103E-04 |
| 20   | O1    | -1.413909E-03 | -1.207804E-04 | -1.398680E-04 |
| 21   | C11   | -1.568916E-03 | 9.463753E-04  | 2.340554E-03  |
| 22   | C12   | -4.802509E-04 | -3.477659E-04 | -9.896520E-04 |
| 23   | C13   | -2.955854E-03 | -1.538581E-03 | -3.242750E-03 |
| 24   | C14   | 5.462180E-04  | 6.582222E-04  | 1.378059E-03  |

|       |       |               |               |               |
|-------|-------|---------------|---------------|---------------|
| 25    | C15   | 2.832434E-03  | 1.522608E-03  | 3.031645E-03  |
| 26    | H19   | 8.693128E-04  | -8.789744E-05 | -2.374359E-04 |
| 27    | H20   | -1.030753E-03 | 5.361218E-04  | 1.077201E-03  |
| 28    | H21   | -7.931738E-04 | 5.687433E-06  | -7.818673E-05 |
| 29    | H22   | 8.058104E-04  | -4.179961E-04 | -9.483579E-04 |
| 30    | H23   | -7.510830E-04 | -5.576272E-04 | -1.255846E-03 |
| 31    | H24   | -7.739141E-04 | -3.586916E-04 | -9.097780E-05 |
| 32    | H25   | 1.010692E-03  | 2.653832E-04  | 1.233505E-03  |
| 33    | H11   | 2.077589E-04  | -2.002025E-06 | -6.036245E-04 |
| 34    | H2    | -3.738108E-04 | -1.168466E-03 | 1.214606E-03  |
| 35    | H5    | -9.437069E-04 | 2.451644E-03  | -3.559883E-03 |
| 36    | H8    | 2.838689E-03  | -1.928587E-03 | -3.607719E-03 |
| ----- |       | -----         | -----         | -----         |
|       | total | -3.391319E-04 | 6.208253E-04  | -3.861949E-04 |

end of program derlb

start of program geopt 3

geometry optimization step 3

reading input hessian of dimension 108  
in five columns format  
reading input hessian of dimension 108  
in five columns format

energy change: -1.6481E-03 . ( 5.0000E-05 )  
gradient maximum: 6.4471E-03 . ( 4.5000E-04 )  
gradient rms: 1.6599E-03 . ( 3.0000E-04 )  
step size: 0.19130 trust radius: 0.30000  
displacement maximum: 9.0660E-02 . ( 1.8000E-03 )  
displacement rms: 1.7320E-02 . ( 1.2000E-03 )  
predicted energy change: -7.7858E-04 geom step: 1.9130E-01  
01 full step: 1.9130E-01  
molecular structure not yet converged...

center of mass moved by:

x: -1.8114E-02 y: -8.1882E-04 z: 1.1302E-02

new geometry:

|      | angstroms     |               |               |
|------|---------------|---------------|---------------|
| atom | x             | y             | z             |
| H1   | -0.4810339862 | 1.5257582202  | -1.9167092479 |
| C1   | -0.3339796612 | 1.9181339032  | -0.9275601628 |
| C2   | 0.0423770935  | 2.9175841717  | 1.6233004643  |
| C3   | 0.1189373497  | 1.0655750957  | 0.0689496770  |
| C4   | -0.5984003844 | 3.2543896566  | -0.6719346318 |
| C5   | -0.4156742103 | 3.7473700122  | 0.6122914681  |
| C6   | 0.3250922697  | 1.5800317689  | 1.3603772029  |
| C7   | 0.4527981714  | -0.4006110329 | -0.1860537094 |
| H3   | -0.9449965946 | 3.8951269503  | -1.4628265883 |

|     |               |               |               |
|-----|---------------|---------------|---------------|
| H4  | -0.6305146138 | 4.7772795814  | 0.8361541113  |
| H6  | 0.1722817442  | 3.3105569415  | 2.6116210618  |
| H7  | 1.5262446133  | -0.4724952140 | -0.3510294500 |
| C10 | -0.2284305219 | -0.9781573592 | -1.4204445662 |
| C8  | 0.1276214510  | -1.2168574902 | 1.0828646874  |
| C16 | 0.4921751453  | -2.6969247138 | 0.9600671814  |
| H12 | -0.9430416440 | -1.1247018016 | 1.2692857665  |
| N2  | 0.8437067692  | 0.7545844969  | 2.3799616384  |
| C9  | 0.8036421222  | -0.6119377014 | 2.3011783548  |
| C17 | 1.4726859672  | 1.3538279381  | 3.5369585070  |
| O1  | 1.2390859482  | -1.2996421355 | 3.1843107993  |
| C11 | -1.4532785525 | -2.0845951657 | -3.6776755845 |
| C12 | 0.5307447023  | -1.4479703913 | -2.4850535303 |
| C13 | -1.6177973586 | -1.0650498493 | -1.5067746423 |
| C14 | -2.2241218692 | -1.6138374925 | -2.6209750778 |
| C15 | -0.0759791970 | -1.9979890625 | -3.6073514470 |
| H19 | 1.6052069831  | -1.3858525141 | -2.4350342566 |
| H20 | -2.2281959107 | -0.6877537230 | -0.7050068944 |
| H21 | -3.2976678299 | -1.6713595500 | -2.6685688827 |
| H22 | 0.5328768331  | -2.3578550922 | -4.4178188995 |
| H23 | -1.9272904951 | -2.5111691737 | -4.5436378292 |
| H24 | 1.5516876072  | -2.8163314176 | 0.7710831785  |
| H25 | -0.0548617301 | -3.1543687675 | 0.1488952484  |
| H11 | 0.2639130229  | -3.2170830264 | 1.8769975447  |
| H2  | 2.1177939383  | 2.1663984479  | 3.2394997253  |
| H5  | 2.0589537749  | 0.5959601453  | 4.0127485234  |
| H8  | 0.7382133693  | 1.7298099622  | 4.2350977493  |

nuclear repulsion energy..... 1393.760434242 hartrees

-----  
 / end of geometry optimization iteration 3 /  
 -----

end of program geopt

start of program onee

smallest eigenvalue of S: 3.378E-04

number of canonical orbitals..... 368

end of program onee

start of program probe

end of program probe

start of program grid

number of gridpoints:

|    | atom | H1 | C1 | C2 | C3 | C4 | C5 | C6 |
|----|------|----|----|----|----|----|----|----|
| C7 |      |    |    |    |    |    |    |    |

|     |          |     |     |     |     |     |     |     |
|-----|----------|-----|-----|-----|-----|-----|-----|-----|
| 82  | grid # 1 | 71  | 86  | 89  | 88  | 89  | 89  | 87  |
| 91  | grid # 2 | 113 | 96  | 96  | 98  | 97  | 97  | 94  |
| 175 | grid # 3 | 213 | 184 | 184 | 192 | 183 | 184 | 190 |
| 313 | grid # 4 | 213 | 327 | 328 | 341 | 328 | 328 | 327 |

|                       |          |     |     |     |     |     |     |     |
|-----------------------|----------|-----|-----|-----|-----|-----|-----|-----|
| number of gridpoints: |          |     |     |     |     |     |     |     |
| H12                   | atom     | H3  | H4  | H6  | H7  | C10 | C8  | C16 |
| 68                    | grid # 1 | 73  | 73  | 70  | 67  | 92  | 81  | 71  |
| 110                   | grid # 2 | 118 | 118 | 112 | 106 | 100 | 91  | 79  |
| 213                   | grid # 3 | 223 | 223 | 208 | 211 | 192 | 173 | 153 |
| 208                   | grid # 4 | 224 | 223 | 208 | 208 | 337 | 313 | 288 |

|                       |          |     |     |     |     |     |     |     |
|-----------------------|----------|-----|-----|-----|-----|-----|-----|-----|
| number of gridpoints: |          |     |     |     |     |     |     |     |
| C14                   | atom     | N2  | C9  | C17 | O1  | C11 | C12 | C13 |
| 89                    | grid # 1 | 97  | 81  | 69  | 111 | 89  | 87  | 87  |
| 95                    | grid # 2 | 106 | 91  | 79  | 122 | 97  | 95  | 95  |
| 183                   | grid # 3 | 209 | 176 | 142 | 256 | 181 | 183 | 183 |
| 326                   | grid # 4 | 391 | 292 | 270 | 449 | 326 | 326 | 326 |

|                       |          |     |     |     |     |     |     |     |
|-----------------------|----------|-----|-----|-----|-----|-----|-----|-----|
| number of gridpoints: |          |     |     |     |     |     |     |     |
| H25                   | atom     | C15 | H19 | H20 | H21 | H22 | H23 | H24 |
| 71                    | grid # 1 | 89  | 73  | 71  | 73  | 73  | 73  | 71  |
| 110                   | grid # 2 | 96  | 111 | 113 | 118 | 118 | 118 | 108 |
| 215                   | grid # 3 | 181 | 213 | 212 | 223 | 223 | 224 | 218 |
| 212                   | grid # 4 | 326 | 213 | 211 | 223 | 224 | 224 | 217 |

|                       |          |     |     |     |     |       |
|-----------------------|----------|-----|-----|-----|-----|-------|
| number of gridpoints: |          |     |     |     |     |       |
|                       | atom     | H11 | H2  | H5  | H8  | total |
|                       | grid # 1 | 70  | 71  | 70  | 71  | 2862  |
|                       | grid # 2 | 108 | 111 | 107 | 111 | 3725  |
|                       | grid # 3 | 218 | 215 | 212 | 217 | 7185  |
|                       | grid # 4 | 214 | 213 | 209 | 215 | 9921  |

end of program grid

start of program rwr

end of program rwr

start of program scf

|      | i | u | d | i | g |                  | RMS      | maximum |
|------|---|---|---|---|---|------------------|----------|---------|
|      | t | p | i | c | r |                  | density  | DIIS    |
|      | e | d | i | u | i | energy           | change   | error   |
|      | r | t | s | t | d | total energy     |          |         |
| etot | 1 | N | N | 2 | U | -783.02286010499 | 2.3E-04  | 7.8E-03 |
| etot | 2 | Y | Y | 6 | M | -783.03264117030 | 9.8E-03  | 2.2E-03 |
| etot | 3 | N | Y | 2 | U | -783.03377403359 | 1.1E-03  | 4.9E-04 |
| etot | 4 | Y | Y | 6 | M | -783.03381452766 | 4.0E-05  | 2.4E-04 |
| etot | 5 | Y | Y | 6 | M | -783.03382670949 | 1.2E-05  | 9.0E-05 |
| etot | 6 | Y | N | 6 | M | -783.03382610167 | -6.1E-07 | 0.0E+00 |

Energy components, in hartrees:

|     |                               |                   |       |
|-----|-------------------------------|-------------------|-------|
| (A) | Nuclear repulsion.....        | 1393.76043424191  |       |
| (E) | Total one-electron terms..... | -3831.98161857135 |       |
| (I) | Total two-electron terms..... | 1655.18735822777  |       |
| (L) | Electronic energy.....        | -2176.79426034358 | (E+I) |
| (N) | Total energy.....             | -783.03382610167  | (A+L) |

SCFE: SCF energy: HF -783.03382610167 hartrees iterations:  
6

HOMO energy: -0.29979  
LUMO energy: 0.12673

Orbital energies:

|           |           |           |           |           |           |
|-----------|-----------|-----------|-----------|-----------|-----------|
| -20.52581 | -15.60027 | -11.34577 | -11.28550 | -11.25255 | -11.25155 |
| -11.24410 | -11.24330 | -11.24259 | -11.23777 | -11.23670 | -11.23623 |
| -11.23441 | -11.23430 | -11.23381 | -11.23348 | -11.23288 | -11.22814 |
| -11.20684 | -1.39706  | -1.27012  | -1.16894  | -1.14730  | -1.10682  |
| -1.03052  | -1.01961  | -1.01827  | -1.01547  | -0.96174  | -0.93277  |
| -0.85958  | -0.83870  | -0.83166  | -0.82951  | -0.79016  | -0.74337  |
| -0.71244  | -0.69682  | -0.68132  | -0.66484  | -0.64236  | -0.63731  |
| -0.62812  | -0.61778  | -0.61201  | -0.60438  | -0.60105  | -0.58872  |
| -0.56985  | -0.56144  | -0.54940  | -0.54017  | -0.52908  | -0.52156  |
| -0.51436  | -0.50511  | -0.49970  | -0.49682  | -0.48415  | -0.46952  |
| -0.46852  | -0.42042  | -0.41259  | -0.34362  | -0.33586  | -0.32674  |
| -0.29979  | 0.12673   | 0.13548   | 0.14114   | 0.15127   | 0.20370   |
| 0.23597   | 0.24182   | 0.25305   | 0.26258   | 0.27471   |           |

end of program scf

start of program derla  
end of program derla

start of program rwr  
end of program rwr

start of program der1b

forces (hartrees/bohr) : total

| atom | label | x             | y             | z             |
|------|-------|---------------|---------------|---------------|
| 1    | H1    | 1.314618E-04  | 9.671254E-04  | 1.357224E-04  |
| 2    | C1    | 6.049239E-04  | -7.423106E-04 | 2.267646E-03  |
| 3    | C2    | -5.586920E-04 | -2.195561E-03 | -2.866624E-03 |
| 4    | C3    | 1.724278E-03  | 9.133594E-04  | 3.740969E-03  |
| 5    | C4    | 6.232382E-04  | 1.998658E-03  | 5.298173E-03  |
| 6    | C5    | -5.388110E-04 | -2.128700E-03 | -4.468745E-03 |
| 7    | C6    | -1.933875E-03 | 2.555391E-04  | -5.389692E-03 |
| 8    | C7    | -3.113262E-03 | 1.337530E-03  | -1.467681E-04 |
| 9    | H3    | -1.260533E-04 | 2.541355E-04  | 3.724507E-04  |
| 10   | H4    | 3.644154E-05  | 2.435567E-04  | -3.499960E-04 |
| 11   | H6    | -8.917927E-05 | 9.206511E-04  | 4.131060E-04  |
| 12   | H7    | 1.059598E-03  | 2.667708E-04  | 5.567965E-04  |
| 13   | C10   | 1.542757E-03  | -2.641351E-04 | -6.815840E-04 |
| 14   | C8    | 2.542714E-04  | -5.219931E-04 | -3.295019E-03 |
| 15   | C16   | -1.259003E-03 | 2.188755E-03  | 1.362962E-03  |
| 16   | H12   | 6.800257E-04  | -5.669417E-04 | 4.131426E-04  |
| 17   | N2    | 2.132449E-05  | -5.914599E-04 | -1.062572E-02 |
| 18   | C9    | -1.768636E-03 | -1.696436E-03 | 6.599596E-03  |
| 19   | C17   | 9.235317E-04  | 7.418552E-04  | 2.358667E-03  |
| 20   | O1    | 7.285951E-04  | 2.708922E-04  | -1.981693E-03 |
| 21   | C11   | -1.411606E-03 | 2.066161E-04  | 6.762982E-04  |
| 22   | C12   | -8.796131E-04 | 9.770619E-04  | 2.148481E-03  |
| 23   | C13   | 7.816499E-04  | 2.121748E-04  | -1.527311E-04 |
| 24   | C14   | 3.805430E-04  | -3.103672E-04 | -9.273715E-04 |
| 25   | C15   | 9.994358E-04  | 2.473726E-04  | 7.605118E-04  |
| 26   | H19   | -6.063186E-04 | -3.012661E-04 | -5.747651E-04 |
| 27   | H20   | -5.654176E-05 | -2.808744E-04 | 7.073214E-05  |
| 28   | H21   | 8.476526E-05  | -1.532948E-04 | -1.852192E-04 |
| 29   | H22   | -1.040160E-04 | -4.863888E-05 | -3.798131E-04 |
| 30   | H23   | -7.441393E-05 | -1.152353E-04 | -2.505133E-04 |
| 31   | H24   | 1.825881E-03  | -5.690465E-05 | -6.010807E-04 |
| 32   | H25   | -8.969310E-04 | -7.389695E-04 | -1.181854E-03 |
| 33   | H11   | -4.141372E-04 | -7.905244E-04 | 1.401117E-03  |
| 34   | H2    | 8.667737E-04  | 1.994440E-03  | -2.484903E-03 |
| 35   | H5    | 2.107900E-03  | -2.477809E-03 | 4.488441E-03  |
| 36   | H8    | -1.739512E-03 | 5.914137E-04  | 3.020846E-03  |

-----  
total -1.932030E-04 6.064846E-04 -4.584316E-04

end of program derlb

start of program geopt 4

geometry optimization step 4  
reading input hessian of dimension 108  
in five columns format  
reading input hessian of dimension 108  
in five columns format

Level shifts adjusted to satisfy step-size constraints  
Step size: 0.3003236  
Cos(theta): 0.2649517

Final level shift: -1.4878527E-03

energy change: -2.6428E-04 . ( 5.0000E-05 )  
gradient maximum: 7.2633E-03 . ( 4.5000E-04 )  
gradient rms: 1.6929E-03 . ( 3.0000E-04 )  
step size: 0.30029 trust radius: 0.30000  
displacement maximum: 1.6195E-01 . ( 1.8000E-03 )  
displacement rms: 2.7187E-02 . ( 1.2000E-03 )  
predicted energy change: -8.1092E-04 geom step: 3.0029E-  
01 full step: 3.0029E-01  
molecular structure not yet converged...

center of mass moved by:  
x: 1.4205E-02 y: -2.6951E-04 z: -8.0476E-03

new geometry:

|      | angstroms     |               |               |
|------|---------------|---------------|---------------|
| atom | x             | y             | z             |
| H1   | -0.5741894742 | 1.5311294878  | -1.8959211973 |
| C1   | -0.3872706475 | 1.9180168576  | -0.9092972026 |
| C2   | 0.0928444108  | 2.9243636689  | 1.6023522802  |
| C3   | 0.1069356853  | 1.0682445418  | 0.0698798477  |
| C4   | -0.6438703943 | 3.2545368402  | -0.6549007642 |
| C5   | -0.4073826722 | 3.7516896589  | 0.6081636780  |
| C6   | 0.3593469855  | 1.5870256104  | 1.3420964774  |
| C7   | 0.4351587469  | -0.3968759049 | -0.1810498442 |
| H3   | -1.0244407892 | 3.8903505694  | -1.4368993563 |
| H4   | -0.6086934411 | 4.7834090232  | 0.8338521452  |
| H6   | 0.2704473148  | 3.3309097414  | 2.5792858946  |
| H7   | 1.5126620536  | -0.4701482045 | -0.3345536365 |
| C10  | -0.2324392502 | -0.9787486074 | -1.4188954455 |
| C8   | 0.1108144953  | -1.2091894280 | 1.0905569998  |
| C16  | 0.4435446615  | -2.6989470889 | 0.9774640406  |



|     |               |               |               |
|-----|---------------|---------------|---------------|
| H12 | -0.9536145665 | -1.0997855768 | 1.2965471047  |
| N2  | 0.9363665186  | 0.7613881271  | 2.3365852233  |
| C9  | 0.8110259309  | -0.6157008344 | 2.3049248570  |
| C17 | 1.4719386588  | 1.3495066011  | 3.5490732344  |
| O1  | 1.2244700189  | -1.3159682051 | 3.1845865060  |
| C11 | -1.4392930901 | -2.0864862336 | -3.6800748517 |
| C12 | 0.5330437839  | -1.4137497881 | -2.4877189223 |
| C13 | -1.6201576226 | -1.1017219113 | -1.5030983223 |
| C14 | -2.2179690644 | -1.6509076119 | -2.6186343550 |
| C15 | -0.0626638857 | -1.9643287947 | -3.6118289968 |
| H19 | 1.6041376217  | -1.3271232115 | -2.4460389546 |
| H20 | -2.2360263230 | -0.7557801883 | -0.6930774560 |
| H21 | -3.2877925368 | -1.7387789371 | -2.6643193114 |
| H22 | 0.5491130851  | -2.2978165383 | -4.4310167547 |
| H23 | -1.9028605764 | -2.5145179891 | -4.5516882110 |
| H24 | 1.5010400703  | -2.8384862060 | 0.7609906527  |
| H25 | -0.1342900999 | -3.1594038315 | 0.1823564211  |
| H11 | 0.2258450513  | -3.2068361455 | 1.9106798927  |
| H2  | 2.1669291331  | 2.1388979138  | 3.2910220231  |
| H5  | 1.9784561252  | 0.5811564826  | 4.0907951097  |
| H8  | 0.6889962057  | 1.7556553424  | 4.1682989236  |

nuclear repulsion energy..... 1393.662818643 hartrees

-----  
 / end of geometry optimization iteration 4 /  
 -----

end of program geopt

start of program onee  
 smallest eigenvalue of S: 3.289E-04  
 number of canonical orbitals..... 368  
 end of program onee

start of program probe  
 end of program probe

start of program grid

number of gridpoints:

| atom     | H1  | C1  | C2  | C3  | C4  | C5  | C6  |
|----------|-----|-----|-----|-----|-----|-----|-----|
| C7       |     |     |     |     |     |     |     |
| grid # 1 | 71  | 87  | 89  | 89  | 89  | 87  | 85  |
| 82       |     |     |     |     |     |     |     |
| grid # 2 | 113 | 96  | 96  | 98  | 97  | 97  | 96  |
| 90       |     |     |     |     |     |     |     |
| grid # 3 | 213 | 184 | 184 | 193 | 183 | 183 | 189 |
| 175      |     |     |     |     |     |     |     |

grid # 4        212      327      327      341      327      328      327  
311

number of gridpoints:

atom            H3        H4        H6        H7        C10        C8        C16  
H12  
grid # 1        73        73        70        67        90        81        72  
68

grid # 2        118      118      111      106      100      91        79  
111

grid # 3        223      223      206      209      194      173      152  
212

grid # 4        224      223      206      205      339      311      291  
208

number of gridpoints:

atom            N2        C9        C17        O1        C11        C12        C13  
C14  
grid # 1        96        81        71        111      89        87        87  
89

grid # 2        105      91        79        123      97        95        95  
95

grid # 3        214      176      140      255      182      182      183  
182

grid # 4        392      293      272      449      326      326      326  
326

number of gridpoints:

atom            C15      H19      H20      H21      H22      H23      H24  
H25  
grid # 1        89        73        70        73        73        73        71  
71

grid # 2        96        112      113      118      118      118      109  
110

grid # 3        183      213      212      222      222      224      218  
215

grid # 4        326      212      210      223      224      224      221  
215

number of gridpoints:

| atom     | H11 | H2  | H5  | H8  | total |
|----------|-----|-----|-----|-----|-------|
| grid # 1 | 71  | 71  | 70  | 71  | 2860  |
| grid # 2 | 108 | 111 | 105 | 110 | 3725  |
| grid # 3 | 217 | 216 | 212 | 216 | 7180  |
| grid # 4 | 217 | 212 | 210 | 214 | 9925  |

end of program grid

start of program rwr

end of program rwr

start of program scf

|      | i | u | d | i | g |                  | RMS      | maximum |
|------|---|---|---|---|---|------------------|----------|---------|
|      | t | p | i | c | r |                  | density  | DIIS    |
|      | e | d | i | u | i | energy           | change   | error   |
|      | r | t | s | t | d | total energy     |          |         |
| etot | 1 | N | N | 2 | U | -783.02076627042 | 2.8E-04  | 8.2E-03 |
| etot | 2 | Y | Y | 6 | M | -783.03229248937 | 1.2E-02  | 2.0E-03 |
| etot | 3 | N | Y | 2 | U | -783.03364015340 | 1.3E-03  | 5.7E-04 |
| etot | 4 | Y | Y | 6 | M | -783.03374406665 | 1.0E-04  | 3.4E-04 |
| etot | 5 | Y | Y | 6 | M | -783.03376201163 | 1.8E-05  | 1.4E-04 |
| etot | 6 | Y | Y | 6 | M | -783.03376594486 | 3.9E-06  | 7.9E-05 |
| etot | 7 | Y | N | 6 | M | -783.03376576865 | -1.8E-07 | 0.0E+00 |

Energy components, in hartrees:

|     |                               |                   |       |
|-----|-------------------------------|-------------------|-------|
| (A) | Nuclear repulsion.....        | 1393.66281864334  |       |
| (E) | Total one-electron terms..... | -3831.79219849411 |       |
| (I) | Total two-electron terms..... | 1655.09561408212  |       |
| (L) | Electronic energy.....        | -2176.69658441199 | (E+I) |
| (N) | Total energy.....             | -783.03376576865  | (A+L) |

SCFE: SCF energy: HF -783.03376576865 hartrees iterations:  
7

HOMO energy: -0.30152  
LUMO energy: 0.12782

Orbital energies:

|           |           |           |           |           |           |
|-----------|-----------|-----------|-----------|-----------|-----------|
| -20.52926 | -15.60071 | -11.34805 | -11.28444 | -11.25259 | -11.25119 |
| -11.24331 | -11.24319 | -11.24158 | -11.23620 | -11.23565 | -11.23539 |
| -11.23386 | -11.23329 | -11.23293 | -11.23271 | -11.23215 | -11.22674 |
| -11.20879 | -1.39909  | -1.26831  | -1.16950  | -1.14886  | -1.10667  |
| -1.03004  | -1.02111  | -1.01931  | -1.01489  | -0.95928  | -0.93237  |
| -0.85937  | -0.83628  | -0.83166  | -0.83027  | -0.79032  | -0.74283  |
| -0.71213  | -0.69679  | -0.68130  | -0.66512  | -0.64215  | -0.63633  |
| -0.62842  | -0.61877  | -0.61323  | -0.60405  | -0.59873  | -0.58913  |
| -0.57006  | -0.56091  | -0.54946  | -0.54153  | -0.52949  | -0.52012  |
| -0.51396  | -0.50533  | -0.49985  | -0.49671  | -0.48380  | -0.47093  |
| -0.46770  | -0.42139  | -0.41378  | -0.34296  | -0.33606  | -0.32658  |
| -0.30152  | 0.12782   | 0.13665   | 0.14220   | 0.15236   | 0.20309   |
| 0.23581   | 0.24231   | 0.25343   | 0.26108   | 0.27459   |           |

end of program scf

start of program derla  
end of program derla

start of program rwr  
end of program rwr

start of program der1b

forces (hartrees/bohr) : total

| atom  | label | x             | y             | z             |
|-------|-------|---------------|---------------|---------------|
| 1     | H1    | 6.352968E-04  | -1.889626E-04 | 1.859963E-03  |
| 2     | C1    | 1.377328E-04  | -4.012983E-03 | -2.658770E-03 |
| 3     | C2    | -4.621400E-04 | 2.270741E-03  | 2.158568E-03  |
| 4     | C3    | -8.535699E-04 | -1.635754E-04 | -3.302643E-03 |
| 5     | C4    | -9.677492E-04 | 1.421920E-03  | -1.568678E-03 |
| 6     | C5    | 5.218389E-04  | 3.428473E-04  | 2.533169E-03  |
| 7     | C6    | 3.773198E-03  | -8.479563E-04 | 2.404846E-03  |
| 8     | C7    | 3.812582E-04  | -9.145352E-04 | -4.105280E-04 |
| 9     | H3    | 4.903229E-04  | -9.471783E-04 | 1.203937E-03  |
| 10    | H4    | 1.254032E-04  | 5.264778E-04  | 3.756103E-04  |
| 11    | H6    | -1.418602E-04 | 2.501739E-04  | -6.599184E-04 |
| 12    | H7    | -4.638474E-04 | 5.398471E-04  | 1.814164E-04  |
| 13    | C10   | -1.903113E-03 | 1.029659E-03  | 2.330879E-03  |
| 14    | C8    | -7.802332E-04 | -6.619837E-04 | 1.641672E-04  |
| 15    | C16   | -1.520110E-04 | -6.927149E-04 | -1.430489E-04 |
| 16    | H12   | -4.919678E-04 | -1.983353E-04 | -2.396040E-04 |
| 17    | N2    | -6.880136E-03 | -1.130366E-02 | -1.609391E-03 |
| 18    | C9    | 1.099385E-03  | 5.836080E-03  | -5.655803E-03 |
| 19    | C17   | 3.033194E-03  | 4.208754E-03  | -5.441974E-03 |
| 20    | O1    | 2.723844E-04  | 3.632215E-03  | 2.915732E-03  |
| 21    | C11   | 1.781632E-03  | -9.307048E-04 | -2.440900E-03 |
| 22    | C12   | 1.107748E-03  | 6.668911E-05  | 2.525691E-04  |
| 23    | C13   | 2.017820E-03  | 1.265329E-03  | 2.301579E-03  |
| 24    | C14   | -3.658147E-05 | -4.437323E-04 | -8.884726E-04 |
| 25    | C15   | -2.447402E-03 | -1.129841E-03 | -2.358924E-03 |
| 26    | H19   | 8.840447E-04  | 1.402795E-04  | 1.657628E-04  |
| 27    | H20   | -5.011866E-04 | 3.354365E-04  | 8.480332E-04  |
| 28    | H21   | -1.241199E-03 | 1.119685E-05  | 1.124635E-04  |
| 29    | H22   | 2.970430E-04  | -1.184714E-04 | -3.132704E-04 |
| 30    | H23   | 1.205196E-04  | -1.620186E-05 | 8.859471E-05  |
| 31    | H24   | -1.956572E-03 | -2.037392E-04 | 3.406483E-04  |
| 32    | H25   | 1.225083E-03  | 1.026667E-03  | 1.402165E-03  |
| 33    | H11   | 7.420147E-04  | 1.523856E-03  | -2.403144E-03 |
| 34    | H2    | 4.153655E-04  | 3.855323E-04  | 9.452504E-04  |
| 35    | H5    | 3.653025E-03  | -3.597237E-03 | 3.395932E-03  |
| 36    | H8    | -3.891349E-03 | 2.284840E-03  | 3.765373E-03  |
| total |       | -4.566080E-04 | 7.267322E-04  | -3.484093E-04 |

end of program der1b

start of program geopt 5

geometry optimization step 5

reading input hessian of dimension 108  
in five columns format  
reading input hessian of dimension 108  
in five columns format  
reading input hessian of dimension 108  
in five columns format

energy change: 6.0333E-05 . ( 5.0000E-05 )  
gradient maximum: 1.0034E-02 . ( 4.5000E-04 )  
gradient rms: 2.1000E-03 . ( 3.0000E-04 )  
step size: 0.17732 trust radius: 0.30000  
displacement maximum: 7.8977E-02 . ( 1.8000E-03 )  
displacement rms: 1.6054E-02 . ( 1.2000E-03 )  
predicted energy change: -6.8401E-04 geom step: 1.7732E-01  
01 full step: 1.7732E-01  
molecular structure not yet converged...

center of mass moved by:

x: -1.1450E-02 y: 1.0749E-03 z: 4.6143E-03

new geometry:

|      | angstroms     |               |               |
|------|---------------|---------------|---------------|
| atom | x             | y             | z             |
| H1   | -0.4730932560 | 1.5350165766  | -1.9158290603 |
| C1   | -0.3275788293 | 1.9202065735  | -0.9247678798 |
| C2   | 0.0543319924  | 2.9157761918  | 1.6106075534  |
| C3   | 0.1251553697  | 1.0652890804  | 0.0653554294  |
| C4   | -0.5914684395 | 3.2570810448  | -0.6692721484 |
| C5   | -0.4067538414 | 3.7484857155  | 0.6044012401  |
| C6   | 0.3357851171  | 1.5796445807  | 1.3477511057  |
| C7   | 0.4502828387  | -0.3981066979 | -0.1884948402 |
| H3   | -0.9386669555 | 3.8985984908  | -1.4586922504 |
| H4   | -0.6153448756 | 4.7809782350  | 0.8284326578  |
| H6   | 0.1923630363  | 3.3178388164  | 2.5956232074  |
| H7   | 1.5278289061  | -0.4677096856 | -0.3504033084 |
| C10  | -0.2322276233 | -0.9749156270 | -1.4184666642 |
| C8   | 0.1330303509  | -1.2221121495 | 1.0762712301  |
| C16  | 0.5116466057  | -2.6963499432 | 0.9540034854  |
| H12  | -0.9375953617 | -1.1467043574 | 1.2668584746  |
| N2   | 0.8744729145  | 0.7519777261  | 2.3569870427  |
| C9   | 0.8003008563  | -0.6146497365 | 2.3032178734  |
| C17  | 1.4470526069  | 1.3503032253  | 3.5548757175  |
| O1   | 1.2256186175  | -1.2956256324 | 3.1957796594  |
| C11  | -1.4687277699 | -2.0864590094 | -3.6695950566 |
| C12  | 0.5201354851  | -1.4410568514 | -2.4866410270 |
| C13  | -1.6211810237 | -1.0683464146 | -1.4973340029 |
| C14  | -2.2335827202 | -1.6196482610 | -2.6083679951 |

|     |               |               |               |
|-----|---------------|---------------|---------------|
| C15 | -0.0909871934 | -1.9931471858 | -3.6058524109 |
| H19 | 1.5945974571  | -1.3789666746 | -2.4483991559 |
| H20 | -2.2289642325 | -0.7000824047 | -0.6878915776 |
| H21 | -3.3076305048 | -1.6841393753 | -2.6485656306 |
| H22 | 0.5131845628  | -2.3499468974 | -4.4226590953 |
| H23 | -1.9457108667 | -2.5154181629 | -4.5343780038 |
| H24 | 1.5716217012  | -2.8053008675 | 0.7503882864  |
| H25 | -0.0387417979 | -3.1643301485 | 0.1483982341  |
| H11 | 0.3006114500  | -3.2188743651 | 1.8759625767  |
| H2  | 2.1198286508  | 2.1524761534  | 3.2805029773  |
| H5  | 1.9905818991  | 0.5893507757  | 4.0839702166  |
| H8  | 0.6781150609  | 1.7433694196  | 4.2088162262  |

nuclear repulsion energy..... 1394.194196772 hartrees

-----  
 / end of geometry optimization iteration 5 /  
 -----

end of program geopt

start of program onee  
 smallest eigenvalue of S: 3.280E-04  
 number of canonical orbitals..... 368  
 end of program onee

start of program probe  
 end of program probe

start of program grid

number of gridpoints:

| atom     | H1  | C1  | C2  | C3  | C4  | C5  | C6  |
|----------|-----|-----|-----|-----|-----|-----|-----|
| C7       |     |     |     |     |     |     |     |
| grid # 1 | 71  | 86  | 89  | 88  | 89  | 87  | 84  |
| 82       |     |     |     |     |     |     |     |
| grid # 2 | 113 | 96  | 96  | 98  | 97  | 97  | 95  |
| 90       |     |     |     |     |     |     |     |
| grid # 3 | 213 | 184 | 183 | 192 | 182 | 183 | 189 |
| 175      |     |     |     |     |     |     |     |
| grid # 4 | 213 | 327 | 328 | 338 | 327 | 328 | 326 |
| 312      |     |     |     |     |     |     |     |

number of gridpoints:

| atom     | H3  | H4  | H6  | H7  | C10 | C8 | C16 |
|----------|-----|-----|-----|-----|-----|----|-----|
| H12      |     |     |     |     |     |    |     |
| grid # 1 | 73  | 73  | 70  | 67  | 90  | 83 | 73  |
| 68       |     |     |     |     |     |    |     |
| grid # 2 | 118 | 118 | 112 | 106 | 100 | 91 | 80  |
| 111      |     |     |     |     |     |    |     |

|          |     |     |     |     |     |     |     |
|----------|-----|-----|-----|-----|-----|-----|-----|
| grid # 3 | 223 | 223 | 207 | 209 | 192 | 176 | 148 |
| 213      |     |     |     |     |     |     |     |
| grid # 4 | 224 | 223 | 207 | 203 | 337 | 309 | 286 |
| 209      |     |     |     |     |     |     |     |

number of gridpoints:

|          |     |     |     |     |     |     |     |
|----------|-----|-----|-----|-----|-----|-----|-----|
| atom     | N2  | C9  | C17 | O1  | C11 | C12 | C13 |
| C14      |     |     |     |     |     |     |     |
| grid # 1 | 96  | 81  | 69  | 111 | 89  | 87  | 87  |
| 89       |     |     |     |     |     |     |     |
| grid # 2 | 104 | 92  | 79  | 122 | 97  | 95  | 95  |
| 95       |     |     |     |     |     |     |     |
| grid # 3 | 211 | 176 | 145 | 255 | 181 | 182 | 183 |
| 183      |     |     |     |     |     |     |     |
| grid # 4 | 391 | 293 | 274 | 449 | 326 | 326 | 326 |
| 326      |     |     |     |     |     |     |     |

number of gridpoints:

|          |     |     |     |     |     |     |     |
|----------|-----|-----|-----|-----|-----|-----|-----|
| atom     | C15 | H19 | H20 | H21 | H22 | H23 | H24 |
| H25      |     |     |     |     |     |     |     |
| grid # 1 | 89  | 73  | 71  | 73  | 73  | 73  | 71  |
| 71       |     |     |     |     |     |     |     |
| grid # 2 | 96  | 111 | 113 | 118 | 118 | 118 | 108 |
| 110      |     |     |     |     |     |     |     |
| grid # 3 | 182 | 213 | 212 | 223 | 223 | 224 | 218 |
| 215      |     |     |     |     |     |     |     |
| grid # 4 | 326 | 213 | 209 | 223 | 224 | 224 | 218 |
| 212      |     |     |     |     |     |     |     |

number of gridpoints:

|          |     |     |     |     |       |
|----------|-----|-----|-----|-----|-------|
| atom     | H11 | H2  | H5  | H8  | total |
| grid # 1 | 70  | 71  | 70  | 71  | 2858  |
| grid # 2 | 108 | 111 | 106 | 110 | 3724  |
| grid # 3 | 218 | 216 | 212 | 216 | 7180  |
| grid # 4 | 214 | 213 | 209 | 215 | 9908  |

end of program grid

start of program rwr  
end of program rwr

start of program scf

|      |   |   |   |   |              |                  |         |         |
|------|---|---|---|---|--------------|------------------|---------|---------|
|      | i | u | d | i | g            |                  |         |         |
|      | t | p | i | c | r            |                  | RMS     | maximum |
|      | e | d | i | u | i            | energy           | density | DIIS    |
|      | r | t | s | t | d            | change           | change  | error   |
|      |   |   |   |   | total energy |                  |         |         |
| etot | 1 | N | N | 2 | U            | -783.02750102839 | 1.9E-04 | 6.0E-03 |
| etot | 2 | Y | Y | 6 | M            | -783.03345176139 | 8.3E-05 | 2.2E-03 |

```

etot   3   N   Y   2   U  -783.03421229436   7.6E-04   2.4E-05   5.6E-04
etot   4   Y   Y   6   M  -783.03425171005   3.9E-05   1.2E-05   2.6E-04
etot   5   Y   Y   6   M  -783.03426675380   1.5E-05   4.2E-06   8.1E-05
etot   6   Y   N   6   M  -783.03426604715  -7.1E-07   0.0E+00   0.0E+00

```

Energy components, in hartrees:

```

(A) Nuclear repulsion..... 1394.19419677164
(E) Total one-electron terms..... -3832.86176139766
(I) Total two-electron terms..... 1655.63329857887
(L) Electronic energy..... -2177.22846281879 (E+I)
(N) Total energy..... -783.03426604715 (A+L)

```

SCFE: SCF energy: HF -783.03426604715 hartrees iterations:  
6

HOMO energy: -0.30086  
LUMO energy: 0.12726

Orbital energies:

```

-20.52569 -15.60040 -11.34599 -11.28463 -11.25396 -11.25140
-11.24376 -11.24353 -11.24126 -11.23667 -11.23630 -11.23621
-11.23405 -11.23381 -11.23357 -11.23354 -11.23223 -11.22664
-11.20764 -1.39696 -1.26844 -1.16951 -1.14874 -1.10737
-1.03115 -1.02062 -1.01842 -1.01502 -0.96030 -0.93307
-0.85937 -0.83861 -0.83170 -0.83009 -0.79021 -0.74311
-0.71249 -0.69635 -0.68098 -0.66511 -0.64158 -0.63626
-0.62870 -0.61777 -0.61248 -0.60426 -0.59881 -0.58805
-0.57028 -0.56129 -0.54879 -0.54063 -0.52916 -0.52066
-0.51449 -0.50558 -0.49997 -0.49661 -0.48390 -0.47084
-0.46838 -0.42066 -0.41263 -0.34339 -0.33608 -0.32659
-0.30086 0.12726 0.13637 0.14155 0.15174 0.20458
0.23573 0.24178 0.25271 0.26189 0.27471

```

end of program scf

start of program derla  
end of program derla

start of program rwr  
end of program rwr

start of program derlb

forces (hartrees/bohr) : total

```

atom  label          x          y          z
-----

```



|       |       |               |               |               |
|-------|-------|---------------|---------------|---------------|
| 1     | H1    | -3.816687E-04 | 9.176652E-05  | -5.209111E-04 |
| 2     | C1    | -4.387183E-04 | 2.911026E-05  | -1.166443E-03 |
| 3     | C2    | 4.664693E-04  | 8.543396E-05  | 1.487278E-03  |
| 4     | C3    | -7.310630E-04 | 3.704576E-04  | -1.843909E-04 |
| 5     | C4    | -5.561690E-04 | -1.030513E-04 | -2.391189E-03 |
| 6     | C5    | 2.271547E-04  | 1.243283E-03  | 1.979541E-03  |
| 7     | C6    | 1.396023E-03  | 9.523323E-04  | 1.911361E-03  |
| 8     | C7    | 1.985156E-03  | -5.739051E-04 | 2.411974E-04  |
| 9     | H3    | -1.880618E-04 | -5.322325E-05 | -4.299891E-04 |
| 10    | H4    | 8.022218E-05  | -8.167765E-04 | -1.446346E-04 |
| 11    | H6    | 1.003403E-04  | -4.913884E-04 | -2.237230E-04 |
| 12    | H7    | -1.168444E-03 | -1.825105E-04 | 2.017480E-05  |
| 13    | C10   | 2.105611E-04  | -4.060455E-04 | -1.034686E-03 |
| 14    | C8    | -2.377387E-04 | 7.518305E-04  | 1.473918E-03  |
| 15    | C16   | -1.038249E-04 | -5.617158E-04 | 1.363690E-05  |
| 16    | H12   | 3.365015E-05  | 1.666225E-05  | 9.739531E-06  |
| 17    | N2    | -1.034658E-03 | 9.756522E-04  | -2.811521E-04 |
| 18    | C9    | 1.422291E-03  | -4.468535E-04 | 1.351534E-03  |
| 19    | C17   | 8.001469E-04  | 4.082844E-04  | -7.382558E-04 |
| 20    | O1    | -1.407451E-03 | -1.164586E-03 | -1.703011E-03 |
| 21    | C11   | -4.800767E-04 | -7.375261E-05 | -3.246766E-04 |
| 22    | C12   | 3.266542E-04  | -2.254225E-04 | -5.817589E-04 |
| 23    | C13   | -9.659120E-04 | -1.051850E-04 | 1.827135E-04  |
| 24    | C14   | -2.573035E-04 | 1.423362E-04  | 3.598998E-04  |
| 25    | C15   | 5.329591E-04  | -1.163979E-04 | -3.226177E-04 |
| 26    | H19   | -2.657218E-04 | 1.244054E-04  | 7.701009E-05  |
| 27    | H20   | 3.652363E-04  | -2.042697E-04 | -7.531744E-04 |
| 28    | H21   | 5.024247E-04  | 6.073941E-05  | 5.217940E-05  |
| 29    | H22   | -2.060279E-04 | 2.515308E-04  | 5.362930E-04  |
| 30    | H23   | 3.263884E-04  | 2.899916E-04  | 6.034378E-04  |
| 31    | H24   | 6.741604E-04  | 8.124307E-05  | -1.654580E-04 |
| 32    | H25   | -3.649737E-04 | -9.768345E-05 | -1.094634E-04 |
| 33    | H11   | -2.388963E-04 | 1.536885E-04  | 1.726793E-04  |
| 34    | H2    | -2.194149E-05 | 4.522229E-04  | -7.103327E-04 |
| 35    | H5    | 6.185348E-04  | -5.346366E-04 | 1.621277E-04  |
| 36    | H8    | -1.389617E-03 | 5.333895E-04  | 8.172180E-04  |
| ----- |       | -----         | -----         | -----         |
|       | total | -3.698949E-04 | 8.569570E-04  | -3.339279E-04 |

end of program der1b

start of program geopt 6

geometry optimization step 6

reading input hessian of dimension 108  
in five columns format  
reading input hessian of dimension 108  
in five columns format

energy change: -5.0028E-04 . ( 5.0000E-05 )

gradient maximum: 5.0487E-03 . ( 4.5000E-04 )  
 gradient rms: 8.9609E-04 . ( 3.0000E-04 )  
 step size: 0.13770 trust radius: 0.30000  
 displacement maximum: 6.1744E-02 . ( 1.8000E-03 )  
 displacement rms: 1.2466E-02 . ( 1.2000E-03 )  
 predicted energy change: -2.5527E-04 geom step: 1.3770E-  
 01 full step: 1.3770E-01  
 molecular structure not yet converged...

center of mass moved by:

x: 1.3094E-03 y: -3.9766E-04 z: 8.6490E-05

new geometry:

|      | angstroms     |               |               |
|------|---------------|---------------|---------------|
| atom | x             | y             | z             |
| H1   | -0.5726813221 | 1.5273415377  | -1.8931618699 |
| C1   | -0.3877292369 | 1.9172407008  | -0.9099391904 |
| C2   | 0.0868323850  | 2.9268239424  | 1.6187605825  |
| C3   | 0.1034562262  | 1.0703935793  | 0.0711203042  |
| C4   | -0.6417524127 | 3.2554349013  | -0.6487165941 |
| C5   | -0.4060547481 | 3.7534006939  | 0.6214109841  |
| C6   | 0.3529824582  | 1.5890380486  | 1.3510574069  |
| C7   | 0.4317703649  | -0.3955417113 | -0.1795800607 |
| H3   | -1.0199664301 | 3.8929219966  | -1.4280340873 |
| H4   | -0.6056632177 | 4.7859731586  | 0.8463846212  |
| H6   | 0.2556999921  | 3.3286095367  | 2.5982808615  |
| H7   | 1.5086379438  | -0.4682759844 | -0.3263482400 |
| C10  | -0.2278709659 | -0.9776669354 | -1.4218229960 |
| C8   | 0.0950592511  | -1.2059762465 | 1.0902768807  |
| C16  | 0.4296547579  | -2.6949491268 | 0.9725782660  |
| H12  | -0.9724980129 | -1.0973057476 | 1.2855437076  |
| N2   | 0.8926096338  | 0.7579426353  | 2.3551844043  |
| C9   | 0.7917201930  | -0.6098541397 | 2.3065164785  |
| C17  | 1.5131880732  | 1.3515918122  | 3.5279600896  |
| O1   | 1.2084267792  | -1.3041443126 | 3.1935555354  |
| C11  | -1.4175274396 | -2.1009616596 | -3.6928249934 |
| C12  | 0.5458714913  | -1.4213029579 | -2.4857177450 |
| C13  | -1.6147883302 | -1.0971791512 | -1.5164176278 |
| C14  | -2.2034819731 | -1.6545978239 | -2.6370503111 |
| C15  | -0.0418310656 | -1.9800311941 | -3.6146052271 |
| H19  | 1.6176755938  | -1.3334176291 | -2.4331840317 |
| H20  | -2.2382460261 | -0.7440489158 | -0.7144103176 |
| H21  | -3.2747867212 | -1.7403771932 | -2.6895132100 |
| H22  | 0.5782446520  | -2.3191312492 | -4.4252366082 |
| H23  | -1.8765816043 | -2.5354658104 | -4.5630432881 |
| H24  | 1.4856396907  | -2.8351650387 | 0.7586615796  |
| H25  | -0.1451012315 | -3.1510936573 | 0.1765341785  |
| H11  | 0.2104402576  | -3.2024206528 | 1.9008850173  |
| H2   | 2.1552144309  | 2.1707454357  | 3.2342941050  |
| H5   | 2.0994089356  | 0.5927040067  | 4.0160963549  |
| H8   | 0.7673732619  | 1.7208228849  | 4.2254504811  |

nuclear repulsion energy..... 1393.055123690 hartrees

-----  
/ end of geometry optimization iteration 6 /  
-----

end of program geopt

start of program onee

smallest eigenvalue of S: 3.355E-04

number of canonical orbitals..... 368

end of program onee

start of program probe

end of program probe

start of program grid

number of gridpoints:

| atom     | H1  | C1  | C2  | C3  | C4  | C5  | C6  |
|----------|-----|-----|-----|-----|-----|-----|-----|
| C7       |     |     |     |     |     |     |     |
| grid # 1 | 71  | 88  | 89  | 88  | 89  | 89  | 86  |
| 82       |     |     |     |     |     |     |     |
| grid # 2 | 113 | 96  | 96  | 98  | 97  | 97  | 93  |
| 90       |     |     |     |     |     |     |     |
| grid # 3 | 213 | 184 | 184 | 192 | 184 | 184 | 189 |
| 175      |     |     |     |     |     |     |     |
| grid # 4 | 213 | 327 | 328 | 341 | 327 | 328 | 327 |
| 312      |     |     |     |     |     |     |     |

number of gridpoints:

| atom     | H3  | H4  | H6  | H7  | C10 | C8  | C16 |
|----------|-----|-----|-----|-----|-----|-----|-----|
| H12      |     |     |     |     |     |     |     |
| grid # 1 | 73  | 73  | 70  | 66  | 91  | 82  | 74  |
| 68       |     |     |     |     |     |     |     |
| grid # 2 | 118 | 118 | 112 | 106 | 100 | 90  | 80  |
| 111      |     |     |     |     |     |     |     |
| grid # 3 | 223 | 223 | 207 | 209 | 193 | 173 | 148 |
| 213      |     |     |     |     |     |     |     |
| grid # 4 | 224 | 223 | 205 | 205 | 337 | 312 | 287 |
| 208      |     |     |     |     |     |     |     |

number of gridpoints:

| atom     | N2  | C9 | C17 | O1  | C11 | C12 | C13 |
|----------|-----|----|-----|-----|-----|-----|-----|
| C14      |     |    |     |     |     |     |     |
| grid # 1 | 94  | 81 | 69  | 111 | 89  | 87  | 87  |
| 89       |     |    |     |     |     |     |     |
| grid # 2 | 105 | 92 | 80  | 123 | 97  | 95  | 95  |
| 95       |     |    |     |     |     |     |     |

```

  grid # 3      212    176    144    257    182    183    183
183
  grid # 4      391    293    274    450    326    326    326
326

```

```

  number of gridpoints:
  atom      C15    H19    H20    H21    H22    H23    H24
H25
  grid # 1      89     73     70     73     73     73     71
71
  grid # 2      96    113    113    118    118    118    109
110
  grid # 3      182    213    212    223    223    224    218
215
  grid # 4      326    213    211    223    224    224    218
212

```

```

  number of gridpoints:
  atom      H11    H2     H5     H8    total
  grid # 1      71     71     70     71    2862
  grid # 2     108    111    108    111    3730
  grid # 3     217    215    212    217    7185
  grid # 4     214    213    209    218    9921

```

end of program grid

```

  start of program rwr
recomputing RWR matrix 17   grid: 4
  end of program rwr

```

start of program scf

|      | i | u | d | i | g |                  | RMS     | maximum |
|------|---|---|---|---|---|------------------|---------|---------|
|      | t | p | i | c | r |                  | energy  | DIIS    |
|      | e | d | i | u | i | total energy     | density | error   |
|      | r | t | s | t | d |                  | change  |         |
| etot | 1 | N | N | 2 | U | -783.02884572067 | 1.6E-04 | 4.4E-03 |
| etot | 2 | Y | Y | 6 | M | -783.03370737433 | 4.9E-03 | 1.8E-03 |
| etot | 3 | Y | Y | 6 | M | -783.03431816575 | 6.1E-04 | 4.0E-04 |
| etot | 4 | N | Y | 2 | U | -783.03433585814 | 1.8E-05 | 1.7E-04 |
| etot | 5 | Y | Y | 6 | M | -783.03434373753 | 7.9E-06 | 5.0E-05 |
| etot | 6 | Y | N | 6 | M | -783.03434508372 | 1.3E-06 | 0.0E+00 |

Energy components, in hartrees:

```

(A) Nuclear repulsion..... 1393.05512369041
(E) Total one-electron terms..... -3830.58777047841
(I) Total two-electron terms..... 1654.49830170429
(L) Electronic energy..... -2176.08946877413 (E+I)

```

(N) Total energy..... -783.03434508372 (A+L)

SCFE: SCF energy: HF -783.03434508372 hartrees iterations:  
6

HOMO energy: -0.30011  
LUMO energy: 0.12684

Orbital energies:

|           |           |           |           |           |           |
|-----------|-----------|-----------|-----------|-----------|-----------|
| -20.52660 | -15.60092 | -11.34666 | -11.28514 | -11.25510 | -11.25132 |
| -11.24412 | -11.24354 | -11.24226 | -11.23701 | -11.23672 | -11.23629 |
| -11.23421 | -11.23419 | -11.23391 | -11.23361 | -11.23260 | -11.22762 |
| -11.20767 | -1.39659  | -1.26924  | -1.16870  | -1.14755  | -1.10644  |
| -1.02997  | -1.01965  | -1.01825  | -1.01536  | -0.96019  | -0.93260  |
| -0.85917  | -0.83804  | -0.83173  | -0.82968  | -0.78983  | -0.74334  |
| -0.71209  | -0.69639  | -0.68070  | -0.66473  | -0.64188  | -0.63662  |
| -0.62749  | -0.61841  | -0.61186  | -0.60433  | -0.59983  | -0.58838  |
| -0.57026  | -0.56086  | -0.54933  | -0.53996  | -0.52863  | -0.52093  |
| -0.51455  | -0.50485  | -0.49959  | -0.49676  | -0.48389  | -0.47000  |
| -0.46811  | -0.42047  | -0.41278  | -0.34305  | -0.33561  | -0.32730  |
| -0.30011  | 0.12684   | 0.13635   | 0.14139   | 0.15122   | 0.20356   |
| 0.23580   | 0.24196   | 0.25320   | 0.26161   | 0.27452   |           |

end of program scf

start of program derla  
end of program derla

start of program rwr  
recomputing Rwr matrix 17 grid: 4  
end of program rwr

start of program derlb

forces (hartrees/bohr) : total

| atom | label | x             | y             | z             |
|------|-------|---------------|---------------|---------------|
| 1    | H1    | 2.271081E-04  | 1.216095E-04  | 1.082944E-04  |
| 2    | C1    | 5.186854E-04  | 2.806669E-04  | 1.469776E-03  |
| 3    | C2    | -4.665463E-04 | -5.998461E-04 | -1.766580E-03 |
| 4    | C3    | 9.534496E-04  | 4.456467E-04  | 1.967966E-03  |
| 5    | C4    | 4.935329E-04  | 1.305581E-03  | 3.145803E-03  |
| 6    | C5    | -5.599219E-04 | -8.946850E-04 | -3.210444E-03 |
| 7    | C6    | -1.657815E-03 | -6.058748E-04 | -2.566135E-03 |
| 8    | C7    | -1.163267E-03 | 1.312031E-04  | 1.680837E-04  |
| 9    | H3    | 4.316664E-05  | 1.129883E-04  | 4.280720E-04  |
| 10   | H4    | -1.173277E-04 | 3.166913E-04  | -9.211525E-05 |

|       |       |               |               |               |
|-------|-------|---------------|---------------|---------------|
| 11    | H6    | -1.798394E-04 | 2.532126E-04  | 4.970073E-05  |
| 12    | H7    | 5.832312E-04  | 1.548604E-04  | 2.583969E-04  |
| 13    | C10   | -3.775088E-04 | 2.025095E-05  | -3.476817E-04 |
| 14    | C8    | 2.314555E-04  | -9.789165E-04 | -8.489841E-04 |
| 15    | C16   | 1.453268E-05  | 1.483674E-03  | 2.893736E-04  |
| 16    | H12   | 5.733456E-04  | -7.991196E-05 | 5.433509E-05  |
| 17    | N2    | 1.142071E-03  | -2.562852E-03 | -2.833270E-03 |
| 18    | C9    | -3.073795E-04 | -1.134186E-03 | 1.979257E-03  |
| 19    | C17   | -8.705439E-05 | -6.225941E-04 | 2.277256E-03  |
| 20    | O1    | -4.792424E-04 | 2.644846E-03  | -1.674648E-03 |
| 21    | C11   | 2.120048E-04  | 4.169085E-04  | 9.639898E-04  |
| 22    | C12   | -7.400468E-04 | 2.009130E-04  | 6.220562E-04  |
| 23    | C13   | 6.874647E-04  | -3.551548E-04 | -1.012763E-03 |
| 24    | C14   | 7.270571E-04  | -7.349147E-05 | -2.745324E-04 |
| 25    | C15   | -4.743025E-04 | 5.516508E-04  | 9.612754E-04  |
| 26    | H19   | -4.947400E-05 | -2.425096E-04 | -2.741908E-04 |
| 27    | H20   | -2.278509E-04 | 2.198601E-05  | 3.444204E-04  |
| 28    | H21   | -4.668025E-05 | 3.508883E-05  | -3.332067E-05 |
| 29    | H22   | 1.964218E-04  | -1.206227E-04 | -3.175738E-04 |
| 30    | H23   | -2.521789E-05 | -3.636574E-05 | -1.672455E-04 |
| 31    | H24   | -6.567914E-04 | -5.380175E-05 | 6.579315E-05  |
| 32    | H25   | 1.616368E-04  | 1.794365E-04  | 9.641891E-05  |
| 33    | H11   | 1.582532E-04  | -1.572193E-04 | 1.874749E-04  |
| 34    | H2    | 2.570725E-04  | 4.053167E-04  | -1.199306E-03 |
| 35    | H5    | -1.219002E-04 | 1.821590E-04  | 6.048539E-04  |
| 36    | H8    | 3.284274E-04  | -1.003100E-04 | 3.568440E-04  |
| ----- |       | -----         | -----         | -----         |
|       | total | -2.292502E-04 | 6.463486E-04  | -2.193489E-04 |

end of program der1b

start of program geopt 7

geometry optimization step 7

reading input hessian of dimension 108

in five columns format

reading input hessian of dimension 108

in five columns format

reading input hessian of dimension 108

in five columns format

energy change: -7.9037E-05 . ( 5.0000E-05 )

gradient maximum: 4.6013E-03 . ( 4.5000E-04 )

gradient rms: 8.8095E-04 . ( 3.0000E-04 )

step size: 0.06047 trust radius: 0.30000

displacement maximum: 3.4926E-02 . ( 1.8000E-03 )

displacement rms: 5.4749E-03 . ( 1.2000E-03 )

predicted energy change: -1.1554E-04 geom step: 6.0472E-

02 full step: 6.0472E-02

molecular structure not yet converged...

center of mass moved by:

x: 3.4406E-04 y: -4.5979E-04 z: 3.2713E-04

new geometry:

|      | angstroms     |               |               |
|------|---------------|---------------|---------------|
| atom | x             | y             | z             |
| H1   | -0.5699917377 | 1.5301542015  | -1.8905411925 |
| C1   | -0.3904661091 | 1.9174633877  | -0.9058012081 |
| C2   | 0.0722912184  | 2.9199926793  | 1.6192544872  |
| C3   | 0.1018150237  | 1.0685880080  | 0.0720184482  |
| C4   | -0.6534282111 | 3.2538162091  | -0.6429268828 |
| C5   | -0.4260344983 | 3.7482515384  | 0.6250615819  |
| C6   | 0.3491246356  | 1.5853896009  | 1.3493857014  |
| C7   | 0.4301905337  | -0.3971696002 | -0.1763189920 |
| H3   | -1.0330556950 | 3.8916721814  | -1.4209841494 |
| H4   | -0.6347004231 | 4.7784419952  | 0.8530599405  |
| H6   | 0.2376062138  | 3.3192942317  | 2.5998557534  |
| H7   | 1.5085562443  | -0.4705726901 | -0.3174073551 |
| C10  | -0.2255021351 | -0.9786199821 | -1.4201846265 |
| C8   | 0.0891493383  | -1.2057173752 | 1.0939397723  |
| C16  | 0.4140300438  | -2.6967891183 | 0.9798455136  |
| H12  | -0.9778020152 | -1.0896264356 | 1.2910669329  |
| N2   | 0.9085882864  | 0.7552661779  | 2.3460140307  |
| C9   | 0.7922540602  | -0.6102335659 | 2.3069935904  |
| C17  | 1.5363340714  | 1.3527810435  | 3.5138086691  |
| O1   | 1.2082567921  | -1.3001526255 | 3.1952935765  |
| C11  | -1.4078398149 | -2.0922215504 | -3.6966800535 |
| C12  | 0.5517002469  | -1.4279764966 | -2.4777865557 |
| C13  | -1.6121923432 | -1.0907832806 | -1.5227388085 |
| C14  | -2.1975318691 | -1.6426780030 | -2.6462747177 |
| C15  | -0.0324528324 | -1.9813120801 | -3.6095465179 |
| H19  | 1.6237006138  | -1.3498167715 | -2.4197930486 |
| H20  | -2.2379843655 | -0.7350894280 | -0.7231078319 |
| H21  | -3.2688614471 | -1.7209477216 | -2.7055790072 |
| H22  | 0.5903534551  | -2.3248943979 | -4.4168227515 |
| H23  | -1.8636381710 | -2.5219175566 | -4.5711693736 |
| H24  | 1.4671489178  | -2.8448072509 | 0.7543388598  |
| H25  | -0.1719581135 | -3.1551496701 | 0.1917542186  |
| H11  | 0.2016967811  | -3.1985875984 | 1.9142761709  |
| H2   | 2.1725424562  | 2.1726568093  | 3.2038223330  |
| H5   | 2.1302164122  | 0.5994436776  | 4.0021428942  |
| H8   | 0.7946754746  | 1.7226884890  | 4.2164439812  |

nuclear repulsion energy..... 1393.679119978 hartrees

-----  
/ end of geometry optimization iteration 7 /  
-----

end of program geopt

start of program onee  
 smallest eigenvalue of S: 3.316E-04  
 number of canonical orbitals..... 368  
 end of program onee

start of program probe  
 end of program probe

start of program grid

number of gridpoints:

| atom     | H1  | C1  | C2  | C3  | C4  | C5  | C6  |
|----------|-----|-----|-----|-----|-----|-----|-----|
| C7       |     |     |     |     |     |     |     |
| grid # 1 | 71  | 88  | 89  | 88  | 89  | 87  | 86  |
| 82       |     |     |     |     |     |     |     |
| grid # 2 | 113 | 96  | 96  | 98  | 97  | 97  | 93  |
| 90       |     |     |     |     |     |     |     |
| grid # 3 | 213 | 184 | 184 | 192 | 183 | 183 | 195 |
| 175      |     |     |     |     |     |     |     |
| grid # 4 | 212 | 327 | 328 | 339 | 327 | 328 | 329 |
| 312      |     |     |     |     |     |     |     |

number of gridpoints:

| atom     | H3  | H4  | H6  | H7  | C10 | C8  | C16 |
|----------|-----|-----|-----|-----|-----|-----|-----|
| H12      |     |     |     |     |     |     |     |
| grid # 1 | 73  | 73  | 70  | 66  | 90  | 82  | 73  |
| 68       |     |     |     |     |     |     |     |
| grid # 2 | 118 | 118 | 112 | 106 | 100 | 90  | 80  |
| 110      |     |     |     |     |     |     |     |
| grid # 3 | 223 | 223 | 207 | 209 | 192 | 174 | 146 |
| 213      |     |     |     |     |     |     |     |
| grid # 4 | 224 | 223 | 207 | 206 | 337 | 310 | 285 |
| 208      |     |     |     |     |     |     |     |

number of gridpoints:

| atom     | N2  | C9  | C17 | O1  | C11 | C12 | C13 |
|----------|-----|-----|-----|-----|-----|-----|-----|
| C14      |     |     |     |     |     |     |     |
| grid # 1 | 94  | 81  | 71  | 111 | 89  | 87  | 87  |
| 89       |     |     |     |     |     |     |     |
| grid # 2 | 105 | 92  | 79  | 123 | 97  | 95  | 95  |
| 95       |     |     |     |     |     |     |     |
| grid # 3 | 211 | 176 | 142 | 257 | 182 | 182 | 183 |
| 183      |     |     |     |     |     |     |     |
| grid # 4 | 391 | 292 | 273 | 450 | 326 | 326 | 326 |
| 326      |     |     |     |     |     |     |     |

number of gridpoints:

| atom | C15 | H19 | H20 | H21 | H22 | H23 | H24 |
|------|-----|-----|-----|-----|-----|-----|-----|
| H25  |     |     |     |     |     |     |     |



```

  grid # 1      89      73      70      73      73      73      71
71
  grid # 2      96     113     113     118     118     118     109
110
  grid # 3     182     213     212     223     223     224     218
215
  grid # 4     326     213     211     223     224     224     218
214

```

number of gridpoints:

| atom     | H11 | H2  | H5  | H8  | total |
|----------|-----|-----|-----|-----|-------|
| grid # 1 | 71  | 71  | 70  | 71  | 2860  |
| grid # 2 | 108 | 111 | 108 | 111 | 3728  |
| grid # 3 | 217 | 215 | 212 | 217 | 7183  |
| grid # 4 | 214 | 212 | 209 | 218 | 9918  |

end of program grid

start of program rwr

end of program rwr

start of program scf

|      | i | u | d | i | g |                  | RMS     | maximum |
|------|---|---|---|---|---|------------------|---------|---------|
|      | t | p | i | c | r |                  | density | DIIS    |
|      | e | d | i | u | i | energy           | change  | error   |
|      | r | t | s | t | d | total energy     | change  | error   |
| etot | 1 | N | N | 1 | U | -783.03374900811 | 7.7E-05 | 1.3E-03 |
| etot | 2 | Y | Y | 4 | M | -783.03425399363 | 5.0E-04 | 5.2E-04 |
| etot | 3 | Y | Y | 4 | M | -783.03431710245 | 6.3E-05 | 1.3E-04 |
| etot | 4 | Y | Y | 4 | M | -783.03432047845 | 3.4E-06 | 5.6E-05 |
| etot | 5 | Y | N | 4 | M | -783.03432189558 | 1.4E-06 | 0.0E+00 |

Energy components, in hartrees:

|     |                               |                   |       |
|-----|-------------------------------|-------------------|-------|
| (A) | Nuclear repulsion.....        | 1393.67911997751  |       |
| (E) | Total one-electron terms..... | -3831.84105412155 |       |
| (I) | Total two-electron terms..... | 1655.12761224846  |       |
| (L) | Electronic energy.....        | -2176.71344187310 | (E+I) |
| (N) | Total energy.....             | -783.03432189558  | (A+L) |

SCFE: SCF energy: HF -783.03432189558 hartrees iterations:  
5

HOMO energy: -0.30109  
LUMO energy: 0.12735

Orbital energies:

|           |           |           |           |           |           |
|-----------|-----------|-----------|-----------|-----------|-----------|
| -20.52621 | -15.60029 | -11.34593 | -11.28451 | -11.25545 | -11.25120 |
| -11.24371 | -11.24351 | -11.24183 | -11.23658 | -11.23640 | -11.23591 |
| -11.23388 | -11.23387 | -11.23354 | -11.23328 | -11.23246 | -11.22724 |
| -11.20812 | -1.39749  | -1.26893  | -1.16906  | -1.14828  | -1.10662  |
| -1.03005  | -1.02020  | -1.01868  | -1.01515  | -0.96000  | -0.93259  |
| -0.85892  | -0.83792  | -0.83174  | -0.82996  | -0.78990  | -0.74326  |
| -0.71199  | -0.69632  | -0.68102  | -0.66496  | -0.64183  | -0.63631  |
| -0.62783  | -0.61837  | -0.61221  | -0.60428  | -0.59881  | -0.58849  |
| -0.57028  | -0.56075  | -0.54938  | -0.54015  | -0.52869  | -0.52085  |
| -0.51436  | -0.50494  | -0.49989  | -0.49661  | -0.48376  | -0.47034  |
| -0.46809  | -0.42019  | -0.41263  | -0.34306  | -0.33571  | -0.32707  |
| -0.30109  | 0.12735   | 0.13675   | 0.14170   | 0.15157   | 0.20407   |
| 0.23568   | 0.24202   | 0.25327   | 0.26126   | 0.27470   |           |

end of program scf

start of program derla  
end of program derla

start of program rwr  
recomputing Rwr matrix 17 grid: 4  
end of program rwr

start of program der1b

forces (hartrees/bohr) : total

| atom | label | x             | y             | z             |
|------|-------|---------------|---------------|---------------|
| 1    | H1    | -8.756323E-07 | -5.549027E-05 | -3.027852E-04 |
| 2    | C1    | 3.460237E-05  | -3.815773E-04 | 4.978475E-06  |
| 3    | C2    | -2.730008E-04 | -7.685054E-05 | -5.589996E-04 |
| 4    | C3    | 2.889074E-04  | 4.057053E-06  | 1.782790E-04  |
| 5    | C4    | -3.778517E-05 | -2.701043E-05 | -2.247732E-05 |
| 6    | C5    | 2.333149E-04  | -2.097944E-04 | 5.299008E-04  |
| 7    | C6    | 2.513904E-04  | 1.629590E-04  | 8.878774E-06  |
| 8    | C7    | -4.181213E-04 | -1.309624E-04 | -9.886016E-05 |
| 9    | H3    | -8.508096E-06 | -1.192945E-04 | 4.262361E-05  |
| 10   | H4    | 6.281730E-05  | 2.009668E-04  | 1.699253E-04  |
| 11   | H6    | 4.346850E-05  | 4.586833E-04  | 5.003538E-04  |
| 12   | H7    | 1.264357E-05  | 1.216860E-04  | 8.291130E-05  |
| 13   | C10   | -2.591912E-04 | 1.126998E-04  | 2.923811E-04  |
| 14   | C8    | -4.297350E-04 | -5.688182E-04 | -3.393951E-04 |
| 15   | C16   | -8.309263E-05 | 5.594376E-04  | 1.818946E-04  |
| 16   | H12   | 8.389005E-04  | -1.880512E-04 | -1.233930E-04 |
| 17   | N2    | -9.111789E-04 | -5.544360E-04 | -2.683171E-03 |
| 18   | C9    | -3.770045E-04 | -6.003563E-05 | -5.139534E-05 |
| 19   | C17   | 2.303698E-04  | 4.991149E-04  | 1.053068E-03  |
| 20   | O1    | 3.328331E-04  | -4.186373E-05 | 6.468095E-04  |

|       |       |               |               |               |
|-------|-------|---------------|---------------|---------------|
| 21    | C11   | -1.421224E-05 | -7.206171E-05 | -1.681081E-04 |
| 22    | C12   | 6.846973E-05  | 2.643001E-04  | 5.150298E-04  |
| 23    | C13   | 6.058929E-04  | 3.071575E-04  | 4.294553E-04  |
| 24    | C14   | 6.931099E-05  | -2.456700E-04 | -5.552205E-04 |
| 25    | C15   | -3.142517E-04 | -1.306566E-04 | -3.112255E-04 |
| 26    | H19   | 1.228372E-04  | 3.240965E-05  | -4.198892E-05 |
| 27    | H20   | -5.996181E-05 | -3.347475E-06 | 1.025972E-04  |
| 28    | H21   | -1.604856E-04 | -4.716251E-05 | -3.304380E-05 |
| 29    | H22   | -1.360587E-05 | 1.056759E-05  | -5.820001E-05 |
| 30    | H23   | -2.923334E-05 | -3.476214E-05 | -4.039000E-05 |
| 31    | H24   | -1.022132E-03 | 4.082317E-05  | 2.813084E-04  |
| 32    | H25   | 5.203043E-04  | 6.255197E-04  | 6.463181E-04  |
| 33    | H11   | 3.534913E-04  | 2.579826E-04  | -6.379859E-04 |
| 34    | H2    | -3.870477E-04 | -1.930727E-04 | 1.454670E-04  |
| 35    | H5    | -2.683275E-04 | 1.447454E-04  | 2.148347E-05  |
| 36    | H8    | 8.164214E-04  | -8.398156E-05 | -1.348185E-05 |
| ----- |       | -----         | -----         | -----         |
|       | total | -1.817755E-04 | 5.782108E-04  | -2.064574E-04 |

end of program derlb

start of program geopt 8

geometry optimization step 8

reading input hessian of dimension 108

in five columns format

reading input hessian of dimension 108

in five columns format

energy change: 2.3188E-05 \* ( 5.0000E-05 )  
 gradient maximum: 1.4547E-03 . ( 4.5000E-04 )  
 gradient rms: 4.1313E-04 . ( 3.0000E-04 )  
 step size: 0.14222 trust radius: 0.30000  
 displacement maximum: 7.7289E-02 . ( 1.8000E-03 )  
 displacement rms: 1.2876E-02 . ( 1.2000E-03 )  
 predicted energy change: -7.6457E-05 geom step: 1.4222E-  
 01 full step: 1.4222E-01  
 molecular structure not yet converged...

center of mass moved by:

x: -1.1837E-02 y: 1.5469E-03 z: 1.7140E-03

new geometry:

|      | angstroms     |              |               |
|------|---------------|--------------|---------------|
| atom | x             | y            | z             |
| H1   | -0.5864987654 | 1.5324898101 | -1.8892765297 |
| C1   | -0.3956998422 | 1.9195562430 | -0.9056281219 |
| C2   | 0.0957942140  | 2.9237885776 | 1.6136613176  |
| C3   | 0.1025973714  | 1.0702500403 | 0.0678206425  |
| C4   | -0.6504765272 | 3.2573494231 | -0.6407979608 |

|     |               |               |               |
|-----|---------------|---------------|---------------|
| C5  | -0.4069361401 | 3.7535624101  | 0.6236165469  |
| C6  | 0.3620731334  | 1.5879999742  | 1.3414037802  |
| C7  | 0.4274283216  | -0.3960101603 | -0.1776989750 |
| H3  | -1.0367199390 | 3.8947947483  | -1.4156452034 |
| H4  | -0.6057910084 | 4.7854300530  | 0.8534501851  |
| H6  | 0.2740789874  | 3.3250590621  | 2.5928754071  |
| H7  | 1.5060525124  | -0.4675239688 | -0.3171219588 |
| C10 | -0.2266746243 | -0.9787766880 | -1.4216675261 |
| C8  | 0.0896716612  | -1.2085060093 | 1.0905559375  |
| C16 | 0.4473539462  | -2.6860738676 | 0.9832255305  |
| H12 | -0.9760544377 | -1.1152952934 | 1.2744031729  |
| N2  | 0.9259650237  | 0.7537619706  | 2.3277745596  |
| C9  | 0.7621697719  | -0.6092625771 | 2.3155703929  |
| C17 | 1.5470848239  | 1.3389197170  | 3.5093837004  |
| O1  | 1.1222606524  | -1.2963838725 | 3.2329542278  |
| C11 | -1.4031923589 | -2.0976607713 | -3.6992472965 |
| C12 | 0.5525077750  | -1.4265411131 | -2.4786716594 |
| C13 | -1.6125455336 | -1.0949136988 | -1.5258181170 |
| C14 | -2.1950077187 | -1.6496893230 | -2.6496126004 |
| C15 | -0.0286756405 | -1.9818689463 | -3.6108369694 |
| H19 | 1.6240440490  | -1.3454729980 | -2.4209657149 |
| H20 | -2.2405092741 | -0.7412966926 | -0.7271393056 |
| H21 | -3.2658783776 | -1.7317552747 | -2.7097592412 |
| H22 | 0.5957648198  | -2.3235540528 | -4.4174109945 |
| H23 | -1.8568860631 | -2.5296352110 | -4.5735918276 |
| H24 | 1.5010050846  | -2.8119731186 | 0.7814416001  |
| H25 | -0.1078593304 | -3.1477020220 | 0.1847805523  |
| H11 | 0.2333637741  | -3.1974560065 | 1.9072578535  |
| H2  | 2.1928150888  | 2.1540692087  | 3.2018155473  |
| H5  | 2.1294412902  | 0.5774573997  | 4.0017525878  |
| H8  | 0.8062274999  | 1.7142304430  | 4.2092071965  |

nuclear repulsion energy..... 1393.881595876 hartrees

-----  
 / end of geometry optimization iteration 8 /  
 -----

end of program geopt

start of program onee  
 smallest eigenvalue of S: 3.309E-04  
 number of canonical orbitals..... 368  
 end of program onee

start of program probe  
 end of program probe

start of program grid

| number of gridpoints: |      |     |     |     |     |     |     |     |
|-----------------------|------|-----|-----|-----|-----|-----|-----|-----|
|                       | atom | H1  | C1  | C2  | C3  | C4  | C5  | C6  |
| C7                    |      |     |     |     |     |     |     |     |
| grid # 1              |      | 71  | 88  | 89  | 88  | 89  | 87  | 86  |
| 82                    |      |     |     |     |     |     |     |     |
| grid # 2              |      | 113 | 96  | 96  | 98  | 97  | 97  | 93  |
| 90                    |      |     |     |     |     |     |     |     |
| grid # 3              |      | 213 | 184 | 183 | 192 | 183 | 183 | 191 |
| 175                   |      |     |     |     |     |     |     |     |
| grid # 4              |      | 212 | 327 | 328 | 339 | 327 | 328 | 326 |
| 311                   |      |     |     |     |     |     |     |     |

| number of gridpoints: |      |     |     |     |     |     |     |     |
|-----------------------|------|-----|-----|-----|-----|-----|-----|-----|
|                       | atom | H3  | H4  | H6  | H7  | C10 | C8  | C16 |
| H12                   |      |     |     |     |     |     |     |     |
| grid # 1              |      | 73  | 73  | 70  | 68  | 90  | 82  | 71  |
| 68                    |      |     |     |     |     |     |     |     |
| grid # 2              |      | 118 | 118 | 112 | 106 | 100 | 91  | 79  |
| 110                   |      |     |     |     |     |     |     |     |
| grid # 3              |      | 223 | 223 | 207 | 209 | 192 | 176 | 153 |
| 213                   |      |     |     |     |     |     |     |     |
| grid # 4              |      | 224 | 223 | 207 | 206 | 337 | 309 | 289 |
| 204                   |      |     |     |     |     |     |     |     |

| number of gridpoints: |      |     |     |     |     |     |     |     |
|-----------------------|------|-----|-----|-----|-----|-----|-----|-----|
|                       | atom | N2  | C9  | C17 | O1  | C11 | C12 | C13 |
| C14                   |      |     |     |     |     |     |     |     |
| grid # 1              |      | 95  | 81  | 70  | 111 | 89  | 87  | 87  |
| 89                    |      |     |     |     |     |     |     |     |
| grid # 2              |      | 105 | 93  | 79  | 123 | 97  | 95  | 95  |
| 95                    |      |     |     |     |     |     |     |     |
| grid # 3              |      | 214 | 176 | 143 | 257 | 181 | 182 | 183 |
| 183                   |      |     |     |     |     |     |     |     |
| grid # 4              |      | 393 | 292 | 272 | 450 | 326 | 326 | 326 |
| 326                   |      |     |     |     |     |     |     |     |

| number of gridpoints: |      |     |     |     |     |     |     |     |
|-----------------------|------|-----|-----|-----|-----|-----|-----|-----|
|                       | atom | C15 | H19 | H20 | H21 | H22 | H23 | H24 |
| H25                   |      |     |     |     |     |     |     |     |
| grid # 1              |      | 89  | 73  | 71  | 73  | 73  | 73  | 71  |
| 70                    |      |     |     |     |     |     |     |     |
| grid # 2              |      | 96  | 113 | 113 | 118 | 118 | 118 | 109 |
| 108                   |      |     |     |     |     |     |     |     |
| grid # 3              |      | 182 | 213 | 212 | 223 | 223 | 224 | 217 |
| 214                   |      |     |     |     |     |     |     |     |
| grid # 4              |      | 326 | 212 | 211 | 223 | 224 | 224 | 216 |
| 211                   |      |     |     |     |     |     |     |     |

| number of gridpoints: |      |     |     |     |     |       |
|-----------------------|------|-----|-----|-----|-----|-------|
|                       | atom | H11 | H2  | H5  | H8  | total |
| grid # 1              |      | 70  | 71  | 70  | 71  | 2859  |
| grid # 2              |      | 108 | 111 | 107 | 110 | 3725  |

```

grid # 3      217    215    213    217    7189
grid # 4      214    214    209    218    9910

```

end of program grid

```

start of program rwr
end of program rwr

```

start of program scf

|      | i | u | d | i | g |                  | RMS     | maximum |
|------|---|---|---|---|---|------------------|---------|---------|
|      | t | p | i | c | r |                  | energy  | DIIS    |
|      | e | d | i | u | i | total energy     | density | error   |
|      | r | t | s | t | d |                  | change  |         |
| etot | 1 | N | N | 2 | U | -783.03069846597 | 2.3E-04 | 4.4E-03 |
| etot | 2 | Y | Y | 6 | M | -783.03389217665 | 3.2E-03 | 1.8E-03 |
| etot | 3 | Y | Y | 6 | M | -783.03425958179 | 3.7E-04 | 4.0E-04 |
| etot | 4 | N | Y | 2 | U | -783.03427925014 | 2.0E-05 | 2.2E-04 |
| etot | 5 | Y | Y | 6 | M | -783.03428689346 | 7.6E-06 | 7.5E-05 |
| etot | 6 | Y | N | 6 | M | -783.03428901507 | 2.1E-06 | 0.0E+00 |

Energy components, in hartrees:

```

(A) Nuclear repulsion..... 1393.88159587636
(E) Total one-electron terms..... -3832.22643817311
(I) Total two-electron terms..... 1655.31055328169
(L) Electronic energy..... -2176.91588489143 (E+I)
(N) Total energy..... -783.03428901507 (A+L)

```

```

SCFE: SCF energy: HF      -783.03428901507 hartrees  iterations:
6

```

```

HOMO energy:      -0.30108
LUMO energy:       0.12752

```

Orbital energies:

|           |           |           |           |           |           |
|-----------|-----------|-----------|-----------|-----------|-----------|
| -20.52677 | -15.60066 | -11.34631 | -11.28442 | -11.25577 | -11.25099 |
| -11.24383 | -11.24213 | -11.24154 | -11.23652 | -11.23650 | -11.23592 |
| -11.23394 | -11.23392 | -11.23364 | -11.23340 | -11.23255 | -11.22712 |
| -11.20563 | -1.39651  | -1.26916  | -1.16920  | -1.14836  | -1.10742  |
| -1.03151  | -1.02039  | -1.01885  | -1.01522  | -0.95951  | -0.93346  |
| -0.86016  | -0.83822  | -0.83193  | -0.83019  | -0.79011  | -0.74376  |
| -0.71253  | -0.69669  | -0.68088  | -0.66525  | -0.64201  | -0.63592  |
| -0.62802  | -0.61897  | -0.61271  | -0.60469  | -0.59732  | -0.58855  |
| -0.57055  | -0.56095  | -0.55007  | -0.54078  | -0.52892  | -0.52079  |
| -0.51477  | -0.50572  | -0.50015  | -0.49663  | -0.48353  | -0.47109  |
| -0.46850  | -0.42067  | -0.41301  | -0.34313  | -0.33572  | -0.32751  |
| -0.30108  | 0.12752   | 0.13681   | 0.14163   | 0.15178   | 0.20285   |

0.23559 0.24212 0.25353 0.26162 0.27507

end of program scf

start of program der1a  
end of program der1a

start of program rwr  
recomputing RwR matrix 17 grid: 4  
end of program rwr

start of program der1b

forces (hartrees/bohr) : total

| atom | label | x             | y             | z             |
|------|-------|---------------|---------------|---------------|
| 1    | H1    | 6.330900E-05  | 1.599930E-04  | 2.515359E-04  |
| 2    | C1    | -3.820982E-04 | -4.285491E-04 | -8.349071E-04 |
| 3    | C2    | 1.602821E-04  | 4.899909E-04  | 7.304304E-04  |
| 4    | C3    | -3.587286E-04 | -3.341458E-05 | 2.212094E-04  |
| 5    | C4    | -1.102049E-04 | 1.653245E-04  | -1.997025E-04 |
| 6    | C5    | 3.161384E-05  | -2.058403E-04 | 2.464008E-04  |
| 7    | C6    | 6.445727E-04  | 4.737891E-04  | -7.510266E-04 |
| 8    | C7    | 5.880822E-04  | -1.997425E-04 | -2.750985E-04 |
| 9    | H3    | 3.917162E-05  | 8.936848E-05  | -9.213597E-05 |
| 10   | H4    | -1.090950E-04 | 1.209701E-04  | -1.142084E-04 |
| 11   | H6    | -9.445179E-05 | -1.923460E-04 | -4.825334E-04 |
| 12   | H7    | 1.231873E-04  | -4.133004E-06 | -1.204272E-04 |
| 13   | C10   | 2.001550E-04  | 6.262828E-06  | 1.235108E-04  |
| 14   | C8    | 1.388942E-03  | 1.619742E-03  | -1.060896E-04 |
| 15   | C16   | -6.879629E-04 | 3.757640E-04  | 6.441790E-04  |
| 16   | H12   | -3.141873E-03 | 7.106869E-05  | 5.415809E-04  |
| 17   | N2    | 5.052635E-04  | -3.958456E-03 | 4.994791E-03  |
| 18   | C9    | 8.846687E-04  | 2.243870E-04  | 1.490423E-03  |
| 19   | C17   | 1.134149E-03  | 1.583455E-03  | -1.534303E-03 |
| 20   | O1    | -4.518351E-04 | 3.329679E-03  | -2.459230E-03 |
| 21   | C11   | -4.672105E-04 | 7.815982E-05  | 1.268888E-04  |
| 22   | C12   | 3.969949E-05  | 2.935703E-04  | 3.232656E-04  |
| 23   | C13   | 3.717642E-04  | 1.275869E-04  | 4.275834E-04  |
| 24   | C14   | 1.326799E-04  | -3.021929E-04 | -7.038506E-04 |
| 25   | C15   | -1.015598E-04 | -1.449456E-04 | -2.459885E-04 |
| 26   | H19   | 3.216642E-04  | 8.663778E-05  | 1.294132E-04  |
| 27   | H20   | -1.293120E-04 | 8.581572E-05  | 1.848546E-04  |
| 28   | H21   | -2.716379E-04 | -1.616202E-05 | -1.584307E-05 |
| 29   | H22   | 1.299565E-04  | -4.475512E-05 | -1.362686E-04 |
| 30   | H23   | -7.439133E-05 | -4.153185E-05 | -1.040075E-04 |
| 31   | H24   | 4.100479E-03  | -1.341698E-04 | -1.170002E-03 |
| 32   | H25   | -2.250899E-03 | -2.461442E-03 | -2.986923E-03 |

|       |       |               |               |               |
|-------|-------|---------------|---------------|---------------|
| 33    | H11   | -1.308167E-03 | -5.745324E-04 | 1.900844E-03  |
| 34    | H2    | -6.615611E-04 | -8.134757E-04 | 1.238995E-03  |
| 35    | H5    | -6.004191E-04 | 8.378899E-04  | -9.494906E-04 |
| 36    | H8    | 9.883114E-05  | -6.928102E-05 | -2.187820E-04 |
| ----- |       | -----         | -----         | -----         |
|       | total | -2.429366E-04 | 5.944840E-04  | 7.508651E-05  |

end of program derlb

start of program geopt 9

geometry optimization step 9

reading input hessian of dimension 108

in five columns format

reading input hessian of dimension 108

in five columns format

reading input hessian of dimension 108

in five columns format

\*\* restarting optimization from step 8 \*\*

energy change: 3.2881E-05 \* ( 5.0000E-05 )

gradient maximum: 1.4547E-03 . ( 4.5000E-04 )

gradient rms: 4.1313E-04 . ( 3.0000E-04 )

step size: 0.06128 trust radius: 0.30000

displacement maximum: 2.6088E-02 . ( 1.8000E-03 )

displacement rms: 5.5477E-03 . ( 1.2000E-03 )

predicted energy change: -4.8038E-05 geom step: 6.1277E-

02 full step: 6.1277E-02

molecular structure not yet converged...

center of mass moved by:

x: 2.7756E-17 y: -1.2490E-16 z: -2.2204E-16

new geometry:

|      | angstroms     |               |               |
|------|---------------|---------------|---------------|
| atom | x             | y             | z             |
| H1   | -0.6028821114 | 1.5255573902  | -1.8836524125 |
| C1   | -0.4096792489 | 1.9141786601  | -0.9006449053 |
| C2   | 0.0878492783  | 2.9236296067  | 1.6172113089  |
| C3   | 0.0927510258  | 1.0681321060  | 0.0737421926  |
| C4   | -0.6642570925 | 3.2520488836  | -0.6367052685 |
| C5   | -0.4176006880 | 3.7506626636  | 0.6266617261  |
| C6   | 0.3544512795  | 1.5880350880  | 1.3466103113  |
| C7   | 0.4170777837  | -0.3985715830 | -0.1699592855 |
| H3   | -1.0525605122 | 3.8885742810  | -1.4118210930 |
| H4   | -0.6167322086 | 4.7833170549  | 0.8545293591  |
| H6   | 0.2674814541  | 3.3270622399  | 2.5955278254  |
| H7   | 1.4973945803  | -0.4731027075 | -0.3024150114 |
| C10  | -0.2287965646 | -0.9806639283 | -1.4178880613 |
| C8   | 0.0698890241  | -1.2028043787 | 1.1012482231  |



|     |               |               |               |
|-----|---------------|---------------|---------------|
| C16 | 0.3878450683  | -2.6927505821 | 0.9926362549  |
| H12 | -0.9951779944 | -1.0820840286 | 1.2983596370  |
| N2  | 0.9170358115  | 0.7553208143  | 2.3370671452  |
| C9  | 0.7768072859  | -0.6080366017 | 2.3120223174  |
| C17 | 1.5610950577  | 1.3485102001  | 3.5009099154  |
| O1  | 1.1832216246  | -1.2932589235 | 3.2054919248  |
| C11 | -1.3897408665 | -2.0946804498 | -3.7076261186 |
| C12 | 0.5573168988  | -1.4058899863 | -2.4785095426 |
| C13 | -1.6134753191 | -1.1154172400 | -1.5247167612 |
| C14 | -2.1880030799 | -1.6684722289 | -2.6547607738 |
| C15 | -0.0160431399 | -1.9591481309 | -3.6166482122 |
| H19 | 1.6281608801  | -1.3085902778 | -2.4194149758 |
| H20 | -2.2471717937 | -0.7784529708 | -0.7228773625 |
| H21 | -3.2581532808 | -1.7658803019 | -2.7164491956 |
| H22 | 0.6138580213  | -2.2836317578 | -4.4266535536 |
| H23 | -1.8366797945 | -2.5253223675 | -4.5869058888 |
| H24 | 1.4388793077  | -2.8469283504 | 0.7688543441  |
| H25 | -0.1976502735 | -3.1491850817 | 0.2053308323  |
| H11 | 0.1740858417  | -3.1922226846 | 1.9269623073  |
| H2  | 2.1959879407  | 2.1661330306  | 3.1833633143  |
| H5  | 2.1568809098  | 0.5930508704  | 3.9824096527  |
| H8  | 0.8333257979  | 1.7217187718  | 4.2134231671  |

nuclear repulsion energy..... 1393.834798082 hartrees

-----  
 / end of geometry optimization iteration 9 /  
 -----

end of program geopt

start of program onee  
 smallest eigenvalue of S: 3.318E-04  
 number of canonical orbitals..... 368  
 end of program onee

start of program probe  
 end of program probe

start of program grid

number of gridpoints:

| atom     | H1  | C1  | C2  | C3  | C4  | C5  | C6  |
|----------|-----|-----|-----|-----|-----|-----|-----|
| C7       |     |     |     |     |     |     |     |
| grid # 1 | 71  | 88  | 89  | 88  | 89  | 87  | 86  |
| 82       |     |     |     |     |     |     |     |
| grid # 2 | 113 | 96  | 96  | 98  | 97  | 97  | 93  |
| 91       |     |     |     |     |     |     |     |
| grid # 3 | 213 | 184 | 183 | 192 | 183 | 183 | 193 |
| 175      |     |     |     |     |     |     |     |

|          |     |     |     |     |     |     |     |
|----------|-----|-----|-----|-----|-----|-----|-----|
| grid # 4 | 213 | 327 | 328 | 338 | 327 | 328 | 327 |
|----------|-----|-----|-----|-----|-----|-----|-----|

311

number of gridpoints:

|      |    |    |    |    |     |    |     |
|------|----|----|----|----|-----|----|-----|
| atom | H3 | H4 | H6 | H7 | C10 | C8 | C16 |
|------|----|----|----|----|-----|----|-----|

H12

|          |    |    |    |    |    |    |    |
|----------|----|----|----|----|----|----|----|
| grid # 1 | 73 | 73 | 70 | 67 | 90 | 82 | 74 |
|----------|----|----|----|----|----|----|----|

68

|          |     |     |     |     |     |    |    |
|----------|-----|-----|-----|-----|-----|----|----|
| grid # 2 | 118 | 118 | 112 | 105 | 100 | 91 | 80 |
|----------|-----|-----|-----|-----|-----|----|----|

111

|          |     |     |     |     |     |     |     |
|----------|-----|-----|-----|-----|-----|-----|-----|
| grid # 3 | 223 | 223 | 207 | 209 | 192 | 176 | 147 |
|----------|-----|-----|-----|-----|-----|-----|-----|

213

|          |     |     |     |     |     |     |     |
|----------|-----|-----|-----|-----|-----|-----|-----|
| grid # 4 | 224 | 223 | 208 | 206 | 339 | 309 | 287 |
|----------|-----|-----|-----|-----|-----|-----|-----|

208

number of gridpoints:

|      |    |    |     |    |     |     |     |
|------|----|----|-----|----|-----|-----|-----|
| atom | N2 | C9 | C17 | O1 | C11 | C12 | C13 |
|------|----|----|-----|----|-----|-----|-----|

C14

|          |    |    |    |     |    |    |    |
|----------|----|----|----|-----|----|----|----|
| grid # 1 | 94 | 81 | 72 | 111 | 89 | 87 | 87 |
|----------|----|----|----|-----|----|----|----|

89

|          |     |    |    |     |    |    |    |
|----------|-----|----|----|-----|----|----|----|
| grid # 2 | 104 | 92 | 79 | 123 | 97 | 95 | 95 |
|----------|-----|----|----|-----|----|----|----|

95

|          |     |     |     |     |     |     |     |
|----------|-----|-----|-----|-----|-----|-----|-----|
| grid # 3 | 213 | 176 | 142 | 257 | 182 | 182 | 183 |
|----------|-----|-----|-----|-----|-----|-----|-----|

183

|          |     |     |     |     |     |     |     |
|----------|-----|-----|-----|-----|-----|-----|-----|
| grid # 4 | 390 | 291 | 272 | 450 | 326 | 326 | 326 |
|----------|-----|-----|-----|-----|-----|-----|-----|

326

number of gridpoints:

|      |     |     |     |     |     |     |     |
|------|-----|-----|-----|-----|-----|-----|-----|
| atom | C15 | H19 | H20 | H21 | H22 | H23 | H24 |
|------|-----|-----|-----|-----|-----|-----|-----|

H25

|          |    |    |    |    |    |    |    |
|----------|----|----|----|----|----|----|----|
| grid # 1 | 89 | 73 | 70 | 73 | 73 | 73 | 71 |
|----------|----|----|----|----|----|----|----|

71

|          |    |     |     |     |     |     |     |
|----------|----|-----|-----|-----|-----|-----|-----|
| grid # 2 | 97 | 113 | 113 | 118 | 118 | 118 | 109 |
|----------|----|-----|-----|-----|-----|-----|-----|

110

|          |     |     |     |     |     |     |     |
|----------|-----|-----|-----|-----|-----|-----|-----|
| grid # 3 | 182 | 213 | 212 | 223 | 223 | 224 | 218 |
|----------|-----|-----|-----|-----|-----|-----|-----|

215

|          |     |     |     |     |     |     |     |
|----------|-----|-----|-----|-----|-----|-----|-----|
| grid # 4 | 326 | 213 | 210 | 223 | 224 | 224 | 219 |
|----------|-----|-----|-----|-----|-----|-----|-----|

213

number of gridpoints:

|          |     |     |     |     |       |
|----------|-----|-----|-----|-----|-------|
| atom     | H11 | H2  | H5  | H8  | total |
| grid # 1 | 70  | 71  | 70  | 71  | 2862  |
| grid # 2 | 108 | 111 | 107 | 111 | 3729  |
| grid # 3 | 218 | 215 | 213 | 217 | 7187  |
| grid # 4 | 214 | 212 | 209 | 217 | 9914  |

end of program grid

start of program rwr

end of program rwr

start of program scf

|      | i | u | d | i | g |                  | RMS      | maximum |
|------|---|---|---|---|---|------------------|----------|---------|
|      | t | p | i | c | r |                  | energy   | DIIS    |
|      | e | d | i | u | i | total energy     | density  | error   |
|      | r | t | s | t | d |                  | change   |         |
| etot | 1 | N | N | 1 | U | -783.03124326647 | 2.4E-04  | 3.6E-03 |
| etot | 2 | Y | Y | 4 | M | -783.03397401455 | 2.7E-03  | 1.4E-03 |
| etot | 3 | Y | Y | 4 | M | -783.03429532404 | 3.2E-04  | 3.4E-04 |
| etot | 4 | N | Y | 1 | U | -783.03431616083 | 2.1E-05  | 1.7E-04 |
| etot | 5 | Y | Y | 4 | M | -783.03432088914 | 4.7E-06  | 6.6E-05 |
| etot | 6 | Y | N | 4 | M | -783.03432006507 | -8.2E-07 | 0.0E+00 |

Energy components, in hartrees:

|     |                               |                   |       |
|-----|-------------------------------|-------------------|-------|
| (A) | Nuclear repulsion.....        | 1393.83479808193  |       |
| (E) | Total one-electron terms..... | -3832.15009804478 |       |
| (I) | Total two-electron terms..... | 1655.28097989779  |       |
| (L) | Electronic energy.....        | -2176.86911814699 | (E+I) |
| (N) | Total energy.....             | -783.03432006507  | (A+L) |

SCFE: SCF energy: HF -783.03432006507 hartrees iterations:  
6

HOMO energy: -0.30084  
LUMO energy: 0.12741

Orbital energies:

|           |           |           |           |           |           |
|-----------|-----------|-----------|-----------|-----------|-----------|
| -20.52620 | -15.59981 | -11.34556 | -11.28396 | -11.25517 | -11.25116 |
| -11.24395 | -11.24304 | -11.24149 | -11.23660 | -11.23646 | -11.23611 |
| -11.23404 | -11.23384 | -11.23383 | -11.23354 | -11.23238 | -11.22719 |
| -11.20740 | -1.39895  | -1.26899  | -1.16894  | -1.14816  | -1.10688  |
| -1.03058  | -1.02018  | -1.01838  | -1.01508  | -0.95990  | -0.93288  |
| -0.85912  | -0.83796  | -0.83170  | -0.82989  | -0.78964  | -0.74345  |
| -0.71209  | -0.69629  | -0.68088  | -0.66514  | -0.64197  | -0.63615  |
| -0.62751  | -0.61860  | -0.61259  | -0.60451  | -0.59818  | -0.58820  |
| -0.57058  | -0.56067  | -0.54980  | -0.54047  | -0.52885  | -0.52100  |
| -0.51450  | -0.50485  | -0.49988  | -0.49678  | -0.48375  | -0.47054  |
| -0.46822  | -0.42024  | -0.41266  | -0.34284  | -0.33565  | -0.32745  |
| -0.30084  | 0.12741   | 0.13710   | 0.14173   | 0.15153   | 0.20432   |
| 0.23548   | 0.24203   | 0.25336   | 0.26137   | 0.27468   |           |

end of program scf

start of program derla  
end of program derla

start of program rwr  
end of program rwr

start of program der1b

forces (hartrees/bohr) : total

| atom  | label | x             | y             | z             |
|-------|-------|---------------|---------------|---------------|
| 1     | H1    | 1.860102E-04  | 2.065891E-04  | 6.481016E-04  |
| 2     | C1    | -1.195764E-04 | -2.838357E-04 | -6.501493E-04 |
| 3     | C2    | 5.172992E-05  | 8.031919E-04  | 6.697169E-04  |
| 4     | C3    | -1.711775E-04 | 2.453431E-05  | -9.632215E-05 |
| 5     | C4    | -2.263973E-04 | 6.377435E-04  | -6.824798E-05 |
| 6     | C5    | -1.901842E-04 | 2.904630E-04  | -3.555040E-04 |
| 7     | C6    | 2.682721E-04  | -3.775273E-04 | -1.403175E-04 |
| 8     | C7    | 5.315907E-04  | -2.037355E-04 | 1.311403E-04  |
| 9     | H3    | 9.301685E-05  | -6.531298E-05 | 1.743987E-04  |
| 10    | H4    | -4.474642E-05 | -1.723562E-04 | -1.568821E-04 |
| 11    | H6    | -1.754128E-04 | -3.073676E-04 | -5.985968E-04 |
| 12    | H7    | -5.866506E-04 | 3.421160E-05  | -3.750699E-05 |
| 13    | C10   | -8.190485E-04 | 8.372074E-05  | 1.125955E-04  |
| 14    | C8    | -2.573597E-04 | 3.550686E-04  | 2.625775E-05  |
| 15    | C16   | 1.888017E-04  | -3.063027E-04 | 9.169531E-05  |
| 16    | H12   | -9.271932E-05 | 6.021564E-05  | -5.580567E-05 |
| 17    | N2    | -3.872001E-06 | -3.801622E-05 | 3.467940E-04  |
| 18    | C9    | -8.431177E-04 | 2.330484E-03  | -3.153583E-03 |
| 19    | C17   | 4.859849E-04  | 5.341231E-04  | -7.721778E-04 |
| 20    | O1    | 1.160628E-03  | -2.878854E-03 | 3.348444E-03  |
| 21    | C11   | 8.396801E-04  | -1.059340E-04 | -3.874763E-04 |
| 22    | C12   | 5.545321E-05  | -2.641235E-04 | -5.216739E-04 |
| 23    | C13   | 3.778033E-04  | 6.269344E-05  | 5.148744E-05  |
| 24    | C14   | -1.493969E-04 | 2.565743E-04  | 4.807514E-04  |
| 25    | C15   | -3.390704E-04 | -4.628016E-05 | -2.185419E-04 |
| 26    | H19   | -2.508413E-04 | -6.985398E-05 | 2.026653E-06  |
| 27    | H20   | 3.829492E-05  | -3.969604E-05 | -2.971585E-05 |
| 28    | H21   | 1.966670E-04  | 8.326767E-05  | 1.013774E-04  |
| 29    | H22   | -5.999626E-05 | 3.946104E-05  | 1.112738E-04  |
| 30    | H23   | 1.940068E-04  | 1.475429E-04  | 2.894697E-04  |
| 31    | H24   | 1.335069E-04  | 3.551797E-05  | -1.687080E-05 |
| 32    | H25   | -1.931937E-04 | -1.115342E-04 | -7.408061E-05 |
| 33    | H11   | -6.403831E-05 | 7.979125E-05  | -2.925790E-05 |
| 34    | H2    | -8.910387E-05 | -1.994286E-04 | 9.318523E-05  |
| 35    | H5    | 6.360593E-05  | -1.926116E-04 | -1.323588E-04 |
| 36    | H8    | -5.292874E-04 | 1.604759E-04  | 4.777059E-04  |
| total |       | -3.401377E-04 | 5.629000E-04  | -3.386478E-04 |

end of program der1b

start of program geopt 10

geometry optimization step 10

reading input hessian of dimension 108  
in five columns format  
reading input hessian of dimension 108  
in five columns format

energy change: 1.8305E-06 # ( 5.0000E-05 )  
gradient maximum: 4.5629E-03 . ( 4.5000E-04 )  
gradient rms: 5.0397E-04 . ( 3.0000E-04 )  
step size: 0.03869 trust radius: 0.30000  
displacement maximum: 1.7978E-02 . ( 1.8000E-03 )  
displacement rms: 3.5033E-03 . ( 1.2000E-03 )  
predicted energy change: -2.7620E-05 geom step: 3.8695E-  
02 full step: 3.8695E-02  
molecular structure not yet converged...

center of mass moved by:

x: -1.3728E-03 y: 6.4620E-05 z: 8.4566E-04

new geometry:

|      | angstroms     |               |               |
|------|---------------|---------------|---------------|
| atom | x             | y             | z             |
| H1   | -0.6078392891 | 1.5257285909  | -1.8816305007 |
| C1   | -0.4147302906 | 1.9137246270  | -0.8996660553 |
| C2   | 0.0857348227  | 2.9227360072  | 1.6185727975  |
| C3   | 0.0923789062  | 1.0683075800  | 0.0727830963  |
| C4   | -0.6738447489 | 3.2507314171  | -0.6334863392 |
| C5   | -0.4268019504 | 3.7487534664  | 0.6300124967  |
| C6   | 0.3576187179  | 1.5883593416  | 1.3451887258  |
| C7   | 0.4163634610  | -0.3994704181 | -0.1681753778 |
| H3   | -1.0662753637 | 3.8867215880  | -1.4064765862 |
| H4   | -0.6314135796 | 4.7797403324  | 0.8591356889  |
| H6   | 0.2644285629  | 3.3240296078  | 2.5968451898  |
| H7   | 1.4960420487  | -0.4755128303 | -0.2968573232 |
| C10  | -0.2260049617 | -0.9817660355 | -1.4178557163 |
| C8   | 0.0633005965  | -1.2001103120 | 1.1039223674  |
| C16  | 0.3744436051  | -2.6925058953 | 0.9987930688  |
| H12  | -1.0015430019 | -1.0739635866 | 1.2991883729  |
| N2   | 0.9258266093  | 0.7550127080  | 2.3321143356  |
| C9   | 0.7714055444  | -0.6067833391 | 2.3145562494  |
| C17  | 1.5822316824  | 1.3482739795  | 3.4886284863  |
| O1   | 1.1640414096  | -1.2941795255 | 3.2155442382  |
| C11  | -1.3787368361 | -2.0920353232 | -3.7124020855 |
| C12  | 0.5634583814  | -1.4066069283 | -2.4771894323 |
| C13  | -1.6097696264 | -1.1162196731 | -1.5280304928 |
| C14  | -2.1803878157 | -1.6672081682 | -2.6604467317 |
| C15  | -0.0058123642 | -1.9576859369 | -3.6179949724 |
| H19  | 1.6338991581  | -1.3102539622 | -2.4143742672 |
| H20  | -2.2457892220 | -0.7809943209 | -0.7274668312 |

|     |               |               |               |
|-----|---------------|---------------|---------------|
| H21 | -3.2501428427 | -1.7642912954 | -2.7249712957 |
| H22 | 0.6264860420  | -2.2811666380 | -4.4262332624 |
| H23 | -1.8234640970 | -2.5208057986 | -4.5929780329 |
| H24 | 1.4240326077  | -2.8522883044 | 0.7711151093  |
| H25 | -0.2168556307 | -3.1491798774 | 0.2156647316  |
| H11 | 0.1615794593  | -3.1873685160 | 1.9356277210  |
| H2  | 2.2066290864  | 2.1704345145  | 3.1641607099  |
| H5  | 2.1902735396  | 0.5938499752  | 3.9577522952  |
| H8  | 0.8621805535  | 1.7135991017  | 4.2152328195  |

nuclear repulsion energy..... 1393.740001573 hartrees

-----  
 / end of geometry optimization iteration 10 /  
 -----

end of program geopt

start of program onee  
 smallest eigenvalue of S: 3.325E-04  
 number of canonical orbitals..... 368  
 end of program onee

start of program probe  
 end of program probe

start of program grid

number of gridpoints:

| atom     | H1  | C1  | C2  | C3  | C4  | C5  | C6  |
|----------|-----|-----|-----|-----|-----|-----|-----|
| C7       |     |     |     |     |     |     |     |
| grid # 1 | 71  | 88  | 89  | 88  | 89  | 87  | 86  |
| 82       |     |     |     |     |     |     |     |
| grid # 2 | 113 | 96  | 96  | 98  | 97  | 97  | 93  |
| 91       |     |     |     |     |     |     |     |
| grid # 3 | 213 | 184 | 183 | 192 | 183 | 183 | 191 |
| 175      |     |     |     |     |     |     |     |
| grid # 4 | 212 | 327 | 328 | 339 | 327 | 328 | 327 |
| 312      |     |     |     |     |     |     |     |

number of gridpoints:

| atom     | H3  | H4  | H6  | H7  | C10 | C8  | C16 |
|----------|-----|-----|-----|-----|-----|-----|-----|
| H12      |     |     |     |     |     |     |     |
| grid # 1 | 73  | 73  | 70  | 67  | 92  | 83  | 74  |
| 68       |     |     |     |     |     |     |     |
| grid # 2 | 118 | 118 | 112 | 106 | 100 | 91  | 80  |
| 110      |     |     |     |     |     |     |     |
| grid # 3 | 223 | 223 | 207 | 209 | 192 | 176 | 145 |
| 212      |     |     |     |     |     |     |     |

grid # 4      224      223      208      205      337      309      287  
208

number of gridpoints:

|          |     |     |     |     |     |     |     |
|----------|-----|-----|-----|-----|-----|-----|-----|
| atom     | N2  | C9  | C17 | O1  | C11 | C12 | C13 |
| C14      |     |     |     |     |     |     |     |
| grid # 1 | 94  | 81  | 70  | 111 | 89  | 87  | 87  |
| 89       |     |     |     |     |     |     |     |
| grid # 2 | 104 | 93  | 79  | 123 | 97  | 95  | 95  |
| 95       |     |     |     |     |     |     |     |
| grid # 3 | 213 | 176 | 143 | 257 | 182 | 182 | 183 |
| 183      |     |     |     |     |     |     |     |
| grid # 4 | 389 | 292 | 272 | 450 | 326 | 326 | 326 |
| 326      |     |     |     |     |     |     |     |

number of gridpoints:

|          |     |     |     |     |     |     |     |
|----------|-----|-----|-----|-----|-----|-----|-----|
| atom     | C15 | H19 | H20 | H21 | H22 | H23 | H24 |
| H25      |     |     |     |     |     |     |     |
| grid # 1 | 89  | 73  | 70  | 73  | 73  | 73  | 71  |
| 71       |     |     |     |     |     |     |     |
| grid # 2 | 97  | 113 | 113 | 118 | 118 | 118 | 110 |
| 110      |     |     |     |     |     |     |     |
| grid # 3 | 182 | 213 | 212 | 223 | 223 | 224 | 218 |
| 214      |     |     |     |     |     |     |     |
| grid # 4 | 326 | 213 | 210 | 223 | 224 | 224 | 219 |
| 213      |     |     |     |     |     |     |     |

number of gridpoints:

|          |     |     |     |     |       |
|----------|-----|-----|-----|-----|-------|
| atom     | H11 | H2  | H5  | H8  | total |
| grid # 1 | 71  | 71  | 70  | 71  | 2864  |
| grid # 2 | 108 | 111 | 108 | 111 | 3732  |
| grid # 3 | 218 | 215 | 213 | 217 | 7182  |
| grid # 4 | 214 | 213 | 209 | 218 | 9914  |

end of program grid

start of program rwr

end of program rwr

start of program scf

|      | i | u | d | i | g |                  | RMS     | maximum |
|------|---|---|---|---|---|------------------|---------|---------|
|      | t | p | i | c | r |                  | energy  | DIIS    |
|      | e | d | i | u | i | total energy     | density | error   |
|      | r | t | s | t | d | change           | change  |         |
| etot | 1 | N | N | 1 | U | -783.03394136022 | 4.9E-05 | 1.2E-03 |
| etot | 2 | Y | Y | 4 | M | -783.03429225493 | 3.5E-04 | 4.9E-04 |
| etot | 3 | Y | Y | 4 | M | -783.03433295116 | 4.1E-05 | 1.2E-04 |
| etot | 4 | Y | N | 4 | M | -783.03433544023 | 2.5E-06 | 0.0E+00 |

Energy components, in hartrees:

|     |                               |                   |       |
|-----|-------------------------------|-------------------|-------|
| (A) | Nuclear repulsion.....        | 1393.74000157308  |       |
| (E) | Total one-electron terms..... | -3831.96028880495 |       |
| (I) | Total two-electron terms..... | 1655.18595179163  |       |
| (L) | Electronic energy.....        | -2176.77433701331 | (E+I) |
| (N) | Total energy.....             | -783.03433544023  | (A+L) |

SCFE: SCF energy: HF -783.03433544023 hartrees iterations:

4

HOMO energy: -0.30113  
LUMO energy: 0.12745

Orbital energies:

|           |           |           |           |           |           |
|-----------|-----------|-----------|-----------|-----------|-----------|
| -20.52664 | -15.59996 | -11.34573 | -11.28413 | -11.25558 | -11.25097 |
| -11.24382 | -11.24304 | -11.24173 | -11.23663 | -11.23657 | -11.23601 |
| -11.23401 | -11.23383 | -11.23369 | -11.23347 | -11.23264 | -11.22730 |
| -11.20752 | -1.39750  | -1.26910  | -1.16892  | -1.14816  | -1.10677  |
| -1.03045  | -1.02004  | -1.01865  | -1.01520  | -0.95992  | -0.93285  |
| -0.85916  | -0.83805  | -0.83181  | -0.82993  | -0.78971  | -0.74360  |
| -0.71203  | -0.69625  | -0.68093  | -0.66510  | -0.64201  | -0.63608  |
| -0.62743  | -0.61881  | -0.61235  | -0.60464  | -0.59799  | -0.58834  |
| -0.57059  | -0.56056  | -0.55009  | -0.54029  | -0.52856  | -0.52089  |
| -0.51452  | -0.50478  | -0.49997  | -0.49672  | -0.48367  | -0.47053  |
| -0.46818  | -0.42005  | -0.41270  | -0.34297  | -0.33542  | -0.32757  |
| -0.30113  | 0.12745   | 0.13707   | 0.14161   | 0.15147   | 0.20359   |
| 0.23548   | 0.24206   | 0.25342   | 0.26127   | 0.27477   |           |

end of program scf

start of program derla  
end of program derla

start of program rwr  
end of program rwr

start of program derlb

forces (hartrees/bohr) : total

| atom | label | x             | y             | z             |
|------|-------|---------------|---------------|---------------|
| 1    | H1    | -7.810709E-05 | -8.964953E-05 | -1.985821E-04 |
| 2    | C1    | 3.812288E-05  | 3.842454E-05  | 1.624278E-04  |
| 3    | C2    | -1.219649E-04 | 6.408960E-05  | -3.043236E-04 |
| 4    | C3    | 8.842063E-05  | 1.756709E-05  | 3.326705E-04  |



|       |       |               |               |               |
|-------|-------|---------------|---------------|---------------|
| 5     | C4    | 2.756740E-05  | 1.663489E-04  | 1.991776E-04  |
| 6     | C5    | 5.528171E-05  | -1.760322E-04 | -1.639682E-04 |
| 7     | C6    | -1.936015E-04 | -6.266329E-05 | -7.170922E-04 |
| 8     | C7    | -1.126598E-04 | 1.266528E-04  | -1.520178E-05 |
| 9     | H3    | 1.270036E-05  | 4.947748E-05  | -6.250118E-05 |
| 10    | H4    | 1.377330E-05  | 5.069176E-05  | -1.920233E-05 |
| 11    | H6    | 4.409932E-05  | 8.452816E-05  | 1.142472E-04  |
| 12    | H7    | 4.614525E-05  | 3.815257E-06  | -4.714894E-05 |
| 13    | C10   | 1.387159E-04  | -6.290560E-05 | -1.149535E-04 |
| 14    | C8    | -1.032740E-04 | -7.459522E-05 | -2.573135E-04 |
| 15    | C16   | 9.782985E-06  | -5.294055E-05 | -3.057395E-05 |
| 16    | H12   | -2.224320E-05 | 1.707269E-05  | -2.357005E-05 |
| 17    | N2    | 7.689911E-05  | -1.504170E-04 | 5.062423E-04  |
| 18    | C9    | -5.122361E-04 | -1.334435E-05 | -1.831681E-04 |
| 19    | C17   | -1.547649E-04 | -1.239781E-04 | 3.338134E-04  |
| 20    | O1    | 5.592852E-04  | 3.074811E-04  | 2.436664E-04  |
| 21    | C11   | -1.585779E-04 | 1.220829E-04  | 2.861336E-04  |
| 22    | C12   | -8.877638E-05 | 1.520934E-04  | 2.839581E-04  |
| 23    | C13   | 2.040256E-04  | 3.845181E-05  | -3.802457E-05 |
| 24    | C14   | 1.093739E-04  | -1.629729E-04 | -4.053137E-04 |
| 25    | C15   | -2.547229E-04 | 3.516358E-05  | 8.338680E-05  |
| 26    | H19   | -3.314051E-05 | 2.615021E-05  | 5.911915E-05  |
| 27    | H20   | 3.148182E-06  | 2.537441E-05  | 3.128719E-05  |
| 28    | H21   | 3.609963E-05  | 2.844231E-06  | -2.611290E-05 |
| 29    | H22   | 2.184836E-06  | -1.277204E-05 | -1.439460E-05 |
| 30    | H23   | -3.497067E-05 | -2.946945E-05 | -5.724033E-05 |
| 31    | H24   | -3.684495E-05 | 6.332792E-05  | 2.707429E-05  |
| 32    | H25   | -1.823871E-05 | 1.198512E-05  | -6.748054E-05 |
| 33    | H11   | -9.700306E-06 | 6.765797E-05  | -1.014622E-08 |
| 34    | H2    | 8.353946E-05  | 6.815708E-05  | 7.393435E-05  |
| 35    | H5    | -1.453759E-04 | 1.442796E-04  | -6.724910E-05 |
| 36    | H8    | 2.091747E-04  | -1.272725E-04 | -2.382149E-04 |
| ----- |       | -----         | -----         | -----         |
|       | total | -3.208593E-04 | 5.447050E-04  | -3.145015E-04 |

end of program der1b

start of program geopt 11

geometry optimization step 11

reading input hessian of dimension 108

in five columns format

reading input hessian of dimension 108

in five columns format

reading input hessian of dimension 108

in five columns format

energy change: -1.5375E-05 \* ( 5.0000E-05 )

gradient maximum: 1.2333E-03 . ( 4.5000E-04 )

gradient rms: 2.0840E-04 \* ( 3.0000E-04 )

step size: 0.03638 trust radius: 0.30000  
 displacement maximum: 2.0266E-02 . ( 1.8000E-03 )  
 displacement rms: 3.2941E-03 . ( 1.2000E-03 )  
 predicted energy change: -1.1420E-05 geom step: 3.6384E-02  
 full step: 3.6384E-02  
 molecular structure not yet converged...

center of mass moved by:  
 x: 1.6121E-03 y: -8.7558E-05 z: -6.0102E-04

new geometry:

|      | angstroms     |               |               |
|------|---------------|---------------|---------------|
| atom | x             | y             | z             |
| H1   | -0.5935984515 | 1.5253691277  | -1.8860561063 |
| C1   | -0.4050751086 | 1.9139654377  | -0.9031715306 |
| C2   | 0.0823834468  | 2.9228330418  | 1.6168993776  |
| C3   | 0.0954787344  | 1.0677644296  | 0.0724622424  |
| C4   | -0.6633365950 | 3.2516270972  | -0.6395503974 |
| C5   | -0.4226094703 | 3.7494219990  | 0.6252116845  |
| C6   | 0.3540879810  | 1.5874470606  | 1.3460276235  |
| C7   | 0.4198918222  | -0.3994939817 | -0.1702937839 |
| H3   | -1.0497886920 | 3.8879451275  | -1.4152883120 |
| H4   | -0.6262193555 | 4.7809687202  | 0.8528463009  |
| H6   | 0.2563777084  | 3.3245195032  | 2.5959630361  |
| H7   | 1.4989383697  | -0.4746539180 | -0.3040493579 |
| C10  | -0.2276497686 | -0.9810661092 | -1.4175937392 |
| C8   | 0.0718055401  | -1.2031033148 | 1.1009170664  |
| C16  | 0.3897297154  | -2.6940199746 | 0.9924578794  |
| H12  | -0.9936546052 | -1.0821648706 | 1.2971479889  |
| N2   | 0.9159418981  | 0.7549076380  | 2.3382065804  |
| C9   | 0.7777827727  | -0.6082483248 | 2.3123104480  |
| C17  | 1.5610183486  | 1.3495244786  | 3.5002472528  |
| O1   | 1.1818495681  | -1.2955168580 | 3.2085577821  |
| C11  | -1.3913991842 | -2.0907496943 | -3.7064117421 |
| C12  | 0.5570206560  | -1.4096326614 | -2.4786017058 |
| C13  | -1.6120364124 | -1.1114101672 | -1.5230623473 |
| C14  | -2.1881783311 | -1.6620695393 | -2.6527680554 |
| C15  | -0.0178454719 | -1.9605007339 | -3.6165968112 |
| H19  | 1.6279564470  | -1.3165981585 | -2.4190088528 |
| H20  | -2.2442506448 | -0.7730900942 | -0.7207351840 |
| H21  | -3.2584089317 | -1.7558839400 | -2.7135462368 |
| H22  | 0.6108601570  | -2.2872224102 | -4.4263852447 |
| H23  | -1.8402333775 | -2.5195647362 | -4.5849195054 |
| H24  | 1.4407638362  | -2.8481397350 | 0.7668669450  |
| H25  | -0.1980556518 | -3.1514150949 | 0.2065910963  |
| H11  | 0.1768254931  | -3.1919938480 | 1.9277513551  |
| H2   | 2.1900224789  | 2.1711694553  | 3.1829814548  |
| H5   | 2.1629334047  | 0.5947946533  | 3.9764857450  |
| H8   | 0.8329033950  | 1.7155544758  | 4.2181598779  |

nuclear repulsion energy..... 1393.761377017 hartrees

/ end of geometry optimization iteration 11 /

-----  
end of program geopt

start of program onee  
smallest eigenvalue of S: 3.324E-04  
number of canonical orbitals..... 368  
end of program onee

start of program probe  
end of program probe

start of program grid

number of gridpoints:

| atom     | H1  | C1  | C2  | C3  | C4  | C5  | C6  |
|----------|-----|-----|-----|-----|-----|-----|-----|
| C7       |     |     |     |     |     |     |     |
| grid # 1 | 71  | 88  | 89  | 88  | 89  | 87  | 86  |
| 82       |     |     |     |     |     |     |     |
| grid # 2 | 113 | 96  | 96  | 98  | 97  | 97  | 93  |
| 91       |     |     |     |     |     |     |     |
| grid # 3 | 213 | 184 | 184 | 192 | 183 | 183 | 195 |
| 175      |     |     |     |     |     |     |     |
| grid # 4 | 213 | 327 | 328 | 338 | 327 | 328 | 328 |
| 311      |     |     |     |     |     |     |     |

number of gridpoints:

| atom     | H3  | H4  | H6  | H7  | C10 | C8  | C16 |
|----------|-----|-----|-----|-----|-----|-----|-----|
| H12      |     |     |     |     |     |     |     |
| grid # 1 | 73  | 73  | 70  | 66  | 91  | 83  | 73  |
| 68       |     |     |     |     |     |     |     |
| grid # 2 | 118 | 118 | 112 | 106 | 100 | 91  | 80  |
| 111      |     |     |     |     |     |     |     |
| grid # 3 | 223 | 223 | 207 | 209 | 192 | 176 | 146 |
| 212      |     |     |     |     |     |     |     |
| grid # 4 | 224 | 223 | 208 | 206 | 337 | 309 | 286 |
| 208      |     |     |     |     |     |     |     |

number of gridpoints:

| atom     | N2  | C9  | C17 | O1  | C11 | C12 | C13 |
|----------|-----|-----|-----|-----|-----|-----|-----|
| C14      |     |     |     |     |     |     |     |
| grid # 1 | 94  | 81  | 70  | 111 | 89  | 87  | 87  |
| 89       |     |     |     |     |     |     |     |
| grid # 2 | 103 | 93  | 79  | 123 | 97  | 95  | 95  |
| 95       |     |     |     |     |     |     |     |
| grid # 3 | 212 | 176 | 141 | 257 | 182 | 182 | 183 |
| 183      |     |     |     |     |     |     |     |

grid # 4      389      293      272      450      326      326      326  
 326

number of gridpoints:

| atom     | C15 | H19 | H20 | H21 | H22 | H23 | H24 |
|----------|-----|-----|-----|-----|-----|-----|-----|
| H25      |     |     |     |     |     |     |     |
| grid # 1 | 89  | 73  | 70  | 73  | 73  | 73  | 71  |
| 71       |     |     |     |     |     |     |     |
| grid # 2 | 97  | 113 | 113 | 118 | 118 | 118 | 110 |
| 110      |     |     |     |     |     |     |     |
| grid # 3 | 182 | 213 | 212 | 223 | 223 | 224 | 218 |
| 214      |     |     |     |     |     |     |     |
| grid # 4 | 326 | 213 | 210 | 223 | 224 | 224 | 219 |
| 213      |     |     |     |     |     |     |     |

number of gridpoints:

| atom     | H11 | H2  | H5  | H8  | total |
|----------|-----|-----|-----|-----|-------|
| grid # 1 | 71  | 71  | 70  | 71  | 2861  |
| grid # 2 | 108 | 111 | 108 | 111 | 3732  |
| grid # 3 | 218 | 215 | 213 | 217 | 7185  |
| grid # 4 | 214 | 213 | 209 | 218 | 9915  |

end of program grid

start of program rwr

end of program rwr

start of program scf

|      | i | u | d | i | g |                  | RMS     | maximum |
|------|---|---|---|---|---|------------------|---------|---------|
|      | t | p | i | c | r |                  | energy  | DIIS    |
|      | e | d | i | u | i | total energy     | density | error   |
|      | r | t | s | t | d | change           | change  |         |
| etot | 1 | N | N | 1 | U | -783.03399209554 | 4.6E-05 | 9.9E-04 |
| etot | 2 | Y | Y | 4 | M | -783.03430321865 | 3.1E-04 | 4.1E-04 |
| etot | 3 | Y | Y | 4 | M | -783.03433735612 | 3.4E-05 | 1.2E-04 |
| etot | 4 | Y | N | 4 | M | -783.03434086354 | 3.5E-06 | 0.0E+00 |

Energy components, in hartrees:

|     |                               |                   |       |
|-----|-------------------------------|-------------------|-------|
| (A) | Nuclear repulsion.....        | 1393.76137701651  |       |
| (E) | Total one-electron terms..... | -3831.99987497203 |       |
| (I) | Total two-electron terms..... | 1655.20415709198  |       |
| (L) | Electronic energy.....        | -2176.79571788005 | (E+I) |
| (N) | Total energy.....             | -783.03434086354  | (A+L) |

SCFE: SCF energy: HF      -783.03434086354 hartrees      iterations:

4

HOMO energy: -0.30113  
LUMO energy: 0.12734

Orbital energies:

|           |           |           |           |           |           |
|-----------|-----------|-----------|-----------|-----------|-----------|
| -20.52561 | -15.60069 | -11.34598 | -11.28452 | -11.25546 | -11.25116 |
| -11.24377 | -11.24335 | -11.24177 | -11.23650 | -11.23649 | -11.23602 |
| -11.23396 | -11.23386 | -11.23367 | -11.23340 | -11.23267 | -11.22725 |
| -11.20762 | -1.39725  | -1.26906  | -1.16909  | -1.14822  | -1.10690  |
| -1.03050  | -1.02015  | -1.01867  | -1.01518  | -0.96004  | -0.93288  |
| -0.85917  | -0.83814  | -0.83184  | -0.82997  | -0.78982  | -0.74353  |
| -0.71215  | -0.69629  | -0.68095  | -0.66501  | -0.64197  | -0.63621  |
| -0.62759  | -0.61863  | -0.61220  | -0.60455  | -0.59837  | -0.58837  |
| -0.57053  | -0.56074  | -0.54985  | -0.54025  | -0.52856  | -0.52088  |
| -0.51453  | -0.50487  | -0.49997  | -0.49676  | -0.48374  | -0.47053  |
| -0.46822  | -0.42011  | -0.41260  | -0.34303  | -0.33555  | -0.32746  |
| -0.30113  | 0.12734   | 0.13695   | 0.14163   | 0.15143   | 0.20381   |
| 0.23554   | 0.24202   | 0.25330   | 0.26130   | 0.27467   |           |

end of program scf

start of program derla  
end of program derla

start of program rwr  
end of program rwr

start of program der1b

forces (hartrees/bohr) : total

| atom | label | x             | y             | z             |
|------|-------|---------------|---------------|---------------|
| 1    | H1    | -5.038272E-05 | -3.430879E-06 | -4.127185E-05 |
| 2    | C1    | 4.748965E-05  | 1.436707E-05  | 8.927109E-05  |
| 3    | C2    | 3.883389E-05  | -1.767239E-04 | -1.390654E-04 |
| 4    | C3    | -1.960406E-05 | 9.362188E-05  | 3.028842E-05  |
| 5    | C4    | 4.797557E-05  | -9.604501E-05 | 1.187475E-04  |
| 6    | C5    | 9.352827E-06  | -2.287114E-05 | -7.718446E-05 |
| 7    | C6    | -8.233836E-05 | 9.440645E-05  | 6.572687E-06  |
| 8    | C7    | -1.291833E-04 | 3.833985E-05  | -6.946861E-05 |
| 9    | H3    | -6.231702E-05 | 5.146157E-05  | -3.933181E-05 |
| 10   | H4    | -3.415629E-05 | 4.792490E-05  | -7.092552E-07 |
| 11   | H6    | 2.078378E-05  | 6.600199E-05  | 1.001699E-05  |
| 12   | H7    | 1.004260E-04  | -3.494904E-06 | 1.723556E-05  |
| 13   | C10   | 6.574826E-05  | 1.081940E-05  | -8.635306E-07 |
| 14   | C8    | -7.916145E-05 | -6.733571E-05 | 7.370609E-05  |
| 15   | C16   | -4.835523E-05 | 2.554411E-05  | -7.266745E-05 |
| 16   | H12   | 1.132747E-04  | 9.984863E-06  | -5.333502E-05 |

|       |       |               |               |               |
|-------|-------|---------------|---------------|---------------|
| 17    | N2    | 2.611538E-05  | 1.790270E-04  | -4.273302E-04 |
| 18    | C9    | -2.244819E-04 | 8.988192E-05  | -1.428135E-04 |
| 19    | C17   | -2.270077E-05 | -1.772595E-04 | 3.678360E-04  |
| 20    | O1    | 3.138213E-05  | -3.691366E-05 | 1.640488E-04  |
| 21    | C11   | -3.910250E-05 | 6.374560E-06  | 2.450221E-06  |
| 22    | C12   | 3.346522E-05  | 1.069812E-04  | 1.836707E-04  |
| 23    | C13   | 6.953073E-05  | 6.251142E-05  | 8.647149E-05  |
| 24    | C14   | -5.576443E-05 | -8.132873E-05 | -1.537285E-04 |
| 25    | C15   | -7.550831E-05 | -2.866128E-05 | -7.673363E-05 |
| 26    | H19   | -3.401630E-05 | 1.645046E-05  | 6.883913E-06  |
| 27    | H20   | 3.427838E-06  | 1.245798E-05  | -9.792845E-06 |
| 28    | H21   | -1.879148E-05 | -3.616275E-06 | -3.593808E-05 |
| 29    | H22   | -2.482896E-05 | 2.591086E-06  | -1.608591E-05 |
| 30    | H23   | -2.822671E-05 | -9.722769E-06 | -7.631009E-05 |
| 31    | H24   | -1.578005E-04 | 1.157382E-05  | 5.086852E-05  |
| 32    | H25   | 1.030225E-04  | 1.167702E-04  | 1.408885E-04  |
| 33    | H11   | 4.589712E-05  | 1.998409E-05  | -3.581901E-05 |
| 34    | H2    | -1.374699E-05 | 2.739294E-05  | -3.050550E-05 |
| 35    | H5    | -4.836191E-05 | 1.793460E-04  | -5.284020E-05 |
| 36    | H8    | 1.808844E-04  | -1.504161E-05 | -1.184863E-04 |
| ----- |       | -----         | -----         | -----         |
|       | total | -3.112191E-04 | 5.613693E-04  | -3.213246E-04 |

end of program derlb

start of program geopt 12

geometry optimization step 12

reading input hessian of dimension 108

in five columns format

reading input hessian of dimension 108

in five columns format

reading input hessian of dimension 108

in five columns format

energy change: -5.4233E-06 \* ( 5.0000E-05 )

gradient maximum: 4.7893E-04 . ( 4.5000E-04 )

gradient rms: 1.0732E-04 \* ( 3.0000E-04 )

step size: 0.02080 trust radius: 0.30000

displacement maximum: 9.7038E-03 . ( 1.8000E-03 )

displacement rms: 1.8830E-03 . ( 1.2000E-03 )

predicted energy change: -5.7667E-06 geom step: 2.0799E-

02 full step: 2.0799E-02

molecular structure not yet converged...

center of mass moved by:

x: -8.0623E-04 y: 1.4286E-04 z: 1.2430E-04

new geometry:

angstroms

S274

| atom | x             | y             | z             |
|------|---------------|---------------|---------------|
| H1   | -0.6073568924 | 1.5237136662  | -1.8823399573 |
| C1   | -0.4132574313 | 1.9129243655  | -0.9005300812 |
| C2   | 0.0878291597  | 2.9236936494  | 1.6160967077  |
| C3   | 0.0920755393  | 1.0676189110  | 0.0732141482  |
| C4   | -0.6695794665 | 3.2508310669  | -0.6365785660 |
| C5   | -0.4216073809 | 3.7497692671  | 0.6262090355  |
| C6   | 0.3564609800  | 1.5881448103  | 1.3450742509  |
| C7   | 0.4161138831  | -0.3998697248 | -0.1682736666 |
| H3   | -1.0603332588 | 3.8865832498  | -1.4107872708 |
| H4   | -0.6232329737 | 4.7816742453  | 0.8540560776  |
| H6   | 0.2674993205  | 3.3262548416  | 2.5940031000  |
| H7   | 1.4956872174  | -0.4753405691 | -0.2990005913 |
| C10  | -0.2276672535 | -0.9820444319 | -1.4171249084 |
| C8   | 0.0657510594  | -1.2018427690 | 1.1034857617  |
| C16  | 0.3804762605  | -2.6934469230 | 0.9970964098  |
| H12  | -0.9991567848 | -1.0781218244 | 1.2996674453  |
| N2   | 0.9212477978  | 0.7551906248  | 2.3349277741  |
| C9   | 0.7740209648  | -0.6071958928 | 2.3137354032  |
| C17  | 1.5719093168  | 1.3480710312  | 3.4950812853  |
| O1   | 1.1748254874  | -1.2936705069 | 3.2119780506  |
| C11  | -1.3837488082 | -2.0909193702 | -3.7107852685 |
| C12  | 0.5602748554  | -1.4052326613 | -2.4777006917 |
| C13  | -1.6115270524 | -1.1174213169 | -1.5254865725 |
| C14  | -2.1838631314 | -1.6677719413 | -2.6575562630 |
| C15  | -0.0106969357 | -1.9556214346 | -3.6180434299 |
| H19  | 1.6307522154  | -1.3081187291 | -2.4162425044 |
| H20  | -2.2464479112 | -0.7832653688 | -0.7235119593 |
| H21  | -3.2536501932 | -1.7654498939 | -2.7204868024 |
| H22  | 0.6206515471  | -2.2779785309 | -4.4276036183 |
| H23  | -1.8293204095 | -2.5192695432 | -4.5913177455 |
| H24  | 1.4309150715  | -2.8501048232 | 0.7716830167  |
| H25  | -0.2080273356 | -3.1504446869 | 0.2120838127  |
| H11  | 0.1670804496  | -3.1896659673 | 1.9330464800  |
| H2   | 2.1996274802  | 2.1697910415  | 3.1750570863  |
| H5   | 2.1760208716  | 0.5931629668  | 3.9679968304  |
| H8   | 0.8478444334  | 1.7139257544  | 4.2165621306  |

nuclear repulsion energy..... 1393.740051355 hartrees

-----  
 / end of geometry optimization iteration 12 /  
 -----

end of program geopt

start of program onee

smallest eigenvalue of S: 3.322E-04

number of canonical orbitals..... 368

end of program onee

start of program probe  
end of program probe

start of program grid

number of gridpoints:

| atom     | H1  | C1  | C2  | C3  | C4  | C5  | C6  |
|----------|-----|-----|-----|-----|-----|-----|-----|
| C7       |     |     |     |     |     |     |     |
| grid # 1 | 71  | 88  | 89  | 88  | 89  | 87  | 86  |
| 82       |     |     |     |     |     |     |     |
| grid # 2 | 113 | 96  | 96  | 98  | 97  | 97  | 93  |
| 91       |     |     |     |     |     |     |     |
| grid # 3 | 213 | 184 | 183 | 192 | 183 | 183 | 195 |
| 175      |     |     |     |     |     |     |     |
| grid # 4 | 212 | 327 | 328 | 338 | 327 | 328 | 328 |
| 311      |     |     |     |     |     |     |     |

number of gridpoints:

| atom     | H3  | H4  | H6  | H7  | C10 | C8  | C16 |
|----------|-----|-----|-----|-----|-----|-----|-----|
| H12      |     |     |     |     |     |     |     |
| grid # 1 | 73  | 73  | 70  | 67  | 90  | 82  | 74  |
| 68       |     |     |     |     |     |     |     |
| grid # 2 | 118 | 118 | 112 | 106 | 100 | 91  | 80  |
| 111      |     |     |     |     |     |     |     |
| grid # 3 | 223 | 223 | 207 | 209 | 192 | 176 | 145 |
| 212      |     |     |     |     |     |     |     |
| grid # 4 | 224 | 223 | 208 | 205 | 337 | 309 | 287 |
| 208      |     |     |     |     |     |     |     |

number of gridpoints:

| atom     | N2  | C9  | C17 | O1  | C11 | C12 | C13 |
|----------|-----|-----|-----|-----|-----|-----|-----|
| C14      |     |     |     |     |     |     |     |
| grid # 1 | 94  | 81  | 70  | 111 | 89  | 87  | 87  |
| 89       |     |     |     |     |     |     |     |
| grid # 2 | 103 | 93  | 79  | 123 | 97  | 95  | 95  |
| 95       |     |     |     |     |     |     |     |
| grid # 3 | 213 | 176 | 142 | 257 | 182 | 182 | 183 |
| 183      |     |     |     |     |     |     |     |
| grid # 4 | 389 | 291 | 272 | 450 | 326 | 326 | 326 |
| 326      |     |     |     |     |     |     |     |

number of gridpoints:

| atom     | C15 | H19 | H20 | H21 | H22 | H23 | H24 |
|----------|-----|-----|-----|-----|-----|-----|-----|
| H25      |     |     |     |     |     |     |     |
| grid # 1 | 89  | 73  | 70  | 73  | 73  | 73  | 71  |
| 71       |     |     |     |     |     |     |     |
| grid # 2 | 97  | 113 | 113 | 118 | 118 | 118 | 110 |
| 110      |     |     |     |     |     |     |     |
| grid # 3 | 182 | 213 | 212 | 223 | 223 | 224 | 218 |
| 214      |     |     |     |     |     |     |     |



grid # 4        326     213     210     223     224     224     219  
 213

number of gridpoints:

| atom     | H11 | H2  | H5  | H8  | total |
|----------|-----|-----|-----|-----|-------|
| grid # 1 | 71  | 71  | 70  | 71  | 2861  |
| grid # 2 | 108 | 111 | 107 | 111 | 3731  |
| grid # 3 | 218 | 215 | 213 | 217 | 7185  |
| grid # 4 | 214 | 213 | 209 | 218 | 9912  |

end of program grid

start of program rwr

end of program rwr

start of program scf

|      | i | u | d | i | g |                  |          | RMS     | maximum |
|------|---|---|---|---|---|------------------|----------|---------|---------|
|      | t | p | i | c | r |                  |          | density | DIIS    |
|      | e | d | i | u | i | energy           | change   | change  | error   |
|      | r | t | s | t | d | total energy     |          |         |         |
| etot | 1 | N | N | 1 | U | -783.03420083779 |          | 3.0E-05 | 6.8E-04 |
| etot | 2 | Y | Y | 4 | M | -783.03432692125 | 1.3E-04  | 1.2E-05 | 2.3E-04 |
| etot | 3 | Y | Y | 4 | M | -783.03434327005 | 1.6E-05  | 3.3E-06 | 7.6E-05 |
| etot | 4 | Y | N | 4 | M | -783.03434219864 | -1.1E-06 | 0.0E+00 | 0.0E+00 |

Energy components, in hartrees:

|     |                               |                   |       |
|-----|-------------------------------|-------------------|-------|
| (A) | Nuclear repulsion.....        | 1393.74005135506  |       |
| (E) | Total one-electron terms..... | -3831.96157079990 |       |
| (I) | Total two-electron terms..... | 1655.18717724620  |       |
| (L) | Electronic energy.....        | -2176.77439355370 | (E+I) |
| (N) | Total energy.....             | -783.03434219864  | (A+L) |

SCFE: SCF energy: HF        -783.03434219864 hartrees    iterations:  
 4

HOMO energy:        -0.30110  
 LUMO energy:        0.12736

Orbital energies:

|           |           |           |           |           |           |
|-----------|-----------|-----------|-----------|-----------|-----------|
| -20.52629 | -15.59998 | -11.34569 | -11.28403 | -11.25537 | -11.25102 |
| -11.24382 | -11.24313 | -11.24165 | -11.23661 | -11.23657 | -11.23608 |
| -11.23396 | -11.23396 | -11.23378 | -11.23350 | -11.23257 | -11.22737 |
| -11.20752 | -1.39737  | -1.26883  | -1.16902  | -1.14822  | -1.10684  |
| -1.03051  | -1.02016  | -1.01862  | -1.01517  | -0.95989  | -0.93289  |
| -0.85914  | -0.83801  | -0.83184  | -0.82996  | -0.78973  | -0.74350  |
| -0.71209  | -0.69627  | -0.68087  | -0.66504  | -0.64195  | -0.63613  |

|          |          |          |          |          |          |
|----------|----------|----------|----------|----------|----------|
| -0.62750 | -0.61870 | -0.61228 | -0.60455 | -0.59811 | -0.58833 |
| -0.57059 | -0.56064 | -0.54988 | -0.54027 | -0.52854 | -0.52088 |
| -0.51455 | -0.50485 | -0.50000 | -0.49677 | -0.48370 | -0.47052 |
| -0.46820 | -0.42005 | -0.41264 | -0.34295 | -0.33552 | -0.32757 |
| -0.30110 | 0.12736  | 0.13705  | 0.14164  | 0.15147  | 0.20379  |
| 0.23548  | 0.24206  | 0.25337  | 0.26129  | 0.27469  |          |

end of program scf

start of program derla  
end of program derla

start of program rwr  
end of program rwr

start of program derlb

forces (hartrees/bohr) : total

| atom | label | x             | y             | z             |
|------|-------|---------------|---------------|---------------|
| 1    | H1    | 8.071198E-05  | 5.095699E-05  | 1.424365E-04  |
| 2    | C1    | -2.842678E-06 | -4.917564E-05 | -1.711653E-04 |
| 3    | C2    | -6.775573E-05 | 2.291933E-04  | 6.024684E-05  |
| 4    | C3    | -4.577852E-05 | -5.221800E-05 | -1.224681E-04 |
| 5    | C4    | -1.921893E-05 | 5.813724E-05  | 1.504679E-06  |
| 6    | C5    | -1.101094E-05 | 1.617310E-05  | -4.292541E-05 |
| 7    | C6    | 4.463637E-05  | -1.819969E-05 | 4.260803E-05  |
| 8    | C7    | -1.199106E-05 | -1.777390E-05 | -3.028820E-05 |
| 9    | H3    | 5.587173E-05  | -1.136255E-05 | 3.755564E-05  |
| 10   | H4    | -2.495721E-05 | 1.658040E-06  | -2.760971E-05 |
| 11   | H6    | -7.568571E-05 | -1.969821E-05 | -9.262860E-05 |
| 12   | H7    | -8.305769E-06 | 2.404577E-05  | -9.072828E-06 |
| 13   | C10   | -1.985094E-04 | 3.753055E-05  | 2.541633E-05  |
| 14   | C8    | 3.736078E-05  | 3.021919E-06  | -2.427377E-06 |
| 15   | C16   | 2.267186E-05  | 1.041961E-04  | 2.185742E-05  |
| 16   | H12   | -4.842537E-05 | 2.536326E-05  | -3.649629E-06 |
| 17   | N2    | -4.511609E-05 | 4.321185E-05  | 4.582465E-05  |
| 18   | C9    | 4.064552E-06  | 5.584315E-06  | -1.285220E-04 |
| 19   | C17   | 1.141878E-04  | 1.034934E-04  | -5.695981E-05 |
| 20   | O1    | 2.257018E-05  | -1.393803E-04 | 1.041672E-04  |
| 21   | C11   | 1.550269E-04  | -1.835205E-06 | -3.722847E-05 |
| 22   | C12   | 4.945254E-06  | -7.152869E-06 | -1.716240E-05 |
| 23   | C13   | 9.103410E-05  | 5.839915E-05  | 1.876719E-05  |
| 24   | C14   | 1.790959E-05  | 2.983951E-05  | 7.641090E-07  |
| 25   | C15   | -1.323647E-04 | -4.695856E-05 | -6.696346E-05 |
| 26   | H19   | -4.809622E-05 | -2.206898E-05 | 5.851227E-06  |
| 27   | H20   | 1.625447E-05  | 2.343135E-05  | -3.091705E-05 |
| 28   | H21   | 1.862995E-05  | 3.121685E-05  | -1.051434E-05 |

|       |       |               |               |               |
|-------|-------|---------------|---------------|---------------|
| 29    | H22   | -4.533792E-05 | -1.040017E-05 | 4.262036E-05  |
| 30    | H23   | 1.168462E-05  | 1.928602E-05  | 2.738866E-05  |
| 31    | H24   | 9.246487E-06  | 2.178443E-05  | -3.255970E-06 |
| 32    | H25   | -4.989110E-05 | -1.260823E-05 | -2.334741E-05 |
| 33    | H11   | -2.932134E-05 | 1.038159E-07  | 2.449929E-05  |
| 34    | H2    | -5.901152E-05 | -5.502665E-05 | 2.687955E-05  |
| 35    | H5    | -7.597745E-05 | 7.866496E-05  | -9.679017E-05 |
| 36    | H8    | -4.316473E-05 | 3.822545E-05  | 2.457594E-05  |
| ----- |       |               |               |               |
|       | total | -3.359558E-04 | 5.396585E-04  | -3.209327E-04 |

end of program derlb

start of program geopt 13

geometry optimization step 13

reading input hessian of dimension 108  
in five columns format  
reading input hessian of dimension 108  
in five columns format  
reading input hessian of dimension 108  
in five columns format

energy change: -1.3351E-06 # ( 5.0000E-05 )  
gradient maximum: 2.7004E-04 \* ( 4.5000E-04 )  
gradient rms: 7.9770E-05 \* ( 3.0000E-04 )  
step size: 0.01152 trust radius: 0.30000  
displacement maximum: 6.1467E-03 . ( 1.8000E-03 )  
displacement rms: 1.0432E-03 \* ( 1.2000E-03 )  
predicted energy change: -2.7211E-06 geom step: 1.1522E-02  
02 full step: 1.1522E-02

\*\*\*\*\*  
\*\* Geometry optimization complete \*\*  
\*\*\*\*\*

center of mass moved by:

x: 0.0000E+00 y: 0.0000E+00 z: 0.0000E+00

final geometry:

|      | angstroms     |               |               |
|------|---------------|---------------|---------------|
| atom | x             | y             | z             |
| H1   | -0.6073568924 | 1.5237136662  | -1.8823399573 |
| C1   | -0.4132574313 | 1.9129243655  | -0.9005300812 |
| C2   | 0.0878291597  | 2.9236936494  | 1.6160967077  |
| C3   | 0.0920755393  | 1.0676189110  | 0.0732141482  |
| C4   | -0.6695794665 | 3.2508310669  | -0.6365785660 |
| C5   | -0.4216073809 | 3.7497692671  | 0.6262090355  |
| C6   | 0.3564609800  | 1.5881448103  | 1.3450742509  |
| C7   | 0.4161138831  | -0.3998697248 | -0.1682736666 |

|     |               |               |               |
|-----|---------------|---------------|---------------|
| H3  | -1.0603332588 | 3.8865832498  | -1.4107872708 |
| H4  | -0.6232329737 | 4.7816742453  | 0.8540560776  |
| H6  | 0.2674993205  | 3.3262548416  | 2.5940031000  |
| H7  | 1.4956872174  | -0.4753405691 | -0.2990005913 |
| C10 | -0.2276672535 | -0.9820444319 | -1.4171249084 |
| C8  | 0.0657510594  | -1.2018427690 | 1.1034857617  |
| C16 | 0.3804762605  | -2.6934469230 | 0.9970964098  |
| H12 | -0.9991567848 | -1.0781218244 | 1.2996674453  |
| N2  | 0.9212477978  | 0.7551906248  | 2.3349277741  |
| C9  | 0.7740209648  | -0.6071958928 | 2.3137354032  |
| C17 | 1.5719093168  | 1.3480710312  | 3.4950812853  |
| O1  | 1.1748254874  | -1.2936705069 | 3.2119780506  |
| C11 | -1.3837488082 | -2.0909193702 | -3.7107852685 |
| C12 | 0.5602748554  | -1.4052326613 | -2.4777006917 |
| C13 | -1.6115270524 | -1.1174213169 | -1.5254865725 |
| C14 | -2.1838631314 | -1.6677719413 | -2.6575562630 |
| C15 | -0.0106969357 | -1.9556214346 | -3.6180434299 |
| H19 | 1.6307522154  | -1.3081187291 | -2.4162425044 |
| H20 | -2.2464479112 | -0.7832653688 | -0.7235119593 |
| H21 | -3.2536501932 | -1.7654498939 | -2.7204868024 |
| H22 | 0.6206515471  | -2.2779785309 | -4.4276036183 |
| H23 | -1.8293204095 | -2.5192695432 | -4.5913177455 |
| H24 | 1.4309150715  | -2.8501048232 | 0.7716830167  |
| H25 | -0.2080273356 | -3.1504446869 | 0.2120838127  |
| H11 | 0.1670804496  | -3.1896659673 | 1.9330464800  |
| H2  | 2.1996274802  | 2.1697910415  | 3.1750570863  |
| H5  | 2.1760208716  | 0.5931629668  | 3.9679968304  |
| H8  | 0.8478444334  | 1.7139257544  | 4.2165621306  |

nuclear repulsion energy..... 1393.740051355 hartrees

-----  
 / end of geometry optimization iteration 13 /  
 -----

end of program geopt

start of program post  
 Writing a SPARTAN archive file  
 end of program post

Total cpu seconds      user:            962.281      user+sys:        962.281

CIS 1 (PH\_AX - ME\_EQ)

```
+-----+
---+
| Jaguar version 3.5, release 42
|
|
| Copyright 1991-1998 Schrodinger, Inc.
|
| All Rights Reserved.
|
|
| Use of this program should be acknowledged in publications
as: |
| Jaguar 3.5, Schrodinger, Inc., Portland, Oregon, 1998.
|
+-----+
-----+
```

start of program pre  
Job name: WF32484  
Executables used: D:\TITAN  
Temporary files : C:\Users\gfabr\AppData\Local\Temp\WF32484

Input file comments:  
Molecule001  
This file created by Spartan

basis set: 6-31G\*\*  
net molecular charge: 0  
multiplicity: 1

number of basis functions.... 370

Input geometry:

|      | angstroms     |               |               |
|------|---------------|---------------|---------------|
| atom | x             | y             | z             |
| H1   | -1.0908480000 | 1.8329980000  | -2.2644300000 |
| C1   | -1.0340050000 | 2.0777930000  | -1.1971850000 |
| C2   | -0.8848920000 | 2.7070200000  | 1.5066230000  |
| C3   | -0.8895200000 | 1.0499730000  | -0.2640980000 |
| C4   | -1.1023190000 | 3.4031230000  | -0.7887820000 |
| C5   | -1.0277110000 | 3.7150800000  | 0.5649260000  |
| C6   | -0.8128850000 | 1.3653830000  | 1.1030560000  |
| C7   | -0.8287630000 | -0.3712940000 | -0.7489220000 |
| H3   | -1.2147720000 | 4.1999660000  | -1.5308820000 |
| H4   | -1.0828750000 | 4.7590490000  | 0.8907050000  |
| H6   | -0.8188550000 | 2.9597830000  | 2.5761920000  |
| C16  | 0.5634440000  | -0.7497030000 | -1.1889460000 |
| C8   | -1.4117240000 | -1.3116210000 | 0.3210810000  |

|     |               |               |               |
|-----|---------------|---------------|---------------|
| N2  | -0.7201180000 | 0.3261710000  | 2.1042620000  |
| C9  | -0.7698490000 | -1.0448430000 | 1.6722540000  |
| C10 | 0.0413580000  | 0.6448670000  | 3.3336860000  |
| O1  | -0.3734810000 | -1.9016560000 | 2.4444420000  |
| C23 | -1.3198870000 | -2.7688970000 | -0.0904430000 |
| C18 | 3.1135660000  | -1.4725030000 | -2.0799520000 |
| C19 | 0.7191740000  | -1.5184650000 | -2.3463610000 |
| C20 | 1.6989500000  | -0.3458140000 | -0.4858970000 |
| C21 | 2.9666510000  | -0.7065440000 | -0.9292470000 |
| C22 | 1.9869010000  | -1.8775050000 | -2.7877920000 |
| H2  | -0.1643020000 | -1.8464500000 | -2.9072260000 |
| H5  | 1.5937990000  | 0.2652760000  | 0.4186800000  |
| H7  | 3.8503860000  | -0.3855050000 | -0.3681160000 |
| H8  | 2.0975170000  | -2.4806210000 | -3.6948610000 |
| H9  | 4.1120330000  | -1.7559870000 | -2.4279520000 |
| H10 | -1.4965740000 | -0.4546810000 | -1.6459610000 |
| H19 | -0.2770840000 | -3.0936510000 | -0.2098020000 |
| H20 | -1.8277370000 | -2.9334580000 | -1.0503940000 |
| H21 | -1.7875140000 | -3.4251120000 | 0.6546050000  |
| H22 | -2.4958910000 | -1.0541430000 | 0.4393710000  |
| H11 | 1.1238530000  | 0.5115470000  | 3.1939130000  |
| H12 | -0.2877350000 | -0.0088720000 | 4.1524080000  |
| H13 | -0.1482920000 | 1.6892950000  | 3.6310450000  |

Molecular weight: 251.13 amu

Stoichiometry: C17NH17O

Molecular Point Group: C1

Point Group used: C1

nuclear repulsion energy..... 1412.765180051 hartrees

Non-default options chosen:

Geometry will be optimized in redundant internal coordinates

Initial Hessian: from previous calculation

end of program pre

start of program onee

smallest eigenvalue of S: 3.590E-04

number of canonical orbitals..... 368

end of program onee

start of program hfig

initial wavefunction generated automatically from atomic wavefunctions

| Irreducible representation | Total no orbitals | No of occupied orbitals |         |     |
|----------------------------|-------------------|-------------------------|---------|-----|
|                            |                   | Shell_1                 | Shell_2 | ... |
| No Symm                    | 368               | 67                      |         |     |

-----

Orbital occupation/shell 1.000

end of program hfig

start of program probe

end of program probe

start of program grid

number of gridpoints:

| atom     | H1  | C1  | C2  | C3  | C4  | C5  | C6  |
|----------|-----|-----|-----|-----|-----|-----|-----|
| C7       |     |     |     |     |     |     |     |
| grid # 1 | 72  | 89  | 89  | 90  | 89  | 89  | 89  |
| 81       |     |     |     |     |     |     |     |
| grid # 2 | 116 | 96  | 96  | 100 | 97  | 97  | 99  |
| 90       |     |     |     |     |     |     |     |
| grid # 3 | 216 | 184 | 184 | 194 | 185 | 185 | 188 |
| 176      |     |     |     |     |     |     |     |
| grid # 4 | 224 | 326 | 329 | 341 | 327 | 327 | 328 |
| 308      |     |     |     |     |     |     |     |

number of gridpoints:

| atom     | H3  | H4  | H6  | C16 | C8  | N2  | C9  |
|----------|-----|-----|-----|-----|-----|-----|-----|
| C10      |     |     |     |     |     |     |     |
| grid # 1 | 73  | 73  | 69  | 91  | 81  | 99  | 84  |
| 72       |     |     |     |     |     |     |     |
| grid # 2 | 118 | 118 | 109 | 100 | 90  | 108 | 94  |
| 80       |     |     |     |     |     |     |     |
| grid # 3 | 224 | 224 | 208 | 195 | 176 | 221 | 177 |
| 150      |     |     |     |     |     |     |     |
| grid # 4 | 232 | 232 | 214 | 339 | 309 | 395 | 300 |
| 285      |     |     |     |     |     |     |     |

number of gridpoints:

| atom     | O1  | C23 | C18 | C19 | C20 | C21 | C22 |
|----------|-----|-----|-----|-----|-----|-----|-----|
| H2       |     |     |     |     |     |     |     |
| grid # 1 | 111 | 72  | 89  | 88  | 88  | 89  | 88  |
| 70       |     |     |     |     |     |     |     |
| grid # 2 | 122 | 80  | 97  | 95  | 95  | 97  | 96  |
| 112      |     |     |     |     |     |     |     |
| grid # 3 | 259 | 152 | 184 | 184 | 183 | 184 | 184 |
| 214      |     |     |     |     |     |     |     |
| grid # 4 | 452 | 295 | 327 | 327 | 328 | 327 | 327 |
| 220      |     |     |     |     |     |     |     |

number of gridpoints:

| atom     | H5 | H7 | H8 | H9 | H10 | H19 | H20 |
|----------|----|----|----|----|-----|-----|-----|
| H21      |    |    |    |    |     |     |     |
| grid # 1 | 68 | 73 | 73 | 73 | 66  | 71  | 71  |
| 71       |    |    |    |    |     |     |     |

```

  grid # 2      109   118   118   118   107   110   109
110
  grid # 3      208   224   224   224   204   216   215
219
  grid # 4      215   232   232   232   202   218   220
225

```

number of gridpoints:

| atom     | H22 | H11 | H12 | H13 | total |
|----------|-----|-----|-----|-----|-------|
| grid # 1 | 69  | 72  | 71  | 69  | 2872  |
| grid # 2 | 113 | 111 | 111 | 105 | 3741  |
| grid # 3 | 220 | 218 | 217 | 204 | 7224  |
| grid # 4 | 217 | 223 | 224 | 209 | 10068 |

end of program grid

start of program rwr

end of program rwr

start of program scf

```

number of electrons..... 134
number of alpha electrons.... 67
number of beta electrons..... 67
number of orbitals, total.... 368
number of core orbitals..... 67
number of open shell orbs.... 0
number of occupied orbitals.. 67
number of virtual orbitals... 301
number of hamiltonians..... 1
number of shells..... 1

```

SCF type: HF

|      | i  | u | d | i | g |                  | RMS      | maximum |
|------|----|---|---|---|---|------------------|----------|---------|
|      | t  | p | i | c | r |                  | density  | DIIS    |
|      | e  | d | i | u | i | energy           | change   | error   |
|      | r  | t | s | t | d | total energy     |          |         |
| etot | 1  | N | N | 5 | M | -780.41271202123 | 4.7E-03  | 9.3E-02 |
| etot | 2  | Y | Y | 6 | M | -782.69608359237 | 2.3E+00  | 4.4E-02 |
| etot | 3  | Y | Y | 6 | M | -782.93430605039 | 2.4E-01  | 2.6E-02 |
| etot | 4  | N | Y | 2 | U | -782.99418281974 | 6.0E-02  | 1.6E-02 |
| etot | 5  | Y | Y | 6 | M | -783.00512732567 | 1.1E-02  | 9.4E-03 |
| etot | 6  | N | Y | 2 | U | -783.01159329142 | 6.5E-03  | 2.0E-03 |
| etot | 7  | Y | Y | 6 | M | -783.01198514407 | 3.9E-04  | 5.4E-04 |
| etot | 8  | Y | Y | 6 | M | -783.01205427891 | 6.9E-05  | 1.7E-04 |
| etot | 9  | N | Y | 2 | U | -783.01192756053 | -1.3E-04 | 4.2E-05 |
| etot | 10 | Y | Y | 6 | M | -783.01193574306 | 8.2E-06  | 2.4E-05 |
| etot | 11 | Y | N | 6 | M | -783.01193992884 | 4.2E-06  | 0.0E+00 |



Energy components, in hartrees:

|     |                               |                   |       |
|-----|-------------------------------|-------------------|-------|
| (A) | Nuclear repulsion.....        | 1412.76518005059  |       |
| (E) | Total one-electron terms..... | -3870.21884252928 |       |
| (I) | Total two-electron terms..... | 1674.44172254984  |       |
| (L) | Electronic energy.....        | -2195.77711997944 | (E+I) |
| (N) | Total energy.....             | -783.01193992884  | (A+L) |

SCFE: SCF energy: HF -783.01193992884 hartrees iterations:  
11

HOMO energy: -0.30125  
LUMO energy: 0.12625

Orbital energies:

|           |           |           |           |           |           |
|-----------|-----------|-----------|-----------|-----------|-----------|
| -20.53715 | -15.59909 | -11.35721 | -11.28812 | -11.26378 | -11.25438 |
| -11.25362 | -11.24377 | -11.24286 | -11.24221 | -11.24173 | -11.23943 |
| -11.23718 | -11.23677 | -11.23557 | -11.23461 | -11.23412 | -11.23363 |
| -11.21757 | -1.38363  | -1.24570  | -1.16565  | -1.14286  | -1.10822  |
| -1.03202  | -1.01568  | -1.01240  | -1.00827  | -0.94897  | -0.93014  |
| -0.85716  | -0.83123  | -0.82548  | -0.81905  | -0.79215  | -0.72822  |
| -0.70806  | -0.68929  | -0.66805  | -0.65889  | -0.63944  | -0.63211  |
| -0.62302  | -0.61313  | -0.60590  | -0.60366  | -0.59695  | -0.58144  |
| -0.57639  | -0.55035  | -0.53601  | -0.53452  | -0.52867  | -0.52111  |
| -0.51144  | -0.50619  | -0.49768  | -0.49477  | -0.48448  | -0.46783  |
| -0.46349  | -0.42535  | -0.40967  | -0.34376  | -0.33399  | -0.32118  |
| -0.30125  | 0.12625   | 0.13182   | 0.13657   | 0.14950   | 0.18956   |
| 0.22736   | 0.23102   | 0.23779   | 0.26005   | 0.27180   |           |

end of program scf

start of program derla  
end of program derla

start of program rwr  
end of program rwr

start of program derlb

forces (hartrees/bohr) : total

| atom | label | x             | y            | z             |
|------|-------|---------------|--------------|---------------|
| 1    | H1    | 9.141887E-04  | 2.298202E-03 | 1.437104E-02  |
| 2    | C1    | -2.767182E-04 | 3.821136E-03 | 3.637123E-04  |
| 3    | C2    | 1.602665E-03  | 1.032900E-03 | 9.262003E-03  |
| 4    | C3    | -5.409467E-03 | 1.377103E-02 | 3.226114E-03  |
| 5    | C4    | -1.007726E-03 | 7.572350E-03 | -8.943005E-03 |
| 6    | C5    | 5.966656E-04  | 5.965702E-03 | 1.579140E-03  |

|       |       |               |               |               |
|-------|-------|---------------|---------------|---------------|
| 7     | C6    | -7.512541E-03 | -4.946018E-03 | 7.824976E-03  |
| 8     | C7    | -1.829088E-02 | -1.149864E-05 | -1.165583E-02 |
| 9     | H3    | 1.306336E-03  | -9.881194E-03 | 9.265149E-03  |
| 10    | H4    | 6.785923E-04  | -1.336577E-02 | -3.689741E-03 |
| 11    | H6    | -4.773891E-03 | -8.074146E-04 | -2.377465E-02 |
| 12    | C16   | 9.177777E-03  | -4.456916E-03 | -9.468560E-03 |
| 13    | C8    | -1.642419E-02 | 3.417156E-03  | 2.538700E-03  |
| 14    | N2    | 1.081167E-02  | -1.241838E-02 | -3.089793E-02 |
| 15    | C9    | 1.635634E-02  | 8.125892E-03  | 5.980866E-02  |
| 16    | C10   | -5.338862E-03 | -4.882477E-03 | 6.973196E-03  |
| 17    | O1    | -1.643865E-02 | 2.684856E-02  | -3.694026E-02 |
| 18    | C23   | 2.996118E-03  | -2.064770E-02 | 2.453127E-03  |
| 19    | C18   | 8.026181E-03  | -2.386996E-03 | -2.887064E-03 |
| 20    | C19   | -1.036851E-03 | -9.535367E-04 | -2.613440E-03 |
| 21    | C20   | 2.783582E-04  | 3.253334E-03  | 6.366490E-03  |
| 22    | C21   | 6.232964E-03  | 1.641044E-03  | 4.793495E-03  |
| 23    | C22   | 1.063237E-03  | -5.212827E-03 | -7.267717E-03 |
| 24    | H2    | 1.181075E-02  | 5.187263E-03  | 7.186367E-03  |
| 25    | H5    | 2.762538E-03  | -8.464842E-03 | -1.403274E-02 |
| 26    | H7    | -1.104413E-02 | -3.889989E-03 | -6.993028E-03 |
| 27    | H8    | -1.291282E-03 | 7.468593E-03  | 1.101794E-02  |
| 28    | H9    | -1.232420E-02 | 3.703166E-03  | 4.203826E-03  |
| 29    | H10   | 1.352608E-02  | 1.291499E-03  | 1.878991E-02  |
| 30    | H19   | -1.124416E-02 | 3.527147E-03  | 2.918004E-03  |
| 31    | H20   | 2.955092E-03  | 3.331649E-03  | 7.698779E-03  |
| 32    | H21   | 4.082163E-03  | 6.890099E-03  | -6.069348E-03 |
| 33    | H22   | 1.990731E-02  | -9.912844E-04 | -4.465324E-04 |
| 34    | H11   | -9.733311E-03 | 4.534346E-04  | -3.985026E-04 |
| 35    | H12   | 3.644158E-03  | 6.090598E-03  | -1.193057E-02 |
| 36    | H13   | 3.356029E-03  | -2.116189E-02 | -3.614611E-03 |
| ----- |       | -----         | -----         | -----         |
|       | total | -6.163477E-05 | 1.212026E-03  | -9.829191E-04 |

end of program der1b

start of program geopt 1

geometry optimization step 1  
reading input hessian of dimension 108  
in five columns format

Level shifts adjusted to satisfy step-size constraints  
Step size: 0.3009844  
Cos(theta): 0.7576404

Final level shift: -5.5958388E-02

gradient maximum: 5.3766E-02 . ( 4.5000E-04 )  
gradient rms: 1.1859E-02 . ( 3.0000E-04 )  
step size: 0.30096 trust radius: 0.30000

displacement maximum: 9.1282E-02 . ( 1.8000E-03 )  
 displacement rms: 2.7248E-02 . ( 1.2000E-03 )  
 predicted energy change: -1.7469E-02 geom step: 3.0096E-01  
 full step: 3.0096E-01  
 molecular structure not yet converged...

center of mass moved by:  
 x: 2.3725E-02 y: 1.0467E-02 z: -2.0308E-02

new geometry:

|      | angstroms     |               |               |
|------|---------------|---------------|---------------|
| atom | x             | y             | z             |
| H1   | -1.1044073130 | 1.8713330404  | -2.2243375608 |
| C1   | -1.0564691793 | 2.1111638591  | -1.1743764605 |
| C2   | -0.9343062977 | 2.7085598799  | 1.5064722905  |
| C3   | -0.8945234637 | 1.0769838732  | -0.2611975240 |
| C4   | -1.1520226124 | 3.4316031757  | -0.7754905648 |
| C5   | -1.0938470655 | 3.7211010382  | 0.5755060778  |
| C6   | -0.8204327992 | 1.3750850041  | 1.1016212372  |
| C7   | -0.8059498557 | -0.3549639329 | -0.7486857811 |
| H3   | -1.2770658291 | 4.2140759379  | -1.5034719232 |
| H4   | -1.1765915218 | 4.7418251730  | 0.9115852278  |
| H6   | -0.9115955263 | 2.9749420037  | 2.5425376593  |
| C16  | 0.5941884749  | -0.7498371683 | -1.2071061919 |
| C8   | -1.3947650216 | -1.2763832191 | 0.3432281506  |
| N2   | -0.6677369204 | 0.3271469044  | 2.0551296154  |
| C9   | -0.7278054746 | -1.0116525274 | 1.6861171244  |
| C10  | 0.0022165691  | 0.5783951795  | 3.3397709721  |
| O1   | -0.3634093512 | -1.8970430890 | 2.4023312325  |
| C23  | -1.3868687925 | -2.7614078637 | 0.0010427935  |
| C18  | 3.1417425411  | -1.5171580064 | -2.0945587590 |
| C19  | 0.7525738427  | -1.5293553545 | -2.3548028060 |
| C20  | 1.7398017891  | -0.3500550504 | -0.5153615120 |
| C21  | 3.0022233054  | -0.7308772257 | -0.9514072119 |
| C22  | 2.0085137154  | -1.9143128599 | -2.7967410004 |
| H2   | -0.1154452680 | -1.8397270774 | -2.9142587637 |
| H5   | 1.6588842007  | 0.2513394486  | 0.3716041259  |
| H7   | 3.8724547532  | -0.4280729526 | -0.3956238749 |
| H8   | 2.1071676369  | -2.5181807822 | -3.6906214644 |
| H9   | 4.1176212054  | -1.8136960776 | -2.4382757552 |
| H10  | -1.4602749474 | -0.4516495797 | -1.6084472512 |
| H19  | -0.3760732710 | -3.1348526160 | -0.1136929194 |
| H20  | -1.9304140702 | -2.9194034975 | -0.9329190712 |
| H21  | -1.8768935520 | -3.3371040568 | 0.7762724172  |
| H22  | -2.4369050182 | -0.9742771518 | 0.4751987922  |
| H11  | 1.0870060763  | 0.5758183343  | 3.2367673367  |
| H12  | -0.2592759759 | -0.1819667151 | 4.0554160271  |
| H13  | -0.3132843899 | 1.5332050135  | 3.7076514697  |

nuclear repulsion energy..... 1414.123868993 hartrees

-----  
 / end of geometry optimization iteration 1 /

-----  
end of program geopt

start of program onee  
smallest eigenvalue of S: 3.373E-04  
number of canonical orbitals..... 368  
end of program onee

start of program probe  
end of program probe

start of program grid

number of gridpoints:

|     | atom     | H1  | C1  | C2  | C3  | C4  | C5  | C6  |
|-----|----------|-----|-----|-----|-----|-----|-----|-----|
| C7  |          |     |     |     |     |     |     |     |
|     | grid # 1 | 72  | 87  | 87  | 90  | 89  | 89  | 87  |
| 81  |          |     |     |     |     |     |     |     |
|     | grid # 2 | 116 | 96  | 96  | 100 | 97  | 97  | 98  |
| 90  |          |     |     |     |     |     |     |     |
|     | grid # 3 | 216 | 183 | 184 | 194 | 183 | 184 | 187 |
| 177 |          |     |     |     |     |     |     |     |
|     | grid # 4 | 216 | 326 | 330 | 338 | 328 | 328 | 328 |
| 311 |          |     |     |     |     |     |     |     |

number of gridpoints:

|     | atom     | H3  | H4  | H6  | C16 | C8  | N2  | C9  |
|-----|----------|-----|-----|-----|-----|-----|-----|-----|
| C10 |          |     |     |     |     |     |     |     |
|     | grid # 1 | 73  | 73  | 72  | 92  | 81  | 98  | 83  |
| 70  |          |     |     |     |     |     |     |     |
|     | grid # 2 | 118 | 118 | 109 | 100 | 90  | 107 | 91  |
| 78  |          |     |     |     |     |     |     |     |
|     | grid # 3 | 223 | 223 | 207 | 194 | 172 | 215 | 175 |
| 149 |          |     |     |     |     |     |     |     |
|     | grid # 4 | 224 | 223 | 208 | 342 | 315 | 391 | 295 |
| 272 |          |     |     |     |     |     |     |     |

number of gridpoints:

|     | atom     | O1  | C23 | C18 | C19 | C20 | C21 | C22 |
|-----|----------|-----|-----|-----|-----|-----|-----|-----|
| H2  |          |     |     |     |     |     |     |     |
|     | grid # 1 | 111 | 71  | 89  | 88  | 87  | 89  | 89  |
| 71  |          |     |     |     |     |     |     |     |
|     | grid # 2 | 122 | 79  | 97  | 95  | 96  | 97  | 96  |
| 112 |          |     |     |     |     |     |     |     |
|     | grid # 3 | 259 | 152 | 185 | 183 | 183 | 184 | 184 |
| 213 |          |     |     |     |     |     |     |     |
|     | grid # 4 | 451 | 290 | 330 | 326 | 327 | 329 | 328 |
| 211 |          |     |     |     |     |     |     |     |

```

number of gridpoints:
  atom      H5      H7      H8      H9      H10     H19     H20
H21
  grid # 1   70      73      73      73      67      70      71
70
  grid # 2  109     118     118     118     107     108     109
110
  grid # 3  209     223     223     223     203     216     217
218
  grid # 4  206     223     224     224     195     213     218
216

```

```

number of gridpoints:
  atom      H22     H11     H12     H13    total
grid # 1    69      72      71      68    2866
grid # 2   110     110     111     102   3725
grid # 3   215     219     215     206   7196
grid # 4   213     222     213     204   9938

```

end of program grid

start of program rwr  
end of program rwr

start of program scf

|      | i | u | d | i | g |                  | RMS     | maximum |
|------|---|---|---|---|---|------------------|---------|---------|
|      | t | p | i | c | r |                  | density | DIIS    |
|      | e | d | i | u | i | energy           | change  | error   |
|      | r | t | s | t | d | total energy     | change  |         |
| etot | 1 | N | N | 2 | U | -783.00933310167 |         | 1.3E-02 |
| etot | 2 | Y | Y | 6 | M | -783.02598064401 | 1.7E-02 | 3.2E-03 |
| etot | 3 | N | Y | 2 | U | -783.02773332114 | 1.8E-03 | 6.9E-04 |
| etot | 4 | Y | Y | 6 | M | -783.02788444362 | 1.5E-04 | 3.1E-04 |
| etot | 5 | Y | Y | 6 | M | -783.02790973935 | 2.5E-05 | 1.2E-04 |
| etot | 6 | Y | Y | 6 | M | -783.02791817692 | 8.4E-06 | 3.9E-05 |
| etot | 7 | Y | N | 6 | M | -783.02791924273 | 1.1E-06 | 0.0E+00 |

Energy components, in hartrees:

```

(A) Nuclear repulsion..... 1414.12386899302
(E) Total one-electron terms..... -3872.85319047084
(I) Total two-electron terms..... 1675.70140223508
(L) Electronic energy..... -2197.15178823576 (E+I)
(N) Total energy..... -783.02791924273 (A+L)

```

SCFE: SCF energy: HF -783.02791924273 hartrees iterations:

HOMO energy: -0.30333  
LUMO energy: 0.12836

Orbital energies:

|           |           |           |           |           |           |
|-----------|-----------|-----------|-----------|-----------|-----------|
| -20.53185 | -15.59935 | -11.34581 | -11.28966 | -11.25635 | -11.25019 |
| -11.24230 | -11.24206 | -11.24139 | -11.23921 | -11.23800 | -11.23629 |
| -11.23334 | -11.23266 | -11.23124 | -11.23074 | -11.23014 | -11.23000 |
| -11.20932 | -1.39882  | -1.26220  | -1.16381  | -1.14742  | -1.10460  |
| -1.02970  | -1.01808  | -1.01564  | -1.01219  | -0.95770  | -0.93204  |
| -0.85651  | -0.83579  | -0.83231  | -0.82125  | -0.79574  | -0.73755  |
| -0.71018  | -0.69332  | -0.67319  | -0.66307  | -0.64039  | -0.63870  |
| -0.62778  | -0.61496  | -0.61027  | -0.60855  | -0.59571  | -0.58358  |
| -0.57587  | -0.55544  | -0.54868  | -0.53657  | -0.53128  | -0.51815  |
| -0.51506  | -0.50631  | -0.49934  | -0.49767  | -0.48505  | -0.46785  |
| -0.46297  | -0.42636  | -0.40832  | -0.34266  | -0.33260  | -0.32075  |
| -0.30333  | 0.12836   | 0.13358   | 0.14092   | 0.15021   | 0.20190   |
| 0.23425   | 0.23735   | 0.24341   | 0.26405   | 0.27937   |           |

end of program scf

start of program derla  
end of program derla

start of program rwr  
recomputing RWR matrix 14 grid: 4  
end of program rwr

start of program derlb

forces (hartrees/bohr) : total

| atom | label | x             | y             | z             |
|------|-------|---------------|---------------|---------------|
| 1    | H1    | 1.946087E-04  | -6.323394E-04 | 1.067073E-03  |
| 2    | C1    | -3.357335E-04 | 5.259749E-04  | -1.102102E-03 |
| 3    | C2    | 5.286516E-05  | -1.451809E-03 | -2.294989E-03 |
| 4    | C3    | 7.209668E-04  | 2.728785E-03  | -1.559457E-03 |
| 5    | C4    | -2.422060E-04 | -1.457961E-03 | -8.168008E-04 |
| 6    | C5    | 5.954760E-04  | 3.916495E-04  | 1.242561E-03  |
| 7    | C6    | -4.780141E-03 | -1.330682E-03 | 3.085589E-03  |
| 8    | C7    | -2.056778E-03 | -2.588011E-03 | 2.251098E-03  |
| 9    | H3    | 2.055660E-04  | -5.001011E-04 | 5.343116E-04  |
| 10   | H4    | 9.717135E-05  | -1.729989E-03 | 5.532171E-04  |
| 11   | H6    | 1.362579E-04  | -4.194049E-04 | 1.212883E-03  |
| 12   | C16   | 5.655386E-03  | 3.360824E-04  | -2.207082E-03 |
| 13   | C8    | -9.681865E-04 | -1.058996E-03 | 3.247893E-03  |
| 14   | N2    | 1.395083E-02  | -1.244992E-02 | 5.072557E-03  |

S290

|       |       |               |               |               |
|-------|-------|---------------|---------------|---------------|
| 15    | C9    | -1.151127E-02 | 9.033872E-03  | -6.763898E-03 |
| 16    | C10   | 7.216619E-04  | 2.288058E-03  | -7.039939E-03 |
| 17    | O1    | 2.921105E-03  | 4.592952E-03  | 3.210847E-03  |
| 18    | C23   | -8.315517E-04 | -6.780812E-04 | -4.681604E-03 |
| 19    | C18   | -4.456733E-03 | 2.509035E-03  | 2.491796E-03  |
| 20    | C19   | -1.131771E-03 | 1.977221E-03  | 1.815298E-03  |
| 21    | C20   | 9.283051E-04  | -4.855396E-03 | -3.169261E-03 |
| 22    | C21   | -3.162859E-03 | -5.768785E-03 | -5.785207E-03 |
| 23    | C22   | 5.251910E-03  | 8.490794E-04  | 8.132036E-04  |
| 24    | H2    | 2.784072E-04  | 7.191179E-04  | 1.286099E-03  |
| 25    | H5    | -7.321159E-04 | 1.014848E-03  | -9.816183E-04 |
| 26    | H7    | -1.036353E-04 | 5.997502E-04  | -5.823325E-04 |
| 27    | H8    | -7.638392E-04 | 2.933477E-03  | 4.504432E-03  |
| 28    | H9    | -1.014318E-05 | 4.828876E-04  | 8.564544E-04  |
| 29    | H10   | 2.769634E-04  | 6.323669E-04  | -6.086040E-04 |
| 30    | H19   | -1.766919E-03 | -5.646867E-04 | 2.565555E-04  |
| 31    | H20   | 2.849561E-03  | -3.010745E-04 | 2.713736E-03  |
| 32    | H21   | 8.618090E-04  | 8.786714E-04  | 2.950647E-04  |
| 33    | H22   | 2.662997E-03  | 2.102258E-03  | -1.956764E-04 |
| 34    | H11   | -2.515887E-03 | 9.432685E-04  | -1.787281E-03 |
| 35    | H12   | -3.349230E-03 | -1.583293E-03 | -2.457370E-03 |
| 36    | H13   | 1.946383E-04  | 2.889798E-03  | 5.385236E-03  |
| ----- |       | -----         | -----         | -----         |
|       | total | -1.625217E-04 | 1.058626E-03  | -1.373169E-04 |

end of program derlb

start of program geopt 2

geometry optimization step 2

reading input hessian of dimension 108  
in five columns format

Level shifts adjusted to satisfy step-size constraints

Step size: 0.3004224

Cos(theta): 0.4752458

Final level shift: -1.0193408E-02

energy change: -1.5979E-02 . ( 5.0000E-05 )

gradient maximum: 1.3883E-02 . ( 4.5000E-04 )

gradient rms: 3.2740E-03 . ( 3.0000E-04 )

step size: 0.30032 trust radius: 0.30000

displacement maximum: 1.4458E-01 . ( 1.8000E-03 )

displacement rms: 2.7190E-02 . ( 1.2000E-03 )

predicted energy change: -3.0411E-03 geom step: 3.0032E-

01 full step: 3.0032E-01

molecular structure not yet converged...

center of mass moved by:

x: 9.4044E-03 y: -3.6558E-03 z: -5.4897E-03

new geometry:

|      | angstroms     |               |               |
|------|---------------|---------------|---------------|
| atom | x             | y             | z             |
| H1   | -1.1360697545 | 1.8742896078  | -2.2250669586 |
| C1   | -1.0840188615 | 2.1151581333  | -1.1805154533 |
| C2   | -0.9426935220 | 2.6908318472  | 1.5051736170  |
| C3   | -0.9005487287 | 1.0790625100  | -0.2757404890 |
| C4   | -1.1901160047 | 3.4300510037  | -0.7709666373 |
| C5   | -1.1229224671 | 3.7067201213  | 0.5834985759  |
| C6   | -0.8122468056 | 1.3664197448  | 1.0895365823  |
| C7   | -0.8035495303 | -0.3600011032 | -0.7556543070 |
| H3   | -1.3305739326 | 4.2152572254  | -1.4881300852 |
| H4   | -1.2149035435 | 4.7166035122  | 0.9354212552  |
| H6   | -0.9195458917 | 2.9454597831  | 2.5411422747  |
| C16  | 0.6065900665  | -0.7600676717 | -1.1987684706 |
| C8   | -1.4218257511 | -1.2550847214 | 0.3443807818  |
| N2   | -0.5804256437 | 0.3168091697  | 2.0161367163  |
| C9   | -0.7372176302 | -0.9906914408 | 1.6733491806  |
| C10  | 0.0498103660  | 0.5862375897  | 3.3046014253  |
| O1   | -0.3758180446 | -1.8682573311 | 2.3962863770  |
| C23  | -1.4681588409 | -2.7467585512 | 0.0219699547  |
| C18  | 3.1633959297  | -1.5162621679 | -2.0721964362 |
| C19  | 0.7767763762  | -1.5292988058 | -2.3491706197 |
| C20  | 1.7440894845  | -0.3807688249 | -0.4940736241 |
| C21  | 3.0067797454  | -0.7607484945 | -0.9195083335 |
| C22  | 2.0402485898  | -1.9013215486 | -2.7871331595 |
| H2   | -0.0857552719 | -1.8383658836 | -2.9087742654 |
| H5   | 1.6560392450  | 0.2289821634  | 0.3860345867  |
| H7   | 3.8680007309  | -0.4549663862 | -0.3526674223 |
| H8   | 2.1441734788  | -2.4771717074 | -3.6886626114 |
| H9   | 4.1426390988  | -1.7957748570 | -2.4096253936 |
| H10  | -1.4347344162 | -0.4605117222 | -1.6254863459 |
| H19  | -0.4768013365 | -3.1680587561 | -0.0702709643 |
| H20  | -1.9992991883 | -2.8990580916 | -0.9100200157 |
| H21  | -1.9899128036 | -3.2866754663 | 0.8024066192  |
| H22  | -2.4394701476 | -0.8910029944 | 0.4718169078  |
| H11  | 1.1210176656  | 0.7873111837  | 3.1580355925  |
| H12  | -0.0602355674 | -0.2910893768 | 3.9457674038  |
| H13  | -0.4238431094 | 1.4429866643  | 3.7983296778  |

nuclear repulsion energy..... 1416.623512852 hartrees

-----  
/ end of geometry optimization iteration 2 /  
-----

end of program geopt

start of program onee  
smallest eigenvalue of S: 3.329E-04

S292



number of canonical orbitals..... 368  
end of program onee

start of program probe  
end of program probe

start of program grid

number of gridpoints:

| atom     | H1  | C1  | C2  | C3  | C4  | C5  | C6  |
|----------|-----|-----|-----|-----|-----|-----|-----|
| C7       |     |     |     |     |     |     |     |
| grid # 1 | 72  | 87  | 87  | 90  | 89  | 87  | 84  |
| 82       |     |     |     |     |     |     |     |
| grid # 2 | 116 | 96  | 96  | 98  | 97  | 97  | 94  |
| 90       |     |     |     |     |     |     |     |
| grid # 3 | 215 | 182 | 184 | 196 | 183 | 184 | 189 |
| 174      |     |     |     |     |     |     |     |
| grid # 4 | 216 | 326 | 329 | 339 | 329 | 328 | 325 |
| 309      |     |     |     |     |     |     |     |

number of gridpoints:

| atom     | H3  | H4  | H6  | C16 | C8  | N2  | C9  |
|----------|-----|-----|-----|-----|-----|-----|-----|
| C10      |     |     |     |     |     |     |     |
| grid # 1 | 73  | 73  | 72  | 92  | 82  | 97  | 82  |
| 70       |     |     |     |     |     |     |     |
| grid # 2 | 118 | 118 | 110 | 100 | 91  | 105 | 92  |
| 79       |     |     |     |     |     |     |     |
| grid # 3 | 224 | 223 | 208 | 197 | 175 | 211 | 175 |
| 149      |     |     |     |     |     |     |     |
| grid # 4 | 224 | 223 | 208 | 339 | 309 | 387 | 291 |
| 280      |     |     |     |     |     |     |     |

number of gridpoints:

| atom     | O1  | C23 | C18 | C19 | C20 | C21 | C22 |
|----------|-----|-----|-----|-----|-----|-----|-----|
| H2       |     |     |     |     |     |     |     |
| grid # 1 | 111 | 74  | 89  | 88  | 87  | 89  | 89  |
| 71       |     |     |     |     |     |     |     |
| grid # 2 | 122 | 80  | 97  | 95  | 96  | 97  | 96  |
| 112      |     |     |     |     |     |     |     |
| grid # 3 | 256 | 150 | 184 | 183 | 182 | 184 | 183 |
| 213      |     |     |     |     |     |     |     |
| grid # 4 | 451 | 285 | 327 | 326 | 327 | 328 | 329 |
| 212      |     |     |     |     |     |     |     |

number of gridpoints:

| atom     | H5 | H7 | H8 | H9 | H10 | H19 | H20 |
|----------|----|----|----|----|-----|-----|-----|
| H21      |    |    |    |    |     |     |     |
| grid # 1 | 69 | 73 | 73 | 73 | 67  | 70  | 71  |
| 70       |    |    |    |    |     |     |     |

```

grid # 2      109   118   118   118   108   108   110
110
grid # 3      209   223   223   224   203   218   218
218
grid # 4      205   223   224   224   197   213   216
217

```

number of gridpoints:

| atom     | H22 | H11 | H12 | H13 | total |
|----------|-----|-----|-----|-----|-------|
| grid # 1 | 68  | 72  | 70  | 69  | 2862  |
| grid # 2 | 110 | 110 | 109 | 104 | 3724  |
| grid # 3 | 213 | 218 | 212 | 212 | 7195  |
| grid # 4 | 212 | 222 | 216 | 217 | 9933  |

end of program grid

start of program rwr

end of program rwr

start of program scf

|      | i | u | d | i | g |                  | RMS     | maximum |
|------|---|---|---|---|---|------------------|---------|---------|
|      | t | p | i | c | r |                  | energy  | DIIS    |
|      | e | d | i | u | i | total energy     | density | error   |
|      | r | t | s | t | d | change           | change  |         |
| etot | 1 | N | N | 2 | U | -783.01126167785 | 3.3E-04 | 1.0E-02 |
| etot | 2 | Y | Y | 6 | M | -783.02756536761 | 1.6E-02 | 2.3E-03 |
| etot | 3 | N | Y | 2 | U | -783.02941461835 | 1.8E-03 | 5.9E-04 |
| etot | 4 | Y | Y | 6 | M | -783.02952980645 | 1.2E-04 | 3.9E-04 |
| etot | 5 | Y | Y | 6 | M | -783.02955569322 | 2.6E-05 | 1.3E-04 |
| etot | 6 | Y | Y | 6 | M | -783.02955625824 | 5.7E-07 | 7.7E-05 |
| etot | 7 | Y | N | 6 | M | -783.02955823967 | 2.0E-06 | 0.0E+00 |

Energy components, in hartrees:

|     |                               |                   |       |
|-----|-------------------------------|-------------------|-------|
| (A) | Nuclear repulsion.....        | 1416.62351285185  |       |
| (E) | Total one-electron terms..... | -3877.84708094885 |       |
| (I) | Total two-electron terms..... | 1678.19400985733  |       |
| (L) | Electronic energy.....        | -2199.65307109152 | (E+I) |
| (N) | Total energy.....             | -783.02955823967  | (A+L) |

SCFE: SCF energy: HF -783.02955823967 hartrees iterations:

7

HOMO energy: -0.30329

LUMO energy: 0.12886

Orbital energies:

|           |           |           |           |           |           |
|-----------|-----------|-----------|-----------|-----------|-----------|
| -20.52393 | -15.59890 | -11.34104 | -11.28808 | -11.26075 | -11.25040 |
| -11.24254 | -11.24157 | -11.24091 | -11.23846 | -11.23747 | -11.23532 |
| -11.23132 | -11.23028 | -11.23027 | -11.22980 | -11.22842 | -11.22766 |
| -11.20910 | -1.40050  | -1.26814  | -1.16465  | -1.14898  | -1.10534  |
| -1.02968  | -1.01982  | -1.01688  | -1.01217  | -0.95912  | -0.93297  |
| -0.85644  | -0.83983  | -0.83320  | -0.82166  | -0.79562  | -0.74108  |
| -0.71109  | -0.69488  | -0.67387  | -0.66454  | -0.64360  | -0.63853  |
| -0.62759  | -0.61470  | -0.60960  | -0.60823  | -0.59616  | -0.58286  |
| -0.57644  | -0.55375  | -0.54498  | -0.53824  | -0.53275  | -0.51810  |
| -0.51548  | -0.50705  | -0.50060  | -0.49713  | -0.48496  | -0.46759  |
| -0.46327  | -0.42315  | -0.40789  | -0.34270  | -0.33191  | -0.32224  |
| -0.30329  | 0.12886   | 0.13437   | 0.14322   | 0.15119   | 0.20670   |
| 0.23147   | 0.23934   | 0.24427   | 0.26230   | 0.28157   |           |

end of program scf

start of program derla

end of program derla

start of program rwr

end of program rwr

start of program der1b

forces (hartrees/bohr) : total

| atom | label | x             | y             | z             |
|------|-------|---------------|---------------|---------------|
| 1    | H1    | -3.082926E-04 | -3.577662E-04 | -2.723169E-03 |
| 2    | C1    | -1.374969E-04 | -2.418166E-03 | 1.456064E-03  |
| 3    | C2    | 1.377452E-05  | -1.975922E-03 | -2.303282E-03 |
| 4    | C3    | 2.018110E-03  | -7.466640E-04 | -1.121869E-03 |
| 5    | C4    | 2.855550E-05  | -1.102416E-03 | 3.136204E-03  |
| 6    | C5    | -2.056760E-04 | -7.299525E-04 | -1.059909E-03 |
| 7    | C6    | -1.443225E-03 | 2.149661E-04  | -7.743155E-04 |
| 8    | C7    | 3.076217E-03  | 2.254134E-04  | 3.074695E-03  |
| 9    | H3    | -2.907090E-06 | 1.426743E-03  | -1.108113E-03 |
| 10   | H4    | -3.322195E-04 | 1.814071E-03  | 5.214524E-04  |
| 11   | H6    | 1.396287E-03  | 3.418925E-04  | 3.663329E-03  |
| 12   | C16   | -2.764643E-04 | -1.974808E-03 | -9.513047E-04 |
| 13   | C8    | 2.386595E-03  | 5.808208E-05  | -4.735133E-05 |
| 14   | N2    | -8.230422E-04 | 1.301818E-02  | 3.454141E-03  |
| 15   | C9    | -3.058066E-03 | -3.232140E-03 | -8.598742E-03 |
| 16   | C10   | 3.755395E-03  | 3.830755E-03  | 7.517243E-03  |
| 17   | O1    | 1.526089E-03  | -1.246560E-02 | 6.372886E-03  |
| 18   | C23   | -5.343014E-04 | 2.435888E-03  | 1.210217E-03  |
| 19   | C18   | -3.585844E-03 | 7.361023E-04  | 1.488049E-03  |
| 20   | C19   | 1.774767E-03  | 1.741698E-03  | 2.546390E-03  |
| 21   | C20   | 1.244480E-03  | 3.080191E-04  | 3.133983E-04  |

|       |       |               |               |               |
|-------|-------|---------------|---------------|---------------|
| 22    | C21   | -2.899414E-04 | -2.262326E-04 | -1.249966E-03 |
| 23    | C22   | -1.044410E-03 | 2.231700E-03  | 1.966240E-03  |
| 24    | H2    | -1.867735E-03 | -2.905530E-04 | -1.773009E-03 |
| 25    | H5    | -1.970375E-04 | -9.438230E-05 | 1.993314E-05  |
| 26    | H7    | 5.917706E-04  | 9.230519E-05  | -6.502731E-05 |
| 27    | H8    | -7.554945E-05 | -1.095927E-03 | -4.333006E-04 |
| 28    | H9    | 2.087984E-03  | -7.024403E-04 | -4.409341E-04 |
| 29    | H10   | -3.074972E-03 | 2.599989E-04  | -2.740369E-03 |
| 30    | H19   | 7.075277E-04  | 1.957997E-04  | 1.500077E-04  |
| 31    | H20   | -5.889766E-04 | -7.818218E-04 | -1.992273E-03 |
| 32    | H21   | 6.018829E-04  | 4.955222E-04  | 6.605755E-05  |
| 33    | H22   | -1.584246E-03 | -4.799049E-04 | -3.840279E-04 |
| 34    | H11   | -9.062111E-03 | 4.534365E-04  | 4.164608E-03  |
| 35    | H12   | 1.032214E-03  | 9.121153E-03  | -8.381801E-03 |
| 36    | H13   | 5.812112E-03  | -9.340463E-03 | -5.088915E-03 |
| ----- |       | -----         | -----         | -----         |
|       | total | -4.387537E-04 | 9.865719E-04  | -1.167636E-04 |

end of program derlb

start of program geopt 3

geometry optimization step 3

reading input hessian of dimension 108  
in five columns format

reading input hessian of dimension 108  
in five columns format

Level shifts adjusted to satisfy step-size constraints

Step size: 0.3000187  
Cos(theta): 0.4304456

Final level shift: -2.3415623E-02

energy change: -1.6390E-03 . ( 5.0000E-05 )

gradient maximum: 1.6008E-02 . ( 4.5000E-04 )

gradient rms: 3.3268E-03 . ( 3.0000E-04 )

step size: 0.30001 trust radius: 0.30000

displacement maximum: 1.4189E-01 . ( 1.8000E-03 )

displacement rms: 2.7162E-02 . ( 1.2000E-03 )

predicted energy change: -3.4265E-03 geom step: 3.0001E-

01 full step: 3.0001E-01

molecular structure not yet converged...

center of mass moved by:

x: -5.9121E-03 y: -8.8655E-04 z: 2.9321E-03

new geometry:

|      | angstroms |   |   |
|------|-----------|---|---|
| atom | x         | y | z |

|     |               |               |               |
|-----|---------------|---------------|---------------|
| H1  | -1.1493192298 | 1.8549570154  | -2.2333524104 |
| C1  | -1.0889707199 | 2.1012066989  | -1.1879689517 |
| C2  | -0.9198667501 | 2.6769792995  | 1.5030431629  |
| C3  | -0.8960253495 | 1.0688914711  | -0.2816578291 |
| C4  | -1.1918953639 | 3.4154289299  | -0.7687059651 |
| C5  | -1.1081724709 | 3.6941058353  | 0.5863385034  |
| C6  | -0.7993553177 | 1.3562670778  | 1.0844000074  |
| C7  | -0.8032988283 | -0.3721428087 | -0.7535023231 |
| H3  | -1.3375010225 | 4.2061158093  | -1.4826277171 |
| H4  | -1.1944911019 | 4.7020547520  | 0.9481100929  |
| H6  | -0.8713806391 | 2.9235448060  | 2.5484031802  |
| C16 | 0.6105468049  | -0.7661182892 | -1.1944206999 |
| C8  | -1.4370684163 | -1.2566808480 | 0.3430664849  |
| N2  | -0.5609220548 | 0.3171850594  | 2.0090130115  |
| C9  | -0.7733402972 | -0.9795796976 | 1.6704048202  |
| C10 | 0.0600028007  | 0.5985285071  | 3.2910755977  |
| O1  | -0.4197465597 | -1.8409690317 | 2.4296367502  |
| C23 | -1.4570554976 | -2.7454651033 | 0.0209145727  |
| C18 | 3.1631594968  | -1.5012243862 | -2.0755987501 |
| C19 | 0.7768837493  | -1.5234106775 | -2.3482403375 |
| C20 | 1.7460687721  | -0.3888219979 | -0.4919430700 |
| C21 | 3.0048742457  | -0.7613909560 | -0.9227307771 |
| C22 | 2.0444150447  | -1.8822940505 | -2.7876195566 |
| H2  | -0.0912186844 | -1.8350218347 | -2.9032575625 |
| H5  | 1.6490696112  | 0.2436445877  | 0.3783725401  |
| H7  | 3.8693043640  | -0.4359582748 | -0.3622568289 |
| H8  | 2.1462113417  | -2.4509827533 | -3.6892265640 |
| H9  | 4.1495791890  | -1.7709647155 | -2.4122289481 |
| H10 | -1.4319212987 | -0.4663217436 | -1.6368910492 |
| H19 | -0.4600411396 | -3.1610622982 | -0.0378645957 |
| H20 | -1.9434613706 | -2.9178713257 | -0.9266809129 |
| H21 | -1.9884094504 | -3.2866763685 | 0.7966882395  |
| H22 | -2.4517128350 | -0.8800950580 | 0.4457908417  |
| H11 | 1.0759014206  | 0.6927316915  | 3.1964041677  |
| H12 | -0.1529860282 | -0.1870859035 | 3.9118585895  |
| H13 | -0.2863540708 | 1.4456298553  | 3.7688514561  |

nuclear repulsion energy..... 1419.539075954 hartrees

-----  
 / end of geometry optimization iteration 3 /  
 -----

end of program geopt

start of program onee

smallest eigenvalue of S: 3.329E-04

number of canonical orbitals..... 368

end of program onee

start of program probe

end of program probe

start of program grid

number of gridpoints:

| atom     | H1  | C1  | C2  | C3  | C4  | C5  | C6  |
|----------|-----|-----|-----|-----|-----|-----|-----|
| C7       |     |     |     |     |     |     |     |
| grid # 1 | 72  | 87  | 88  | 90  | 89  | 87  | 85  |
| 82       |     |     |     |     |     |     |     |
| grid # 2 | 116 | 96  | 96  | 98  | 97  | 97  | 93  |
| 90       |     |     |     |     |     |     |     |
| grid # 3 | 217 | 180 | 184 | 196 | 184 | 184 | 193 |
| 175      |     |     |     |     |     |     |     |
| grid # 4 | 216 | 327 | 328 | 337 | 328 | 329 | 325 |
| 310      |     |     |     |     |     |     |     |

number of gridpoints:

| atom     | H3  | H4  | H6  | C16 | C8  | N2  | C9  |
|----------|-----|-----|-----|-----|-----|-----|-----|
| C10      |     |     |     |     |     |     |     |
| grid # 1 | 73  | 73  | 72  | 92  | 82  | 97  | 82  |
| 67       |     |     |     |     |     |     |     |
| grid # 2 | 118 | 118 | 110 | 100 | 90  | 106 | 91  |
| 76       |     |     |     |     |     |     |     |
| grid # 3 | 224 | 223 | 209 | 196 | 172 | 211 | 174 |
| 136      |     |     |     |     |     |     |     |
| grid # 4 | 224 | 223 | 209 | 339 | 313 | 388 | 294 |
| 263      |     |     |     |     |     |     |     |

number of gridpoints:

| atom     | O1  | C23 | C18 | C19 | C20 | C21 | C22 |
|----------|-----|-----|-----|-----|-----|-----|-----|
| H2       |     |     |     |     |     |     |     |
| grid # 1 | 111 | 71  | 89  | 88  | 87  | 88  | 88  |
| 71       |     |     |     |     |     |     |     |
| grid # 2 | 122 | 79  | 97  | 95  | 96  | 97  | 96  |
| 112      |     |     |     |     |     |     |     |
| grid # 3 | 258 | 154 | 183 | 183 | 182 | 182 | 182 |
| 213      |     |     |     |     |     |     |     |
| grid # 4 | 451 | 286 | 327 | 326 | 330 | 330 | 327 |
| 212      |     |     |     |     |     |     |     |

number of gridpoints:

| atom     | H5  | H7  | H8  | H9  | H10 | H19 | H20 |
|----------|-----|-----|-----|-----|-----|-----|-----|
| H21      |     |     |     |     |     |     |     |
| grid # 1 | 70  | 73  | 73  | 73  | 68  | 70  | 71  |
| 70       |     |     |     |     |     |     |     |
| grid # 2 | 109 | 118 | 118 | 118 | 107 | 110 | 108 |
| 108      |     |     |     |     |     |     |     |
| grid # 3 | 209 | 223 | 223 | 223 | 202 | 216 | 216 |
| 219      |     |     |     |     |     |     |     |
| grid # 4 | 205 | 223 | 223 | 224 | 200 | 212 | 213 |
| 218      |     |     |     |     |     |     |     |

number of gridpoints:

|          | atom | H22 | H11 | H12 | H13  | total |
|----------|------|-----|-----|-----|------|-------|
| grid # 1 | 68   | 70  | 69  | 68  | 2854 |       |
| grid # 2 | 111  | 109 | 107 | 104 | 3713 |       |
| grid # 3 | 215  | 212 | 206 | 203 | 7162 |       |
| grid # 4 | 212  | 213 | 210 | 206 | 9901 |       |

end of program grid

start of program rwr

end of program rwr

start of program scf

|      | i | u | d | i | g |                  | RMS     | maximum |
|------|---|---|---|---|---|------------------|---------|---------|
|      | t | p | i | c | r |                  | density | DIIS    |
|      | e | d | i | u | i | energy           | change  | error   |
|      | r | t | s | t | d | total energy     |         |         |
| etot | 1 | N | N | 2 | U | -783.01302857733 | 2.3E-04 | 5.8E-03 |
| etot | 2 | Y | Y | 6 | M | -783.02012638625 | 7.1E-03 | 1.4E-03 |
| etot | 3 | N | Y | 2 | U | -783.02079516149 | 6.7E-04 | 5.5E-04 |
| etot | 4 | Y | Y | 6 | M | -783.02088495478 | 9.0E-05 | 2.2E-04 |
| etot | 5 | Y | Y | 6 | M | -783.02089763379 | 1.3E-05 | 1.1E-04 |
| etot | 6 | Y | Y | 6 | M | -783.02089777146 | 1.4E-07 | 4.0E-05 |
| etot | 7 | Y | N | 6 | M | -783.02089839267 | 6.2E-07 | 0.0E+00 |

Energy components, in hartrees:

|     |                               |                   |       |
|-----|-------------------------------|-------------------|-------|
| (A) | Nuclear repulsion.....        | 1419.53907595437  |       |
| (E) | Total one-electron terms..... | -3883.59564636171 |       |
| (I) | Total two-electron terms..... | 1681.03567201467  |       |
| (L) | Electronic energy.....        | -2202.55997434705 | (E+I) |
| (N) | Total energy.....             | -783.02089839267  | (A+L) |

SCFE: SCF energy: HF -783.02089839267 hartrees iterations:

7

HOMO energy: -0.30130  
LUMO energy: 0.12937

Orbital energies:

|           |           |           |           |           |           |
|-----------|-----------|-----------|-----------|-----------|-----------|
| -20.52047 | -15.59739 | -11.34077 | -11.28493 | -11.25105 | -11.24365 |
| -11.24140 | -11.23981 | -11.23808 | -11.23773 | -11.23666 | -11.23413 |
| -11.23050 | -11.23034 | -11.22951 | -11.22925 | -11.22744 | -11.22697 |
| -11.20981 | -1.39598  | -1.26875  | -1.16619  | -1.14939  | -1.10795  |
| -1.03141  | -1.02051  | -1.01889  | -1.01252  | -0.97489  | -0.93373  |
| -0.86150  | -0.84070  | -0.83382  | -0.82162  | -0.79707  | -0.74148  |

|          |          |          |          |          |          |
|----------|----------|----------|----------|----------|----------|
| -0.71445 | -0.69607 | -0.67339 | -0.66638 | -0.64892 | -0.64008 |
| -0.62724 | -0.61523 | -0.61465 | -0.60687 | -0.60107 | -0.58268 |
| -0.57697 | -0.55583 | -0.54910 | -0.54255 | -0.53442 | -0.52076 |
| -0.51394 | -0.50947 | -0.50162 | -0.49716 | -0.48439 | -0.46724 |
| -0.46323 | -0.42313 | -0.40901 | -0.34306 | -0.33238 | -0.32328 |
| -0.30130 | 0.12937  | 0.13491  | 0.14364  | 0.15253  | 0.20638  |
| 0.23329  | 0.23913  | 0.24748  | 0.26358  | 0.28257  |          |

end of program scf

start of program derla  
end of program derla

start of program rwr  
end of program rwr

start of program derlb

forces (hartrees/bohr) : total

| atom | label | x             | y             | z             |
|------|-------|---------------|---------------|---------------|
| 1    | H1    | -3.568831E-04 | 1.109415E-03  | -9.209897E-04 |
| 2    | C1    | -2.034352E-05 | -1.371284E-03 | 3.412681E-03  |
| 3    | C2    | 6.594593E-04  | 8.082592E-04  | 3.460529E-03  |
| 4    | C3    | 7.149387E-04  | -1.108120E-03 | -2.771394E-05 |
| 5    | C4    | 4.143396E-05  | 1.674032E-03  | 1.156189E-03  |
| 6    | C5    | -6.124662E-04 | -7.993811E-04 | -2.016390E-03 |
| 7    | C6    | -9.979712E-04 | 3.541656E-03  | -4.343465E-03 |
| 8    | C7    | 1.651353E-03  | 4.281931E-03  | -3.413555E-03 |
| 9    | H3    | 2.770288E-05  | -6.347445E-06 | -5.799076E-05 |
| 10   | H4    | -2.518476E-04 | 1.548362E-03  | -1.172001E-03 |
| 11   | H6    | 1.090440E-06  | 5.570033E-05  | -2.801159E-03 |
| 12   | C16   | -5.590590E-03 | -2.884466E-03 | 1.078663E-04  |
| 13   | C8    | 3.901099E-03  | 2.198532E-03  | -4.843406E-03 |
| 14   | N2    | -9.004261E-03 | 2.417988E-02  | -9.148776E-03 |
| 15   | C9    | 1.316206E-02  | -1.263653E-02 | 1.555977E-02  |
| 16   | C10   | -2.091783E-02 | -8.387531E-03 | -2.588062E-02 |
| 17   | O1    | -6.362973E-03 | -1.077377E-02 | -5.313159E-03 |
| 18   | C23   | 1.064210E-05  | -1.697078E-03 | 7.251403E-03  |
| 19   | C18   | 3.920470E-03  | -2.525265E-03 | -1.577304E-03 |
| 20   | C19   | 2.348930E-03  | -5.013517E-04 | 8.022096E-04  |
| 21   | C20   | -1.561557E-03 | 6.977441E-03  | 5.496451E-03  |
| 22   | C21   | 5.480977E-03  | 6.943500E-03  | 6.945698E-03  |
| 23   | C22   | -6.692890E-03 | -4.001955E-04 | -1.293996E-03 |
| 24   | H2    | 6.932007E-04  | 1.607263E-04  | -1.484115E-03 |
| 25   | H5    | 1.565549E-03  | -4.176075E-03 | -2.465750E-03 |
| 26   | H7    | -2.106746E-03 | -1.924741E-03 | -1.496112E-03 |
| 27   | H8    | 6.593698E-04  | -2.594396E-03 | -3.254325E-03 |

S300



|       |       |               |               |               |
|-------|-------|---------------|---------------|---------------|
| 28    | H9    | -9.790639E-04 | -3.527771E-04 | -5.421059E-04 |
| 29    | H10   | 2.372693E-04  | -2.426165E-04 | 2.689595E-03  |
| 30    | H19   | 1.136903E-03  | 1.805316E-03  | 9.194666E-04  |
| 31    | H20   | -3.754292E-03 | -1.069086E-04 | -3.654333E-03 |
| 32    | H21   | 1.202550E-04  | 2.585181E-04  | -2.077064E-03 |
| 33    | H22   | -3.077850E-03 | -2.638022E-03 | -4.479005E-05 |
| 34    | H11   | 5.095475E-02  | 2.735351E-03  | -6.412508E-03 |
| 35    | H12   | -5.699583E-03 | -3.713791E-02 | 2.700621E-02  |
| 36    | H13   | -2.016409E-02 | 3.468502E-02  | 8.876179E-03  |
| ----- |       | -----         | -----         | -----         |
|       | total | -8.637910E-04 | 6.988612E-04  | -5.573905E-04 |

end of program derlb

start of program geopt 4

geometry optimization step 4

reading input hessian of dimension 108

in five columns format

reading input hessian of dimension 108

in five columns format

\*\* restarting optimization from step 3 \*\*

Level shifts adjusted to satisfy step-size constraints

Step size: 0.3000088

Cos(theta): 0.3468320

Final level shift: -4.6477544E-03

energy change: 8.6598E-03 . ( 5.0000E-05 )

gradient maximum: 1.6008E-02 . ( 4.5000E-04 )

gradient rms: 3.3268E-03 . ( 3.0000E-04 )

step size: 0.30000 trust radius: 0.30000

displacement maximum: 2.0871E-01 . ( 1.8000E-03 )

displacement rms: 2.7161E-02 . ( 1.2000E-03 )

predicted energy change: -2.1209E-03 geom step: 3.0000E-

01 full step: 3.0000E-01

molecular structure not yet converged...

center of mass moved by:

x: 3.0531E-16 y: 2.5674E-16 z: 1.8041E-16

new geometry:

|      | angstroms     |              |               |
|------|---------------|--------------|---------------|
| atom | x             | y            | z             |
| H1   | -1.1633551772 | 1.8563015717 | -2.2324942395 |
| C1   | -1.1020801029 | 2.1011419220 | -1.1855337355 |
| C2   | -0.9333770541 | 2.6928815163 | 1.4963997947  |
| C3   | -0.9068984257 | 1.0743675058 | -0.2756730726 |
| C4   | -1.2089092658 | 3.4181926731 | -0.7748811645 |

|     |               |               |               |
|-----|---------------|---------------|---------------|
| C5  | -1.1258719877 | 3.7062674442  | 0.5748592748  |
| C6  | -0.8190090682 | 1.3702307238  | 1.0842322605  |
| C7  | -0.8109219429 | -0.3637552418 | -0.7420620716 |
| H3  | -1.3525432390 | 4.2035165896  | -1.4947385471 |
| H4  | -1.2153541208 | 4.7187624676  | 0.9242781490  |
| H6  | -0.8792644236 | 2.9464446577  | 2.5369332952  |
| C16 | 0.5998135239  | -0.7609837907 | -1.1844367879 |
| C8  | -1.4346868045 | -1.2586593521 | 0.3496428123  |
| N2  | -0.6015805692 | 0.3402074299  | 2.0250700567  |
| C9  | -0.8000852167 | -0.9908956640 | 1.6976321864  |
| C10 | 0.1000734513  | 0.6280608397  | 3.2573210571  |
| O1  | -0.5241894247 | -1.8818723679 | 2.4504411667  |
| C23 | -1.4192955636 | -2.7455302146 | 0.0269498146  |
| C18 | 3.1453393606  | -1.5322304049 | -2.0545929201 |
| C19 | 0.7678565424  | -1.4549760980 | -2.3759341694 |
| C20 | 1.7347899681  | -0.4537889460 | -0.4360001075 |
| C21 | 2.9933213824  | -0.8374564436 | -0.8641945107 |
| C22 | 2.0277697011  | -1.8396421344 | -2.8090340544 |
| H2  | -0.0925439642 | -1.7059342518 | -2.9732360828 |
| H5  | 1.6392195545  | 0.0976658034  | 0.4776029570  |
| H7  | 3.8547949909  | -0.5851437026 | -0.2716841929 |
| H8  | 2.1297572060  | -2.3817742564 | -3.7353353249 |
| H9  | 4.1255838386  | -1.8263465003 | -2.3888709798 |
| H10 | -1.4531206240 | -0.4589074672 | -1.6138996699 |
| H19 | -0.4105096091 | -3.1316235194 | -0.0022191808 |
| H20 | -1.8804521048 | -2.9211740423 | -0.9393326761 |
| H21 | -1.9570009496 | -3.2972648333 | 0.7853575737  |
| H22 | -2.4613718355 | -0.9263682900 | 0.4438689715  |
| H11 | 1.1105134807  | 0.9761402849  | 3.0595440790  |
| H12 | 0.1347721393  | -0.2860870124 | 3.8277845169  |
| H13 | -0.4423094524 | 1.3804770232  | 3.8276914395  |

nuclear repulsion energy..... 1417.707311794 hartrees

-----  
 / end of geometry optimization iteration 4 /  
 -----

end of program geopt

start of program onee  
 smallest eigenvalue of S: 3.296E-04  
 number of canonical orbitals..... 368  
 end of program onee

start of program probe  
 end of program probe

start of program grid

| number of gridpoints: |      |     |     |     |     |     |     |     |
|-----------------------|------|-----|-----|-----|-----|-----|-----|-----|
|                       | atom | H1  | C1  | C2  | C3  | C4  | C5  | C6  |
| C7                    |      |     |     |     |     |     |     |     |
| grid # 1              |      | 72  | 87  | 87  | 90  | 89  | 87  | 84  |
| 82                    |      |     |     |     |     |     |     |     |
| grid # 2              |      | 116 | 97  | 96  | 99  | 97  | 97  | 94  |
| 90                    |      |     |     |     |     |     |     |     |
| grid # 3              |      | 217 | 182 | 183 | 194 | 184 | 183 | 185 |
| 175                   |      |     |     |     |     |     |     |     |
| grid # 4              |      | 216 | 326 | 328 | 338 | 328 | 328 | 324 |
| 312                   |      |     |     |     |     |     |     |     |

| number of gridpoints: |      |     |     |     |     |     |     |     |
|-----------------------|------|-----|-----|-----|-----|-----|-----|-----|
|                       | atom | H3  | H4  | H6  | C16 | C8  | N2  | C9  |
| C10                   |      |     |     |     |     |     |     |     |
| grid # 1              |      | 73  | 73  | 71  | 92  | 82  | 97  | 82  |
| 69                    |      |     |     |     |     |     |     |     |
| grid # 2              |      | 118 | 118 | 109 | 100 | 90  | 107 | 91  |
| 79                    |      |     |     |     |     |     |     |     |
| grid # 3              |      | 224 | 223 | 207 | 193 | 173 | 214 | 176 |
| 142                   |      |     |     |     |     |     |     |     |
| grid # 4              |      | 224 | 223 | 207 | 340 | 310 | 391 | 294 |
| 275                   |      |     |     |     |     |     |     |     |

| number of gridpoints: |      |     |     |     |     |     |     |     |
|-----------------------|------|-----|-----|-----|-----|-----|-----|-----|
|                       | atom | O1  | C23 | C18 | C19 | C20 | C21 | C22 |
| H2                    |      |     |     |     |     |     |     |     |
| grid # 1              |      | 111 | 73  | 89  | 88  | 88  | 89  | 89  |
| 71                    |      |     |     |     |     |     |     |     |
| grid # 2              |      | 122 | 80  | 97  | 95  | 96  | 97  | 96  |
| 112                   |      |     |     |     |     |     |     |     |
| grid # 3              |      | 256 | 148 | 183 | 182 | 183 | 184 | 183 |
| 212                   |      |     |     |     |     |     |     |     |
| grid # 4              |      | 448 | 287 | 327 | 326 | 327 | 327 | 327 |
| 211                   |      |     |     |     |     |     |     |     |

| number of gridpoints: |      |     |     |     |     |     |     |     |
|-----------------------|------|-----|-----|-----|-----|-----|-----|-----|
|                       | atom | H5  | H7  | H8  | H9  | H10 | H19 | H20 |
| H21                   |      |     |     |     |     |     |     |     |
| grid # 1              |      | 70  | 73  | 73  | 73  | 68  | 70  | 72  |
| 70                    |      |     |     |     |     |     |     |     |
| grid # 2              |      | 110 | 118 | 118 | 118 | 106 | 108 | 108 |
| 108                   |      |     |     |     |     |     |     |     |
| grid # 3              |      | 210 | 223 | 223 | 224 | 200 | 218 | 216 |
| 217                   |      |     |     |     |     |     |     |     |
| grid # 4              |      | 205 | 223 | 223 | 224 | 200 | 210 | 215 |
| 216                   |      |     |     |     |     |     |     |     |

| number of gridpoints: |      |     |     |     |     |       |
|-----------------------|------|-----|-----|-----|-----|-------|
|                       | atom | H22 | H11 | H12 | H13 | total |
| grid # 1              |      | 69  | 72  | 70  | 70  | 2865  |
| grid # 2              |      | 109 | 111 | 106 | 108 | 3721  |

```

grid # 3      215      219      212      212      7175
grid # 4      209      220      209      216      9914

```

end of program grid

```

start of program rwr
recomputing RWR matrix 14      grid: 4
end of program rwr

```

start of program scf

|      | i | u | d | i | g |                  | energy   | RMS     | maximum |
|------|---|---|---|---|---|------------------|----------|---------|---------|
|      | t | p | i | c | r |                  | change   | density | DIIS    |
|      | e | d | i | u | i | total energy     |          | change  | error   |
|      | r | t | s | t | d |                  |          |         |         |
| etot | 1 | N | N | 2 | U | -782.99741651887 |          | 4.2E-04 | 1.4E-02 |
| etot | 2 | Y | Y | 6 | M | -783.02714430037 | 3.0E-02  | 1.8E-04 | 4.6E-03 |
| etot | 3 | N | Y | 2 | U | -783.03065471497 | 3.5E-03  | 5.2E-05 | 1.3E-03 |
| etot | 4 | Y | Y | 6 | M | -783.03092186826 | 2.7E-04  | 2.5E-05 | 5.7E-04 |
| etot | 5 | Y | Y | 6 | M | -783.03096448040 | 4.3E-05  | 7.4E-06 | 1.9E-04 |
| etot | 6 | Y | Y | 6 | M | -783.03096754878 | 3.1E-06  | 4.0E-06 | 6.9E-05 |
| etot | 7 | Y | N | 6 | M | -783.03096691260 | -6.4E-07 | 0.0E+00 | 0.0E+00 |

Energy components, in hartrees:

```

(A) Nuclear repulsion..... 1417.70731179423
(E) Total one-electron terms..... -3879.95241723759
(I) Total two-electron terms..... 1679.21413853077
(L) Electronic energy..... -2200.73827870682 (E+I)
(N) Total energy..... -783.03096691260 (A+L)

```

SCFE: SCF energy: HF -783.03096691260 hartrees iterations:  
7

```

HOMO energy: -0.30305
LUMO energy: 0.12851

```

Orbital energies:

```

-20.52924 -15.59861 -11.34677 -11.28442 -11.25553 -11.25004
-11.24133 -11.24126 -11.24095 -11.23773 -11.23745 -11.23413
-11.23196 -11.23134 -11.23022 -11.23014 -11.22926 -11.22865
-11.20814 -1.39823 -1.26965 -1.16595 -1.14955 -1.10730
-1.03120 -1.01904 -1.01814 -1.01359 -0.96000 -0.93299
-0.85825 -0.83775 -0.83370 -0.82215 -0.79680 -0.74078
-0.71277 -0.69485 -0.67459 -0.66504 -0.64292 -0.63990
-0.62782 -0.61486 -0.61216 -0.61038 -0.59766 -0.58402
-0.57674 -0.55325 -0.54745 -0.53787 -0.53249 -0.51849
-0.51597 -0.50798 -0.50078 -0.49866 -0.48579 -0.46821

```

-0.46375   -0.42396   -0.40898   -0.34282   -0.33374   -0.32291  
-0.30305    0.12851    0.13390    0.14322    0.15264    0.20174  
 0.22945    0.23975    0.24199    0.26315    0.28317

end of program scf

start of program derla  
end of program derla

start of program rwr  
recomputing RWR matrix 14    grid: 4  
end of program rwr

start of program der1b

forces (hartrees/bohr) : total

| atom | label | x             | y             | z             |
|------|-------|---------------|---------------|---------------|
| 1    | H1    | 1.464204E-05  | 4.100440E-04  | 1.429785E-04  |
| 2    | C1    | -1.934440E-04 | 6.625458E-04  | 3.809673E-04  |
| 3    | C2    | 3.553541E-05  | 2.010971E-03  | 2.338527E-03  |
| 4    | C3    | -2.814063E-05 | -7.084640E-04 | -1.725607E-03 |
| 5    | C4    | 8.937528E-05  | 5.141429E-04  | -1.135960E-03 |
| 6    | C5    | 1.047709E-04  | -5.602961E-04 | 6.674672E-05  |
| 7    | C6    | -8.830665E-04 | 1.908109E-03  | -1.272690E-03 |
| 8    | C7    | -1.802835E-04 | 1.511958E-03  | -1.944819E-03 |
| 9    | H3    | -3.195135E-04 | 2.547806E-06  | -2.444269E-04 |
| 10   | H4    | 1.285197E-04  | 8.416326E-04  | -3.065592E-04 |
| 11   | H6    | 8.829953E-05  | -2.086844E-04 | -7.799027E-05 |
| 12   | C16   | -2.037599E-03 | -3.708856E-04 | 1.091438E-03  |
| 13   | C8    | 5.285677E-03  | 5.334815E-04  | -2.661344E-03 |
| 14   | N2    | 1.571448E-03  | -1.315674E-02 | -8.564086E-03 |
| 15   | C9    | -3.753237E-04 | 4.540180E-03  | 3.982317E-03  |
| 16   | C10   | -5.036975E-03 | 2.602461E-03  | 8.503628E-03  |
| 17   | O1    | 1.244286E-03  | 3.164417E-03  | 9.663999E-04  |
| 18   | C23   | -3.921881E-04 | -1.050751E-03 | 5.379541E-04  |
| 19   | C18   | 1.592684E-03  | -2.271867E-04 | 1.280388E-04  |
| 20   | C19   | 1.142277E-04  | -9.305281E-04 | -4.444689E-04 |
| 21   | C20   | -1.585496E-03 | -5.574615E-04 | -1.865744E-03 |
| 22   | C21   | -4.057457E-04 | 3.715028E-04  | -4.552219E-04 |
| 23   | C22   | -3.081876E-04 | -1.411942E-03 | -1.918443E-03 |
| 24   | H2    | 6.451544E-05  | 4.770104E-04  | 1.223478E-04  |
| 25   | H5    | 2.545576E-04  | 1.175920E-03  | 1.809985E-03  |
| 26   | H7    | 3.131506E-04  | -2.401508E-04 | 1.654977E-04  |
| 27   | H8    | 1.400414E-04  | 1.034914E-03  | 1.143974E-03  |
| 28   | H9    | -6.033220E-04 | 7.040285E-05  | 1.326459E-04  |
| 29   | H10   | 1.651611E-03  | -6.505141E-04 | 6.439674E-04  |
| 30   | H19   | 1.251459E-03  | 2.207528E-05  | -2.259209E-04 |

S305

|       |       |               |               |               |
|-------|-------|---------------|---------------|---------------|
| 31    | H20   | -1.191776E-03 | -4.697697E-04 | -9.416003E-05 |
| 32    | H21   | -1.132301E-03 | -8.413707E-04 | -6.256883E-04 |
| 33    | H22   | -4.766563E-03 | 9.381541E-04  | 3.613748E-04  |
| 34    | H11   | -1.156986E-03 | 1.313362E-03  | 6.536929E-04  |
| 35    | H12   | 1.653617E-03  | 2.348664E-03  | 5.855605E-04  |
| 36    | H13   | 4.772054E-03  | -3.883262E-03 | -1.372253E-04 |
| ----- |       | -----         | -----         | -----         |
|       | total | -2.264399E-04 | 1.186487E-03  | 5.768563E-05  |

end of program derlb

start of program geopt 5

geometry optimization step 5

reading input hessian of dimension 108  
in five columns format

reading input hessian of dimension 108  
in five columns format

Level shifts adjusted to satisfy step-size constraints

Step size: 0.3001009

Cos(theta): 0.4486299

Final level shift: -4.8335520E-03

energy change: -1.4087E-03 . ( 5.0000E-05 )

gradient maximum: 9.0972E-03 . ( 4.5000E-04 )

gradient rms: 2.2072E-03 . ( 3.0000E-04 )

step size: 0.30010 trust radius: 0.30000

displacement maximum: 2.0592E-01 . ( 1.8000E-03 )

displacement rms: 2.7170E-02 . ( 1.2000E-03 )

predicted energy change: -1.8588E-03 geom step: 3.0010E-

01 full step: 3.0010E-01

molecular structure not yet converged...

center of mass moved by:

x: 3.5588E-02 y: -1.2864E-03 z: -1.7007E-02

new geometry:

|      | angstroms     |               |               |
|------|---------------|---------------|---------------|
| atom | x             | y             | z             |
| H1   | -1.2175400770 | 1.8891052826  | -2.2177329589 |
| C1   | -1.1314297062 | 2.1230271475  | -1.1714197668 |
| C2   | -0.9028029714 | 2.6944881803  | 1.5135553850  |
| C3   | -0.9019009468 | 1.0878425486  | -0.2771188893 |
| C4   | -1.2437519012 | 3.4374570079  | -0.7509859213 |
| C5   | -1.1288300998 | 3.7125312626  | 0.6000330470  |
| C6   | -0.7841845123 | 1.3732251423  | 1.0876863759  |
| C7   | -0.8052084276 | -0.3493133277 | -0.7537163719 |
| H3   | -1.4220405433 | 4.2242805365  | -1.4617471887 |

S306

|     |               |               |               |
|-----|---------------|---------------|---------------|
| H4  | -1.2216472407 | 4.7226961691  | 0.9552563440  |
| H6  | -0.8355978117 | 2.9479178605  | 2.5491983407  |
| C16 | 0.5981943429  | -0.7589932800 | -1.2028624296 |
| C8  | -1.4200845787 | -1.2454522800 | 0.3459862471  |
| N2  | -0.5278245541 | 0.3182203051  | 1.9979875268  |
| C9  | -0.7528996285 | -0.9922136686 | 1.6891804531  |
| C10 | -0.0158299262 | 0.6023961828  | 3.3484557402  |
| O1  | -0.4629203846 | -1.8791586606 | 2.4321068004  |
| C23 | -1.4630815373 | -2.7381662148 | 0.0205574768  |
| C18 | 3.1405587001  | -1.5539040849 | -2.0693293663 |
| C19 | 0.7572742841  | -1.5327935091 | -2.3476846321 |
| C20 | 1.7420092775  | -0.3800780004 | -0.5080240027 |
| C21 | 2.9977907762  | -0.7773104015 | -0.9328209995 |
| C22 | 2.0134325565  | -1.9294715036 | -2.7794880433 |
| H2  | -0.1099334243 | -1.8292779118 | -2.9117304019 |
| H5  | 1.6639504359  | 0.2438317829  | 0.3630341675  |
| H7  | 3.8650378847  | -0.4748931292 | -0.3751628581 |
| H8  | 2.1079595795  | -2.5245349356 | -3.6681080206 |
| H9  | 4.1162528399  | -1.8593900805 | -2.3972518101 |
| H10 | -1.4431126629 | -0.4505981245 | -1.6199730510 |
| H19 | -0.4701613873 | -3.1364041874 | -0.0899990459 |
| H20 | -2.0113224545 | -2.9039570150 | -0.9004167911 |
| H21 | -1.9598129558 | -3.2850251643 | 0.8051757424  |
| H22 | -2.4445552636 | -0.8875109184 | 0.4634908948  |
| H11 | 1.0027822253  | 0.9879917141  | 3.2861897984  |
| H12 | -0.0146348396 | -0.3081264344 | 3.9162292564  |
| H13 | -0.6232269453 | 1.3263127769  | 3.8768996492  |

nuclear repulsion energy..... 1415.176077164 hartrees

-----  
 / end of geometry optimization iteration 5 /  
 -----

end of program geopt

start of program onee

smallest eigenvalue of S: 3.339E-04

number of canonical orbitals..... 368

end of program onee

start of program probe

end of program probe

start of program grid

number of gridpoints:

| atom | H1 | C1 | C2 | C3 | C4 | C5 | C6 |
|------|----|----|----|----|----|----|----|
| C7   |    |    |    |    |    |    |    |

|     |          |     |     |     |     |     |     |     |
|-----|----------|-----|-----|-----|-----|-----|-----|-----|
| 81  | grid # 1 | 72  | 87  | 87  | 90  | 89  | 87  | 85  |
| 90  | grid # 2 | 116 | 96  | 96  | 98  | 97  | 97  | 93  |
| 176 | grid # 3 | 216 | 182 | 184 | 196 | 183 | 184 | 195 |
| 312 | grid # 4 | 216 | 326 | 329 | 337 | 328 | 328 | 329 |

number of gridpoints:

|     |          |     |     |     |     |     |     |     |
|-----|----------|-----|-----|-----|-----|-----|-----|-----|
| C10 | atom     | H3  | H4  | H6  | C16 | C8  | N2  | C9  |
| 71  | grid # 1 | 73  | 73  | 71  | 92  | 82  | 95  | 81  |
| 78  | grid # 2 | 118 | 118 | 109 | 100 | 91  | 106 | 92  |
| 144 | grid # 3 | 224 | 223 | 207 | 195 | 176 | 211 | 175 |
| 275 | grid # 4 | 224 | 223 | 206 | 342 | 311 | 388 | 295 |

number of gridpoints:

|     |          |     |     |     |     |     |     |     |
|-----|----------|-----|-----|-----|-----|-----|-----|-----|
| H2  | atom     | O1  | C23 | C18 | C19 | C20 | C21 | C22 |
| 71  | grid # 1 | 111 | 74  | 89  | 88  | 87  | 89  | 89  |
| 112 | grid # 2 | 122 | 80  | 97  | 95  | 96  | 97  | 96  |
| 212 | grid # 3 | 256 | 144 | 183 | 182 | 182 | 183 | 183 |
| 211 | grid # 4 | 451 | 285 | 327 | 326 | 327 | 327 | 327 |

number of gridpoints:

|     |          |     |     |     |     |     |     |     |
|-----|----------|-----|-----|-----|-----|-----|-----|-----|
| H21 | atom     | H5  | H7  | H8  | H9  | H10 | H19 | H20 |
| 71  | grid # 1 | 71  | 73  | 73  | 73  | 67  | 70  | 71  |
| 110 | grid # 2 | 111 | 118 | 118 | 118 | 107 | 108 | 108 |
| 218 | grid # 3 | 209 | 222 | 223 | 223 | 202 | 217 | 217 |
| 216 | grid # 4 | 205 | 223 | 223 | 224 | 196 | 213 | 218 |

number of gridpoints:

|  |          |     |     |     |     |       |
|--|----------|-----|-----|-----|-----|-------|
|  | atom     | H22 | H11 | H12 | H13 | total |
|  | grid # 1 | 69  | 72  | 70  | 70  | 2864  |
|  | grid # 2 | 110 | 112 | 106 | 107 | 3723  |
|  | grid # 3 | 216 | 219 | 212 | 212 | 7186  |
|  | grid # 4 | 212 | 223 | 209 | 211 | 9923  |



end of program grid

start of program rwr

end of program rwr

start of program scf

|      | i | u | d | i | g |                  | RMS     | maximum |
|------|---|---|---|---|---|------------------|---------|---------|
|      | t | p | i | c | r |                  | density | DIIS    |
|      | e | d | i | u | i | energy           | change  | error   |
|      | r | t | s | t | d | total energy     |         |         |
| etot | 1 | N | N | 2 | U | -783.00565528562 |         | 1.3E-02 |
| etot | 2 | Y | Y | 6 | M | -783.02800145471 | 2.2E-02 | 5.2E-03 |
| etot | 3 | N | Y | 2 | U | -783.03083257570 | 2.8E-03 | 1.4E-03 |
| etot | 4 | Y | Y | 6 | M | -783.03098268390 | 1.5E-04 | 5.7E-04 |
| etot | 5 | Y | Y | 6 | M | -783.03101801400 | 3.5E-05 | 1.8E-04 |
| etot | 6 | Y | Y | 6 | M | -783.03102679647 | 8.8E-06 | 6.0E-05 |
| etot | 7 | Y | N | 6 | M | -783.03102700316 | 2.1E-07 | 0.0E+00 |

Energy components, in hartrees:

|     |                               |                   |       |
|-----|-------------------------------|-------------------|-------|
| (A) | Nuclear repulsion.....        | 1415.17607716368  |       |
| (E) | Total one-electron terms..... | -3874.95605560991 |       |
| (I) | Total two-electron terms..... | 1676.74895144308  |       |
| (L) | Electronic energy.....        | -2198.20710416683 | (E+I) |
| (N) | Total energy.....             | -783.03102700316  | (A+L) |

SCFE: SCF energy: HF -783.03102700316 hartrees iterations:

7

HOMO energy: -0.30253

LUMO energy: 0.12953

Orbital energies:

|           |           |           |           |           |           |
|-----------|-----------|-----------|-----------|-----------|-----------|
| -20.52568 | -15.60100 | -11.34352 | -11.28825 | -11.25769 | -11.24950 |
| -11.24220 | -11.24163 | -11.23974 | -11.23889 | -11.23804 | -11.23554 |
| -11.23051 | -11.23027 | -11.22907 | -11.22881 | -11.22731 | -11.22649 |
| -11.20732 | -1.40061  | -1.26749  | -1.16444  | -1.14866  | -1.10494  |
| -1.02910  | -1.01916  | -1.01726  | -1.01203  | -0.96151  | -0.93310  |
| -0.85759  | -0.83965  | -0.83306  | -0.82117  | -0.79602  | -0.74118  |
| -0.71093  | -0.69471  | -0.67347  | -0.66385  | -0.64386  | -0.63756  |
| -0.62727  | -0.61448  | -0.61116  | -0.60786  | -0.59555  | -0.58267  |
| -0.57636  | -0.55276  | -0.54906  | -0.54037  | -0.53356  | -0.51828  |
| -0.51470  | -0.50688  | -0.50069  | -0.49741  | -0.48420  | -0.46856  |
| -0.46230  | -0.42299  | -0.40995  | -0.34211  | -0.33203  | -0.32252  |
| -0.30253  | 0.12953   | 0.13450   | 0.14466   | 0.15174   | 0.20709   |
| 0.23131   | 0.24045   | 0.24714   | 0.26252   | 0.28489   |           |

end of program scf

start of program derla

end of program derla

start of program rwr

end of program rwr

start of program derlb

forces (hartrees/bohr) : total

| atom | label | x             | y             | z             |
|------|-------|---------------|---------------|---------------|
| 1    | H1    | -9.772272E-05 | -4.189946E-04 | -8.617804E-04 |
| 2    | C1    | 2.892658E-04  | -1.044628E-03 | 9.403658E-04  |
| 3    | C2    | -3.852789E-04 | -6.887077E-04 | -2.366643E-03 |
| 4    | C3    | 6.994017E-04  | 1.156130E-03  | -5.214725E-04 |
| 5    | C4    | 2.227282E-04  | -1.322025E-03 | 1.865788E-03  |
| 6    | C5    | -7.378215E-05 | -1.181298E-03 | -9.430545E-04 |
| 7    | C6    | -6.531849E-04 | -1.235538E-03 | -1.486967E-03 |
| 8    | C7    | 1.790404E-03  | -1.161458E-03 | 1.688684E-03  |
| 9    | H3    | 1.791568E-04  | -1.137047E-05 | 1.725852E-04  |
| 10   | H4    | 1.315490E-04  | 6.488483E-04  | 5.624561E-04  |
| 11   | H6    | 1.301057E-03  | -3.265359E-04 | 3.037153E-03  |
| 12   | C16   | 7.609630E-05  | 1.061713E-03  | 5.856959E-04  |
| 13   | C8    | -1.713497E-03 | -1.298434E-03 | -7.510117E-05 |
| 14   | N2    | 3.187611E-04  | 1.143298E-02  | 1.677951E-02  |
| 15   | C9    | -3.001685E-03 | 4.365987E-04  | -1.424916E-02 |
| 16   | C10   | 5.239394E-03  | 5.428258E-03  | -7.204355E-03 |
| 17   | O1    | 9.472003E-04  | -9.054205E-03 | 7.952017E-03  |
| 18   | C23   | -1.913171E-03 | 5.482054E-03  | -1.191674E-03 |
| 19   | C18   | -8.034273E-04 | -8.017305E-04 | -5.108291E-04 |
| 20   | C19   | -8.529842E-04 | -2.264568E-04 | -2.443258E-04 |
| 21   | C20   | 5.536663E-04  | 1.326195E-03  | 1.300569E-03  |
| 22   | C21   | 4.955351E-06  | 2.285444E-04  | 5.610014E-04  |
| 23   | C22   | -6.142856E-04 | 1.113482E-03  | 1.248098E-03  |
| 24   | H2    | -5.417473E-04 | -1.940381E-04 | -2.996522E-04 |
| 25   | H5    | -4.606561E-04 | -4.813773E-04 | 1.537452E-04  |
| 26   | H7    | 9.641438E-04  | 4.738561E-04  | 5.131780E-04  |
| 27   | H8    | 5.102141E-05  | -1.088101E-03 | -1.475104E-03 |
| 28   | H9    | 1.429508E-03  | -3.948510E-04 | -7.109323E-04 |
| 29   | H10   | -2.406398E-03 | 1.854263E-04  | -2.272604E-03 |
| 30   | H19   | 4.092032E-03  | -2.740082E-03 | -5.014442E-04 |
| 31   | H20   | 2.337552E-04  | 5.880185E-04  | -1.844656E-03 |
| 32   | H21   | -7.434519E-04 | -7.530827E-04 | 3.108658E-03  |
| 33   | H22   | 4.976110E-04  | -5.729292E-04 | 6.266125E-04  |
| 34   | H11   | -3.687089E-03 | -7.376619E-04 | 6.463941E-04  |
| 35   | H12   | 7.167595E-04  | -2.611610E-03 | -1.701288E-03 |

|       |       |               |               |               |
|-------|-------|---------------|---------------|---------------|
| 36    | H13   | -2.454741E-03 | -3.064387E-04 | -3.360829E-03 |
| ----- |       |               |               |               |
|       | total | -6.646360E-04 | 9.105446E-04  | -7.935643E-05 |

end of program derlb

start of program geopt 6

geometry optimization step 6  
 reading input hessian of dimension 108  
 in five columns format  
 reading input hessian of dimension 108  
 in five columns format

Level shifts adjusted to satisfy step-size constraints

Step size: 0.3000057  
 Cos(theta): 0.4865671

Final level shift: -2.0679667E-02

energy change: -6.0091E-05 . ( 5.0000E-05 )  
 gradient maximum: 1.1941E-02 . ( 4.5000E-04 )  
 gradient rms: 2.8233E-03 . ( 3.0000E-04 )  
 step size: 0.30001 trust radius: 0.30000  
 displacement maximum: 2.1374E-01 . ( 1.8000E-03 )  
 displacement rms: 2.7161E-02 . ( 1.2000E-03 )  
 predicted energy change: -3.2067E-03 geom step: 3.0001E-01  
 01 full step: 3.0001E-01  
 molecular structure not yet converged...

center of mass moved by:

x: -3.3058E-02 y: -1.3446E-03 z: 1.6301E-02

new geometry:

|      | angstroms     |               |               |
|------|---------------|---------------|---------------|
| atom | x             | y             | z             |
| H1   | -1.2021312988 | 1.8733743511  | -2.2261144547 |
| C1   | -1.1255300981 | 2.1104798051  | -1.1782361265 |
| C2   | -0.9102745047 | 2.6861819198  | 1.5058676311  |
| C3   | -0.9124290353 | 1.0797978327  | -0.2792332898 |
| C4   | -1.2290724083 | 3.4233116265  | -0.7560092991 |
| C5   | -1.1177208234 | 3.7040865538  | 0.5923576427  |
| C6   | -0.8114719283 | 1.3678030438  | 1.0820173903  |
| C7   | -0.8087391363 | -0.3562102400 | -0.7524663245 |
| H3   | -1.3878114642 | 4.2124612461  | -1.4677803341 |
| H4   | -1.1949163520 | 4.7159753806  | 0.9476472234  |
| H6   | -0.8255493611 | 2.9305472908  | 2.5475908580  |
| C16  | 0.6022837697  | -0.7535370452 | -1.1899191655 |
| C8   | -1.4336406315 | -1.2526033232 | 0.3369945726  |
| N2   | -0.5637103671 | 0.3334073534  | 2.0136689184  |

|     |               |               |               |
|-----|---------------|---------------|---------------|
| C9  | -0.7956297423 | -0.9929152113 | 1.6879762432  |
| C10 | 0.0929368152  | 0.6482781831  | 3.2594973960  |
| O1  | -0.5513110194 | -1.8861532885 | 2.4529140673  |
| C23 | -1.4259922500 | -2.7395719352 | 0.0103902564  |
| C18 | 3.1485043573  | -1.5525131582 | -2.0444469350 |
| C19 | 0.7684953091  | -1.4745126474 | -2.3656648746 |
| C20 | 1.7376698281  | -0.4324003000 | -0.4518502747 |
| C21 | 2.9961970451  | -0.8302669410 | -0.8734338778 |
| C22 | 2.0288677439  | -1.8729032033 | -2.7902732400 |
| H2  | -0.0926968795 | -1.7320301703 | -2.9597843583 |
| H5  | 1.6454268493  | 0.1352949207  | 0.4522972211  |
| H7  | 3.8591953660  | -0.5660731327 | -0.2873300396 |
| H8  | 2.1295850597  | -2.4348298867 | -3.7025797246 |
| H9  | 4.1281974348  | -1.8578003269 | -2.3708233964 |
| H10 | -1.4477477314 | -0.4525353223 | -1.6280288760 |
| H19 | -0.4164574236 | -3.1435765529 | -0.0080078994 |
| H20 | -1.8716697775 | -2.9041636420 | -0.9654909832 |
| H21 | -1.9855606783 | -3.2892627045 | 0.7604786725  |
| H22 | -2.4620713976 | -0.9158141412 | 0.4385032208  |
| H11 | 1.0432823483  | 1.1389733622  | 3.0782337589  |
| H12 | 0.2588851987  | -0.2845517033 | 3.7747974161  |
| H13 | -0.5467107744 | 1.2846166991  | 3.8611557632  |

nuclear repulsion energy..... 1417.469783671 hartrees

-----  
 / end of geometry optimization iteration 6 /  
 -----

end of program geopt

start of program onee  
 smallest eigenvalue of S: 3.293E-04  
 number of canonical orbitals..... 368  
 end of program onee

start of program probe  
 end of program probe

start of program grid

number of gridpoints:

| atom     | H1  | C1  | C2  | C3  | C4  | C5  | C6  |
|----------|-----|-----|-----|-----|-----|-----|-----|
| C7       |     |     |     |     |     |     |     |
| grid # 1 | 72  | 87  | 89  | 90  | 89  | 87  | 84  |
| 82       |     |     |     |     |     |     |     |
| grid # 2 | 116 | 97  | 96  | 98  | 97  | 97  | 94  |
| 90       |     |     |     |     |     |     |     |
| grid # 3 | 217 | 182 | 183 | 195 | 183 | 183 | 188 |
| 176      |     |     |     |     |     |     |     |

grid # 4      216      326      327      338      328      328      325  
313

number of gridpoints:

| atom     | H3  | H4  | H6  | C16 | C8  | N2  | C9  |
|----------|-----|-----|-----|-----|-----|-----|-----|
| C10      |     |     |     |     |     |     |     |
| grid # 1 | 73  | 73  | 71  | 92  | 82  | 96  | 82  |
| 68       |     |     |     |     |     |     |     |
| grid # 2 | 118 | 118 | 109 | 100 | 90  | 107 | 91  |
| 78       |     |     |     |     |     |     |     |
| grid # 3 | 224 | 223 | 207 | 194 | 176 | 210 | 176 |
| 147      |     |     |     |     |     |     |     |
| grid # 4 | 224 | 223 | 206 | 341 | 310 | 391 | 294 |
| 275      |     |     |     |     |     |     |     |

number of gridpoints:

| atom     | O1  | C23 | C18 | C19 | C20 | C21 | C22 |
|----------|-----|-----|-----|-----|-----|-----|-----|
| H2       |     |     |     |     |     |     |     |
| grid # 1 | 111 | 74  | 89  | 88  | 88  | 89  | 89  |
| 71       |     |     |     |     |     |     |     |
| grid # 2 | 122 | 80  | 97  | 95  | 96  | 97  | 96  |
| 112      |     |     |     |     |     |     |     |
| grid # 3 | 256 | 145 | 183 | 182 | 182 | 183 | 183 |
| 212      |     |     |     |     |     |     |     |
| grid # 4 | 448 | 287 | 327 | 326 | 327 | 327 | 327 |
| 211      |     |     |     |     |     |     |     |

number of gridpoints:

| atom     | H5  | H7  | H8  | H9  | H10 | H19 | H20 |
|----------|-----|-----|-----|-----|-----|-----|-----|
| H21      |     |     |     |     |     |     |     |
| grid # 1 | 70  | 73  | 73  | 73  | 66  | 70  | 72  |
| 70       |     |     |     |     |     |     |     |
| grid # 2 | 111 | 118 | 118 | 118 | 104 | 110 | 108 |
| 108      |     |     |     |     |     |     |     |
| grid # 3 | 209 | 222 | 223 | 224 | 203 | 217 | 216 |
| 217      |     |     |     |     |     |     |     |
| grid # 4 | 205 | 223 | 223 | 224 | 201 | 213 | 215 |
| 218      |     |     |     |     |     |     |     |

number of gridpoints:

| atom     | H22 | H11 | H12 | H13 | total |
|----------|-----|-----|-----|-----|-------|
| grid # 1 | 69  | 72  | 71  | 70  | 2865  |
| grid # 2 | 110 | 110 | 107 | 109 | 3722  |
| grid # 3 | 215 | 216 | 213 | 212 | 7177  |
| grid # 4 | 212 | 217 | 208 | 212 | 9916  |

end of program grid

start of program rwr  
recomputing RWR matrix 14      grid: 4  
end of program rwr

start of program scf

|      | i | u | d | i | g |                   | RMS     | maximum |
|------|---|---|---|---|---|-------------------|---------|---------|
|      | t | p | i | c | r |                   | energy  | DIIS    |
|      | e | d | i | u | i | total energy      | density | error   |
|      | r | t | s | t | d |                   | change  |         |
| etot | 1 | N | N | 2 | U | -783.01014976503  | 3.3E-04 | 1.0E-02 |
| etot | 2 | Y | Y | 6 | M | -783.02926272450  | 1.9E-02 | 4.0E-03 |
| etot | 3 | N | Y | 2 | U | -783.031506888944 | 2.2E-03 | 1.1E-03 |
| etot | 4 | Y | Y | 6 | M | -783.03163588170  | 1.3E-04 | 4.4E-04 |
| etot | 5 | Y | Y | 6 | M | -783.03166035585  | 2.4E-05 | 1.6E-04 |
| etot | 6 | Y | Y | 6 | M | -783.03166072795  | 3.7E-07 | 6.1E-05 |
| etot | 7 | Y | N | 6 | M | -783.03166208404  | 1.4E-06 | 0.0E+00 |

Energy components, in hartrees:

|     |                               |                   |       |
|-----|-------------------------------|-------------------|-------|
| (A) | Nuclear repulsion.....        | 1417.46978367085  |       |
| (E) | Total one-electron terms..... | -3879.48178181008 |       |
| (I) | Total two-electron terms..... | 1678.98033605519  |       |
| (L) | Electronic energy.....        | -2200.50144575489 | (E+I) |
| (N) | Total energy.....             | -783.03166208404  | (A+L) |

SCFE: SCF energy: HF -783.03166208404 hartrees iterations:  
7

HOMO energy: -0.30282  
LUMO energy: 0.12920

Orbital energies:

|           |           |           |           |           |           |
|-----------|-----------|-----------|-----------|-----------|-----------|
| -20.52833 | -15.59891 | -11.34756 | -11.28416 | -11.25541 | -11.25028 |
| -11.24282 | -11.24110 | -11.24097 | -11.23778 | -11.23734 | -11.23401 |
| -11.23182 | -11.23107 | -11.23022 | -11.22982 | -11.22896 | -11.22833 |
| -11.20996 | -1.39587  | -1.26968  | -1.16613  | -1.14985  | -1.10741  |
| -1.03087  | -1.01910  | -1.01872  | -1.01296  | -0.96182  | -0.93266  |
| -0.85779  | -0.83758  | -0.83380  | -0.82208  | -0.79653  | -0.74064  |
| -0.71223  | -0.69518  | -0.67394  | -0.66491  | -0.64360  | -0.63948  |
| -0.62761  | -0.61484  | -0.61282  | -0.60999  | -0.59844  | -0.58336  |
| -0.57719  | -0.55308  | -0.54718  | -0.53906  | -0.53177  | -0.51842  |
| -0.51574  | -0.50780  | -0.50089  | -0.49848  | -0.48554  | -0.46816  |
| -0.46376  | -0.42210  | -0.41006  | -0.34286  | -0.33312  | -0.32377  |
| -0.30282  | 0.12920   | 0.13420   | 0.14331   | 0.15250   | 0.20197   |
| 0.22872   | 0.24015   | 0.24285   | 0.26249   | 0.28403   |           |

end of program scf

start of program derla  
end of program derla

start of program rwr  
recomputing RwR matrix 14 grid: 4  
end of program rwr

start of program der1b

forces (hartrees/bohr) : total

| atom  | label | x             | y             | z             |
|-------|-------|---------------|---------------|---------------|
| 1     | H1    | 5.082966E-05  | 4.147403E-04  | 2.390451E-04  |
| 2     | C1    | -2.524073E-04 | -2.990812E-04 | -3.991328E-04 |
| 3     | C2    | -5.991792E-05 | 2.355079E-03  | 2.679523E-03  |
| 4     | C3    | -2.392454E-04 | -1.776242E-03 | -1.464150E-03 |
| 5     | C4    | 7.761207E-05  | 1.771058E-03  | -1.012603E-03 |
| 6     | C5    | -2.711701E-04 | 7.174789E-04  | 6.043006E-04  |
| 7     | C6    | 2.246728E-03  | -4.134496E-04 | 1.492497E-04  |
| 8     | C7    | -1.798624E-03 | 2.172768E-03  | -1.998846E-03 |
| 9     | H3    | -2.883140E-04 | 3.614995E-04  | -4.275217E-04 |
| 10    | H4    | 2.857580E-05  | 6.108377E-04  | -4.015449E-04 |
| 11    | H6    | -4.417723E-04 | 8.065909E-05  | -9.309747E-04 |
| 12    | C16   | -2.435824E-03 | -1.149247E-03 | 5.727584E-04  |
| 13    | C8    | 5.293563E-03  | 7.802561E-04  | -9.210096E-04 |
| 14    | N2    | -2.519041E-03 | -1.011425E-02 | -1.662046E-02 |
| 15    | C9    | 6.589599E-04  | 2.388519E-03  | 1.049986E-02  |
| 16    | C10   | -2.902421E-03 | -4.428730E-03 | 6.574448E-03  |
| 17    | O1    | 8.097711E-04  | 5.789901E-03  | -2.604982E-03 |
| 18    | C23   | 1.800907E-03  | -3.873625E-03 | 1.666163E-03  |
| 19    | C18   | 9.814273E-04  | -6.533904E-04 | -7.102130E-04 |
| 20    | C19   | 1.862769E-03  | -1.230075E-03 | -1.876152E-03 |
| 21    | C20   | 7.734895E-04  | -8.375331E-04 | -9.570674E-04 |
| 22    | C21   | -5.025218E-04 | 2.040601E-03  | 2.014484E-03  |
| 23    | C22   | -2.354383E-03 | -7.166479E-04 | -1.206419E-03 |
| 24    | H2    | 4.437174E-04  | 1.868475E-04  | 3.441638E-04  |
| 25    | H5    | 2.889637E-04  | 1.301402E-03  | 1.447727E-03  |
| 26    | H7    | -1.221190E-04 | -2.383464E-04 | 2.095295E-04  |
| 27    | H8    | -5.534103E-06 | 2.916568E-04  | -1.546134E-04 |
| 28    | H9    | -8.144565E-04 | 1.268940E-04  | 7.794458E-05  |
| 29    | H10   | 1.883791E-03  | -3.109749E-04 | 1.420457E-03  |
| 30    | H19   | -3.111543E-03 | 2.448036E-03  | 4.316898E-04  |
| 31    | H20   | -1.549001E-03 | -7.695155E-04 | 3.875000E-04  |
| 32    | H21   | 6.506813E-04  | 5.123084E-04  | -2.844080E-03 |
| 33    | H22   | -2.342860E-03 | 4.099760E-05  | -1.014200E-04 |
| 34    | H11   | -6.799325E-04 | 1.970137E-03  | 7.057778E-04  |
| 35    | H12   | 6.858655E-04  | 2.579776E-03  | 1.639957E-03  |
| 36    | H13   | 3.715259E-03  | -8.931149E-04 | 2.937944E-03  |
| total |       | -4.381795E-04 | 1.237225E-03  | -2.867465E-05 |

end of program derlb

start of program geopt 7

geometry optimization step 7

reading input hessian of dimension 108  
in five columns format  
reading input hessian of dimension 108  
in five columns format

Level shifts adjusted to satisfy step-size constraints

Step size: 0.3003895  
Cos(theta): 0.5186509

Final level shift: -8.0189587E-03

energy change: -6.3508E-04 . ( 5.0000E-05 )  
gradient maximum: 1.0660E-02 . ( 4.5000E-04 )  
gradient rms: 2.6430E-03 . ( 3.0000E-04 )  
step size: 0.30039 trust radius: 0.30000  
displacement maximum: 2.0077E-01 . ( 1.8000E-03 )  
displacement rms: 2.7196E-02 . ( 1.2000E-03 )  
predicted energy change: -2.6359E-03 geom step: 3.0039E-  
01 full step: 3.0039E-01  
molecular structure not yet converged...

center of mass moved by:

x: 3.7293E-02 y: 3.5921E-03 z: -1.8080E-02

new geometry:

|      | angstroms     |               |               |
|------|---------------|---------------|---------------|
| atom | x             | y             | z             |
| H1   | -1.2060637633 | 1.8844493579  | -2.2172973329 |
| C1   | -1.1162159815 | 2.1199748279  | -1.1710457399 |
| C2   | -0.8750562384 | 2.7005472519  | 1.5121309121  |
| C3   | -0.8924559745 | 1.0856524139  | -0.2759781118 |
| C4   | -1.2172852275 | 3.4382213400  | -0.7520106656 |
| C5   | -1.0953405798 | 3.7182673439  | 0.5969574083  |
| C6   | -0.7714985069 | 1.3761629880  | 1.0873596585  |
| C7   | -0.8039986814 | -0.3522858708 | -0.7474083092 |
| H3   | -1.3910485446 | 4.2238015270  | -1.4647088856 |
| H4   | -1.1760658928 | 4.7306083866  | 0.9492926346  |
| H6   | -0.8001976785 | 2.9559921480  | 2.5483428251  |
| C16  | 0.5935061370  | -0.7624401520 | -1.2124886027 |
| C8   | -1.3970841471 | -1.2544925767 | 0.3579215937  |
| N2   | -0.5302400873 | 0.3279037722  | 1.9981145627  |
| C9   | -0.7517363528 | -0.9839297206 | 1.7072076741  |
| C10  | -0.1028905110 | 0.6226102755  | 3.3793777505  |
| O1   | -0.4815390049 | -1.8602482796 | 2.4710728185  |
| C23  | -1.4069593418 | -2.7445057154 | 0.0351543085  |



|     |               |               |               |
|-----|---------------|---------------|---------------|
| C18 | 3.1164372369  | -1.5703257625 | -2.1047638215 |
| C19 | 0.7356291839  | -1.5213338707 | -2.3697245139 |
| C20 | 1.7450190202  | -0.4027161135 | -0.5167148879 |
| C21 | 2.9924975402  | -0.8080217649 | -0.9535065916 |
| C22 | 1.9823247445  | -1.9214191571 | -2.8168486051 |
| H2  | -0.1393117586 | -1.8030771280 | -2.9301047588 |
| H5  | 1.6740918410  | 0.2123410873  | 0.3617379721  |
| H7  | 3.8670569792  | -0.5263749433 | -0.3950571846 |
| H8  | 2.0647440841  | -2.5006478610 | -3.7202071737 |
| H9  | 4.0865798413  | -1.8814906020 | -2.4452556976 |
| H10 | -1.4542944640 | -0.4550500198 | -1.6047119739 |
| H19 | -0.4146435807 | -3.1003938955 | -0.1239894694 |
| H20 | -1.9948428207 | -2.9377698958 | -0.8553108722 |
| H21 | -1.8383085739 | -3.3040552640 | 0.8409012447  |
| H22 | -2.4265389290 | -0.9249000252 | 0.4740179438  |
| H11 | 0.8559945173  | 1.1410591180  | 3.3718041732  |
| H12 | -0.0060463007 | -0.3060975808 | 3.9061705905  |
| H13 | -0.8139734314 | 1.2359193215  | 3.9289086681  |

nuclear repulsion energy..... 1415.083079959 hartrees

-----  
 / end of geometry optimization iteration 7 /  
 -----

end of program geopt

start of program onee  
 smallest eigenvalue of S: 3.349E-04  
 number of canonical orbitals..... 368  
 end of program onee

start of program probe  
 end of program probe

start of program grid

number of gridpoints:

| atom     | H1  | C1  | C2  | C3  | C4  | C5  | C6  |
|----------|-----|-----|-----|-----|-----|-----|-----|
| C7       |     |     |     |     |     |     |     |
| grid # 1 | 72  | 87  | 87  | 89  | 89  | 87  | 85  |
| 82       |     |     |     |     |     |     |     |
| grid # 2 | 116 | 96  | 96  | 98  | 97  | 97  | 93  |
| 90       |     |     |     |     |     |     |     |
| grid # 3 | 217 | 182 | 184 | 195 | 183 | 184 | 192 |
| 175      |     |     |     |     |     |     |     |
| grid # 4 | 216 | 326 | 329 | 337 | 328 | 328 | 326 |
| 312      |     |     |     |     |     |     |     |

number of gridpoints:

| atom     | H3  | H4  | H6  | C16 | C8  | N2  | C9  |
|----------|-----|-----|-----|-----|-----|-----|-----|
| C10      |     |     |     |     |     |     |     |
| 70       |     |     |     |     |     |     |     |
| grid # 1 | 73  | 73  | 71  | 92  | 82  | 94  | 81  |
| 78       |     |     |     |     |     |     |     |
| grid # 2 | 118 | 118 | 110 | 100 | 91  | 104 | 92  |
| 147      |     |     |     |     |     |     |     |
| grid # 3 | 224 | 223 | 208 | 194 | 176 | 213 | 175 |
| 277      |     |     |     |     |     |     |     |
| grid # 4 | 224 | 223 | 207 | 342 | 311 | 392 | 296 |

number of gridpoints:

| atom     | O1  | C23 | C18 | C19 | C20 | C21 | C22 |
|----------|-----|-----|-----|-----|-----|-----|-----|
| H2       |     |     |     |     |     |     |     |
| 71       |     |     |     |     |     |     |     |
| grid # 1 | 111 | 72  | 89  | 88  | 88  | 89  | 89  |
| 112      |     |     |     |     |     |     |     |
| grid # 2 | 122 | 80  | 97  | 95  | 96  | 97  | 96  |
| 212      |     |     |     |     |     |     |     |
| grid # 3 | 255 | 149 | 183 | 183 | 182 | 184 | 183 |
| 212      |     |     |     |     |     |     |     |
| grid # 4 | 447 | 280 | 327 | 326 | 327 | 327 | 327 |

number of gridpoints:

| atom     | H5  | H7  | H8  | H9  | H10 | H19 | H20 |
|----------|-----|-----|-----|-----|-----|-----|-----|
| H21      |     |     |     |     |     |     |     |
| 70       |     |     |     |     |     |     |     |
| grid # 1 | 71  | 73  | 73  | 73  | 68  | 71  | 71  |
| 108      |     |     |     |     |     |     |     |
| grid # 2 | 111 | 118 | 118 | 118 | 107 | 108 | 109 |
| 217      |     |     |     |     |     |     |     |
| grid # 3 | 211 | 223 | 223 | 224 | 202 | 215 | 217 |
| 216      |     |     |     |     |     |     |     |
| grid # 4 | 206 | 223 | 223 | 224 | 196 | 211 | 218 |

number of gridpoints:

| atom     | H22 | H11 | H12 | H13 | total |
|----------|-----|-----|-----|-----|-------|
| grid # 1 | 69  | 71  | 71  | 71  | 2863  |
| grid # 2 | 110 | 111 | 105 | 107 | 3719  |
| grid # 3 | 215 | 217 | 212 | 214 | 7193  |
| grid # 4 | 210 | 222 | 205 | 218 | 9919  |

end of program grid

start of program rwr

end of program rwr

start of program scf

i u d i g

|      | t | p | i | c | r |                  | RMS     | maximum |         |
|------|---|---|---|---|---|------------------|---------|---------|---------|
|      | e | d | i | u | i | energy           | density | DIIS    |         |
|      | r | t | s | t | d | total energy     | change  | error   |         |
| etot | 1 | N | N | 2 | U | -783.00572045925 |         | 3.5E-04 | 1.5E-02 |
| etot | 2 | Y | Y | 6 | M | -783.02816665484 | 2.2E-02 | 1.6E-04 | 4.2E-03 |
| etot | 3 | N | Y | 2 | U | -783.03070115906 | 2.5E-03 | 4.5E-05 | 7.8E-04 |
| etot | 4 | Y | Y | 6 | M | -783.03081424750 | 1.1E-04 | 2.0E-05 | 3.6E-04 |
| etot | 5 | Y | Y | 6 | M | -783.03083834411 | 2.4E-05 | 5.6E-06 | 1.2E-04 |
| etot | 6 | Y | Y | 6 | M | -783.03084494480 | 6.6E-06 | 2.6E-06 | 5.6E-05 |
| etot | 7 | Y | N | 6 | M | -783.03084513822 | 1.9E-07 | 0.0E+00 | 0.0E+00 |

Energy components, in hartrees:

|     |                               |                   |       |
|-----|-------------------------------|-------------------|-------|
| (A) | Nuclear repulsion.....        | 1415.08307995899  |       |
| (E) | Total one-electron terms..... | -3874.74976358586 |       |
| (I) | Total two-electron terms..... | 1676.63583848865  |       |
| (L) | Electronic energy.....        | -2198.11392509721 | (E+I) |
| (N) | Total energy.....             | -783.03084513822  | (A+L) |

SCFE: SCF energy: HF -783.03084513822 hartrees iterations:  
7

HOMO energy: -0.30150  
LUMO energy: 0.12931

Orbital energies:

|           |           |           |           |           |           |
|-----------|-----------|-----------|-----------|-----------|-----------|
| -20.52623 | -15.60196 | -11.34425 | -11.28806 | -11.25773 | -11.24924 |
| -11.24162 | -11.24070 | -11.23969 | -11.23864 | -11.23801 | -11.23524 |
| -11.23042 | -11.23002 | -11.22950 | -11.22874 | -11.22771 | -11.22676 |
| -11.20467 | -1.40154  | -1.26972  | -1.16455  | -1.14832  | -1.10546  |
| -1.03009  | -1.01848  | -1.01701  | -1.01269  | -0.96167  | -0.93376  |
| -0.85901  | -0.84075  | -0.83279  | -0.82104  | -0.79613  | -0.74203  |
| -0.71118  | -0.69452  | -0.67376  | -0.66400  | -0.64413  | -0.63721  |
| -0.62740  | -0.61423  | -0.61191  | -0.60811  | -0.59521  | -0.58350  |
| -0.57605  | -0.55229  | -0.54975  | -0.54154  | -0.53339  | -0.51841  |
| -0.51440  | -0.50726  | -0.50082  | -0.49703  | -0.48429  | -0.46907  |
| -0.46212  | -0.42392  | -0.41099  | -0.34214  | -0.33278  | -0.32190  |
| -0.30150  | 0.12931   | 0.13453   | 0.14496   | 0.15196   | 0.20661   |
| 0.23155   | 0.24129   | 0.24929   | 0.26183   | 0.28792   |           |

end of program scf

start of program derla  
end of program derla

start of program rwr  
end of program rwr

start of program der1b

forces (hartrees/bohr) : total

| atom  | label | x             | y             | z             |
|-------|-------|---------------|---------------|---------------|
| 1     | H1    | -1.345234E-04 | -1.287784E-04 | -4.775301E-04 |
| 2     | C1    | 2.789039E-04  | 9.842413E-04  | 7.887341E-04  |
| 3     | C2    | -4.454131E-04 | -1.500603E-03 | -1.869518E-03 |
| 4     | C3    | 1.336679E-05  | 2.075056E-03  | 4.323622E-04  |
| 5     | C4    | 2.872991E-04  | -2.631794E-03 | 7.206142E-04  |
| 6     | C5    | 2.363437E-04  | -1.740103E-03 | -1.125056E-03 |
| 7     | C6    | -2.338580E-03 | 1.869163E-03  | -3.262312E-03 |
| 8     | C7    | 2.514015E-03  | -1.379252E-03 | 1.611937E-03  |
| 9     | H3    | 9.566931E-05  | 1.625675E-04  | -7.817488E-05 |
| 10    | H4    | 5.338242E-05  | 5.588807E-04  | 4.099372E-04  |
| 11    | H6    | 1.083146E-03  | -1.064019E-03 | 2.175652E-03  |
| 12    | C16   | 3.847128E-04  | 1.349993E-03  | 3.891506E-04  |
| 13    | C8    | -1.239438E-03 | -1.185052E-03 | -7.314713E-04 |
| 14    | N2    | 2.132938E-03  | 1.213271E-02  | 2.634140E-02  |
| 15    | C9    | -2.391581E-03 | -2.574927E-03 | -1.649513E-02 |
| 16    | C10   | 3.852591E-03  | 7.134513E-03  | -5.669553E-03 |
| 17    | O1    | -6.082847E-05 | -8.808798E-03 | 6.847289E-03  |
| 18    | C23   | -6.031663E-03 | 6.963073E-03  | -2.644129E-03 |
| 19    | C18   | 4.804597E-04  | -4.972846E-05 | -5.994728E-05 |
| 20    | C19   | -2.895783E-03 | 9.203431E-04  | 7.784932E-04  |
| 21    | C20   | -2.011694E-03 | 1.323757E-03  | 5.652296E-04  |
| 22    | C21   | 7.449429E-04  | -1.349202E-03 | -1.237316E-03 |
| 23    | C22   | 1.919302E-03  | -1.397776E-04 | -1.477727E-04 |
| 24    | H2    | -4.006863E-04 | 1.259212E-04  | -1.176327E-04 |
| 25    | H5    | -1.628250E-04 | -8.441868E-04 | 1.083419E-04  |
| 26    | H7    | 6.662561E-04  | 3.013372E-04  | -8.538325E-05 |
| 27    | H8    | 2.557648E-04  | -2.100563E-04 | 3.790917E-04  |
| 28    | H9    | 1.210621E-03  | -2.590803E-04 | -4.148695E-04 |
| 29    | H10   | -2.076596E-03 | -6.321162E-05 | -2.071245E-03 |
| 30    | H19   | 1.066426E-02  | -5.735758E-03 | -1.786585E-03 |
| 31    | H20   | 2.561933E-04  | 1.331208E-03  | -2.289656E-03 |
| 32    | H21   | -2.611967E-03 | -2.890473E-03 | 6.415145E-03  |
| 33    | H22   | -2.481258E-03 | 1.099190E-03  | 9.964031E-04  |
| 34    | H11   | -3.261198E-03 | -1.761278E-03 | -4.250366E-04 |
| 35    | H12   | 2.359964E-03  | -2.376032E-03 | -1.358300E-03 |
| 36    | H13   | -1.865198E-03 | -8.414605E-04 | -6.861972E-03 |
| total |       | -9.190946E-04 | 7.983831E-04  | -2.488093E-04 |

end of program der1b

start of program geopt 8

geometry optimization step 8

reading input hessian of dimension 108  
in five columns format  
reading input hessian of dimension 108  
in five columns format

Level shifts adjusted to satisfy step-size constraints  
Step size: 0.3000105  
Cos(theta): 0.6019445

Final level shift: -3.4583305E-02

energy change: 8.1695E-04 . ( 5.0000E-05 )  
gradient maximum: 1.7826E-02 . ( 4.5000E-04 )  
gradient rms: 3.8954E-03 . ( 3.0000E-04 )  
step size: 0.30001 trust radius: 0.30000  
displacement maximum: 1.5218E-01 . ( 1.8000E-03 )  
displacement rms: 2.7162E-02 . ( 1.2000E-03 )  
predicted energy change: -5.4413E-03 geom step: 3.0001E-01  
01 full step: 3.0001E-01  
molecular structure not yet converged...

center of mass moved by:  
x: -3.4466E-02 y: -5.9815E-03 z: 1.7508E-02

new geometry:

|      | angstroms     |               |               |
|------|---------------|---------------|---------------|
| atom | x             | y             | z             |
| H1   | -1.2046544007 | 1.8783275428  | -2.2228604213 |
| C1   | -1.1243695996 | 2.1127377444  | -1.1747909746 |
| C2   | -0.8964629456 | 2.6844650961  | 1.5101826733  |
| C3   | -0.9142935064 | 1.0798661829  | -0.2774911322 |
| C4   | -1.2201716188 | 3.4250106923  | -0.7518060154 |
| C5   | -1.1010717672 | 3.7037057576  | 0.5969715524  |
| C6   | -0.8090470103 | 1.3663334697  | 1.0845569784  |
| C7   | -0.8099732815 | -0.3560479331 | -0.7529817026 |
| H3   | -1.3793438780 | 4.2157761767  | -1.4624649722 |
| H4   | -1.1701965204 | 4.7171074317  | 0.9513827764  |
| H6   | -0.8058809644 | 2.9242078411  | 2.5522679888  |
| C16  | 0.5982578365  | -0.7525453092 | -1.1967210184 |
| C8   | -1.4304494145 | -1.2560574070 | 0.3369748268  |
| N2   | -0.5503505571 | 0.3300890385  | 2.0187476874  |
| C9   | -0.7917989037 | -0.9974430376 | 1.6910903953  |
| C10  | 0.0658971114  | 0.6636049639  | 3.2785163802  |
| O1   | -0.5615427370 | -1.8898753909 | 2.4619783932  |
| C23  | -1.4240370128 | -2.7482515775 | 0.0129995912  |
| C18  | 3.1472190383  | -1.5512187283 | -2.0578023781 |
| C19  | 0.7625109496  | -1.4777047321 | -2.3712785576 |
| C20  | 1.7358677836  | -0.4279934029 | -0.4650571640 |
| C21  | 2.9952612075  | -0.8250544434 | -0.8900522524 |
| C22  | 2.0242078050  | -1.8760779298 | -2.7991041086 |
| H2   | -0.1007956422 | -1.7347833321 | -2.9631965287 |

|     |               |               |               |
|-----|---------------|---------------|---------------|
| H5  | 1.6497417316  | 0.1399239247  | 0.4399363337  |
| H7  | 3.8604520927  | -0.5581662244 | -0.3078243962 |
| H8  | 2.1237606030  | -2.4388267225 | -3.7090496169 |
| H9  | 4.1271700966  | -1.8547407860 | -2.3849372462 |
| H10 | -1.4505018669 | -0.4546740579 | -1.6268754035 |
| H19 | -0.4086254961 | -3.1617404324 | -0.0113461399 |
| H20 | -1.8708786231 | -2.9072278620 | -0.9639818605 |
| H21 | -1.9910798153 | -3.2980126072 | 0.7652698506  |
| H22 | -2.4651524546 | -0.9182164199 | 0.4429340545  |
| H11 | 0.9785511247  | 1.2228720066  | 3.1067170873  |
| H12 | 0.3051799025  | -0.2577449189 | 3.7832726892  |
| H13 | -0.6265580817 | 1.2442585545  | 3.8716199658  |

nuclear repulsion energy..... 1416.059050702 hartrees

-----  
 / end of geometry optimization iteration 8 /  
 -----

end of program geopt

start of program onee  
 smallest eigenvalue of S: 3.308E-04  
 number of canonical orbitals..... 368  
 end of program onee

start of program probe  
 end of program probe

start of program grid

number of gridpoints:

| atom     | H1  | C1  | C2  | C3  | C4  | C5  | C6  |
|----------|-----|-----|-----|-----|-----|-----|-----|
| C7       |     |     |     |     |     |     |     |
| grid # 1 | 72  | 87  | 89  | 90  | 89  | 87  | 84  |
| 81       |     |     |     |     |     |     |     |
| grid # 2 | 116 | 96  | 96  | 98  | 97  | 97  | 94  |
| 91       |     |     |     |     |     |     |     |
| grid # 3 | 216 | 182 | 184 | 195 | 184 | 184 | 187 |
| 176      |     |     |     |     |     |     |     |
| grid # 4 | 216 | 326 | 327 | 338 | 328 | 328 | 324 |
| 312      |     |     |     |     |     |     |     |

number of gridpoints:

| atom     | H3  | H4  | H6  | C16 | C8 | N2  | C9 |
|----------|-----|-----|-----|-----|----|-----|----|
| C10      |     |     |     |     |    |     |    |
| grid # 1 | 73  | 73  | 70  | 92  | 82 | 97  | 82 |
| 68       |     |     |     |     |    |     |    |
| grid # 2 | 118 | 118 | 109 | 100 | 90 | 105 | 91 |
| 78       |     |     |     |     |    |     |    |

```

  grid # 3      224    223    207    196    173    213    176
146
  grid # 4      224    223    206    341    312    391    295
273

```

```

  number of gridpoints:
  atom          O1    C23    C18    C19    C20    C21    C22
H2
  grid # 1      111     74     89     88     87     89     89
71
  grid # 2      123     81     97     95     96     97     96
112
  grid # 3      256    147    183    182    182    183    183
212
  grid # 4      450    287    327    326    327    327    327
211

```

```

  number of gridpoints:
  atom          H5     H7     H8     H9     H10    H19    H20
H21
  grid # 1       70     73     73     73     66     70     72
70
  grid # 2      111    118    118    118    106    110    108
109
  grid # 3      210    222    223    223    203    217    216
217
  grid # 4      205    223    224    224    201    218    215
221

```

```

  number of gridpoints:
  atom          H22    H11    H12    H13  total
  grid # 1       69     71     70     70  2861
  grid # 2      111    108    108    108  3724
  grid # 3      215    215    213    212  7180
  grid # 4      213    212    210    210  9922

```

end of program grid

start of program rwr  
end of program rwr

start of program scf

|      | i | u | d | i | g |                  |         | RMS     | maximum |
|------|---|---|---|---|---|------------------|---------|---------|---------|
|      | t | p | i | c | r |                  |         | energy  | DIIS    |
|      | e | d | i | u | i |                  |         | change  | error   |
|      | r | t | s | t | d | total energy     |         | change  |         |
| etot | 1 | N | N | 2 | U | -783.00842820834 |         | 3.3E-04 | 1.1E-02 |
| etot | 2 | Y | Y | 6 | M | -783.02900799999 | 2.1E-02 | 1.5E-04 | 3.2E-03 |

|      |   |   |   |   |   |                  |          |         |         |
|------|---|---|---|---|---|------------------|----------|---------|---------|
| etot | 3 | N | Y | 2 | U | -783.03123948088 | 2.2E-03  | 4.1E-05 | 7.4E-04 |
| etot | 4 | Y | Y | 6 | M | -783.03136999434 | 1.3E-04  | 1.9E-05 | 2.9E-04 |
| etot | 5 | Y | Y | 6 | M | -783.03138474704 | 1.5E-05  | 5.1E-06 | 1.1E-04 |
| etot | 6 | Y | Y | 6 | M | -783.03138431173 | -4.4E-07 | 2.3E-06 | 4.9E-05 |
| etot | 7 | Y | N | 6 | M | -783.03138353949 | -7.7E-07 | 0.0E+00 | 0.0E+00 |

Energy components, in hartrees:

|     |                               |                   |       |
|-----|-------------------------------|-------------------|-------|
| (A) | Nuclear repulsion.....        | 1416.05905070195  |       |
| (E) | Total one-electron terms..... | -3876.68109013092 |       |
| (I) | Total two-electron terms..... | 1677.59065588948  |       |
| (L) | Electronic energy.....        | -2199.09043424144 | (E+I) |
| (N) | Total energy.....             | -783.03138353949  | (A+L) |

SCFE: SCF energy: HF -783.03138353949 hartrees iterations:  
7

HOMO energy: -0.30265  
LUMO energy: 0.12931

Orbital energies:

|           |           |           |           |           |           |
|-----------|-----------|-----------|-----------|-----------|-----------|
| -20.52812 | -15.59889 | -11.34801 | -11.28462 | -11.25559 | -11.25054 |
| -11.24470 | -11.24133 | -11.24111 | -11.23810 | -11.23742 | -11.23403 |
| -11.23203 | -11.23096 | -11.23057 | -11.22984 | -11.22896 | -11.22818 |
| -11.21238 | -1.39469  | -1.26819  | -1.16578  | -1.14959  | -1.10662  |
| -1.02988  | -1.01907  | -1.01861  | -1.01219  | -0.96231  | -0.93196  |
| -0.85694  | -0.83668  | -0.83365  | -0.82194  | -0.79616  | -0.73977  |
| -0.71129  | -0.69513  | -0.67323  | -0.66430  | -0.64348  | -0.63932  |
| -0.62745  | -0.61467  | -0.61323  | -0.60922  | -0.59878  | -0.58280  |
| -0.57710  | -0.55327  | -0.54673  | -0.53941  | -0.53154  | -0.51776  |
| -0.51547  | -0.50711  | -0.50066  | -0.49824  | -0.48522  | -0.46812  |
| -0.46355  | -0.42096  | -0.41046  | -0.34293  | -0.33254  | -0.32392  |
| -0.30265  | 0.12931   | 0.13426   | 0.14323   | 0.15242   | 0.20170   |
| 0.22876   | 0.24024   | 0.24366   | 0.26202   | 0.28422   |           |

end of program scf

start of program derla  
end of program derla

start of program rwr  
end of program rwr

start of program der1b

forces (hartrees/bohr) : total

|      |       |   |   |   |
|------|-------|---|---|---|
| atom | label | x | y | z |
|------|-------|---|---|---|



|       |     |               |               |               |
|-------|-----|---------------|---------------|---------------|
| 1     | H1  | 6.754269E-05  | 1.484976E-04  | 1.625033E-04  |
| 2     | C1  | -4.297930E-04 | -1.214185E-03 | -6.459060E-04 |
| 3     | C2  | -6.436097E-04 | 2.488579E-03  | 2.043006E-03  |
| 4     | C3  | 5.384116E-05  | -2.382377E-03 | -9.098488E-04 |
| 5     | C4  | 2.949671E-05  | 2.639026E-03  | 6.296979E-05  |
| 6     | C5  | -6.020940E-04 | 1.542792E-03  | 3.559638E-04  |
| 7     | C6  | 4.443763E-03  | -3.025602E-03 | 2.277508E-03  |
| 8     | C7  | -2.623202E-03 | 1.241934E-03  | -2.062676E-03 |
| 9     | H3  | -7.535924E-05 | 1.106751E-04  | -1.083848E-04 |
| 10    | H4  | 3.564563E-05  | 1.608811E-04  | -3.196634E-04 |
| 11    | H6  | -4.600136E-04 | 7.003288E-04  | -1.065761E-03 |
| 12    | C16 | -1.329877E-03 | -1.575709E-03 | 2.918836E-04  |
| 13    | C8  | 3.231682E-03  | 5.320824E-04  | 1.130432E-03  |
| 14    | N2  | -5.739442E-03 | -1.037996E-02 | -2.368114E-02 |
| 15    | C9  | 6.253407E-04  | 3.849334E-03  | 1.336909E-02  |
| 16    | C10 | -3.214380E-06 | -5.337077E-03 | 3.019446E-03  |
| 17    | O1  | 9.943650E-04  | 6.770482E-03  | -3.665438E-03 |
| 18    | C23 | 4.346059E-03  | -5.029903E-03 | 2.386789E-03  |
| 19    | C18 | -6.780674E-04 | -7.293570E-04 | -1.277954E-03 |
| 20    | C19 | 3.303251E-03  | -1.180330E-03 | -2.227864E-03 |
| 21    | C20 | 2.902467E-03  | -1.012561E-03 | -4.530768E-04 |
| 22    | C21 | -1.043674E-03 | 2.360615E-03  | 2.716621E-03  |
| 23    | C22 | -3.415880E-03 | 6.355409E-04  | 6.712632E-04  |
| 24    | H2  | 7.986165E-04  | -6.321815E-05 | 4.191238E-04  |
| 25    | H5  | -1.373954E-04 | 1.328309E-03  | 1.140928E-03  |
| 26    | H7  | -4.933481E-04 | -9.530353E-05 | 3.111275E-04  |
| 27    | H8  | -1.301729E-04 | -4.145972E-04 | -1.215579E-03 |
| 28    | H9  | -9.299230E-04 | 1.085227E-05  | -1.021287E-04 |
| 29    | H10 | 1.474780E-03  | 5.719194E-05  | 1.336150E-03  |
| 30    | H19 | -8.745452E-03 | 5.231834E-03  | 1.271904E-03  |
| 31    | H20 | -1.490535E-03 | -1.184151E-03 | 8.172839E-04  |
| 32    | H21 | 3.097514E-03  | 2.459154E-03  | -5.330651E-03 |
| 33    | H22 | 1.894296E-03  | -1.603354E-03 | -5.055083E-04 |
| 34    | H11 | -6.101446E-04 | 2.528858E-03  | 1.660908E-03  |
| 35    | H12 | -1.149873E-03 | 1.027478E-03  | 1.774567E-03  |
| 36    | H13 | 2.901508E-03  | 5.304608E-04  | 6.026358E-03  |
| total |     | -5.309006E-04 | 1.127220E-03  | -3.257527E-04 |

end of program der1b

start of program geopt 9

geometry optimization step 9

reading input hessian of dimension 108  
in five columns format

reading input hessian of dimension 108  
in five columns format

Level shifts adjusted to satisfy step-size constraints

Step size: 0.3000251

Cos(theta): 0.5877516

Final level shift: -1.6600358E-02

energy change: -5.3840E-04 . ( 5.0000E-05 )

gradient maximum: 1.6089E-02 . ( 4.5000E-04 )

gradient rms: 3.5564E-03 . ( 3.0000E-04 )

step size: 0.30002 trust radius: 0.30000

displacement maximum: 1.6821E-01 . ( 1.8000E-03 )

displacement rms: 2.7163E-02 . ( 1.2000E-03 )

predicted energy change: -4.2106E-03 geom step: 3.0002E-

01 full step: 3.0002E-01

molecular structure not yet converged...

center of mass moved by:

x: 3.3972E-02 y: 7.2210E-03 z: -1.7067E-02

new geometry:

|      | angstroms     |               |               |
|------|---------------|---------------|---------------|
| atom | x             | y             | z             |
| H1   | -1.1959850689 | 1.8795569850  | -2.2163864898 |
| C1   | -1.1058669005 | 2.1165747112  | -1.1701107483 |
| C2   | -0.8629608188 | 2.7026453295  | 1.5109337136  |
| C3   | -0.8880331061 | 1.0823927154  | -0.2739293177 |
| C4   | -1.1996358749 | 3.4370094468  | -0.7526780514 |
| C5   | -1.0771853730 | 3.7204439472  | 0.5945444137  |
| C6   | -0.7666563274 | 1.3761729362  | 1.0877031786  |
| C7   | -0.8040118379 | -0.3559018865 | -0.7432415345 |
| H3   | -1.3669527525 | 4.2218421616  | -1.4673583848 |
| H4   | -1.1506622511 | 4.7339120586  | 0.9452669176  |
| H6   | -0.7842105134 | 2.9578197917  | 2.5478949008  |
| C16  | 0.5916610455  | -0.7644552035 | -1.2164015847 |
| C8   | -1.3857221944 | -1.2605938980 | 0.3648262832  |
| N2   | -0.5375433964 | 0.3345655612  | 2.0010423720  |
| C9   | -0.7550822887 | -0.9790135830 | 1.7173290553  |
| C10  | -0.1397548261 | 0.6385257597  | 3.3883422090  |
| O1   | -0.4959221837 | -1.8504114624 | 2.4923108672  |
| C23  | -1.3743288698 | -2.7469563729 | 0.0408887661  |
| C18  | 3.1027208973  | -1.5786553471 | -2.1238429505 |
| C19  | 0.7249206683  | -1.5102659123 | -2.3823009527 |
| C20  | 1.7472145942  | -0.4174307585 | -0.5180046152 |
| C21  | 2.9894349876  | -0.8270758521 | -0.9623860172 |
| C22  | 1.9655602266  | -1.9125728494 | -2.8376989177 |
| H2   | -0.1532918518 | -1.7823533997 | -2.9410759245 |
| H5   | 1.6783588193  | 0.1904690514  | 0.3667184589  |
| H7   | 3.8674203198  | -0.5581005888 | -0.4029168141 |
| H8   | 2.0415264326  | -2.4832325233 | -3.7493477133 |
| H9   | 4.0690900406  | -1.8941325491 | -2.4721630135 |
| H10  | -1.4608766959 | -0.4583672943 | -1.5967324249 |
| H19  | -0.3811010265 | -3.0803581605 | -0.1344219107 |

|     |               |               |               |
|-----|---------------|---------------|---------------|
| H20 | -1.9752202314 | -2.9546306528 | -0.8382877628 |
| H21 | -1.7752467624 | -3.3127663558 | 0.8538292519  |
| H22 | -2.4169242325 | -0.9495434889 | 0.4793171546  |
| H11 | 0.7705770407  | 1.2340780346  | 3.4044492063  |
| H12 | 0.0255953980  | -0.2974783874 | 3.8893732053  |
| H13 | -0.9012479159 | 1.1766093674  | 3.9554405678  |

nuclear repulsion energy..... 1415.332104438 hartrees

-----  
 / end of geometry optimization iteration 9 /  
 -----

end of program geopt

start of program onee  
 smallest eigenvalue of S: 3.348E-04  
 number of canonical orbitals..... 368  
 end of program onee

start of program probe  
 end of program probe

start of program grid

number of gridpoints:

| atom     | H1  | C1  | C2  | C3  | C4  | C5  | C6  |
|----------|-----|-----|-----|-----|-----|-----|-----|
| C7       |     |     |     |     |     |     |     |
| grid # 1 | 72  | 87  | 87  | 89  | 89  | 87  | 86  |
| 82       |     |     |     |     |     |     |     |
| grid # 2 | 116 | 96  | 96  | 98  | 97  | 97  | 94  |
| 90       |     |     |     |     |     |     |     |
| grid # 3 | 217 | 184 | 184 | 195 | 183 | 183 | 192 |
| 175      |     |     |     |     |     |     |     |
| grid # 4 | 216 | 326 | 330 | 337 | 328 | 328 | 329 |
| 312      |     |     |     |     |     |     |     |

number of gridpoints:

| atom     | H3  | H4  | H6  | C16 | C8  | N2  | C9  |
|----------|-----|-----|-----|-----|-----|-----|-----|
| C10      |     |     |     |     |     |     |     |
| grid # 1 | 73  | 73  | 70  | 92  | 82  | 96  | 81  |
| 72       |     |     |     |     |     |     |     |
| grid # 2 | 118 | 118 | 111 | 100 | 91  | 104 | 92  |
| 79       |     |     |     |     |     |     |     |
| grid # 3 | 224 | 223 | 208 | 193 | 177 | 213 | 176 |
| 145      |     |     |     |     |     |     |     |
| grid # 4 | 224 | 223 | 208 | 340 | 310 | 391 | 295 |
| 275      |     |     |     |     |     |     |     |

number of gridpoints:

| atom     | O1  | C23 | C18 | C19 | C20 | C21 | C22 |
|----------|-----|-----|-----|-----|-----|-----|-----|
| H2       |     |     |     |     |     |     |     |
| grid # 1 | 111 | 72  | 89  | 88  | 88  | 89  | 89  |
| 71       |     |     |     |     |     |     |     |
| grid # 2 | 122 | 80  | 97  | 95  | 96  | 97  | 96  |
| 112      |     |     |     |     |     |     |     |
| grid # 3 | 255 | 149 | 183 | 183 | 183 | 184 | 183 |
| 212      |     |     |     |     |     |     |     |
| grid # 4 | 447 | 283 | 327 | 325 | 327 | 327 | 327 |
| 211      |     |     |     |     |     |     |     |

number of gridpoints:

| atom     | H5  | H7  | H8  | H9  | H10 | H19 | H20 |
|----------|-----|-----|-----|-----|-----|-----|-----|
| H21      |     |     |     |     |     |     |     |
| grid # 1 | 71  | 73  | 73  | 73  | 66  | 70  | 71  |
| 69       |     |     |     |     |     |     |     |
| grid # 2 | 111 | 118 | 118 | 118 | 106 | 108 | 109 |
| 108      |     |     |     |     |     |     |     |
| grid # 3 | 211 | 223 | 223 | 224 | 203 | 215 | 217 |
| 217      |     |     |     |     |     |     |     |
| grid # 4 | 207 | 223 | 223 | 224 | 197 | 210 | 218 |
| 213      |     |     |     |     |     |     |     |

number of gridpoints:

| atom     | H22 | H11 | H12 | H13 | total |
|----------|-----|-----|-----|-----|-------|
| grid # 1 | 69  | 71  | 71  | 71  | 2863  |
| grid # 2 | 110 | 108 | 105 | 109 | 3720  |
| grid # 3 | 216 | 215 | 211 | 215 | 7194  |
| grid # 4 | 207 | 218 | 204 | 222 | 9912  |

end of program grid

start of program rwr  
recomputing RWR matrix 14 grid: 4  
end of program rwr

start of program scf

|      | i | u | d | i | g |                  | RMS      | maximum |
|------|---|---|---|---|---|------------------|----------|---------|
|      | t | p | i | c | r |                  | density  | DIIS    |
|      | e | d | i | u | i | energy           | change   | error   |
|      | r | t | s | t | d | total energy     | change   | error   |
| etot | 1 | N | N | 2 | U | -783.00503434625 | 3.6E-04  | 1.4E-02 |
| etot | 2 | Y | Y | 6 | M | -783.02804818392 | 2.3E-02  | 4.1E-03 |
| etot | 3 | N | Y | 2 | U | -783.03054845712 | 2.5E-03  | 6.3E-04 |
| etot | 4 | Y | Y | 6 | M | -783.03065869193 | 1.1E-04  | 2.5E-04 |
| etot | 5 | Y | Y | 6 | M | -783.03068037353 | 2.2E-05  | 1.0E-04 |
| etot | 6 | Y | Y | 6 | M | -783.03068475585 | 4.4E-06  | 4.1E-05 |
| etot | 7 | Y | N | 6 | M | -783.03068421268 | -5.4E-07 | 0.0E+00 |

Energy components, in hartrees:

|     |                               |                   |       |
|-----|-------------------------------|-------------------|-------|
| (A) | Nuclear repulsion.....        | 1415.33210443810  |       |
| (E) | Total one-electron terms..... | -3875.22658025810 |       |
| (I) | Total two-electron terms..... | 1676.86379160732  |       |
| (L) | Electronic energy.....        | -2198.36278865078 | (E+I) |
| (N) | Total energy.....             | -783.03068421268  | (A+L) |

SCFE: SCF energy: HF -783.03068421268 hartrees iterations:

7

HOMO energy: -0.30095  
LUMO energy: 0.12923

Orbital energies:

|           |           |           |           |           |           |
|-----------|-----------|-----------|-----------|-----------|-----------|
| -20.52683 | -15.60247 | -11.34501 | -11.28753 | -11.25779 | -11.24922 |
| -11.24114 | -11.24007 | -11.23975 | -11.23836 | -11.23791 | -11.23492 |
| -11.23044 | -11.22991 | -11.22958 | -11.22848 | -11.22795 | -11.22718 |
| -11.20347 | -1.40175  | -1.27145  | -1.16484  | -1.14827  | -1.10611  |
| -1.03090  | -1.01804  | -1.01710  | -1.01326  | -0.96193  | -0.93408  |
| -0.85994  | -0.84133  | -0.83270  | -0.82117  | -0.79628  | -0.74249  |
| -0.71167  | -0.69456  | -0.67397  | -0.66427  | -0.64436  | -0.63721  |
| -0.62761  | -0.61424  | -0.61223  | -0.60833  | -0.59572  | -0.58410  |
| -0.57588  | -0.55222  | -0.54984  | -0.54175  | -0.53307  | -0.51885  |
| -0.51433  | -0.50761  | -0.50097  | -0.49706  | -0.48437  | -0.46924  |
| -0.46216  | -0.42457  | -0.41160  | -0.34216  | -0.33338  | -0.32160  |
| -0.30095  | 0.12923   | 0.13450   | 0.14503   | 0.15217   | 0.20620   |
| 0.23167   | 0.24163   | 0.25052   | 0.26131   | 0.28968   |           |

end of program scf

start of program derla  
end of program derla

start of program rwr  
recomputing Rwr matrix 14 grid: 4  
end of program rwr

start of program der1b

forces (hartrees/bohr) : total

| atom | label | x             | y             | z             |
|------|-------|---------------|---------------|---------------|
| 1    | H1    | -1.373718E-04 | 1.030495E-04  | -2.484581E-04 |
| 2    | C1    | 3.244042E-04  | 1.883872E-03  | 6.820277E-04  |
| 3    | C2    | -2.992705E-04 | -1.923170E-03 | -1.487067E-03 |

|       |       |               |               |               |
|-------|-------|---------------|---------------|---------------|
| 4     | C3    | -2.694873E-04 | 2.639274E-03  | 1.036148E-04  |
| 5     | C4    | 2.112426E-04  | -3.332747E-03 | -7.317086E-04 |
| 6     | C5    | 6.139853E-04  | -2.184378E-03 | -2.695905E-04 |
| 7     | C6    | -3.701372E-03 | 4.836635E-03  | -4.408113E-03 |
| 8     | C7    | 2.911239E-03  | -6.881624E-04 | 1.423238E-03  |
| 9     | H3    | -4.052756E-05 | 2.635351E-04  | -2.743812E-04 |
| 10    | H4    | -1.610996E-05 | 5.600404E-04  | 2.851475E-04  |
| 11    | H6    | 6.420110E-04  | -1.214374E-03 | 1.545260E-03  |
| 12    | C16   | 1.509192E-04  | 1.891438E-03  | 7.480516E-04  |
| 13    | C8    | -8.239532E-05 | -5.963336E-04 | -1.682294E-03 |
| 14    | N2    | 3.612162E-03  | 1.138460E-02  | 2.910671E-02  |
| 15    | C9    | -1.239325E-03 | -4.621613E-03 | -1.542498E-02 |
| 16    | C10   | 1.418085E-03  | 3.728804E-03  | -2.223565E-03 |
| 17    | O1    | -6.848788E-04 | -7.252304E-03 | 5.733728E-03  |
| 18    | C23   | -7.719663E-03 | 6.511866E-03  | -3.057802E-03 |
| 19    | C18   | 1.780575E-03  | 5.493529E-04  | 6.351478E-04  |
| 20    | C19   | -4.179016E-03 | 1.313615E-03  | 1.524875E-03  |
| 21    | C20   | -4.099859E-03 | 1.397866E-03  | 2.904105E-04  |
| 22    | C21   | 1.169174E-03  | -2.014899E-03 | -2.264286E-03 |
| 23    | C22   | 3.487780E-03  | -1.519380E-03 | -1.769026E-03 |
| 24    | H2    | -8.613886E-04 | 1.910902E-04  | -3.446411E-04 |
| 25    | H5    | 2.466087E-04  | -1.334368E-03 | -3.339408E-04 |
| 26    | H7    | 7.654884E-04  | 1.613000E-04  | -3.385733E-04 |
| 27    | H8    | 2.954715E-04  | 5.523869E-04  | 1.599179E-03  |
| 28    | H9    | 1.116291E-03  | -7.224874E-05 | -8.595172E-05 |
| 29    | H10   | -1.524094E-03 | -2.803361E-04 | -1.551203E-03 |
| 30    | H19   | 1.349237E-02  | -6.842007E-03 | -2.804427E-03 |
| 31    | H20   | 5.534243E-04  | 1.699099E-03  | -2.006370E-03 |
| 32    | H21   | -3.697573E-03 | -4.279422E-03 | 8.034846E-03  |
| 33    | H22   | -5.182788E-03 | 2.421745E-03  | 1.094322E-03  |
| 34    | H11   | -1.873151E-03 | -2.110829E-03 | -1.772787E-03 |
| 35    | H12   | 3.083038E-03  | 1.088651E-04  | -1.045174E-03 |
| 36    | H13   | -1.106393E-03 | -1.209954E-03 | -8.539752E-03 |
| ----- |       | -----         | -----         | -----         |
|       | total | -8.403957E-04 | 7.219079E-04  | 1.424752E-04  |

end of program derlb

start of program geopt 10

geometry optimization step 10

the energy is increasing and lowest energy was more than two  
iters back .

[ turning on trust-radius adjustment ]  
 reading input hessian of dimension 108  
 in five columns format  
 reading input hessian of dimension 108  
 in five columns format  
 \*\* restarting optimization from step 7 \*\*

Level shifts adjusted to satisfy step-size constraints

Step size: 0.1503519

Cos(theta): 0.7290870

Final level shift: -4.0272366E-02

energy change: 6.9933E-04 . ( 5.0000E-05 )

gradient maximum: 1.0660E-02 . ( 4.5000E-04 )

gradient rms: 2.6430E-03 . ( 3.0000E-04 )

step size: 0.15035 trust radius: 0.15000

displacement maximum: 9.6272E-02 . ( 1.8000E-03 )

displacement rms: 1.3612E-02 . ( 1.2000E-03 )

predicted energy change: -2.0552E-03 geom step: 1.5035E-

01 full step: 1.5035E-01

molecular structure not yet converged...

center of mass moved by:

x: -3.4694E-17 y: 1.1796E-16 z: 1.1102E-16

new geometry:

|      | angstroms     |               |               |
|------|---------------|---------------|---------------|
| atom | x             | y             | z             |
| H1   | -1.1965263362 | 1.8855691282  | -2.2298047204 |
| C1   | -1.1115434868 | 2.1196906157  | -1.1825132679 |
| C2   | -0.8848870881 | 2.6957352422  | 1.5031621409  |
| C3   | -0.8842842539 | 1.0857492053  | -0.2883100009 |
| C4   | -1.2217745024 | 3.4353343717  | -0.7595924593 |
| C5   | -1.1079389037 | 3.7140467557  | 0.5902985093  |
| C6   | -0.7704703680 | 1.3745219842  | 1.0745248479  |
| C7   | -0.7906360499 | -0.3520753742 | -0.7584719661 |
| H3   | -1.3954257839 | 4.2227433276  | -1.4708656554 |
| H4   | -1.1963637147 | 4.7254932682  | 0.9450632404  |
| H6   | -0.8085686509 | 2.9436459962  | 2.5426488187  |
| C16  | 0.6112720270  | -0.7616143622 | -1.2095637340 |
| C8   | -1.3978793591 | -1.2500125901 | 0.3429212699  |
| N2   | -0.5305927771 | 0.3310127766  | 1.9943046677  |
| C9   | -0.7564671663 | -0.9832207873 | 1.6935306299  |
| C10  | 0.0035891273  | 0.6401001546  | 3.3222429426  |
| O1   | -0.4916217429 | -1.8634405147 | 2.4569779987  |
| C23  | -1.4089741134 | -2.7395226939 | 0.0182194197  |
| C18  | 3.1416646165  | -1.5707635243 | -2.0803820407 |
| C19  | 0.7648259694  | -1.4935607298 | -2.3821695916 |
| C20  | 1.7543025934  | -0.4309040148 | -0.4857614877 |
| C21  | 3.0053824643  | -0.8347404848 | -0.9138283550 |
| C22  | 2.0155526546  | -1.8966509362 | -2.8166195489 |
| H2   | -0.1035170440 | -1.7523704637 | -2.9647847202 |
| H5   | 1.6736777196  | 0.1577096474  | 0.4096372705  |
| H7   | 3.8741159092  | -0.5707001654 | -0.3374777491 |
| H8   | 2.1069833442  | -2.4629255042 | -3.7275007193 |
| H9   | 4.1153489493  | -1.8827665741 | -2.4122475273 |

|     |               |               |               |
|-----|---------------|---------------|---------------|
| H10 | -1.4351992504 | -0.4535906415 | -1.6228220717 |
| H19 | -0.4081118344 | -3.1226284864 | -0.0613784478 |
| H20 | -1.9276262059 | -2.9162422832 | -0.9187542167 |
| H21 | -1.9140437425 | -3.2917283475 | 0.7927312454  |
| H22 | -2.4272183048 | -0.9140056574 | 0.4515085466  |
| H11 | 0.9425523571  | 1.1839804530  | 3.2351894634  |
| H12 | 0.1689117525  | -0.2865131295 | 3.8396965754  |
| H13 | -0.6878268681 | 1.2350095685  | 3.9151050647  |

nuclear repulsion energy..... 1415.888913871 hartrees

-----  
 / end of geometry optimization iteration 10 /  
 -----

end of program geopt

start of program onee  
 smallest eigenvalue of S: 3.341E-04  
 number of canonical orbitals..... 368  
 end of program onee

start of program probe  
 end of program probe

start of program grid

number of gridpoints:

| atom     | H1  | C1  | C2  | C3  | C4  | C5  | C6  |
|----------|-----|-----|-----|-----|-----|-----|-----|
| C7       |     |     |     |     |     |     |     |
| grid # 1 | 72  | 87  | 87  | 89  | 89  | 87  | 83  |
| 82       |     |     |     |     |     |     |     |
| grid # 2 | 116 | 97  | 96  | 98  | 97  | 97  | 95  |
| 90       |     |     |     |     |     |     |     |
| grid # 3 | 217 | 182 | 184 | 195 | 183 | 184 | 191 |
| 176      |     |     |     |     |     |     |     |
| grid # 4 | 216 | 326 | 329 | 338 | 328 | 328 | 325 |
| 314      |     |     |     |     |     |     |     |

number of gridpoints:

| atom     | H3  | H4  | H6  | C16 | C8  | N2  | C9  |
|----------|-----|-----|-----|-----|-----|-----|-----|
| C10      |     |     |     |     |     |     |     |
| grid # 1 | 73  | 73  | 71  | 92  | 82  | 95  | 82  |
| 70       |     |     |     |     |     |     |     |
| grid # 2 | 118 | 118 | 110 | 100 | 91  | 104 | 92  |
| 78       |     |     |     |     |     |     |     |
| grid # 3 | 224 | 223 | 208 | 194 | 176 | 212 | 176 |
| 149      |     |     |     |     |     |     |     |
| grid # 4 | 224 | 223 | 207 | 342 | 311 | 391 | 291 |
| 279      |     |     |     |     |     |     |     |



```

number of gridpoints:
  atom      01      C23      C18      C19      C20      C21      C22
H2
  grid # 1      111      73      89      88      88      89      89
71
  grid # 2      122      80      97      95      96      97      96
112
  grid # 3      256      147      183      183      182      184      183
212
  grid # 4      449      285      327      326      327      327      327
211

```

```

number of gridpoints:
  atom      H5      H7      H8      H9      H10      H19      H20
H21
  grid # 1      70      73      73      73      66      70      71
70
  grid # 2      111      118      118      118      106      108      110
108
  grid # 3      210      223      223      224      203      217      218
216
  grid # 4      205      223      223      224      197      212      217
215

```

```

number of gridpoints:
  atom      H22      H11      H12      H13      total
grid # 1      69      71      70      71      2859
grid # 2      110      110      105      107      3721
grid # 3      214      216      212      213      7193
grid # 4      211      221      208      217      9924

```

end of program grid

start of program rwr  
end of program rwr

start of program scf

|      | i | u | d | i | g |                  | RMS      | maximum |         |
|------|---|---|---|---|---|------------------|----------|---------|---------|
|      | t | p | i | c | r |                  | density  | DIIS    |         |
|      | e | d | i | u | i | energy           | change   | error   |         |
|      | r | t | s | t | d | total energy     | change   |         |         |
| etot | 1 | N | N | 2 | U | -783.02284735130 |          | 2.2E-04 | 9.4E-03 |
| etot | 2 | Y | Y | 6 | M | -783.03152276544 | 8.7E-03  | 9.5E-05 | 2.6E-03 |
| etot | 3 | N | Y | 2 | U | -783.03246863783 | 9.5E-04  | 2.6E-05 | 4.4E-04 |
| etot | 4 | Y | Y | 6 | M | -783.03251086369 | 4.2E-05  | 1.0E-05 | 1.2E-04 |
| etot | 5 | Y | Y | 6 | M | -783.03251580557 | 4.9E-06  | 2.9E-06 | 4.3E-05 |
| etot | 6 | Y | N | 6 | M | -783.03251488581 | -9.2E-07 | 0.0E+00 | 0.0E+00 |

Energy components, in hartrees:

|     |                               |                   |       |
|-----|-------------------------------|-------------------|-------|
| (A) | Nuclear repulsion.....        | 1415.88891387138  |       |
| (E) | Total one-electron terms..... | -3876.35266144715 |       |
| (I) | Total two-electron terms..... | 1677.43123268996  |       |
| (L) | Electronic energy.....        | -2198.92142875719 | (E+I) |
| (N) | Total energy.....             | -783.03251488581  | (A+L) |

SCFE: SCF energy: HF -783.03251488581 hartrees iterations:

6

HOMO energy: -0.30209

LUMO energy: 0.12905

Orbital energies:

|           |           |           |           |           |           |
|-----------|-----------|-----------|-----------|-----------|-----------|
| -20.52625 | -15.60077 | -11.34476 | -11.28667 | -11.25734 | -11.24954 |
| -11.24156 | -11.24147 | -11.24018 | -11.23863 | -11.23807 | -11.23508 |
| -11.23092 | -11.23034 | -11.22996 | -11.22927 | -11.22815 | -11.22727 |
| -11.20700 | -1.40001  | -1.26972  | -1.16499  | -1.14871  | -1.10591  |
| -1.03006  | -1.01834  | -1.01751  | -1.01306  | -0.96223  | -0.93312  |
| -0.85836  | -0.83982  | -0.83303  | -0.82137  | -0.79629  | -0.74142  |
| -0.71145  | -0.69473  | -0.67357  | -0.66416  | -0.64422  | -0.63790  |
| -0.62738  | -0.61437  | -0.61160  | -0.60883  | -0.59627  | -0.58369  |
| -0.57616  | -0.55245  | -0.54904  | -0.54029  | -0.53261  | -0.51907  |
| -0.51498  | -0.50736  | -0.50074  | -0.49783  | -0.48461  | -0.46871  |
| -0.46264  | -0.42257  | -0.41074  | -0.34226  | -0.33322  | -0.32233  |
| -0.30209  | 0.12905   | 0.13415   | 0.14479   | 0.15224   | 0.20564   |
| 0.23009   | 0.24096   | 0.24653   | 0.26195   | 0.28652   |           |

end of program scf

start of program derla

end of program derla

start of program rwr

end of program rwr

start of program der1b

forces (hartrees/bohr) : total

| atom | label | x             | y             | z             |
|------|-------|---------------|---------------|---------------|
| 1    | H1    | -7.415435E-05 | 3.037119E-05  | -2.236462E-04 |
| 2    | C1    | 2.934148E-04  | 9.479030E-04  | 5.894910E-04  |
| 3    | C2    | 2.683531E-04  | -8.312424E-04 | -1.017328E-03 |

|       |       |               |               |               |
|-------|-------|---------------|---------------|---------------|
| 4     | C3    | -1.487681E-04 | 1.086158E-03  | 2.431753E-04  |
| 5     | C4    | 1.244034E-04  | -1.603484E-03 | 1.121363E-04  |
| 6     | C5    | 3.763030E-04  | -9.202544E-04 | -5.171245E-04 |
| 7     | C6    | -2.312182E-03 | 2.080362E-03  | -1.112723E-03 |
| 8     | C7    | 1.174684E-03  | -6.107119E-04 | 8.607345E-04  |
| 9     | H3    | 5.504253E-06  | -9.140865E-05 | 4.033519E-05  |
| 10    | H4    | 9.625167E-05  | 2.110069E-04  | 8.111222E-05  |
| 11    | H6    | 3.129851E-04  | -6.200578E-04 | 8.663554E-04  |
| 12    | C16   | -3.689890E-04 | 6.991416E-04  | 3.321559E-04  |
| 13    | C8    | -6.907380E-04 | -1.510829E-04 | -1.315335E-03 |
| 14    | N2    | 3.561948E-03  | 7.594461E-03  | 1.131450E-02  |
| 15    | C9    | -1.189842E-03 | -5.168063E-04 | -8.515025E-03 |
| 16    | C10   | 6.571713E-05  | 3.378263E-03  | -1.150722E-03 |
| 17    | O1    | 1.692355E-04  | -6.273977E-03 | 5.179403E-03  |
| 18    | C23   | -2.319084E-03 | 3.260714E-03  | -1.060312E-03 |
| 19    | C18   | 5.699694E-04  | -4.172793E-04 | -2.911476E-04 |
| 20    | C19   | -2.493668E-03 | 5.706252E-04  | 4.862085E-04  |
| 21    | C20   | -1.898528E-03 | 1.128855E-03  | 4.770101E-04  |
| 22    | C21   | 8.983130E-04  | -6.948315E-04 | -8.897197E-04 |
| 23    | C22   | 1.778971E-03  | -5.653975E-04 | -3.899443E-04 |
| 24    | H2    | 8.666562E-05  | 9.790290E-05  | 3.166642E-04  |
| 25    | H5    | -6.217467E-05 | -4.698643E-04 | -7.563567E-05 |
| 26    | H7    | 4.488473E-04  | 8.066850E-05  | 4.800551E-05  |
| 27    | H8    | 2.436248E-04  | 2.238760E-04  | 2.514228E-04  |
| 28    | H9    | 6.231766E-04  | -1.297313E-04 | -2.963009E-04 |
| 29    | H10   | -9.038365E-04 | -1.645274E-04 | -1.022606E-03 |
| 30    | H19   | 4.860259E-03  | -2.781635E-03 | -9.380783E-04 |
| 31    | H20   | 3.986399E-04  | 5.906100E-04  | -9.201650E-04 |
| 32    | H21   | -1.619973E-03 | -1.315983E-03 | 2.955558E-03  |
| 33    | H22   | -1.732369E-03 | 5.198598E-04  | 5.420193E-04  |
| 34    | H11   | -2.633893E-03 | -1.009749E-03 | -3.686263E-04 |
| 35    | H12   | 1.591662E-03  | -1.183732E-03 | -8.915990E-04 |
| 36    | H13   | -1.770045E-04 | -1.172144E-03 | -3.863008E-03 |
| ----- |       | -----         | -----         | -----         |
|       | total | -6.762774E-04 | 9.768783E-04  | -1.627534E-04 |

end of program derlb

start of program geopt 11

geometry optimization step 11

reading input hessian of dimension 108

in five columns format

reading input hessian of dimension 108

in five columns format

Level shifts adjusted to satisfy step-size constraints

Step size: 0.0756353

Cos(theta): 0.7626382

Final level shift: -8.3692244E-02

energy change: -8.5280E-04 . ( 5.0000E-05 )  
gradient maximum: 8.3698E-03 . ( 4.5000E-04 )  
gradient rms: 1.9294E-03 . ( 3.0000E-04 )  
step size: 0.07564 trust radius: 0.07500  
displacement maximum: 3.8408E-02 . ( 1.8000E-03 )  
displacement rms: 6.8477E-03 . ( 1.2000E-03 )  
predicted energy change: -8.5404E-04 geom step: 7.5635E-  
02 full step: 7.5635E-02  
molecular structure not yet converged...

center of mass moved by:

x: -7.5400E-03 y: -1.6054E-03 z: 4.7227E-03

new geometry:

|      | angstroms     |               |               |
|------|---------------|---------------|---------------|
| atom | x             | y             | z             |
| H1   | -1.1925017276 | 1.8826081976  | -2.2294416364 |
| C1   | -1.1093829937 | 2.1173065617  | -1.1819863078 |
| C2   | -0.8852742304 | 2.6923260066  | 1.5030138270  |
| C3   | -0.8900752082 | 1.0847098278  | -0.2859055520 |
| C4   | -1.2134745855 | 3.4309942606  | -0.7598270701 |
| C5   | -1.0994482320 | 3.7102571935  | 0.5892878767  |
| C6   | -0.7794293310 | 1.3735884709  | 1.0762067079  |
| C7   | -0.7934749209 | -0.3532481356 | -0.7575339651 |
| H3   | -1.3804401178 | 4.2190959355  | -1.4712499741 |
| H4   | -1.1807368421 | 4.7225208510  | 0.9430883104  |
| H6   | -0.8057456291 | 2.9366937169  | 2.5436965141  |
| C16  | 0.6106626470  | -0.7586894262 | -1.2063692779 |
| C8   | -1.4077528813 | -1.2501470418 | 0.3393248581  |
| N2   | -0.5310790914 | 0.3330251795  | 2.0010752581  |
| C9   | -0.7657099301 | -0.9887147463 | 1.6911655999  |
| C10  | 0.0287723219  | 0.6502908161  | 3.3045254975  |
| O1   | -0.5196715210 | -1.8762777587 | 2.4594219877  |
| C23  | -1.4106576091 | -2.7409884857 | 0.0155044091  |
| C18  | 3.1501850169  | -1.5636479631 | -2.0775989773 |
| C19  | 0.7679768137  | -1.4870460757 | -2.3800598934 |
| C20  | 1.7526321050  | -0.4315560861 | -0.4812277891 |
| C21  | 3.0076161366  | -0.8327053658 | -0.9100094586 |
| C22  | 2.0242182949  | -1.8882973534 | -2.8139109308 |
| H2   | -0.0985127616 | -1.7460513447 | -2.9650305728 |
| H5   | 1.6714230491  | 0.1480722095  | 0.4179444553  |
| H7   | 3.8754911865  | -0.5672003216 | -0.3315442456 |
| H8   | 2.1181242522  | -2.4505839486 | -3.7254127581 |
| H9   | 4.1263396729  | -1.8712480862 | -2.4090735391 |
| H10  | -1.4360386194 | -0.4534641485 | -1.6263503116 |
| H19  | -0.4033713645 | -3.1377417631 | -0.0386607895 |
| H20  | -1.8967539122 | -2.9117198172 | -0.9397041310 |
| H21  | -1.9430909938 | -3.2909599198 | 0.7817172649  |
| H22  | -2.4392500465 | -0.9127869448 | 0.4472138934  |
| H11  | 0.9470880126  | 1.2166799198  | 3.1860172758  |

H12 0.2404992749 -0.2765714672 3.8083321975  
H13 -0.6748350429 1.2224247433 3.8983069680

nuclear repulsion energy..... 1415.778347722 hartrees

-----  
/ end of geometry optimization iteration 11 /  
-----

end of program geopt

start of program onee  
smallest eigenvalue of S: 3.312E-04  
number of canonical orbitals..... 368  
end of program onee

start of program probe  
end of program probe

start of program grid

number of gridpoints:

| atom     | H1  | C1  | C2  | C3  | C4  | C5  | C6  |
|----------|-----|-----|-----|-----|-----|-----|-----|
| C7       |     |     |     |     |     |     |     |
| grid # 1 | 72  | 87  | 89  | 90  | 89  | 87  | 83  |
| 81       |     |     |     |     |     |     |     |
| grid # 2 | 116 | 96  | 96  | 98  | 97  | 97  | 94  |
| 90       |     |     |     |     |     |     |     |
| grid # 3 | 216 | 182 | 183 | 194 | 183 | 184 | 189 |
| 176      |     |     |     |     |     |     |     |
| grid # 4 | 216 | 326 | 328 | 338 | 328 | 328 | 325 |
| 312      |     |     |     |     |     |     |     |

number of gridpoints:

| atom     | H3  | H4  | H6  | C16 | C8  | N2  | C9  |
|----------|-----|-----|-----|-----|-----|-----|-----|
| C10      |     |     |     |     |     |     |     |
| grid # 1 | 73  | 73  | 71  | 92  | 82  | 95  | 82  |
| 69       |     |     |     |     |     |     |     |
| grid # 2 | 118 | 118 | 110 | 100 | 90  | 105 | 92  |
| 79       |     |     |     |     |     |     |     |
| grid # 3 | 224 | 223 | 207 | 194 | 174 | 211 | 176 |
| 145      |     |     |     |     |     |     |     |
| grid # 4 | 224 | 223 | 207 | 342 | 311 | 390 | 293 |
| 277      |     |     |     |     |     |     |     |

number of gridpoints:

| atom     | O1  | C23 | C18 | C19 | C20 | C21 | C22 |
|----------|-----|-----|-----|-----|-----|-----|-----|
| H2       |     |     |     |     |     |     |     |
| grid # 1 | 111 | 73  | 89  | 88  | 88  | 89  | 89  |
| 71       |     |     |     |     |     |     |     |

|          |     |     |     |     |     |     |     |
|----------|-----|-----|-----|-----|-----|-----|-----|
| grid # 2 | 122 | 81  | 97  | 95  | 96  | 97  | 96  |
| 112      |     |     |     |     |     |     |     |
| grid # 3 | 256 | 148 | 183 | 182 | 182 | 183 | 183 |
| 212      |     |     |     |     |     |     |     |
| grid # 4 | 448 | 287 | 327 | 326 | 327 | 327 | 327 |
| 211      |     |     |     |     |     |     |     |

number of gridpoints:

|          |     |     |     |     |     |     |     |
|----------|-----|-----|-----|-----|-----|-----|-----|
| atom     | H5  | H7  | H8  | H9  | H10 | H19 | H20 |
| H21      |     |     |     |     |     |     |     |
| grid # 1 | 70  | 73  | 73  | 73  | 66  | 70  | 71  |
| 70       |     |     |     |     |     |     |     |
| grid # 2 | 111 | 118 | 118 | 118 | 106 | 109 | 110 |
| 108      |     |     |     |     |     |     |     |
| grid # 3 | 210 | 222 | 223 | 224 | 201 | 218 | 216 |
| 217      |     |     |     |     |     |     |     |
| grid # 4 | 205 | 223 | 223 | 224 | 196 | 215 | 217 |
| 216      |     |     |     |     |     |     |     |

number of gridpoints:

|          |     |     |     |     |       |
|----------|-----|-----|-----|-----|-------|
| atom     | H22 | H11 | H12 | H13 | total |
| grid # 1 | 69  | 71  | 71  | 71  | 2861  |
| grid # 2 | 110 | 110 | 107 | 108 | 3725  |
| grid # 3 | 215 | 216 | 214 | 213 | 7179  |
| grid # 4 | 213 | 215 | 208 | 212 | 9915  |

end of program grid

start of program rwr  
end of program rwr

start of program scf

|      | i | u | d | i | g |                  | RMS     | maximum |
|------|---|---|---|---|---|------------------|---------|---------|
|      | t | p | i | c | r |                  | energy  | DIIS    |
|      | e | d | i | u | i | total energy     | density | error   |
|      | r | t | s | t | d |                  | change  |         |
| etot | 1 | N | N | 2 | U | -783.03169748385 | 8.7E-05 | 2.2E-03 |
| etot | 2 | Y | Y | 6 | M | -783.03283974474 | 1.1E-03 | 6.8E-04 |
| etot | 3 | Y | Y | 6 | M | -783.03295741274 | 1.2E-04 | 1.5E-04 |
| etot | 4 | Y | Y | 6 | M | -783.03296983025 | 1.2E-05 | 5.6E-05 |
| etot | 5 | Y | N | 6 | M | -783.03297148991 | 1.7E-06 | 0.0E+00 |

Energy components, in hartrees:

|     |                               |                   |       |
|-----|-------------------------------|-------------------|-------|
| (A) | Nuclear repulsion.....        | 1415.77834772171  |       |
| (E) | Total one-electron terms..... | -3876.12210866648 |       |
| (I) | Total two-electron terms..... | 1677.31078945486  |       |
| (L) | Electronic energy.....        | -2198.81131921162 | (E+I) |

(N) Total energy..... -783.03297148991 (A+L)

SCFE: SCF energy: HF -783.03297148991 hartrees iterations:  
5

HOMO energy: -0.30239  
LUMO energy: 0.12916

Orbital energies:

|           |           |           |           |           |           |
|-----------|-----------|-----------|-----------|-----------|-----------|
| -20.52749 | -15.60024 | -11.34678 | -11.28597 | -11.25620 | -11.25012 |
| -11.24296 | -11.24152 | -11.24066 | -11.23827 | -11.23761 | -11.23468 |
| -11.23133 | -11.23053 | -11.22985 | -11.22980 | -11.22850 | -11.22779 |
| -11.20925 | -1.39681  | -1.26922  | -1.16533  | -1.14927  | -1.10629  |
| -1.03006  | -1.01904  | -1.01811  | -1.01240  | -0.96226  | -0.93270  |
| -0.85784  | -0.83845  | -0.83345  | -0.82172  | -0.79622  | -0.74091  |
| -0.71135  | -0.69495  | -0.67351  | -0.66430  | -0.64398  | -0.63837  |
| -0.62746  | -0.61459  | -0.61210  | -0.60940  | -0.59737  | -0.58299  |
| -0.57675  | -0.55288  | -0.54831  | -0.54015  | -0.53189  | -0.51837  |
| -0.51531  | -0.50739  | -0.50074  | -0.49807  | -0.48493  | -0.46840  |
| -0.46313  | -0.42192  | -0.41106  | -0.34271  | -0.33260  | -0.32326  |
| -0.30239  | 0.12916   | 0.13421   | 0.14403   | 0.15230   | 0.20371   |
| 0.22963   | 0.24069   | 0.24563   | 0.26192   | 0.28577   |           |

end of program scf

start of program derla  
end of program derla

start of program rwr  
end of program rwr

start of program derlb

forces (hartrees/bohr) : total

| atom | label | x             | y             | z             |
|------|-------|---------------|---------------|---------------|
| 1    | H1    | 2.504108E-06  | 5.175930E-05  | -1.220436E-04 |
| 2    | C1    | -2.225581E-05 | -5.053871E-04 | -2.740533E-04 |
| 3    | C2    | 4.991298E-05  | 9.875082E-04  | 7.067818E-04  |
| 4    | C3    | 1.235580E-04  | -8.592368E-04 | -4.793449E-04 |
| 5    | C4    | -9.131232E-06 | 6.978050E-04  | 1.500731E-04  |
| 6    | C5    | -9.388585E-05 | 4.084856E-04  | -6.039832E-05 |
| 7    | C6    | 2.839386E-04  | -1.296684E-03 | -1.261189E-04 |
| 8    | C7    | -3.880618E-04 | 6.239050E-04  | -4.981213E-04 |
| 9    | H3    | -8.134166E-05 | 2.732067E-04  | -1.968636E-04 |
| 10   | H4    | 1.114689E-05  | 3.843725E-04  | -6.471063E-06 |
| 11   | H6    | 5.821701E-05  | -9.719191E-06 | 2.547380E-04  |

|       |       |               |               |               |
|-------|-------|---------------|---------------|---------------|
| 12    | C16   | -6.313755E-04 | -3.288750E-04 | 2.792912E-04  |
| 13    | C8    | 1.707411E-03  | -5.435318E-04 | -3.376603E-04 |
| 14    | N2    | -1.755000E-04 | -2.957523E-03 | -3.192080E-03 |
| 15    | C9    | -7.241573E-04 | 1.180795E-03  | 2.136114E-03  |
| 16    | C10   | -1.127571E-05 | -8.951119E-04 | -7.563417E-05 |
| 17    | O1    | 1.019333E-04  | 2.474988E-03  | -4.925087E-04 |
| 18    | C23   | 5.891362E-04  | -5.699551E-04 | 7.428124E-04  |
| 19    | C18   | -1.634850E-04 | -3.827278E-04 | -4.512226E-04 |
| 20    | C19   | 1.219189E-03  | -7.321116E-04 | -1.059769E-03 |
| 21    | C20   | 1.261004E-03  | -8.011960E-05 | -2.577875E-04 |
| 22    | C21   | -4.437095E-04 | 1.106407E-03  | 1.339046E-03  |
| 23    | C22   | -1.730042E-03 | 4.828056E-04  | 3.717746E-04  |
| 24    | H2    | 1.675873E-04  | 8.494269E-06  | 5.871413E-05  |
| 25    | H5    | -8.364469E-05 | 4.896625E-04  | 8.008607E-04  |
| 26    | H7    | -1.912086E-04 | -5.163556E-05 | 4.244774E-05  |
| 27    | H8    | -2.121368E-05 | -3.796039E-04 | -6.952036E-04 |
| 28    | H9    | -1.108485E-04 | -7.185916E-05 | -1.978142E-04 |
| 29    | H10   | 7.677657E-05  | 7.279257E-06  | 1.253114E-04  |
| 30    | H19   | -1.060459E-03 | 8.010038E-04  | 2.658513E-04  |
| 31    | H20   | -6.437881E-04 | -1.572396E-04 | -3.268590E-04 |
| 32    | H21   | 3.123074E-04  | 3.438650E-04  | -9.427729E-04 |
| 33    | H22   | -3.838244E-05 | -4.139867E-04 | 1.056875E-04  |
| 34    | H11   | -1.071632E-03 | 9.129954E-04  | 8.673988E-04  |
| 35    | H12   | 2.574226E-04  | 2.035965E-04  | 3.146390E-04  |
| 36    | H13   | 8.062245E-04  | -1.155545E-04 | 1.032341E-03  |
| ----- |       | -----         | -----         | -----         |
|       | total | -6.671277E-04 | 1.088073E-03  | -1.988441E-04 |

end of program der1b

start of program geopt 12

geometry optimization step 12

reading input hessian of dimension 108

in five columns format

reading input hessian of dimension 108

in five columns format

Level shifts adjusted to satisfy step-size constraints

Step size: 0.0377513

Cos(theta): 0.8098352

Final level shift: -8.1398026E-02

energy change: -4.5660E-04 . ( 5.0000E-05 )

gradient maximum: 3.7168E-03 . ( 4.5000E-04 )

gradient rms: 9.1637E-04 . ( 3.0000E-04 )

step size: 0.03775 trust radius: 0.03750

displacement maximum: 1.9221E-02 . ( 1.8000E-03 )

displacement rms: 3.4178E-03 . ( 1.2000E-03 )



predicted energy change: -2.1272E-04 geom step: 3.7751E-02  
full step: 3.7751E-02  
molecular structure not yet converged...

center of mass moved by:  
x: 4.0058E-03 y: 1.2459E-03 z: -2.1634E-03

new geometry:

|      | angstroms     |               |               |
|------|---------------|---------------|---------------|
| atom | x             | y             | z             |
| H1   | -1.1940518699 | 1.8851648329  | -2.2297251280 |
| C1   | -1.1095988722 | 2.1188908127  | -1.1820901870 |
| C2   | -0.8832994453 | 2.6939962030  | 1.5038491099  |
| C3   | -0.8867906379 | 1.0851574978  | -0.2874730932 |
| C4   | -1.2156764802 | 3.4336443853  | -0.7585618674 |
| C5   | -1.1010226760 | 3.7127556348  | 0.5908523272  |
| C6   | -0.7740809011 | 1.3743108087  | 1.0749234290  |
| C7   | -0.7911214007 | -0.3528972859 | -0.7581620366 |
| H3   | -1.3855816664 | 4.2219218212  | -1.4695876168 |
| H4   | -1.1845658997 | 4.7248546539  | 0.9453079489  |
| H6   | -0.8037815150 | 2.9376627809  | 2.5448192557  |
| C16  | 0.6115475975  | -0.7602027662 | -1.2088456057 |
| C8   | -1.4003137811 | -1.2505344362 | 0.3413242381  |
| N2   | -0.5264146756 | 0.3336750773  | 1.9972837586  |
| C9   | -0.7608481633 | -0.9842104684 | 1.6931655530  |
| C10  | 0.0086392301  | 0.6507271102  | 3.3147801233  |
| O1   | -0.5128987537 | -1.8660309647 | 2.4643712343  |
| C23  | -1.4041755027 | -2.7402927920 | 0.0170991849  |
| C18  | 3.1435287172  | -1.5725288680 | -2.0824306293 |
| C19  | 0.7645153308  | -1.4886970369 | -2.3833314230 |
| C20  | 1.7551610112  | -0.4347978966 | -0.4838987649 |
| C21  | 3.0068126588  | -0.8401862801 | -0.9138642198 |
| C22  | 2.0163547953  | -1.8932652332 | -2.8187807980 |
| H2   | -0.1037513634 | -1.7449165960 | -2.9667177726 |
| H5   | 1.6752564983  | 0.1462083250  | 0.4155641285  |
| H7   | 3.8760006692  | -0.5796071627 | -0.3364314624 |
| H8   | 2.1073056630  | -2.4569067874 | -3.7311017080 |
| H9   | 4.1172395122  | -1.8849526858 | -2.4157651299 |
| H10  | -1.4360254873 | -0.4540727475 | -1.6243857001 |
| H19  | -0.3987003210 | -3.1305017978 | -0.0464586848 |
| H20  | -1.9024784854 | -2.9133210290 | -0.9320302088 |
| H21  | -1.9259285607 | -3.2917205349 | 0.7859806359  |
| H22  | -2.4314879671 | -0.9171609465 | 0.4508030954  |
| H11  | 0.9117436350  | 1.2462227231  | 3.2196181266  |
| H12  | 0.2396808818  | -0.2759451348 | 3.8100816828  |
| H13  | -0.7131821509 | 1.1947704380  | 3.9159771581  |

nuclear repulsion energy..... 1415.784744570 hartrees

-----  
/ end of geometry optimization iteration 12 /  
-----

end of program geopt

start of program onee

smallest eigenvalue of S: 3.330E-04

number of canonical orbitals..... 368

end of program onee

start of program probe

end of program probe

start of program grid

number of gridpoints:

|          | atom | H1  | C1  | C2  | C3  | C4  | C5  | C6  |
|----------|------|-----|-----|-----|-----|-----|-----|-----|
| C7       |      |     |     |     |     |     |     |     |
| grid # 1 |      | 72  | 87  | 89  | 89  | 89  | 87  | 83  |
| 81       |      |     |     |     |     |     |     |     |
| grid # 2 |      | 116 | 97  | 96  | 98  | 97  | 97  | 95  |
| 90       |      |     |     |     |     |     |     |     |
| grid # 3 |      | 217 | 182 | 184 | 195 | 183 | 184 | 189 |
| 177      |      |     |     |     |     |     |     |     |
| grid # 4 |      | 216 | 326 | 328 | 338 | 328 | 328 | 326 |
| 314      |      |     |     |     |     |     |     |     |

number of gridpoints:

|          | atom | H3  | H4  | H6  | C16 | C8  | N2  | C9  |
|----------|------|-----|-----|-----|-----|-----|-----|-----|
| C10      |      |     |     |     |     |     |     |     |
| grid # 1 |      | 73  | 73  | 71  | 92  | 82  | 96  | 82  |
| 68       |      |     |     |     |     |     |     |     |
| grid # 2 |      | 118 | 118 | 110 | 100 | 91  | 105 | 92  |
| 78       |      |     |     |     |     |     |     |     |
| grid # 3 |      | 224 | 223 | 206 | 194 | 176 | 211 | 176 |
| 147      |      |     |     |     |     |     |     |     |
| grid # 4 |      | 224 | 223 | 207 | 342 | 311 | 390 | 293 |
| 273      |      |     |     |     |     |     |     |     |

number of gridpoints:

|          | atom | O1  | C23 | C18 | C19 | C20 | C21 | C22 |
|----------|------|-----|-----|-----|-----|-----|-----|-----|
| H2       |      |     |     |     |     |     |     |     |
| grid # 1 |      | 111 | 71  | 89  | 88  | 88  | 89  | 89  |
| 71       |      |     |     |     |     |     |     |     |
| grid # 2 |      | 122 | 79  | 97  | 95  | 96  | 97  | 96  |
| 112      |      |     |     |     |     |     |     |     |
| grid # 3 |      | 256 | 152 | 183 | 183 | 182 | 184 | 183 |
| 212      |      |     |     |     |     |     |     |     |
| grid # 4 |      | 448 | 290 | 327 | 326 | 327 | 327 | 327 |
| 211      |      |     |     |     |     |     |     |     |

number of gridpoints:

| atom     | H5  | H7  | H8  | H9  | H10 | H19 | H20 |
|----------|-----|-----|-----|-----|-----|-----|-----|
| H21      |     |     |     |     |     |     |     |
| grid # 1 | 70  | 73  | 73  | 73  | 66  | 70  | 71  |
| 70       |     |     |     |     |     |     |     |
| grid # 2 | 111 | 118 | 118 | 118 | 106 | 108 | 110 |
| 108      |     |     |     |     |     |     |     |
| grid # 3 | 210 | 223 | 223 | 224 | 203 | 217 | 217 |
| 217      |     |     |     |     |     |     |     |
| grid # 4 | 206 | 223 | 223 | 224 | 196 | 212 | 216 |
| 215      |     |     |     |     |     |     |     |

number of gridpoints:

| atom     | H22 | H11 | H12 | H13 | total |
|----------|-----|-----|-----|-----|-------|
| grid # 1 | 69  | 71  | 71  | 71  | 2858  |
| grid # 2 | 110 | 109 | 106 | 108 | 3722  |
| grid # 3 | 214 | 216 | 214 | 214 | 7195  |
| grid # 4 | 211 | 216 | 207 | 214 | 9913  |

end of program grid

start of program rwr  
recomputing Rwr matrix 14 grid: 4  
end of program rwr

start of program scf

|      | i | u | d | i | g |                  | RMS     | maximum |
|------|---|---|---|---|---|------------------|---------|---------|
|      | t | p | i | c | r |                  | density | DIIS    |
|      | e | d | i | u | i | energy           | change  | error   |
|      | r | t | s | t | d | total energy     | change  |         |
| etot | 1 | N | N | 1 | U | -783.03248854808 | 7.2E-05 | 2.5E-03 |
| etot | 2 | Y | Y | 4 | M | -783.03293483029 | 4.5E-04 | 6.3E-04 |
| etot | 3 | Y | Y | 4 | M | -783.03298057352 | 4.6E-05 | 1.1E-04 |
| etot | 4 | Y | Y | 4 | M | -783.03298388308 | 3.3E-06 | 3.8E-05 |
| etot | 5 | Y | N | 4 | M | -783.03298389002 | 6.9E-09 | 0.0E+00 |

Energy components, in hartrees:

|     |                               |                   |       |
|-----|-------------------------------|-------------------|-------|
| (A) | Nuclear repulsion.....        | 1415.78474457045  |       |
| (E) | Total one-electron terms..... | -3876.14142059949 |       |
| (I) | Total two-electron terms..... | 1677.32369213902  |       |
| (L) | Electronic energy.....        | -2198.81772846047 | (E+I) |
| (N) | Total energy.....             | -783.03298389002  | (A+L) |

SCFE: SCF energy: HF -783.03298389002 hartrees iterations:  
5

HOMO energy: -0.30204

LUMO energy: 0.12919

Orbital energies:

|           |           |           |           |           |           |
|-----------|-----------|-----------|-----------|-----------|-----------|
| -20.52677 | -15.60047 | -11.34587 | -11.28609 | -11.25654 | -11.24988 |
| -11.24240 | -11.24151 | -11.24044 | -11.23842 | -11.23782 | -11.23476 |
| -11.23113 | -11.23028 | -11.23004 | -11.22950 | -11.22837 | -11.22757 |
| -11.20844 | -1.39829  | -1.26971  | -1.16516  | -1.14889  | -1.10620  |
| -1.03007  | -1.01851  | -1.01779  | -1.01279  | -0.96246  | -0.93282  |
| -0.85811  | -0.83903  | -0.83318  | -0.82155  | -0.79618  | -0.74113  |
| -0.71139  | -0.69485  | -0.67342  | -0.66425  | -0.64423  | -0.63810  |
| -0.62738  | -0.61445  | -0.61193  | -0.60918  | -0.59703  | -0.58342  |
| -0.57639  | -0.55261  | -0.54844  | -0.54039  | -0.53197  | -0.51881  |
| -0.51507  | -0.50735  | -0.50075  | -0.49791  | -0.48473  | -0.46855  |
| -0.46292  | -0.42202  | -0.41113  | -0.34243  | -0.33295  | -0.32275  |
| -0.30204  | 0.12919   | 0.13422   | 0.14447   | 0.15229   | 0.20453   |
| 0.22986   | 0.24088   | 0.24667   | 0.26167   | 0.28665   |           |

end of program scf

start of program derla

end of program derla

start of program rwr

recomputing RwR matrix 14 grid: 4

end of program rwr

start of program der1b

forces (hartrees/bohr) : total

| atom | label | x             | y             | z             |
|------|-------|---------------|---------------|---------------|
| 1    | H1    | -1.760648E-05 | 8.560261E-05  | -6.701883E-05 |
| 2    | C1    | 5.271573E-05  | 3.419554E-04  | 1.900027E-04  |
| 3    | C2    | 1.787746E-04  | -7.845456E-05 | -1.190407E-04 |
| 4    | C3    | 6.518965E-05  | 1.733524E-04  | 2.995630E-05  |
| 5    | C4    | 4.644568E-05  | -4.285227E-04 | -3.049115E-05 |
| 6    | C5    | 6.634166E-05  | -2.814561E-04 | -1.310787E-04 |
| 7    | C6    | -7.423502E-04 | 6.550684E-04  | -5.110122E-04 |
| 8    | C7    | -1.716607E-05 | 3.471987E-04  | 1.017501E-04  |
| 9    | H3    | -6.693003E-06 | 1.830384E-05  | -5.417540E-05 |
| 10   | H4    | 5.007075E-05  | 1.713780E-04  | -4.002857E-05 |
| 11   | H6    | 3.982523E-05  | -1.895296E-04 | 2.432835E-04  |
| 12   | C16   | -4.512237E-04 | 1.458137E-04  | 2.636271E-04  |
| 13   | C8    | 9.783325E-04  | -4.331398E-05 | -5.276414E-04 |
| 14   | N2    | 1.154174E-03  | 1.854764E-03  | 1.866304E-03  |
| 15   | C9    | -9.267920E-04 | 1.908471E-04  | -1.722730E-03 |
| 16   | C10   | 2.958805E-04  | -1.180492E-04 | 1.900029E-04  |
| 17   | O1    | 1.093448E-04  | -1.675687E-03 | 1.772626E-03  |

|       |       |               |               |               |
|-------|-------|---------------|---------------|---------------|
| 18    | C23   | -4.258359E-04 | 5.975215E-04  | -2.313616E-04 |
| 19    | C18   | 2.872440E-04  | -2.115962E-04 | -2.497649E-04 |
| 20    | C19   | -7.361272E-04 | 4.485692E-05  | -1.675212E-04 |
| 21    | C20   | -6.108905E-04 | 2.378031E-04  | -4.860949E-05 |
| 22    | C21   | 8.581520E-05  | 1.631371E-05  | -6.928251E-05 |
| 23    | C22   | 3.334914E-04  | -3.443841E-04 | -3.578032E-04 |
| 24    | H2    | 2.626736E-05  | 6.559719E-05  | 1.348223E-04  |
| 25    | H5    | 7.447752E-06  | 5.255091E-05  | 2.575070E-04  |
| 26    | H7    | 3.045907E-04  | 9.256212E-05  | 1.554336E-04  |
| 27    | H8    | 6.572394E-05  | 1.325668E-04  | 6.876751E-05  |
| 28    | H9    | 1.786449E-04  | -1.215854E-05 | -1.011479E-04 |
| 29    | H10   | -1.034819E-04 | -5.406367E-05 | -1.835043E-04 |
| 30    | H19   | 1.116160E-03  | -6.221536E-04 | -1.694702E-04 |
| 31    | H20   | -3.862103E-05 | 1.357032E-04  | -2.072739E-04 |
| 32    | H21   | -5.281330E-04 | -3.837875E-04 | 6.476345E-04  |
| 33    | H22   | -9.808506E-04 | 2.228886E-04  | 1.389144E-04  |
| 34    | H11   | -1.404782E-03 | 1.595679E-04  | -5.341847E-05 |
| 35    | H12   | 5.411857E-04  | 1.591068E-04  | -1.305233E-04 |
| 36    | H13   | 2.562304E-04  | -4.144697E-04 | -7.940476E-04 |
| ----- |       | -----         | -----         | -----         |
|       | total | -7.506569E-04 | 1.043696E-03  | 9.368552E-05  |

end of program derlb

start of program geopt 13

geometry optimization step 13

reading input hessian of dimension 108  
in five columns format  
reading input hessian of dimension 108  
in five columns format

Level shifts adjusted to satisfy step-size constraints

Step size: 0.0382024

Cos(theta): 0.6832886

Final level shift: -5.3874220E-02

energy change: -1.2400E-05 \* ( 5.0000E-05 )  
gradient maximum: 2.7846E-03 . ( 4.5000E-04 )  
gradient rms: 5.4966E-04 . ( 3.0000E-04 )  
step size: 0.03820 trust radius: 0.03750  
displacement maximum: 3.0584E-02 . ( 1.8000E-03 )  
displacement rms: 3.4587E-03 . ( 1.2000E-03 )  
predicted energy change: -1.1855E-04 geom step: 3.8202E-  
02 full step: 3.8202E-02  
molecular structure not yet converged...

center of mass moved by:

x: -2.0794E-03 y: -6.4346E-04 z: 1.2667E-03

new geometry:

|      | angstroms     |               |               |
|------|---------------|---------------|---------------|
| atom | x             | y             | z             |
| H1   | -1.1904634269 | 1.8837226586  | -2.2301003031 |
| C1   | -1.1066794715 | 2.1176325597  | -1.1824628321 |
| C2   | -0.8810637056 | 2.6928730351  | 1.5032217589  |
| C3   | -0.8871732520 | 1.0844565935  | -0.2870304827 |
| C4   | -1.2097167095 | 3.4319501345  | -0.7595507245 |
| C5   | -1.0951751997 | 3.7113830399  | 0.5896390562  |
| C6   | -0.7750429444 | 1.3739864102  | 1.0748917663  |
| C7   | -0.7915150688 | -0.3538389985 | -0.7571326878 |
| H3   | -1.3765166026 | 4.2202553935  | -1.4709659876 |
| H4   | -1.1757735044 | 4.7238488899  | 0.9432542388  |
| H6   | -0.8011706181 | 2.9354752763  | 2.5444911706  |
| C16  | 0.6110997752  | -0.7603359796 | -1.2086064807 |
| C8   | -1.4020646732 | -1.2508882800 | 0.3419389292  |
| N2   | -0.5250100481 | 0.3343881834  | 1.9983400319  |
| C9   | -0.7657120961 | -0.9851759177 | 1.6954678759  |
| C10  | 0.0107116338  | 0.6544599627  | 3.3120461746  |
| O1   | -0.5273943792 | -1.8679756046 | 2.4703267471  |
| C23  | -1.4030490625 | -2.7415451131 | 0.0191963902  |
| C18  | 3.1453048033  | -1.5693529684 | -2.0853806533 |
| C19  | 0.7644423991  | -1.4857045768 | -2.3849098559 |
| C20  | 1.7547124057  | -0.4376532471 | -0.4832782275 |
| C21  | 3.0072503180  | -0.8409531531 | -0.9149336996 |
| C22  | 2.0177736033  | -1.8887396774 | -2.8217172264 |
| H2   | -0.1037812055 | -1.7405520052 | -2.9690653621 |
| H5   | 1.6754693014  | 0.1393394224  | 0.4183051151  |
| H7   | 3.8767933085  | -0.5805596643 | -0.3368344740 |
| H8   | 2.1089405955  | -2.4489979326 | -3.7354247468 |
| H9   | 4.1198020745  | -1.8791540814 | -2.4195622865 |
| H10  | -1.4362030590 | -0.4549262882 | -1.6239612443 |
| H19  | -0.3960516381 | -3.1347837625 | -0.0355236699 |
| H20  | -1.8913092801 | -2.9137411212 | -0.9351824656 |
| H21  | -1.9333958063 | -3.2920159127 | 0.7849544149  |
| H22  | -2.4343857842 | -0.9175533592 | 0.4496051989  |
| H11  | 0.8942234781  | 1.2760870660  | 3.2109350826  |
| H12  | 0.2740813282  | -0.2687206992 | 3.7975013549  |
| H13  | -0.7243348673 | 1.1727815254  | 3.9195364042  |

nuclear repulsion energy..... 1415.678442617 hartrees

-----  
/ end of geometry optimization iteration 13 /  
-----

end of program geopt

start of program onee

smallest eigenvalue of S: 3.321E-04

number of canonical orbitals..... 368

S346

end of program onee

start of program probe

end of program probe

start of program grid

number of gridpoints:

|     | atom     | H1  | C1  | C2  | C3  | C4  | C5  | C6  |
|-----|----------|-----|-----|-----|-----|-----|-----|-----|
| C7  |          |     |     |     |     |     |     |     |
|     | grid # 1 | 72  | 87  | 89  | 90  | 89  | 87  | 83  |
| 81  |          |     |     |     |     |     |     |     |
|     | grid # 2 | 116 | 97  | 96  | 98  | 97  | 97  | 94  |
| 90  |          |     |     |     |     |     |     |     |
|     | grid # 3 | 217 | 182 | 184 | 195 | 183 | 184 | 189 |
| 176 |          |     |     |     |     |     |     |     |
|     | grid # 4 | 216 | 326 | 328 | 338 | 328 | 328 | 326 |
| 314 |          |     |     |     |     |     |     |     |

number of gridpoints:

|     | atom     | H3  | H4  | H6  | C16 | C8  | N2  | C9  |
|-----|----------|-----|-----|-----|-----|-----|-----|-----|
| C10 |          |     |     |     |     |     |     |     |
|     | grid # 1 | 73  | 73  | 71  | 92  | 82  | 96  | 82  |
| 68  |          |     |     |     |     |     |     |     |
|     | grid # 2 | 118 | 118 | 111 | 100 | 90  | 105 | 92  |
| 79  |          |     |     |     |     |     |     |     |
|     | grid # 3 | 223 | 223 | 206 | 194 | 174 | 211 | 176 |
| 149 |          |     |     |     |     |     |     |     |
|     | grid # 4 | 224 | 223 | 206 | 342 | 311 | 390 | 293 |
| 273 |          |     |     |     |     |     |     |     |

number of gridpoints:

|     | atom     | O1  | C23 | C18 | C19 | C20 | C21 | C22 |
|-----|----------|-----|-----|-----|-----|-----|-----|-----|
| H2  |          |     |     |     |     |     |     |     |
|     | grid # 1 | 111 | 74  | 89  | 88  | 88  | 89  | 89  |
| 71  |          |     |     |     |     |     |     |     |
|     | grid # 2 | 123 | 80  | 97  | 95  | 96  | 97  | 96  |
| 112 |          |     |     |     |     |     |     |     |
|     | grid # 3 | 256 | 147 | 183 | 182 | 182 | 184 | 183 |
| 212 |          |     |     |     |     |     |     |     |
|     | grid # 4 | 449 | 287 | 327 | 326 | 327 | 327 | 327 |
| 211 |          |     |     |     |     |     |     |     |

number of gridpoints:

|     | atom     | H5  | H7  | H8  | H9  | H10 | H19 | H20 |
|-----|----------|-----|-----|-----|-----|-----|-----|-----|
| H21 |          |     |     |     |     |     |     |     |
|     | grid # 1 | 71  | 73  | 73  | 73  | 66  | 70  | 71  |
| 70  |          |     |     |     |     |     |     |     |
|     | grid # 2 | 111 | 118 | 118 | 118 | 106 | 108 | 110 |
| 108 |          |     |     |     |     |     |     |     |

```

grid # 3      210    222    223    224    202    218    216
217
grid # 4      206    223    223    224    198    213    216
215

```

number of gridpoints:

| atom     | H22 | H11 | H12 | H13 | total |
|----------|-----|-----|-----|-----|-------|
| grid # 1 | 69  | 71  | 70  | 71  | 2862  |
| grid # 2 | 110 | 109 | 107 | 108 | 3725  |
| grid # 3 | 215 | 215 | 213 | 214 | 7184  |
| grid # 4 | 212 | 215 | 209 | 215 | 9916  |

end of program grid

```

start of program rwr
recomputing RWR matrix 14    grid: 4
end of program rwr

```

start of program scf

|      | i | u | d | i | g |                  | RMS      | maximum |
|------|---|---|---|---|---|------------------|----------|---------|
|      | t | p | i | c | r |                  | energy   | DIIS    |
|      | e | d | i | u | i | total energy     | density  | error   |
|      | r | t | s | t | d | change           | change   |         |
| etot | 1 | N | N | 1 | U | -783.03273740497 | 4.5E-05  | 1.6E-03 |
| etot | 2 | Y | Y | 4 | M | -783.03306942744 | 3.3E-04  | 3.8E-04 |
| etot | 3 | Y | Y | 4 | M | -783.03311108439 | 4.2E-05  | 7.3E-05 |
| etot | 4 | Y | Y | 4 | M | -783.03311138989 | 3.1E-07  | 3.3E-05 |
| etot | 5 | Y | N | 4 | M | -783.03311113761 | -2.5E-07 | 0.0E+00 |

Energy components, in hartrees:

|     |                               |                   |       |
|-----|-------------------------------|-------------------|-------|
| (A) | Nuclear repulsion.....        | 1415.67844261724  |       |
| (E) | Total one-electron terms..... | -3875.92480501097 |       |
| (I) | Total two-electron terms..... | 1677.21325125612  |       |
| (L) | Electronic energy.....        | -2198.71155375485 | (E+I) |
| (N) | Total energy.....             | -783.03311113761  | (A+L) |

```

SCFE: SCF energy: HF    -783.03311113761 hartrees    iterations:
5

```

```

HOMO energy:    -0.30211
LUMO energy:     0.12921

```

Orbital energies:

|           |           |           |           |           |           |
|-----------|-----------|-----------|-----------|-----------|-----------|
| -20.52717 | -15.60035 | -11.34636 | -11.28589 | -11.25634 | -11.24997 |
| -11.24275 | -11.24143 | -11.24051 | -11.23834 | -11.23769 | -11.23467 |
| -11.23125 | -11.23043 | -11.22988 | -11.22966 | -11.22845 | -11.22764 |



|           |          |          |          |          |          |
|-----------|----------|----------|----------|----------|----------|
| -11.20897 | -1.39751 | -1.26976 | -1.16525 | -1.14909 | -1.10624 |
| -1.03008  | -1.01880 | -1.01795 | -1.01258 | -0.96252 | -0.93273 |
| -0.85804  | -0.83878 | -0.83332 | -0.82164 | -0.79618 | -0.74109 |
| -0.71130  | -0.69493 | -0.67339 | -0.66427 | -0.64427 | -0.63813 |
| -0.62740  | -0.61458 | -0.61219 | -0.60914 | -0.59731 | -0.58318 |
| -0.57653  | -0.55282 | -0.54847 | -0.54039 | -0.53167 | -0.51866 |
| -0.51517  | -0.50733 | -0.50081 | -0.49797 | -0.48478 | -0.46847 |
| -0.46300  | -0.42185 | -0.41134 | -0.34259 | -0.33276 | -0.32300 |
| -0.30211  | 0.12921  | 0.13422  | 0.14434  | 0.15237  | 0.20408  |
| 0.22986   | 0.24113  | 0.24685  | 0.26155  | 0.28691  |          |

end of program scf

start of program derla  
end of program derla

start of program rwr  
recomputing RWR matrix 14 grid: 4  
end of program rwr

start of program der1b

forces (hartrees/bohr) : total

| atom | label | x             | y             | z             |
|------|-------|---------------|---------------|---------------|
| 1    | H1    | -1.288750E-05 | 5.435393E-05  | -6.915185E-05 |
| 2    | C1    | -1.270972E-05 | -1.134496E-04 | -1.280113E-04 |
| 3    | C2    | 4.565041E-05  | 4.981301E-04  | 3.118425E-04  |
| 4    | C3    | 1.487194E-04  | -4.333749E-04 | -1.962242E-04 |
| 5    | C4    | 2.397646E-05  | 2.543932E-04  | 8.592366E-05  |
| 6    | C5    | -5.366383E-05 | 1.385670E-04  | -1.135148E-04 |
| 7    | C6    | -5.265661E-05 | -3.668020E-04 | -2.917251E-04 |
| 8    | C7    | -2.753107E-04 | 4.718202E-04  | -1.400342E-04 |
| 9    | H3    | -5.995114E-05 | 1.807294E-04  | -1.303336E-04 |
| 10   | H4    | 4.300328E-06  | 2.983533E-04  | -5.010494E-06 |
| 11   | H6    | -5.249997E-05 | -1.574786E-05 | 2.183351E-04  |
| 12   | C16   | -5.141156E-04 | -2.141040E-04 | 1.718746E-04  |
| 13   | C8    | 1.184320E-03  | -2.917670E-04 | -3.319124E-04 |
| 14   | N2    | 2.374977E-04  | -9.499686E-04 | -1.034592E-03 |
| 15   | C9    | -6.852148E-04 | 6.227286E-04  | 3.211726E-04  |
| 16   | C10   | 8.154959E-05  | -3.220034E-04 | 4.358483E-04  |
| 17   | O1    | 9.856838E-05  | 6.828377E-04  | 4.590541E-04  |
| 18   | C23   | 5.483586E-05  | -6.243503E-05 | 1.679071E-04  |
| 19   | C18   | 5.125608E-05  | -2.397895E-04 | -3.112421E-04 |
| 20   | C19   | 3.185482E-04  | -2.742615E-04 | -5.551371E-04 |
| 21   | C20   | 3.893206E-04  | 5.978390E-05  | -1.267247E-04 |
| 22   | C21   | -2.013638E-05 | 5.396529E-04  | 6.565319E-04  |
| 23   | C22   | -7.003743E-04 | 9.383821E-05  | 1.547313E-05  |

|       |       |               |               |               |
|-------|-------|---------------|---------------|---------------|
| 24    | H2    | 1.239858E-04  | 3.028446E-05  | 9.172571E-05  |
| 25    | H5    | -5.439934E-05 | 2.939706E-04  | 4.992185E-04  |
| 26    | H7    | -1.055380E-04 | -2.416848E-05 | 1.226004E-05  |
| 27    | H8    | 1.340910E-05  | -1.325221E-04 | -3.019458E-04 |
| 28    | H9    | -3.966028E-05 | -3.653435E-05 | -1.234830E-04 |
| 29    | H10   | -4.547557E-06 | -5.203934E-05 | 2.814139E-05  |
| 30    | H19   | -1.427059E-04 | 1.767826E-04  | 5.390872E-05  |
| 31    | H20   | -2.639856E-04 | -8.393821E-05 | -1.216691E-04 |
| 32    | H21   | 2.329057E-06  | 4.590352E-05  | -2.741300E-04 |
| 33    | H22   | -4.149231E-04 | -1.137037E-04 | 4.075030E-05  |
| 34    | H11   | -9.815653E-04 | 4.681995E-04  | 4.081034E-04  |
| 35    | H12   | 2.766771E-04  | 2.730712E-05  | 1.832352E-04  |
| 36    | H13   | 6.995641E-04  | -2.175200E-04 | 1.303651E-04  |
| ----- |       | -----         | -----         | -----         |
|       | total | -6.923372E-04 | 9.935064E-04  | 3.682982E-05  |

end of program derlb

start of program geopt 14

geometry optimization step 14

reading input hessian of dimension 108

in five columns format

reading input hessian of dimension 108

in five columns format

Level shifts adjusted to satisfy step-size constraints

Step size: 0.0532970

Cos(theta): 0.5424329

Final level shift: -1.3850867E-02

energy change: -1.2725E-04 . ( 5.0000E-05 )

gradient maximum: 2.2112E-03 . ( 4.5000E-04 )

gradient rms: 4.5911E-04 . ( 3.0000E-04 )

step size: 0.05330 trust radius: 0.05303

displacement maximum: 3.6294E-02 . ( 1.8000E-03 )

displacement rms: 4.8253E-03 . ( 1.2000E-03 )

predicted energy change: -9.2975E-05 geom step: 5.3297E-

02 full step: 5.3297E-02

molecular structure not yet converged...

center of mass moved by:

x: -4.6025E-04 y: 8.9880E-04 z: -1.6727E-04

new geometry:

|      | angstroms     |              |               |
|------|---------------|--------------|---------------|
| atom | x             | y            | z             |
| H1   | -1.1858989172 | 1.8823953805 | -2.2310924871 |
| C1   | -1.1023287096 | 2.1168824745 | -1.1835552384 |

S350

|     |               |               |               |
|-----|---------------|---------------|---------------|
| C2  | -0.8773798085 | 2.6943939687  | 1.5020790536  |
| C3  | -0.8840206516 | 1.0838274937  | -0.2876189269 |
| C4  | -1.2042939816 | 3.4322158226  | -0.7612013423 |
| C5  | -1.0905585672 | 3.7127858525  | 0.5878667040  |
| C6  | -0.7716397891 | 1.3747586685  | 1.0739641827  |
| C7  | -0.7902839075 | -0.3548906256 | -0.7556504696 |
| H3  | -1.3700271509 | 4.2201565258  | -1.4733146737 |
| H4  | -1.1712036334 | 4.7254640514  | 0.9408797336  |
| H6  | -0.7994968457 | 2.9369832158  | 2.5437009976  |
| C16 | 0.6110259546  | -0.7620976269 | -1.2107522565 |
| C8  | -1.3966602281 | -1.2530459526 | 0.3446899500  |
| N2  | -0.5221651567 | 0.3364287147  | 1.9968230459  |
| C9  | -0.7694338271 | -0.9813103157 | 1.7008613088  |
| C10 | -0.0014152885 | 0.6589938398  | 3.3174960385  |
| O1  | -0.5416740212 | -1.8596146994 | 2.4828095174  |
| C23 | -1.3885418188 | -2.7431231756 | 0.0237272218  |
| C18 | 3.1400549411  | -1.5746414088 | -2.0925981320 |
| C19 | 0.7612605210  | -1.4781901303 | -2.3930788802 |
| C20 | 1.7557691226  | -0.4489899506 | -0.4817015512 |
| C21 | 3.0058965006  | -0.8545112205 | -0.9159042848 |
| C22 | 2.0119544179  | -1.8827459131 | -2.8327424430 |
| H2  | -0.1079787112 | -1.7247145015 | -2.9791904316 |
| H5  | 1.6773566881  | 0.1217716771  | 0.4242774659  |
| H7  | 3.8759489061  | -0.6040610218 | -0.3353159423 |
| H8  | 2.1008536305  | -2.4366608209 | -3.7513274715 |
| H9  | 4.1127893494  | -1.8871192353 | -2.4290017664 |
| H10 | -1.4376049413 | -0.4566641571 | -1.6200998946 |
| H19 | -0.3802975746 | -3.1266325886 | -0.0336465554 |
| H20 | -1.8791974112 | -2.9213328011 | -0.9282401910 |
| H21 | -1.9103793939 | -3.2962390061 | 0.7910739813  |
| H22 | -2.4301103554 | -0.9268715573 | 0.4485818357  |
| H11 | 0.8559083364  | 1.3180954556  | 3.2271318241  |
| H12 | 0.2957714252  | -0.2599166806 | 3.7909355993  |
| H13 | -0.7556085247 | 1.1405696510  | 3.9343492359  |

nuclear repulsion energy..... 1415.640840664 hartrees

-----  
 / end of geometry optimization iteration 14 /  
 -----

end of program geopt

start of program onee  
 smallest eigenvalue of S: 3.327E-04  
 number of canonical orbitals..... 368  
 end of program onee

start of program probe  
 end of program probe

start of program grid

number of gridpoints:

| atom     | H1  | C1  | C2  | C3  | C4  | C5  | C6  |
|----------|-----|-----|-----|-----|-----|-----|-----|
| C7       |     |     |     |     |     |     |     |
| grid # 1 | 72  | 87  | 89  | 89  | 89  | 87  | 83  |
| 81       |     |     |     |     |     |     |     |
| grid # 2 | 116 | 97  | 96  | 98  | 97  | 97  | 95  |
| 90       |     |     |     |     |     |     |     |
| grid # 3 | 217 | 182 | 184 | 194 | 183 | 184 | 189 |
| 177      |     |     |     |     |     |     |     |
| grid # 4 | 216 | 326 | 328 | 338 | 328 | 328 | 326 |
| 314      |     |     |     |     |     |     |     |

number of gridpoints:

| atom     | H3  | H4  | H6  | C16 | C8  | N2  | C9  |
|----------|-----|-----|-----|-----|-----|-----|-----|
| C10      |     |     |     |     |     |     |     |
| grid # 1 | 73  | 73  | 71  | 92  | 82  | 95  | 82  |
| 69       |     |     |     |     |     |     |     |
| grid # 2 | 118 | 118 | 111 | 100 | 90  | 104 | 92  |
| 78       |     |     |     |     |     |     |     |
| grid # 3 | 224 | 223 | 207 | 194 | 175 | 211 | 176 |
| 147      |     |     |     |     |     |     |     |
| grid # 4 | 224 | 223 | 207 | 342 | 311 | 389 | 292 |
| 274      |     |     |     |     |     |     |     |

number of gridpoints:

| atom     | O1  | C23 | C18 | C19 | C20 | C21 | C22 |
|----------|-----|-----|-----|-----|-----|-----|-----|
| H2       |     |     |     |     |     |     |     |
| grid # 1 | 111 | 73  | 89  | 88  | 88  | 89  | 89  |
| 71       |     |     |     |     |     |     |     |
| grid # 2 | 123 | 80  | 97  | 95  | 96  | 97  | 96  |
| 112      |     |     |     |     |     |     |     |
| grid # 3 | 256 | 147 | 183 | 183 | 182 | 184 | 183 |
| 212      |     |     |     |     |     |     |     |
| grid # 4 | 449 | 286 | 327 | 326 | 327 | 327 | 327 |
| 211      |     |     |     |     |     |     |     |

number of gridpoints:

| atom     | H5  | H7  | H8  | H9  | H10 | H19 | H20 |
|----------|-----|-----|-----|-----|-----|-----|-----|
| H21      |     |     |     |     |     |     |     |
| grid # 1 | 71  | 73  | 73  | 73  | 66  | 71  | 71  |
| 70       |     |     |     |     |     |     |     |
| grid # 2 | 111 | 118 | 118 | 118 | 106 | 108 | 110 |
| 108      |     |     |     |     |     |     |     |
| grid # 3 | 212 | 223 | 223 | 224 | 203 | 217 | 217 |
| 217      |     |     |     |     |     |     |     |
| grid # 4 | 207 | 223 | 223 | 224 | 197 | 212 | 216 |
| 215      |     |     |     |     |     |     |     |

number of gridpoints:

| atom     | H22 | H11 | H12 | H13 | total |
|----------|-----|-----|-----|-----|-------|
| grid # 1 | 69  | 71  | 70  | 71  | 2861  |
| grid # 2 | 110 | 109 | 106 | 110 | 3725  |
| grid # 3 | 214 | 215 | 213 | 215 | 7190  |
| grid # 4 | 211 | 215 | 210 | 216 | 9915  |

end of program grid

start of program rwr  
end of program rwr

start of program scf

|      | i | u | d | i | g |                  | RMS     | maximum |
|------|---|---|---|---|---|------------------|---------|---------|
|      | t | p | i | c | r |                  | energy  | DIIS    |
|      | e | d | i | u | i | total energy     | density | error   |
|      | r | t | s | t | d |                  | change  |         |
| etot | 1 | N | N | 2 | U | -783.03251762479 | 8.2E-05 | 2.5E-03 |
| etot | 2 | Y | Y | 6 | M | -783.03322094333 | 7.0E-04 | 6.1E-04 |
| etot | 3 | Y | Y | 6 | M | -783.03330682578 | 8.6E-05 | 1.6E-04 |
| etot | 4 | Y | Y | 6 | M | -783.03330889700 | 2.1E-06 | 5.3E-05 |
| etot | 5 | Y | N | 6 | M | -783.03331126580 | 2.4E-06 | 0.0E+00 |

Energy components, in hartrees:

|     |                               |                   |       |
|-----|-------------------------------|-------------------|-------|
| (A) | Nuclear repulsion.....        | 1415.64084066438  |       |
| (E) | Total one-electron terms..... | -3875.84081947222 |       |
| (I) | Total two-electron terms..... | 1677.16666754204  |       |
| (L) | Electronic energy.....        | -2198.67415193018 | (E+I) |
| (N) | Total energy.....             | -783.03331126580  | (A+L) |

SCFE: SCF energy: HF -783.03331126580 hartrees iterations:

5

HOMO energy: -0.30193  
LUMO energy: 0.12912

Orbital energies:

|           |           |           |           |           |           |
|-----------|-----------|-----------|-----------|-----------|-----------|
| -20.52691 | -15.60058 | -11.34609 | -11.28593 | -11.25677 | -11.24985 |
| -11.24243 | -11.24137 | -11.24052 | -11.23840 | -11.23777 | -11.23467 |
| -11.23127 | -11.23042 | -11.22991 | -11.22959 | -11.22849 | -11.22766 |
| -11.20837 | -1.39820  | -1.27031  | -1.16527  | -1.14902  | -1.10636  |
| -1.03030  | -1.01862  | -1.01791  | -1.01289  | -0.96275  | -0.93289  |
| -0.85835  | -0.83921  | -0.83327  | -0.82167  | -0.79623  | -0.74135  |
| -0.71145  | -0.69500  | -0.67335  | -0.66438  | -0.64448  | -0.63795  |
| -0.62751  | -0.61474  | -0.61229  | -0.60897  | -0.59734  | -0.58353  |
| -0.57639  | -0.55300  | -0.54884  | -0.54058  | -0.53161  | -0.51903  |
| -0.51510  | -0.50742  | -0.50095  | -0.49792  | -0.48477  | -0.46865  |

|          |          |          |          |          |          |
|----------|----------|----------|----------|----------|----------|
| -0.46297 | -0.42198 | -0.41152 | -0.34258 | -0.33309 | -0.32282 |
| -0.30193 | 0.12912  | 0.13410  | 0.14454  | 0.15247  | 0.20423  |
| 0.22980  | 0.24117  | 0.24765  | 0.26149  | 0.28750  |          |

end of program scf

start of program derla  
end of program derla

start of program rwr  
end of program rwr

start of program derlb

forces (hartrees/bohr) : total

| atom | label | x             | y             | z             |
|------|-------|---------------|---------------|---------------|
| 1    | H1    | -3.524256E-05 | 1.065608E-04  | -8.120840E-05 |
| 2    | C1    | -1.002020E-05 | 3.536948E-04  | 7.481589E-05  |
| 3    | C2    | -1.246705E-04 | 2.741715E-04  | 1.067587E-04  |
| 4    | C3    | -2.346540E-05 | 6.013177E-05  | -4.006611E-05 |
| 5    | C4    | 6.148821E-05  | -2.181700E-04 | -1.361860E-04 |
| 6    | C5    | 7.361685E-06  | -1.880696E-04 | -1.392268E-04 |
| 7    | C6    | -2.890649E-04 | 6.032670E-04  | -7.223510E-04 |
| 8    | C7    | 1.925499E-04  | 2.263130E-04  | -1.239330E-04 |
| 9    | H3    | -6.383254E-05 | 1.447379E-04  | -1.380129E-04 |
| 10   | H4    | 1.439763E-05  | 2.894576E-04  | -2.049423E-05 |
| 11   | H6    | -8.258800E-05 | -8.554653E-05 | 7.233966E-05  |
| 12   | C16   | -4.568767E-04 | 1.211172E-04  | 3.127529E-04  |
| 13   | C8    | 1.134514E-03  | 3.578829E-05  | -7.197385E-04 |
| 14   | N2    | 9.350999E-04  | 7.759796E-04  | 1.405185E-03  |
| 15   | C9    | -5.854298E-04 | 2.937988E-04  | -1.249051E-03 |
| 16   | C10   | -3.839224E-04 | 3.042867E-04  | 5.791023E-04  |
| 17   | O1    | 2.105622E-04  | -9.250202E-04 | 1.534667E-03  |
| 18   | C23   | -5.711249E-04 | 4.756442E-04  | -3.453687E-04 |
| 19   | C18   | 3.256544E-04  | -1.428268E-04 | -2.072862E-04 |
| 20   | C19   | -4.958537E-04 | 6.243968E-05  | -1.122833E-04 |
| 21   | C20   | -6.533424E-04 | 1.096493E-04  | -2.835288E-04 |
| 22   | C21   | 3.706364E-07  | -1.379270E-05 | -8.482455E-05 |
| 23   | C22   | 1.820198E-04  | -3.416119E-04 | -3.971379E-04 |
| 24   | H2    | 4.408484E-05  | 3.570365E-05  | 1.189704E-04  |
| 25   | H5    | 2.520549E-05  | 1.364769E-04  | 3.601552E-04  |
| 26   | H7    | 3.248830E-04  | 1.129571E-04  | 1.503168E-04  |
| 27   | H8    | 7.971610E-05  | 1.472814E-04  | 1.381360E-04  |
| 28   | H9    | 1.202347E-04  | -1.293464E-05 | -9.138707E-05 |
| 29   | H10   | -5.248024E-05 | -1.111912E-04 | -1.734442E-04 |
| 30   | H19   | 1.333050E-03  | -6.121482E-04 | -1.539871E-04 |
| 31   | H20   | -1.589743E-04 | 6.037743E-05  | -2.377032E-04 |

|       |       |               |               |               |
|-------|-------|---------------|---------------|---------------|
| 32    | H21   | -6.397280E-04 | -4.778296E-04 | 6.001115E-04  |
| 33    | H22   | -1.475594E-03 | 2.933252E-04  | 1.798321E-04  |
| 34    | H11   | -1.004444E-03 | -2.923813E-04 | 1.362186E-04  |
| 35    | H12   | 5.549843E-04  | -3.498955E-05 | 2.177512E-04  |
| 36    | H13   | 8.037386E-04  | -4.785438E-04 | -7.619329E-04 |
| ----- |       | -----         | -----         | -----         |
|       | total | -7.567395E-04 | 1.088104E-03  | -2.320389E-04 |

end of program derlb

start of program geopt 15

geometry optimization step 15

reading input hessian of dimension 108  
in five columns format  
reading input hessian of dimension 108  
in five columns format

energy change: -2.0013E-04 . ( 5.0000E-05 )  
gradient maximum: 1.7505E-03 . ( 4.5000E-04 )  
gradient rms: 4.5754E-04 . ( 3.0000E-04 )  
step size: 0.08665 trust radius: 0.10607  
displacement maximum: 4.4982E-02 . ( 1.8000E-03 )  
displacement rms: 7.8450E-03 . ( 1.2000E-03 )  
predicted energy change: -7.7739E-05 geom step: 8.6650E-02  
full step: 8.6650E-02  
molecular structure not yet converged...

center of mass moved by:

x: -4.7965E-03 y: -4.8356E-04 z: 2.2999E-03

new geometry:

|      | angstroms     |               |               |
|------|---------------|---------------|---------------|
| atom | x             | y             | z             |
| H1   | -1.1947650016 | 1.8846951347  | -2.2330885775 |
| C1   | -1.1087416111 | 2.1179993868  | -1.1856597580 |
| C2   | -0.8787134484 | 2.6922588809  | 1.5006721766  |
| C3   | -0.8846920120 | 1.0848907600  | -0.2913257755 |
| C4   | -1.2133860416 | 3.4317947326  | -0.7613572263 |
| C5   | -1.0975293825 | 3.7108456748  | 0.5880048523  |
| C6   | -0.7687767697 | 1.3745596098  | 1.0700894203  |
| C7   | -0.7893167406 | -0.3546127641 | -0.7582648748 |
| H3   | -1.3836003561 | 4.2205567876  | -1.4717710497 |
| H4   | -1.1811327300 | 4.7229998441  | 0.9422492244  |
| H6   | -0.7989811603 | 2.9311513680  | 2.5428786033  |
| C16  | 0.6134578700  | -0.7634358285 | -1.2074962212 |
| C8   | -1.4032877799 | -1.2498338118 | 0.3409889096  |
| N2   | -0.5078409029 | 0.3357566671  | 1.9919926211  |
| C9   | -0.7807122882 | -0.9807390908 | 1.7005554219  |
| C10  | 0.0363180228  | 0.6576292576  | 3.2987926101  |

S355

|     |               |               |               |
|-----|---------------|---------------|---------------|
| O1  | -0.5743741091 | -1.8598938873 | 2.4887626630  |
| C23 | -1.3997664177 | -2.7421100708 | 0.0222447399  |
| C18 | 3.1484722001  | -1.5723422298 | -2.0830281511 |
| C19 | 0.7694595113  | -1.4735735464 | -2.3922512805 |
| C20 | 1.7550676876  | -0.4563967549 | -0.4724310966 |
| C21 | 3.0078739799  | -0.8583779813 | -0.9041994549 |
| C22 | 2.0229502197  | -1.8779138473 | -2.8278423723 |
| H2  | -0.0969454377 | -1.7159769702 | -2.9839038874 |
| H5  | 1.6744376545  | 0.1064845295  | 0.4378534042  |
| H7  | 3.8757890200  | -0.6084339448 | -0.3196830722 |
| H8  | 2.1157494955  | -2.4289756257 | -3.7466138553 |
| H9  | 4.1231766981  | -1.8822373567 | -2.4164187747 |
| H10 | -1.4326628505 | -0.4568257177 | -1.6259204194 |
| H19 | -0.3906823217 | -3.1437814798 | 0.0078673786  |
| H20 | -1.8525325938 | -2.9112697222 | -0.9506604585 |
| H21 | -1.9632378318 | -3.2882310144 | 0.7703686903  |
| H22 | -2.4377402215 | -0.9173243063 | 0.4398843384  |
| H11 | 0.8651469715  | 1.3471861789  | 3.1895865438  |
| H12 | 0.3804648060  | -0.2531034612 | 3.7575719169  |
| H13 | -0.7211811637 | 1.1081418111  | 3.9329544075  |

nuclear repulsion energy..... 1415.483964889 hartrees

-----  
 / end of geometry optimization iteration 15 /  
 -----

end of program geopt

start of program onee  
 smallest eigenvalue of S: 3.326E-04  
 number of canonical orbitals..... 368  
 end of program onee

start of program probe  
 end of program probe

start of program grid

number of gridpoints:

| atom     | H1  | C1  | C2  | C3  | C4  | C5  | C6  |
|----------|-----|-----|-----|-----|-----|-----|-----|
| C7       |     |     |     |     |     |     |     |
| grid # 1 | 72  | 87  | 89  | 89  | 89  | 87  | 84  |
| 81       |     |     |     |     |     |     |     |
| grid # 2 | 116 | 97  | 96  | 98  | 97  | 97  | 94  |
| 90       |     |     |     |     |     |     |     |
| grid # 3 | 217 | 182 | 184 | 195 | 183 | 184 | 189 |
| 176      |     |     |     |     |     |     |     |
| grid # 4 | 216 | 326 | 328 | 338 | 328 | 328 | 323 |
| 314      |     |     |     |     |     |     |     |



| number of gridpoints: |          |     |     |     |     |     |     |     |
|-----------------------|----------|-----|-----|-----|-----|-----|-----|-----|
|                       | atom     | H3  | H4  | H6  | C16 | C8  | N2  | C9  |
| C10                   |          |     |     |     |     |     |     |     |
| 69                    | grid # 1 | 73  | 73  | 70  | 92  | 82  | 96  | 82  |
| 78                    | grid # 2 | 118 | 118 | 111 | 100 | 90  | 106 | 92  |
| 147                   | grid # 3 | 224 | 223 | 207 | 194 | 173 | 210 | 176 |
| 274                   | grid # 4 | 224 | 223 | 207 | 342 | 310 | 388 | 294 |

| number of gridpoints: |          |     |     |     |     |     |     |     |
|-----------------------|----------|-----|-----|-----|-----|-----|-----|-----|
|                       | atom     | O1  | C23 | C18 | C19 | C20 | C21 | C22 |
| H2                    |          |     |     |     |     |     |     |     |
| 71                    | grid # 1 | 111 | 71  | 89  | 88  | 88  | 89  | 89  |
| 112                   | grid # 2 | 123 | 79  | 97  | 95  | 96  | 97  | 96  |
| 212                   | grid # 3 | 257 | 152 | 183 | 182 | 182 | 184 | 183 |
| 211                   | grid # 4 | 450 | 290 | 327 | 326 | 327 | 327 | 327 |

| number of gridpoints: |          |     |     |     |     |     |     |     |
|-----------------------|----------|-----|-----|-----|-----|-----|-----|-----|
|                       | atom     | H5  | H7  | H8  | H9  | H10 | H19 | H20 |
| H21                   |          |     |     |     |     |     |     |     |
| 70                    | grid # 1 | 71  | 73  | 73  | 73  | 66  | 70  | 71  |
| 108                   | grid # 2 | 111 | 118 | 118 | 118 | 106 | 108 | 110 |
| 217                   | grid # 3 | 212 | 222 | 223 | 224 | 202 | 218 | 216 |
| 217                   | grid # 4 | 207 | 223 | 223 | 224 | 198 | 216 | 217 |

| number of gridpoints: |          |     |     |     |     |       |
|-----------------------|----------|-----|-----|-----|-----|-------|
|                       | atom     | H22 | H11 | H12 | H13 | total |
|                       | grid # 1 | 69  | 71  | 70  | 71  | 2859  |
|                       | grid # 2 | 110 | 109 | 107 | 111 | 3727  |
|                       | grid # 3 | 215 | 214 | 213 | 215 | 7190  |
|                       | grid # 4 | 212 | 211 | 209 | 216 | 9921  |

end of program grid

start of program rwr  
end of program rwr

start of program scf

|      | i | u | d | i | g |                  | RMS     | maximum |
|------|---|---|---|---|---|------------------|---------|---------|
|      | t | p | i | c | r |                  | energy  | DIIS    |
|      | e | d | i | u | i | total energy     | density | error   |
|      | r | t | s | t | d |                  | change  |         |
| etot | 1 | N | N | 2 | U | -783.03161533907 | 9.0E-05 | 2.4E-03 |
| etot | 2 | Y | Y | 6 | M | -783.03309043745 | 1.5E-03 | 6.7E-04 |
| etot | 3 | Y | Y | 6 | M | -783.03326038684 | 1.7E-04 | 1.3E-04 |
| etot | 4 | Y | Y | 6 | M | -783.03326773551 | 7.3E-06 | 6.6E-05 |
| etot | 5 | Y | N | 6 | M | -783.03326817214 | 4.4E-07 | 0.0E+00 |

Energy components, in hartrees:

|     |                               |                   |       |
|-----|-------------------------------|-------------------|-------|
| (A) | Nuclear repulsion.....        | 1415.48396488863  |       |
| (E) | Total one-electron terms..... | -3875.52541748963 |       |
| (I) | Total two-electron terms..... | 1677.00818442886  |       |
| (L) | Electronic energy.....        | -2198.51723306077 | (E+I) |
| (N) | Total energy.....             | -783.03326817214  | (A+L) |

SCFE: SCF energy: HF -783.03326817214 hartrees iterations:  
5

HOMO energy: -0.30229  
LUMO energy: 0.12914

Orbital energies:

|           |           |           |           |           |           |
|-----------|-----------|-----------|-----------|-----------|-----------|
| -20.52702 | -15.60027 | -11.34640 | -11.28583 | -11.25665 | -11.25004 |
| -11.24314 | -11.24163 | -11.24052 | -11.23853 | -11.23785 | -11.23484 |
| -11.23125 | -11.23045 | -11.23011 | -11.22964 | -11.22847 | -11.22760 |
| -11.21011 | -1.39730  | -1.27012  | -1.16533  | -1.14926  | -1.10618  |
| -1.02997  | -1.01891  | -1.01815  | -1.01268  | -0.96285  | -0.93251  |
| -0.85795  | -0.83875  | -0.83343  | -0.82178  | -0.79625  | -0.74117  |
| -0.71123  | -0.69516  | -0.67309  | -0.66439  | -0.64470  | -0.63804  |
| -0.62741  | -0.61499  | -0.61246  | -0.60880  | -0.59753  | -0.58321  |
| -0.57644  | -0.55346  | -0.54873  | -0.54033  | -0.53117  | -0.51881  |
| -0.51521  | -0.50715  | -0.50107  | -0.49810  | -0.48474  | -0.46850  |
| -0.46296  | -0.42137  | -0.41143  | -0.34267  | -0.33290  | -0.32324  |
| -0.30229  | 0.12914   | 0.13395   | 0.14463   | 0.15254   | 0.20366   |
| 0.22918   | 0.24097   | 0.24745   | 0.26140   | 0.28684   |           |

end of program scf

start of program derla  
end of program derla

start of program rwr  
end of program rwr

start of program der1b

forces (hartrees/bohr) : total

| atom  | label | x             | y             | z             |
|-------|-------|---------------|---------------|---------------|
| 1     | H1    | -3.060099E-05 | 3.708702E-05  | -2.018024E-04 |
| 2     | C1    | -4.311779E-05 | -2.841001E-04 | -5.547012E-05 |
| 3     | C2    | -1.113699E-04 | 3.844960E-04  | -3.879661E-05 |
| 4     | C3    | 1.529154E-04  | -6.530408E-04 | 1.003069E-04  |
| 5     | C4    | -5.784681E-06 | 4.597214E-04  | 2.375900E-04  |
| 6     | C5    | -6.483505E-05 | 2.557698E-04  | -1.597196E-05 |
| 7     | C6    | 5.383050E-04  | -1.062592E-04 | -5.595230E-05 |
| 8     | C7    | 4.348823E-05  | 2.598916E-04  | -7.173185E-05 |
| 9     | H3    | -2.164322E-05 | 5.967583E-05  | -5.931434E-05 |
| 10    | H4    | 1.982270E-05  | 2.157185E-04  | -4.382692E-05 |
| 11    | H6    | -1.841104E-04 | 2.547983E-04  | 1.830271E-04  |
| 12    | C16   | -6.266728E-04 | -2.618815E-05 | 3.097450E-04  |
| 13    | C8    | 4.527106E-04  | 2.936681E-04  | -2.955051E-04 |
| 14    | N2    | -7.106531E-04 | -2.465873E-03 | -4.131084E-03 |
| 15    | C9    | 4.788254E-05  | 1.028947E-03  | 7.484797E-04  |
| 16    | C10   | -9.073112E-04 | 4.252671E-04  | 1.611055E-03  |
| 17    | O1    | 4.333538E-04  | 9.887816E-04  | 5.242424E-04  |
| 18    | C23   | 1.198317E-03  | -1.220785E-03 | 8.994733E-04  |
| 19    | C18   | 2.659446E-05  | -3.318956E-04 | -3.791696E-04 |
| 20    | C19   | 3.462801E-04  | -4.931917E-04 | -6.328651E-04 |
| 21    | C20   | 6.884813E-04  | 1.563060E-04  | 7.072406E-05  |
| 22    | C21   | -1.662681E-04 | 5.812758E-04  | 7.013171E-04  |
| 23    | C22   | -7.373702E-04 | 1.394381E-04  | 1.009011E-04  |
| 24    | H2    | -9.917171E-06 | -9.172417E-05 | -4.217731E-05 |
| 25    | H5    | -9.875964E-05 | 4.064711E-04  | 4.152519E-04  |
| 26    | H7    | 7.159916E-05  | -2.086328E-06 | 2.214453E-04  |
| 27    | H8    | -8.883540E-06 | -1.398107E-04 | -5.794112E-04 |
| 28    | H9    | -2.205235E-05 | -4.751086E-05 | -1.550688E-04 |
| 29    | H10   | -2.087770E-05 | -5.904105E-05 | 3.611627E-06  |
| 30    | H19   | -2.512526E-03 | 1.359009E-03  | -2.015217E-04 |
| 31    | H20   | -1.071527E-04 | -4.546762E-04 | 4.436451E-04  |
| 32    | H21   | 8.155298E-04  | 7.496449E-04  | -1.389169E-03 |
| 33    | H22   | -1.009438E-05 | -4.959373E-04 | -2.913758E-05 |
| 34    | H11   | -2.132448E-04 | 1.610149E-04  | 5.109761E-04  |
| 35    | H12   | -1.745427E-04 | -8.165475E-05 | 1.852349E-06  |
| 36    | H13   | 1.207053E-03  | -1.820410E-04 | 1.163118E-03  |
| total |       | -7.454553E-04 | 1.081166E-03  | -1.312139E-04 |

end of program der1b

start of program geopt 16

geometry optimization step 16

reading input hessian of dimension 108  
in five columns format  
reading input hessian of dimension 108  
in five columns format  
\*\* restarting optimization from step 15 \*\*

Level shifts adjusted to satisfy step-size constraints  
Step size: 0.0531195  
Cos(theta): 0.4412467

Final level shift: -8.1156573E-03

energy change: 4.3094E-05 \* ( 5.0000E-05 )  
gradient maximum: 1.7505E-03 . ( 4.5000E-04 )  
gradient rms: 4.5754E-04 . ( 3.0000E-04 )  
step size: 0.05312 trust radius: 0.05303  
displacement maximum: 2.7120E-02 . ( 1.8000E-03 )  
displacement rms: 4.8092E-03 . ( 1.2000E-03 )  
predicted energy change: -7.0676E-05 geom step: 5.3119E-  
02 full step: 5.3119E-02  
molecular structure not yet converged...

center of mass moved by:  
x: -2.9837E-16 y: 6.2450E-17 z: -1.2490E-16

new geometry:

|      | angstroms     |               |               |
|------|---------------|---------------|---------------|
| atom | x             | y             | z             |
| H1   | -1.1918354972 | 1.8851439646  | -2.2311448599 |
| C1   | -1.1067318143 | 2.1183362401  | -1.1835425870 |
| C2   | -0.8792060913 | 2.6928433636  | 1.5028139846  |
| C3   | -0.8855034501 | 1.0847856018  | -0.2889095130 |
| C4   | -1.2098149278 | 3.4325475328  | -0.7597725072 |
| C5   | -1.0950547607 | 3.7116657231  | 0.5896242435  |
| C6   | -0.7709958352 | 1.3745005316  | 1.0727816603  |
| C7   | -0.7907781251 | -0.3544011243 | -0.7570474495 |
| H3   | -1.3779914135 | 4.2212665374  | -1.4706877572 |
| H4   | -1.1771194540 | 4.7241372853  | 0.9434529247  |
| H6   | -0.8008946019 | 2.9325991890  | 2.5449204145  |
| C16  | 0.6111714616  | -0.7629762330 | -1.2084682675 |
| C8   | -1.4028293727 | -1.2508155236 | 0.3422347949  |
| N2   | -0.5138162728 | 0.3351427840  | 1.9950237512  |
| C9   | -0.7772018313 | -0.9820928136 | 1.7006681560  |
| C10  | 0.0185526492  | 0.6557343718  | 3.3087592086  |
| O1   | -0.5628018410 | -1.8614977692 | 2.4864620596  |
| C23  | -1.3997187314 | -2.7428695130 | 0.0225933957  |
| C18  | 3.1448844348  | -1.5726637657 | -2.0866352002 |
| C19  | 0.7648229441  | -1.4810102200 | -2.3888740259 |
| C20  | 1.7544718645  | -0.4479391704 | -0.4794694902 |
| C21  | 3.0066768432  | -0.8508198363 | -0.9122519585 |
| C22  | 2.0176636311  | -1.8852177753 | -2.8260196663 |

|     |               |               |               |
|-----|---------------|---------------|---------------|
| H2  | -0.1029720049 | -1.7293142820 | -2.9758849564 |
| H5  | 1.6755312709  | 0.1223272367  | 0.4266605439  |
| H7  | 3.8760334472  | -0.5954840883 | -0.3319392705 |
| H8  | 2.1089427219  | -2.4410159997 | -3.7419681917 |
| H9  | 4.1191110472  | -1.8827663261 | -2.4212186301 |
| H10 | -1.4353734703 | -0.4563109657 | -1.6237184925 |
| H19 | -0.3907057866 | -3.1397667494 | -0.0101394135 |
| H20 | -1.8683647284 | -2.9143115262 | -0.9420969431 |
| H21 | -1.9483838333 | -3.2911924180 | 0.7787257918  |
| H22 | -2.4375056292 | -0.9192875464 | 0.4437870735  |
| H11 | 0.8575753176  | 1.3345383445  | 3.2085717012  |
| H12 | 0.3459123929  | -0.2581712247 | 3.7734700424  |
| H13 | -0.7393600084 | 1.1167054187  | 3.9344542823  |

nuclear repulsion energy..... 1415.353750309 hartrees

-----  
/ end of geometry optimization iteration 16 /  
-----

end of program geopt

start of program onee  
smallest eigenvalue of S: 3.328E-04  
number of canonical orbitals..... 368  
end of program onee

start of program probe  
end of program probe

start of program grid

number of gridpoints:

| atom     | H1  | C1  | C2  | C3  | C4  | C5  | C6  |
|----------|-----|-----|-----|-----|-----|-----|-----|
| C7       |     |     |     |     |     |     |     |
| grid # 1 | 72  | 87  | 89  | 89  | 89  | 87  | 84  |
| 81       |     |     |     |     |     |     |     |
| grid # 2 | 116 | 97  | 96  | 98  | 97  | 97  | 94  |
| 90       |     |     |     |     |     |     |     |
| grid # 3 | 217 | 182 | 184 | 195 | 183 | 184 | 189 |
| 176      |     |     |     |     |     |     |     |
| grid # 4 | 216 | 326 | 328 | 338 | 328 | 328 | 323 |
| 313      |     |     |     |     |     |     |     |

number of gridpoints:

| atom     | H3 | H4 | H6 | C16 | C8 | N2 | C9 |
|----------|----|----|----|-----|----|----|----|
| C10      |    |    |    |     |    |    |    |
| grid # 1 | 73 | 73 | 70 | 92  | 82 | 96 | 82 |
| 69       |    |    |    |     |    |    |    |

|     |          |     |     |     |     |     |     |     |
|-----|----------|-----|-----|-----|-----|-----|-----|-----|
| 78  | grid # 2 | 118 | 118 | 111 | 100 | 90  | 105 | 92  |
| 147 | grid # 3 | 224 | 223 | 207 | 194 | 173 | 210 | 176 |
| 274 | grid # 4 | 224 | 223 | 207 | 342 | 311 | 389 | 294 |

number of gridpoints:

|     |          |     |     |     |     |     |     |     |
|-----|----------|-----|-----|-----|-----|-----|-----|-----|
| H2  | atom     | O1  | C23 | C18 | C19 | C20 | C21 | C22 |
| 71  | grid # 1 | 111 | 73  | 89  | 88  | 88  | 89  | 89  |
| 112 | grid # 2 | 123 | 80  | 97  | 95  | 96  | 97  | 96  |
| 212 | grid # 3 | 256 | 150 | 183 | 182 | 182 | 184 | 183 |
| 211 | grid # 4 | 450 | 290 | 327 | 326 | 327 | 327 | 327 |

number of gridpoints:

|     |          |     |     |     |     |     |     |     |
|-----|----------|-----|-----|-----|-----|-----|-----|-----|
| H21 | atom     | H5  | H7  | H8  | H9  | H10 | H19 | H20 |
| 70  | grid # 1 | 71  | 73  | 73  | 73  | 67  | 70  | 71  |
| 108 | grid # 2 | 111 | 118 | 118 | 118 | 106 | 109 | 110 |
| 217 | grid # 3 | 211 | 222 | 223 | 224 | 202 | 218 | 216 |
| 216 | grid # 4 | 207 | 223 | 223 | 224 | 196 | 215 | 216 |

number of gridpoints:

|  |          |     |     |     |     |       |
|--|----------|-----|-----|-----|-----|-------|
|  | atom     | H22 | H11 | H12 | H13 | total |
|  | grid # 1 | 69  | 71  | 70  | 71  | 2862  |
|  | grid # 2 | 110 | 109 | 107 | 111 | 3728  |
|  | grid # 3 | 215 | 214 | 212 | 215 | 7185  |
|  | grid # 4 | 212 | 213 | 210 | 216 | 9920  |

end of program grid

start of program rwr  
end of program rwr

start of program scf

|   |   |   |   |   |              |         |         |
|---|---|---|---|---|--------------|---------|---------|
| i | u | d | i | g |              |         |         |
| t | p | i | c | r |              |         |         |
| e | d | i | u | i |              | RMS     | maximum |
| r | t | s | t | d | total energy | energy  | DIIS    |
|   |   |   |   |   | change       | density | error   |
|   |   |   |   |   |              | change  |         |

|      |   |   |   |   |   |                  |          |         |         |
|------|---|---|---|---|---|------------------|----------|---------|---------|
| etot | 1 | N | N | 1 | U | -783.03281706934 |          | 5.0E-05 | 1.4E-03 |
| etot | 2 | Y | Y | 4 | M | -783.03312427828 | 3.1E-04  | 1.9E-05 | 5.8E-04 |
| etot | 3 | Y | Y | 4 | M | -783.03316288335 | 3.9E-05  | 5.4E-06 | 1.4E-04 |
| etot | 4 | Y | Y | 4 | M | -783.03316539364 | 2.5E-06  | 1.4E-06 | 3.9E-05 |
| etot | 5 | Y | N | 4 | M | -783.03316407596 | -1.3E-06 | 0.0E+00 | 0.0E+00 |

Energy components, in hartrees:

|     |                               |                   |       |
|-----|-------------------------------|-------------------|-------|
| (A) | Nuclear repulsion.....        | 1415.35375030938  |       |
| (E) | Total one-electron terms..... | -3875.27441835414 |       |
| (I) | Total two-electron terms..... | 1676.88750396881  |       |
| (L) | Electronic energy.....        | -2198.38691438533 | (E+I) |
| (N) | Total energy.....             | -783.03316407596  | (A+L) |

SCFE: SCF energy: HF -783.03316407596 hartrees iterations:  
5

HOMO energy: -0.30213  
LUMO energy: 0.12924

Orbital energies:

|           |           |           |           |           |           |
|-----------|-----------|-----------|-----------|-----------|-----------|
| -20.52707 | -15.60020 | -11.34629 | -11.28584 | -11.25652 | -11.25000 |
| -11.24311 | -11.24157 | -11.24048 | -11.23852 | -11.23784 | -11.23476 |
| -11.23123 | -11.23035 | -11.23007 | -11.22964 | -11.22841 | -11.22751 |
| -11.20968 | -1.39733  | -1.26979  | -1.16525  | -1.14913  | -1.10610  |
| -1.02995  | -1.01878  | -1.01805  | -1.01260  | -0.96266  | -0.93258  |
| -0.85795  | -0.83875  | -0.83336  | -0.82170  | -0.79617  | -0.74108  |
| -0.71115  | -0.69504  | -0.67310  | -0.66427  | -0.64450  | -0.63793  |
| -0.62738  | -0.61482  | -0.61232  | -0.60880  | -0.59731  | -0.58316  |
| -0.57644  | -0.55320  | -0.54867  | -0.54041  | -0.53126  | -0.51874  |
| -0.51508  | -0.50717  | -0.50099  | -0.49797  | -0.48466  | -0.46850  |
| -0.46293  | -0.42148  | -0.41144  | -0.34262  | -0.33281  | -0.32311  |
| -0.30213  | 0.12924   | 0.13409   | 0.14454   | 0.15246   | 0.20386   |
| 0.22952   | 0.24093   | 0.24768   | 0.26140   | 0.28713   |           |

end of program scf

start of program derla  
end of program derla

start of program rwr  
end of program rwr

start of program derlb

forces (hartrees/bohr) : total

|      |       |   |   |   |
|------|-------|---|---|---|
| atom | label | x | y | z |
|------|-------|---|---|---|

|       |     |               |               |               |
|-------|-----|---------------|---------------|---------------|
| 1     | H1  | -2.076901E-05 | 2.725807E-05  | -1.228720E-04 |
| 2     | C1  | -5.423186E-05 | -1.729491E-04 | -8.691033E-05 |
| 3     | C2  | -1.289445E-04 | 2.879280E-04  | -4.350675E-05 |
| 4     | C3  | 1.646959E-04  | -4.729124E-04 | 5.380076E-05  |
| 5     | C4  | -1.950331E-06 | 2.805998E-04  | 2.022463E-04  |
| 6     | C5  | -6.353908E-05 | 1.930004E-04  | -4.295208E-05 |
| 7     | C6  | 4.111472E-04  | -1.519043E-04 | 1.292671E-06  |
| 8     | C7  | -1.199114E-04 | 2.088626E-04  | -7.096114E-05 |
| 9     | H3  | -1.733939E-05 | 5.333553E-05  | -4.289213E-05 |
| 10    | H4  | 8.980717E-06  | 1.512606E-04  | -2.857306E-05 |
| 11    | H6  | -9.930237E-05 | 1.531849E-04  | 1.835794E-04  |
| 12    | C16 | -4.761430E-04 | 4.800321E-06  | 2.702735E-04  |
| 13    | C8  | 4.171914E-04  | 6.556764E-05  | -1.226432E-04 |
| 14    | N2  | -3.654317E-04 | -1.685129E-03 | -2.606026E-03 |
| 15    | C9  | -2.346116E-04 | 6.838593E-04  | 4.703105E-04  |
| 16    | C10 | -4.320746E-04 | 2.530715E-04  | 8.913516E-04  |
| 17    | O1  | 2.084272E-04  | 8.071311E-04  | 3.461610E-04  |
| 18    | C23 | 7.889505E-04  | -6.377477E-04 | 4.817368E-04  |
| 19    | C18 | 4.065821E-05  | -2.771372E-04 | -3.579461E-04 |
| 20    | C19 | 2.773252E-04  | -3.657966E-04 | -5.634945E-04 |
| 21    | C20 | 6.175470E-04  | 2.045268E-04  | 1.886286E-04  |
| 22    | C21 | -4.261402E-05 | 5.302141E-04  | 7.127327E-04  |
| 23    | C22 | -6.735100E-04 | 1.901480E-04  | 1.651498E-04  |
| 24    | H2  | -3.931484E-05 | -7.049288E-05 | -6.962124E-05 |
| 25    | H5  | -8.499968E-05 | 2.469456E-04  | 3.083788E-04  |
| 26    | H7  | -1.678894E-05 | -9.138450E-06 | 1.410601E-04  |
| 27    | H8  | -2.266994E-05 | -2.188366E-04 | -5.946609E-04 |
| 28    | H9  | -1.935856E-05 | -3.802608E-05 | -1.345884E-04 |
| 29    | H10 | -4.593859E-05 | -9.718123E-07 | -2.735757E-05 |
| 30    | H19 | -1.645610E-03 | 8.687701E-04  | -2.585829E-06 |
| 31    | H20 | -1.278384E-04 | -2.684396E-04 | 1.942621E-04  |
| 32    | H21 | 5.471564E-04  | 5.037196E-04  | -8.970119E-04 |
| 33    | H22 | 1.637880E-04  | -4.152862E-04 | -7.264908E-06 |
| 34    | H11 | -3.232297E-04 | 1.945023E-04  | 3.963368E-04  |
| 35    | H12 | -9.372187E-05 | 5.768344E-05  | -1.361023E-04 |
| 36    | H13 | 7.823837E-04  | -1.474820E-04 | 7.571220E-04  |
| total |     | -7.215922E-04 | 1.034119E-03  | -1.935473E-04 |

end of program derlb

start of program geopt 17

geometry optimization step 17

reading input hessian of dimension 108  
in five columns format

reading input hessian of dimension 108  
in five columns format



Level shifts adjusted to satisfy step-size constraints

Step size: 0.0265807

Cos(theta): 0.7409701

Final level shift: -6.8506355E-02

energy change: 1.4719E-04 . ( 5.0000E-05 )

gradient maximum: 2.2248E-03 . ( 4.5000E-04 )

gradient rms: 5.5697E-04 . ( 3.0000E-04 )

step size: 0.02658 trust radius: 0.02652

displacement maximum: 1.0933E-02 . ( 1.8000E-03 )

displacement rms: 2.4065E-03 . ( 1.2000E-03 )

predicted energy change: -8.4783E-05 geom step: 2.6581E-

02 full step: 2.6581E-02

molecular structure not yet converged...

center of mass moved by:

x: 2.3817E-03 y: 1.2274E-03 z: -1.1433E-03

new geometry:

|      | angstroms     |               |               |
|------|---------------|---------------|---------------|
| atom | x             | y             | z             |
| H1   | -1.1898670125 | 1.8847814228  | -2.2312119782 |
| C1   | -1.1048480005 | 2.1182799966  | -1.1835504621 |
| C2   | -0.8792107212 | 2.6947980897  | 1.5025377048  |
| C3   | -0.8827653820 | 1.0849454487  | -0.2887521400 |
| C4   | -1.2089879760 | 3.4331824117  | -0.7602007013 |
| C5   | -1.0957139377 | 3.7132983564  | 0.5889335586  |
| C6   | -0.7682447348 | 1.3759218048  | 1.0725986528  |
| C7   | -0.7891365630 | -0.3542605682 | -0.7561911903 |
| H3   | -1.3775548433 | 4.2212046348  | -1.4717432801 |
| H4   | -1.1793645619 | 4.7258673145  | 0.9422053341  |
| H6   | -0.8034265487 | 2.9353933583  | 2.5448972832  |
| C16  | 0.6116893955  | -0.7637076923 | -1.2098042482 |
| C8   | -1.3978045847 | -1.2513065921 | 0.3442611398  |
| N2   | -0.5134715743 | 0.3366800036  | 1.9935604050  |
| C9   | -0.7743495947 | -0.9791894005 | 1.7027239833  |
| C10  | 0.0027490065  | 0.6561503639  | 3.3175421975  |
| O1   | -0.5582315656 | -1.8549797778 | 2.4912389243  |
| C23  | -1.3925212087 | -2.7422485199 | 0.0239800314  |
| C18  | 3.1402859060  | -1.5785644872 | -2.0922965546 |
| C19  | 0.7615386908  | -1.4807666283 | -2.3917699342 |
| C20  | 1.7568427781  | -0.4512066930 | -0.4810174519 |
| C21  | 3.0067390273  | -0.8575492804 | -0.9157727903 |
| C22  | 2.0116680474  | -1.8867295727 | -2.8315168956 |
| H2   | -0.1078201647 | -1.7272925271 | -2.9774653816 |
| H5   | 1.6791443781  | 0.1188975757  | 0.4256616758  |
| H7   | 3.8772712996  | -0.6070442980 | -0.3355749421 |
| H8   | 2.1002122184  | -2.4410169802 | -3.7497844214 |
| H9   | 4.1125970487  | -1.8917450250 | -2.4292892256 |
| H10  | -1.4355993333 | -0.4565516128 | -1.6212464322 |
| H19  | -0.3849360709 | -3.1307458989 | -0.0207071702 |

|     |               |               |               |
|-----|---------------|---------------|---------------|
| H20 | -1.8736487576 | -2.9188298705 | -0.9334269167 |
| H21 | -1.9267703492 | -3.2927445472 | 0.7851494854  |
| H22 | -2.4324876488 | -0.9244628370 | 0.4464388908  |
| H11 | 0.8360800064  | 1.3443455025  | 3.2328270212  |
| H12 | 0.3325143945  | -0.2588686433 | 3.7779313019  |
| H13 | -0.7615532962 | 1.1050320069  | 3.9458298010  |

nuclear repulsion energy..... 1415.297894215 hartrees

-----  
 / end of geometry optimization iteration 17 /  
 -----

end of program geopt

start of program onee  
 smallest eigenvalue of S: 3.331E-04  
 number of canonical orbitals..... 368  
 end of program onee

start of program probe  
 end of program probe

start of program grid

number of gridpoints:

| atom     | H1  | C1  | C2  | C3  | C4  | C5  | C6  |
|----------|-----|-----|-----|-----|-----|-----|-----|
| C7       |     |     |     |     |     |     |     |
| grid # 1 | 72  | 87  | 89  | 89  | 89  | 87  | 83  |
| 81       |     |     |     |     |     |     |     |
| grid # 2 | 116 | 97  | 96  | 98  | 97  | 97  | 95  |
| 90       |     |     |     |     |     |     |     |
| grid # 3 | 217 | 182 | 184 | 194 | 183 | 184 | 189 |
| 177      |     |     |     |     |     |     |     |
| grid # 4 | 216 | 326 | 328 | 338 | 328 | 328 | 325 |
| 314      |     |     |     |     |     |     |     |

number of gridpoints:

| atom     | H3  | H4  | H6  | C16 | C8  | N2  | C9  |
|----------|-----|-----|-----|-----|-----|-----|-----|
| C10      |     |     |     |     |     |     |     |
| grid # 1 | 73  | 73  | 71  | 92  | 82  | 95  | 82  |
| 69       |     |     |     |     |     |     |     |
| grid # 2 | 118 | 118 | 112 | 100 | 90  | 105 | 92  |
| 79       |     |     |     |     |     |     |     |
| grid # 3 | 223 | 223 | 207 | 194 | 174 | 211 | 176 |
| 145      |     |     |     |     |     |     |     |
| grid # 4 | 224 | 223 | 207 | 342 | 311 | 388 | 294 |
| 277      |     |     |     |     |     |     |     |

number of gridpoints:

| atom     | O1  | C23 | C18 | C19 | C20 | C21 | C22 |
|----------|-----|-----|-----|-----|-----|-----|-----|
| H2       |     |     |     |     |     |     |     |
| grid # 1 | 111 | 71  | 89  | 88  | 88  | 89  | 89  |
| 71       |     |     |     |     |     |     |     |
| grid # 2 | 123 | 79  | 97  | 95  | 96  | 97  | 96  |
| 112      |     |     |     |     |     |     |     |
| grid # 3 | 256 | 152 | 183 | 183 | 182 | 184 | 183 |
| 212      |     |     |     |     |     |     |     |
| grid # 4 | 449 | 288 | 327 | 326 | 327 | 327 | 327 |
| 211      |     |     |     |     |     |     |     |

number of gridpoints:

| atom     | H5  | H7  | H8  | H9  | H10 | H19 | H20 |
|----------|-----|-----|-----|-----|-----|-----|-----|
| H21      |     |     |     |     |     |     |     |
| grid # 1 | 71  | 73  | 73  | 73  | 66  | 71  | 71  |
| 70       |     |     |     |     |     |     |     |
| grid # 2 | 111 | 118 | 118 | 118 | 106 | 108 | 110 |
| 108      |     |     |     |     |     |     |     |
| grid # 3 | 212 | 223 | 223 | 224 | 202 | 218 | 217 |
| 217      |     |     |     |     |     |     |     |
| grid # 4 | 207 | 223 | 223 | 224 | 197 | 212 | 216 |
| 215      |     |     |     |     |     |     |     |

number of gridpoints:

| atom     | H22 | H11 | H12 | H13 | total |
|----------|-----|-----|-----|-----|-------|
| grid # 1 | 69  | 71  | 70  | 71  | 2859  |
| grid # 2 | 110 | 109 | 106 | 111 | 3728  |
| grid # 3 | 214 | 215 | 212 | 215 | 7190  |
| grid # 4 | 211 | 213 | 210 | 217 | 9919  |

end of program grid

start of program rwr

end of program rwr

start of program scf

|      | i | u | d | i | g |                  | RMS     | maximum |
|------|---|---|---|---|---|------------------|---------|---------|
|      | t | p | i | c | r |                  | energy  | DIIS    |
|      | e | d | i | u | i | total energy     | density | error   |
|      | r | t | s | t | d |                  | change  |         |
| etot | 1 | N | N | 1 | U | -783.03300183202 | 3.3E-05 | 1.3E-03 |
| etot | 2 | Y | Y | 4 | M | -783.03318587615 | 1.8E-04 | 3.4E-04 |
| etot | 3 | Y | Y | 4 | M | -783.03320331669 | 1.7E-05 | 6.2E-05 |
| etot | 4 | Y | N | 4 | M | -783.03320434631 | 1.0E-06 | 0.0E+00 |

Energy components, in hartrees:

(A) Nuclear repulsion..... 1415.29789421495

(E) Total one-electron terms..... -3875.16241680966  
(I) Total two-electron terms..... 1676.83131824839  
(L) Electronic energy..... -2198.33109856126 (E+I)  
(N) Total energy..... -783.03320434631 (A+L)

SCFE: SCF energy: HF -783.03320434631 hartrees iterations:

4

HOMO energy: -0.30197  
LUMO energy: 0.12921

Orbital energies:

|           |           |           |           |           |           |
|-----------|-----------|-----------|-----------|-----------|-----------|
| -20.52684 | -15.60050 | -11.34590 | -11.28604 | -11.25678 | -11.24987 |
| -11.24264 | -11.24147 | -11.24048 | -11.23849 | -11.23785 | -11.23492 |
| -11.23111 | -11.23050 | -11.22996 | -11.22944 | -11.22849 | -11.22768 |
| -11.20864 | -1.39792  | -1.26998  | -1.16512  | -1.14897  | -1.10614  |
| -1.03014  | -1.01860  | -1.01784  | -1.01281  | -0.96266  | -0.93281  |
| -0.85828  | -0.83916  | -0.83325  | -0.82164  | -0.79616  | -0.74127  |
| -0.71120  | -0.69498  | -0.67312  | -0.66430  | -0.64456  | -0.63769  |
| -0.62742  | -0.61478  | -0.61221  | -0.60866  | -0.59705  | -0.58341  |
| -0.57631  | -0.55306  | -0.54889  | -0.54060  | -0.53132  | -0.51912  |
| -0.51501  | -0.50728  | -0.50098  | -0.49785  | -0.48462  | -0.46862  |
| -0.46285  | -0.42179  | -0.41154  | -0.34254  | -0.33299  | -0.32282  |
| -0.30197  | 0.12921   | 0.13407   | 0.14466   | 0.15242   | 0.20419   |
| 0.22970   | 0.24107   | 0.24826   | 0.26133   | 0.28773   |           |

end of program scf

start of program derla  
end of program derla

start of program rwr  
end of program rwr

start of program derlb

forces (hartrees/bohr) : total

| atom | label | x             | y             | z             |
|------|-------|---------------|---------------|---------------|
| 1    | H1    | -2.749844E-05 | 5.927659E-05  | -5.814880E-05 |
| 2    | C1    | 6.598569E-06  | 2.269102E-04  | -1.976546E-05 |
| 3    | C2    | -4.731144E-05 | -8.456915E-05 | -7.424503E-05 |
| 4    | C3    | 6.844551E-05  | 1.050694E-04  | -3.747773E-05 |
| 5    | C4    | -1.899668E-05 | -2.254398E-04 | -1.838663E-04 |
| 6    | C5    | 6.886463E-05  | -1.041397E-04 | 1.057060E-04  |
| 7    | C6    | -3.347210E-04 | 6.361344E-04  | -3.336204E-04 |
| 8    | C7    | 8.620343E-05  | 1.500224E-04  | 1.421189E-04  |

S368

|       |       |               |               |               |
|-------|-------|---------------|---------------|---------------|
| 9     | H3    | -2.416687E-05 | 7.394918E-05  | -7.900144E-05 |
| 10    | H4    | 1.012906E-05  | 1.174894E-04  | -1.772366E-05 |
| 11    | H6    | -5.179638E-05 | -3.655656E-05 | 2.603832E-05  |
| 12    | C16   | -1.708505E-04 | 1.283013E-04  | 2.149589E-04  |
| 13    | C8    | 2.502808E-04  | 2.741050E-05  | -4.545473E-04 |
| 14    | N2    | 6.186347E-04  | 1.056552E-03  | 1.747326E-03  |
| 15    | C9    | -2.667254E-04 | -1.173440E-04 | -1.132280E-03 |
| 16    | C10   | -3.181214E-04 | 2.014716E-04  | 3.956910E-04  |
| 17    | O1    | -7.694118E-05 | -8.723296E-04 | 8.358388E-04  |
| 18    | C23   | -3.467583E-04 | 4.299200E-04  | -1.072602E-04 |
| 19    | C18   | 2.690961E-04  | 1.706250E-05  | 4.513839E-05  |
| 20    | C19   | -5.980987E-04 | 8.338675E-05  | 1.522454E-05  |
| 21    | C20   | -4.635482E-04 | 4.868756E-05  | -2.228858E-04 |
| 22    | C21   | 4.446269E-06  | -6.936987E-05 | -1.304250E-04 |
| 23    | C22   | 3.078131E-04  | -2.578838E-04 | -3.481255E-04 |
| 24    | H2    | -5.730636E-05 | 4.950621E-05  | 4.405165E-05  |
| 25    | H5    | 1.954477E-05  | 8.568029E-05  | 1.362704E-04  |
| 26    | H7    | 1.955898E-04  | 6.536586E-05  | 6.807380E-05  |
| 27    | H8    | 2.136577E-05  | 8.484329E-05  | 6.902984E-05  |
| 28    | H9    | 1.176141E-04  | 2.350077E-05  | -3.718630E-05 |
| 29    | H10   | -7.745929E-05 | -1.919398E-05 | -1.077771E-04 |
| 30    | H19   | 9.168477E-04  | -4.872536E-04 | -2.307688E-04 |
| 31    | H20   | 4.162644E-05  | 1.152786E-04  | -1.060391E-04 |
| 32    | H21   | -4.315960E-04 | -2.893514E-04 | 5.597398E-04  |
| 33    | H22   | -6.949958E-04 | 1.913902E-04  | 6.240169E-05  |
| 34    | H11   | -3.837703E-04 | -2.583737E-04 | -1.603510E-04 |
| 35    | H12   | 3.527341E-04  | 2.183684E-04  | -1.301972E-04 |
| 36    | H13   | 2.763897E-04  | -3.265669E-04 | -6.912106E-04 |
| ----- |       | -----         | -----         | -----         |
|       | total | -7.584374E-04 | 1.047206E-03  | -1.952950E-04 |

end of program derlb

start of program geopt 18

geometry optimization step 18

reading input hessian of dimension 108  
in five columns format  
reading input hessian of dimension 108  
in five columns format

Level shifts adjusted to satisfy step-size constraints

Step size: 0.0137363  
Cos(theta): 0.8065497

Final level shift: -8.3596499E-02

energy change: -4.0270E-05 \* ( 5.0000E-05 )  
gradient maximum: 1.2883E-03 . ( 4.5000E-04 )  
gradient rms: 3.2139E-04 . ( 3.0000E-04 )

step size: 0.01374 trust radius: 0.01326  
 displacement maximum: 6.6985E-03 . ( 1.8000E-03 )  
 displacement rms: 1.2436E-03 . ( 1.2000E-03 )  
 predicted energy change: -2.7552E-05 geom step: 1.3736E-  
 02 full step: 1.3736E-02  
 molecular structure not yet converged...

center of mass moved by:  
 x: -1.5235E-03 y: -4.0647E-04 z: 7.4771E-04

new geometry:

|      | angstroms     |               |               |
|------|---------------|---------------|---------------|
| atom | x             | y             | z             |
| H1   | -1.1873201905 | 1.8847634922  | -2.2316677566 |
| C1   | -1.1030927878 | 2.1181482941  | -1.1838949647 |
| C2   | -0.8793751125 | 2.6942968872  | 1.5026495827  |
| C3   | -0.8831297266 | 1.0848371531  | -0.2886072788 |
| C4   | -1.2059743721 | 3.4328132344  | -0.7606814381 |
| C5   | -1.0935475219 | 3.7128224899  | 0.5887436011  |
| C6   | -0.7695904075 | 1.3757737576  | 1.0729413905  |
| C7   | -0.7894824952 | -0.3544991003 | -0.7560809962 |
| H3   | -1.3727172012 | 4.2211109616  | -1.4723735491 |
| H4   | -1.1760485333 | 4.7256364509  | 0.9416702526  |
| H6   | -0.8043688305 | 2.9342827658  | 2.5452018449  |
| C16  | 0.6114086448  | -0.7638246990 | -1.2093397432 |
| C8   | -1.3998887338 | -1.2513678609 | 0.3434764623  |
| N2   | -0.5138422878 | 0.3364061235  | 1.9950808208  |
| C9   | -0.7771007553 | -0.9804147754 | 1.7027745446  |
| C10  | 0.0072741871  | 0.6564495426  | 3.3154525576  |
| O1   | -0.5651632382 | -1.8573120923 | 2.4922138261  |
| C23  | -1.3936276975 | -2.7431444845 | 0.0243600060  |
| C18  | 3.1422273541  | -1.5758415904 | -2.0922880672 |
| C19  | 0.7620756166  | -1.4811102087 | -2.3911003006 |
| C20  | 1.7562864098  | -0.4502741568 | -0.4813537730 |
| C21  | 3.0071222281  | -0.8549068134 | -0.9162439280 |
| C22  | 2.0135734768  | -1.8859168373 | -2.8309234675 |
| H2   | -0.1070555713 | -1.7282159956 | -2.9767969015 |
| H5   | 1.6788163286  | 0.1199897869  | 0.4253120691  |
| H7   | 3.8777025726  | -0.6024257981 | -0.3363393376 |
| H8   | 2.1028749005  | -2.4399435875 | -3.7487532009 |
| H9   | 4.1154148838  | -1.8870620979 | -2.4291195615 |
| H10  | -1.4352711356 | -0.4565037202 | -1.6219412074 |
| H19  | -0.3849834116 | -3.1343619628 | -0.0163225673 |
| H20  | -1.8697367307 | -2.9191031173 | -0.9356050868 |
| H21  | -1.9328123769 | -3.2927915575 | 0.7844882831  |
| H22  | -2.4355094942 | -0.9238968046 | 0.4447369194  |
| H11  | 0.8369736876  | 1.3475962853  | 3.2248941067  |
| H12  | 0.3453110102  | -0.2566078447 | 3.7735528480  |
| H13  | -0.7573821029 | 1.1013079917  | 3.9446352106  |

nuclear repulsion energy..... 1415.142182431 hartrees

/ end of geometry optimization iteration 18 /

-----  
end of program geopt

start of program onee  
smallest eigenvalue of S: 3.330E-04  
number of canonical orbitals..... 368  
end of program onee

start of program probe  
end of program probe

start of program grid

number of gridpoints:

|          | atom | H1  | C1  | C2  | C3  | C4  | C5  | C6  |
|----------|------|-----|-----|-----|-----|-----|-----|-----|
| C7       |      |     |     |     |     |     |     |     |
| grid # 1 |      | 72  | 87  | 89  | 89  | 89  | 88  | 83  |
| 81       |      |     |     |     |     |     |     |     |
| grid # 2 |      | 116 | 97  | 96  | 98  | 97  | 97  | 94  |
| 90       |      |     |     |     |     |     |     |     |
| grid # 3 |      | 217 | 182 | 184 | 195 | 183 | 184 | 189 |
| 177      |      |     |     |     |     |     |     |     |
| grid # 4 |      | 216 | 326 | 328 | 338 | 328 | 328 | 323 |
| 314      |      |     |     |     |     |     |     |     |

number of gridpoints:

|          | atom | H3  | H4  | H6  | C16 | C8  | N2  | C9  |
|----------|------|-----|-----|-----|-----|-----|-----|-----|
| C10      |      |     |     |     |     |     |     |     |
| grid # 1 |      | 73  | 73  | 70  | 92  | 82  | 95  | 82  |
| 69       |      |     |     |     |     |     |     |     |
| grid # 2 |      | 118 | 118 | 112 | 100 | 90  | 105 | 92  |
| 78       |      |     |     |     |     |     |     |     |
| grid # 3 |      | 223 | 223 | 207 | 194 | 174 | 211 | 176 |
| 147      |      |     |     |     |     |     |     |     |
| grid # 4 |      | 224 | 223 | 207 | 342 | 311 | 388 | 294 |
| 274      |      |     |     |     |     |     |     |     |

number of gridpoints:

|          | atom | O1  | C23 | C18 | C19 | C20 | C21 | C22 |
|----------|------|-----|-----|-----|-----|-----|-----|-----|
| H2       |      |     |     |     |     |     |     |     |
| grid # 1 |      | 111 | 73  | 89  | 88  | 88  | 89  | 89  |
| 71       |      |     |     |     |     |     |     |     |
| grid # 2 |      | 123 | 80  | 97  | 95  | 96  | 97  | 96  |
| 112      |      |     |     |     |     |     |     |     |
| grid # 3 |      | 256 | 148 | 183 | 183 | 182 | 184 | 183 |
| 212      |      |     |     |     |     |     |     |     |

grid # 4      450      286      327      326      327      327      327  
 211

number of gridpoints:

| atom     | H5  | H7  | H8  | H9  | H10 | H19 | H20 |
|----------|-----|-----|-----|-----|-----|-----|-----|
| grid # 1 | 71  | 73  | 73  | 73  | 67  | 71  | 71  |
| grid # 2 | 111 | 118 | 118 | 118 | 106 | 108 | 110 |
| grid # 3 | 212 | 223 | 223 | 224 | 202 | 218 | 216 |
| grid # 4 | 207 | 223 | 224 | 224 | 196 | 213 | 216 |

number of gridpoints:

| atom     | H22 | H11 | H12 | H13 | total |
|----------|-----|-----|-----|-----|-------|
| grid # 1 | 69  | 71  | 70  | 71  | 2862  |
| grid # 2 | 110 | 109 | 107 | 111 | 3728  |
| grid # 3 | 215 | 215 | 212 | 215 | 7189  |
| grid # 4 | 211 | 211 | 209 | 217 | 9911  |

end of program grid

start of program rwr

end of program rwr

start of program scf

|      | i | u | d | i | g |                  | RMS     | maximum |
|------|---|---|---|---|---|------------------|---------|---------|
|      | t | p | i | c | r |                  | energy  | DIIS    |
|      | e | d | i | u | i | total energy     | density | error   |
|      | r | t | s | t | d |                  | change  |         |
| etot | 1 | N | N | 1 | U | -783.03316813319 | 1.7E-05 | 3.6E-04 |
| etot | 2 | Y | Y | 4 | M | -783.03320871235 | 4.1E-05 | 1.0E-04 |
| etot | 3 | Y | Y | 4 | M | -783.03321401475 | 5.3E-06 | 3.4E-05 |
| etot | 4 | Y | N | 4 | M | -783.03321493573 | 9.2E-07 | 0.0E+00 |

Energy components, in hartrees:

|     |                               |                   |       |
|-----|-------------------------------|-------------------|-------|
| (A) | Nuclear repulsion.....        | 1415.14218243080  |       |
| (E) | Total one-electron terms..... | -3874.85345685298 |       |
| (I) | Total two-electron terms..... | 1676.67805948645  |       |
| (L) | Electronic energy.....        | -2198.17539736653 | (E+I) |
| (N) | Total energy.....             | -783.03321493573  | (A+L) |

SCFE: SCF energy: HF      -783.03321493573 hartrees      iterations:

4



HOMO energy: -0.30201  
LUMO energy: 0.12921

Orbital energies:

|           |           |           |           |           |           |
|-----------|-----------|-----------|-----------|-----------|-----------|
| -20.52697 | -15.60038 | -11.34624 | -11.28588 | -11.25650 | -11.24994 |
| -11.24304 | -11.24148 | -11.24048 | -11.23855 | -11.23785 | -11.23475 |
| -11.23134 | -11.23048 | -11.23004 | -11.22972 | -11.22853 | -11.22759 |
| -11.20919 | -1.39736  | -1.26963  | -1.16513  | -1.14900  | -1.10610  |
| -1.03006  | -1.01867  | -1.01790  | -1.01264  | -0.96261  | -0.93271  |
| -0.85811  | -0.83887  | -0.83329  | -0.82166  | -0.79611  | -0.74110  |
| -0.71110  | -0.69497  | -0.67302  | -0.66425  | -0.64448  | -0.63774  |
| -0.62740  | -0.61479  | -0.61224  | -0.60871  | -0.59714  | -0.58325  |
| -0.57639  | -0.55316  | -0.54871  | -0.54057  | -0.53120  | -0.51893  |
| -0.51499  | -0.50724  | -0.50096  | -0.49785  | -0.48463  | -0.46858  |
| -0.46290  | -0.42160  | -0.41153  | -0.34260  | -0.33286  | -0.32296  |
| -0.30201  | 0.12921   | 0.13408   | 0.14452   | 0.15240   | 0.20389   |
| 0.22965   | 0.24098   | 0.24815   | 0.26134   | 0.28753   |           |

end of program scf

start of program derla  
end of program derla

start of program rwr  
end of program rwr

start of program derlb

forces (hartrees/bohr) : total

| atom | label | x             | y             | z             |
|------|-------|---------------|---------------|---------------|
| 1    | H1    | -1.960124E-05 | 3.371344E-05  | -1.950939E-05 |
| 2    | C1    | -2.780475E-05 | 2.698006E-05  | -6.631887E-05 |
| 3    | C2    | -1.058196E-04 | 1.824795E-04  | 8.711571E-05  |
| 4    | C3    | 1.271265E-04  | -1.601169E-04 | 2.538795E-05  |
| 5    | C4    | -1.181164E-05 | 1.228740E-04  | 7.946300E-05  |
| 6    | C5    | -3.370351E-05 | 1.238149E-04  | -1.371151E-04 |
| 7    | C6    | 1.719533E-04  | -2.059000E-04 | -6.253616E-05 |
| 8    | C7    | -1.798474E-04 | 1.730538E-04  | -6.963155E-05 |
| 9    | H3    | -3.587927E-05 | 6.386988E-05  | -4.286803E-05 |
| 10   | H4    | -1.591673E-05 | 8.250113E-05  | -1.339744E-05 |
| 11   | H6    | -5.723768E-05 | 5.968289E-05  | 3.704330E-05  |
| 12   | C16   | -2.046426E-04 | -5.050863E-05 | -1.129473E-05 |
| 13   | C8    | 2.966512E-04  | -1.082374E-04 | -1.092849E-04 |
| 14   | N2    | -4.061630E-05 | -4.460462E-04 | -6.972469E-04 |
| 15   | C9    | -2.582695E-04 | 2.833889E-04  | 4.096679E-04  |

|       |       |               |               |               |
|-------|-------|---------------|---------------|---------------|
| 16    | C10   | -1.705919E-04 | -5.459403E-05 | 1.824871E-04  |
| 17    | O1    | 3.662036E-05  | 4.738231E-04  | -4.832017E-05 |
| 18    | C23   | 1.187420E-04  | -9.212490E-05 | 2.147317E-04  |
| 19    | C18   | 7.896305E-06  | -1.099049E-04 | -1.474924E-04 |
| 20    | C19   | 2.015475E-04  | -1.105140E-04 | -2.052264E-04 |
| 21    | C20   | 1.795557E-04  | 1.530909E-04  | 5.118744E-05  |
| 22    | C21   | 3.191963E-05  | 1.906495E-04  | 2.865419E-04  |
| 23    | C22   | -3.622568E-04 | 1.292405E-04  | 5.921281E-05  |
| 24    | H2    | -8.805562E-06 | -1.154540E-07 | 2.095742E-06  |
| 25    | H5    | -4.188889E-05 | 8.434437E-05  | 1.262667E-04  |
| 26    | H7    | -4.647847E-05 | 3.847366E-06  | 2.402106E-05  |
| 27    | H8    | -1.568541E-05 | -7.199004E-05 | -2.011127E-04 |
| 28    | H9    | -4.583838E-05 | 2.139176E-06  | -4.374302E-05 |
| 29    | H10   | -1.615027E-05 | 2.261342E-05  | 2.086467E-05  |
| 30    | H19   | -2.411518E-04 | 1.881472E-04  | -5.995746E-05 |
| 31    | H20   | -1.282477E-04 | -2.487653E-05 | -4.113130E-05 |
| 32    | H21   | 8.497377E-05  | 1.055472E-04  | -1.989192E-04 |
| 33    | H22   | -2.420652E-05 | -9.758595E-05 | 3.071754E-06  |
| 34    | H11   | -2.389571E-04 | 1.149375E-04  | 1.402976E-04  |
| 35    | H12   | 7.763427E-05  | 1.386311E-05  | 2.537519E-05  |
| 36    | H13   | 2.765265E-04  | -7.334709E-05 | 1.762824E-04  |
| ----- |       | -----         | -----         | -----         |
|       | total | -7.202619E-04 | 1.028740E-03  | -2.239920E-04 |

end of program derlb

start of program geopt 19

geometry optimization step 19

reading input hessian of dimension 108

in five columns format

reading input hessian of dimension 108

in five columns format

Level shifts adjusted to satisfy step-size constraints

Step size: 0.0101697

Cos(theta): 0.7144539

Final level shift: -6.5682809E-02

energy change: -1.0589E-05 \* ( 5.0000E-05 )

gradient maximum: 8.7892E-04 . ( 4.5000E-04 )

gradient rms: 2.1682E-04 \* ( 3.0000E-04 )

step size: 0.01017 trust radius: 0.01000

displacement maximum: 4.2088E-03 . ( 1.8000E-03 )

displacement rms: 9.2072E-04 \* ( 1.2000E-03 )

predicted energy change: -1.2097E-05 geom step: 1.0170E-

02 full step: 1.0170E-02

molecular structure not yet converged...

center of mass moved by:

x: 8.7882E-04 y: 5.6513E-04 z: -4.1137E-04

new geometry:

|      | angstroms     |               |               |
|------|---------------|---------------|---------------|
| atom | x             | y             | z             |
| H1   | -1.1869213278 | 1.8851642057  | -2.2315701173 |
| C1   | -1.1027279182 | 2.1186134627  | -1.1838049741 |
| C2   | -0.8799920433 | 2.6952093238  | 1.5026975236  |
| C3   | -0.8819477140 | 1.0852623750  | -0.2885924909 |
| C4   | -1.2066245591 | 3.4334659187  | -0.7606667434 |
| C5   | -1.0949282193 | 3.7136871647  | 0.5886801542  |
| C6   | -0.7684297722 | 1.3764467780  | 1.0728913710  |
| C7   | -0.7886740858 | -0.3540376693 | -0.7559771835 |
| H3   | -1.3740407952 | 4.2215403347  | -1.4725119437 |
| H4   | -1.1787019470 | 4.7264415871  | 0.9416033786  |
| H6   | -0.8061475133 | 2.9353203553  | 2.5453716288  |
| C16  | 0.6117494741  | -0.7639232359 | -1.2101429052 |
| C8   | -1.3975964479 | -1.2513757799 | 0.3440556445  |
| N2   | -0.5129988503 | 0.3371915589  | 1.9945382364  |
| C9   | -0.7759583656 | -0.9789520644 | 1.7035240353  |
| C10  | 0.0022451046  | 0.6567348640  | 3.3182729298  |
| O1   | -0.5636665830 | -1.8545470814 | 2.4937709467  |
| C23  | -1.3903532666 | -2.7427478752 | 0.0245911186  |
| C18  | 3.1403394605  | -1.5795030701 | -2.0938031075 |
| C19  | 0.7610110689  | -1.4804890283 | -2.3926217082 |
| C20  | 1.7572148973  | -0.4523576607 | -0.4816089039 |
| C21  | 3.0070776143  | -0.8591712688 | -0.9168016007 |
| C22  | 2.0112503391  | -1.8867327829 | -2.8330090636 |
| H2   | -0.1086894815 | -1.7262497063 | -2.9781239639 |
| H5   | 1.6801353578  | 0.1170682203  | 0.4257018532  |
| H7   | 3.8779579989  | -0.6094026362 | -0.3365260530 |
| H8   | 2.0995345144  | -2.4401718887 | -3.7516935852 |
| H9   | 4.1126448744  | -1.8926655170 | -2.4311591531 |
| H10  | -1.4353084823 | -0.4561214569 | -1.6210575160 |
| H19  | -0.3818935893 | -3.1312719704 | -0.0205739621 |
| H20  | -1.8709488458 | -2.9200083396 | -0.9329234580 |
| H21  | -1.9245227348 | -3.2933123078 | 0.7864924764  |
| H22  | -2.4332857294 | -0.9256232441 | 0.4454902988  |
| H11  | 0.8276287165  | 1.3539058026  | 3.2331626783  |
| H12  | 0.3447554438  | -0.2557767715 | 3.7741173115  |
| H13  | -0.7658878004 | 1.0943335119  | 3.9487948269  |

nuclear repulsion energy..... 1415.115717936 hartrees

-----  
/ end of geometry optimization iteration 19 /  
-----

end of program geopt

start of program onee

smallest eigenvalue of S: 3.332E-04  
number of canonical orbitals..... 368  
end of program onee

start of program probe  
end of program probe

start of program grid

number of gridpoints:

| atom     | H1  | C1  | C2  | C3  | C4  | C5  | C6  |
|----------|-----|-----|-----|-----|-----|-----|-----|
| C7       |     |     |     |     |     |     |     |
| grid # 1 | 72  | 87  | 89  | 89  | 89  | 88  | 84  |
| 81       |     |     |     |     |     |     |     |
| grid # 2 | 116 | 97  | 96  | 98  | 97  | 97  | 94  |
| 90       |     |     |     |     |     |     |     |
| grid # 3 | 217 | 182 | 184 | 194 | 183 | 184 | 189 |
| 177      |     |     |     |     |     |     |     |
| grid # 4 | 216 | 326 | 328 | 338 | 328 | 328 | 324 |
| 314      |     |     |     |     |     |     |     |

number of gridpoints:

| atom     | H3  | H4  | H6  | C16 | C8  | N2  | C9  |
|----------|-----|-----|-----|-----|-----|-----|-----|
| C10      |     |     |     |     |     |     |     |
| grid # 1 | 73  | 73  | 70  | 92  | 82  | 95  | 82  |
| 69       |     |     |     |     |     |     |     |
| grid # 2 | 118 | 118 | 112 | 100 | 90  | 105 | 92  |
| 78       |     |     |     |     |     |     |     |
| grid # 3 | 223 | 223 | 207 | 194 | 174 | 211 | 176 |
| 147      |     |     |     |     |     |     |     |
| grid # 4 | 224 | 223 | 207 | 342 | 311 | 387 | 293 |
| 275      |     |     |     |     |     |     |     |

number of gridpoints:

| atom     | O1  | C23 | C18 | C19 | C20 | C21 | C22 |
|----------|-----|-----|-----|-----|-----|-----|-----|
| H2       |     |     |     |     |     |     |     |
| grid # 1 | 111 | 74  | 89  | 88  | 88  | 89  | 89  |
| 71       |     |     |     |     |     |     |     |
| grid # 2 | 123 | 80  | 97  | 95  | 96  | 97  | 96  |
| 112      |     |     |     |     |     |     |     |
| grid # 3 | 256 | 144 | 183 | 183 | 182 | 184 | 183 |
| 212      |     |     |     |     |     |     |     |
| grid # 4 | 450 | 285 | 327 | 326 | 327 | 327 | 327 |
| 211      |     |     |     |     |     |     |     |

number of gridpoints:

| atom     | H5 | H7 | H8 | H9 | H10 | H19 | H20 |
|----------|----|----|----|----|-----|-----|-----|
| H21      |    |    |    |    |     |     |     |
| grid # 1 | 71 | 73 | 73 | 73 | 66  | 71  | 71  |
| 70       |    |    |    |    |     |     |     |

```

grid # 2      111    118    118    118    106    108    110
108
grid # 3      212    223    223    224    203    218    217
217
grid # 4      207    223    223    224    197    212    216
215

```

number of gridpoints:

| atom     | H22 | H11 | H12 | H13 | total |
|----------|-----|-----|-----|-----|-------|
| grid # 1 | 69  | 71  | 70  | 71  | 2863  |
| grid # 2 | 110 | 109 | 107 | 111 | 3728  |
| grid # 3 | 214 | 215 | 212 | 215 | 7185  |
| grid # 4 | 211 | 213 | 209 | 218 | 9912  |

end of program grid

start of program rwr

end of program rwr

start of program scf

|      | i | u | d | i | g |                  | RMS      | maximum |
|------|---|---|---|---|---|------------------|----------|---------|
|      | t | p | i | c | r |                  | energy   | DIIS    |
|      | e | d | i | u | i | total energy     | density  | error   |
|      | r | t | s | t | d |                  | change   |         |
| etot | 1 | N | N | 1 | U | -783.03319009415 | 1.5E-05  | 6.1E-04 |
| etot | 2 | Y | Y | 4 | M | -783.03322418596 | 3.4E-05  | 1.5E-04 |
| etot | 3 | Y | Y | 4 | M | -783.03322720334 | 3.0E-06  | 2.8E-05 |
| etot | 4 | Y | N | 4 | M | -783.03322677979 | -4.2E-07 | 0.0E+00 |

Energy components, in hartrees:

|     |                               |                   |       |
|-----|-------------------------------|-------------------|-------|
| (A) | Nuclear repulsion.....        | 1415.11571793578  |       |
| (E) | Total one-electron terms..... | -3874.79934611265 |       |
| (I) | Total two-electron terms..... | 1676.65040139707  |       |
| (L) | Electronic energy.....        | -2198.14894471557 | (E+I) |
| (N) | Total energy.....             | -783.03322677979  | (A+L) |

SCFE: SCF energy: HF -783.03322677979 hartrees iterations:  
4

HOMO energy: -0.30198  
LUMO energy: 0.12920

Orbital energies:

|           |           |           |           |           |           |
|-----------|-----------|-----------|-----------|-----------|-----------|
| -20.52689 | -15.60043 | -11.34603 | -11.28604 | -11.25662 | -11.24992 |
| -11.24287 | -11.24152 | -11.24053 | -11.23854 | -11.23787 | -11.23490 |
| -11.23123 | -11.23053 | -11.22998 | -11.22956 | -11.22854 | -11.22771 |

|           |          |          |          |          |          |
|-----------|----------|----------|----------|----------|----------|
| -11.20890 | -1.39766 | -1.26976 | -1.16510 | -1.14895 | -1.10610 |
| -1.03009  | -1.01860 | -1.01784 | -1.01273 | -0.96264 | -0.93277 |
| -0.85821  | -0.83902 | -0.83326 | -0.82165 | -0.79611 | -0.74118 |
| -0.71111  | -0.69496 | -0.67302 | -0.66427 | -0.64455 | -0.63767 |
| -0.62742  | -0.61480 | -0.61224 | -0.60865 | -0.59707 | -0.58335 |
| -0.57632  | -0.55313 | -0.54878 | -0.54064 | -0.53122 | -0.51904 |
| -0.51497  | -0.50725 | -0.50097 | -0.49782 | -0.48461 | -0.46863 |
| -0.46287  | -0.42170 | -0.41155 | -0.34256 | -0.33295 | -0.32285 |
| -0.30198  | 0.12920  | 0.13404  | 0.14457  | 0.15239  | 0.20403  |
| 0.22972   | 0.24104  | 0.24841  | 0.26131  | 0.28775  |          |

end of program scf

start of program derla  
end of program derla

start of program rwr  
end of program rwr

start of program derlb

forces (hartrees/bohr) : total

| atom | label | x             | y             | z             |
|------|-------|---------------|---------------|---------------|
| 1    | H1    | -1.995924E-05 | 4.185434E-05  | -2.873563E-05 |
| 2    | C1    | -1.960180E-07 | 1.077561E-04  | 1.067132E-05  |
| 3    | C2    | -8.150943E-05 | -3.242880E-05 | -4.345317E-05 |
| 4    | C3    | 7.229837E-05  | 7.651135E-05  | 2.084989E-05  |
| 5    | C4    | -1.862976E-05 | -7.091458E-05 | -1.045063E-04 |
| 6    | C5    | 2.811043E-05  | -3.749627E-05 | 5.588205E-05  |
| 7    | C6    | -1.185317E-04 | 2.924897E-04  | -1.619956E-04 |
| 8    | C7    | -3.449398E-05 | 9.940737E-05  | 3.539759E-05  |
| 9    | H3    | -1.410742E-05 | 4.833181E-05  | -4.112592E-05 |
| 10   | H4    | 2.501973E-07  | 6.034994E-05  | -1.837358E-05 |
| 11   | H6    | -4.285278E-05 | 1.021627E-05  | -7.868038E-06 |
| 12   | C16   | -8.794237E-05 | 5.999670E-05  | 8.662938E-05  |
| 13   | C8    | 2.056924E-04  | 1.189359E-06  | -2.112645E-04 |
| 14   | N2    | 2.207783E-04  | 4.993886E-04  | 5.708548E-04  |
| 15   | C9    | -1.993055E-04 | 1.450186E-05  | -4.086489E-04 |
| 16   | C10   | -2.213764E-05 | 6.483699E-05  | 1.167574E-04  |
| 17   | O1    | -5.757380E-05 | -3.142234E-04 | 4.001261E-04  |
| 18   | C23   | -1.362736E-04 | 1.945993E-04  | -1.291335E-05 |
| 19   | C18   | 1.119864E-04  | 9.333826E-06  | -2.841677E-06 |
| 20   | C19   | -2.675892E-04 | 5.800909E-05  | 9.349949E-06  |
| 21   | C20   | -2.130868E-04 | 1.848689E-05  | -1.272899E-04 |
| 22   | C21   | -5.330305E-05 | 4.347167E-06  | -3.964864E-05 |
| 23   | C22   | 1.056804E-04  | -8.952965E-05 | -1.436730E-04 |
| 24   | H2    | -2.627681E-05 | 3.768385E-05  | 2.389065E-05  |

|       |     |               |               |               |
|-------|-----|---------------|---------------|---------------|
| 25    | H5  | 5.199311E-06  | 5.874129E-05  | 5.445997E-05  |
| 26    | H7  | 9.213307E-05  | 4.812559E-05  | 3.019152E-05  |
| 27    | H8  | -3.377849E-06 | 3.777330E-05  | 1.108091E-05  |
| 28    | H9  | 3.767726E-05  | 3.031445E-05  | -2.763578E-05 |
| 29    | H10 | -4.019614E-05 | 9.783301E-06  | -5.311167E-05 |
| 30    | H19 | 3.854815E-04  | -1.579547E-04 | -1.218912E-04 |
| 31    | H20 | -3.458420E-05 | 6.576202E-05  | -8.903255E-05 |
| 32    | H21 | -2.099997E-04 | -1.443898E-04 | 2.280957E-04  |
| 33    | H22 | -3.277827E-04 | 7.122900E-05  | 1.309177E-05  |
| 34    | H11 | -3.075156E-04 | -6.448305E-05 | -3.723384E-05 |
| 35    | H12 | 1.659735E-04  | 6.175396E-05  | -1.733431E-05 |
| 36    | H13 | 1.424084E-04  | -1.248751E-04 | -2.296081E-04 |
| ----- |     | -----         | -----         | -----         |
| total |     | -7.435557E-04 | 1.046478E-03  | -2.608565E-04 |

end of program derlb

start of program geopt 20

geometry optimization step 20

reading input hessian of dimension 108  
in five columns format  
reading input hessian of dimension 108  
in five columns format

Level shifts adjusted to satisfy step-size constraints

Step size: 0.0209737  
Cos(theta): 0.5437530

Final level shift: -1.4188355E-02

energy change: -1.1844E-05 \* ( 5.0000E-05 )  
gradient maximum: 6.1036E-04 . ( 4.5000E-04 )  
gradient rms: 1.4279E-04 \* ( 3.0000E-04 )  
step size: 0.02097 trust radius: 0.02000  
displacement maximum: 1.5788E-02 . ( 1.8000E-03 )  
displacement rms: 1.8989E-03 . ( 1.2000E-03 )  
predicted energy change: -1.2114E-05 geom step: 2.0974E-  
02 full step: 2.0974E-02  
molecular structure not yet converged...

center of mass moved by:

x: -2.1281E-03 y: -2.4002E-04 z: 9.5604E-04

new geometry:

|      |               |              |               | angstroms |  |  |
|------|---------------|--------------|---------------|-----------|--|--|
| atom | x             | y            | z             |           |  |  |
| H1   | -1.1833053714 | 1.8853359354 | -2.2320908616 |           |  |  |
| C1   | -1.1002451245 | 2.1186038392 | -1.1842007806 |           |  |  |
| C2   | -0.8806395561 | 2.6944182754 | 1.5028696394  |           |  |  |

|     |               |               |               |
|-----|---------------|---------------|---------------|
| C3  | -0.8814094028 | 1.0852102029  | -0.2887724259 |
| C4  | -1.2033969688 | 3.4332141773  | -0.7608399732 |
| C5  | -1.0933025831 | 3.7130999140  | 0.5888506714  |
| C6  | -0.7692064579 | 1.3761666927  | 1.0727752446  |
| C7  | -0.7885303740 | -0.3542123823 | -0.7559696691 |
| H3  | -1.3687995161 | 4.2216677280  | -1.4726399230 |
| H4  | -1.1765899331 | 4.7258264500  | 0.9418676882  |
| H6  | -0.8079471835 | 2.9336123517  | 2.5458787424  |
| C16 | 0.6119695228  | -0.7642594387 | -1.2096507464 |
| C8  | -1.3991089279 | -1.2514934819 | 0.3431994191  |
| N2  | -0.5135214985 | 0.3371892012  | 1.9949943328  |
| C9  | -0.7805610045 | -0.9792202208 | 1.7041286556  |
| C10 | 0.0086257308  | 0.6574337028  | 3.3144864504  |
| O1  | -0.5746061124 | -1.8551559317 | 2.4962158034  |
| C23 | -1.3897218408 | -2.7431351703 | 0.0243339312  |
| C18 | 3.1417846626  | -1.5779202565 | -2.0934861880 |
| C19 | 0.7617907778  | -1.4806520936 | -2.3919667078 |
| C20 | 1.7571264433  | -0.4525065239 | -0.4813272079 |
| C21 | 3.0074909246  | -0.8580109015 | -0.9166725136 |
| C22 | 2.0128058928  | -1.8861931965 | -2.8322764514 |
| H2  | -0.1077428260 | -1.7267331122 | -2.9774866665 |
| H5  | 1.6798830061  | 0.1165589631  | 0.4261079871  |
| H7  | 3.8784031526  | -0.6070299890 | -0.3366478339 |
| H8  | 2.1014777661  | -2.4396677154 | -3.7505383183 |
| H9  | 4.1146731703  | -1.8896637147 | -2.4307648745 |
| H10 | -1.4346917528 | -0.4556626616 | -1.6216757860 |
| H19 | -0.3803257064 | -3.1324814069 | -0.0158816632 |
| H20 | -1.8645753190 | -2.9198672385 | -0.9361571668 |
| H21 | -1.9283396068 | -3.2936872082 | 0.7840256209  |
| H22 | -2.4354182674 | -0.9261759581 | 0.4424027505  |
| H11 | 0.8253544502  | 1.3634347372  | 3.2235821973  |
| H12 | 0.3650207318  | -0.2524504530 | 3.7649874903  |
| H13 | -0.7605808509 | 1.0849234282  | 3.9507142535  |

nuclear repulsion energy..... 1415.105494706 hartrees

-----  
/ end of geometry optimization iteration 20 /  
-----

end of program geopt

start of program onee

smallest eigenvalue of S: 3.331E-04

number of canonical orbitals..... 368

end of program onee

start of program probe

end of program probe



start of program grid

number of gridpoints:

| atom     | H1  | C1  | C2  | C3  | C4  | C5  | C6  |
|----------|-----|-----|-----|-----|-----|-----|-----|
| C7       |     |     |     |     |     |     |     |
| grid # 1 | 72  | 87  | 89  | 89  | 89  | 88  | 84  |
| 81       |     |     |     |     |     |     |     |
| grid # 2 | 116 | 97  | 96  | 98  | 97  | 97  | 94  |
| 90       |     |     |     |     |     |     |     |
| grid # 3 | 217 | 182 | 184 | 194 | 183 | 184 | 189 |
| 177      |     |     |     |     |     |     |     |
| grid # 4 | 216 | 326 | 328 | 338 | 328 | 328 | 323 |
| 314      |     |     |     |     |     |     |     |

number of gridpoints:

| atom     | H3  | H4  | H6  | C16 | C8  | N2  | C9  |
|----------|-----|-----|-----|-----|-----|-----|-----|
| C10      |     |     |     |     |     |     |     |
| grid # 1 | 73  | 73  | 70  | 92  | 82  | 95  | 82  |
| 69       |     |     |     |     |     |     |     |
| grid # 2 | 118 | 118 | 112 | 100 | 90  | 105 | 92  |
| 78       |     |     |     |     |     |     |     |
| grid # 3 | 223 | 223 | 207 | 194 | 174 | 211 | 176 |
| 146      |     |     |     |     |     |     |     |
| grid # 4 | 224 | 223 | 207 | 342 | 311 | 387 | 294 |
| 276      |     |     |     |     |     |     |     |

number of gridpoints:

| atom     | O1  | C23 | C18 | C19 | C20 | C21 | C22 |
|----------|-----|-----|-----|-----|-----|-----|-----|
| H2       |     |     |     |     |     |     |     |
| grid # 1 | 111 | 74  | 89  | 88  | 88  | 89  | 89  |
| 71       |     |     |     |     |     |     |     |
| grid # 2 | 123 | 81  | 97  | 95  | 96  | 97  | 96  |
| 112      |     |     |     |     |     |     |     |
| grid # 3 | 256 | 146 | 183 | 183 | 182 | 184 | 183 |
| 212      |     |     |     |     |     |     |     |
| grid # 4 | 450 | 285 | 327 | 326 | 327 | 327 | 327 |
| 211      |     |     |     |     |     |     |     |

number of gridpoints:

| atom     | H5  | H7  | H8  | H9  | H10 | H19 | H20 |
|----------|-----|-----|-----|-----|-----|-----|-----|
| H21      |     |     |     |     |     |     |     |
| grid # 1 | 71  | 73  | 73  | 73  | 66  | 71  | 71  |
| 70       |     |     |     |     |     |     |     |
| grid # 2 | 111 | 118 | 118 | 118 | 106 | 108 | 110 |
| 108      |     |     |     |     |     |     |     |
| grid # 3 | 212 | 222 | 223 | 224 | 203 | 218 | 216 |
| 217      |     |     |     |     |     |     |     |
| grid # 4 | 207 | 223 | 224 | 224 | 196 | 212 | 216 |
| 215      |     |     |     |     |     |     |     |

number of gridpoints:

| atom | H22 | H11 | H12 | H13 | total |
|------|-----|-----|-----|-----|-------|
|------|-----|-----|-----|-----|-------|

```

grid # 1      69      71      70      71      2863
grid # 2     110     109     107     111     3729
grid # 3     214     214     213     215     7184
grid # 4     211     211     209     218     9911

```

end of program grid

```

start of program rwr
end of program rwr

```

start of program scf

|      | i | u | d | i | g |                  |          | RMS     | maximum |
|------|---|---|---|---|---|------------------|----------|---------|---------|
|      | t | p | i | c | r |                  |          | density | DIIS    |
|      | e | d | i | u | i | total energy     | energy   | change  | error   |
|      | r | t | s | t | d |                  | change   |         |         |
| etot | 1 | N | N | 1 | U | -783.03313287242 |          | 2.3E-05 | 6.6E-04 |
| etot | 2 | Y | Y | 4 | M | -783.03321899828 | 8.6E-05  | 1.0E-05 | 1.9E-04 |
| etot | 3 | Y | Y | 4 | M | -783.03323067487 | 1.2E-05  | 2.8E-06 | 4.0E-05 |
| etot | 4 | Y | N | 4 | M | -783.03322973681 | -9.4E-07 | 0.0E+00 | 0.0E+00 |

Energy components, in hartrees:

```

(A) Nuclear repulsion..... 1415.10549470597
(E) Total one-electron terms..... -3874.77941502785
(I) Total two-electron terms..... 1676.64069058507
(L) Electronic energy..... -2198.13872444278 (E+I)
(N) Total energy..... -783.03322973681 (A+L)

```

```

SCFE: SCF energy: HF      -783.03322973681 hartrees  iterations:
4

```

```

HOMO energy:      -0.30199
LUMO energy:       0.12925

```

Orbital energies:

```

-20.52702  -15.60029  -11.34620  -11.28576  -11.25654  -11.24988
-11.24300  -11.24141  -11.24041  -11.23858  -11.23785  -11.23474
-11.23139  -11.23050  -11.23007  -11.22972  -11.22857  -11.22756
-11.20918  -1.39736   -1.26971  -1.16514  -1.14901  -1.10611
-1.03010  -1.01866   -1.01793  -1.01267  -0.96263  -0.93271
-0.85813  -0.83889   -0.83332  -0.82168  -0.79610  -0.74112
-0.71108  -0.69501   -0.67296  -0.66430  -0.64453  -0.63770
-0.62741  -0.61486   -0.61227  -0.60869  -0.59718  -0.58328
-0.57637  -0.55332   -0.54871  -0.54056  -0.53111  -0.51900
-0.51496  -0.50724   -0.50100  -0.49783  -0.48461  -0.46860
-0.46289  -0.42156   -0.41155  -0.34262  -0.33290  -0.32296
-0.30199   0.12925    0.13407   0.14450   0.15241   0.20384

```

0.22965 0.24101 0.24838 0.26132 0.28771

end of program scf

start of program derla  
end of program derla

start of program rwr  
end of program rwr

start of program der1b

forces (hartrees/bohr) : total

| atom | label | x             | y             | z             |
|------|-------|---------------|---------------|---------------|
| 1    | H1    | -2.009584E-05 | 4.453890E-05  | -1.656705E-05 |
| 2    | C1    | -3.624155E-05 | 9.076605E-05  | -6.143301E-05 |
| 3    | C2    | -8.332459E-05 | 2.118353E-04  | 8.658905E-05  |
| 4    | C3    | 5.878813E-05  | -1.941010E-04 | 5.590234E-05  |
| 5    | C4    | -7.830940E-06 | 1.409806E-04  | 8.425844E-05  |
| 6    | C5    | -4.583976E-05 | 1.319556E-04  | -1.483254E-04 |
| 7    | C6    | 1.305104E-04  | -7.464085E-05 | -8.405979E-05 |
| 8    | C7    | -1.444378E-04 | 1.465998E-04  | -8.993895E-05 |
| 9    | H3    | -4.698580E-05 | 6.615517E-05  | -5.238163E-05 |
| 10   | H4    | -1.983840E-05 | 7.168568E-05  | -3.528920E-05 |
| 11   | H6    | -8.840291E-05 | 7.624076E-05  | -3.467215E-05 |
| 12   | C16   | -2.403805E-04 | -1.981480E-05 | 3.934235E-06  |
| 13   | C8    | 2.622219E-04  | 6.777909E-05  | -1.128201E-04 |
| 14   | N2    | -6.148925E-05 | -6.644672E-04 | -1.072586E-03 |
| 15   | C9    | -1.204331E-04 | 2.860748E-04  | 5.164296E-04  |
| 16   | C10   | -4.050302E-04 | -1.035969E-04 | 4.806264E-04  |
| 17   | O1    | 1.482384E-04  | 5.325488E-04  | 6.573544E-06  |
| 18   | C23   | 1.203653E-04  | -1.556499E-04 | 1.144266E-04  |
| 19   | C18   | 4.959999E-05  | -7.410238E-05 | -1.218329E-04 |
| 20   | C19   | 1.769771E-04  | -1.301900E-04 | -2.283536E-04 |
| 21   | C20   | 1.379351E-04  | 1.162175E-04  | 5.316206E-05  |
| 22   | C21   | 6.991646E-05  | 1.877272E-04  | 2.528542E-04  |
| 23   | C22   | -3.325628E-04 | 6.166054E-05  | -8.932275E-07 |
| 24   | H2    | 4.711591E-06  | 1.411501E-05  | -1.467632E-05 |
| 25   | H5    | -1.410939E-05 | 1.194850E-04  | 1.326006E-04  |
| 26   | H7    | -4.237038E-05 | 1.177471E-05  | 3.532720E-05  |
| 27   | H8    | -1.636822E-05 | -4.542926E-05 | -1.777285E-04 |
| 28   | H9    | -6.929392E-05 | 6.581016E-06  | -3.022013E-05 |
| 29   | H10   | 3.661675E-05  | -3.057423E-06 | 3.306135E-05  |
| 30   | H19   | -2.384512E-04 | 1.871304E-04  | -3.286634E-05 |
| 31   | H20   | -1.271449E-04 | -4.121440E-05 | 7.115128E-06  |
| 32   | H21   | 4.262770E-05  | 6.082022E-05  | -1.799689E-04 |
| 33   | H22   | -1.572623E-04 | -3.964235E-05 | -1.049391E-05 |

|       |       |               |               |               |
|-------|-------|---------------|---------------|---------------|
| 34    | H11   | -1.477178E-04 | 6.129591E-05  | 1.481875E-04  |
| 35    | H12   | 3.914222E-05  | -1.903404E-05 | 1.183709E-04  |
| 36    | H13   | 4.688385E-04  | -8.952801E-05 | 1.368794E-04  |
| ----- |       |               |               |               |
|       | total | -7.191221E-04 | 1.039499E-03  | -2.388085E-04 |

end of program derlb

start of program geopt 21

geometry optimization step 21

reading input hessian of dimension 108  
in five columns format  
reading input hessian of dimension 108  
in five columns format

Level shifts adjusted to satisfy step-size constraints

Step size: 0.0106758

Cos(theta): 0.6455990

Final level shift: -5.5765491E-02

energy change: -2.9570E-06 \* ( 5.0000E-05 )  
gradient maximum: 1.5133E-03 . ( 4.5000E-04 )  
gradient rms: 2.7032E-04 \* ( 3.0000E-04 )  
step size: 0.01068 trust radius: 0.01000  
displacement maximum: 5.5502E-03 . ( 1.8000E-03 )  
displacement rms: 9.6654E-04 \* ( 1.2000E-03 )  
predicted energy change: -1.3467E-05 geom step: 1.0676E-  
02 full step: 1.0676E-02  
molecular structure not yet converged...

center of mass moved by:

x: 1.6099E-03 y: 6.5865E-04 z: -7.4481E-04

new geometry:

|      | angstroms     |               |               |
|------|---------------|---------------|---------------|
| atom | x             | y             | z             |
| H1   | -1.1838446186 | 1.8857210295  | -2.2319614009 |
| C1   | -1.1004137980 | 2.1191013413  | -1.1841237428 |
| C2   | -0.8809630112 | 2.6956465123  | 1.5026239201  |
| C3   | -0.8802564599 | 1.0856569582  | -0.2887947676 |
| C4   | -1.2047158991 | 3.4339750976  | -0.7611045440 |
| C5   | -1.0949839810 | 3.7141515292  | 0.5883840002  |
| C6   | -0.7675108398 | 1.3770076252  | 1.0726458703  |
| C7   | -0.7879093639 | -0.3538148843 | -0.7558731683 |
| H3   | -1.3714121764 | 4.2220009569  | -1.4731876393 |
| H4   | -1.1797176634 | 4.7268669894  | 0.9411683427  |
| H6   | -0.8094456879 | 2.9353014578  | 2.5455772599  |
| C16  | 0.6120687758  | -0.7645848589 | -1.2105252148 |

|     |               |               |               |
|-----|---------------|---------------|---------------|
| C8  | -1.3971522040 | -1.2513055534 | 0.3440516203  |
| N2  | -0.5119723496 | 0.3376603575  | 1.9941243738  |
| C9  | -0.7783788699 | -0.9778680155 | 1.7047852932  |
| C10 | 0.0023010936  | 0.6558796803  | 3.3188522462  |
| O1  | -0.5702014687 | -1.8522892703 | 2.4974584523  |
| C23 | -1.3882508626 | -2.7429017787 | 0.0251984336  |
| C18 | 3.1399991444  | -1.5808736028 | -2.0951812321 |
| C19 | 0.7606934712  | -1.4809832169 | -2.3931859698 |
| C20 | 1.7578993010  | -0.4535446674 | -0.4822447350 |
| C21 | 3.0074611356  | -0.8607324919 | -0.9179124878 |
| C22 | 2.0105590528  | -1.8875816218 | -2.8340808691 |
| H2  | -0.1092753969 | -1.7262003731 | -2.9783532095 |
| H5  | 1.6813326902  | 0.1158099975  | 0.4253166947  |
| H7  | 3.8786604084  | -0.6114370400 | -0.3378833514 |
| H8  | 2.0983840058  | -2.4408226043 | -3.7528994158 |
| H9  | 4.1120590457  | -1.8942171409 | -2.4330244873 |
| H10 | -1.4347092663 | -0.4556836761 | -1.6207938681 |
| H19 | -0.3793209703 | -3.1303470850 | -0.0200773983 |
| H20 | -1.8686925338 | -2.9209373142 | -0.9322670811 |
| H21 | -1.9219907589 | -3.2938616502 | 0.7871224693  |
| H22 | -2.4335850215 | -0.9267821849 | 0.4437870141  |
| H11 | 0.8180908164  | 1.3640913483  | 3.2354692278  |
| H12 | 0.3576225510  | -0.2545222203 | 3.7694100624  |
| H13 | -0.7692566277 | 1.0803893955  | 3.9540632924  |

nuclear repulsion energy..... 1415.007074684 hartrees

-----  
 / end of geometry optimization iteration 21 /  
 -----

end of program geopt

start of program onee  
 smallest eigenvalue of S: 3.333E-04  
 number of canonical orbitals..... 368  
 end of program onee

start of program probe  
 end of program probe

start of program grid

number of gridpoints:

| atom     | H1  | C1 | C2 | C3 | C4 | C5 | C6 |
|----------|-----|----|----|----|----|----|----|
| C7       |     |    |    |    |    |    |    |
| grid # 1 | 72  | 87 | 89 | 89 | 89 | 88 | 84 |
| 81       |     |    |    |    |    |    |    |
| grid # 2 | 116 | 97 | 96 | 98 | 97 | 97 | 94 |
| 90       |     |    |    |    |    |    |    |

|          |     |     |     |     |     |     |     |
|----------|-----|-----|-----|-----|-----|-----|-----|
| grid # 3 | 217 | 182 | 184 | 194 | 183 | 184 | 189 |
| 177      |     |     |     |     |     |     |     |
| grid # 4 | 216 | 326 | 328 | 338 | 328 | 328 | 323 |
| 314      |     |     |     |     |     |     |     |

number of gridpoints:

|          |     |     |     |     |     |     |     |
|----------|-----|-----|-----|-----|-----|-----|-----|
| atom     | H3  | H4  | H6  | C16 | C8  | N2  | C9  |
| C10      |     |     |     |     |     |     |     |
| grid # 1 | 73  | 73  | 70  | 92  | 82  | 95  | 82  |
| 69       |     |     |     |     |     |     |     |
| grid # 2 | 118 | 118 | 112 | 100 | 90  | 105 | 92  |
| 79       |     |     |     |     |     |     |     |
| grid # 3 | 223 | 223 | 207 | 194 | 174 | 211 | 176 |
| 145      |     |     |     |     |     |     |     |
| grid # 4 | 224 | 223 | 207 | 342 | 311 | 387 | 293 |
| 277      |     |     |     |     |     |     |     |

number of gridpoints:

|          |     |     |     |     |     |     |     |
|----------|-----|-----|-----|-----|-----|-----|-----|
| atom     | O1  | C23 | C18 | C19 | C20 | C21 | C22 |
| H2       |     |     |     |     |     |     |     |
| grid # 1 | 111 | 73  | 89  | 88  | 88  | 89  | 89  |
| 71       |     |     |     |     |     |     |     |
| grid # 2 | 123 | 81  | 97  | 95  | 96  | 97  | 96  |
| 112      |     |     |     |     |     |     |     |
| grid # 3 | 256 | 148 | 183 | 183 | 182 | 184 | 183 |
| 212      |     |     |     |     |     |     |     |
| grid # 4 | 450 | 287 | 327 | 326 | 327 | 327 | 327 |
| 211      |     |     |     |     |     |     |     |

number of gridpoints:

|          |     |     |     |     |     |     |     |
|----------|-----|-----|-----|-----|-----|-----|-----|
| atom     | H5  | H7  | H8  | H9  | H10 | H19 | H20 |
| H21      |     |     |     |     |     |     |     |
| grid # 1 | 71  | 73  | 73  | 73  | 67  | 71  | 71  |
| 70       |     |     |     |     |     |     |     |
| grid # 2 | 111 | 118 | 118 | 118 | 106 | 108 | 110 |
| 108      |     |     |     |     |     |     |     |
| grid # 3 | 212 | 223 | 223 | 224 | 202 | 218 | 217 |
| 217      |     |     |     |     |     |     |     |
| grid # 4 | 207 | 223 | 224 | 224 | 197 | 212 | 216 |
| 215      |     |     |     |     |     |     |     |

number of gridpoints:

|          |     |     |     |     |       |
|----------|-----|-----|-----|-----|-------|
| atom     | H22 | H11 | H12 | H13 | total |
| grid # 1 | 69  | 71  | 70  | 71  | 2863  |
| grid # 2 | 110 | 109 | 107 | 111 | 3730  |
| grid # 3 | 214 | 215 | 213 | 217 | 7189  |
| grid # 4 | 211 | 211 | 209 | 218 | 9914  |

end of program grid

start of program rwr

end of program rwr

start of program scf

|      | i | u | d | i | g |                  |         | RMS     | maximum |
|------|---|---|---|---|---|------------------|---------|---------|---------|
|      | t | p | i | c | r |                  | energy  | density | DIIS    |
|      | e | d | i | u | i |                  | change  | change  | error   |
|      | r | t | s | t | d | total energy     |         |         |         |
| etot | 1 | N | N | 1 | U | -783.03319507055 |         | 1.5E-05 | 5.4E-04 |
| etot | 2 | Y | Y | 4 | M | -783.03323060849 | 3.6E-05 | 6.3E-06 | 1.5E-04 |
| etot | 3 | Y | Y | 4 | M | -783.03323206347 | 1.5E-06 | 2.2E-06 | 3.3E-05 |
| etot | 4 | Y | N | 4 | M | -783.03323263437 | 5.7E-07 | 0.0E+00 | 0.0E+00 |

Energy components, in hartrees:

|     |                               |                   |       |
|-----|-------------------------------|-------------------|-------|
| (A) | Nuclear repulsion.....        | 1415.00707468425  |       |
| (E) | Total one-electron terms..... | -3874.58115429391 |       |
| (I) | Total two-electron terms..... | 1676.54084697530  |       |
| (L) | Electronic energy.....        | -2198.04030731862 | (E+I) |
| (N) | Total energy.....             | -783.03323263437  | (A+L) |

SCFE: SCF energy: HF -783.03323263437 hartrees iterations:  
4

HOMO energy: -0.30202  
LUMO energy: 0.12920

Orbital energies:

|           |           |           |           |           |           |
|-----------|-----------|-----------|-----------|-----------|-----------|
| -20.52675 | -15.60050 | -11.34602 | -11.28611 | -11.25663 | -11.24998 |
| -11.24297 | -11.24158 | -11.24057 | -11.23855 | -11.23789 | -11.23493 |
| -11.23121 | -11.23054 | -11.22998 | -11.22957 | -11.22852 | -11.22773 |
| -11.20896 | -1.39765  | -1.26973  | -1.16510  | -1.14896  | -1.10607  |
| -1.03011  | -1.01862  | -1.01785  | -1.01275  | -0.96262  | -0.93278  |
| -0.85823  | -0.83906  | -0.83328  | -0.82167  | -0.79612  | -0.74120  |
| -0.71108  | -0.69498  | -0.67297  | -0.66428  | -0.64459  | -0.63762  |
| -0.62744  | -0.61484  | -0.61225  | -0.60857  | -0.59698  | -0.58337  |
| -0.57631  | -0.55323  | -0.54884  | -0.54065  | -0.53114  | -0.51906  |
| -0.51493  | -0.50725  | -0.50101  | -0.49779  | -0.48459  | -0.46867  |
| -0.46287  | -0.42169  | -0.41155  | -0.34257  | -0.33297  | -0.32284  |
| -0.30202  | 0.12920   | 0.13402   | 0.14456   | 0.15236   | 0.20400   |
| 0.22973   | 0.24104   | 0.24864   | 0.26129   | 0.28791   |           |

end of program scf

start of program derla  
end of program derla

start of program rwr  
end of program rwr

start of program der1b

forces (hartrees/bohr) : total

| atom  | label | x             | y             | z             |
|-------|-------|---------------|---------------|---------------|
| 1     | H1    | -1.891526E-05 | 3.681911E-05  | -3.883671E-05 |
| 2     | C1    | 4.098733E-06  | 8.305300E-05  | -1.179986E-05 |
| 3     | C2    | -4.127792E-05 | -1.217594E-04 | -9.203155E-05 |
| 4     | C3    | 1.449174E-05  | 1.103326E-04  | 2.951615E-05  |
| 5     | C4    | -2.717421E-05 | -1.235957E-04 | -1.460539E-04 |
| 6     | C5    | 3.683159E-05  | -3.925613E-05 | 1.270241E-04  |
| 7     | C6    | -1.859365E-04 | 3.429035E-04  | -1.042361E-04 |
| 8     | C7    | 4.684163E-05  | -8.246545E-06 | 5.775395E-05  |
| 9     | H3    | -1.136830E-05 | 5.158783E-05  | -3.886596E-05 |
| 10    | H4    | -6.403389E-06 | 6.688649E-05  | 7.237490E-07  |
| 11    | H6    | -3.100028E-05 | 1.744437E-05  | 2.001002E-05  |
| 12    | C16   | 7.212567E-06  | 1.238818E-04  | 1.294888E-04  |
| 13    | C8    | 2.441704E-05  | 5.198429E-05  | -1.180939E-04 |
| 14    | N2    | 2.533677E-04  | 5.402540E-04  | 8.460801E-04  |
| 15    | C9    | -9.207294E-05 | -5.251305E-05 | -5.716448E-04 |
| 16    | C10   | -3.615908E-05 | 1.775448E-04  | 5.722617E-05  |
| 17    | O1    | -1.332531E-04 | -4.237311E-04 | 3.247466E-04  |
| 18    | C23   | -1.433637E-04 | 2.234657E-04  | -7.140343E-05 |
| 19    | C18   | 1.164926E-04  | 3.011888E-05  | 2.193885E-05  |
| 20    | C19   | -3.090097E-04 | 1.136871E-04  | 7.854669E-05  |
| 21    | C20   | -2.488769E-04 | 4.906342E-05  | -6.082866E-05 |
| 22    | C21   | -5.325715E-05 | -2.207554E-05 | -7.465116E-05 |
| 23    | C22   | 1.710025E-04  | -8.526338E-05 | -1.280411E-04 |
| 24    | H2    | -7.478480E-05 | 1.927847E-05  | -2.146933E-05 |
| 25    | H5    | -2.973703E-06 | -3.230521E-06 | -3.046197E-05 |
| 26    | H7    | 8.801257E-05  | 4.441310E-05  | 2.493007E-05  |
| 27    | H8    | -2.565978E-06 | 2.832492E-05  | -9.470991E-06 |
| 28    | H9    | 5.904517E-05  | 1.951386E-05  | -2.788960E-05 |
| 29    | H10   | -7.270369E-05 | 2.412400E-05  | -7.886933E-05 |
| 30    | H19   | 3.535550E-04  | -1.588965E-04 | -9.565487E-05 |
| 31    | H20   | -6.018620E-06 | 6.586207E-05  | -9.145644E-05 |
| 32    | H21   | -1.860283E-04 | -1.213773E-04 | 2.358173E-04  |
| 33    | H22   | -2.184872E-04 | 5.954641E-05  | 2.359554E-05  |
| 34    | H11   | -1.730578E-04 | -8.638448E-05 | -8.805156E-05 |
| 35    | H12   | 1.236212E-04  | 1.050370E-04  | -1.256865E-04 |
| 36    | H13   | 2.622021E-05  | -8.681337E-05 | -2.278204E-04 |
| total |       | -7.494783E-04 | 1.051984E-03  | -2.759200E-04 |

end of program der1b



start of program geopt 22

geometry optimization step 22

reading input hessian of dimension 108  
in five columns format  
reading input hessian of dimension 108  
in five columns format

Level shifts adjusted to satisfy step-size constraints

Step size: 0.0101821  
Cos(theta): 0.7075336

Final level shift: -5.2647640E-02

energy change: -2.8976E-06 \* ( 5.0000E-05 )  
gradient maximum: 7.2565E-04 . ( 4.5000E-04 )  
gradient rms: 1.5949E-04 \* ( 3.0000E-04 )  
step size: 0.01018 trust radius: 0.01000  
displacement maximum: 6.2505E-03 . ( 1.8000E-03 )  
displacement rms: 9.2184E-04 \* ( 1.2000E-03 )  
predicted energy change: -9.0748E-06 geom step: 1.0182E-  
02 full step: 1.0182E-02  
molecular structure not yet converged...

center of mass moved by:

x: -1.3929E-03 y: -2.8193E-04 z: 6.9961E-04

new geometry:

|      | angstroms     |               |               |
|------|---------------|---------------|---------------|
| atom | x             | y             | z             |
| H1   | -1.1819150396 | 1.8853922550  | -2.2323270409 |
| C1   | -1.0992989228 | 2.1187762076  | -1.1844060309 |
| C2   | -0.8815820860 | 2.6950766907  | 1.5027188160  |
| C3   | -0.8806626123 | 1.0854731666  | -0.2886848442 |
| C4   | -1.2028950183 | 3.4334766868  | -0.7614131651 |
| C5   | -1.0939437286 | 3.7136083695  | 0.5883486982  |
| C6   | -0.7688426034 | 1.3767839590  | 1.0728254098  |
| C7   | -0.7880471035 | -0.3540376930 | -0.7557727134 |
| H3   | -1.3681439538 | 4.2217396413  | -1.4735567144 |
| H4   | -1.1780020057 | 4.7264297293  | 0.9410291195  |
| H6   | -0.8105475239 | 2.9343387731  | 2.5458451578  |
| C16  | 0.6121509266  | -0.7644500039 | -1.2099567201 |
| C8   | -1.3984320302 | -1.2513737008 | 0.3435064911  |
| N2   | -0.5125884590 | 0.3376215864  | 1.9949682824  |
| C9   | -0.7805205459 | -0.9784903779 | 1.7047948851  |
| C10  | 0.0068779638  | 0.6569622363  | 3.3162775632  |
| O1   | -0.5757157312 | -1.8536596101 | 2.4980356622  |
| C23  | -1.3884931302 | -2.7431703510 | 0.0246625620  |
| C18  | 3.1412984651  | -1.5794441393 | -2.0946602431 |
| C19  | 0.7612996966  | -1.4804949526 | -2.3927325686 |
| C20  | 1.7576783737  | -0.4535735564 | -0.4816542029 |

|     |               |               |               |
|-----|---------------|---------------|---------------|
| C21 | 3.0077418962  | -0.8598857754 | -0.9173277593 |
| C22 | 2.0119309545  | -1.8865869491 | -2.8335742306 |
| H2  | -0.1085073890 | -1.7258975192 | -2.9782114803 |
| H5  | 1.6810112496  | 0.1149985720  | 0.4261636982  |
| H7  | 3.8789075311  | -0.6099995691 | -0.3371557358 |
| H8  | 2.1001468786  | -2.4394912529 | -3.7523637895 |
| H9  | 4.1138566484  | -1.8918002132 | -2.4323487958 |
| H10 | -1.4344082104 | -0.4555899869 | -1.6212999706 |
| H19 | -0.3789138206 | -3.1316121882 | -0.0177324693 |
| H20 | -1.8653528998 | -2.9205324456 | -0.9347511236 |
| H21 | -1.9251914574 | -3.2941968030 | 0.7853139446  |
| H22 | -2.4352334309 | -0.9269095552 | 0.4425019773  |
| H11 | 0.8195433734  | 1.3677845721  | 3.2278540324  |
| H12 | 0.3686498275  | -0.2520725686 | 3.7642217714  |
| H13 | -0.7641492419 | 1.0781467248  | 3.9540976663  |

nuclear repulsion energy..... 1414.981356114 hartrees

-----  
 / end of geometry optimization iteration 22 /  
 -----

end of program geopt

start of program onee  
 smallest eigenvalue of S: 3.332E-04  
 number of canonical orbitals..... 368  
 end of program onee

start of program probe  
 end of program probe

start of program grid

number of gridpoints:

| atom     | H1  | C1  | C2  | C3  | C4  | C5  | C6  |
|----------|-----|-----|-----|-----|-----|-----|-----|
| C7       |     |     |     |     |     |     |     |
| grid # 1 | 72  | 87  | 89  | 89  | 89  | 88  | 84  |
| 81       |     |     |     |     |     |     |     |
| grid # 2 | 116 | 97  | 96  | 98  | 97  | 97  | 94  |
| 90       |     |     |     |     |     |     |     |
| grid # 3 | 217 | 182 | 184 | 194 | 183 | 184 | 189 |
| 177      |     |     |     |     |     |     |     |
| grid # 4 | 216 | 326 | 328 | 338 | 328 | 328 | 323 |
| 314      |     |     |     |     |     |     |     |

number of gridpoints:

| atom | H3 | H4 | H6 | C16 | C8 | N2 | C9 |
|------|----|----|----|-----|----|----|----|
| C10  |    |    |    |     |    |    |    |

|     |          |     |     |     |     |     |     |     |
|-----|----------|-----|-----|-----|-----|-----|-----|-----|
| 69  | grid # 1 | 73  | 73  | 70  | 92  | 82  | 95  | 82  |
| 78  | grid # 2 | 118 | 118 | 112 | 100 | 90  | 105 | 92  |
| 146 | grid # 3 | 223 | 223 | 207 | 194 | 174 | 211 | 176 |
| 276 | grid # 4 | 224 | 223 | 207 | 342 | 311 | 387 | 293 |

number of gridpoints:

|     |          |     |     |     |     |     |     |     |
|-----|----------|-----|-----|-----|-----|-----|-----|-----|
| H2  | atom     | O1  | C23 | C18 | C19 | C20 | C21 | C22 |
| 71  | grid # 1 | 111 | 73  | 89  | 88  | 88  | 89  | 89  |
| 112 | grid # 2 | 123 | 80  | 97  | 95  | 96  | 97  | 96  |
| 212 | grid # 3 | 256 | 145 | 183 | 183 | 182 | 184 | 183 |
| 211 | grid # 4 | 450 | 285 | 327 | 326 | 327 | 327 | 327 |

number of gridpoints:

|     |          |     |     |     |     |     |     |     |
|-----|----------|-----|-----|-----|-----|-----|-----|-----|
| H21 | atom     | H5  | H7  | H8  | H9  | H10 | H19 | H20 |
| 70  | grid # 1 | 71  | 73  | 73  | 73  | 67  | 71  | 71  |
| 108 | grid # 2 | 111 | 118 | 118 | 118 | 106 | 108 | 110 |
| 217 | grid # 3 | 212 | 223 | 223 | 224 | 202 | 218 | 216 |
| 215 | grid # 4 | 207 | 223 | 224 | 224 | 197 | 212 | 216 |

number of gridpoints:

|  |          |     |     |     |     |       |
|--|----------|-----|-----|-----|-----|-------|
|  | atom     | H22 | H11 | H12 | H13 | total |
|  | grid # 1 | 69  | 71  | 70  | 71  | 2863  |
|  | grid # 2 | 110 | 109 | 107 | 111 | 3728  |
|  | grid # 3 | 214 | 214 | 213 | 217 | 7185  |
|  | grid # 4 | 211 | 211 | 209 | 218 | 9911  |

end of program grid

start of program rwr  
end of program rwr

start of program scf

|   |   |   |   |   |        |                             |
|---|---|---|---|---|--------|-----------------------------|
| i | u | d | i | g |        |                             |
| t | p | i | c | r |        |                             |
| e | d | i | u | i | energy | RMS maximum<br>density DIIS |

|      | r | t | s | t | d | total energy     | change   | change  | error   |
|------|---|---|---|---|---|------------------|----------|---------|---------|
| etot | 1 | N | N | 1 | U | -783.03320706613 |          | 1.4E-05 | 3.7E-04 |
| etot | 2 | Y | Y | 4 | M | -783.03323229466 | 2.5E-05  | 5.5E-06 | 9.8E-05 |
| etot | 3 | Y | Y | 4 | M | -783.03323618442 | 3.9E-06  | 1.8E-06 | 2.7E-05 |
| etot | 4 | Y | N | 4 | M | -783.03323580747 | -3.8E-07 | 0.0E+00 | 0.0E+00 |

Energy components, in hartrees:

|     |                               |                   |       |
|-----|-------------------------------|-------------------|-------|
| (A) | Nuclear repulsion.....        | 1414.98135611356  |       |
| (E) | Total one-electron terms..... | -3874.53252926674 |       |
| (I) | Total two-electron terms..... | 1676.51793734571  |       |
| (L) | Electronic energy.....        | -2198.01459192103 | (E+I) |
| (N) | Total energy.....             | -783.03323580747  | (A+L) |

SCFE: SCF energy: HF -783.03323580747 hartrees iterations:  
4

HOMO energy: -0.30201  
LUMO energy: 0.12923

Orbital energies:

|           |           |           |           |           |           |
|-----------|-----------|-----------|-----------|-----------|-----------|
| -20.52695 | -15.60031 | -11.34612 | -11.28586 | -11.25655 | -11.24990 |
| -11.24304 | -11.24145 | -11.24046 | -11.23861 | -11.23788 | -11.23483 |
| -11.23138 | -11.23057 | -11.23008 | -11.22972 | -11.22861 | -11.22762 |
| -11.20916 | -1.39734  | -1.26958  | -1.16510  | -1.14898  | -1.10605  |
| -1.03006  | -1.01866  | -1.01789  | -1.01267  | -0.96259  | -0.93269  |
| -0.85812  | -0.83889  | -0.83330  | -0.82168  | -0.79608  | -0.74110  |
| -0.71102  | -0.69499  | -0.67291  | -0.66427  | -0.64454  | -0.63764  |
| -0.62741  | -0.61486  | -0.61226  | -0.60861  | -0.59708  | -0.58329  |
| -0.57634  | -0.55331  | -0.54872  | -0.54060  | -0.53107  | -0.51899  |
| -0.51493  | -0.50721  | -0.50099  | -0.49780  | -0.48460  | -0.46860  |
| -0.46287  | -0.42156  | -0.41154  | -0.34261  | -0.33290  | -0.32293  |
| -0.30201  | 0.12923   | 0.13405   | 0.14450   | 0.15238   | 0.20384   |
| 0.22969   | 0.24101   | 0.24855   | 0.26131   | 0.28781   |           |

end of program scf

start of program derla  
end of program derla

start of program rwr  
end of program rwr

start of program derlb

forces (hartrees/bohr) : total

| atom  | label | x             | y             | z             |
|-------|-------|---------------|---------------|---------------|
| 1     | H1    | -1.916563E-05 | 3.115840E-05  | -2.179536E-06 |
| 2     | C1    | -3.176839E-05 | 5.571029E-05  | -4.887123E-05 |
| 3     | C2    | -8.364972E-05 | 1.522264E-04  | 5.976368E-05  |
| 4     | C3    | 5.657305E-05  | -1.107126E-04 | 3.655009E-06  |
| 5     | C4    | -1.432425E-05 | 1.292198E-04  | 8.364702E-05  |
| 6     | C5    | -4.711387E-05 | 9.593937E-05  | -1.181324E-04 |
| 7     | C6    | 1.462065E-04  | -1.417284E-04 | -1.954080E-05 |
| 8     | C7    | -1.447753E-04 | 1.209384E-04  | -5.869440E-05 |
| 9     | H3    | -3.303763E-05 | 4.074427E-05  | -1.765869E-05 |
| 10    | H4    | -2.422724E-05 | 3.672910E-05  | -2.063647E-05 |
| 11    | H6    | -5.377233E-05 | 5.986436E-05  | -2.376962E-05 |
| 12    | C16   | -1.437880E-04 | -3.278992E-05 | -2.384321E-05 |
| 13    | C8    | 1.682461E-04  | -8.141492E-06 | -6.768585E-05 |
| 14    | N2    | -8.685477E-05 | -3.125792E-04 | -7.054728E-04 |
| 15    | C9    | -1.669181E-04 | 1.614411E-04  | 3.996291E-04  |
| 16    | C10   | -1.705983E-04 | -6.270829E-05 | 1.695849E-04  |
| 17    | O1    | 7.917364E-05  | 3.825163E-04  | -6.811426E-05 |
| 18    | C23   | 7.817251E-05  | -9.317944E-05 | 1.096917E-04  |
| 19    | C18   | -2.707985E-05 | -1.515457E-05 | -5.897308E-05 |
| 20    | C19   | 1.350316E-04  | -7.162433E-05 | -1.525613E-04 |
| 21    | C20   | 1.302495E-04  | 3.667741E-05  | -9.903622E-06 |
| 22    | C21   | 1.332486E-05  | 1.051566E-04  | 1.162654E-04  |
| 23    | C22   | -2.098854E-04 | 8.554273E-05  | 4.232424E-05  |
| 24    | H2    | 1.018806E-05  | 3.065519E-05  | 1.245542E-05  |
| 25    | H5    | -3.460981E-05 | 1.179006E-04  | 1.076225E-04  |
| 26    | H7    | -5.668086E-05 | 1.274230E-05  | 2.399314E-06  |
| 27    | H8    | -2.503916E-05 | -1.818965E-05 | -9.525772E-05 |
| 28    | H9    | -6.442969E-05 | 1.802301E-05  | -1.209761E-05 |
| 29    | H10   | 1.346558E-05  | 2.416650E-05  | 2.960450E-05  |
| 30    | H19   | -1.897929E-04 | 1.508450E-04  | -1.976906E-05 |
| 31    | H20   | -8.748547E-05 | 1.919435E-06  | -2.239334E-06 |
| 32    | H21   | 4.575604E-05  | 7.082458E-05  | -1.291513E-04 |
| 33    | H22   | -2.398281E-05 | -1.698642E-05 | -1.164509E-05 |
| 34    | H11   | -1.125323E-04 | 7.734529E-05  | 8.992237E-05  |
| 35    | H12   | 1.381562E-05  | -2.480412E-05 | 7.722300E-05  |
| 36    | H13   | 2.164018E-04  | -3.414594E-05 | 1.084480E-04  |
| total |       | -7.449070E-04 | 1.055542E-03  | -2.539613E-04 |

end of program der1b

start of program geopt 23

geometry optimization step 23

reading input hessian of dimension 108

in five columns format

reading input hessian of dimension 108

in five columns format

Level shifts adjusted to satisfy step-size constraints

Step size: 0.0104114

Cos(theta): 0.5769708

Final level shift: -2.1612403E-02

energy change: -3.1731E-06 \* ( 5.0000E-05 )

gradient maximum: 8.7985E-04 . ( 4.5000E-04 )

gradient rms: 1.6127E-04 \* ( 3.0000E-04 )

step size: 0.01041 trust radius: 0.01000

displacement maximum: 5.3754E-03 . ( 1.8000E-03 )

displacement rms: 9.4260E-04 \* ( 1.2000E-03 )

predicted energy change: -6.5215E-06 geom step: 1.0411E-

02 full step: 1.0411E-02

molecular structure not yet converged...

center of mass moved by:

x: 1.2579E-03 y: 4.7140E-04 z: -6.3420E-04

new geometry:

|      | angstroms     |               |               |
|------|---------------|---------------|---------------|
| atom | x             | y             | z             |
| H1   | -1.1816446534 | 1.8860188338  | -2.2320885598 |
| C1   | -1.0988308566 | 2.1194141523  | -1.1842049520 |
| C2   | -0.8815693026 | 2.6959102616  | 1.5027623991  |
| C3   | -0.8793851855 | 1.0859276017  | -0.2887051317 |
| C4   | -1.2033638261 | 3.4342905921  | -0.7612244278 |
| C5   | -1.0948884741 | 3.7144464052  | 0.5884118539  |
| C6   | -0.7672586342 | 1.3773786532  | 1.0727619828  |
| C7   | -0.7875246295 | -0.3535936423 | -0.7556999900 |
| H3   | -1.3694746100 | 4.2223385591  | -1.4734216231 |
| H4   | -1.1801742422 | 4.7271379584  | 0.9411857885  |
| H6   | -0.8116216846 | 2.9354342423  | 2.5458768303  |
| C16  | 0.6121905304  | -0.7647189853 | -1.2108474660 |
| C8   | -1.3965841893 | -1.2512669058 | 0.3441333065  |
| N2   | -0.5113647159 | 0.3380794758  | 1.9940939242  |
| C9   | -0.7791067321 | -0.9773815422 | 1.7054060916  |
| C10  | 0.0007927325  | 0.6560275462  | 3.3198175565  |
| O1   | -0.5731796269 | -1.8514631705 | 2.4991142258  |
| C23  | -1.3863602017 | -2.7428795023 | 0.0254239622  |
| C18  | 3.1395358234  | -1.5822072954 | -2.0962180229 |
| C19  | 0.7601458020  | -1.4811979517 | -2.3935737757 |
| C20  | 1.7583763239  | -0.4539639278 | -0.4830123904 |
| C21  | 3.0076112244  | -0.8619491044 | -0.9189251455 |
| C22  | 2.0097727254  | -1.8882992039 | -2.8348984867 |
| H2   | -0.1101211313 | -1.7261351586 | -2.9783475197 |
| H5   | 1.6822379420  | 0.1157928183  | 0.4244442004  |
| H7   | 3.8790653710  | -0.6131773248 | -0.3390483679 |
| H8   | 2.0971294650  | -2.4414102478 | -3.7538805512 |
| H9   | 4.1113598146  | -1.8960676301 | -2.4343044753 |
| H10  | -1.4345549296 | -0.4552095349 | -1.6204796491 |

|     |               |               |               |
|-----|---------------|---------------|---------------|
| H19 | -0.3771008992 | -3.1286638251 | -0.0229127545 |
| H20 | -1.8691322668 | -2.9218045999 | -0.9306772532 |
| H21 | -1.9170387269 | -3.2945279056 | 0.7888262681  |
| H22 | -2.4333412917 | -0.9277555858 | 0.4433950528  |
| H11 | 0.8120194967  | 1.3694773054  | 3.2379328771  |
| H12 | 0.3622400391  | -0.2533320682 | 3.7675391697  |
| H13 | -0.7731139506 | 1.0736904080  | 3.9566629542  |

nuclear repulsion energy..... 1414.949804110 hartrees

-----  
 / end of geometry optimization iteration 23 /  
 -----

end of program geopt

start of program onee  
 smallest eigenvalue of S: 3.334E-04  
 number of canonical orbitals..... 368  
 end of program onee

start of program probe  
 end of program probe

start of program grid

number of gridpoints:

| atom     | H1  | C1  | C2  | C3  | C4  | C5  | C6  |
|----------|-----|-----|-----|-----|-----|-----|-----|
| C7       |     |     |     |     |     |     |     |
| grid # 1 | 72  | 87  | 89  | 89  | 89  | 88  | 84  |
| 81       |     |     |     |     |     |     |     |
| grid # 2 | 116 | 97  | 96  | 98  | 97  | 97  | 94  |
| 90       |     |     |     |     |     |     |     |
| grid # 3 | 217 | 182 | 184 | 194 | 183 | 184 | 189 |
| 177      |     |     |     |     |     |     |     |
| grid # 4 | 216 | 326 | 328 | 338 | 328 | 328 | 323 |
| 314      |     |     |     |     |     |     |     |

number of gridpoints:

| atom     | H3  | H4  | H6  | C16 | C8  | N2  | C9  |
|----------|-----|-----|-----|-----|-----|-----|-----|
| C10      |     |     |     |     |     |     |     |
| grid # 1 | 73  | 73  | 70  | 92  | 82  | 95  | 82  |
| 69       |     |     |     |     |     |     |     |
| grid # 2 | 118 | 118 | 112 | 100 | 90  | 105 | 92  |
| 79       |     |     |     |     |     |     |     |
| grid # 3 | 223 | 223 | 207 | 194 | 174 | 211 | 176 |
| 145      |     |     |     |     |     |     |     |
| grid # 4 | 224 | 223 | 207 | 342 | 311 | 387 | 293 |
| 276      |     |     |     |     |     |     |     |

```

number of gridpoints:
  atom      01      C23      C18      C19      C20      C21      C22
H2
  grid # 1      111      73      89      88      88      89      89
71
  grid # 2      123      80      97      95      96      97      96
112
  grid # 3      256      147      183      183      182      184      183
212
  grid # 4      450      286      327      326      327      327      327
211

```

```

number of gridpoints:
  atom      H5      H7      H8      H9      H10      H19      H20
H21
  grid # 1      71      73      73      73      66      71      71
70
  grid # 2      111      118      118      118      106      108      110
108
  grid # 3      212      223      223      224      202      218      217
217
  grid # 4      207      223      224      224      197      212      216
215

```

```

number of gridpoints:
  atom      H22      H11      H12      H13      total
grid # 1      69      71      70      71      2862
grid # 2      110      109      107      111      3729
grid # 3      214      215      213      217      7188
grid # 4      211      211      209      218      9912

```

end of program grid

start of program rwr  
end of program rwr

start of program scf

|      | i | u | d | i | g |                  | energy  | RMS     | maximum |
|------|---|---|---|---|---|------------------|---------|---------|---------|
|      | t | p | i | c | r |                  | change  | density | DIIS    |
|      | e | d | i | u | i | total energy     |         | change  | error   |
|      | r | t | s | t | d |                  |         |         |         |
| etot | 1 | N | N | 1 | U | -783.03321038208 |         | 1.4E-05 | 5.2E-04 |
| etot | 2 | Y | Y | 4 | M | -783.03324043608 | 3.0E-05 | 5.8E-06 | 1.4E-04 |
| etot | 3 | Y | Y | 4 | M | -783.03324163186 | 1.2E-06 | 1.9E-06 | 2.6E-05 |
| etot | 4 | Y | N | 4 | M | -783.03324220777 | 5.8E-07 | 0.0E+00 | 0.0E+00 |

Energy components, in hartrees:



(A) Nuclear repulsion..... 1414.94980411001  
(E) Total one-electron terms..... -3874.46676102956  
(I) Total two-electron terms..... 1676.48371471178  
(L) Electronic energy..... -2197.98304631778 (E+I)  
(N) Total energy..... -783.03324220777 (A+L)

SCFE: SCF energy: HF -783.03324220777 hartrees iterations:  
4

HOMO energy: -0.30201  
LUMO energy: 0.12922

Orbital energies:

|           |           |           |           |           |           |
|-----------|-----------|-----------|-----------|-----------|-----------|
| -20.52677 | -15.60051 | -11.34603 | -11.28611 | -11.25664 | -11.24997 |
| -11.24297 | -11.24158 | -11.24056 | -11.23856 | -11.23790 | -11.23493 |
| -11.23124 | -11.23053 | -11.22999 | -11.22957 | -11.22854 | -11.22774 |
| -11.20889 | -1.39762  | -1.26972  | -1.16509  | -1.14895  | -1.10606  |
| -1.03011  | -1.01862  | -1.01785  | -1.01274  | -0.96260  | -0.93279  |
| -0.85824  | -0.83906  | -0.83328  | -0.82167  | -0.79611  | -0.74121  |
| -0.71105  | -0.69498  | -0.67294  | -0.66430  | -0.64461  | -0.63758  |
| -0.62744  | -0.61486  | -0.61226  | -0.60856  | -0.59696  | -0.58337  |
| -0.57631  | -0.55327  | -0.54885  | -0.54070  | -0.53111  | -0.51905  |
| -0.51490  | -0.50725  | -0.50102  | -0.49777  | -0.48458  | -0.46869  |
| -0.46286  | -0.42171  | -0.41157  | -0.34258  | -0.33296  | -0.32284  |
| -0.30201  | 0.12922   | 0.13402   | 0.14455   | 0.15235   | 0.20397   |
| 0.22976   | 0.24106   | 0.24880   | 0.26128   | 0.28806   |           |

end of program scf

start of program derla  
end of program derla

start of program rwr  
end of program rwr

start of program der1b

forces (hartrees/bohr) : total

| atom | label | x             | y             | z             |
|------|-------|---------------|---------------|---------------|
| 1    | H1    | -2.070945E-05 | 4.024664E-05  | -3.696400E-05 |
| 2    | C1    | -1.211440E-05 | 8.045173E-05  | 1.551131E-05  |
| 3    | C2    | -5.851773E-05 | -9.877886E-05 | -6.424861E-05 |
| 4    | C3    | -7.218233E-06 | 1.493799E-04  | 2.489292E-05  |
| 5    | C4    | -1.864256E-05 | -1.193946E-04 | -1.297161E-04 |
| 6    | C5    | 1.723854E-05  | -4.299501E-05 | 8.576822E-05  |
| 7    | C6    | -1.601198E-04 | 3.097136E-04  | -1.518652E-04 |

|       |       |               |               |               |
|-------|-------|---------------|---------------|---------------|
| 8     | C7    | 9.039535E-05  | -4.495661E-06 | 2.631682E-05  |
| 9     | H3    | -1.316263E-05 | 4.992671E-05  | -3.764982E-05 |
| 10    | H4    | -1.012040E-05 | 5.264121E-05  | -5.212269E-06 |
| 11    | H6    | -9.797036E-06 | 9.606623E-06  | 1.643370E-05  |
| 12    | C16   | 1.822479E-05  | 1.347772E-04  | 8.770785E-05  |
| 13    | C8    | 2.804277E-05  | 2.761058E-05  | -8.357224E-05 |
| 14    | N2    | 1.735992E-04  | 4.445849E-04  | 9.831983E-04  |
| 15    | C9    | -9.363108E-05 | -5.491115E-05 | -5.715093E-04 |
| 16    | C10   | 4.681529E-05  | 1.249793E-04  | -6.740218E-05 |
| 17    | O1    | -1.078267E-04 | -3.223177E-04 | 2.676191E-04  |
| 18    | C23   | -2.016860E-04 | 2.788180E-04  | -1.415645E-04 |
| 19    | C18   | 1.041047E-04  | 3.690554E-05  | 2.358251E-05  |
| 20    | C19   | -2.305009E-04 | 1.160960E-04  | 9.775743E-05  |
| 21    | C20   | -2.570654E-04 | 6.235023E-05  | -1.054657E-05 |
| 22    | C21   | -5.126104E-05 | -1.409648E-05 | -7.187286E-05 |
| 23    | C22   | 1.198616E-04  | -6.656572E-05 | -1.202745E-04 |
| 24    | H2    | -9.084589E-05 | 1.739289E-05  | -4.508372E-05 |
| 25    | H5    | 8.936467E-06  | -5.774461E-05 | -7.264259E-05 |
| 26    | H7    | 8.927311E-05  | 4.853633E-05  | 2.010690E-05  |
| 27    | H8    | -7.709163E-06 | 3.583026E-05  | 1.809475E-05  |
| 28    | H9    | 5.218324E-05  | 2.479653E-05  | -1.890401E-05 |
| 29    | H10   | -7.345051E-05 | 2.019126E-05  | -7.734345E-05 |
| 30    | H19   | 4.623240E-04  | -2.116910E-04 | -5.541436E-05 |
| 31    | H20   | -9.581257E-06 | 8.544252E-05  | -1.137165E-04 |
| 32    | H21   | -2.332082E-04 | -1.470636E-04 | 2.808667E-04  |
| 33    | H22   | -2.439216E-04 | 9.240509E-05  | 2.349342E-05  |
| 34    | H11   | -1.495754E-04 | -7.325640E-05 | -7.276418E-05 |
| 35    | H12   | 1.136216E-04  | 8.450404E-05  | -6.962532E-05 |
| 36    | H13   | -2.038626E-05 | -5.169248E-05 | -2.480026E-04 |
| ----- |       | -----         | -----         | -----         |
|       | total | -7.564309E-04 | 1.062184E-03  | -2.945450E-04 |

end of program der1b

start of program geopt 24

geometry optimization step 24

reading input hessian of dimension 108

in five columns format

reading input hessian of dimension 108

in five columns format

Level shifts adjusted to satisfy step-size constraints

Step size: 0.0103362

Cos(theta): 0.7418847

Final level shift: -5.9053150E-02

energy change: -6.4003E-06 \* ( 5.0000E-05 )

gradient maximum: 6.3424E-04 . ( 4.5000E-04 )

S398

gradient rms: 1.5766E-04 \* ( 3.0000E-04 )  
 step size: 0.01034 trust radius: 0.01000  
 displacement maximum: 4.7916E-03 . ( 1.8000E-03 )  
 displacement rms: 9.3580E-04 \* ( 1.2000E-03 )  
 predicted energy change: -9.8314E-06 geom step: 1.0336E-02  
 full step: 1.0336E-02  
 molecular structure not yet converged...

center of mass moved by:  
 x: -1.3819E-03 y: -2.5555E-04 z: 6.7702E-04

new geometry:

|      | angstroms     |               |               |
|------|---------------|---------------|---------------|
| atom | x             | y             | z             |
| H1   | -1.1807662982 | 1.8856546836  | -2.2324339186 |
| C1   | -1.0985716874 | 2.1190663819  | -1.1844790358 |
| C2   | -0.8823965292 | 2.6953781592  | 1.5027534870  |
| C3   | -0.8800839607 | 1.0857690408  | -0.2886561974 |
| C4   | -1.2026989145 | 3.4337393358  | -0.7615758193 |
| C5   | -1.0946422101 | 3.7138668991  | 0.5882588199  |
| C6   | -0.7686879634 | 1.3771365281  | 1.0728545222  |
| C7   | -0.7876740786 | -0.3537518831 | -0.7557479976 |
| H3   | -1.3678671160 | 4.2219535647  | -1.4738317131 |
| H4   | -1.1793917086 | 4.7266655453  | 0.9408812366  |
| H6   | -0.8124043991 | 2.9345532630  | 2.5459876453  |
| C16  | 0.6123021076  | -0.7644310328 | -1.2102547600 |
| C8   | -1.3980075808 | -1.2512844801 | 0.3434497722  |
| N2   | -0.5118013241 | 0.3379589468  | 1.9949245623  |
| C9   | -0.7809287899 | -0.9779496153 | 1.7051040694  |
| C10  | 0.0066637971  | 0.6570697614  | 3.3167062714  |
| O1   | -0.5774509001 | -1.8526661559 | 2.4992023315  |
| C23  | -1.3869939935 | -2.7431586895 | 0.0248811929  |
| C18  | 3.1409487851  | -1.5809233104 | -2.0950441477 |
| C19  | 0.7610481805  | -1.4799405014 | -2.3934595659 |
| C20  | 1.7579703603  | -0.4547311572 | -0.4816177477 |
| C21  | 3.0078053971  | -0.8618880144 | -0.9172769401 |
| C22  | 2.0114262547  | -1.8866939350 | -2.8344081754 |
| H2   | -0.1089117793 | -1.7244399139 | -2.9791423755 |
| H5   | 1.6815762001  | 0.1131967911  | 0.4266286700  |
| H7   | 3.8790778544  | -0.6131220071 | -0.3367885296 |
| H8   | 2.0993641944  | -2.4391128962 | -3.7535821537 |
| H9   | 4.1132954654  | -1.8939255165 | -2.4327621039 |
| H10  | -1.4341937564 | -0.4552121303 | -1.6211777235 |
| H19  | -0.3769739184 | -3.1307475786 | -0.0187880168 |
| H20  | -1.8646568895 | -2.9209082637 | -0.9340950704 |
| H21  | -1.9225416771 | -3.2945938238 | 0.7861813177  |
| H22  | -2.4351583627 | -0.9274785072 | 0.4420193319  |
| H11  | 0.8160139954  | 1.3716652852  | 3.2291481396  |
| H12  | 0.3731739390  | -0.2509830623 | 3.7628598241  |
| H13  | -0.7657941424 | 1.0734962138  | 3.9557012265  |

nuclear repulsion energy..... 1414.931929768 hartrees

-----  
/ end of geometry optimization iteration 24 /  
-----

end of program geopt

start of program onee  
smallest eigenvalue of S: 3.333E-04  
number of canonical orbitals..... 368  
end of program onee

start of program probe  
end of program probe

start of program grid

number of gridpoints:

|     | atom     | H1  | C1  | C2  | C3  | C4  | C5  | C6  |
|-----|----------|-----|-----|-----|-----|-----|-----|-----|
| C7  |          |     |     |     |     |     |     |     |
|     | grid # 1 | 72  | 87  | 89  | 89  | 89  | 88  | 84  |
| 81  |          |     |     |     |     |     |     |     |
|     | grid # 2 | 116 | 97  | 96  | 98  | 97  | 97  | 94  |
| 90  |          |     |     |     |     |     |     |     |
|     | grid # 3 | 217 | 182 | 184 | 194 | 183 | 184 | 189 |
| 177 |          |     |     |     |     |     |     |     |
|     | grid # 4 | 216 | 326 | 328 | 338 | 328 | 328 | 323 |
| 314 |          |     |     |     |     |     |     |     |

number of gridpoints:

|     | atom     | H3  | H4  | H6  | C16 | C8  | N2  | C9  |
|-----|----------|-----|-----|-----|-----|-----|-----|-----|
| C10 |          |     |     |     |     |     |     |     |
|     | grid # 1 | 73  | 73  | 70  | 92  | 82  | 95  | 82  |
| 69  |          |     |     |     |     |     |     |     |
|     | grid # 2 | 118 | 118 | 112 | 100 | 90  | 105 | 92  |
| 78  |          |     |     |     |     |     |     |     |
|     | grid # 3 | 223 | 223 | 207 | 194 | 174 | 211 | 176 |
| 146 |          |     |     |     |     |     |     |     |
|     | grid # 4 | 224 | 223 | 207 | 342 | 311 | 387 | 293 |
| 276 |          |     |     |     |     |     |     |     |

number of gridpoints:

|     | atom     | O1  | C23 | C18 | C19 | C20 | C21 | C22 |
|-----|----------|-----|-----|-----|-----|-----|-----|-----|
| H2  |          |     |     |     |     |     |     |     |
|     | grid # 1 | 111 | 73  | 89  | 88  | 88  | 89  | 89  |
| 71  |          |     |     |     |     |     |     |     |
|     | grid # 2 | 123 | 80  | 97  | 95  | 96  | 97  | 96  |
| 112 |          |     |     |     |     |     |     |     |
|     | grid # 3 | 256 | 149 | 183 | 183 | 182 | 184 | 183 |
| 212 |          |     |     |     |     |     |     |     |

grid # 4      450      288      327      326      327      327      327  
 211

number of gridpoints:

| atom     | H5  | H7  | H8  | H9  | H10 | H19 | H20 |
|----------|-----|-----|-----|-----|-----|-----|-----|
| grid # 1 | 71  | 73  | 73  | 73  | 67  | 71  | 71  |
| grid # 2 | 111 | 118 | 118 | 118 | 106 | 108 | 110 |
| grid # 3 | 212 | 223 | 223 | 224 | 202 | 218 | 216 |
| grid # 4 | 207 | 223 | 224 | 224 | 196 | 212 | 216 |

number of gridpoints:

| atom     | H22 | H11 | H12 | H13 | total |
|----------|-----|-----|-----|-----|-------|
| grid # 1 | 69  | 71  | 70  | 71  | 2863  |
| grid # 2 | 110 | 109 | 107 | 111 | 3728  |
| grid # 3 | 214 | 214 | 213 | 217 | 7189  |
| grid # 4 | 211 | 211 | 209 | 218 | 9913  |

end of program grid

start of program rwr

end of program rwr

start of program scf

|      | i | u | d | i | g |                  | RMS     | maximum |
|------|---|---|---|---|---|------------------|---------|---------|
|      | t | p | i | c | r |                  | energy  | DIIS    |
|      | e | d | i | u | i | total energy     | density | error   |
|      | r | t | s | t | d |                  | change  |         |
| etot | 1 | N | N | 1 | U | -783.03320679670 | 1.3E-05 | 4.3E-04 |
| etot | 2 | Y | Y | 4 | M | -783.03323432207 | 2.8E-05 | 1.2E-04 |
| etot | 3 | Y | Y | 4 | M | -783.03323964878 | 5.3E-06 | 2.5E-05 |
| etot | 4 | Y | N | 4 | M | -783.03323983242 | 1.8E-07 | 0.0E+00 |

Energy components, in hartrees:

|     |                               |                   |       |
|-----|-------------------------------|-------------------|-------|
| (A) | Nuclear repulsion.....        | 1414.93192976811  |       |
| (E) | Total one-electron terms..... | -3874.43430858270 |       |
| (I) | Total two-electron terms..... | 1676.46913898216  |       |
| (L) | Electronic energy.....        | -2197.96516960053 | (E+I) |
| (N) | Total energy.....             | -783.03323983242  | (A+L) |

SCFE: SCF energy: HF      -783.03323983242 hartrees      iterations:

4

HOMO energy: -0.30202  
LUMO energy: 0.12924

Orbital energies:

|           |           |           |           |           |           |
|-----------|-----------|-----------|-----------|-----------|-----------|
| -20.52693 | -15.60030 | -11.34609 | -11.28587 | -11.25654 | -11.24990 |
| -11.24308 | -11.24145 | -11.24047 | -11.23863 | -11.23788 | -11.23485 |
| -11.23140 | -11.23059 | -11.23008 | -11.22974 | -11.22863 | -11.22763 |
| -11.20919 | -1.39732  | -1.26953  | -1.16508  | -1.14897  | -1.10603  |
| -1.03004  | -1.01865  | -1.01788  | -1.01267  | -0.96258  | -0.93268  |
| -0.85811  | -0.83888  | -0.83329  | -0.82168  | -0.79607  | -0.74109  |
| -0.71100  | -0.69499  | -0.67287  | -0.66427  | -0.64455  | -0.63762  |
| -0.62742  | -0.61487  | -0.61226  | -0.60859  | -0.59705  | -0.58329  |
| -0.57633  | -0.55331  | -0.54870  | -0.54062  | -0.53104  | -0.51896  |
| -0.51491  | -0.50720  | -0.50099  | -0.49778  | -0.48459  | -0.46861  |
| -0.46287  | -0.42154  | -0.41153  | -0.34261  | -0.33291  | -0.32292  |
| -0.30202  | 0.12924   | 0.13404   | 0.14448   | 0.15237   | 0.20382   |
| 0.22969   | 0.24102   | 0.24863   | 0.26129   | 0.28787   |           |

end of program scf

start of program derla  
end of program derla

start of program rwr  
end of program rwr

start of program derlb

forces (hartrees/bohr) : total

| atom | label | x             | y             | z             |
|------|-------|---------------|---------------|---------------|
| 1    | H1    | -1.830432E-05 | 2.859732E-05  | 1.799449E-06  |
| 2    | C1    | -4.225191E-05 | 3.026880E-05  | -5.166108E-05 |
| 3    | C2    | -8.924106E-05 | 1.426865E-04  | 4.865788E-05  |
| 4    | C3    | 3.186071E-05  | -8.915463E-05 | -1.801414E-05 |
| 5    | C4    | -9.228697E-06 | 1.322182E-04  | 7.897200E-05  |
| 6    | C5    | -4.994730E-05 | 9.639113E-05  | -8.425225E-05 |
| 7    | C6    | 1.909008E-04  | -1.367827E-04 | 2.604393E-05  |
| 8    | C7    | -1.444191E-04 | 8.844947E-05  | -7.431758E-05 |
| 9    | H3    | -2.358052E-05 | 2.762505E-05  | -2.190934E-06 |
| 10   | H4    | -2.299433E-05 | 2.387232E-05  | -1.594406E-05 |
| 11   | H6    | -4.232650E-05 | 5.906493E-05  | -2.864193E-05 |
| 12   | C16   | -1.094051E-04 | -5.524783E-05 | -2.889432E-05 |
| 13   | C8    | 1.601065E-04  | 2.672291E-05  | 8.991977E-07  |
| 14   | N2    | -1.830085E-04 | -2.532448E-04 | -7.895700E-04 |
| 15   | C9    | -1.147255E-04 | 1.488745E-04  | 4.702422E-04  |
| 16   | C10   | -5.628888E-05 | -7.425619E-05 | 1.035672E-04  |

S402

|       |       |               |               |               |
|-------|-------|---------------|---------------|---------------|
| 17    | O1    | 5.280779E-05  | 3.317606E-04  | -1.093195E-04 |
| 18    | C23   | 9.574981E-05  | -1.351086E-04 | 7.925995E-05  |
| 19    | C18   | -6.525682E-05 | 4.204676E-06  | -5.620663E-05 |
| 20    | C19   | 1.295488E-04  | -5.038010E-05 | -1.344954E-04 |
| 21    | C20   | 1.407837E-04  | -7.205440E-06 | -2.976252E-05 |
| 22    | C21   | -2.045950E-05 | 9.271159E-05  | 6.276487E-05  |
| 23    | C22   | -1.671824E-04 | 8.438955E-05  | 5.867880E-05  |
| 24    | H2    | 2.773290E-05  | 3.459095E-05  | 2.461389E-05  |
| 25    | H5    | -3.896956E-05 | 1.323024E-04  | 9.872315E-05  |
| 26    | H7    | -5.513480E-05 | 1.895928E-05  | -1.355676E-06 |
| 27    | H8    | -2.681121E-05 | -1.571614E-06 | -5.494645E-05 |
| 28    | H9    | -6.626943E-05 | 2.257754E-05  | -7.835577E-06 |
| 29    | H10   | 1.589811E-05  | 3.510932E-05  | 3.253099E-05  |
| 30    | H19   | -2.933243E-04 | 1.877127E-04  | 1.761686E-05  |
| 31    | H20   | -8.227229E-05 | -1.239004E-05 | 1.794728E-05  |
| 32    | H21   | 9.491791E-05  | 1.067485E-04  | -1.875586E-04 |
| 33    | H22   | 3.766051E-05  | -3.179320E-05 | -1.313377E-05 |
| 34    | H11   | -1.021985E-04 | 9.925423E-05  | 7.489152E-05  |
| 35    | H12   | -3.562978E-05 | -3.779806E-05 | 6.234155E-05  |
| 36    | H13   | 1.401746E-04  | 1.704115E-06  | 1.640490E-04  |
| ----- |       | -----         | -----         | -----         |
|       | total | -7.410881E-04 | 1.071863E-03  | -2.645007E-04 |

end of program derlb

start of program geopt 25

geometry optimization step 25

reading input hessian of dimension 108

in five columns format

reading input hessian of dimension 108

in five columns format

Level shifts adjusted to satisfy step-size constraints

Step size: 0.0102317

Cos(theta): 0.6059804

Final level shift: -2.3824706E-02

energy change: 2.3754E-06 # ( 5.0000E-05 )

gradient maximum: 8.1317E-04 . ( 4.5000E-04 )

gradient rms: 1.4988E-04 \* ( 3.0000E-04 )

step size: 0.01023 trust radius: 0.01000

displacement maximum: 5.2594E-03 . ( 1.8000E-03 )

displacement rms: 9.2634E-04 \* ( 1.2000E-03 )

predicted energy change: -6.3792E-06 geom step: 1.0232E-

02 full step: 1.0232E-02

molecular structure not yet converged...

center of mass moved by:

x: 1.2182E-03 y: 3.4642E-04 z: -5.8767E-04

new geometry:

|      | angstroms     |               |               |
|------|---------------|---------------|---------------|
| atom | x             | y             | z             |
| H1   | -1.1804039999 | 1.8865506765  | -2.2321161448 |
| C1   | -1.0979458841 | 2.1197950781  | -1.1841695308 |
| C2   | -0.8819504447 | 2.6959285010  | 1.5030521132  |
| C3   | -0.8788485557 | 1.0861911235  | -0.2887056689 |
| C4   | -1.2026072373 | 3.4346008623  | -0.7610151555 |
| C5   | -1.0948903805 | 3.7145786646  | 0.5887517103  |
| C6   | -0.7670907831 | 1.3775304400  | 1.0728369744  |
| C7   | -0.7872096931 | -0.3533403156 | -0.7558015319 |
| H3   | -1.3683433801 | 4.2227566651  | -1.4731740552 |
| H4   | -1.1804898951 | 4.7272053034  | 0.9416326705  |
| H6   | -0.8127601577 | 2.9352172217  | 2.5462784971  |
| C16  | 0.6123887781  | -0.7647773781 | -1.2109875094 |
| C8   | -1.3964571306 | -1.2510942485 | 0.3438880080  |
| N2   | -0.5110583369 | 0.3381466621  | 1.9940124708  |
| C9   | -0.7798538937 | -0.9772134846 | 1.7055811761  |
| C10  | 0.0006682762  | 0.6556728136  | 3.3199788976  |
| O1   | -0.5755243984 | -1.8512285594 | 2.4998410184  |
| C23  | -1.3859666216 | -2.7427352095 | 0.0250221901  |
| C18  | 3.1395517459  | -1.5828649472 | -2.0964423291 |
| C19  | 0.7600496513  | -1.4823634202 | -2.3930217741 |
| C20  | 1.7587733744  | -0.4530588405 | -0.4839983115 |
| C21  | 3.0079124307  | -0.8613390850 | -0.9199334996 |
| C22  | 2.0095783115  | -1.8898139852 | -2.8343669658 |
| H2   | -0.1103932559 | -1.7280220538 | -2.9771487571 |
| H5   | 1.6828978627  | 0.1178816238  | 0.4228049323  |
| H7   | 3.8796020456  | -0.6117888706 | -0.3406665742 |
| H8   | 2.0966889948  | -2.4438662875 | -3.7527428332 |
| H9   | 4.1113207918  | -1.8969667362 | -2.4345012726 |
| H10  | -1.4342215798 | -0.4546959930 | -1.6206318894 |
| H19  | -0.3765530833 | -3.1279792487 | -0.0247516341 |
| H20  | -1.8699136387 | -2.9218102920 | -0.9304891969 |
| H21  | -1.9153998233 | -3.2947182580 | 0.7890333473  |
| H22  | -2.4334141616 | -0.9279086722 | 0.4427811939  |
| H11  | 0.8088853669  | 1.3723792940  | 3.2387163939  |
| H12  | 0.3661605644  | -0.2531570552 | 3.7656532029  |
| H13  | -0.7743209064 | 1.0689365450  | 3.9584155598  |

nuclear repulsion energy..... 1414.915862762 hartrees

-----  
/ end of geometry optimization iteration 25 /  
-----

end of program geopt

start of program onee  
smallest eigenvalue of S: 3.334E-04

S404



number of canonical orbitals..... 368  
end of program onee

start of program probe  
end of program probe

start of program grid

number of gridpoints:

| atom     | H1  | C1  | C2  | C3  | C4  | C5  | C6  |
|----------|-----|-----|-----|-----|-----|-----|-----|
| C7       |     |     |     |     |     |     |     |
| grid # 1 | 72  | 87  | 89  | 89  | 89  | 88  | 84  |
| 81       |     |     |     |     |     |     |     |
| grid # 2 | 116 | 97  | 96  | 98  | 97  | 97  | 94  |
| 90       |     |     |     |     |     |     |     |
| grid # 3 | 217 | 182 | 184 | 194 | 183 | 184 | 189 |
| 177      |     |     |     |     |     |     |     |
| grid # 4 | 216 | 326 | 328 | 338 | 328 | 328 | 324 |
| 314      |     |     |     |     |     |     |     |

number of gridpoints:

| atom     | H3  | H4  | H6  | C16 | C8  | N2  | C9  |
|----------|-----|-----|-----|-----|-----|-----|-----|
| C10      |     |     |     |     |     |     |     |
| grid # 1 | 73  | 73  | 70  | 92  | 82  | 95  | 82  |
| 69       |     |     |     |     |     |     |     |
| grid # 2 | 118 | 118 | 112 | 100 | 90  | 105 | 92  |
| 79       |     |     |     |     |     |     |     |
| grid # 3 | 223 | 223 | 207 | 194 | 174 | 211 | 176 |
| 145      |     |     |     |     |     |     |     |
| grid # 4 | 224 | 223 | 207 | 342 | 311 | 387 | 293 |
| 275      |     |     |     |     |     |     |     |

number of gridpoints:

| atom     | O1  | C23 | C18 | C19 | C20 | C21 | C22 |
|----------|-----|-----|-----|-----|-----|-----|-----|
| H2       |     |     |     |     |     |     |     |
| grid # 1 | 111 | 73  | 89  | 88  | 88  | 89  | 89  |
| 71       |     |     |     |     |     |     |     |
| grid # 2 | 123 | 80  | 97  | 95  | 96  | 97  | 96  |
| 112      |     |     |     |     |     |     |     |
| grid # 3 | 256 | 145 | 183 | 183 | 182 | 184 | 183 |
| 212      |     |     |     |     |     |     |     |
| grid # 4 | 450 | 284 | 327 | 326 | 327 | 327 | 327 |
| 211      |     |     |     |     |     |     |     |

number of gridpoints:

| atom     | H5 | H7 | H8 | H9 | H10 | H19 | H20 |
|----------|----|----|----|----|-----|-----|-----|
| H21      |    |    |    |    |     |     |     |
| grid # 1 | 71 | 73 | 73 | 73 | 66  | 71  | 71  |
| 70       |    |    |    |    |     |     |     |

```

  grid # 2      111    118    118    118    106    108    110
108
  grid # 3      212    223    223    224    203    218    217
217
  grid # 4      207    223    224    224    196    212    216
215

```

number of gridpoints:

| atom     | H22 | H11 | H12 | H13 | total |
|----------|-----|-----|-----|-----|-------|
| grid # 1 | 69  | 71  | 70  | 71  | 2862  |
| grid # 2 | 110 | 109 | 107 | 111 | 3729  |
| grid # 3 | 214 | 215 | 213 | 217 | 7187  |
| grid # 4 | 211 | 211 | 209 | 218 | 9909  |

end of program grid

start of program rwr

end of program rwr

start of program scf

|      | i | u | d | i | g |                  | RMS     | maximum |
|------|---|---|---|---|---|------------------|---------|---------|
|      | t | p | i | c | r |                  | energy  | DIIS    |
|      | e | d | i | u | i | total energy     | change  | error   |
|      | r | t | s | t | d |                  | density |         |
|      |   |   |   |   |   |                  | change  |         |
| etot | 1 | N | N | 1 | U | -783.03320867731 | 1.5E-05 | 4.6E-04 |
| etot | 2 | Y | Y | 4 | M | -783.03324156469 | 3.3E-05 | 1.5E-04 |
| etot | 3 | Y | Y | 4 | M | -783.03324292046 | 1.4E-06 | 4.5E-05 |
| etot | 4 | Y | N | 4 | M | -783.03324297419 | 5.4E-08 | 0.0E+00 |

Energy components, in hartrees:

|     |                               |                   |       |
|-----|-------------------------------|-------------------|-------|
| (A) | Nuclear repulsion.....        | 1414.91586276151  |       |
| (E) | Total one-electron terms..... | -3874.39868431811 |       |
| (I) | Total two-electron terms..... | 1676.44957858241  |       |
| (L) | Electronic energy.....        | -2197.94910573570 | (E+I) |
| (N) | Total energy.....             | -783.03324297419  | (A+L) |

SCFE: SCF energy: HF -783.03324297419 hartrees iterations:  
4

HOMO energy: -0.30201  
LUMO energy: 0.12924

Orbital energies:

|           |           |           |           |           |           |
|-----------|-----------|-----------|-----------|-----------|-----------|
| -20.52676 | -15.60052 | -11.34604 | -11.28612 | -11.25664 | -11.24998 |
| -11.24299 | -11.24159 | -11.24055 | -11.23856 | -11.23791 | -11.23493 |
| -11.23123 | -11.23053 | -11.22999 | -11.22956 | -11.22853 | -11.22775 |

|           |          |          |          |          |          |
|-----------|----------|----------|----------|----------|----------|
| -11.20889 | -1.39759 | -1.26972 | -1.16510 | -1.14896 | -1.10605 |
| -1.03011  | -1.01863 | -1.01786 | -1.01273 | -0.96259 | -0.93279 |
| -0.85825  | -0.83906 | -0.83330 | -0.82168 | -0.79611 | -0.74121 |
| -0.71104  | -0.69499 | -0.67292 | -0.66430 | -0.64462 | -0.63756 |
| -0.62744  | -0.61487 | -0.61226 | -0.60855 | -0.59695 | -0.58336 |
| -0.57632  | -0.55330 | -0.54885 | -0.54071 | -0.53108 | -0.51906 |
| -0.51487  | -0.50724 | -0.50104 | -0.49776 | -0.48458 | -0.46869 |
| -0.46286  | -0.42171 | -0.41157 | -0.34260 | -0.33296 | -0.32286 |
| -0.30201  | 0.12924  | 0.13403  | 0.14452  | 0.15233  | 0.20396  |
| 0.22978   | 0.24105  | 0.24889  | 0.26127  | 0.28812  |          |

end of program scf

start of program derla  
end of program derla

start of program rwr  
end of program rwr

start of program derlb

forces (hartrees/bohr) : total

| atom | label | x             | y             | z             |
|------|-------|---------------|---------------|---------------|
| 1    | H1    | -1.968092E-05 | 4.059452E-05  | -3.563156E-05 |
| 2    | C1    | -1.255708E-05 | 7.480805E-05  | 3.533041E-05  |
| 3    | C2    | -5.516245E-05 | -9.554485E-05 | -7.483967E-05 |
| 4    | C3    | -9.093269E-06 | 1.432046E-04  | 3.770540E-05  |
| 5    | C4    | -1.865577E-05 | -1.090029E-04 | -1.124093E-04 |
| 6    | C5    | 1.392032E-05  | -4.752238E-05 | 6.120052E-05  |
| 7    | C6    | -1.558093E-04 | 2.806181E-04  | -1.856184E-04 |
| 8    | C7    | 9.596427E-05  | 9.012141E-06  | 4.135456E-05  |
| 9    | H3    | -1.770964E-05 | 5.355912E-05  | -3.810306E-05 |
| 10   | H4    | -1.481125E-05 | 5.542708E-05  | -6.612463E-06 |
| 11   | H6    | -9.518855E-06 | 7.658260E-06  | 2.089616E-05  |
| 12   | C16   | 8.574119E-06  | 1.763392E-04  | 8.667722E-05  |
| 13   | C8    | -4.729958E-05 | 4.342477E-06  | -8.939448E-05 |
| 14   | N2    | 1.368264E-04  | 3.484693E-04  | 9.745207E-04  |
| 15   | C9    | -7.617951E-05 | -6.249592E-05 | -5.650430E-04 |
| 16   | C10   | 3.414526E-05  | 2.479499E-05  | -3.665238E-05 |
| 17   | O1    | -9.572887E-05 | -2.294846E-04 | 2.216641E-04  |
| 18   | C23   | -1.836684E-04 | 2.948296E-04  | -1.526026E-04 |
| 19   | C18   | 1.263235E-04  | 4.044260E-05  | 2.862647E-05  |
| 20   | C19   | -2.016597E-04 | 8.703282E-05  | 6.904293E-05  |
| 21   | C20   | -2.180631E-04 | 1.044137E-04  | 6.654719E-05  |
| 22   | C21   | -1.275742E-05 | 1.242325E-06  | -1.717270E-05 |
| 23   | C22   | 7.379076E-05  | -5.504115E-05 | -1.213834E-04 |
| 24   | H2    | -1.105447E-04 | 1.738737E-05  | -7.875050E-05 |

|       |       |               |               |               |
|-------|-------|---------------|---------------|---------------|
| 25    | H5    | 1.038653E-05  | -1.008110E-04 | -9.540420E-05 |
| 26    | H7    | 5.883075E-05  | 3.648803E-05  | 1.589415E-05  |
| 27    | H8    | -1.226783E-05 | 2.464442E-05  | -2.462600E-05 |
| 28    | H9    | 4.165547E-05  | 2.361456E-05  | -1.889777E-05 |
| 29    | H10   | -7.754345E-05 | 1.437099E-05  | -7.315136E-05 |
| 30    | H19   | 4.502441E-04  | -2.163477E-04 | -3.872120E-05 |
| 31    | H20   | 5.440984E-06  | 9.974619E-05  | -1.031117E-04 |
| 32    | H21   | -2.365951E-04 | -1.384137E-04 | 2.866286E-04  |
| 33    | H22   | -2.064680E-04 | 1.008538E-04  | 1.928227E-05  |
| 34    | H11   | -8.850643E-05 | -3.358248E-05 | -7.412515E-05 |
| 35    | H12   | 9.804979E-05  | 1.226769E-04  | -5.995003E-05 |
| 36    | H13   | -2.832963E-05 | -3.824437E-05 | -2.658042E-04 |
| ----- |       |               |               |               |
|       | total | -7.544580E-04 | 1.060080E-03  | -3.026344E-04 |

end of program derlb

start of program geopt 26

geometry optimization step 26

reading input hessian of dimension 108  
in five columns format  
reading input hessian of dimension 108  
in five columns format

Level shifts adjusted to satisfy step-size constraints

Step size: 0.0108918  
Cos(theta): 0.7490567

Final level shift: -6.0844884E-02

energy change: -3.1418E-06 \* ( 5.0000E-05 )  
gradient maximum: 5.4728E-04 . ( 4.5000E-04 )  
gradient rms: 1.5681E-04 \* ( 3.0000E-04 )  
step size: 0.01089 trust radius: 0.01000  
displacement maximum: 4.6624E-03 . ( 1.8000E-03 )  
displacement rms: 9.8610E-04 \* ( 1.2000E-03 )  
predicted energy change: -1.0674E-05 geom step: 1.0892E-  
02 full step: 1.0892E-02  
molecular structure not yet converged...

center of mass moved by:

x: -1.3328E-03 y: -1.5413E-04 z: 6.1461E-04

new geometry:

|      |               |              |               | angstroms |  |  |
|------|---------------|--------------|---------------|-----------|--|--|
| atom | x             | y            | z             |           |  |  |
| H1   | -1.1803188283 | 1.8858310573 | -2.2325079196 |           |  |  |
| C1   | -1.0983798791 | 2.1192725182 | -1.1845309612 |           |  |  |
| C2   | -0.8831564903 | 2.6956058680 | 1.5027175681  |           |  |  |

S408

|     |               |               |               |
|-----|---------------|---------------|---------------|
| C3  | -0.8797272743 | 1.0860218070  | -0.2886596363 |
| C4  | -1.2030303125 | 3.4339084280  | -0.7616847240 |
| C5  | -1.0955651345 | 3.7140463716  | 0.5881847040  |
| C6  | -0.7685699692 | 1.3774337382  | 1.0727987054  |
| C7  | -0.7873243539 | -0.3534566287 | -0.7557698634 |
| H3  | -1.3683018364 | 4.2220668798  | -1.4740081869 |
| H4  | -1.1809588303 | 4.7268113952  | 0.9407854784  |
| H6  | -0.8138089817 | 2.9346992945  | 2.5460376806  |
| C16 | 0.6125121393  | -0.7642711640 | -1.2104786354 |
| C8  | -1.3976264175 | -1.2511533629 | 0.3433646243  |
| N2  | -0.5112137360 | 0.3382635108  | 1.9947919352  |
| C9  | -0.7811149874 | -0.9774632320 | 1.7052608228  |
| C10 | 0.0069698534  | 0.6572851155  | 3.3167423300  |
| O1  | -0.5785186953 | -1.8517728847 | 2.4999897344  |
| C23 | -1.3857702853 | -2.7430349910 | 0.0249957177  |
| C18 | 3.1406819904  | -1.5823214730 | -2.0950829409 |
| C19 | 0.7609597083  | -1.4791016507 | -2.3942363709 |
| C20 | 1.7582260179  | -0.4561233930 | -0.4811421254 |
| C21 | 3.0078432614  | -0.8641262558 | -0.9166963416 |
| C22 | 2.0111124135  | -1.8864903192 | -2.8351648413 |
| H2  | -0.1090809114 | -1.7226091469 | -2.9803378334 |
| H5  | 1.6819419650  | 0.1107617304  | 0.4277125316  |
| H7  | 3.8791163772  | -0.6167474193 | -0.3356639889 |
| H8  | 2.0988542728  | -2.4382308726 | -3.7548604062 |
| H9  | 4.1128218546  | -1.8960089505 | -2.4327558471 |
| H10 | -1.4339854287 | -0.4548952199 | -1.6211161311 |
| H19 | -0.3754689921 | -3.1299660689 | -0.0192357913 |
| H20 | -1.8637814836 | -2.9210961325 | -0.9337706651 |
| H21 | -1.9206134298 | -3.2947414841 | 0.7866483229  |
| H22 | -2.4349632292 | -0.9278435712 | 0.4416480536  |
| H11 | 0.8137516468  | 1.3748090643  | 3.2295507584  |
| H12 | 0.3771305267  | -0.2499480191 | 3.7614906919  |
| H13 | -0.7663915561 | 1.0701501320  | 3.9568907157  |

nuclear repulsion energy..... 1414.909215676 hartrees

-----  
 / end of geometry optimization iteration 26 /  
 -----

end of program geopt

start of program onee

smallest eigenvalue of S: 3.333E-04

number of canonical orbitals..... 368

end of program onee

start of program probe

end of program probe

start of program grid

number of gridpoints:

| atom     | H1  | C1  | C2  | C3  | C4  | C5  | C6  |
|----------|-----|-----|-----|-----|-----|-----|-----|
| C7       |     |     |     |     |     |     |     |
| grid # 1 | 72  | 87  | 89  | 90  | 89  | 88  | 84  |
| 81       |     |     |     |     |     |     |     |
| grid # 2 | 116 | 97  | 96  | 98  | 97  | 97  | 94  |
| 90       |     |     |     |     |     |     |     |
| grid # 3 | 217 | 182 | 184 | 194 | 183 | 184 | 189 |
| 177      |     |     |     |     |     |     |     |
| grid # 4 | 216 | 326 | 328 | 338 | 328 | 328 | 323 |
| 314      |     |     |     |     |     |     |     |

number of gridpoints:

| atom     | H3  | H4  | H6  | C16 | C8  | N2  | C9  |
|----------|-----|-----|-----|-----|-----|-----|-----|
| C10      |     |     |     |     |     |     |     |
| grid # 1 | 73  | 73  | 70  | 92  | 82  | 95  | 82  |
| 69       |     |     |     |     |     |     |     |
| grid # 2 | 118 | 118 | 112 | 100 | 90  | 105 | 92  |
| 78       |     |     |     |     |     |     |     |
| grid # 3 | 223 | 223 | 207 | 194 | 174 | 211 | 176 |
| 147      |     |     |     |     |     |     |     |
| grid # 4 | 224 | 223 | 207 | 342 | 311 | 387 | 293 |
| 275      |     |     |     |     |     |     |     |

number of gridpoints:

| atom     | O1  | C23 | C18 | C19 | C20 | C21 | C22 |
|----------|-----|-----|-----|-----|-----|-----|-----|
| H2       |     |     |     |     |     |     |     |
| grid # 1 | 111 | 74  | 89  | 88  | 88  | 89  | 89  |
| 71       |     |     |     |     |     |     |     |
| grid # 2 | 123 | 80  | 97  | 95  | 96  | 97  | 96  |
| 112      |     |     |     |     |     |     |     |
| grid # 3 | 257 | 149 | 183 | 183 | 182 | 184 | 183 |
| 212      |     |     |     |     |     |     |     |
| grid # 4 | 450 | 287 | 327 | 326 | 327 | 327 | 327 |
| 211      |     |     |     |     |     |     |     |

number of gridpoints:

| atom     | H5  | H7  | H8  | H9  | H10 | H19 | H20 |
|----------|-----|-----|-----|-----|-----|-----|-----|
| H21      |     |     |     |     |     |     |     |
| grid # 1 | 71  | 73  | 73  | 73  | 67  | 71  | 71  |
| 70       |     |     |     |     |     |     |     |
| grid # 2 | 111 | 118 | 118 | 118 | 106 | 108 | 110 |
| 108      |     |     |     |     |     |     |     |
| grid # 3 | 212 | 223 | 223 | 224 | 202 | 218 | 216 |
| 217      |     |     |     |     |     |     |     |
| grid # 4 | 207 | 223 | 224 | 224 | 197 | 213 | 216 |
| 215      |     |     |     |     |     |     |     |

number of gridpoints:

| atom | H22 | H11 | H12 | H13 | total |
|------|-----|-----|-----|-----|-------|
|------|-----|-----|-----|-----|-------|

```

grid # 1      69      71      70      71      2865
grid # 2     110     109     107     111     3728
grid # 3     214     214     212     217     7190
grid # 4     211     211     209     218     9913

```

end of program grid

```

start of program rwr
end of program rwr

```

start of program scf

|      | i | u | d | i | g |                  | RMS      | maximum |
|------|---|---|---|---|---|------------------|----------|---------|
|      | t | p | i | c | r |                  | energy   | DIIS    |
|      | e | d | i | u | i | total energy     | density  | error   |
|      | r | t | s | t | d | change           | change   |         |
| etot | 1 | N | N | 1 | U | -783.03319876939 | 2.3E-05  | 5.8E-04 |
| etot | 2 | Y | Y | 4 | M | -783.03323974059 | 4.1E-05  | 2.3E-04 |
| etot | 3 | Y | Y | 4 | M | -783.03324620964 | 6.5E-06  | 6.5E-05 |
| etot | 4 | Y | N | 4 | M | -783.03324605340 | -1.6E-07 | 0.0E+00 |

Energy components, in hartrees:

|     |                               |                   |       |
|-----|-------------------------------|-------------------|-------|
| (A) | Nuclear repulsion.....        | 1414.90921567646  |       |
| (E) | Total one-electron terms..... | -3874.38940440734 |       |
| (I) | Total two-electron terms..... | 1676.44694267749  |       |
| (L) | Electronic energy.....        | -2197.94246172986 | (E+I) |
| (N) | Total energy.....             | -783.03324605340  | (A+L) |

SCFE: SCF energy: HF -783.03324605340 hartrees iterations:  
4

HOMO energy: -0.30202  
LUMO energy: 0.12924

Orbital energies:

|           |           |           |           |           |           |
|-----------|-----------|-----------|-----------|-----------|-----------|
| -20.52693 | -15.60025 | -11.34604 | -11.28583 | -11.25654 | -11.24990 |
| -11.24307 | -11.24142 | -11.24051 | -11.23864 | -11.23787 | -11.23485 |
| -11.23145 | -11.23061 | -11.23009 | -11.22979 | -11.22866 | -11.22763 |
| -11.20921 | -1.39734  | -1.26949  | -1.16507  | -1.14896  | -1.10601  |
| -1.03003  | -1.01864  | -1.01787  | -1.01268  | -0.96258  | -0.93267  |
| -0.85809  | -0.83887  | -0.83328  | -0.82168  | -0.79606  | -0.74108  |
| -0.71098  | -0.69499  | -0.67285  | -0.66427  | -0.64456  | -0.63761  |
| -0.62742  | -0.61487  | -0.61225  | -0.60856  | -0.59703  | -0.58332  |
| -0.57631  | -0.55333  | -0.54869  | -0.54062  | -0.53102  | -0.51896  |
| -0.51491  | -0.50720  | -0.50099  | -0.49777  | -0.48459  | -0.46861  |
| -0.46288  | -0.42152  | -0.41152  | -0.34259  | -0.33293  | -0.32291  |
| -0.30202  | 0.12924   | 0.13403   | 0.14449   | 0.15237   | 0.20394   |

0.22970 0.24103 0.24873 0.26129 0.28798

end of program scf

start of program der1a  
end of program der1a

start of program rwr  
end of program rwr

start of program der1b

forces (hartrees/bohr) : total

| atom | label | x             | y             | z             |
|------|-------|---------------|---------------|---------------|
| 1    | H1    | -1.792178E-05 | 2.698075E-05  | 9.931760E-06  |
| 2    | C1    | -4.199006E-05 | 2.670115E-05  | -6.619590E-05 |
| 3    | C2    | -8.823182E-05 | 1.499805E-04  | 5.690472E-05  |
| 4    | C3    | 1.579278E-05  | -6.367312E-05 | -7.640469E-05 |
| 5    | C4    | -1.255170E-05 | 1.367502E-04  | 6.529504E-05  |
| 6    | C5    | -4.801133E-05 | 9.386148E-05  | -6.154220E-05 |
| 7    | C6    | 2.006852E-04  | -1.277318E-04 | 7.927641E-05  |
| 8    | C7    | -1.934084E-04 | 4.005420E-05  | -6.789881E-05 |
| 9    | H3    | -1.721716E-05 | 1.468154E-05  | 1.066046E-05  |
| 10   | H4    | -1.824596E-05 | 9.375496E-06  | -1.374919E-05 |
| 11   | H6    | -4.016218E-05 | 5.683665E-05  | -3.846933E-05 |
| 12   | C16   | -6.178309E-05 | -1.417935E-04 | -6.482654E-05 |
| 13   | C8    | 1.979363E-04  | 7.852375E-05  | 4.670826E-05  |
| 14   | N2    | -2.080181E-04 | -1.484989E-04 | -8.149019E-04 |
| 15   | C9    | -1.070313E-04 | 1.479891E-04  | 4.834012E-04  |
| 16   | C10   | -1.226518E-05 | -3.260580E-05 | 6.293867E-05  |
| 17   | O1    | 4.586248E-05  | 2.250521E-04  | -9.902369E-05 |
| 18   | C23   | 9.323347E-05  | -1.697030E-04 | 6.568540E-05  |
| 19   | C18   | -1.058083E-04 | 7.957653E-06  | -6.525818E-05 |
| 20   | C19   | 9.945809E-05  | -7.383997E-06 | -9.282804E-05 |
| 21   | C20   | 1.053703E-04  | -7.017946E-05 | -9.893442E-05 |
| 22   | C21   | -5.107794E-05 | 7.666092E-05  | -1.227864E-05 |
| 23   | C22   | -1.118093E-04 | 7.346956E-05  | 6.439589E-05  |
| 24   | H2    | 6.428220E-05  | 5.038711E-05  | 6.818552E-05  |
| 25   | H5    | -3.915196E-05 | 1.808051E-04  | 1.147863E-04  |
| 26   | H7    | -3.490964E-05 | 3.468745E-05  | -1.847892E-06 |
| 27   | H8    | -2.301831E-05 | 1.793970E-05  | 1.105163E-05  |
| 28   | H9    | -5.992197E-05 | 3.180286E-05  | -2.453409E-06 |
| 29   | H10   | 2.853175E-05  | 4.350199E-05  | 3.840084E-05  |
| 30   | H19   | -3.297343E-04 | 1.963730E-04  | 3.111567E-05  |
| 31   | H20   | -7.354949E-05 | -2.253680E-05 | 3.250965E-05  |
| 32   | H21   | 1.115962E-04  | 1.245728E-04  | -2.175801E-04 |
| 33   | H22   | 4.246882E-05  | -3.002054E-05 | -1.482063E-05 |



|       |       |               |               |               |
|-------|-------|---------------|---------------|---------------|
| 34    | H11   | -1.123591E-04 | 8.593346E-05  | 6.140635E-05  |
| 35    | H12   | -5.157430E-05 | -7.412981E-05 | 6.178159E-05  |
| 36    | H13   | 1.116070E-04  | 1.554233E-05  | 1.800480E-04  |
| ----- |       |               |               |               |
|       | total | -7.429282E-04 | 1.058164E-03  | -2.645302E-04 |

end of program derlb

start of program geopt 27

geometry optimization step 27

reading input hessian of dimension 108

in five columns format

reading input hessian of dimension 108

in five columns format

Level shifts adjusted to satisfy step-size constraints

Step size: 0.0102619

Cos(theta): 0.6344988

Final level shift: -3.5962325E-02

energy change: -3.0792E-06 \* ( 5.0000E-05 )

gradient maximum: 8.2073E-04 . ( 4.5000E-04 )

gradient rms: 1.5112E-04 \* ( 3.0000E-04 )

step size: 0.01026 trust radius: 0.01000

displacement maximum: 4.2285E-03 . ( 1.8000E-03 )

displacement rms: 9.2907E-04 \* ( 1.2000E-03 )

predicted energy change: -7.3276E-06 geom step: 1.0262E-

02 full step: 1.0262E-02

molecular structure not yet converged...

center of mass moved by:

x: 1.0470E-03 y: 1.2433E-04 z: -4.8036E-04

new geometry:

|      | angstroms     |               |               |
|------|---------------|---------------|---------------|
| atom | x             | y             | z             |
| H1   | -1.1794720243 | 1.8871569488  | -2.2321788095 |
| C1   | -1.0972890597 | 2.1201593223  | -1.1841642894 |
| C2   | -0.8821948365 | 2.6957221129  | 1.5033551746  |
| C3   | -0.8785521726 | 1.0863737601  | -0.2888271952 |
| C4   | -1.2019040261 | 3.4348576098  | -0.7607198357 |
| C5   | -1.0947227599 | 3.7145428017  | 0.5891824574  |
| C6   | -0.7670616047 | 1.3774891464  | 1.0728390581  |
| C7   | -0.7870699621 | -0.3532015709 | -0.7559934079 |
| H3   | -1.3672413785 | 4.2232026877  | -1.4727419145 |
| H4   | -1.1804041545 | 4.7270911767  | 0.9422470827  |
| H6   | -0.8134670244 | 2.9346878000  | 2.5466863749  |
| C16  | 0.6125854325  | -0.7649482464 | -1.2108724078 |

|     |               |               |               |
|-----|---------------|---------------|---------------|
| C8  | -1.3968720220 | -1.2508271909 | 0.3434884075  |
| N2  | -0.5109487517 | 0.3379567172  | 1.9938959639  |
| C9  | -0.7808597944 | -0.9773199102 | 1.7055047391  |
| C10 | 0.0017912188  | 0.6548980036  | 3.3194622764  |
| O1  | -0.5778772296 | -1.8515145469 | 2.5000402312  |
| C23 | -1.3867054964 | -2.7425504517 | 0.0244735751  |
| C18 | 3.1400102171  | -1.5826522821 | -2.0962098764 |
| C19 | 0.7602748837  | -1.4841259595 | -2.3917962659 |
| C20 | 1.7590355243  | -0.4513129558 | -0.4850209520 |
| C21 | 3.0083076079  | -0.8592562788 | -0.9209425995 |
| C22 | 2.0099080046  | -1.8915889012 | -2.8329894489 |
| H2  | -0.1102272433 | -1.7310312277 | -2.9751269232 |
| H5  | 1.6832891008  | 0.1213768310  | 0.4207957459  |
| H7  | 3.8801859460  | -0.6079136199 | -0.3425947003 |
| H8  | 2.0970003175  | -2.4471452223 | -3.7503190464 |
| H9  | 4.1119248414  | -1.8965030187 | -2.4341384458 |
| H10 | -1.4338253536 | -0.4542944809 | -1.6210529454 |
| H19 | -0.3772496834 | -3.1282609528 | -0.0248868416 |
| H20 | -1.8702424424 | -2.9212139352 | -0.9313669075 |
| H21 | -1.9168614624 | -3.2944639093 | 0.7881952227  |
| H22 | -2.4339244095 | -0.9274179933 | 0.4420104673  |
| H11 | 0.8079845370  | 1.3736044673  | 3.2378540602  |
| H12 | 0.3703125208  | -0.2536724748 | 3.7634617095  |
| H13 | -0.7733320429 | 1.0652918938  | 3.9595084252  |

nuclear repulsion energy..... 1414.896885768 hartrees

-----  
 / end of geometry optimization iteration 27 /  
 -----

end of program geopt

start of program onee  
 smallest eigenvalue of S: 3.335E-04  
 number of canonical orbitals..... 368  
 end of program onee

start of program probe  
 end of program probe

start of program grid

number of gridpoints:

| atom     | H1  | C1 | C2 | C3 | C4 | C5 | C6 |
|----------|-----|----|----|----|----|----|----|
| C7       |     |    |    |    |    |    |    |
| grid # 1 | 72  | 87 | 89 | 89 | 89 | 88 | 83 |
| 81       |     |    |    |    |    |    |    |
| grid # 2 | 116 | 97 | 96 | 98 | 97 | 97 | 95 |
| 90       |     |    |    |    |    |    |    |

|          |     |     |     |     |     |     |     |
|----------|-----|-----|-----|-----|-----|-----|-----|
| grid # 3 | 217 | 182 | 184 | 194 | 183 | 184 | 189 |
| 177      |     |     |     |     |     |     |     |
| grid # 4 | 216 | 326 | 328 | 338 | 328 | 328 | 325 |
| 314      |     |     |     |     |     |     |     |

number of gridpoints:

|          |     |     |     |     |     |     |     |
|----------|-----|-----|-----|-----|-----|-----|-----|
| atom     | H3  | H4  | H6  | C16 | C8  | N2  | C9  |
| C10      |     |     |     |     |     |     |     |
| grid # 1 | 73  | 73  | 70  | 92  | 82  | 95  | 82  |
| 69       |     |     |     |     |     |     |     |
| grid # 2 | 118 | 118 | 112 | 100 | 90  | 105 | 92  |
| 80       |     |     |     |     |     |     |     |
| grid # 3 | 223 | 223 | 207 | 194 | 174 | 211 | 176 |
| 144      |     |     |     |     |     |     |     |
| grid # 4 | 224 | 223 | 207 | 342 | 311 | 387 | 293 |
| 272      |     |     |     |     |     |     |     |

number of gridpoints:

|          |     |     |     |     |     |     |     |
|----------|-----|-----|-----|-----|-----|-----|-----|
| atom     | O1  | C23 | C18 | C19 | C20 | C21 | C22 |
| H2       |     |     |     |     |     |     |     |
| grid # 1 | 111 | 73  | 89  | 88  | 88  | 89  | 89  |
| 71       |     |     |     |     |     |     |     |
| grid # 2 | 123 | 81  | 97  | 95  | 96  | 97  | 96  |
| 112      |     |     |     |     |     |     |     |
| grid # 3 | 256 | 145 | 183 | 183 | 182 | 184 | 183 |
| 212      |     |     |     |     |     |     |     |
| grid # 4 | 450 | 286 | 327 | 326 | 327 | 327 | 327 |
| 211      |     |     |     |     |     |     |     |

number of gridpoints:

|          |     |     |     |     |     |     |     |
|----------|-----|-----|-----|-----|-----|-----|-----|
| atom     | H5  | H7  | H8  | H9  | H10 | H19 | H20 |
| H21      |     |     |     |     |     |     |     |
| grid # 1 | 71  | 73  | 73  | 73  | 66  | 71  | 71  |
| 70       |     |     |     |     |     |     |     |
| grid # 2 | 111 | 118 | 118 | 118 | 106 | 108 | 110 |
| 108      |     |     |     |     |     |     |     |
| grid # 3 | 212 | 223 | 223 | 224 | 203 | 218 | 217 |
| 217      |     |     |     |     |     |     |     |
| grid # 4 | 207 | 223 | 224 | 224 | 196 | 212 | 216 |
| 215      |     |     |     |     |     |     |     |

number of gridpoints:

|          |     |     |     |     |       |
|----------|-----|-----|-----|-----|-------|
| atom     | H22 | H11 | H12 | H13 | total |
| grid # 1 | 69  | 71  | 70  | 71  | 2861  |
| grid # 2 | 110 | 109 | 107 | 111 | 3732  |
| grid # 3 | 214 | 214 | 213 | 217 | 7185  |
| grid # 4 | 211 | 211 | 209 | 218 | 9909  |

end of program grid

start of program rwr

end of program rwr

start of program scf

|      | i | u | d | i | g |                  | RMS      | maximum |
|------|---|---|---|---|---|------------------|----------|---------|
|      | t | p | i | c | r |                  | energy   | DIIS    |
|      | e | d | i | u | i | total energy     | density  | error   |
|      | r | t | s | t | d | change           | change   |         |
| etot | 1 | N | N | 1 | U | -783.03318666421 | 2.5E-05  | 8.9E-04 |
| etot | 2 | Y | Y | 4 | M | -783.03324219424 | 5.6E-05  | 3.5E-04 |
| etot | 3 | Y | Y | 4 | M | -783.03324698572 | 4.8E-06  | 9.4E-05 |
| etot | 4 | Y | N | 4 | M | -783.03324679073 | -1.9E-07 | 0.0E+00 |

Energy components, in hartrees:

|     |                               |                   |       |
|-----|-------------------------------|-------------------|-------|
| (A) | Nuclear repulsion.....        | 1414.89688576840  |       |
| (E) | Total one-electron terms..... | -3874.35979172694 |       |
| (I) | Total two-electron terms..... | 1676.42965916780  |       |
| (L) | Electronic energy.....        | -2197.93013255913 | (E+I) |
| (N) | Total energy.....             | -783.03324679073  | (A+L) |

SCFE: SCF energy: HF -783.03324679073 hartrees iterations:  
4

HOMO energy: -0.30203  
LUMO energy: 0.12926

Orbital energies:

|           |           |           |           |           |           |
|-----------|-----------|-----------|-----------|-----------|-----------|
| -20.52671 | -15.60056 | -11.34609 | -11.28618 | -11.25663 | -11.25003 |
| -11.24304 | -11.24166 | -11.24054 | -11.23856 | -11.23793 | -11.23495 |
| -11.23119 | -11.23054 | -11.22999 | -11.22952 | -11.22850 | -11.22778 |
| -11.20895 | -1.39751  | -1.26973  | -1.16513  | -1.14898  | -1.10606  |
| -1.03011  | -1.01866  | -1.01790  | -1.01272  | -0.96259  | -0.93279  |
| -0.85825  | -0.83905  | -0.83332  | -0.82169  | -0.79612  | -0.74122  |
| -0.71103  | -0.69500  | -0.67290  | -0.66432  | -0.64464  | -0.63756  |
| -0.62744  | -0.61489  | -0.61226  | -0.60857  | -0.59695  | -0.58334  |
| -0.57634  | -0.55334  | -0.54885  | -0.54071  | -0.53105  | -0.51906  |
| -0.51486  | -0.50724  | -0.50107  | -0.49777  | -0.48458  | -0.46870  |
| -0.46286  | -0.42170  | -0.41157  | -0.34262  | -0.33294  | -0.32290  |
| -0.30203  | 0.12926   | 0.13404   | 0.14449   | 0.15229   | 0.20392   |
| 0.22978   | 0.24103   | 0.24891   | 0.26127   | 0.28813   |           |

end of program scf

start of program derla  
end of program derla

start of program rwr  
end of program rwr

start of program der1b

forces (hartrees/bohr) : total

| atom  | label | x             | y             | z             |
|-------|-------|---------------|---------------|---------------|
| 1     | H1    | -2.090848E-05 | 4.081619E-05  | -4.434719E-05 |
| 2     | C1    | -8.989497E-06 | 4.357245E-05  | 5.401417E-05  |
| 3     | C2    | -5.143640E-05 | -1.093332E-04 | -6.448534E-05 |
| 4     | C3    | 1.847298E-06  | 1.145373E-04  | 1.040952E-04  |
| 5     | C4    | -2.015133E-05 | -8.740820E-05 | -8.751947E-05 |
| 6     | C5    | 9.266937E-06  | -2.638054E-05 | 4.224999E-05  |
| 7     | C6    | -1.366397E-04 | 2.251690E-04  | -2.121963E-04 |
| 8     | C7    | 1.189142E-04  | 4.867431E-05  | 4.540536E-05  |
| 9     | H3    | -2.657231E-05 | 6.823764E-05  | -4.882791E-05 |
| 10    | H4    | -2.296779E-05 | 6.895143E-05  | -8.812317E-06 |
| 11    | H6    | -1.258229E-05 | 1.241295E-05  | 2.908081E-05  |
| 12    | C16   | -3.674520E-05 | 2.678891E-04  | 1.310726E-04  |
| 13    | C8    | -1.375373E-04 | -3.900588E-05 | -9.435071E-05 |
| 14    | N2    | 9.403301E-05  | 1.452120E-04  | 8.008472E-04  |
| 15    | C9    | -3.450005E-05 | -4.602372E-05 | -4.751891E-04 |
| 16    | C10   | 1.649608E-05  | -8.706207E-05 | 3.087787E-05  |
| 17    | O1    | -8.637606E-05 | -5.641202E-05 | 1.305854E-04  |
| 18    | C23   | -1.445009E-04 | 2.742175E-04  | -1.233591E-04 |
| 19    | C18   | 1.590060E-04  | 4.030787E-05  | 3.857896E-05  |
| 20    | C19   | -1.360583E-04 | 2.680931E-05  | 7.445288E-06  |
| 21    | C20   | -1.194817E-04 | 1.964006E-04  | 1.927457E-04  |
| 22    | C21   | 3.052576E-05  | 4.049398E-05  | 9.407518E-05  |
| 23    | C22   | 2.349070E-06  | -3.341260E-05 | -1.113862E-04 |
| 24    | H2    | -1.580351E-04 | -8.381589E-06 | -1.438517E-04 |
| 25    | H5    | 5.462735E-06  | -1.678341E-04 | -1.434524E-04 |
| 26    | H7    | 3.340883E-06  | 1.092779E-05  | 5.767035E-06  |
| 27    | H8    | -1.946931E-05 | -5.369301E-06 | -1.201840E-04 |
| 28    | H9    | 2.354580E-05  | 1.237455E-05  | -2.718097E-05 |
| 29    | H10   | -8.440204E-05 | 5.228979E-06  | -6.750030E-05 |
| 30    | H19   | 3.304385E-04  | -1.669095E-04 | -2.966068E-05 |
| 31    | H20   | 1.328988E-05  | 8.538985E-05  | -7.738057E-05 |
| 32    | H21   | -1.835455E-04 | -1.009555E-04 | 2.293352E-04  |
| 33    | H22   | -1.291988E-04 | 7.378964E-05  | 9.136342E-06  |
| 34    | H11   | -1.821911E-05 | 2.933369E-05  | -6.064266E-05 |
| 35    | H12   | 5.778679E-05  | 1.833578E-04  | -7.720539E-05 |
| 36    | H13   | -3.584516E-05 | -1.437868E-05 | -2.293819E-04 |
| total |       | -7.578594E-04 | 1.065237E-03  | -3.016019E-04 |

end of program der1b

start of program geopt 28

geometry optimization step 28

reading input hessian of dimension 108  
in five columns format  
reading input hessian of dimension 108  
in five columns format

Level shifts adjusted to satisfy step-size constraints

Step size: 0.0101973  
Cos(theta): 0.7537542

Final level shift: -6.9111039E-02

energy change: -7.3734E-07 # ( 5.0000E-05 )  
gradient maximum: 5.2607E-04 . ( 4.5000E-04 )  
gradient rms: 1.5503E-04 \* ( 3.0000E-04 )  
step size: 0.01020 trust radius: 0.01000  
displacement maximum: 4.1528E-03 . ( 1.8000E-03 )  
displacement rms: 9.2322E-04 \* ( 1.2000E-03 )  
predicted energy change: -1.0174E-05 geom step: 1.0197E-  
02 full step: 1.0197E-02  
molecular structure not yet converged...

center of mass moved by:

x: -9.6132E-04 y: 7.3494E-05 z: 4.2561E-04

new geometry:

|      | angstroms     |               |               |
|------|---------------|---------------|---------------|
| atom | x             | y             | z             |
| H1   | -1.1803715093 | 1.8862877194  | -2.2324771278 |
| C1   | -1.0985303416 | 2.1196351010  | -1.1844611373 |
| C2   | -0.8838817211 | 2.6957482142  | 1.5028513354  |
| C3   | -0.8794531353 | 1.0863604536  | -0.2886923671 |
| C4   | -1.2037681891 | 3.4342116441  | -0.7615119703 |
| C5   | -1.0967006381 | 3.7142365264  | 0.5884150832  |
| C6   | -0.7683622701 | 1.3776901146  | 1.0727258012  |
| C7   | -0.7870035225 | -0.3530466722 | -0.7559180889 |
| H3   | -1.3693523761 | 4.2223805246  | -1.4737992268 |
| H4   | -1.1827758026 | 4.7269341414  | 0.9411067211  |
| H6   | -0.8150175337 | 2.9346929253  | 2.5462543717  |
| C16  | 0.6127588524  | -0.7640467225 | -1.2106833025 |
| C8   | -1.3972405500 | -1.2509129913 | 0.3431601902  |
| N2   | -0.5106132583 | 0.3384239096  | 1.9944478262  |
| C9   | -0.7809295348 | -0.9770557626 | 1.7051378013  |
| C10  | 0.0071783429  | 0.6572169777  | 3.3167850463  |
| O1   | -0.5786036552 | -1.8510309033 | 2.5001725757  |
| C23  | -1.3852046176 | -2.7427410246 | 0.0247723685  |
| C18  | 3.1404609695  | -1.5837747157 | -2.0948055187 |
| C19  | 0.7609331817  | -1.4789741050 | -2.3945435036 |
| C20  | 1.7585428783  | -0.4566955416 | -0.4809682830 |

|     |               |               |               |
|-----|---------------|---------------|---------------|
| C21 | 3.0079416483  | -0.8655994230 | -0.9162914807 |
| C22 | 2.0108545244  | -1.8870764343 | -2.8352920419 |
| H2  | -0.1092190569 | -1.7221972031 | -2.9807795296 |
| H5  | 1.6823121655  | 0.1097058269  | 0.4281009265  |
| H7  | 3.8792010646  | -0.6190909500 | -0.3349808891 |
| H8  | 2.0984099613  | -2.4387891203 | -3.7551383275 |
| H9  | 4.1123811988  | -1.8982677948 | -2.4323259928 |
| H10 | -1.4337590168 | -0.4544798159 | -1.6211872382 |
| H19 | -0.3749109308 | -3.1292634445 | -0.0201343286 |
| H20 | -1.8638739371 | -2.9210371349 | -0.9336206240 |
| H21 | -1.9192549809 | -3.2946083017 | 0.7867341161  |
| H22 | -2.4346069675 | -0.9278921550 | 0.4413733792  |
| H11 | 0.8120954398  | 1.3769625698  | 3.2302258113  |
| H12 | 0.3798025486  | -0.2495079542 | 3.7603695116  |
| H13 | -0.7668205736 | 1.0673975340  | 3.9579282214  |

nuclear repulsion energy..... 1414.900958421 hartrees

-----  
/ end of geometry optimization iteration 28 /  
-----

end of program geopt

start of program onee  
smallest eigenvalue of S: 3.333E-04  
number of canonical orbitals..... 368  
end of program onee

start of program probe  
end of program probe

start of program grid

number of gridpoints:

| atom     | H1  | C1  | C2  | C3  | C4  | C5  | C6  |
|----------|-----|-----|-----|-----|-----|-----|-----|
| C7       |     |     |     |     |     |     |     |
| grid # 1 | 72  | 87  | 89  | 90  | 89  | 88  | 84  |
| 81       |     |     |     |     |     |     |     |
| grid # 2 | 116 | 97  | 96  | 98  | 97  | 97  | 94  |
| 90       |     |     |     |     |     |     |     |
| grid # 3 | 217 | 182 | 184 | 194 | 183 | 184 | 189 |
| 177      |     |     |     |     |     |     |     |
| grid # 4 | 216 | 326 | 328 | 338 | 328 | 328 | 323 |
| 314      |     |     |     |     |     |     |     |

number of gridpoints:

| atom | H3 | H4 | H6 | C16 | C8 | N2 | C9 |
|------|----|----|----|-----|----|----|----|
| C10  |    |    |    |     |    |    |    |

|     |          |     |     |     |     |     |     |     |
|-----|----------|-----|-----|-----|-----|-----|-----|-----|
| 69  | grid # 1 | 73  | 73  | 70  | 92  | 82  | 95  | 82  |
| 78  | grid # 2 | 118 | 118 | 112 | 100 | 90  | 105 | 92  |
| 147 | grid # 3 | 223 | 223 | 207 | 194 | 174 | 211 | 176 |
| 275 | grid # 4 | 224 | 223 | 207 | 342 | 311 | 387 | 293 |

number of gridpoints:

|     |          |     |     |     |     |     |     |     |
|-----|----------|-----|-----|-----|-----|-----|-----|-----|
| H2  | atom     | O1  | C23 | C18 | C19 | C20 | C21 | C22 |
| 71  | grid # 1 | 111 | 74  | 89  | 88  | 88  | 89  | 89  |
| 112 | grid # 2 | 123 | 80  | 97  | 95  | 96  | 97  | 96  |
| 212 | grid # 3 | 257 | 149 | 183 | 183 | 182 | 184 | 183 |
| 211 | grid # 4 | 450 | 286 | 327 | 326 | 327 | 327 | 327 |

number of gridpoints:

|     |          |     |     |     |     |     |     |     |
|-----|----------|-----|-----|-----|-----|-----|-----|-----|
| H21 | atom     | H5  | H7  | H8  | H9  | H10 | H19 | H20 |
| 70  | grid # 1 | 71  | 73  | 73  | 73  | 67  | 71  | 71  |
| 108 | grid # 2 | 111 | 118 | 118 | 118 | 106 | 108 | 110 |
| 217 | grid # 3 | 212 | 223 | 223 | 224 | 202 | 218 | 216 |
| 215 | grid # 4 | 207 | 223 | 224 | 224 | 197 | 212 | 216 |

number of gridpoints:

|  |          |     |     |     |     |       |
|--|----------|-----|-----|-----|-----|-------|
|  | atom     | H22 | H11 | H12 | H13 | total |
|  | grid # 1 | 69  | 71  | 70  | 71  | 2865  |
|  | grid # 2 | 110 | 109 | 107 | 111 | 3728  |
|  | grid # 3 | 214 | 214 | 212 | 217 | 7190  |
|  | grid # 4 | 211 | 211 | 209 | 218 | 9911  |

end of program grid

start of program rwr  
end of program rwr

start of program scf

|   |   |   |   |   |        |                             |
|---|---|---|---|---|--------|-----------------------------|
| i | u | d | i | g |        |                             |
| t | p | i | c | r |        |                             |
| e | d | i | u | i | energy | RMS maximum<br>density DIIS |



|      | r | t | s | t | d | total energy     | change   | change  | error   |
|------|---|---|---|---|---|------------------|----------|---------|---------|
| etot | 1 | N | N | 1 | U | -783.03319039242 |          | 2.0E-05 | 9.4E-04 |
| etot | 2 | Y | Y | 4 | M | -783.03325183750 | 6.1E-05  | 9.0E-06 | 3.7E-04 |
| etot | 3 | Y | Y | 4 | M | -783.03326266595 | 1.1E-05  | 2.9E-06 | 9.8E-05 |
| etot | 4 | Y | N | 4 | M | -783.03326209570 | -5.7E-07 | 0.0E+00 | 0.0E+00 |

Energy components, in hartrees:

|     |                               |                   |       |
|-----|-------------------------------|-------------------|-------|
| (A) | Nuclear repulsion.....        | 1414.90095842069  |       |
| (E) | Total one-electron terms..... | -3874.37436872279 |       |
| (I) | Total two-electron terms..... | 1676.44014820640  |       |
| (L) | Electronic energy.....        | -2197.93422051639 | (E+I) |
| (N) | Total energy.....             | -783.03326209570  | (A+L) |

SCFE: SCF energy: HF -783.03326209570 hartrees iterations:  
4

HOMO energy: -0.30201  
LUMO energy: 0.12926

Orbital energies:

|           |           |           |           |           |           |
|-----------|-----------|-----------|-----------|-----------|-----------|
| -20.52693 | -15.60020 | -11.34596 | -11.28579 | -11.25655 | -11.24984 |
| -11.24303 | -11.24137 | -11.24049 | -11.23866 | -11.23787 | -11.23487 |
| -11.23146 | -11.23060 | -11.23011 | -11.22980 | -11.22867 | -11.22760 |
| -11.20922 | -1.39740  | -1.26947  | -1.16503  | -1.14894  | -1.10599  |
| -1.03002  | -1.01863  | -1.01783  | -1.01268  | -0.96257  | -0.93266  |
| -0.85809  | -0.83888  | -0.83326  | -0.82166  | -0.79605  | -0.74108  |
| -0.71097  | -0.69498  | -0.67284  | -0.66427  | -0.64456  | -0.63757  |
| -0.62742  | -0.61486  | -0.61225  | -0.60853  | -0.59700  | -0.58332  |
| -0.57628  | -0.55333  | -0.54870  | -0.54064  | -0.53102  | -0.51898  |
| -0.51490  | -0.50719  | -0.50097  | -0.49775  | -0.48458  | -0.46861  |
| -0.46286  | -0.42152  | -0.41152  | -0.34256  | -0.33293  | -0.32287  |
| -0.30201  | 0.12926   | 0.13403   | 0.14450   | 0.15238   | 0.20393   |
| 0.22970   | 0.24104   | 0.24874   | 0.26135   | 0.28818   |           |

end of program scf

start of program derla  
end of program derla

start of program rwr  
end of program rwr

start of program derlb

forces (hartrees/bohr) : total

| atom  | label | x             | y             | z             |
|-------|-------|---------------|---------------|---------------|
| 1     | H1    | -1.555058E-05 | 2.235707E-05  | 2.128014E-05  |
| 2     | C1    | -3.883467E-05 | 5.426406E-05  | -7.943889E-05 |
| 3     | C2    | -8.008048E-05 | 1.607169E-04  | 4.014778E-05  |
| 4     | C3    | 4.816982E-07  | -4.391354E-05 | -1.421456E-04 |
| 5     | C4    | -1.725269E-05 | 1.229808E-04  | 5.752323E-05  |
| 6     | C5    | -3.922899E-05 | 8.383047E-05  | -4.310034E-05 |
| 7     | C6    | 1.624181E-04  | -7.797360E-05 | 1.143179E-04  |
| 8     | C7    | -1.561167E-04 | 2.660171E-06  | -8.892253E-05 |
| 9     | H3    | -7.793564E-06 | -8.158132E-06 | 3.157353E-05  |
| 10    | H4    | -1.154392E-05 | -1.359147E-05 | -1.254950E-05 |
| 11    | H6    | -3.474480E-05 | 4.945667E-05  | -4.642687E-05 |
| 12    | C16   | -6.624352E-05 | -1.887955E-04 | -7.234874E-05 |
| 13    | C8    | 2.028370E-04  | 6.663933E-05  | 5.167696E-05  |
| 14    | N2    | -1.674183E-04 | 7.750970E-05  | -6.419616E-04 |
| 15    | C9    | -1.084077E-04 | 1.281298E-04  | 3.696466E-04  |
| 16    | C10   | 6.555533E-06  | 4.686658E-05  | 6.690168E-06  |
| 17    | O1    | 3.102297E-05  | 2.302475E-05  | -1.190399E-05 |
| 18    | C23   | 5.140563E-05  | -7.752578E-05 | 3.013557E-05  |
| 19    | C18   | -1.272726E-04 | 2.587652E-05  | -6.504276E-05 |
| 20    | C19   | 2.695637E-05  | 3.247964E-05  | -4.844918E-05 |
| 21    | C20   | 2.368255E-05  | -1.534732E-04 | -2.145792E-04 |
| 22    | C21   | -7.976129E-05 | 2.631499E-05  | -1.101896E-04 |
| 23    | C22   | -4.969126E-05 | 5.482464E-05  | 6.399814E-05  |
| 24    | H2    | 1.155120E-04  | 8.271584E-05  | 1.210675E-04  |
| 25    | H5    | -3.352982E-05 | 2.408379E-04  | 1.489408E-04  |
| 26    | H7    | 7.638167E-06  | 5.572164E-05  | 6.592154E-06  |
| 27    | H8    | -1.973847E-05 | 4.631456E-05  | 8.901697E-05  |
| 28    | H9    | -4.629427E-05 | 4.658814E-05  | 6.399982E-06  |
| 29    | H10   | 3.653094E-05  | 5.443721E-05  | 3.054239E-05  |
| 30    | H19   | -2.151140E-04 | 1.525051E-04  | 1.978718E-05  |
| 31    | H20   | -6.676981E-05 | -5.047967E-06 | 1.707747E-05  |
| 32    | H21   | 7.557822E-05  | 8.945987E-05  | -1.679852E-04 |
| 33    | H22   | 1.265353E-06  | 6.778123E-06  | -7.898931E-06 |
| 34    | H11   | -1.377163E-04 | 3.926101E-05  | 3.184657E-05  |
| 35    | H12   | -3.607236E-05 | -1.112579E-04 | 6.496164E-05  |
| 36    | H13   | 8.648322E-05  | 6.846773E-06  | 1.326019E-04  |
| total |       | -7.268083E-04 | 1.119661E-03  | -2.971185E-04 |

end of program derlb

start of program geopt 29

geometry optimization step 29

reading input hessian of dimension 108

in five columns format

reading input hessian of dimension 108

in five columns format

Level shifts adjusted to satisfy step-size constraints

Step size: 0.0106921

Cos(theta): 0.6480668

Final level shift: -4.3295903E-02

energy change: -1.5305E-05 \* ( 5.0000E-05 )  
gradient maximum: 7.5522E-04 . ( 4.5000E-04 )  
gradient rms: 1.4572E-04 \* ( 3.0000E-04 )  
step size: 0.01069 trust radius: 0.01000  
displacement maximum: 5.8680E-03 . ( 1.8000E-03 )  
displacement rms: 9.6802E-04 \* ( 1.2000E-03 )  
predicted energy change: -8.0511E-06 geom step: 1.0692E-  
02 full step: 1.0692E-02  
molecular structure not yet converged...

center of mass moved by:

x: 6.2837E-04 y: -1.0934E-04 z: -2.7042E-04

new geometry:

|      | angstroms     |               |               |
|------|---------------|---------------|---------------|
| atom | x             | y             | z             |
| H1   | -1.1788733885 | 1.8878718807  | -2.2321586842 |
| C1   | -1.0969269115 | 2.1206372364  | -1.1840824746 |
| C2   | -0.8825613167 | 2.6955463734  | 1.5037118382  |
| C3   | -0.8783831535 | 1.0866648763  | -0.2889295994 |
| C4   | -1.2016150744 | 3.4351888220  | -0.7602818654 |
| C5   | -1.0948420529 | 3.7145587110  | 0.5897355743  |
| C6   | -0.7671428566 | 1.3775024297  | 1.0728528398  |
| C7   | -0.7869120089 | -0.3528705335 | -0.7562639684 |
| H3   | -1.3667034600 | 4.2237130208  | -1.4721255323 |
| H4   | -1.1806502159 | 4.7270038069  | 0.9430156885  |
| H6   | -0.8141699837 | 2.9341484341  | 2.5471452723  |
| C16  | 0.6127246537  | -0.7649451979 | -1.2107379449 |
| C8   | -1.3972490390 | -1.2504998139 | 0.3429472432  |
| N2   | -0.5108322576 | 0.3378002355  | 1.9937562274  |
| C9   | -0.7816101143 | -0.9774533446 | 1.7052295352  |
| C10  | 0.0032617333  | 0.6542556842  | 3.3187332041  |
| O1   | -0.5797565326 | -1.8519107826 | 2.4999079573  |
| C23  | -1.3870637865 | -2.7421323603 | 0.0235852330  |
| C18  | 3.1403833217  | -1.5828599247 | -2.0956337379 |
| C19  | 0.7604488217  | -1.4857920762 | -2.3905652742 |
| C20  | 1.7592324781  | -0.4497017897 | -0.4858780360 |
| C21  | 3.0086124301  | -0.8576395062 | -0.9216005653 |
| C22  | 2.0101670655  | -1.8935379538 | -2.8314359855 |
| H2   | -0.1100614100 | -1.7338114890 | -2.9732231543 |
| H5   | 1.6835999496  | 0.1246347759  | 0.4190201094  |
| H7   | 3.8806210858  | -0.6047262352 | -0.3440256644 |
| H8   | 2.0972348631  | -2.4505899926 | -3.7477444871 |
| H9   | 4.1123991701  | -1.8966879647 | -2.4333251864 |
| H10  | -1.4334139749 | -0.4537104506 | -1.6215544736 |

|     |               |               |               |
|-----|---------------|---------------|---------------|
| H19 | -0.3774696748 | -3.1281547414 | -0.0251899498 |
| H20 | -1.8698920370 | -2.9203376809 | -0.9327199536 |
| H21 | -1.9179220104 | -3.2942602638 | 0.7868296311  |
| H22 | -2.4343657864 | -0.9269015691 | 0.4412054956  |
| H11 | 0.8079407585  | 1.3743923393  | 3.2364059946  |
| H12 | 0.3742016284  | -0.2540835313 | 3.7613795805  |
| H13 | -0.7717628830 | 1.0625676536  | 3.9601168675  |

nuclear repulsion energy..... 1414.898785614 hartrees

-----  
 / end of geometry optimization iteration 29 /  
 -----

end of program geopt

start of program onee  
 smallest eigenvalue of S: 3.335E-04  
 number of canonical orbitals..... 368  
 end of program onee

start of program probe  
 end of program probe

start of program grid

number of gridpoints:

| atom     | H1  | C1  | C2  | C3  | C4  | C5  | C6  |
|----------|-----|-----|-----|-----|-----|-----|-----|
| C7       |     |     |     |     |     |     |     |
| grid # 1 | 72  | 87  | 89  | 89  | 89  | 88  | 83  |
| 81       |     |     |     |     |     |     |     |
| grid # 2 | 116 | 97  | 96  | 98  | 97  | 97  | 95  |
| 90       |     |     |     |     |     |     |     |
| grid # 3 | 217 | 182 | 184 | 194 | 183 | 184 | 189 |
| 177      |     |     |     |     |     |     |     |
| grid # 4 | 216 | 326 | 328 | 338 | 328 | 328 | 325 |
| 314      |     |     |     |     |     |     |     |

number of gridpoints:

| atom     | H3  | H4  | H6  | C16 | C8  | N2  | C9  |
|----------|-----|-----|-----|-----|-----|-----|-----|
| C10      |     |     |     |     |     |     |     |
| grid # 1 | 73  | 73  | 70  | 92  | 82  | 95  | 82  |
| 70       |     |     |     |     |     |     |     |
| grid # 2 | 118 | 118 | 112 | 100 | 90  | 105 | 92  |
| 80       |     |     |     |     |     |     |     |
| grid # 3 | 223 | 223 | 207 | 194 | 174 | 211 | 176 |
| 143      |     |     |     |     |     |     |     |
| grid # 4 | 224 | 223 | 207 | 342 | 311 | 387 | 293 |
| 272      |     |     |     |     |     |     |     |

```

number of gridpoints:
  atom      01      C23      C18      C19      C20      C21      C22
H2
  grid # 1      111      73      89      88      88      89      89
71
  grid # 2      123      80      97      95      96      97      96
112
  grid # 3      256      147      183      183      182      184      183
212
  grid # 4      450      285      327      326      327      327      327
211

```

```

number of gridpoints:
  atom      H5      H7      H8      H9      H10      H19      H20
H21
  grid # 1      71      73      73      73      66      71      71
70
  grid # 2      111      118      118      118      106      108      110
108
  grid # 3      212      223      223      224      203      218      217
217
  grid # 4      207      223      224      224      196      212      216
215

```

```

number of gridpoints:
  atom      H22      H11      H12      H13      total
grid # 1      69      71      70      71      2862
grid # 2      110      109      107      111      3731
grid # 3      214      214      213      217      7186
grid # 4      211      211      209      218      9908

```

end of program grid

start of program rwr  
end of program rwr

start of program scf

|      | i | u | d | i | g |                  | energy  | RMS     | maximum |
|------|---|---|---|---|---|------------------|---------|---------|---------|
|      | t | p | i | c | r |                  | change  | density | DIIS    |
|      | e | d | i | u | i | total energy     |         | change  | error   |
|      | r | t | s | t | d |                  |         |         |         |
| etot | 1 | N | N | 1 | U | -783.03315216126 |         | 2.3E-05 | 1.2E-03 |
| etot | 2 | Y | Y | 4 | M | -783.03324048549 | 8.8E-05 | 1.1E-05 | 4.9E-04 |
| etot | 3 | Y | Y | 4 | M | -783.03325036853 | 9.9E-06 | 3.4E-06 | 1.2E-04 |
| etot | 4 | Y | N | 4 | M | -783.03325250590 | 2.1E-06 | 0.0E+00 | 0.0E+00 |

Energy components, in hartrees:

(A) Nuclear repulsion..... 1414.89878561400  
 (E) Total one-electron terms..... -3874.36244561246  
 (I) Total two-electron terms..... 1676.43040749256  
 (L) Electronic energy..... -2197.93203811990 (E+I)  
 (N) Total energy..... -783.03325250590 (A+L)

SCFE: SCF energy: HF -783.03325250590 hartrees iterations:  
 4

HOMO energy: -0.30206  
 LUMO energy: 0.12927

Orbital energies:

|           |           |           |           |           |           |
|-----------|-----------|-----------|-----------|-----------|-----------|
| -20.52667 | -15.60060 | -11.34615 | -11.28622 | -11.25662 | -11.25007 |
| -11.24309 | -11.24172 | -11.24054 | -11.23854 | -11.23793 | -11.23494 |
| -11.23116 | -11.23053 | -11.22998 | -11.22950 | -11.22848 | -11.22781 |
| -11.20900 | -1.39743  | -1.26973  | -1.16516  | -1.14900  | -1.10608  |
| -1.03013  | -1.01868  | -1.01793  | -1.01271  | -0.96259  | -0.93280  |
| -0.85825  | -0.83904  | -0.83335  | -0.82171  | -0.79613  | -0.74122  |
| -0.71103  | -0.69501  | -0.67290  | -0.66434  | -0.64465  | -0.63757  |
| -0.62744  | -0.61490  | -0.61226  | -0.60860  | -0.59696  | -0.58332  |
| -0.57637  | -0.55339  | -0.54884  | -0.54071  | -0.53103  | -0.51906  |
| -0.51484  | -0.50724  | -0.50109  | -0.49778  | -0.48458  | -0.46870  |
| -0.46288  | -0.42169  | -0.41157  | -0.34264  | -0.33293  | -0.32294  |
| -0.30206  | 0.12927   | 0.13405   | 0.14446   | 0.15226   | 0.20389   |
| 0.22976   | 0.24100   | 0.24891   | 0.26128   | 0.28813   |           |

end of program scf

start of program derla  
 end of program derla

start of program rwr  
 end of program rwr

start of program der1b

forces (hartrees/bohr) : total

| atom | label | x             | y             | z             |
|------|-------|---------------|---------------|---------------|
| 1    | H1    | -2.291875E-05 | 4.619516E-05  | -5.526117E-05 |
| 2    | C1    | -6.479568E-06 | 6.184105E-06  | 7.165012E-05  |
| 3    | C2    | -4.165763E-05 | -1.158589E-04 | -5.670997E-05 |
| 4    | C3    | 1.783000E-05  | 9.688100E-05  | 1.558037E-04  |
| 5    | C4    | -2.068571E-05 | -6.135089E-05 | -7.741331E-05 |
| 6    | C5    | 1.916573E-06  | -1.235763E-05 | 2.501196E-05  |
| 7    | C6    | -1.036172E-04 | 1.575757E-04  | -2.246117E-04 |

|       |       |               |               |               |
|-------|-------|---------------|---------------|---------------|
| 8     | C7    | 8.084306E-05  | 7.878387E-05  | 6.507889E-05  |
| 9     | H3    | -3.608134E-05 | 8.944618E-05  | -6.485638E-05 |
| 10    | H4    | -2.957888E-05 | 8.858321E-05  | -7.074376E-06 |
| 11    | H6    | -1.648444E-05 | 2.255296E-05  | 4.057173E-05  |
| 12    | C16   | -2.331645E-05 | 3.153548E-04  | 1.221708E-04  |
| 13    | C8    | -1.561792E-04 | -1.890658E-05 | -7.369775E-05 |
| 14    | N2    | 4.857373E-05  | -9.977499E-05 | 5.748698E-04  |
| 15    | C9    | -2.490452E-05 | -7.974711E-06 | -3.380531E-04 |
| 16    | C10   | -1.102960E-05 | -1.691847E-04 | 7.056659E-05  |
| 17    | O1    | -6.380146E-05 | 1.387361E-04  | 2.029738E-05  |
| 18    | C23   | -9.872603E-05 | 1.616321E-04  | -8.066078E-05 |
| 19    | C18   | 1.735218E-04  | 2.690809E-05  | 3.523366E-05  |
| 20    | C19   | -4.715140E-05 | -2.108353E-05 | -2.587199E-05 |
| 21    | C20   | -3.829152E-05 | 2.837459E-04  | 3.182249E-04  |
| 22    | C21   | 6.012526E-05  | 9.623631E-05  | 1.959838E-04  |
| 23    | C22   | -7.883133E-05 | -2.672005E-06 | -9.565389E-05 |
| 24    | H2    | -2.094142E-04 | -3.414577E-05 | -2.029990E-04 |
| 25    | H5    | 5.249878E-06  | -2.252649E-04 | -1.966494E-04 |
| 26    | H7    | -3.735866E-05 | -8.355032E-06 | 8.551318E-07  |
| 27    | H8    | -2.544330E-05 | -3.346991E-05 | -1.985792E-04 |
| 28    | H9    | 1.322562E-05  | 2.225875E-06  | -3.526835E-05 |
| 29    | H10   | -8.571758E-05 | -1.738086E-06 | -6.171350E-05 |
| 30    | H19   | 1.923556E-04  | -1.050529E-04 | -2.424592E-05 |
| 31    | H20   | 7.966574E-06  | 6.361570E-05  | -5.888849E-05 |
| 32    | H21   | -1.399424E-04 | -6.214505E-05 | 1.656624E-04  |
| 33    | H22   | -6.928268E-05 | 3.972374E-05  | -1.163258E-06 |
| 34    | H11   | 3.711121E-05  | 8.676907E-05  | -3.379518E-05 |
| 35    | H12   | 2.414597E-05  | 2.112359E-04  | -8.316705E-05 |
| 36    | H13   | -3.403679E-05 | 1.505834E-05  | -1.490863E-04 |
| ----- |       | -----         | -----         | -----         |
|       | total | -7.580653E-04 | 1.048109E-03  | -2.834393E-04 |

end of program der1b

start of program geopt 30

geometry optimization step 30

reading input hessian of dimension 108

in five columns format

reading input hessian of dimension 108

in five columns format

Level shifts adjusted to satisfy step-size constraints

Step size: 0.0102779

Cos(theta): 0.7505295

Final level shift: -7.0341646E-02

energy change: 9.5898E-06 \* ( 5.0000E-05 )

gradient maximum: 6.9613E-04 . ( 4.5000E-04 )

S427

gradient rms: 1.5767E-04 \* ( 3.0000E-04 )  
 step size: 0.01028 trust radius: 0.01000  
 displacement maximum: 5.2263E-03 . ( 1.8000E-03 )  
 displacement rms: 9.3052E-04 \* ( 1.2000E-03 )  
 predicted energy change: -1.0432E-05 geom step: 1.0278E-  
 02 full step: 1.0278E-02  
 molecular structure not yet converged...

center of mass moved by:  
 x: -5.7134E-04 y: 2.5290E-04 z: 2.3719E-04

new geometry:

|      | angstroms     |               |               |
|------|---------------|---------------|---------------|
| atom | x             | y             | z             |
| H1   | -1.1805123374 | 1.8867936054  | -2.2324492312 |
| C1   | -1.0987022558 | 2.1199966291  | -1.1843885336 |
| C2   | -0.8843825584 | 2.6957770680  | 1.5030058967  |
| C3   | -0.8792396632 | 1.0866573611  | -0.2887712064 |
| C4   | -1.2044006184 | 3.4345052928  | -0.7612731570 |
| C5   | -1.0975679291 | 3.7143600833  | 0.5887152380  |
| C6   | -0.7681579294 | 1.3778353300  | 1.0726376556  |
| C7   | -0.7867729005 | -0.3526760767 | -0.7561339119 |
| H3   | -1.3702777808 | 4.2227221699  | -1.4734774897 |
| H4   | -1.1841535528 | 4.7269811065  | 0.9415477882  |
| H6   | -0.8158280791 | 2.9345404458  | 2.5464881850  |
| C16  | 0.6129672682  | -0.7638347851 | -1.2107899090 |
| C8   | -1.3970719193 | -1.2506771706 | 0.3428740029  |
| N2   | -0.5101316193 | 0.3384333396  | 1.9940885887  |
| C9   | -0.7808855476 | -0.9768080678 | 1.7049086498  |
| C10  | 0.0076980643  | 0.6568999616  | 3.3166329033  |
| O1   | -0.5787381399 | -1.8505929524 | 2.5000946720  |
| C23  | -1.3851990770 | -2.7424650809 | 0.0243381872  |
| C18  | 3.1404059156  | -1.5847881970 | -2.0943049621 |
| C19  | 0.7609888794  | -1.4793841273 | -2.3943718788 |
| C20  | 1.7587886750  | -0.4564976935 | -0.4810318407 |
| C21  | 3.0080832709  | -0.8660365856 | -0.9160622612 |
| C22  | 2.0107577591  | -1.8880458188 | -2.8348320802 |
| H2   | -0.1092374759 | -1.7227952576 | -2.9805504868 |
| H5   | 1.6825896955  | 0.1100065804  | 0.4278922490  |
| H7   | 3.8793407938  | -0.6196926036 | -0.3347464705 |
| H8   | 2.0981974813  | -2.4402295888 | -3.7544900465 |
| H9   | 4.1122043722  | -1.8998594056 | -2.4316268240 |
| H10  | -1.4335227037 | -0.4540695253 | -1.6214064104 |
| H19  | -0.3749732186 | -3.1288677070 | -0.0210363964 |
| H20  | -1.8643494741 | -2.9207585335 | -0.9338201340 |
| H21  | -1.9188234392 | -3.2944596906 | 0.7864235050  |
| H22  | -2.4344262036 | -0.9277216856 | 0.4410460566  |
| H11  | 0.8111674768  | 1.3783551672  | 3.2304635014  |
| H12  | 0.3822797976  | -0.2495114785 | 3.7591361978  |
| H13  | -0.7665827175 | 1.0649690285  | 3.9588532714  |

nuclear repulsion energy..... 1414.900937188 hartrees



-----  
/ end of geometry optimization iteration 30 /  
-----

end of program geopt

start of program onee  
smallest eigenvalue of S: 3.333E-04  
number of canonical orbitals..... 368  
end of program onee

start of program probe  
end of program probe

start of program grid

number of gridpoints:  
atom H1 C1 C2 C3 C4 C5 C6  
C7  
grid # 1 72 87 89 90 89 88 84  
81  
grid # 2 116 97 96 98 97 97 94  
90  
grid # 3 217 182 184 194 183 184 189  
177  
grid # 4 216 326 328 338 328 328 323  
314

number of gridpoints:  
atom H3 H4 H6 C16 C8 N2 C9  
C10  
grid # 1 73 73 70 92 82 95 82  
69  
grid # 2 118 118 112 100 90 105 92  
78  
grid # 3 223 223 207 194 174 211 176  
147  
grid # 4 224 223 207 342 311 387 293  
275

number of gridpoints:  
atom O1 C23 C18 C19 C20 C21 C22  
H2  
grid # 1 111 74 89 88 88 89 89  
71  
grid # 2 123 80 97 95 96 97 96  
112  
grid # 3 257 149 183 183 182 184 183  
212

grid # 4      450      286      327      326      327      327      327  
 211

number of gridpoints:

| atom     | H5  | H7  | H8  | H9  | H10 | H19 | H20 |
|----------|-----|-----|-----|-----|-----|-----|-----|
| grid # 1 | 71  | 73  | 73  | 73  | 67  | 71  | 71  |
| grid # 2 | 111 | 118 | 118 | 118 | 106 | 108 | 110 |
| grid # 3 | 212 | 223 | 223 | 224 | 202 | 218 | 216 |
| grid # 4 | 207 | 223 | 224 | 224 | 197 | 212 | 216 |

number of gridpoints:

| atom     | H22 | H11 | H12 | H13 | total |
|----------|-----|-----|-----|-----|-------|
| grid # 1 | 69  | 71  | 70  | 71  | 2865  |
| grid # 2 | 110 | 109 | 107 | 111 | 3728  |
| grid # 3 | 214 | 214 | 212 | 217 | 7190  |
| grid # 4 | 211 | 211 | 209 | 218 | 9911  |

end of program grid

start of program rwr

end of program rwr

start of program scf

|      | i | u | d | i | g |                  | RMS      | maximum |
|------|---|---|---|---|---|------------------|----------|---------|
|      | t | p | i | c | r |                  | energy   | DIIS    |
|      | e | d | i | u | i | total energy     | density  | error   |
|      | r | t | s | t | d | change           | change   |         |
| etot | 1 | N | N | 1 | U | -783.03316267992 | 2.3E-05  | 1.2E-03 |
| etot | 2 | Y | Y | 4 | M | -783.03324716945 | 8.4E-05  | 4.7E-04 |
| etot | 3 | Y | Y | 4 | M | -783.03326193495 | 1.5E-05  | 1.2E-04 |
| etot | 4 | Y | N | 4 | M | -783.03326085436 | -1.1E-06 | 0.0E+00 |

Energy components, in hartrees:

|     |                               |                   |       |
|-----|-------------------------------|-------------------|-------|
| (A) | Nuclear repulsion.....        | 1414.90093718834  |       |
| (E) | Total one-electron terms..... | -3874.37502559364 |       |
| (I) | Total two-electron terms..... | 1676.44082755094  |       |
| (L) | Electronic energy.....        | -2197.93419804270 | (E+I) |
| (N) | Total energy.....             | -783.03326085436  | (A+L) |

SCFE: SCF energy: HF      -783.03326085436 hartrees      iterations:

4

HOMO energy: -0.30202  
LUMO energy: 0.12927

Orbital energies:

|           |           |           |           |           |           |
|-----------|-----------|-----------|-----------|-----------|-----------|
| -20.52693 | -15.60015 | -11.34589 | -11.28577 | -11.25657 | -11.24982 |
| -11.24300 | -11.24134 | -11.24049 | -11.23869 | -11.23788 | -11.23489 |
| -11.23147 | -11.23060 | -11.23013 | -11.22981 | -11.22868 | -11.22759 |
| -11.20920 | -1.39744  | -1.26945  | -1.16501  | -1.14893  | -1.10597  |
| -1.03001  | -1.01862  | -1.01781  | -1.01269  | -0.96256  | -0.93266  |
| -0.85808  | -0.83889  | -0.83326  | -0.82165  | -0.79604  | -0.74108  |
| -0.71095  | -0.69497  | -0.67283  | -0.66426  | -0.64456  | -0.63755  |
| -0.62742  | -0.61486  | -0.61225  | -0.60851  | -0.59697  | -0.58334  |
| -0.57626  | -0.55334  | -0.54870  | -0.54064  | -0.53101  | -0.51901  |
| -0.51489  | -0.50718  | -0.50097  | -0.49775  | -0.48457  | -0.46861  |
| -0.46285  | -0.42151  | -0.41151  | -0.34255  | -0.33293  | -0.32285  |
| -0.30202  | 0.12927   | 0.13403   | 0.14450   | 0.15237   | 0.20396   |
| 0.22970   | 0.24104   | 0.24878   | 0.26135   | 0.28821   |           |

end of program scf

start of program derla  
end of program derla

start of program rwr  
end of program rwr

start of program derlb

forces (hartrees/bohr) : total

| atom | label | x             | y             | z             |
|------|-------|---------------|---------------|---------------|
| 1    | H1    | -1.426589E-05 | 1.851512E-05  | 3.087180E-05  |
| 2    | C1    | -3.684092E-05 | 8.102257E-05  | -9.089714E-05 |
| 3    | C2    | -8.044580E-05 | 1.582930E-04  | 4.084435E-05  |
| 4    | C3    | -1.664687E-05 | -2.696388E-05 | -1.842010E-04 |
| 5    | C4    | -1.838719E-05 | 1.079364E-04  | 5.562918E-05  |
| 6    | C5    | -3.254149E-05 | 6.980998E-05  | -3.444434E-05 |
| 7    | C6    | 1.237987E-04  | -3.684853E-05 | 1.446596E-04  |
| 8    | C7    | -1.452748E-04 | -3.450633E-05 | -7.213955E-05 |
| 9    | H3    | -7.641201E-07 | -2.547748E-05 | 4.682395E-05  |
| 10   | H4    | -7.293925E-06 | -3.079856E-05 | -1.251058E-05 |
| 11   | H6    | -3.496943E-05 | 4.155554E-05  | -5.383499E-05 |
| 12   | C16   | -5.004429E-05 | -2.187798E-04 | -8.074203E-05 |
| 13   | C8    | 1.725416E-04  | 8.367618E-05  | 3.420425E-05  |
| 14   | N2    | -1.302220E-04 | 2.592129E-04  | -5.062677E-04 |
| 15   | C9    | -9.589599E-05 | 9.124701E-05  | 2.739530E-04  |
| 16   | C10   | 1.282326E-05  | 1.094053E-04  | -1.801434E-05 |

S431

|       |       |               |               |               |
|-------|-------|---------------|---------------|---------------|
| 17    | O1    | 1.872458E-05  | -1.381686E-04 | 6.135473E-05  |
| 18    | C23   | 4.559994E-05  | -5.292458E-05 | 1.914318E-05  |
| 19    | C18   | -1.373014E-04 | 3.592146E-05  | -5.941809E-05 |
| 20    | C19   | -4.120612E-05 | 5.938575E-05  | -1.533590E-05 |
| 21    | C20   | -2.492204E-05 | -2.159300E-04 | -2.948217E-04 |
| 22    | C21   | -1.035986E-04 | -1.029270E-05 | -1.834305E-04 |
| 23    | C22   | 1.698841E-05  | 3.331820E-05  | 4.922204E-05  |
| 24    | H2    | 1.502027E-04  | 1.049101E-04  | 1.597948E-04  |
| 25    | H5    | -3.682739E-05 | 2.895247E-04  | 1.828157E-04  |
| 26    | H7    | 3.172094E-05  | 6.790982E-05  | 1.109181E-05  |
| 27    | H8    | -1.532688E-05 | 6.759531E-05  | 1.418245E-04  |
| 28    | H9    | -4.032796E-05 | 5.556332E-05  | 1.230163E-05  |
| 29    | H10   | 4.007010E-05  | 6.090349E-05  | 2.669803E-05  |
| 30    | H19   | -1.590801E-04 | 1.191706E-04  | 1.113621E-05  |
| 31    | H20   | -5.356989E-05 | 9.065189E-06  | 1.585560E-05  |
| 32    | H21   | 5.125398E-05  | 8.272473E-05  | -1.302354E-04 |
| 33    | H22   | -2.098380E-05 | 3.016177E-05  | -5.339662E-06 |
| 34    | H11   | -1.555313E-04 | -1.591497E-06 | 4.876376E-06  |
| 35    | H12   | -2.306733E-05 | -1.300998E-04 | 6.292347E-05  |
| 36    | H13   | 7.240151E-05  | -6.950884E-06 | 6.617608E-05  |
| ----- |       | -----         | -----         | -----         |
|       | total | -7.392099E-04 | 1.107496E-03  | -2.894327E-04 |

end of program derlb

start of program geopt 31

geometry optimization step 31

reading input hessian of dimension 108

in five columns format

reading input hessian of dimension 108

in five columns format

Level shifts adjusted to satisfy step-size constraints

Step size: 0.0101118

Cos(theta): 0.6906135

Final level shift: -5.5148463E-02

energy change: -8.3485E-06 \* ( 5.0000E-05 )

gradient maximum: 7.1732E-04 . ( 4.5000E-04 )

gradient rms: 1.5254E-04 \* ( 3.0000E-04 )

step size: 0.01011 trust radius: 0.01000

displacement maximum: 5.8173E-03 . ( 1.8000E-03 )

displacement rms: 9.1548E-04 \* ( 1.2000E-03 )

predicted energy change: -8.7025E-06 geom step: 1.0112E-

02 full step: 1.0112E-02

molecular structure not yet converged...

center of mass moved by:

x: 2.9380E-04 y: -2.7459E-04 z: -1.1282E-04

new geometry:

|      | angstroms     |               |               |
|------|---------------|---------------|---------------|
| atom | x             | y             | z             |
| H1   | -1.1784744123 | 1.8882686829  | -2.2322594255 |
| C1   | -1.0967446034 | 2.1208831420  | -1.1841335713 |
| C2   | -0.8830373084 | 2.6953892194  | 1.5038482133  |
| C3   | -0.8783475037 | 1.0868126030  | -0.2890727080 |
| C4   | -1.2015304023 | 3.4353320382  | -0.7601208114 |
| C5   | -1.0951307495 | 3.7145049023  | 0.5899771324  |
| C6   | -0.7673169578 | 1.3774970381  | 1.0727614418  |
| C7   | -0.7868439381 | -0.3527298733 | -0.7564234333 |
| H3   | -1.3664262171 | 4.2239737886  | -1.4718630474 |
| H4   | -1.1810954908 | 4.7268859831  | 0.9433773969  |
| H6   | -0.8149588001 | 2.9337410893  | 2.5473698676  |
| C16  | 0.6128511509  | -0.7649325879 | -1.2105679736 |
| C8   | -1.3976156064 | -1.2503023581 | 0.3426200054  |
| N2   | -0.5106931159 | 0.3377130855  | 1.9935686305  |
| C9   | -0.7821390684 | -0.9775165660 | 1.7050335478  |
| C10  | 0.0048942744  | 0.6539187767  | 3.3178642090  |
| O1   | -0.5809843376 | -1.8520860195 | 2.4998650317  |
| C23  | -1.3875177400 | -2.7419672636 | 0.0232398106  |
| C18  | 3.1407294868  | -1.5828826129 | -2.0950773323 |
| C19  | 0.7606971708  | -1.4863862054 | -2.3900044755 |
| C20  | 1.7592997626  | -0.4491332063 | -0.4859378804 |
| C21  | 3.0087791720  | -0.8570290192 | -0.9214878133 |
| C22  | 2.0105218153  | -1.8942323263 | -2.8306348223 |
| H2   | -0.1097528079 | -1.7347063758 | -2.9725726183 |
| H5   | 1.6836488840  | 0.1258064947  | 0.4186229251  |
| H7   | 3.8807931579  | -0.6035270362 | -0.3441030183 |
| H8   | 2.0976672541  | -2.4518383725 | -3.7465653319 |
| H9   | 4.1128405038  | -1.8966485085 | -2.4325954368 |
| H10  | -1.4331399944 | -0.4534524564 | -1.6219120036 |
| H19  | -0.3778783778 | -3.1284374996 | -0.0247114455 |
| H20  | -1.8695078423 | -2.9198717239 | -0.9335613779 |
| H21  | -1.9193041409 | -3.2939911842 | 0.7860854492  |
| H22  | -2.4347534552 | -0.9265059201 | 0.4406753525  |
| H11  | 0.8083771744  | 1.3751915459  | 3.2345944718  |
| H12  | 0.3778997877  | -0.2541376147 | 3.7594204689  |
| H13  | -0.7698714217 | 1.0606886361  | 3.9604132089  |

nuclear repulsion energy..... 1414.901924449 hartrees

-----  
/ end of geometry optimization iteration 31 /  
-----

end of program geopt

start of program onee  
smallest eigenvalue of S: 3.335E-04

S433

number of canonical orbitals..... 368  
end of program onee

start of program probe  
end of program probe

start of program grid

number of gridpoints:

| atom     | H1  | C1  | C2  | C3  | C4  | C5  | C6  |
|----------|-----|-----|-----|-----|-----|-----|-----|
| C7       |     |     |     |     |     |     |     |
| grid # 1 | 72  | 87  | 89  | 89  | 89  | 88  | 83  |
| 81       |     |     |     |     |     |     |     |
| grid # 2 | 116 | 97  | 96  | 98  | 97  | 97  | 95  |
| 90       |     |     |     |     |     |     |     |
| grid # 3 | 217 | 182 | 184 | 194 | 183 | 184 | 189 |
| 177      |     |     |     |     |     |     |     |
| grid # 4 | 216 | 326 | 328 | 338 | 328 | 328 | 325 |
| 314      |     |     |     |     |     |     |     |

number of gridpoints:

| atom     | H3  | H4  | H6  | C16 | C8  | N2  | C9  |
|----------|-----|-----|-----|-----|-----|-----|-----|
| C10      |     |     |     |     |     |     |     |
| grid # 1 | 73  | 73  | 70  | 92  | 82  | 95  | 82  |
| 70       |     |     |     |     |     |     |     |
| grid # 2 | 118 | 118 | 112 | 100 | 90  | 105 | 92  |
| 80       |     |     |     |     |     |     |     |
| grid # 3 | 223 | 223 | 207 | 194 | 174 | 211 | 176 |
| 143      |     |     |     |     |     |     |     |
| grid # 4 | 224 | 223 | 207 | 342 | 311 | 387 | 293 |
| 272      |     |     |     |     |     |     |     |

number of gridpoints:

| atom     | O1  | C23 | C18 | C19 | C20 | C21 | C22 |
|----------|-----|-----|-----|-----|-----|-----|-----|
| H2       |     |     |     |     |     |     |     |
| grid # 1 | 111 | 73  | 89  | 88  | 88  | 89  | 89  |
| 71       |     |     |     |     |     |     |     |
| grid # 2 | 123 | 79  | 97  | 95  | 96  | 97  | 96  |
| 112      |     |     |     |     |     |     |     |
| grid # 3 | 256 | 148 | 183 | 183 | 182 | 184 | 183 |
| 212      |     |     |     |     |     |     |     |
| grid # 4 | 450 | 287 | 327 | 326 | 327 | 327 | 327 |
| 211      |     |     |     |     |     |     |     |

number of gridpoints:

| atom     | H5 | H7 | H8 | H9 | H10 | H19 | H20 |
|----------|----|----|----|----|-----|-----|-----|
| H21      |    |    |    |    |     |     |     |
| grid # 1 | 71 | 73 | 73 | 73 | 66  | 71  | 71  |
| 70       |    |    |    |    |     |     |     |

```

grid # 2      111    118    118    118    106    108    110
108
grid # 3      212    223    223    224    203    218    217
217
grid # 4      207    223    224    224    196    212    216
215

```

number of gridpoints:

| atom     | H22 | H11 | H12 | H13 | total |
|----------|-----|-----|-----|-----|-------|
| grid # 1 | 69  | 71  | 70  | 71  | 2862  |
| grid # 2 | 110 | 109 | 107 | 111 | 3730  |
| grid # 3 | 214 | 214 | 213 | 217 | 7187  |
| grid # 4 | 211 | 211 | 209 | 218 | 9910  |

end of program grid

start of program rwr

end of program rwr

start of program scf

|      | i | u | d | i | g |                  | RMS     | maximum |
|------|---|---|---|---|---|------------------|---------|---------|
|      | t | p | i | c | r |                  | energy  | DIIS    |
|      | e | d | i | u | i | total energy     | density | error   |
|      | r | t | s | t | d |                  | change  |         |
| etot | 1 | N | N | 1 | U | -783.03314183079 | 2.3E-05 | 1.3E-03 |
| etot | 2 | Y | Y | 4 | M | -783.03323427007 | 9.2E-05 | 5.1E-04 |
| etot | 3 | Y | Y | 4 | M | -783.03324530875 | 1.1E-05 | 1.3E-04 |
| etot | 4 | Y | N | 4 | M | -783.03324859431 | 3.3E-06 | 0.0E+00 |

Energy components, in hartrees:

|     |                               |                   |       |
|-----|-------------------------------|-------------------|-------|
| (A) | Nuclear repulsion.....        | 1414.90192444893  |       |
| (E) | Total one-electron terms..... | -3874.36872250592 |       |
| (I) | Total two-electron terms..... | 1676.43354946267  |       |
| (L) | Electronic energy.....        | -2197.93517304324 | (E+I) |
| (N) | Total energy.....             | -783.03324859431  | (A+L) |

SCFE: SCF energy: HF -783.03324859431 hartrees iterations:  
4

HOMO energy: -0.30208  
LUMO energy: 0.12928

Orbital energies:

|           |           |           |           |           |           |
|-----------|-----------|-----------|-----------|-----------|-----------|
| -20.52666 | -15.60059 | -11.34617 | -11.28621 | -11.25660 | -11.25008 |
| -11.24312 | -11.24173 | -11.24054 | -11.23854 | -11.23794 | -11.23494 |
| -11.23118 | -11.23054 | -11.22998 | -11.22951 | -11.22849 | -11.22780 |

|           |          |          |          |          |          |
|-----------|----------|----------|----------|----------|----------|
| -11.20904 | -1.39737 | -1.26972 | -1.16517 | -1.14901 | -1.10608 |
| -1.03013  | -1.01869 | -1.01794 | -1.01270 | -0.96259 | -0.93279 |
| -0.85824  | -0.83902 | -0.83336 | -0.82171 | -0.79613 | -0.74122 |
| -0.71102  | -0.69502 | -0.67288 | -0.66434 | -0.64466 | -0.63757 |
| -0.62743  | -0.61491 | -0.61226 | -0.60861 | -0.59695 | -0.58331 |
| -0.57638  | -0.55341 | -0.54884 | -0.54070 | -0.53100 | -0.51904 |
| -0.51484  | -0.50724 | -0.50110 | -0.49778 | -0.48458 | -0.46869 |
| -0.46289  | -0.42166 | -0.41156 | -0.34265 | -0.33293 | -0.32295 |
| -0.30208  | 0.12928  | 0.13405  | 0.14444  | 0.15225  | 0.20386  |
| 0.22975   | 0.24098  | 0.24890  | 0.26128  | 0.28808  |          |

end of program scf

start of program derla  
end of program derla

start of program rwr  
end of program rwr

start of program derlb

forces (hartrees/bohr) : total

| atom | label | x             | y             | z             |
|------|-------|---------------|---------------|---------------|
| 1    | H1    | -2.404742E-05 | 4.754667E-05  | -5.579707E-05 |
| 2    | C1    | -9.904101E-06 | -1.436199E-05 | 6.727049E-05  |
| 3    | C2    | -3.461521E-05 | -1.041731E-04 | -4.711985E-05 |
| 4    | C3    | 2.227234E-05  | 7.161678E-05  | 1.778311E-04  |
| 5    | C4    | -2.171104E-05 | -3.543799E-05 | -6.650890E-05 |
| 6    | C5    | -8.482687E-06 | 4.211565E-06  | 9.650904E-06  |
| 7    | C6    | -6.561724E-05 | 1.017547E-04  | -2.094072E-04 |
| 8    | C7    | 5.568391E-05  | 9.659257E-05  | 5.633930E-05  |
| 9    | H3    | -4.124406E-05 | 9.581958E-05  | -6.999536E-05 |
| 10   | H4    | -3.323500E-05 | 9.574344E-05  | -6.826367E-06 |
| 11   | H6    | -1.672949E-05 | 2.761841E-05  | 4.072736E-05  |
| 12   | C16   | -3.276049E-05 | 3.124763E-04  | 1.021785E-04  |
| 13   | C8    | -1.500623E-04 | -3.081351E-05 | -5.916262E-05 |
| 14   | N2    | 8.524857E-06  | -2.576460E-04 | 3.772233E-04  |
| 15   | C9    | -1.787851E-05 | 2.106387E-05  | -2.125153E-04 |
| 16   | C10   | -1.850964E-05 | -1.984251E-04 | 8.167635E-05  |
| 17   | O1    | -4.860174E-05 | 2.642578E-04  | -6.242037E-05 |
| 18   | C23   | -6.418195E-05 | 9.729238E-05  | -4.928060E-05 |
| 19   | C18   | 1.517736E-04  | 1.543276E-05  | 2.632914E-05  |
| 20   | C19   | 1.828600E-05  | -3.257051E-05 | -4.238181E-05 |
| 21   | C20   | 3.879775E-06  | 3.184401E-04  | 3.605515E-04  |
| 22   | C21   | 8.513977E-05  | 1.128959E-04  | 2.290449E-04  |
| 23   | C22   | -1.162292E-04 | 2.048146E-05  | -7.562564E-05 |
| 24   | H2    | -2.195842E-04 | -4.722278E-05 | -2.136909E-04 |



|       |     |               |               |               |
|-------|-----|---------------|---------------|---------------|
| 25    | H5  | 1.202067E-06  | -2.483266E-04 | -2.179985E-04 |
| 26    | H7  | -6.505745E-05 | -1.791902E-05 | -6.458551E-06 |
| 27    | H8  | -2.704162E-05 | -3.839012E-05 | -2.191198E-04 |
| 28    | H9  | 9.522707E-08  | -1.786897E-06 | -3.456762E-05 |
| 29    | H10 | -7.719892E-05 | -4.181916E-06 | -4.876142E-05 |
| 30    | H19 | 7.990887E-05  | -4.540067E-05 | -1.182281E-05 |
| 31    | H20 | 6.020711E-07  | 4.309701E-05  | -3.990120E-05 |
| 32    | H21 | -9.219832E-05 | -2.416461E-05 | 9.527453E-05  |
| 33    | H22 | -2.795877E-05 | 1.804357E-05  | -8.307698E-06 |
| 34    | H11 | 6.067803E-05  | 1.184266E-04  | -8.954794E-06 |
| 35    | H12 | -1.145550E-06 | 2.112025E-04  | -7.644332E-05 |
| 36    | H13 | -3.296717E-05 | 4.069534E-05  | -6.754898E-05 |
| ----- |     | -----         | -----         | -----         |
| total |     | -7.589155E-04 | 1.033889E-03  | -2.865194E-04 |

end of program derlb

start of program geopt 32

geometry optimization step 32

reading input hessian of dimension 108  
in five columns format  
reading input hessian of dimension 108  
in five columns format

Level shifts adjusted to satisfy step-size constraints

Step size: 0.0102773  
Cos(theta): 0.7376274

Final level shift: -6.8396735E-02

energy change: 1.2260E-05 \* ( 5.0000E-05 )  
gradient maximum: 7.8834E-04 . ( 4.5000E-04 )  
gradient rms: 1.5954E-04 \* ( 3.0000E-04 )  
step size: 0.01028 trust radius: 0.01000  
displacement maximum: 5.7136E-03 . ( 1.8000E-03 )  
displacement rms: 9.3046E-04 \* ( 1.2000E-03 )  
predicted energy change: -1.0292E-05 geom step: 1.0277E-  
02 full step: 1.0277E-02  
molecular structure not yet converged...

center of mass moved by:

x: -2.9503E-04 y: 3.6280E-04 z: 9.8901E-05

new geometry:

|      |               |              |               | angstroms |  |  |
|------|---------------|--------------|---------------|-----------|--|--|
| atom | x             | y            | z             |           |  |  |
| H1   | -1.1805469221 | 1.8871065150 | -2.2325080955 |           |  |  |
| C1   | -1.0988018271 | 2.1202148201 | -1.1844178494 |           |  |  |
| C2   | -0.8848399873 | 2.6957931242 | 1.5030543100  |           |  |  |

|     |               |               |               |
|-----|---------------|---------------|---------------|
| C3  | -0.8790852409 | 1.0868307254  | -0.2888915767 |
| C4  | -1.2048523630 | 3.4346778980  | -0.7611763057 |
| C5  | -1.0982645768 | 3.7144259083  | 0.5888494252  |
| C6  | -0.7680390380 | 1.3779370274  | 1.0725165604  |
| C7  | -0.7866142635 | -0.3524915012 | -0.7562610005 |
| H3  | -1.3709022057 | 4.2229251928  | -1.4733231220 |
| H4  | -1.1852497070 | 4.7269863058  | 0.9417739198  |
| H6  | -0.8165507445 | 2.9344238949  | 2.5465994659  |
| C16 | 0.6131272469  | -0.7637685331 | -1.2108095181 |
| C8  | -1.3970097962 | -1.2505024504 | 0.3427308504  |
| N2  | -0.5098040126 | 0.3384788708  | 1.9937854999  |
| C9  | -0.7809355634 | -0.9765945483 | 1.7048157628  |
| C10 | 0.0083396287  | 0.6566971508  | 3.3163660524  |
| O1  | -0.5789335304 | -1.8502341960 | 2.5001359852  |
| C23 | -1.3852657685 | -2.7422724180 | 0.0241824476  |
| C18 | 3.1404148198  | -1.5854237388 | -2.0939425258 |
| C19 | 0.7611089937  | -1.4794590906 | -2.3943597503 |
| C20 | 1.7589434982  | -0.4566431409 | -0.4808693049 |
| C21 | 3.0081789542  | -0.8665521987 | -0.9157180876 |
| C22 | 2.0107816632  | -1.8884398146 | -2.8346390249 |
| H2  | -0.1091270565 | -1.7227541450 | -2.9806379214 |
| H5  | 1.6827206767  | 0.1098192276  | 0.4280427660  |
| H7  | 3.8794050477  | -0.6204806029 | -0.3342727882 |
| H8  | 2.0981865684  | -2.4407343996 | -3.7542895653 |
| H9  | 4.1121430887  | -1.9008311425 | -2.4311357817 |
| H10 | -1.4333317032 | -0.4538725069 | -1.6215498898 |
| H19 | -0.3751247902 | -3.1286472974 | -0.0211710045 |
| H20 | -1.8644863918 | -2.9205929678 | -0.9339427550 |
| H21 | -1.9188688753 | -3.2942339980 | 0.7862226037  |
| H22 | -2.4343333792 | -0.9275445183 | 0.4408235038  |
| H11 | 0.8106521702  | 1.3794743443  | 3.2303002823  |
| H12 | 0.3845231136  | -0.2494763252 | 3.7579642006  |
| H13 | -0.7660019670 | 1.0631393006  | 3.9596008050  |

nuclear repulsion energy..... 1414.901765060 hartrees

-----  
 / end of geometry optimization iteration 32 /  
 -----

end of program geopt

start of program onee

smallest eigenvalue of S: 3.333E-04

number of canonical orbitals..... 368

end of program onee

start of program probe

end of program probe

start of program grid

number of gridpoints:

| atom     | H1  | C1  | C2  | C3  | C4  | C5  | C6  |
|----------|-----|-----|-----|-----|-----|-----|-----|
| C7       |     |     |     |     |     |     |     |
| grid # 1 | 72  | 87  | 89  | 90  | 89  | 88  | 84  |
| 81       |     |     |     |     |     |     |     |
| grid # 2 | 116 | 97  | 96  | 98  | 97  | 97  | 94  |
| 90       |     |     |     |     |     |     |     |
| grid # 3 | 217 | 182 | 184 | 194 | 183 | 184 | 189 |
| 177      |     |     |     |     |     |     |     |
| grid # 4 | 216 | 326 | 328 | 338 | 328 | 328 | 323 |
| 314      |     |     |     |     |     |     |     |

number of gridpoints:

| atom     | H3  | H4  | H6  | C16 | C8  | N2  | C9  |
|----------|-----|-----|-----|-----|-----|-----|-----|
| C10      |     |     |     |     |     |     |     |
| grid # 1 | 73  | 73  | 70  | 92  | 82  | 95  | 82  |
| 69       |     |     |     |     |     |     |     |
| grid # 2 | 118 | 118 | 112 | 100 | 90  | 105 | 92  |
| 78       |     |     |     |     |     |     |     |
| grid # 3 | 223 | 223 | 207 | 194 | 174 | 211 | 176 |
| 147      |     |     |     |     |     |     |     |
| grid # 4 | 224 | 223 | 207 | 342 | 311 | 387 | 293 |
| 275      |     |     |     |     |     |     |     |

number of gridpoints:

| atom     | O1  | C23 | C18 | C19 | C20 | C21 | C22 |
|----------|-----|-----|-----|-----|-----|-----|-----|
| H2       |     |     |     |     |     |     |     |
| grid # 1 | 111 | 74  | 89  | 88  | 88  | 89  | 89  |
| 71       |     |     |     |     |     |     |     |
| grid # 2 | 123 | 80  | 97  | 95  | 96  | 97  | 96  |
| 112      |     |     |     |     |     |     |     |
| grid # 3 | 257 | 150 | 183 | 183 | 182 | 184 | 183 |
| 212      |     |     |     |     |     |     |     |
| grid # 4 | 450 | 286 | 327 | 326 | 327 | 327 | 327 |
| 211      |     |     |     |     |     |     |     |

number of gridpoints:

| atom     | H5  | H7  | H8  | H9  | H10 | H19 | H20 |
|----------|-----|-----|-----|-----|-----|-----|-----|
| H21      |     |     |     |     |     |     |     |
| grid # 1 | 71  | 73  | 73  | 73  | 67  | 71  | 71  |
| 70       |     |     |     |     |     |     |     |
| grid # 2 | 111 | 118 | 118 | 118 | 106 | 108 | 110 |
| 108      |     |     |     |     |     |     |     |
| grid # 3 | 212 | 223 | 223 | 224 | 202 | 218 | 216 |
| 217      |     |     |     |     |     |     |     |
| grid # 4 | 207 | 223 | 224 | 224 | 197 | 212 | 216 |
| 215      |     |     |     |     |     |     |     |

number of gridpoints:

| atom | H22 | H11 | H12 | H13 | total |
|------|-----|-----|-----|-----|-------|
|------|-----|-----|-----|-----|-------|

```

grid # 1      69      71      70      71      2865
grid # 2     110     109     107     111     3728
grid # 3     214     214     212     217     7191
grid # 4     211     211     209     218     9911

```

end of program grid

```

start of program rwr
end of program rwr

```

start of program scf

|      | i | u | d | i | g |                  | energy   | RMS     | maximum |
|------|---|---|---|---|---|------------------|----------|---------|---------|
|      | t | p | i | c | r |                  | change   | density | DIIS    |
|      | e | d | i | u | i | total energy     |          | change  | error   |
|      | r | t | s | t | d |                  |          |         |         |
| etot | 1 | N | N | 1 | U | -783.03314743173 |          | 2.4E-05 | 1.3E-03 |
| etot | 2 | Y | Y | 4 | M | -783.03324478760 | 9.7E-05  | 1.1E-05 | 5.1E-04 |
| etot | 3 | Y | Y | 4 | M | -783.03326229853 | 1.8E-05  | 3.6E-06 | 1.3E-04 |
| etot | 4 | Y | N | 4 | M | -783.03326106824 | -1.2E-06 | 0.0E+00 | 0.0E+00 |

Energy components, in hartrees:

```

(A) Nuclear repulsion..... 1414.90176505953
(E) Total one-electron terms..... -3874.37697560531
(I) Total two-electron terms..... 1676.44194947754
(L) Electronic energy..... -2197.93502612777 (E+I)
(N) Total energy..... -783.03326106824 (A+L)

```

```

SCFE: SCF energy: HF      -783.03326106824 hartrees  iterations:
4

```

```

HOMO energy:      -0.30202
LUMO energy:       0.12927

```

Orbital energies:

```

-20.52694  -15.60012  -11.34584  -11.28575  -11.25658  -11.24981
-11.24298  -11.24133  -11.24050  -11.23870  -11.23789  -11.23490
-11.23148  -11.23060  -11.23015  -11.22981  -11.22869  -11.22759
-11.20918  -1.39747   -1.26945   -1.16500   -1.14893   -1.10596
-1.03001   -1.01861   -1.01780   -1.01269   -0.96256   -0.93266
-0.85808   -0.83890   -0.83325   -0.82165   -0.79604   -0.74108
-0.71095   -0.69497   -0.67283   -0.66426   -0.64456   -0.63754
-0.62742   -0.61486   -0.61224   -0.60849   -0.59695   -0.58335
-0.57625   -0.55335   -0.54871   -0.54064   -0.53101   -0.51902
-0.51488   -0.50717   -0.50097   -0.49774   -0.48457   -0.46861
-0.46284   -0.42151   -0.41150   -0.34254   -0.33294   -0.32284
-0.30202   0.12927    0.13402    0.14450    0.15237    0.20398

```

0.22970 0.24104 0.24880 0.26135 0.28823

end of program scf

start of program derla  
end of program derla

start of program rwr  
end of program rwr

start of program derlb

forces (hartrees/bohr) : total

| atom | label | x             | y             | z             |
|------|-------|---------------|---------------|---------------|
| 1    | H1    | -1.419761E-05 | 1.695766E-05  | 3.451910E-05  |
| 2    | C1    | -3.367334E-05 | 9.312170E-05  | -8.954056E-05 |
| 3    | C2    | -6.942521E-05 | 1.548285E-04  | 3.166290E-05  |
| 4    | C3    | -2.689030E-05 | -9.322543E-06 | -2.003455E-04 |
| 5    | C4    | -1.968315E-05 | 8.996926E-05  | 4.508059E-05  |
| 6    | C5    | -2.707885E-05 | 5.976129E-05  | -2.061409E-05 |
| 7    | C6    | 8.972692E-05  | 3.456596E-06  | 1.488584E-04  |
| 8    | C7    | -1.299157E-04 | -4.857736E-05 | -6.538914E-05 |
| 9    | H3    | 2.345681E-06  | -3.370563E-05 | 5.270973E-05  |
| 10   | H4    | -5.421775E-06 | -3.746798E-05 | -1.234728E-05 |
| 11   | H6    | -3.521005E-05 | 3.644945E-05  | -6.042547E-05 |
| 12   | C16   | -3.388753E-05 | -2.351240E-04 | -8.233923E-05 |
| 13   | C8    | 1.571356E-04  | 9.550692E-05  | 2.629882E-05  |
| 14   | N2    | -9.565829E-05 | 3.705487E-04  | -3.808719E-04 |
| 15   | C9    | -8.838899E-05 | 5.709793E-05  | 1.859701E-04  |
| 16   | C10   | 1.319897E-05  | 1.551264E-04  | -2.661046E-05 |
| 17   | O1    | 9.299827E-06  | -2.350596E-04 | 1.083959E-04  |
| 18   | C23   | 2.499740E-05  | -2.396197E-05 | 4.156761E-07  |
| 19   | C18   | -1.417986E-04 | 4.402736E-05  | -4.853944E-05 |
| 20   | C19   | -9.254293E-05 | 8.478585E-05  | 1.110945E-05  |
| 21   | C20   | -6.511603E-05 | -2.494568E-04 | -3.471868E-04 |
| 22   | C21   | -1.184292E-04 | -3.648033E-05 | -2.291644E-04 |
| 23   | C22   | 6.673478E-05  | 1.812937E-05  | 3.627456E-05  |
| 24   | H2    | 1.674945E-04  | 1.144597E-04  | 1.803355E-04  |
| 25   | H5    | -3.632956E-05 | 3.075275E-04  | 1.983242E-04  |
| 26   | H7    | 4.576618E-05  | 7.346262E-05  | 1.096941E-05  |
| 27   | H8    | -1.239831E-05 | 8.456940E-05  | 1.749936E-04  |
| 28   | H9    | -3.424412E-05 | 5.980291E-05  | 1.512730E-05  |
| 29   | H10   | 3.923015E-05  | 6.234296E-05  | 2.264811E-05  |
| 30   | H19   | -1.023405E-04 | 8.702372E-05  | 1.992197E-06  |
| 31   | H20   | -4.233409E-05 | 1.858463E-05  | 1.620934E-05  |
| 32   | H21   | 2.920042E-05  | 6.727809E-05  | -9.444831E-05 |
| 33   | H22   | -4.511039E-05 | 4.599512E-05  | -4.536785E-06 |

|       |       |               |               |               |
|-------|-------|---------------|---------------|---------------|
| 34    | H11   | -1.626549E-04 | -2.943504E-05 | -1.333052E-05 |
| 35    | H12   | -1.248121E-05 | -1.386197E-04 | 5.964935E-05  |
| 36    | H13   | 5.956919E-05  | -1.651496E-05 | 2.440085E-05  |
| ----- |       |               |               |               |
|       | total | -7.405110E-04 | 1.107088E-03  | -2.897448E-04 |

end of program der1b

start of program geopt 33

geometry optimization step 33

reading input hessian of dimension 108  
in five columns format  
reading input hessian of dimension 108  
in five columns format

Level shifts adjusted to satisfy step-size constraints

Step size: 0.0101401

Cos(theta): 0.7026930

Final level shift: -5.8161064E-02

energy change: -1.2474E-05 \* ( 5.0000E-05 )  
gradient maximum: 7.8846E-04 . ( 4.5000E-04 )  
gradient rms: 1.5754E-04 \* ( 3.0000E-04 )  
step size: 0.01014 trust radius: 0.01000  
displacement maximum: 5.9000E-03 . ( 1.8000E-03 )  
displacement rms: 9.1804E-04 \* ( 1.2000E-03 )  
predicted energy change: -9.1894E-06 geom step: 1.0140E-  
02 full step: 1.0140E-02  
molecular structure not yet converged...

center of mass moved by:

x: 1.2317E-04 y: -3.6068E-04 z: -2.5327E-05

new geometry:

|      | angstroms     |               |               |
|------|---------------|---------------|---------------|
| atom | x             | y             | z             |
| H1   | -1.1782436348 | 1.8884882357  | -2.2323451060 |
| C1   | -1.0966500432 | 2.1210246722  | -1.1841919981 |
| C2   | -0.8833985818 | 2.6953330377  | 1.5038908766  |
| C3   | -0.8782725170 | 1.0869161483  | -0.2891731885 |
| C4   | -1.2015822621 | 3.4354136967  | -0.7600677729 |
| C5   | -1.0954496818 | 3.7144926986  | 0.5900740946  |
| C6   | -0.7673723725 | 1.3775358407  | 1.0726829682  |
| C7   | -0.7867648375 | -0.3526417995 | -0.7565128990 |
| H3   | -1.3664168462 | 4.2241025129  | -1.4717616368 |
| H4   | -1.1816014236 | 4.7268303196  | 0.9435337953  |
| H6   | -0.8155656469 | 2.9335369067  | 2.5474673153  |
| C16  | 0.6129601417  | -0.7649483663 | -1.2104665821 |

|     |               |               |               |
|-----|---------------|---------------|---------------|
| C8  | -1.3978387992 | -1.2501478148 | 0.3424335223  |
| N2  | -0.5105536317 | 0.3377070809  | 1.9934269523  |
| C9  | -0.7825034468 | -0.9774951662 | 1.7049486950  |
| C10 | 0.0060102065  | 0.6537136930  | 3.3173250847  |
| O1  | -0.5818155849 | -1.8521104528 | 2.4999057257  |
| C23 | -1.3878093466 | -2.7418447005 | 0.0230860991  |
| C18 | 3.1409599414  | -1.5829895059 | -2.0947304617 |
| C19 | 0.7608897374  | -1.4866144105 | -2.3897620254 |
| C20 | 1.7593665998  | -0.4490145621 | -0.4858643151 |
| C21 | 3.0088992520  | -0.8569262627 | -0.9212972010 |
| C22 | 2.0107732232  | -1.8945373784 | -2.8302508381 |
| H2  | -0.1095125604 | -1.7349784475 | -2.9723552145 |
| H5  | 1.6836957767  | 0.1261551039  | 0.4185682141  |
| H7  | 3.8809000983  | -0.6032399005 | -0.3439281192 |
| H8  | 2.0979783144  | -2.4523120306 | -3.7460499885 |
| H9  | 4.1131193410  | -1.8967451165 | -2.4321396604 |
| H10 | -1.4329299787 | -0.4533019576 | -1.6221184022 |
| H19 | -0.3781689111 | -3.1285779634 | -0.0242926741 |
| H20 | -1.8692492418 | -2.9196334061 | -0.9340145266 |
| H21 | -1.9201847187 | -3.2937593144 | 0.7856760704  |
| H22 | -2.4349850328 | -0.9262141476 | 0.4403125226  |
| H11 | 0.8084925096  | 1.3759796254  | 3.2334841207  |
| H12 | 0.3806322747  | -0.2541246848 | 3.7579995218  |
| H13 | -0.7685989033 | 1.0591796755  | 3.9608380596  |

nuclear repulsion energy..... 1414.898954119 hartrees

-----  
 / end of geometry optimization iteration 33 /  
 -----

end of program geopt

start of program onee  
 smallest eigenvalue of S: 3.335E-04  
 number of canonical orbitals..... 368  
 end of program onee

start of program probe  
 end of program probe

start of program grid

number of gridpoints:

| atom     | H1  | C1 | C2 | C3 | C4 | C5 | C6 |
|----------|-----|----|----|----|----|----|----|
| C7       |     |    |    |    |    |    |    |
| grid # 1 | 72  | 87 | 89 | 89 | 89 | 88 | 83 |
| 81       |     |    |    |    |    |    |    |
| grid # 2 | 116 | 97 | 96 | 98 | 97 | 97 | 95 |
| 90       |     |    |    |    |    |    |    |

|          |     |     |     |     |     |     |     |
|----------|-----|-----|-----|-----|-----|-----|-----|
| grid # 3 | 217 | 182 | 184 | 194 | 183 | 184 | 189 |
| 177      |     |     |     |     |     |     |     |
| grid # 4 | 216 | 326 | 328 | 338 | 328 | 328 | 326 |
| 314      |     |     |     |     |     |     |     |

number of gridpoints:

|          |     |     |     |     |     |     |     |
|----------|-----|-----|-----|-----|-----|-----|-----|
| atom     | H3  | H4  | H6  | C16 | C8  | N2  | C9  |
| C10      |     |     |     |     |     |     |     |
| grid # 1 | 73  | 73  | 70  | 92  | 82  | 95  | 82  |
| 70       |     |     |     |     |     |     |     |
| grid # 2 | 118 | 118 | 112 | 100 | 90  | 105 | 92  |
| 80       |     |     |     |     |     |     |     |
| grid # 3 | 223 | 223 | 207 | 194 | 174 | 211 | 176 |
| 143      |     |     |     |     |     |     |     |
| grid # 4 | 224 | 223 | 208 | 342 | 311 | 387 | 293 |
| 272      |     |     |     |     |     |     |     |

number of gridpoints:

|          |     |     |     |     |     |     |     |
|----------|-----|-----|-----|-----|-----|-----|-----|
| atom     | O1  | C23 | C18 | C19 | C20 | C21 | C22 |
| H2       |     |     |     |     |     |     |     |
| grid # 1 | 111 | 74  | 89  | 88  | 88  | 89  | 89  |
| 71       |     |     |     |     |     |     |     |
| grid # 2 | 123 | 79  | 97  | 95  | 96  | 97  | 96  |
| 112      |     |     |     |     |     |     |     |
| grid # 3 | 257 | 149 | 183 | 183 | 182 | 184 | 183 |
| 212      |     |     |     |     |     |     |     |
| grid # 4 | 450 | 287 | 327 | 326 | 327 | 327 | 327 |
| 211      |     |     |     |     |     |     |     |

number of gridpoints:

|          |     |     |     |     |     |     |     |
|----------|-----|-----|-----|-----|-----|-----|-----|
| atom     | H5  | H7  | H8  | H9  | H10 | H19 | H20 |
| H21      |     |     |     |     |     |     |     |
| grid # 1 | 71  | 73  | 73  | 73  | 66  | 71  | 71  |
| 70       |     |     |     |     |     |     |     |
| grid # 2 | 111 | 118 | 118 | 118 | 106 | 108 | 110 |
| 108      |     |     |     |     |     |     |     |
| grid # 3 | 212 | 223 | 223 | 224 | 203 | 218 | 217 |
| 217      |     |     |     |     |     |     |     |
| grid # 4 | 207 | 223 | 224 | 224 | 196 | 212 | 216 |
| 215      |     |     |     |     |     |     |     |

number of gridpoints:

|          |     |     |     |     |       |
|----------|-----|-----|-----|-----|-------|
| atom     | H22 | H11 | H12 | H13 | total |
| grid # 1 | 69  | 71  | 70  | 71  | 2863  |
| grid # 2 | 110 | 109 | 107 | 111 | 3730  |
| grid # 3 | 214 | 214 | 212 | 217 | 7188  |
| grid # 4 | 211 | 211 | 209 | 218 | 9912  |

end of program grid

start of program rwr



end of program rwr

start of program scf

|      | i | u | d | i | g |                  | RMS     | maximum |
|------|---|---|---|---|---|------------------|---------|---------|
|      | t | p | i | c | r |                  | energy  | DIIS    |
|      | e | d | i | u | i | total energy     | density | error   |
|      | r | t | s | t | d |                  | change  |         |
| etot | 1 | N | N | 1 | U | -783.03313364975 | 2.4E-05 | 1.3E-03 |
| etot | 2 | Y | Y | 4 | M | -783.03323204023 | 9.8E-05 | 5.3E-04 |
| etot | 3 | Y | Y | 4 | M | -783.03324395883 | 1.2E-05 | 1.3E-04 |
| etot | 4 | Y | N | 4 | M | -783.03324822713 | 4.3E-06 | 0.0E+00 |

Energy components, in hartrees:

|     |                               |                   |       |
|-----|-------------------------------|-------------------|-------|
| (A) | Nuclear repulsion.....        | 1414.89895411906  |       |
| (E) | Total one-electron terms..... | -3874.36278585393 |       |
| (I) | Total two-electron terms..... | 1676.43058350774  |       |
| (L) | Electronic energy.....        | -2197.93220234619 | (E+I) |
| (N) | Total energy.....             | -783.03324822713  | (A+L) |

SCFE: SCF energy: HF -783.03324822713 hartrees iterations:  
4

HOMO energy: -0.30209  
LUMO energy: 0.12928

Orbital energies:

|           |           |           |           |           |           |
|-----------|-----------|-----------|-----------|-----------|-----------|
| -20.52665 | -15.60059 | -11.34619 | -11.28620 | -11.25659 | -11.25008 |
| -11.24314 | -11.24173 | -11.24053 | -11.23854 | -11.23794 | -11.23493 |
| -11.23119 | -11.23054 | -11.22999 | -11.22952 | -11.22850 | -11.22780 |
| -11.20907 | -1.39733  | -1.26971  | -1.16517  | -1.14902  | -1.10608  |
| -1.03012  | -1.01870  | -1.01795  | -1.01270  | -0.96258  | -0.93279  |
| -0.85823  | -0.83901  | -0.83337  | -0.82171  | -0.79613  | -0.74121  |
| -0.71101  | -0.69502  | -0.67288  | -0.66435  | -0.64466  | -0.63757  |
| -0.62743  | -0.61492  | -0.61226  | -0.60861  | -0.59695  | -0.58330  |
| -0.57638  | -0.55343  | -0.54884  | -0.54069  | -0.53099  | -0.51904  |
| -0.51483  | -0.50724  | -0.50110  | -0.49778  | -0.48458  | -0.46869  |
| -0.46290  | -0.42165  | -0.41156  | -0.34266  | -0.33292  | -0.32296  |
| -0.30209  | 0.12928   | 0.13405   | 0.14444   | 0.15224   | 0.20385   |
| 0.22974   | 0.24097   | 0.24890   | 0.26128   | 0.28805   |           |

end of program scf

start of program derla  
end of program derla

start of program rwr  
end of program rwr

start of program der1b

forces (hartrees/bohr) : total

| atom  | label | x             | y             | z             |
|-------|-------|---------------|---------------|---------------|
| 1     | H1    | -2.495729E-05 | 4.796164E-05  | -5.539829E-05 |
| 2     | C1    | -1.014348E-05 | -2.750341E-05 | 6.739713E-05  |
| 3     | C2    | -2.822060E-05 | -9.738500E-05 | -4.018127E-05 |
| 4     | C3    | 2.284691E-05  | 5.932017E-05  | 1.836120E-04  |
| 5     | C4    | -2.300864E-05 | -2.274707E-05 | -6.442334E-05 |
| 6     | C5    | -1.142390E-05 | 1.248055E-05  | 6.632482E-06  |
| 7     | C6    | -5.277570E-05 | 7.152988E-05  | -2.027990E-04 |
| 8     | C7    | 4.883983E-05  | 1.062756E-04  | 4.918108E-05  |
| 9     | H3    | -4.437550E-05 | 1.003283E-04  | -7.334871E-05 |
| 10    | H4    | -3.570224E-05 | 9.976299E-05  | -5.694263E-06 |
| 11    | H6    | -1.690824E-05 | 3.067899E-05  | 4.265910E-05  |
| 12    | C16   | -3.563945E-05 | 3.068864E-04  | 9.686457E-05  |
| 13    | C8    | -1.493483E-04 | -3.820148E-05 | -4.727248E-05 |
| 14    | N2    | -1.044950E-05 | -3.484935E-04 | 2.902911E-04  |
| 15    | C9    | -1.096265E-05 | 3.648476E-05  | -1.533171E-04 |
| 16    | C10   | -2.809214E-05 | -2.069314E-04 | 8.277370E-05  |
| 17    | O1    | -4.188463E-05 | 3.388775E-04  | -1.083106E-04 |
| 18    | C23   | -5.089082E-05 | 7.553558E-05  | -3.408758E-05 |
| 19    | C18   | 1.384814E-04  | 1.063206E-05  | 2.476322E-05  |
| 20    | C19   | 5.471999E-05  | -3.752327E-05 | -5.097231E-05 |
| 21    | C20   | 2.837294E-05  | 3.360736E-04  | 3.790007E-04  |
| 22    | C21   | 9.445389E-05  | 1.225381E-04  | 2.480095E-04  |
| 23    | C22   | -1.371408E-04 | 3.722128E-05  | -6.151656E-05 |
| 24    | H2    | -2.254244E-04 | -5.388627E-05 | -2.202388E-04 |
| 25    | H5    | -1.008995E-06 | -2.594671E-04 | -2.257091E-04 |
| 26    | H7    | -8.115341E-05 | -2.347967E-05 | -1.168593E-05 |
| 27    | H8    | -2.847789E-05 | -4.385286E-05 | -2.322022E-04 |
| 28    | H9    | -7.358682E-06 | -4.126945E-06 | -3.475342E-05 |
| 29    | H10   | -7.459626E-05 | -4.219164E-06 | -4.324826E-05 |
| 30    | H19   | 3.494792E-05  | -2.003829E-05 | -7.533938E-06 |
| 31    | H20   | -5.706744E-06 | 3.578239E-05  | -3.419139E-05 |
| 32    | H21   | -7.072750E-05 | -8.283587E-06 | 6.494118E-05  |
| 33    | H22   | -5.694953E-06 | 6.106126E-06  | -1.154229E-05 |
| 34    | H11   | 7.608723E-05  | 1.312416E-04  | 4.626715E-06  |
| 35    | H12   | -1.280180E-05 | 2.116719E-04  | -7.210344E-05 |
| 36    | H13   | -3.308102E-05 | 5.136898E-05  | -3.433403E-05 |
| total |       | -7.592054E-04 | 1.032619E-03  | -2.841118E-04 |

end of program der1b

start of program geopt 34

geometry optimization step 34

reading input hessian of dimension 108  
in five columns format  
reading input hessian of dimension 108  
in five columns format

Level shifts adjusted to satisfy step-size constraints

Step size: 0.0102892  
Cos(theta): 0.7360524

Final level shift: -6.9004093E-02

energy change: 1.2841E-05 \* ( 5.0000E-05 )  
gradient maximum: 8.4139E-04 . ( 4.5000E-04 )  
gradient rms: 1.6553E-04 \* ( 3.0000E-04 )  
step size: 0.01029 trust radius: 0.01000  
displacement maximum: 5.8536E-03 . ( 1.8000E-03 )  
displacement rms: 9.3154E-04 \* ( 1.2000E-03 )  
predicted energy change: -1.0576E-05 geom step: 1.0289E-  
02 full step: 1.0289E-02  
molecular structure not yet converged...

center of mass moved by:

x: -1.4661E-04 y: 4.2068E-04 z: 2.7475E-05

new geometry:

|      | angstroms     |               |               |
|------|---------------|---------------|---------------|
| atom | x             | y             | z             |
| H1   | -1.1805614724 | 1.8873312194  | -2.2325590772 |
| C1   | -1.0988678230 | 2.1203754895  | -1.1844499827 |
| C2   | -0.8851972573 | 2.6958179147  | 1.5030850454  |
| C3   | -0.8789621666 | 1.0869655809  | -0.2889858675 |
| C4   | -1.2051956092 | 3.4348036456  | -0.7611187766 |
| C5   | -1.0987990691 | 3.7144821370  | 0.5889396779  |
| C6   | -0.7679575738 | 1.3780267725  | 1.0724270332  |
| C7   | -0.7864899045 | -0.3523534833 | -0.7563566201 |
| H3   | -1.3713798781 | 4.2230655574  | -1.4732268474 |
| H4   | -1.1860979322 | 4.7269955359  | 0.9419277801  |
| H6   | -0.8171292512 | 2.9343469533  | 2.5466757310  |
| C16  | 0.6132500135  | -0.7637463060 | -1.2108040406 |
| C8   | -1.3969960689 | -1.2503528553 | 0.3426095063  |
| N2   | -0.5095650235 | 0.3385205610  | 1.9935740541  |
| C9   | -0.7810175831 | -0.9764387523 | 1.7047405066  |
| C10  | 0.0089396651  | 0.6565354898  | 3.3161259514  |
| O1   | -0.5791703716 | -1.8499870432 | 2.5001677177  |
| C23  | -1.3853410052 | -2.7421129071 | 0.0240518728  |
| C18  | 3.1404515581  | -1.5858894563 | -2.0936464290 |
| C19  | 0.7612228580  | -1.4795130802 | -2.3943323359 |
| C20  | 1.7590525571  | -0.4567842023 | -0.4807317457 |

S447

|     |               |               |               |
|-----|---------------|---------------|---------------|
| C21 | 3.0082515555  | -0.8669505366 | -0.9154375403 |
| C22 | 2.0108416635  | -1.8887176892 | -2.8344753259 |
| H2  | -0.1090067848 | -1.7227052760 | -2.9806890284 |
| H5  | 1.6828091068  | 0.1096766451  | 0.4281689213  |
| H7  | 3.8794507410  | -0.6210694384 | -0.3338905403 |
| H8  | 2.0982411052  | -2.4410615463 | -3.7541220756 |
| H9  | 4.1121371960  | -1.9015237343 | -2.4307372788 |
| H10 | -1.4331651322 | -0.4537161157 | -1.6216716808 |
| H19 | -0.3752573750 | -3.1285094964 | -0.0212229022 |
| H20 | -1.8645467793 | -2.9204454136 | -0.9340776715 |
| H21 | -1.9189925001 | -3.2940347299 | 0.7860361960  |
| H22 | -2.4343022302 | -0.9273733424 | 0.4406108339  |
| H11 | 0.8103358295  | 1.3803317714  | 3.2300391455  |
| H12 | 0.3864269001  | -0.2494532846 | 3.7569848015  |
| H13 | -0.7654095882 | 1.0617010943  | 3.9601786322  |

nuclear repulsion energy..... 1414.901290286 hartrees

-----  
/ end of geometry optimization iteration 34 /  
-----

end of program geopt

start of program onee  
smallest eigenvalue of S: 3.333E-04  
number of canonical orbitals..... 368  
end of program onee

start of program probe  
end of program probe

start of program grid

number of gridpoints:

| atom     | H1  | C1  | C2  | C3  | C4  | C5  | C6  |
|----------|-----|-----|-----|-----|-----|-----|-----|
| C7       |     |     |     |     |     |     |     |
| grid # 1 | 72  | 87  | 89  | 90  | 89  | 88  | 84  |
| 81       |     |     |     |     |     |     |     |
| grid # 2 | 116 | 97  | 96  | 98  | 97  | 97  | 94  |
| 90       |     |     |     |     |     |     |     |
| grid # 3 | 217 | 182 | 184 | 194 | 183 | 184 | 189 |
| 177      |     |     |     |     |     |     |     |
| grid # 4 | 216 | 326 | 328 | 338 | 328 | 328 | 323 |
| 314      |     |     |     |     |     |     |     |

number of gridpoints:

| atom | H3 | H4 | H6 | C16 | C8 | N2 | C9 |
|------|----|----|----|-----|----|----|----|
| C10  |    |    |    |     |    |    |    |

|     |          |     |     |     |     |     |     |     |
|-----|----------|-----|-----|-----|-----|-----|-----|-----|
| 69  | grid # 1 | 73  | 73  | 70  | 92  | 82  | 95  | 82  |
| 78  | grid # 2 | 118 | 118 | 112 | 100 | 90  | 105 | 92  |
| 147 | grid # 3 | 223 | 223 | 207 | 194 | 174 | 211 | 176 |
| 275 | grid # 4 | 224 | 223 | 208 | 342 | 311 | 387 | 293 |

number of gridpoints:

|     |          |     |     |     |     |     |     |     |
|-----|----------|-----|-----|-----|-----|-----|-----|-----|
| H2  | atom     | O1  | C23 | C18 | C19 | C20 | C21 | C22 |
| 71  | grid # 1 | 111 | 74  | 89  | 88  | 88  | 89  | 89  |
| 112 | grid # 2 | 123 | 80  | 97  | 95  | 96  | 97  | 96  |
| 212 | grid # 3 | 257 | 150 | 183 | 183 | 182 | 184 | 183 |
| 211 | grid # 4 | 450 | 285 | 327 | 326 | 327 | 327 | 327 |

number of gridpoints:

|     |          |     |     |     |     |     |     |     |
|-----|----------|-----|-----|-----|-----|-----|-----|-----|
| H21 | atom     | H5  | H7  | H8  | H9  | H10 | H19 | H20 |
| 70  | grid # 1 | 71  | 73  | 73  | 73  | 67  | 71  | 71  |
| 108 | grid # 2 | 111 | 118 | 118 | 118 | 106 | 108 | 110 |
| 217 | grid # 3 | 212 | 223 | 223 | 224 | 202 | 218 | 216 |
| 215 | grid # 4 | 207 | 223 | 224 | 224 | 197 | 212 | 216 |

number of gridpoints:

|  |          |     |     |     |     |       |
|--|----------|-----|-----|-----|-----|-------|
|  | atom     | H22 | H11 | H12 | H13 | total |
|  | grid # 1 | 69  | 71  | 70  | 71  | 2865  |
|  | grid # 2 | 110 | 109 | 107 | 111 | 3728  |
|  | grid # 3 | 214 | 213 | 212 | 217 | 7190  |
|  | grid # 4 | 211 | 211 | 209 | 218 | 9911  |

end of program grid

start of program rwr  
end of program rwr

start of program scf

|   |   |   |   |   |        |                             |
|---|---|---|---|---|--------|-----------------------------|
| i | u | d | i | g |        |                             |
| t | p | i | c | r |        |                             |
| e | d | i | u | i | energy | RMS maximum<br>density DIIS |

|      | r | t | s | t | d | total energy     | change   | change  | error   |
|------|---|---|---|---|---|------------------|----------|---------|---------|
| etot | 1 | N | N | 1 | U | -783.03313917140 |          | 2.4E-05 | 1.3E-03 |
| etot | 2 | Y | Y | 4 | M | -783.03324190096 | 1.0E-04  | 1.2E-05 | 5.2E-04 |
| etot | 3 | Y | Y | 4 | M | -783.03325938365 | 1.7E-05  | 3.7E-06 | 1.3E-04 |
| etot | 4 | Y | N | 4 | M | -783.03325752465 | -1.9E-06 | 0.0E+00 | 0.0E+00 |

Energy components, in hartrees:

|     |                               |                   |       |
|-----|-------------------------------|-------------------|-------|
| (A) | Nuclear repulsion.....        | 1414.90129028610  |       |
| (E) | Total one-electron terms..... | -3874.37617085487 |       |
| (I) | Total two-electron terms..... | 1676.44162304412  |       |
| (L) | Electronic energy.....        | -2197.93454781075 | (E+I) |
| (N) | Total energy.....             | -783.03325752465  | (A+L) |

SCFE: SCF energy: HF -783.03325752465 hartrees iterations:  
4

HOMO energy: -0.30202  
LUMO energy: 0.12927

Orbital energies:

|           |           |           |           |           |           |
|-----------|-----------|-----------|-----------|-----------|-----------|
| -20.52693 | -15.60011 | -11.34581 | -11.28575 | -11.25659 | -11.24981 |
| -11.24297 | -11.24133 | -11.24051 | -11.23871 | -11.23789 | -11.23492 |
| -11.23148 | -11.23061 | -11.23015 | -11.22982 | -11.22869 | -11.22759 |
| -11.20917 | -1.39748  | -1.26945  | -1.16499  | -1.14892  | -1.10596  |
| -1.03001  | -1.01861  | -1.01779  | -1.01270  | -0.96255  | -0.93266  |
| -0.85808  | -0.83890  | -0.83325  | -0.82165  | -0.79604  | -0.74108  |
| -0.71094  | -0.69497  | -0.67282  | -0.66427  | -0.64457  | -0.63753  |
| -0.62742  | -0.61486  | -0.61224  | -0.60848  | -0.59693  | -0.58335  |
| -0.57625  | -0.55335  | -0.54872  | -0.54064  | -0.53100  | -0.51903  |
| -0.51488  | -0.50717  | -0.50097  | -0.49774  | -0.48457  | -0.46861  |
| -0.46284  | -0.42150  | -0.41150  | -0.34254  | -0.33295  | -0.32283  |
| -0.30202  | 0.12927   | 0.13402   | 0.14451   | 0.15236   | 0.20399   |
| 0.22969   | 0.24104   | 0.24882   | 0.26136   | 0.28824   |           |

end of program scf

start of program derla  
end of program derla

start of program rwr  
end of program rwr

start of program derlb

forces (hartrees/bohr) : total

| atom  | label | x             | y             | z             |
|-------|-------|---------------|---------------|---------------|
| 1     | H1    | -1.423554E-05 | 1.608411E-05  | 3.525702E-05  |
| 2     | C1    | -3.217379E-05 | 9.999231E-05  | -8.585930E-05 |
| 3     | C2    | -6.165249E-05 | 1.450516E-04  | 2.379150E-05  |
| 4     | C3    | -3.232398E-05 | 3.252565E-06  | -2.059562E-04 |
| 5     | C4    | -1.982986E-05 | 7.757018E-05  | 4.177575E-05  |
| 6     | C5    | -2.401762E-05 | 5.121752E-05  | -1.632526E-05 |
| 7     | C6    | 6.934168E-05  | 2.547957E-05  | 1.511136E-04  |
| 8     | C7    | -1.193000E-04 | -5.585110E-05 | -6.139549E-05 |
| 9     | H3    | 4.042694E-06  | -3.701933E-05 | 5.560441E-05  |
| 10    | H4    | -4.406349E-06 | -4.012031E-05 | -1.180135E-05 |
| 11    | H6    | -3.448831E-05 | 3.362757E-05  | -6.180295E-05 |
| 12    | C16   | -2.270240E-05 | -2.428404E-04 | -8.249696E-05 |
| 13    | C8    | 1.456418E-04  | 1.015977E-04  | 2.288894E-05  |
| 14    | N2    | -7.562233E-05 | 4.337052E-04  | -3.136797E-04 |
| 15    | C9    | -8.327761E-05 | 3.870506E-05  | 1.393446E-04  |
| 16    | C10   | 1.436637E-05  | 1.806140E-04  | -3.739062E-05 |
| 17    | O1    | 3.615547E-06  | -2.895078E-04 | 1.321108E-04  |
| 18    | C23   | 1.483506E-05  | -8.612687E-06 | -6.678258E-06 |
| 19    | C18   | -1.435223E-04 | 4.785366E-05  | -4.370909E-05 |
| 20    | C19   | -1.185819E-04 | 9.742135E-05  | 2.455594E-05  |
| 21    | C20   | -8.599774E-05 | -2.620429E-04 | -3.687782E-04 |
| 22    | C21   | -1.261466E-04 | -4.977726E-05 | -2.511777E-04 |
| 23    | C22   | 9.045403E-05  | 1.023138E-05  | 3.016389E-05  |
| 24    | H2    | 1.739613E-04  | 1.186778E-04  | 1.882769E-04  |
| 25    | H5    | -3.505052E-05 | 3.124855E-04  | 2.015493E-04  |
| 26    | H7    | 5.350544E-05  | 7.676913E-05  | 1.114692E-05  |
| 27    | H8    | -1.161231E-05 | 9.171525E-05  | 1.897417E-04  |
| 28    | H9    | -2.986114E-05 | 6.232830E-05  | 1.648711E-05  |
| 29    | H10   | 3.785039E-05  | 6.312826E-05  | 1.889092E-05  |
| 30    | H19   | -7.055307E-05 | 7.036212E-05  | -3.577840E-06 |
| 31    | H20   | -3.775849E-05 | 2.428104E-05  | 1.359077E-05  |
| 32    | H21   | 1.569277E-05  | 5.702694E-05  | -7.263156E-05 |
| 33    | H22   | -5.728326E-05 | 5.400058E-05  | -3.263135E-06 |
| 34    | H11   | -1.653324E-04 | -4.557818E-05 | -2.252669E-05 |
| 35    | H12   | -8.525505E-06 | -1.416127E-04 | 5.653734E-05  |
| 36    | H13   | 4.831769E-05  | -1.993947E-05 | 3.455181E-06  |
| total |       | -7.426307E-04 | 1.100277E-03  | -2.927675E-04 |

end of program derlb

start of program geopt 35

geometry optimization step 35

reading input hessian of dimension 108

in five columns format

reading input hessian of dimension 108

in five columns format

Level shifts adjusted to satisfy step-size constraints

Step size: 0.0101577

Cos(theta): 0.7096922

Final level shift: -5.9936046E-02

energy change: -9.2975E-06 \* ( 5.0000E-05 )

gradient maximum: 8.2905E-04 . ( 4.5000E-04 )

gradient rms: 1.6182E-04 \* ( 3.0000E-04 )

step size: 0.01016 trust radius: 0.01000

displacement maximum: 5.8998E-03 . ( 1.8000E-03 )

displacement rms: 9.1963E-04 \* ( 1.2000E-03 )

predicted energy change: -9.5346E-06 geom step: 1.0158E-

02 full step: 1.0158E-02

molecular structure not yet converged...

center of mass moved by:

x: 4.0183E-05 y: -4.0817E-04 z: 1.8648E-05

new geometry:

|      | angstroms     |               |               |
|------|---------------|---------------|---------------|
| atom | x             | y             | z             |
| H1   | -1.1780959865 | 1.8886365093  | -2.2324111974 |
| C1   | -1.0965950393 | 2.1211242707  | -1.1842400163 |
| C2   | -0.8836885591 | 2.6953109023  | 1.5039080142  |
| C3   | -0.8781839324 | 1.0870015221  | -0.2892482658 |
| C4   | -1.2016859866 | 3.4354723985  | -0.7600460694 |
| C5   | -1.0957554189 | 3.7144938471  | 0.5901273141  |
| C6   | -0.7673801867 | 1.3775867398  | 1.0726182992  |
| C7   | -0.7866773992 | -0.3525701990 | -0.7565731427 |
| H3   | -1.3665230583 | 4.2241851175  | -1.4717097388 |
| H4   | -1.1820986030 | 4.7267978301  | 0.9436287835  |
| H6   | -0.8160648773 | 2.9334204885  | 2.5475241315  |
| C16  | 0.6130617601  | -0.7649693713 | -1.2103997393 |
| C8   | -1.3979711936 | -1.2500205454 | 0.3423146603  |
| N2   | -0.5104319673 | 0.3377301161  | 1.9933135921  |
| C9   | -0.7827553530 | -0.9774387468 | 1.7049035016  |
| C10  | 0.0067763016  | 0.6535819869  | 3.3169727326  |
| O1   | -0.5823909012 | -1.8520607931 | 2.4999656520  |
| C23  | -1.3879911048 | -2.7417379021 | 0.0230017899  |
| C18  | 3.1411107946  | -1.5831482088 | -2.0945005210 |
| C19  | 0.7610313221  | -1.4867078101 | -2.3896467211 |
| C20  | 1.7594414390  | -0.4490513000 | -0.4857668967 |
| C21  | 3.0089951627  | -0.8570189449 | -0.9211192787 |
| C22  | 2.0109392888  | -1.8947119032 | -2.8300487298 |
| H2   | -0.1093420184 | -1.7350290935 | -2.9722896895 |
| H5   | 1.6837650844  | 0.1261972588  | 0.4186167921  |
| H7   | 3.8809853315  | -0.6033099777 | -0.3437180405 |
| H8   | 2.0981725490  | -2.4525322364 | -3.7458102377 |
| H9   | 4.1132900762  | -1.8969284241 | -2.4318394277 |
| H10  | -1.4327532368 | -0.4531878102 | -1.6222577299 |



|     |               |               |               |
|-----|---------------|---------------|---------------|
| H19 | -0.3783594796 | -3.1286260004 | -0.0240270515 |
| H20 | -1.8691110612 | -2.9194765820 | -0.9342678011 |
| H21 | -1.9207117695 | -3.2935724368 | 0.7854473765  |
| H22 | -2.4351208906 | -0.9259980847 | 0.4400534515  |
| H11 | 0.8084419856  | 1.3766802522  | 3.2327871194  |
| H12 | 0.3826692380  | -0.2540764040 | 3.7569549745  |
| H13 | -0.7677554457 | 1.0579670118  | 3.9612344789  |

nuclear repulsion energy..... 1414.895433378 hartrees

-----  
 / end of geometry optimization iteration 35 /  
 -----

end of program geopt

start of program onee  
 smallest eigenvalue of S: 3.335E-04  
 number of canonical orbitals..... 368  
 end of program onee

start of program probe  
 end of program probe

start of program grid

number of gridpoints:

| atom     | H1  | C1  | C2  | C3  | C4  | C5  | C6  |
|----------|-----|-----|-----|-----|-----|-----|-----|
| C7       |     |     |     |     |     |     |     |
| grid # 1 | 72  | 87  | 89  | 89  | 89  | 88  | 83  |
| 81       |     |     |     |     |     |     |     |
| grid # 2 | 116 | 97  | 96  | 98  | 97  | 97  | 95  |
| 90       |     |     |     |     |     |     |     |
| grid # 3 | 217 | 182 | 184 | 194 | 183 | 184 | 189 |
| 177      |     |     |     |     |     |     |     |
| grid # 4 | 216 | 326 | 328 | 338 | 328 | 328 | 326 |
| 314      |     |     |     |     |     |     |     |

number of gridpoints:

| atom     | H3  | H4  | H6  | C16 | C8  | N2  | C9  |
|----------|-----|-----|-----|-----|-----|-----|-----|
| C10      |     |     |     |     |     |     |     |
| grid # 1 | 73  | 73  | 70  | 92  | 82  | 95  | 82  |
| 70       |     |     |     |     |     |     |     |
| grid # 2 | 118 | 118 | 112 | 100 | 90  | 105 | 92  |
| 80       |     |     |     |     |     |     |     |
| grid # 3 | 223 | 223 | 207 | 194 | 174 | 211 | 176 |
| 143      |     |     |     |     |     |     |     |
| grid # 4 | 224 | 223 | 208 | 342 | 311 | 387 | 293 |
| 272      |     |     |     |     |     |     |     |

```

number of gridpoints:
  atom      01      C23      C18      C19      C20      C21      C22
H2
  grid # 1      111      74      89      88      88      89      89
71
  grid # 2      123      79      97      95      96      97      96
112
  grid # 3      257      149      183      183      182      184      183
212
  grid # 4      450      287      327      326      327      327      327
211

```

```

number of gridpoints:
  atom      H5      H7      H8      H9      H10      H19      H20
H21
  grid # 1      71      73      73      73      66      71      71
70
  grid # 2      111      118      118      118      106      108      110
108
  grid # 3      212      223      223      224      203      218      217
217
  grid # 4      207      223      224      224      196      212      216
215

```

```

number of gridpoints:
  atom      H22      H11      H12      H13      total
grid # 1      69      71      70      71      2863
grid # 2      110      109      107      111      3730
grid # 3      214      213      212      217      7187
grid # 4      211      211      209      218      9912

```

end of program grid

start of program rwr  
end of program rwr

start of program scf

|      | i | u | d | i | g |                  | energy  | RMS     | maximum |
|------|---|---|---|---|---|------------------|---------|---------|---------|
|      | t | p | i | c | r |                  | change  | density | DIIS    |
|      | e | d | i | u | i | total energy     |         | change  | error   |
|      | r | t | s | t | d |                  |         |         |         |
| etot | 1 | N | N | 1 | U | -783.03312817429 |         | 2.5E-05 | 1.3E-03 |
| etot | 2 | Y | Y | 4 | M | -783.03322983626 | 1.0E-04 | 1.2E-05 | 5.3E-04 |
| etot | 3 | Y | Y | 4 | M | -783.03324267598 | 1.3E-05 | 3.7E-06 | 1.3E-04 |
| etot | 4 | Y | N | 4 | M | -783.03324656249 | 3.9E-06 | 0.0E+00 | 0.0E+00 |

Energy components, in hartrees:

(A) Nuclear repulsion..... 1414.89543337819  
 (E) Total one-electron terms..... -3874.35563247521  
 (I) Total two-electron terms..... 1676.42695253453  
 (L) Electronic energy..... -2197.92867994068 (E+I)  
 (N) Total energy..... -783.03324656249 (A+L)

SCFE: SCF energy: HF -783.03324656249 hartrees iterations:  
 4

HOMO energy: -0.30209  
 LUMO energy: 0.12928

Orbital energies:

|           |           |           |           |           |           |
|-----------|-----------|-----------|-----------|-----------|-----------|
| -20.52664 | -15.60059 | -11.34619 | -11.28620 | -11.25659 | -11.25009 |
| -11.24314 | -11.24174 | -11.24054 | -11.23855 | -11.23794 | -11.23493 |
| -11.23120 | -11.23056 | -11.22999 | -11.22951 | -11.22850 | -11.22780 |
| -11.20908 | -1.39731  | -1.26971  | -1.16517  | -1.14902  | -1.10608  |
| -1.03012  | -1.01871  | -1.01795  | -1.01270  | -0.96258  | -0.93279  |
| -0.85823  | -0.83901  | -0.83337  | -0.82171  | -0.79613  | -0.74121  |
| -0.71101  | -0.69502  | -0.67287  | -0.66435  | -0.64466  | -0.63757  |
| -0.62743  | -0.61492  | -0.61226  | -0.60861  | -0.59694  | -0.58330  |
| -0.57639  | -0.55344  | -0.54884  | -0.54069  | -0.53098  | -0.51904  |
| -0.51483  | -0.50724  | -0.50111  | -0.49778  | -0.48458  | -0.46869  |
| -0.46290  | -0.42164  | -0.41155  | -0.34266  | -0.33292  | -0.32297  |
| -0.30209  | 0.12928   | 0.13405   | 0.14443   | 0.15223   | 0.20385   |
| 0.22972   | 0.24095   | 0.24889   | 0.26128   | 0.28804   |           |

end of program scf

start of program derla  
 end of program derla

start of program rwr  
 end of program rwr

start of program der1b

forces (hartrees/bohr) : total

| atom | label | x             | y             | z             |
|------|-------|---------------|---------------|---------------|
| 1    | H1    | -2.535610E-05 | 4.765911E-05  | -5.461188E-05 |
| 2    | C1    | -9.566438E-06 | -3.364197E-05 | 6.620546E-05  |
| 3    | C2    | -2.159057E-05 | -8.669955E-05 | -3.389464E-05 |
| 4    | C3    | 2.544861E-05  | 5.198787E-05  | 1.829793E-04  |
| 5    | C4    | -2.354193E-05 | -1.746254E-05 | -6.225811E-05 |
| 6    | C5    | -1.197278E-05 | 1.844462E-05  | 6.462218E-06  |
| 7    | C6    | -4.894027E-05 | 5.798080E-05  | -2.025740E-04 |

|       |       |               |               |               |
|-------|-------|---------------|---------------|---------------|
| 8     | C7    | 4.445640E-05  | 1.087713E-04  | 4.496167E-05  |
| 9     | H3    | -4.579615E-05 | 1.010771E-04  | -7.304683E-05 |
| 10    | H4    | -3.682852E-05 | 1.021405E-04  | -4.473549E-06 |
| 11    | H6    | -1.684824E-05 | 3.192090E-05  | 4.313067E-05  |
| 12    | C16   | -3.628948E-05 | 3.001228E-04  | 9.402457E-05  |
| 13    | C8    | -1.492883E-04 | -4.602869E-05 | -3.773039E-05 |
| 14    | N2    | -1.978983E-05 | -3.910021E-04 | 2.563304E-04  |
| 15    | C9    | -2.370911E-06 | 3.841507E-05  | -1.301884E-04 |
| 16    | C10   | -3.396275E-05 | -2.068337E-04 | 7.879877E-05  |
| 17    | O1    | -4.035825E-05 | 3.770991E-04  | -1.322296E-04 |
| 18    | C23   | -4.845145E-05 | 6.976128E-05  | -2.505076E-05 |
| 19    | C18   | 1.284974E-04  | 9.151605E-06  | 2.561810E-05  |
| 20    | C19   | 7.780482E-05  | -4.045839E-05 | -5.560339E-05 |
| 21    | C20   | 4.424364E-05  | 3.427295E-04  | 3.820855E-04  |
| 22    | C21   | 9.727075E-05  | 1.256628E-04  | 2.558036E-04  |
| 23    | C22   | -1.494975E-04 | 4.572891E-05  | -5.479044E-05 |
| 24    | H2    | -2.279007E-04 | -5.747398E-05 | -2.233183E-04 |
| 25    | H5    | -1.789975E-06 | -2.624105E-04 | -2.270184E-04 |
| 26    | H7    | -9.041280E-05 | -2.700797E-05 | -1.513422E-05 |
| 27    | H8    | -2.928528E-05 | -4.576682E-05 | -2.358365E-04 |
| 28    | H9    | -1.124274E-05 | -5.693067E-06 | -3.468369E-05 |
| 29    | H10   | -7.297373E-05 | -3.909792E-06 | -3.925837E-05 |
| 30    | H19   | 1.741090E-05  | -1.032409E-05 | -8.510606E-06 |
| 31    | H20   | -1.023351E-05 | 3.199483E-05  | -3.258801E-05 |
| 32    | H21   | -5.905993E-05 | -2.102603E-07 | 4.849995E-05  |
| 33    | H22   | 5.346530E-06  | -2.507314E-07 | -1.420271E-05 |
| 34    | H11   | 8.647774E-05  | 1.372383E-04  | 1.131339E-05  |
| 35    | H12   | -1.819118E-05 | 2.089626E-04  | -6.810475E-05 |
| 36    | H13   | -3.464694E-05 | 5.704635E-05  | -1.799398E-05 |
| ----- |       | -----         | -----         | -----         |
|       | total | -7.492295E-04 | 1.028721E-03  | -2.868879E-04 |

end of program der1b

start of program geopt 36

geometry optimization step 36

reading input hessian of dimension 108

in five columns format

reading input hessian of dimension 108

in five columns format

Level shifts adjusted to satisfy step-size constraints

Step size: 0.0102835

Cos(theta): 0.7341947

Final level shift: -6.8733468E-02

energy change: 1.0962E-05 \* ( 5.0000E-05 )

gradient maximum: 8.6702E-04 . ( 4.5000E-04 )

S456

gradient rms: 1.6867E-04 \* ( 3.0000E-04 )  
 step size: 0.01028 trust radius: 0.01000  
 displacement maximum: 5.8925E-03 . ( 1.8000E-03 )  
 displacement rms: 9.3103E-04 \* ( 1.2000E-03 )  
 predicted energy change: -1.0667E-05 geom step: 1.0284E-  
 02 full step: 1.0284E-02  
 molecular structure not yet converged...

center of mass moved by:  
 x: -6.4925E-05 y: 4.4896E-04 z: -5.3046E-06

new geometry:

|      | angstroms     |               |               |
|------|---------------|---------------|---------------|
| atom | x             | y             | z             |
| H1   | -1.1805528852 | 1.8875051559  | -2.2325992874 |
| C1   | -1.0989035971 | 2.1205019756  | -1.1844759532 |
| C2   | -0.8854915894 | 2.6958546792  | 1.5031139859  |
| C3   | -0.8788426726 | 1.0870766430  | -0.2890592261 |
| C4   | -1.2054736696 | 3.4348986971  | -0.7610703803 |
| C5   | -1.0992376625 | 3.7145377338  | 0.5890140734  |
| C6   | -0.7678963520 | 1.3781164489  | 1.0723596808  |
| C7   | -0.7863737720 | -0.3522496785 | -0.7564254353 |
| H3   | -1.3717811057 | 4.2231693968  | -1.4731444044 |
| H4   | -1.1868089968 | 4.7270146736  | 0.9420497937  |
| H6   | -0.8176257101 | 2.9343036896  | 2.5467414165  |
| C16  | 0.6133623923  | -0.7637564241 | -1.2107874648 |
| C8   | -1.3969896918 | -1.2502314714 | 0.3425143560  |
| N2   | -0.5093971497 | 0.3385732380  | 1.9934338244  |
| C9   | -0.7811022844 | -0.9763194272 | 1.7046850964  |
| C10  | 0.0094443589  | 0.6564384979  | 3.3159279632  |
| O1   | -0.5794224150 | -1.8498062899 | 2.5002037102  |
| C23  | -1.3854115319 | -2.7419786793 | 0.0239218948  |
| C18  | 3.1404962580  | -1.5862662863 | -2.0934242909 |
| C19  | 0.7613255769  | -1.4795609208 | -2.3943070261 |
| C20  | 1.7591553638  | -0.4569244010 | -0.4806250737 |
| C21  | 3.0083222558  | -0.8672893347 | -0.9152264890 |
| C22  | 2.0109043909  | -1.8889377589 | -2.8343547660 |
| H2   | -0.1088969944 | -1.7226515331 | -2.9807293551 |
| H5   | 1.6829092815  | 0.1095511988  | 0.4282625539  |
| H7   | 3.8795027701  | -0.6215599304 | -0.3336006551 |
| H8   | 2.0982996338  | -2.4413024832 | -3.7540017213 |
| H9   | 4.1121535243  | -1.9020638276 | -2.4304368222 |
| H10  | -1.4330103024 | -0.4535887687 | -1.6217671664 |
| H19  | -0.3753680097 | -3.1284214900 | -0.0213323770 |
| H20  | -1.8646329951 | -2.9202988912 | -0.9342018880 |
| H21  | -1.9190862659 | -3.2938801425 | 0.7858722684  |
| H22  | -2.4342889348 | -0.9272273551 | 0.4404252245  |
| H11  | 0.8100960870  | 1.3810484584  | 3.2297678723  |
| H12  | 0.3880011928  | -0.2493939840 | 3.7561937750  |
| H13  | -0.7649047806 | 1.0605791291  | 3.9606357410  |

nuclear repulsion energy..... 1414.897598326 hartrees

-----  
/ end of geometry optimization iteration 36 /  
-----

end of program geopt

start of program onee  
smallest eigenvalue of S: 3.334E-04  
number of canonical orbitals..... 368  
end of program onee

start of program probe  
end of program probe

start of program grid

number of gridpoints:  
atom H1 C1 C2 C3 C4 C5 C6  
C7  
grid # 1 72 87 89 90 89 88 84  
81  
grid # 2 116 97 96 98 97 97 94  
90  
grid # 3 217 182 184 194 183 184 189  
177  
grid # 4 216 326 328 338 328 328 323  
314

number of gridpoints:  
atom H3 H4 H6 C16 C8 N2 C9  
C10  
grid # 1 73 73 70 92 82 95 82  
69  
grid # 2 118 118 112 100 90 105 92  
78  
grid # 3 223 223 207 194 174 211 176  
147  
grid # 4 224 223 208 342 311 387 293  
275

number of gridpoints:  
atom O1 C23 C18 C19 C20 C21 C22  
H2  
grid # 1 111 74 89 88 88 89 89  
71  
grid # 2 123 80 97 95 96 97 96  
112  
grid # 3 257 150 183 183 182 184 183  
212

grid # 4      450      285      327      326      327      327      327  
 211

number of gridpoints:

| atom     | H5  | H7  | H8  | H9  | H10 | H19 | H20 |
|----------|-----|-----|-----|-----|-----|-----|-----|
| grid # 1 | 71  | 73  | 73  | 73  | 66  | 71  | 71  |
| grid # 2 | 111 | 118 | 118 | 118 | 106 | 108 | 110 |
| grid # 3 | 212 | 223 | 223 | 224 | 202 | 218 | 216 |
| grid # 4 | 207 | 223 | 224 | 224 | 197 | 212 | 216 |

number of gridpoints:

| atom     | H22 | H11 | H12 | H13 | total |
|----------|-----|-----|-----|-----|-------|
| grid # 1 | 69  | 71  | 70  | 71  | 2864  |
| grid # 2 | 110 | 109 | 107 | 111 | 3728  |
| grid # 3 | 214 | 213 | 212 | 217 | 7190  |
| grid # 4 | 211 | 211 | 209 | 218 | 9911  |

end of program grid

start of program rwr

end of program rwr

start of program scf

|      | i | u | d | i | g |                  | RMS      | maximum |
|------|---|---|---|---|---|------------------|----------|---------|
|      | t | p | i | c | r |                  | energy   | DIIS    |
|      | e | d | i | u | i | total energy     | density  | error   |
|      | r | t | s | t | d |                  | change   |         |
| etot | 1 | N | N | 1 | U | -783.03313608647 | 2.5E-05  | 1.3E-03 |
| etot | 2 | Y | Y | 4 | M | -783.03324063193 | 1.0E-04  | 5.3E-04 |
| etot | 3 | Y | Y | 4 | M | -783.03325820681 | 1.8E-05  | 1.3E-04 |
| etot | 4 | Y | N | 4 | M | -783.03325709643 | -1.1E-06 | 0.0E+00 |

Energy components, in hartrees:

|     |                               |                   |       |
|-----|-------------------------------|-------------------|-------|
| (A) | Nuclear repulsion.....        | 1414.89759832643  |       |
| (E) | Total one-electron terms..... | -3874.36886240210 |       |
| (I) | Total two-electron terms..... | 1676.43800697924  |       |
| (L) | Electronic energy.....        | -2197.93085542286 | (E+I) |
| (N) | Total energy.....             | -783.03325709643  | (A+L) |

SCFE: SCF energy: HF      -783.03325709643 hartrees      iterations:

4

HOMO energy: -0.30203  
LUMO energy: 0.12928

Orbital energies:

|           |           |           |           |           |           |
|-----------|-----------|-----------|-----------|-----------|-----------|
| -20.52693 | -15.60010 | -11.34580 | -11.28575 | -11.25659 | -11.24981 |
| -11.24296 | -11.24133 | -11.24051 | -11.23871 | -11.23790 | -11.23492 |
| -11.23148 | -11.23061 | -11.23016 | -11.22982 | -11.22870 | -11.22760 |
| -11.20917 | -1.39749  | -1.26944  | -1.16499  | -1.14892  | -1.10595  |
| -1.03001  | -1.01861  | -1.01779  | -1.01270  | -0.96255  | -0.93266  |
| -0.85808  | -0.83890  | -0.83325  | -0.82165  | -0.79604  | -0.74108  |
| -0.71094  | -0.69497  | -0.67282  | -0.66427  | -0.64457  | -0.63753  |
| -0.62742  | -0.61486  | -0.61224  | -0.60848  | -0.59692  | -0.58336  |
| -0.57625  | -0.55336  | -0.54872  | -0.54064  | -0.53099  | -0.51904  |
| -0.51488  | -0.50717  | -0.50097  | -0.49774  | -0.48457  | -0.46861  |
| -0.46284  | -0.42149  | -0.41149  | -0.34254  | -0.33295  | -0.32283  |
| -0.30203  | 0.12928   | 0.13402   | 0.14451   | 0.15236   | 0.20400   |
| 0.22969   | 0.24104   | 0.24883   | 0.26136   | 0.28825   |           |

end of program scf

start of program derla  
end of program derla

start of program rwr  
end of program rwr

start of program derlb

forces (hartrees/bohr) : total

| atom | label | x             | y             | z             |
|------|-------|---------------|---------------|---------------|
| 1    | H1    | -1.421422E-05 | 1.622406E-05  | 3.560901E-05  |
| 2    | C1    | -3.080083E-05 | 1.051433E-04  | -8.263252E-05 |
| 3    | C2    | -5.691957E-05 | 1.383546E-04  | 1.688220E-05  |
| 4    | C3    | -3.691211E-05 | 1.051349E-05  | -2.069443E-04 |
| 5    | C4    | -1.969678E-05 | 7.274869E-05  | 4.063217E-05  |
| 6    | C5    | -2.273164E-05 | 4.388447E-05  | -1.617513E-05 |
| 7    | C6    | 5.562941E-05  | 3.228462E-05  | 1.572859E-04  |
| 8    | C7    | -1.121306E-04 | -5.746059E-05 | -5.729849E-05 |
| 9    | H3    | 5.409488E-06  | -3.934592E-05 | 5.634476E-05  |
| 10   | H4    | -3.212848E-06 | -4.309686E-05 | -1.262733E-05 |
| 11   | H6    | -3.317529E-05 | 3.122733E-05  | -6.182656E-05 |
| 12   | C16   | -1.860782E-05 | -2.420060E-04 | -8.275357E-05 |
| 13   | C8    | 1.366346E-04  | 1.090754E-04  | 1.336622E-05  |
| 14   | N2    | -6.348470E-05 | 4.613149E-04  | -2.851330E-04 |
| 15   | C9    | -7.796635E-05 | 3.691730E-05  | 1.210489E-04  |
| 16   | C10   | 1.208864E-05  | 1.943362E-04  | -4.546085E-05 |

S460



|       |       |               |               |               |
|-------|-------|---------------|---------------|---------------|
| 17    | O1    | 2.410879E-06  | -3.193304E-04 | 1.445500E-04  |
| 18    | C23   | 1.314074E-05  | -4.061377E-06 | -7.661916E-06 |
| 19    | C18   | -1.422226E-04 | 4.938421E-05  | -4.158892E-05 |
| 20    | C19   | -1.343307E-04 | 1.043663E-04  | 3.187558E-05  |
| 21    | C20   | -9.955109E-05 | -2.681346E-04 | -3.782832E-04 |
| 22    | C21   | -1.296386E-04 | -5.621549E-05 | -2.617739E-04 |
| 23    | C22   | 1.045027E-04  | 6.905157E-06  | 2.768787E-05  |
| 24    | H2    | 1.767673E-04  | 1.205974E-04  | 1.926198E-04  |
| 25    | H5    | -3.470847E-05 | 3.133744E-04  | 2.023798E-04  |
| 26    | H7    | 5.895365E-05  | 7.926851E-05  | 1.130112E-05  |
| 27    | H8    | -1.136032E-05 | 9.520055E-05  | 1.968011E-04  |
| 28    | H9    | -2.719035E-05 | 6.329673E-05  | 1.684234E-05  |
| 29    | H10   | 3.727970E-05  | 6.371943E-05  | 1.676385E-05  |
| 30    | H19   | -5.594514E-05 | 6.409139E-05  | -6.530179E-06 |
| 31    | H20   | -3.464908E-05 | 2.867019E-05  | 1.189737E-05  |
| 32    | H21   | 6.671015E-06  | 5.012837E-05  | -5.851659E-05 |
| 33    | H22   | -6.214990E-05 | 5.878777E-05  | -1.602531E-06 |
| 34    | H11   | -1.652207E-04 | -5.559288E-05 | -2.654897E-05 |
| 35    | H12   | -6.523428E-06 | -1.432918E-04 | 5.447587E-05  |
| 36    | H13   | 4.117845E-05  | -2.060084E-05 | -7.638846E-06 |
| ----- |       | -----         | -----         | -----         |
|       | total | -7.426767E-04 | 1.100678E-03  | -2.926329E-04 |

end of program derlb

start of program geopt 37

geometry optimization step 37

reading input hessian of dimension 108  
in five columns format  
reading input hessian of dimension 108  
in five columns format

Level shifts adjusted to satisfy step-size constraints

Step size: 0.0101675  
Cos(theta): 0.7121716

Final level shift: -6.0789028E-02

energy change: -1.0534E-05 \* ( 5.0000E-05 )  
gradient maximum: 8.4714E-04 . ( 4.5000E-04 )  
gradient rms: 1.6444E-04 \* ( 3.0000E-04 )  
step size: 0.01017 trust radius: 0.01000  
displacement maximum: 5.8939E-03 . ( 1.8000E-03 )  
displacement rms: 9.2052E-04 \* ( 1.2000E-03 )  
predicted energy change: -9.7181E-06 geom step: 1.0168E-02  
02 full step: 1.0168E-02  
molecular structure not yet converged...

center of mass moved by:

x: -1.4503E-06 y: -4.3085E-04 z: 3.4521E-05

new geometry:

|      | angstroms     |               |               |
|------|---------------|---------------|---------------|
| atom | x             | y             | z             |
| H1   | -1.1780098894 | 1.8887544911  | -2.2324632597 |
| C1   | -1.0965697255 | 2.1212064206  | -1.1842792882 |
| C2   | -0.8839258530 | 2.6953083894  | 1.5039143541  |
| C3   | -0.8781020208 | 1.0870775179  | -0.2893102970 |
| C4   | -1.2018132568 | 3.4355207527  | -0.7600344969 |
| C5   | -1.0960350414 | 3.7145024050  | 0.5901606857  |
| C6   | -0.7673708777 | 1.3776404944  | 1.0725627615  |
| C7   | -0.7866030439 | -0.3525052219 | -0.7566207331 |
| H3   | -1.3666861238 | 4.2242417020  | -1.4716772916 |
| H4   | -1.1825553221 | 4.7267785049  | 0.9436906374  |
| H6   | -0.8164765755 | 2.9333469055  | 2.5475617363  |
| C16  | 0.6131417686  | -0.7649859386 | -1.2103527003 |
| C8   | -1.3980510463 | -1.2499147580 | 0.3422266831  |
| N2   | -0.5103221891 | 0.3377601966  | 1.9932154100  |
| C9   | -0.7829181526 | -0.9773740956 | 1.7048669668  |
| C10  | 0.0073420459  | 0.6534770624  | 3.3167211228  |
| O1   | -0.5827735928 | -1.8519884375 | 2.5000116490  |
| C23  | -1.3881191576 | -2.7416442728 | 0.0229384326  |
| C18  | 3.1412136689  | -1.5833246169 | -2.0943125378 |
| C19  | 0.7611369782  | -1.4867493291 | -2.3895828406 |
| C20  | 1.7595013156  | -0.4491307393 | -0.4856723298 |
| C21  | 3.0090640036  | -0.8571738142 | -0.9209505771 |
| C22  | 2.0110563471  | -1.8948360931 | -2.8299138852 |
| H2   | -0.1092159932 | -1.7350094455 | -2.9722805179 |
| H5   | 1.6838238496  | 0.1261446981  | 0.4186911658  |
| H7   | 3.8810433554  | -0.6035007790 | -0.3434999542 |
| H8   | 2.0983062971  | -2.4526652744 | -3.7456670137 |
| H9   | 4.1134004863  | -1.8971526739 | -2.4315923249 |
| H10  | -1.4326137959 | -0.4530906697 | -1.6223606981 |
| H19  | -0.3785007452 | -3.1286324123 | -0.0239116735 |
| H20  | -1.8690820406 | -2.9193517764 | -0.9344147207 |
| H21  | -1.9210268019 | -3.2934262614 | 0.7853148752  |
| H22  | -2.4352007591 | -0.9258313967 | 0.4398668595  |
| H11  | 0.8083480772  | 1.3772599696  | 3.2323237922  |
| H12  | 0.3842430289  | -0.2540387549 | 3.7561520200  |
| H13  | -0.7671478746 | 1.0569756258  | 3.9615737830  |

nuclear repulsion energy..... 1414.893099359 hartrees

-----  
/ end of geometry optimization iteration 37 /  
-----

end of program geopt

start of program onee  
smallest eigenvalue of S: 3.335E-04

S462

number of canonical orbitals..... 368  
end of program onee

start of program probe  
end of program probe

start of program grid

number of gridpoints:

| atom     | H1  | C1  | C2  | C3  | C4  | C5  | C6  |
|----------|-----|-----|-----|-----|-----|-----|-----|
| C7       |     |     |     |     |     |     |     |
| grid # 1 | 72  | 87  | 89  | 89  | 89  | 88  | 83  |
| 81       |     |     |     |     |     |     |     |
| grid # 2 | 116 | 97  | 96  | 98  | 97  | 97  | 95  |
| 90       |     |     |     |     |     |     |     |
| grid # 3 | 217 | 182 | 184 | 194 | 183 | 184 | 189 |
| 177      |     |     |     |     |     |     |     |
| grid # 4 | 216 | 326 | 328 | 338 | 328 | 328 | 326 |
| 314      |     |     |     |     |     |     |     |

number of gridpoints:

| atom     | H3  | H4  | H6  | C16 | C8  | N2  | C9  |
|----------|-----|-----|-----|-----|-----|-----|-----|
| C10      |     |     |     |     |     |     |     |
| grid # 1 | 73  | 73  | 70  | 92  | 82  | 95  | 82  |
| 70       |     |     |     |     |     |     |     |
| grid # 2 | 118 | 118 | 112 | 100 | 90  | 105 | 92  |
| 79       |     |     |     |     |     |     |     |
| grid # 3 | 223 | 223 | 207 | 194 | 174 | 211 | 176 |
| 143      |     |     |     |     |     |     |     |
| grid # 4 | 224 | 223 | 208 | 342 | 311 | 387 | 293 |
| 273      |     |     |     |     |     |     |     |

number of gridpoints:

| atom     | O1  | C23 | C18 | C19 | C20 | C21 | C22 |
|----------|-----|-----|-----|-----|-----|-----|-----|
| H2       |     |     |     |     |     |     |     |
| grid # 1 | 111 | 74  | 89  | 88  | 88  | 89  | 89  |
| 71       |     |     |     |     |     |     |     |
| grid # 2 | 123 | 79  | 97  | 95  | 96  | 97  | 96  |
| 112      |     |     |     |     |     |     |     |
| grid # 3 | 257 | 149 | 183 | 183 | 182 | 184 | 183 |
| 212      |     |     |     |     |     |     |     |
| grid # 4 | 450 | 287 | 327 | 326 | 327 | 327 | 327 |
| 211      |     |     |     |     |     |     |     |

number of gridpoints:

| atom     | H5 | H7 | H8 | H9 | H10 | H19 | H20 |
|----------|----|----|----|----|-----|-----|-----|
| H21      |    |    |    |    |     |     |     |
| grid # 1 | 71 | 73 | 73 | 73 | 66  | 71  | 71  |
| 70       |    |    |    |    |     |     |     |

```

  grid # 2      111    118    118    118    106    108    110
108
  grid # 3      212    223    223    224    203    218    217
217
  grid # 4      207    223    224    224    196    212    216
215

```

number of gridpoints:

| atom     | H22 | H11 | H12 | H13 | total |
|----------|-----|-----|-----|-----|-------|
| grid # 1 | 69  | 71  | 70  | 71  | 2863  |
| grid # 2 | 110 | 109 | 107 | 111 | 3729  |
| grid # 3 | 214 | 213 | 212 | 217 | 7187  |
| grid # 4 | 211 | 211 | 209 | 218 | 9913  |

end of program grid

start of program rwr

end of program rwr

start of program scf

|      | i | u | d | i | g |                  | RMS     | maximum |
|------|---|---|---|---|---|------------------|---------|---------|
|      | t | p | i | c | r |                  | energy  | DIIS    |
|      | e | d | i | u | i | total energy     | density | error   |
|      | r | t | s | t | d | change           | change  |         |
| etot | 1 | N | N | 1 | U | -783.03312783248 | 2.5E-05 | 1.3E-03 |
| etot | 2 | Y | Y | 4 | M | -783.03323054953 | 1.0E-04 | 5.4E-04 |
| etot | 3 | Y | Y | 4 | M | -783.03324337147 | 1.3E-05 | 1.3E-04 |
| etot | 4 | Y | N | 4 | M | -783.03324718516 | 3.8E-06 | 0.0E+00 |

Energy components, in hartrees:

|     |                               |                   |       |
|-----|-------------------------------|-------------------|-------|
| (A) | Nuclear repulsion.....        | 1414.89309935852  |       |
| (E) | Total one-electron terms..... | -3874.35101188418 |       |
| (I) | Total two-electron terms..... | 1676.42466534051  |       |
| (L) | Electronic energy.....        | -2197.92634654368 | (E+I) |
| (N) | Total energy.....             | -783.03324718516  | (A+L) |

SCFE: SCF energy: HF -783.03324718516 hartrees iterations:  
4

HOMO energy: -0.30210  
LUMO energy: 0.12929

Orbital energies:

|           |           |           |           |           |           |
|-----------|-----------|-----------|-----------|-----------|-----------|
| -20.52664 | -15.60058 | -11.34619 | -11.28620 | -11.25659 | -11.25009 |
| -11.24315 | -11.24174 | -11.24054 | -11.23855 | -11.23794 | -11.23493 |
| -11.23120 | -11.23055 | -11.23000 | -11.22953 | -11.22851 | -11.22780 |

|           |          |          |          |          |          |
|-----------|----------|----------|----------|----------|----------|
| -11.20908 | -1.39730 | -1.26970 | -1.16517 | -1.14902 | -1.10607 |
| -1.03012  | -1.01871 | -1.01796 | -1.01270 | -0.96258 | -0.93279 |
| -0.85823  | -0.83901 | -0.83337 | -0.82172 | -0.79613 | -0.74121 |
| -0.71100  | -0.69502 | -0.67287 | -0.66435 | -0.64467 | -0.63757 |
| -0.62743  | -0.61492 | -0.61225 | -0.60861 | -0.59694 | -0.58330 |
| -0.57639  | -0.55345 | -0.54884 | -0.54068 | -0.53097 | -0.51904 |
| -0.51483  | -0.50724 | -0.50111 | -0.49778 | -0.48458 | -0.46869 |
| -0.46290  | -0.42163 | -0.41155 | -0.34266 | -0.33292 | -0.32297 |
| -0.30210  | 0.12929  | 0.13404  | 0.14443  | 0.15223  | 0.20384  |
| 0.22972   | 0.24095  | 0.24891  | 0.26128  | 0.28802  |          |

end of program scf

start of program derla  
end of program derla

start of program rwr  
end of program rwr

start of program derlb

forces (hartrees/bohr) : total

| atom | label | x             | y             | z             |
|------|-------|---------------|---------------|---------------|
| 1    | H1    | -2.558109E-05 | 4.764163E-05  | -5.461483E-05 |
| 2    | C1    | -9.694870E-06 | -3.621850E-05 | 6.375362E-05  |
| 3    | C2    | -1.881120E-05 | -8.829173E-05 | -2.992817E-05 |
| 4    | C3    | 2.176462E-05  | 4.881963E-05  | 1.836421E-04  |
| 5    | C4    | -2.321922E-05 | -1.265752E-05 | -5.966461E-05 |
| 6    | C5    | -1.535243E-05 | 1.919338E-05  | -6.431766E-07 |
| 7    | C6    | -5.036272E-05 | 4.182262E-05  | -1.969955E-04 |
| 8    | C7    | 4.748481E-05  | 1.128321E-04  | 4.001148E-05  |
| 9    | H3    | -4.651797E-05 | 1.040032E-04  | -7.530917E-05 |
| 10   | H4    | -3.752926E-05 | 1.036654E-04  | -4.047348E-06 |
| 11   | H6    | -1.425323E-05 | 3.041198E-05  | 4.520956E-05  |
| 12   | C16   | -3.628711E-05 | 2.970491E-04  | 8.982047E-05  |
| 13   | C8    | -1.507670E-04 | -4.732473E-05 | -4.208407E-05 |
| 14   | N2    | -1.947924E-05 | -4.196673E-04 | 2.360812E-04  |
| 15   | C9    | 7.222703E-07  | 4.566022E-05  | -1.083424E-04 |
| 16   | C10   | -3.707115E-05 | -2.045319E-04 | 7.531876E-05  |
| 17   | O1    | -3.883083E-05 | 3.986977E-04  | -1.487326E-04 |
| 18   | C23   | -4.396610E-05 | 6.162328E-05  | -1.864912E-05 |
| 19   | C18   | 1.233810E-04  | 9.135880E-06  | 2.498330E-05  |
| 20   | C19   | 9.026617E-05  | -4.410007E-05 | -6.093035E-05 |
| 21   | C20   | 5.466546E-05  | 3.445673E-04  | 3.865912E-04  |
| 22   | C21   | 1.000057E-04  | 1.293587E-04  | 2.613709E-04  |
| 23   | C22   | -1.556441E-04 | 5.124867E-05  | -5.037288E-05 |
| 24   | H2    | -2.279003E-04 | -5.839602E-05 | -2.232224E-04 |

|       |     |               |               |               |
|-------|-----|---------------|---------------|---------------|
| 25    | H5  | -3.495610E-06 | -2.621306E-04 | -2.254230E-04 |
| 26    | H7  | -9.633620E-05 | -2.733072E-05 | -1.832394E-05 |
| 27    | H8  | -2.974756E-05 | -4.647492E-05 | -2.362929E-04 |
| 28    | H9  | -1.414532E-05 | -6.573289E-06 | -3.474903E-05 |
| 29    | H10 | -7.305411E-05 | -4.604335E-06 | -3.687351E-05 |
| 30    | H19 | 3.163693E-06  | -3.347030E-06 | -7.087484E-06 |
| 31    | H20 | -1.241795E-05 | 2.993322E-05  | -3.257361E-05 |
| 32    | H21 | -5.362958E-05 | 4.149991E-06  | 4.073772E-05  |
| 33    | H22 | 1.212486E-05  | -3.275757E-06 | -1.418639E-05 |
| 34    | H11 | 9.140831E-05  | 1.381627E-04  | 1.499670E-05  |
| 35    | H12 | -2.299067E-05 | 2.106471E-04  | -6.872140E-05 |
| 36    | H13 | -3.854167E-05 | 6.136728E-05  | -1.041159E-05 |
| ----- |     | -----         | -----         | -----         |
| total |     | -7.506396E-04 | 1.025066E-03  | -2.956625E-04 |

end of program derlb

start of program geopt 38

geometry optimization step 38

reading input hessian of dimension 108  
in five columns format  
reading input hessian of dimension 108  
in five columns format

Level shifts adjusted to satisfy step-size constraints

Step size: 0.0102741  
Cos(theta): 0.7327022

Final level shift: -6.8279924E-02

energy change: 9.9113E-06 \* ( 5.0000E-05 )  
gradient maximum: 8.6857E-04 . ( 4.5000E-04 )  
gradient rms: 1.6997E-04 \* ( 3.0000E-04 )  
step size: 0.01027 trust radius: 0.01000  
displacement maximum: 5.8986E-03 . ( 1.8000E-03 )  
displacement rms: 9.3017E-04 \* ( 1.2000E-03 )  
predicted energy change: -1.0670E-05 geom step: 1.0274E-  
02 full step: 1.0274E-02  
molecular structure not yet converged...

center of mass moved by:

x: -2.0284E-05 y: 4.5568E-04 z: -2.9104E-05

new geometry:

|      |               |              |               | angstroms |  |  |
|------|---------------|--------------|---------------|-----------|--|--|
| atom | x             | y            | z             |           |  |  |
| H1   | -1.1805551294 | 1.8876302015 | -2.2326508487 |           |  |  |
| C1   | -1.0989315220 | 2.1205852778 | -1.1845163662 |           |  |  |
| C2   | -0.8856938977 | 2.6958388767 | 1.5031156600  |           |  |  |

|     |               |               |               |
|-----|---------------|---------------|---------------|
| C3  | -0.8787611130 | 1.0871462361  | -0.2891353249 |
| C4  | -1.2056702049 | 3.4349537753  | -0.7610528278 |
| C5  | -1.0995423743 | 3.7145402322  | 0.5890516678  |
| C6  | -0.7678462856 | 1.3781521188  | 1.0722920964  |
| C7  | -0.7862987866 | -0.3521863950 | -0.7564912029 |
| H3  | -1.3720603692 | 4.2232383701  | -1.4730985536 |
| H4  | -1.1872963883 | 4.7269875023  | 0.9421293809  |
| H6  | -0.8179502662 | 2.9342162880  | 2.5467724565  |
| C16 | 0.6134453593  | -0.7637691733 | -1.2107605799 |
| C8  | -1.3970317927 | -1.2501274008 | 0.3424339158  |
| N2  | -0.5092493934 | 0.3385897208  | 1.9933100453  |
| C9  | -0.7811961383 | -0.9762340452 | 1.7046440609  |
| C10 | 0.0098942999  | 0.6563308085  | 3.3157376699  |
| O1  | -0.5796528777 | -1.8496842305 | 2.5002275168  |
| C23 | -1.3855788918 | -2.7418879859 | 0.0238827379  |
| C18 | 3.1405695947  | -1.5864626122 | -2.0932272572 |
| C19 | 0.7614317672  | -1.4795883185 | -2.3942728769 |
| C20 | 1.7592151558  | -0.4570053713 | -0.4805211010 |
| C21 | 3.0083802237  | -0.8674658202 | -0.9150382568 |
| C22 | 2.0110039561  | -1.8890524356 | -2.8342377321 |
| H2  | -0.1087748604 | -1.7226095131 | -2.9807535654 |
| H5  | 1.6829500067  | 0.1094863325  | 0.4283518089  |
| H7  | 3.8795410835  | -0.6218107255 | -0.3333546053 |
| H8  | 2.0984151874  | -2.4414296767 | -3.7538835719 |
| H9  | 4.1122179609  | -1.9023480267 | -2.4301785900 |
| H10 | -1.4328902973 | -0.4535128545 | -1.6218643806 |
| H19 | -0.3755819445 | -3.1284172346 | -0.0213222745 |
| H20 | -1.8648032911 | -2.9202026190 | -0.9342422346 |
| H21 | -1.9193263352 | -3.2937162139 | 0.7858334384  |
| H22 | -2.4343162973 | -0.9270580337 | 0.4402837571  |
| H11 | 0.8099398723  | 1.3815932732  | 3.2294990387  |
| H12 | 0.3893372430  | -0.2493722273 | 3.7555082582  |
| H13 | -0.7644454903 | 1.0596392912  | 3.9609788952  |

nuclear repulsion energy..... 1414.896952044 hartrees

-----  
 / end of geometry optimization iteration 38 /  
 -----

end of program geopt

start of program onee

smallest eigenvalue of S: 3.334E-04

number of canonical orbitals..... 368

end of program onee

start of program probe

end of program probe

start of program grid

number of gridpoints:

| atom     | H1  | C1  | C2  | C3  | C4  | C5  | C6  |
|----------|-----|-----|-----|-----|-----|-----|-----|
| C7       |     |     |     |     |     |     |     |
| grid # 1 | 72  | 87  | 89  | 90  | 89  | 88  | 84  |
| 81       |     |     |     |     |     |     |     |
| grid # 2 | 116 | 97  | 96  | 98  | 97  | 97  | 94  |
| 90       |     |     |     |     |     |     |     |
| grid # 3 | 217 | 182 | 184 | 194 | 183 | 184 | 189 |
| 177      |     |     |     |     |     |     |     |
| grid # 4 | 216 | 326 | 328 | 338 | 328 | 328 | 323 |
| 314      |     |     |     |     |     |     |     |

number of gridpoints:

| atom     | H3  | H4  | H6  | C16 | C8  | N2  | C9  |
|----------|-----|-----|-----|-----|-----|-----|-----|
| C10      |     |     |     |     |     |     |     |
| grid # 1 | 73  | 73  | 70  | 92  | 82  | 95  | 82  |
| 69       |     |     |     |     |     |     |     |
| grid # 2 | 118 | 118 | 112 | 100 | 90  | 105 | 92  |
| 78       |     |     |     |     |     |     |     |
| grid # 3 | 223 | 223 | 207 | 194 | 174 | 211 | 176 |
| 147      |     |     |     |     |     |     |     |
| grid # 4 | 224 | 223 | 208 | 342 | 311 | 387 | 293 |
| 276      |     |     |     |     |     |     |     |

number of gridpoints:

| atom     | O1  | C23 | C18 | C19 | C20 | C21 | C22 |
|----------|-----|-----|-----|-----|-----|-----|-----|
| H2       |     |     |     |     |     |     |     |
| grid # 1 | 111 | 74  | 89  | 88  | 88  | 89  | 89  |
| 71       |     |     |     |     |     |     |     |
| grid # 2 | 123 | 80  | 97  | 95  | 96  | 97  | 96  |
| 112      |     |     |     |     |     |     |     |
| grid # 3 | 257 | 150 | 183 | 183 | 182 | 184 | 183 |
| 212      |     |     |     |     |     |     |     |
| grid # 4 | 450 | 285 | 327 | 326 | 327 | 327 | 327 |
| 211      |     |     |     |     |     |     |     |

number of gridpoints:

| atom     | H5  | H7  | H8  | H9  | H10 | H19 | H20 |
|----------|-----|-----|-----|-----|-----|-----|-----|
| H21      |     |     |     |     |     |     |     |
| grid # 1 | 71  | 73  | 73  | 73  | 66  | 71  | 71  |
| 70       |     |     |     |     |     |     |     |
| grid # 2 | 111 | 118 | 118 | 118 | 106 | 108 | 110 |
| 108      |     |     |     |     |     |     |     |
| grid # 3 | 212 | 223 | 223 | 224 | 202 | 218 | 216 |
| 217      |     |     |     |     |     |     |     |
| grid # 4 | 207 | 223 | 224 | 224 | 197 | 212 | 216 |
| 215      |     |     |     |     |     |     |     |

number of gridpoints:

| atom | H22 | H11 | H12 | H13 | total |
|------|-----|-----|-----|-----|-------|
|------|-----|-----|-----|-----|-------|



```

grid # 1      69      71      70      71      2864
grid # 2     110     109     108     111     3729
grid # 3     214     213     212     217     7190
grid # 4     211     211     209     218     9912

```

end of program grid

```

start of program rwr
end of program rwr

```

start of program scf

|      | i | u | d | i | g |                  | energy   | RMS     | maximum |
|------|---|---|---|---|---|------------------|----------|---------|---------|
|      | t | p | i | c | r |                  | change   | density | DIIS    |
|      | e | d | i | u | i | total energy     |          | change  | error   |
|      | r | t | s | t | d |                  |          |         |         |
| etot | 1 | N | N | 1 | U | -783.03313554497 |          | 2.5E-05 | 1.3E-03 |
| etot | 2 | Y | Y | 4 | M | -783.03324073977 | 1.1E-04  | 1.2E-05 | 5.3E-04 |
| etot | 3 | Y | Y | 4 | M | -783.03325788170 | 1.7E-05  | 3.7E-06 | 1.3E-04 |
| etot | 4 | Y | N | 4 | M | -783.03325660737 | -1.3E-06 | 0.0E+00 | 0.0E+00 |

Energy components, in hartrees:

```

(A) Nuclear repulsion..... 1414.89695204358
(E) Total one-electron terms..... -3874.36757926531
(I) Total two-electron terms..... 1676.43737061437
(L) Electronic energy..... -2197.93020865095 (E+I)
(N) Total energy..... -783.03325660737 (A+L)

```

```

SCFE: SCF energy: HF      -783.03325660737 hartrees  iterations:
4

```

```

HOMO energy:      -0.30203
LUMO energy:       0.12928

```

Orbital energies:

```

-20.52692  -15.60009  -11.34579  -11.28574  -11.25660  -11.24981
-11.24296  -11.24133  -11.24051  -11.23871  -11.23790  -11.23493
-11.23148  -11.23061  -11.23017  -11.22982  -11.22870  -11.22760
-11.20917  -1.39749   -1.26944   -1.16499   -1.14892   -1.10595
-1.03001   -1.01861   -1.01779   -1.01270   -0.96255   -0.93266
-0.85808   -0.83891   -0.83326   -0.82165   -0.79604   -0.74108
-0.71094   -0.69497   -0.67281   -0.66427   -0.64458   -0.63752
-0.62742   -0.61486   -0.61224   -0.60847   -0.59691   -0.58336
-0.57624   -0.55337   -0.54872   -0.54064   -0.53099   -0.51904
-0.51487   -0.50717   -0.50097   -0.49774   -0.48457   -0.46861
-0.46284   -0.42149   -0.41149   -0.34253   -0.33295   -0.32283
-0.30203   0.12928    0.13401    0.14451    0.15236    0.20400

```

0.22969 0.24104 0.24884 0.26136 0.28825

end of program scf

start of program derla  
end of program derla

start of program rwr  
end of program rwr

start of program der1b

forces (hartrees/bohr) : total

| atom | label | x             | y             | z             |
|------|-------|---------------|---------------|---------------|
| 1    | H1    | -1.398445E-05 | 1.503832E-05  | 3.577500E-05  |
| 2    | C1    | -3.017484E-05 | 1.039840E-04  | -8.096924E-05 |
| 3    | C2    | -5.272708E-05 | 1.437063E-04  | 1.623343E-05  |
| 4    | C3    | -4.040740E-05 | 1.207328E-05  | -2.076370E-04 |
| 5    | C4    | -1.919358E-05 | 6.981469E-05  | 4.044953E-05  |
| 6    | C5    | -2.161912E-05 | 4.342789E-05  | -1.219258E-05 |
| 7    | C6    | 4.672040E-05  | 3.559405E-05  | 1.566970E-04  |
| 8    | C7    | -1.080201E-04 | -6.066380E-05 | -5.355723E-05 |
| 9    | H3    | 6.215848E-06  | -4.136248E-05 | 5.850796E-05  |
| 10   | H4    | -3.031220E-06 | -4.333894E-05 | -1.226948E-05 |
| 11   | H6    | -3.411566E-05 | 3.171966E-05  | -6.360408E-05 |
| 12   | C16   | -1.737377E-05 | -2.418432E-04 | -8.162114E-05 |
| 13   | C8    | 1.292981E-04  | 1.092009E-04  | 1.907578E-05  |
| 14   | N2    | -5.538742E-05 | 4.821138E-04  | -2.664669E-04 |
| 15   | C9    | -7.234815E-05 | 2.687622E-05  | 9.857525E-05  |
| 16   | C10   | 1.142167E-05  | 2.046857E-04  | -5.182523E-05 |
| 17   | O1    | -1.841168E-07 | -3.379504E-04 | 1.529862E-04  |
| 18   | C23   | 6.786875E-06  | 1.626234E-06  | -8.350499E-06 |
| 19   | C18   | -1.432828E-04 | 4.939406E-05  | -4.136158E-05 |
| 20   | C19   | -1.400756E-04 | 1.081144E-04  | 3.601362E-05  |
| 21   | C20   | -1.033761E-04 | -2.702268E-04 | -3.841537E-04 |
| 22   | C21   | -1.322794E-04 | -5.995885E-05 | -2.671739E-04 |
| 23   | C22   | 1.102365E-04  | 3.983540E-06  | 2.515502E-05  |
| 24   | H2    | 1.785265E-04  | 1.204218E-04  | 1.943111E-04  |
| 25   | H5    | -3.549816E-05 | 3.133566E-04  | 2.033529E-04  |
| 26   | H7    | 6.004133E-05  | 8.025631E-05  | 1.126847E-05  |
| 27   | H8    | -1.048076E-05 | 9.768682E-05  | 2.011678E-04  |
| 28   | H9    | -2.544794E-05 | 6.399926E-05  | 1.727296E-05  |
| 29   | H10   | 3.670387E-05  | 6.416910E-05  | 1.500928E-05  |
| 30   | H19   | -4.596635E-05 | 5.949003E-05  | -8.537426E-06 |
| 31   | H20   | -3.242425E-05 | 2.994185E-05  | 1.168120E-05  |
| 32   | H21   | 6.553888E-06  | 5.068087E-05  | -5.658442E-05 |
| 33   | H22   | -6.213247E-05 | 6.098173E-05  | -2.224601E-06 |

|       |       |               |               |               |
|-------|-------|---------------|---------------|---------------|
| 34    | H11   | -1.633384E-04 | -6.081377E-05 | -2.943311E-05 |
| 35    | H12   | -6.335575E-06 | -1.452494E-04 | 5.406241E-05  |
| 36    | H13   | 3.502740E-05  | -2.019874E-05 | -1.219174E-05 |
| ----- |       |               |               |               |
|       | total | -7.416725E-04 | 1.100731E-03  | -2.925588E-04 |

end of program der1b

start of program geopt 39

geometry optimization step 39

reading input hessian of dimension 108  
in five columns format  
reading input hessian of dimension 108  
in five columns format

Level shifts adjusted to satisfy step-size constraints

Step size: 0.0101736

Cos(theta): 0.7136908

Final level shift: -6.1301035E-02

energy change: -9.4222E-06 \* ( 5.0000E-05 )  
gradient maximum: 8.4978E-04 . ( 4.5000E-04 )  
gradient rms: 1.6570E-04 \* ( 3.0000E-04 )  
step size: 0.01017 trust radius: 0.01000  
displacement maximum: 5.8860E-03 . ( 1.8000E-03 )  
displacement rms: 9.2108E-04 \* ( 1.2000E-03 )  
predicted energy change: -9.8170E-06 geom step: 1.0174E-  
02 full step: 1.0174E-02  
molecular structure not yet converged...

center of mass moved by:

x: -2.5012E-05 y: -4.4178E-04 z: 4.9325E-05

new geometry:

|      | angstroms     |               |               |
|------|---------------|---------------|---------------|
| atom | x             | y             | z             |
| H1   | -1.1779593606 | 1.8888472830  | -2.2325084884 |
| C1   | -1.0965641099 | 2.1212715617  | -1.1843146083 |
| C2   | -0.8841244514 | 2.6953059716  | 1.5039178010  |
| C3   | -0.8780418791 | 1.0871363558  | -0.2893665598 |
| C4   | -1.2019365270 | 3.4355603720  | -0.7600254941 |
| C5   | -1.0962797517 | 3.7145108690  | 0.5901871233  |
| C6   | -0.7673620854 | 1.3776793269  | 1.0725117202  |
| C7   | -0.7865442359 | -0.3524542322 | -0.7566636680 |
| H3   | -1.3668440048 | 4.2242909592  | -1.4716490406 |
| H4   | -1.1829484821 | 4.7267651607  | 0.9437422698  |
| H6   | -0.8168103183 | 2.9332868393  | 2.5475894156  |
| C16  | 0.6132064610  | -0.7650003831 | -1.2103118614 |

S471

|     |               |               |               |
|-----|---------------|---------------|---------------|
| C8  | -1.3981102056 | -1.2498280704 | 0.3421556045  |
| N2  | -0.5102145435 | 0.3377810777  | 1.9931235428  |
| C9  | -0.7830246481 | -0.9773217306 | 1.7048285324  |
| C10 | 0.0078076524  | 0.6533976879  | 3.3165115407  |
| O1  | -0.5830429477 | -1.8519248740 | 2.5000363461  |
| C23 | -1.3882443955 | -2.7415623093 | 0.0228822233  |
| C18 | 3.1412903359  | -1.5834726501 | -2.0941408263 |
| C19 | 0.7612278937  | -1.4867711375 | -2.3895366683 |
| C20 | 1.7595442794  | -0.4492050470 | -0.4855736546 |
| C21 | 3.0091113795  | -0.8573142142 | -0.9207861868 |
| C22 | 2.0111531091  | -1.8949252752 | -2.8298034429 |
| H2  | -0.1091069814 | -1.7349751871 | -2.9722862045 |
| H5  | 1.6838499759  | 0.1260797457  | 0.4187801335  |
| H7  | 3.8810755457  | -0.6036854253 | -0.3432863671 |
| H8  | 2.0984236266  | -2.4527517657 | -3.7455554517 |
| H9  | 4.1134804287  | -1.8973501266 | -2.4313683306 |
| H10 | -1.4325022290 | -0.4530199941 | -1.6224471896 |
| H19 | -0.3786465345 | -3.1286331457 | -0.0238742545 |
| H20 | -1.8691356301 | -2.9192463570 | -0.9345116717 |
| H21 | -1.9212588689 | -3.2932948603 | 0.7852254724  |
| H22 | -2.4352510523 | -0.9256884813 | 0.4397311698  |
| H11 | 0.8082719992  | 1.3777452964  | 3.2319535410  |
| H12 | 0.3855259064  | -0.2539988216 | 3.7554945791  |
| H13 | -0.7666510989 | 1.0561691019  | 3.9618495265  |

nuclear repulsion energy..... 1414.892408731 hartrees

-----  
 / end of geometry optimization iteration 39 /  
 -----

end of program geopt

start of program onee  
 smallest eigenvalue of S: 3.335E-04  
 number of canonical orbitals..... 368  
 end of program onee

start of program probe  
 end of program probe

start of program grid

number of gridpoints:

| atom     | H1  | C1 | C2 | C3 | C4 | C5 | C6 |
|----------|-----|----|----|----|----|----|----|
| C7       |     |    |    |    |    |    |    |
| grid # 1 | 72  | 87 | 89 | 89 | 89 | 88 | 83 |
| 81       |     |    |    |    |    |    |    |
| grid # 2 | 116 | 97 | 96 | 98 | 97 | 97 | 95 |
| 90       |     |    |    |    |    |    |    |

|          |     |     |     |     |     |     |     |
|----------|-----|-----|-----|-----|-----|-----|-----|
| grid # 3 | 217 | 182 | 184 | 194 | 183 | 184 | 189 |
| 177      |     |     |     |     |     |     |     |
| grid # 4 | 216 | 326 | 328 | 338 | 328 | 328 | 326 |
| 314      |     |     |     |     |     |     |     |

number of gridpoints:

|          |     |     |     |     |     |     |     |
|----------|-----|-----|-----|-----|-----|-----|-----|
| atom     | H3  | H4  | H6  | C16 | C8  | N2  | C9  |
| C10      |     |     |     |     |     |     |     |
| grid # 1 | 73  | 73  | 70  | 92  | 82  | 95  | 82  |
| 70       |     |     |     |     |     |     |     |
| grid # 2 | 118 | 118 | 112 | 100 | 90  | 105 | 92  |
| 79       |     |     |     |     |     |     |     |
| grid # 3 | 223 | 223 | 207 | 194 | 174 | 211 | 176 |
| 143      |     |     |     |     |     |     |     |
| grid # 4 | 224 | 223 | 208 | 342 | 311 | 387 | 293 |
| 273      |     |     |     |     |     |     |     |

number of gridpoints:

|          |     |     |     |     |     |     |     |
|----------|-----|-----|-----|-----|-----|-----|-----|
| atom     | O1  | C23 | C18 | C19 | C20 | C21 | C22 |
| H2       |     |     |     |     |     |     |     |
| grid # 1 | 111 | 74  | 89  | 88  | 88  | 89  | 89  |
| 71       |     |     |     |     |     |     |     |
| grid # 2 | 123 | 79  | 97  | 95  | 96  | 97  | 96  |
| 112      |     |     |     |     |     |     |     |
| grid # 3 | 257 | 149 | 183 | 183 | 182 | 184 | 183 |
| 212      |     |     |     |     |     |     |     |
| grid # 4 | 450 | 287 | 327 | 326 | 327 | 327 | 327 |
| 211      |     |     |     |     |     |     |     |

number of gridpoints:

|          |     |     |     |     |     |     |     |
|----------|-----|-----|-----|-----|-----|-----|-----|
| atom     | H5  | H7  | H8  | H9  | H10 | H19 | H20 |
| H21      |     |     |     |     |     |     |     |
| grid # 1 | 71  | 73  | 73  | 73  | 66  | 71  | 71  |
| 70       |     |     |     |     |     |     |     |
| grid # 2 | 111 | 118 | 118 | 118 | 106 | 108 | 110 |
| 108      |     |     |     |     |     |     |     |
| grid # 3 | 212 | 223 | 223 | 224 | 203 | 218 | 217 |
| 217      |     |     |     |     |     |     |     |
| grid # 4 | 207 | 223 | 224 | 224 | 196 | 212 | 216 |
| 215      |     |     |     |     |     |     |     |

number of gridpoints:

|          |     |     |     |     |       |
|----------|-----|-----|-----|-----|-------|
| atom     | H22 | H11 | H12 | H13 | total |
| grid # 1 | 69  | 71  | 70  | 71  | 2863  |
| grid # 2 | 110 | 109 | 107 | 111 | 3729  |
| grid # 3 | 214 | 214 | 212 | 217 | 7188  |
| grid # 4 | 211 | 211 | 209 | 218 | 9913  |

end of program grid

start of program rwr

end of program rwr

start of program scf

|      | i | u | d | i | g |                  | RMS     | maximum |
|------|---|---|---|---|---|------------------|---------|---------|
|      | t | p | i | c | r |                  | energy  | DIIS    |
|      | e | d | i | u | i | total energy     | density | error   |
|      | r | t | s | t | d | change           | change  |         |
| etot | 1 | N | N | 1 | U | -783.03312721655 | 2.5E-05 | 1.3E-03 |
| etot | 2 | Y | Y | 4 | M | -783.03323038921 | 1.0E-04 | 5.4E-04 |
| etot | 3 | Y | Y | 4 | M | -783.03324325592 | 1.3E-05 | 1.3E-04 |
| etot | 4 | Y | N | 4 | M | -783.03324684579 | 3.6E-06 | 0.0E+00 |

Energy components, in hartrees:

|     |                               |                   |       |
|-----|-------------------------------|-------------------|-------|
| (A) | Nuclear repulsion.....        | 1414.89240873069  |       |
| (E) | Total one-electron terms..... | -3874.34964094500 |       |
| (I) | Total two-electron terms..... | 1676.42398536852  |       |
| (L) | Electronic energy.....        | -2197.92565557647 | (E+I) |
| (N) | Total energy.....             | -783.03324684579  | (A+L) |

SCFE: SCF energy: HF -783.03324684579 hartrees iterations:  
4

HOMO energy: -0.30210  
LUMO energy: 0.12929

Orbital energies:

|           |           |           |           |           |           |
|-----------|-----------|-----------|-----------|-----------|-----------|
| -20.52664 | -15.60058 | -11.34619 | -11.28620 | -11.25659 | -11.25009 |
| -11.24315 | -11.24174 | -11.24054 | -11.23855 | -11.23794 | -11.23494 |
| -11.23121 | -11.23055 | -11.23000 | -11.22953 | -11.22851 | -11.22780 |
| -11.20908 | -1.39729  | -1.26970  | -1.16516  | -1.14903  | -1.10607  |
| -1.03012  | -1.01871  | -1.01796  | -1.01270  | -0.96258  | -0.93279  |
| -0.85823  | -0.83900  | -0.83338  | -0.82172  | -0.79613  | -0.74121  |
| -0.71100  | -0.69502  | -0.67286  | -0.66435  | -0.64467  | -0.63756  |
| -0.62743  | -0.61493  | -0.61225  | -0.60861  | -0.59693  | -0.58329  |
| -0.57639  | -0.55346  | -0.54884  | -0.54068  | -0.53096  | -0.51904  |
| -0.51483  | -0.50724  | -0.50111  | -0.49778  | -0.48458  | -0.46869  |
| -0.46290  | -0.42163  | -0.41155  | -0.34266  | -0.33292  | -0.32298  |
| -0.30210  | 0.12929   | 0.13404   | 0.14443   | 0.15223   | 0.20384   |
| 0.22972   | 0.24095   | 0.24891   | 0.26128   | 0.28802   |           |

end of program scf

start of program derla  
end of program derla

start of program rwr  
end of program rwr

start of program der1b

forces (hartrees/bohr) : total

| atom  | label | x             | y             | z             |
|-------|-------|---------------|---------------|---------------|
| 1     | H1    | -2.562992E-05 | 4.768429E-05  | -5.437436E-05 |
| 2     | C1    | -1.009371E-05 | -3.789597E-05 | 6.328968E-05  |
| 3     | C2    | -1.554082E-05 | -8.805784E-05 | -3.004251E-05 |
| 4     | C3    | 2.037550E-05  | 4.671296E-05  | 1.839170E-04  |
| 5     | C4    | -2.313895E-05 | -1.037498E-05 | -5.935525E-05 |
| 6     | C5    | -1.603701E-05 | 1.971255E-05  | -8.542037E-07 |
| 7     | C6    | -5.149507E-05 | 3.838504E-05  | -1.939451E-04 |
| 8     | C7    | 4.762197E-05  | 1.142669E-04  | 3.875016E-05  |
| 9     | H3    | -4.685806E-05 | 1.042584E-04  | -7.557016E-05 |
| 10    | H4    | -3.767657E-05 | 1.036683E-04  | -3.812976E-06 |
| 11    | H6    | -1.364980E-05 | 3.053078E-05  | 4.632092E-05  |
| 12    | C16   | -3.612585E-05 | 2.953732E-04  | 8.776485E-05  |
| 13    | C8    | -1.510165E-04 | -4.746715E-05 | -3.961850E-05 |
| 14    | N2    | -1.997635E-05 | -4.313210E-04 | 2.279572E-04  |
| 15    | C9    | 3.370634E-06  | 4.633911E-05  | -1.005992E-04 |
| 16    | C10   | -4.035891E-05 | -2.011830E-04 | 7.246247E-05  |
| 17    | O1    | -3.805300E-05 | 4.085369E-04  | -1.572180E-04 |
| 18    | C23   | -4.302758E-05 | 5.862178E-05  | -1.710521E-05 |
| 19    | C18   | 1.202718E-04  | 8.888050E-06  | 2.477044E-05  |
| 20    | C19   | 9.469438E-05  | -4.470146E-05 | -6.208727E-05 |
| 21    | C20   | 5.790482E-05  | 3.445663E-04  | 3.855048E-04  |
| 22    | C21   | 1.011344E-04  | 1.298277E-04  | 2.624729E-04  |
| 23    | C22   | -1.575061E-04 | 5.401534E-05  | -4.751537E-05 |
| 24    | H2    | -2.273267E-04 | -5.883771E-05 | -2.228345E-04 |
| 25    | H5    | -3.541218E-06 | -2.619689E-04 | -2.245003E-04 |
| 26    | H7    | -9.864508E-05 | -2.780676E-05 | -1.964737E-05 |
| 27    | H8    | -3.001095E-05 | -4.691237E-05 | -2.363508E-04 |
| 28    | H9    | -1.505870E-05 | -6.483817E-06 | -3.438453E-05 |
| 29    | H10   | -7.305589E-05 | -4.458270E-06 | -3.547612E-05 |
| 30    | H19   | -3.954433E-07 | -1.816276E-07 | -7.264602E-06 |
| 31    | H20   | -1.282365E-05 | 2.928371E-05  | -3.191699E-05 |
| 32    | H21   | -5.220631E-05 | 5.009572E-06  | 3.820078E-05  |
| 33    | H22   | 1.406335E-05  | -3.918633E-06 | -1.449447E-05 |
| 34    | H11   | 9.569794E-05  | 1.382193E-04  | 1.669425E-05  |
| 35    | H12   | -2.495846E-05 | 2.094196E-04  | -6.765888E-05 |
| 36    | H13   | -4.102502E-05 | 6.368358E-05  | -6.809803E-06 |
| total |       | -7.500968E-04 | 1.025434E-03  | -2.953311E-04 |

end of program der1b

start of program geopt 40

geometry optimization step 40

reading input hessian of dimension 108  
in five columns format  
reading input hessian of dimension 108  
in five columns format

Level shifts adjusted to satisfy step-size constraints

Step size: 0.0102680  
Cos(theta): 0.7316907

Final level shift: -6.7963341E-02

energy change: 9.7616E-06 \* ( 5.0000E-05 )  
gradient maximum: 8.7075E-04 . ( 4.5000E-04 )  
gradient rms: 1.7040E-04 \* ( 3.0000E-04 )  
step size: 0.01027 trust radius: 0.01000  
displacement maximum: 5.9074E-03 . ( 1.8000E-03 )  
displacement rms: 9.2962E-04 \* ( 1.2000E-03 )  
predicted energy change: -1.0653E-05 geom step: 1.0268E-  
02 full step: 1.0268E-02  
molecular structure not yet converged...

center of mass moved by:

x: 6.9144E-08 y: 4.6027E-04 z: -3.8823E-05

new geometry:

|      | angstroms     |               |               |
|------|---------------|---------------|---------------|
| atom | x             | y             | z             |
| H1   | -1.1805335361 | 1.8877177032  | -2.2326900447 |
| C1   | -1.0989413761 | 2.1206477583  | -1.1845471450 |
| C2   | -0.8858702548 | 2.6958444450  | 1.5031177762  |
| C3   | -0.8786978569 | 1.0872031151  | -0.2891875535 |
| C4   | -1.2058110018 | 3.4349959755  | -0.7610442619 |
| C5   | -1.0997845571 | 3.7145544921  | 0.5890755078  |
| C6   | -0.7678197764 | 1.3781930832  | 1.0722442862  |
| C7   | -0.7862406321 | -0.3521354376 | -0.7565307288 |
| H3   | -1.3722551693 | 4.2232857581  | -1.4730731250 |
| H4   | -1.1876864256 | 4.7269806895  | 0.9421773897  |
| H6   | -0.8182471882 | 2.9341741294  | 2.5467965553  |
| C16  | 0.6135056875  | -0.7637827925 | -1.2107322145 |
| C8   | -1.3970642415 | -1.2500474689 | 0.3423772349  |
| N2   | -0.5091423997 | 0.3386125970  | 1.9932197827  |
| C9   | -0.7812691256 | -0.9761705188 | 1.7046116841  |
| C10  | 0.0102592893  | 0.6562561850  | 3.3155832988  |
| O1   | -0.5798386170 | -1.8495955228 | 2.5002490637  |
| C23  | -1.3856762090 | -2.7418101192 | 0.0238340609  |
| C18  | 3.1406210180  | -1.5866317700 | -2.0930786786 |
| C19  | 0.7615069768  | -1.4796007199 | -2.3942477003 |
| C20  | 1.7592605136  | -0.4570917337 | -0.4804324652 |



|     |               |               |               |
|-----|---------------|---------------|---------------|
| C21 | 3.0084210909  | -0.8676329823 | -0.9148885438 |
| C22 | 2.0110729907  | -1.8891394500 | -2.8341545981 |
| H2  | -0.1086863136 | -1.7225574593 | -2.9807779579 |
| H5  | 1.6829835578  | 0.1093993201  | 0.4284382373  |
| H7  | 3.8795672188  | -0.6220483550 | -0.3331545825 |
| H8  | 2.0984951984  | -2.4415119632 | -3.7538068850 |
| H9  | 4.1122636035  | -1.9025835229 | -2.4299831999 |
| H10 | -1.4327934370 | -0.4534479685 | -1.6219331402 |
| H19 | -0.3757025633 | -3.1283877781 | -0.0213372987 |
| H20 | -1.8648899950 | -2.9201142325 | -0.9342981171 |
| H21 | -1.9194687138 | -3.2936030001 | 0.7857735821  |
| H22 | -2.4343392319 | -0.9269350977 | 0.4401755313  |
| H11 | 0.8098205086  | 1.3820355823  | 3.2292636056  |
| H12 | 0.3904122578  | -0.2493428454 | 3.7549612324  |
| H13 | -0.7640683520 | 1.0589051653  | 3.9612496031  |

nuclear repulsion energy..... 1414.896243065 hartrees

-----  
 / end of geometry optimization iteration 40 /  
 -----

end of program geopt

start of program onee  
 smallest eigenvalue of S: 3.334E-04  
 number of canonical orbitals..... 368  
 end of program onee

start of program probe  
 end of program probe

start of program grid

| number of gridpoints: |     |     |     |     |     |     |     |
|-----------------------|-----|-----|-----|-----|-----|-----|-----|
| atom                  | H1  | C1  | C2  | C3  | C4  | C5  | C6  |
| C7                    |     |     |     |     |     |     |     |
| grid # 1              | 72  | 87  | 89  | 90  | 89  | 88  | 84  |
| 81                    |     |     |     |     |     |     |     |
| grid # 2              | 116 | 97  | 96  | 98  | 97  | 97  | 94  |
| 90                    |     |     |     |     |     |     |     |
| grid # 3              | 217 | 182 | 184 | 194 | 183 | 184 | 189 |
| 177                   |     |     |     |     |     |     |     |
| grid # 4              | 216 | 326 | 328 | 338 | 328 | 328 | 323 |
| 314                   |     |     |     |     |     |     |     |

| number of gridpoints: |    |    |    |     |    |    |    |
|-----------------------|----|----|----|-----|----|----|----|
| atom                  | H3 | H4 | H6 | C16 | C8 | N2 | C9 |
| C10                   |    |    |    |     |    |    |    |

|     |          |     |     |     |     |     |     |     |
|-----|----------|-----|-----|-----|-----|-----|-----|-----|
| 69  | grid # 1 | 73  | 73  | 70  | 92  | 82  | 95  | 82  |
| 78  | grid # 2 | 118 | 118 | 112 | 100 | 90  | 105 | 92  |
| 146 | grid # 3 | 223 | 223 | 207 | 194 | 174 | 211 | 176 |
| 276 | grid # 4 | 224 | 223 | 208 | 342 | 311 | 387 | 293 |

number of gridpoints:

|     |          |     |     |     |     |     |     |     |
|-----|----------|-----|-----|-----|-----|-----|-----|-----|
| H2  | atom     | O1  | C23 | C18 | C19 | C20 | C21 | C22 |
| 71  | grid # 1 | 111 | 74  | 89  | 88  | 88  | 89  | 89  |
| 112 | grid # 2 | 123 | 80  | 97  | 95  | 96  | 97  | 96  |
| 212 | grid # 3 | 257 | 150 | 183 | 183 | 182 | 184 | 183 |
| 211 | grid # 4 | 450 | 285 | 327 | 326 | 327 | 327 | 327 |

number of gridpoints:

|     |          |     |     |     |     |     |     |     |
|-----|----------|-----|-----|-----|-----|-----|-----|-----|
| H21 | atom     | H5  | H7  | H8  | H9  | H10 | H19 | H20 |
| 70  | grid # 1 | 71  | 73  | 73  | 73  | 66  | 71  | 71  |
| 108 | grid # 2 | 111 | 118 | 118 | 118 | 106 | 108 | 110 |
| 217 | grid # 3 | 212 | 223 | 223 | 224 | 202 | 218 | 216 |
| 215 | grid # 4 | 207 | 223 | 224 | 224 | 196 | 212 | 216 |

number of gridpoints:

|  |          |     |     |     |     |       |
|--|----------|-----|-----|-----|-----|-------|
|  | atom     | H22 | H11 | H12 | H13 | total |
|  | grid # 1 | 69  | 71  | 70  | 71  | 2864  |
|  | grid # 2 | 110 | 109 | 108 | 111 | 3729  |
|  | grid # 3 | 214 | 213 | 212 | 217 | 7189  |
|  | grid # 4 | 211 | 211 | 209 | 218 | 9911  |

end of program grid

start of program rwr  
end of program rwr

start of program scf

|   |   |   |   |   |        |         |         |
|---|---|---|---|---|--------|---------|---------|
| i | u | d | i | g |        |         |         |
| t | p | i | c | r |        | RMS     | maximum |
| e | d | i | u | i | energy | density | DIIS    |

|      | r | t | s | t | d | total energy     | change   | change  | error   |
|------|---|---|---|---|---|------------------|----------|---------|---------|
| etot | 1 | N | N | 1 | U | -783.03313505465 |          | 2.5E-05 | 1.3E-03 |
| etot | 2 | Y | Y | 4 | M | -783.03324085548 | 1.1E-04  | 1.2E-05 | 5.3E-04 |
| etot | 3 | Y | Y | 4 | M | -783.03325810499 | 1.7E-05  | 3.7E-06 | 1.3E-04 |
| etot | 4 | Y | N | 4 | M | -783.03325674898 | -1.4E-06 | 0.0E+00 | 0.0E+00 |

Energy components, in hartrees:

|     |                               |                   |       |
|-----|-------------------------------|-------------------|-------|
| (A) | Nuclear repulsion.....        | 1414.89624306538  |       |
| (E) | Total one-electron terms..... | -3874.36616452129 |       |
| (I) | Total two-electron terms..... | 1676.43666470692  |       |
| (L) | Electronic energy.....        | -2197.92949981436 | (E+I) |
| (N) | Total energy.....             | -783.03325674898  | (A+L) |

SCFE: SCF energy: HF -783.03325674898 hartrees iterations:  
4

HOMO energy: -0.30203  
LUMO energy: 0.12928

Orbital energies:

|           |           |           |           |           |           |
|-----------|-----------|-----------|-----------|-----------|-----------|
| -20.52692 | -15.60009 | -11.34578 | -11.28574 | -11.25660 | -11.24981 |
| -11.24296 | -11.24133 | -11.24052 | -11.23872 | -11.23790 | -11.23493 |
| -11.23148 | -11.23061 | -11.23017 | -11.22982 | -11.22870 | -11.22760 |
| -11.20917 | -1.39749  | -1.26944  | -1.16499  | -1.14892  | -1.10595  |
| -1.03000  | -1.01861  | -1.01779  | -1.01270  | -0.96255  | -0.93266  |
| -0.85808  | -0.83891  | -0.83326  | -0.82165  | -0.79604  | -0.74108  |
| -0.71093  | -0.69497  | -0.67281  | -0.66427  | -0.64458  | -0.63752  |
| -0.62742  | -0.61486  | -0.61224  | -0.60847  | -0.59691  | -0.58336  |
| -0.57624  | -0.55338  | -0.54873  | -0.54064  | -0.53098  | -0.51904  |
| -0.51487  | -0.50717  | -0.50097  | -0.49774  | -0.48457  | -0.46861  |
| -0.46284  | -0.42149  | -0.41149  | -0.34253  | -0.33295  | -0.32283  |
| -0.30203  | 0.12928   | 0.13401   | 0.14451   | 0.15235   | 0.20400   |
| 0.22968   | 0.24104   | 0.24884   | 0.26136   | 0.28825   |           |

end of program scf

start of program derla  
end of program derla

start of program rwr  
end of program rwr

start of program derlb

forces (hartrees/bohr) : total

| atom  | label | x             | y             | z             |
|-------|-------|---------------|---------------|---------------|
| 1     | H1    | -1.393421E-05 | 1.495904E-05  | 3.624136E-05  |
| 2     | C1    | -2.993544E-05 | 1.042517E-04  | -8.034008E-05 |
| 3     | C2    | -4.965037E-05 | 1.428792E-04  | 1.491431E-05  |
| 4     | C3    | -4.266436E-05 | 1.379320E-05  | -2.074520E-04 |
| 5     | C4    | -1.895811E-05 | 6.824643E-05  | 4.017110E-05  |
| 6     | C5    | -2.147496E-05 | 4.228074E-05  | -1.157916E-05 |
| 7     | C6    | 4.152878E-05  | 3.676471E-05  | 1.582159E-04  |
| 8     | C7    | -1.053052E-04 | -6.140876E-05 | -5.305938E-05 |
| 9     | H3    | 6.540027E-06  | -4.182934E-05 | 5.896687E-05  |
| 10    | H4    | -2.895909E-06 | -4.363394E-05 | -1.196816E-05 |
| 11    | H6    | -3.354574E-05 | 3.107920E-05  | -6.340310E-05 |
| 12    | C16   | -1.525843E-05 | -2.419853E-04 | -8.257592E-05 |
| 13    | C8    | 1.261373E-04  | 1.101140E-04  | 1.924357E-05  |
| 14    | N2    | -5.103716E-05 | 4.892301E-04  | -2.566227E-04 |
| 15    | C9    | -6.899764E-05 | 2.376007E-05  | 9.216899E-05  |
| 16    | C10   | 1.042331E-05  | 2.113738E-04  | -5.609563E-05 |
| 17    | O1    | -1.396245E-06 | -3.449606E-04 | 1.541131E-04  |
| 18    | C23   | 5.081856E-06  | 3.565355E-06  | -8.253708E-06 |
| 19    | C18   | -1.446029E-04 | 4.989481E-05  | -4.088218E-05 |
| 20    | C19   | -1.428463E-04 | 1.096594E-04  | 3.763468E-05  |
| 21    | C20   | -1.053055E-04 | -2.718897E-04 | -3.869824E-04 |
| 22    | C21   | -1.340657E-04 | -6.189925E-05 | -2.699845E-04 |
| 23    | C22   | 1.132563E-04  | 3.399720E-06  | 2.487180E-05  |
| 24    | H2    | 1.796122E-04  | 1.204883E-04  | 1.954416E-04  |
| 25    | H5    | -3.544587E-05 | 3.133785E-04  | 2.036240E-04  |
| 26    | H7    | 6.075275E-05  | 8.086912E-05  | 1.107105E-05  |
| 27    | H8    | -1.038044E-05 | 9.902074E-05  | 2.037797E-04  |
| 28    | H9    | -2.482317E-05 | 6.428656E-05  | 1.744572E-05  |
| 29    | H10   | 3.609239E-05  | 6.434611E-05  | 1.485271E-05  |
| 30    | H19   | -4.190547E-05 | 5.773811E-05  | -9.413444E-06 |
| 31    | H20   | -3.163223E-05 | 3.067309E-05  | 1.123170E-05  |
| 32    | H21   | 5.133330E-06  | 4.944988E-05  | -5.413174E-05 |
| 33    | H22   | -6.274101E-05 | 6.191068E-05  | -2.267721E-06 |
| 34    | H11   | -1.612747E-04 | -6.414317E-05 | -3.065062E-05 |
| 35    | H12   | -6.744612E-06 | -1.456896E-04 | 5.326628E-05  |
| 36    | H13   | 3.049344E-05  | -1.928691E-05 | -1.409492E-05 |
| total |       | -7.417701E-04 | 1.100686E-03  | -2.925029E-04 |

end of program derlb

start of program geopt 41

geometry optimization step 41

reading input hessian of dimension 108

in five columns format

reading input hessian of dimension 108

in five columns format

Level shifts adjusted to satisfy step-size constraints

Step size: 0.0101777

Cos(theta): 0.7147691

Final level shift: -6.1593040E-02

energy change: -9.9032E-06 \* ( 5.0000E-05 )

gradient maximum: 8.5287E-04 . ( 4.5000E-04 )

gradient rms: 1.6624E-04 \* ( 3.0000E-04 )

step size: 0.01018 trust radius: 0.01000

displacement maximum: 5.8838E-03 . ( 1.8000E-03 )

displacement rms: 9.2145E-04 \* ( 1.2000E-03 )

predicted energy change: -9.8689E-06 geom step: 1.0178E-

02 full step: 1.0178E-02

molecular structure not yet converged...

center of mass moved by:

x: -3.3058E-05 y: -4.4784E-04 z: 5.3437E-05

new geometry:

|      | angstroms     |               |               |
|------|---------------|---------------|---------------|
| atom | x             | y             | z             |
| H1   | -1.1779194569 | 1.8889190743  | -2.2325450547 |
| C1   | -1.0965597414 | 2.1213224656  | -1.1843436975 |
| C2   | -0.8842826501 | 2.6953080188  | 1.5039180805  |
| C3   | -0.8779893517 | 1.0871839076  | -0.2894104033 |
| C4   | -1.2020389484 | 3.4355922621  | -0.7600223844 |
| C5   | -1.0964785719 | 3.7145197498  | 0.5902041193  |
| C6   | -0.7673508929 | 1.3777139443  | 1.0724718383  |
| C7   | -0.7864953099 | -0.3524133302 | -0.7566952418 |
| H3   | -1.3669792349 | 4.2243277534  | -1.4716328280 |
| H4   | -1.1832694477 | 4.7267565406  | 0.9437783582  |
| H6   | -0.8170796761 | 2.9332465482  | 2.5476093782  |
| C16  | 0.6132581946  | -0.7650148349 | -1.2102809781 |
| C8   | -1.3981527064 | -1.2497582811 | 0.3421041590  |
| N2   | -0.5101315530 | 0.3378017092  | 1.9930531716  |
| C9   | -0.7831069091 | -0.9772737844 | 1.7048025276  |
| C10  | 0.0081587989  | 0.6533380860  | 3.3163582796  |
| O1   | -0.5832439836 | -1.8518648168 | 2.5000584053  |
| C23  | -1.3883345260 | -2.7414971700 | 0.0228419317  |
| C18  | 3.1413473127  | -1.5836004707 | -2.0940117441 |
| C19  | 0.7612969520  | -1.4867798452 | -2.3895098609 |
| C20  | 1.7595811743  | -0.4492812678 | -0.4854930170 |
| C21  | 3.0091495209  | -0.8574472014 | -0.9206550894 |
| C22  | 2.0112248403  | -1.8949897207 | -2.8297283011 |
| H2   | -0.1090233117 | -1.7349294510 | -2.9723045158 |
| H5   | 1.6838780835  | 0.1260013018  | 0.4188598558  |
| H7   | 3.8811023209  | -0.6038680701 | -0.3431119147 |
| H8   | 2.0985088614  | -2.4528051787 | -3.7454869236 |
| H9   | 4.1135383329  | -1.8975200913 | -2.4311995176 |
| H10  | -1.4324139127 | -0.4529636013 | -1.6225103797 |

|     |               |               |               |
|-----|---------------|---------------|---------------|
| H19 | -0.3787505034 | -3.1286191478 | -0.0238576683 |
| H20 | -1.8691834224 | -2.9191671428 | -0.9345758210 |
| H21 | -1.9214163230 | -3.2931984611 | 0.7851654438  |
| H22 | -2.4352878148 | -0.9255769366 | 0.4396277133  |
| H11 | 0.8081898220  | 1.3781404188  | 3.2316877391  |
| H12 | 0.3865268617  | -0.2539622335 | 3.7549876177  |
| H13 | -0.7662801158 | 1.0555260192  | 3.9620788991  |

nuclear repulsion energy..... 1414.891433463 hartrees

-----  
 / end of geometry optimization iteration 41 /  
 -----

end of program geopt

start of program onee  
 smallest eigenvalue of S: 3.335E-04  
 number of canonical orbitals..... 368  
 end of program onee

start of program probe  
 end of program probe

start of program grid

number of gridpoints:

| atom     | H1  | C1  | C2  | C3  | C4  | C5  | C6  |
|----------|-----|-----|-----|-----|-----|-----|-----|
| C7       |     |     |     |     |     |     |     |
| grid # 1 | 72  | 87  | 89  | 89  | 89  | 88  | 83  |
| 81       |     |     |     |     |     |     |     |
| grid # 2 | 116 | 97  | 96  | 98  | 97  | 97  | 95  |
| 90       |     |     |     |     |     |     |     |
| grid # 3 | 217 | 182 | 184 | 194 | 183 | 184 | 189 |
| 177      |     |     |     |     |     |     |     |
| grid # 4 | 216 | 326 | 328 | 338 | 328 | 328 | 326 |
| 314      |     |     |     |     |     |     |     |

number of gridpoints:

| atom     | H3  | H4  | H6  | C16 | C8  | N2  | C9  |
|----------|-----|-----|-----|-----|-----|-----|-----|
| C10      |     |     |     |     |     |     |     |
| grid # 1 | 73  | 73  | 70  | 92  | 82  | 95  | 82  |
| 70       |     |     |     |     |     |     |     |
| grid # 2 | 118 | 118 | 112 | 100 | 90  | 105 | 92  |
| 79       |     |     |     |     |     |     |     |
| grid # 3 | 223 | 223 | 207 | 194 | 174 | 211 | 176 |
| 143      |     |     |     |     |     |     |     |
| grid # 4 | 224 | 223 | 208 | 342 | 311 | 387 | 293 |
| 273      |     |     |     |     |     |     |     |

```

number of gridpoints:
  atom      01      C23      C18      C19      C20      C21      C22
H2
  grid # 1      111      74      89      88      88      89      89
71
  grid # 2      123      79      97      95      96      97      96
112
  grid # 3      257      149      183      183      182      184      183
212
  grid # 4      450      286      327      326      327      327      327
211

```

```

number of gridpoints:
  atom      H5      H7      H8      H9      H10      H19      H20
H21
  grid # 1      71      73      73      73      66      71      71
70
  grid # 2      111      118      118      118      106      108      110
108
  grid # 3      212      223      223      224      203      218      217
217
  grid # 4      207      223      224      224      196      212      216
215

```

```

number of gridpoints:
  atom      H22      H11      H12      H13      total
grid # 1      69      71      70      71      2863
grid # 2      110      109      107      111      3729
grid # 3      214      214      212      217      7188
grid # 4      211      211      209      218      9912

```

end of program grid

start of program rwr  
end of program rwr

start of program scf

|      | i | u | d | i | g |                  | energy  | RMS     | maximum |
|------|---|---|---|---|---|------------------|---------|---------|---------|
|      | t | p | i | c | r |                  | change  | density | DIIS    |
|      | e | d | i | u | i | total energy     |         | change  | error   |
|      | r | t | s | t | d |                  |         |         |         |
| etot | 1 | N | N | 1 | U | -783.03313014867 |         | 2.6E-05 | 1.3E-03 |
| etot | 2 | Y | Y | 4 | M | -783.03323324161 | 1.0E-04 | 1.2E-05 | 5.4E-04 |
| etot | 3 | Y | Y | 4 | M | -783.03324631058 | 1.3E-05 | 3.7E-06 | 1.3E-04 |
| etot | 4 | Y | N | 4 | M | -783.03325020781 | 3.9E-06 | 0.0E+00 | 0.0E+00 |

Energy components, in hartrees:

(A) Nuclear repulsion..... 1414.89143346315  
 (E) Total one-electron terms..... -3874.34758542581  
 (I) Total two-electron terms..... 1676.42290175486  
 (L) Electronic energy..... -2197.92468367096 (E+I)  
 (N) Total energy..... -783.03325020781 (A+L)

SCFE: SCF energy: HF -783.03325020781 hartrees iterations:  
 4

HOMO energy: -0.30210  
 LUMO energy: 0.12929

Orbital energies:

|           |           |           |           |           |           |
|-----------|-----------|-----------|-----------|-----------|-----------|
| -20.52663 | -15.60058 | -11.34618 | -11.28619 | -11.25659 | -11.25010 |
| -11.24315 | -11.24174 | -11.24055 | -11.23855 | -11.23794 | -11.23494 |
| -11.23121 | -11.23056 | -11.23000 | -11.22954 | -11.22851 | -11.22781 |
| -11.20909 | -1.39729  | -1.26969  | -1.16517  | -1.14903  | -1.10607  |
| -1.03012  | -1.01871  | -1.01796  | -1.01270  | -0.96257  | -0.93279  |
| -0.85823  | -0.83900  | -0.83338  | -0.82172  | -0.79613  | -0.74121  |
| -0.71100  | -0.69502  | -0.67286  | -0.66436  | -0.64467  | -0.63756  |
| -0.62743  | -0.61493  | -0.61225  | -0.60860  | -0.59693  | -0.58330  |
| -0.57639  | -0.55347  | -0.54884  | -0.54068  | -0.53096  | -0.51904  |
| -0.51483  | -0.50724  | -0.50111  | -0.49778  | -0.48458  | -0.46869  |
| -0.46290  | -0.42162  | -0.41155  | -0.34266  | -0.33292  | -0.32298  |
| -0.30210  | 0.12929   | 0.13404   | 0.14443   | 0.15223   | 0.20387   |
| 0.22972   | 0.24095   | 0.24892   | 0.26128   | 0.28804   |           |

end of program scf

start of program derla  
 end of program derla

start of program rwr  
 end of program rwr

start of program der1b

forces (hartrees/bohr) : total

| atom | label | x             | y             | z             |
|------|-------|---------------|---------------|---------------|
| 1    | H1    | -2.589628E-05 | 4.771375E-05  | -5.422353E-05 |
| 2    | C1    | -9.844688E-06 | -3.950029E-05 | 6.371030E-05  |
| 3    | C2    | -1.324931E-05 | -8.698254E-05 | -2.966539E-05 |
| 4    | C3    | 2.042670E-05  | 4.755193E-05  | 1.841441E-04  |
| 5    | C4    | -2.303785E-05 | -9.507382E-06 | -5.876744E-05 |
| 6    | C5    | -1.637066E-05 | 1.989334E-05  | -1.285701E-06 |
| 7    | C6    | -5.338211E-05 | 3.509113E-05  | -1.922205E-04 |



|       |       |               |               |               |
|-------|-------|---------------|---------------|---------------|
| 8     | C7    | 3.810672E-05  | 1.082191E-04  | 4.296461E-05  |
| 9     | H3    | -4.695844E-05 | 1.045048E-04  | -7.560364E-05 |
| 10    | H4    | -3.782441E-05 | 1.039499E-04  | -3.542282E-06 |
| 11    | H6    | -1.315311E-05 | 3.027402E-05  | 4.667190E-05  |
| 12    | C16   | -2.584165E-05 | 2.906123E-04  | 7.882361E-05  |
| 13    | C8    | -1.552032E-04 | -4.224373E-05 | -3.919689E-05 |
| 14    | N2    | -1.892933E-05 | -4.367407E-04 | 2.256161E-04  |
| 15    | C9    | 5.147190E-06  | 4.613714E-05  | -9.946703E-05 |
| 16    | C10   | -4.207567E-05 | -1.980349E-04 | 6.908777E-05  |
| 17    | O1    | -3.746568E-05 | 4.123184E-04  | -1.609230E-04 |
| 18    | C23   | -4.134224E-05 | 5.757862E-05  | -1.548210E-05 |
| 19    | C18   | 1.172188E-04  | 7.128067E-06  | 2.400170E-05  |
| 20    | C19   | 9.709640E-05  | -4.428564E-05 | -6.046110E-05 |
| 21    | C20   | 6.059363E-05  | 3.441373E-04  | 3.878179E-04  |
| 22    | C21   | 1.004934E-04  | 1.318370E-04  | 2.636001E-04  |
| 23    | C22   | -1.577278E-04 | 5.573230E-05  | -4.772553E-05 |
| 24    | H2    | -2.273518E-04 | -5.907989E-05 | -2.220542E-04 |
| 25    | H5    | -4.242219E-06 | -2.619764E-04 | -2.242762E-04 |
| 26    | H7    | -1.000372E-04 | -2.785027E-05 | -2.043161E-05 |
| 27    | H8    | -2.996361E-05 | -4.694047E-05 | -2.357157E-04 |
| 28    | H9    | -1.545821E-05 | -6.476687E-06 | -3.449483E-05 |
| 29    | H10   | -7.195446E-05 | -4.394553E-06 | -3.307921E-05 |
| 30    | H19   | -2.023906E-06 | 7.461956E-07  | -7.124757E-06 |
| 31    | H20   | -1.308576E-05 | 2.876695E-05  | -3.191347E-05 |
| 32    | H21   | -5.101382E-05 | 6.412169E-06  | 3.643457E-05  |
| 33    | H22   | 1.587493E-05  | -5.279562E-06 | -1.408004E-05 |
| 34    | H11   | 9.868093E-05  | 1.375884E-04  | 1.743532E-05  |
| 35    | H12   | -2.655831E-05 | 2.086310E-04  | -6.739582E-05 |
| 36    | H13   | -4.381953E-05 | 6.539100E-05  | -4.852382E-06 |
| ----- |       | -----         | -----         | -----         |
|       | total | -7.501726E-04 | 1.020922E-03  | -2.936745E-04 |

end of program der1b

start of program geopt 42

geometry optimization step 42

reading input hessian of dimension 108

in five columns format

reading input hessian of dimension 108

in five columns format

Level shifts adjusted to satisfy step-size constraints

Step size: 0.0102660

Cos(theta): 0.7310363

Final level shift: -6.7884585E-02

energy change: 6.5412E-06 \* ( 5.0000E-05 )

gradient maximum: 8.6717E-04 . ( 4.5000E-04 )

S485

gradient rms: 1.7027E-04 \* ( 3.0000E-04 )  
 step size: 0.01027 trust radius: 0.01000  
 displacement maximum: 5.9225E-03 . ( 1.8000E-03 )  
 displacement rms: 9.2944E-04 \* ( 1.2000E-03 )  
 predicted energy change: -1.0635E-05 geom step: 1.0266E-02  
 full step: 1.0266E-02  
 molecular structure not yet converged...

center of mass moved by:  
 x: 7.6995E-06 y: 4.5947E-04 z: -4.2645E-05

new geometry:

|      | angstroms     |               |               |
|------|---------------|---------------|---------------|
| atom | x             | y             | z             |
| H1   | -1.1804954383 | 1.8877686372  | -2.2327238316 |
| C1   | -1.0989286409 | 2.1206826120  | -1.1845750941 |
| C2   | -0.8859965485 | 2.6958501052  | 1.5031121659  |
| C3   | -0.8786443741 | 1.0872368669  | -0.2892253927 |
| C4   | -1.2058874151 | 3.4350187076  | -0.7610504837 |
| C5   | -1.0999446927 | 3.7145635099  | 0.5890799535  |
| C6   | -0.7677984036 | 1.3782233034  | 1.0722080781  |
| C7   | -0.7862046541 | -0.3521151090 | -0.7565488782 |
| H3   | -1.3723605638 | 4.2233097812  | -1.4730718021 |
| H4   | -1.1879531856 | 4.7269758944  | 0.9421945900  |
| H6   | -0.8184734365 | 2.9341483845  | 2.5468071062  |
| C16  | 0.6135572005  | -0.7638109870 | -1.2107091962 |
| C8   | -1.3971113730 | -1.2499858765 | 0.3423438881  |
| N2   | -0.5090720355 | 0.3386321658  | 1.9931573014  |
| C9   | -0.7813527639 | -0.9761209362 | 1.7045983945  |
| C10  | 0.0105388121  | 0.6561991201  | 3.3154660142  |
| O1   | -0.5800221869 | -1.8495261394 | 2.5002844554  |
| C23  | -1.3857548262 | -2.7417514779 | 0.0238125673  |
| C18  | 3.1406680078  | -1.5867303924 | -2.0929843515 |
| C19  | 0.7615690602  | -1.4796081880 | -2.3942334053 |
| C20  | 1.7592955116  | -0.4571697483 | -0.4803589005 |
| C21  | 3.0084550290  | -0.8677461983 | -0.9147813496 |
| C22  | 2.0111354118  | -1.8891806580 | -2.8341095882 |
| H2   | -0.1086155435 | -1.7225132353 | -2.9807972799 |
| H5   | 1.6830031559  | 0.1093135617  | 0.4285132672  |
| H7   | 3.8795917435  | -0.6222097445 | -0.3330114700 |
| H8   | 2.0985712390  | -2.4415321630 | -3.7537756779 |
| H9   | 4.1123113992  | -1.9027085757 | -2.4298633879 |
| H10  | -1.4327205900 | -0.4534136254 | -1.6219759793 |
| H19  | -0.3757937583 | -3.1283591353 | -0.0213216581 |
| H20  | -1.8649477050 | -2.9200541103 | -0.9343312877 |
| H21  | -1.9195871742 | -3.2935191061 | 0.7857403682  |
| H22  | -2.4343803473 | -0.9268441244 | 0.4400975996  |
| H11  | 0.8097161484  | 1.3823854113  | 3.2290766885  |
| H12  | 0.3912560463  | -0.2493193963 | 3.7545311353  |
| H13  | -0.7637770712 | 1.0583244321  | 3.9614700437  |

nuclear repulsion energy..... 1414.894938254 hartrees

-----  
/ end of geometry optimization iteration 42 /  
-----

end of program geopt

start of program onee  
smallest eigenvalue of S: 3.334E-04  
number of canonical orbitals..... 368  
end of program onee

start of program probe  
end of program probe

start of program grid

number of gridpoints:  
atom H1 C1 C2 C3 C4 C5 C6  
C7  
grid # 1 72 87 89 90 89 88 84  
81  
grid # 2 116 97 96 98 97 97 94  
90  
grid # 3 217 182 184 194 183 184 189  
177  
grid # 4 216 326 328 338 328 328 323  
314

number of gridpoints:  
atom H3 H4 H6 C16 C8 N2 C9  
C10  
grid # 1 73 73 70 92 82 95 82  
69  
grid # 2 118 118 112 100 90 105 92  
78  
grid # 3 223 223 207 194 174 211 176  
146  
grid # 4 224 223 208 342 311 387 293  
276

number of gridpoints:  
atom O1 C23 C18 C19 C20 C21 C22  
H2  
grid # 1 111 74 89 88 88 89 89  
71  
grid # 2 123 80 97 95 96 97 96  
112  
grid # 3 257 150 183 183 182 184 183  
212

grid # 4      450      285      327      326      327      327      327  
 211

number of gridpoints:

| atom     | H5  | H7  | H8  | H9  | H10 | H19 | H20 |
|----------|-----|-----|-----|-----|-----|-----|-----|
| grid # 1 | 71  | 73  | 73  | 73  | 66  | 71  | 71  |
| grid # 2 | 111 | 118 | 118 | 118 | 106 | 108 | 110 |
| grid # 3 | 212 | 223 | 223 | 224 | 202 | 218 | 216 |
| grid # 4 | 207 | 223 | 224 | 224 | 196 | 212 | 216 |

number of gridpoints:

| atom     | H22 | H11 | H12 | H13 | total |
|----------|-----|-----|-----|-----|-------|
| grid # 1 | 69  | 71  | 70  | 71  | 2864  |
| grid # 2 | 110 | 109 | 108 | 111 | 3729  |
| grid # 3 | 214 | 213 | 212 | 217 | 7189  |
| grid # 4 | 211 | 211 | 209 | 218 | 9911  |

end of program grid

start of program rwr

end of program rwr

start of program scf

|      | i | u | d | i | g |                  | RMS      | maximum |
|------|---|---|---|---|---|------------------|----------|---------|
|      | t | p | i | c | r |                  | energy   | DIIS    |
|      | e | d | i | u | i | total energy     | density  | error   |
|      | r | t | s | t | d | change           | change   |         |
| etot | 1 | N | N | 1 | U | -783.03313494677 | 2.6E-05  | 1.3E-03 |
| etot | 2 | Y | Y | 4 | M | -783.03324005415 | 1.1E-04  | 5.3E-04 |
| etot | 3 | Y | Y | 4 | M | -783.03325689753 | 1.7E-05  | 1.3E-04 |
| etot | 4 | Y | N | 4 | M | -783.03325554068 | -1.4E-06 | 0.0E+00 |

Energy components, in hartrees:

|     |                               |                   |       |
|-----|-------------------------------|-------------------|-------|
| (A) | Nuclear repulsion.....        | 1414.89493825417  |       |
| (E) | Total one-electron terms..... | -3874.36360563108 |       |
| (I) | Total two-electron terms..... | 1676.43541183623  |       |
| (L) | Electronic energy.....        | -2197.92819379485 | (E+I) |
| (N) | Total energy.....             | -783.03325554068  | (A+L) |

SCFE: SCF energy: HF      -783.03325554068 hartrees      iterations:

4

HOMO energy: -0.30204  
LUMO energy: 0.12928

Orbital energies:

|           |           |           |           |           |           |
|-----------|-----------|-----------|-----------|-----------|-----------|
| -20.52691 | -15.60008 | -11.34578 | -11.28574 | -11.25660 | -11.24981 |
| -11.24296 | -11.24134 | -11.24052 | -11.23872 | -11.23790 | -11.23494 |
| -11.23148 | -11.23061 | -11.23017 | -11.22982 | -11.22870 | -11.22760 |
| -11.20917 | -1.39748  | -1.26944  | -1.16498  | -1.14892  | -1.10595  |
| -1.03000  | -1.01861  | -1.01779  | -1.01270  | -0.96255  | -0.93266  |
| -0.85808  | -0.83891  | -0.83326  | -0.82165  | -0.79604  | -0.74108  |
| -0.71093  | -0.69497  | -0.67281  | -0.66427  | -0.64458  | -0.63752  |
| -0.62742  | -0.61486  | -0.61224  | -0.60847  | -0.59690  | -0.58336  |
| -0.57624  | -0.55338  | -0.54873  | -0.54064  | -0.53098  | -0.51904  |
| -0.51487  | -0.50717  | -0.50097  | -0.49774  | -0.48457  | -0.46861  |
| -0.46284  | -0.42148  | -0.41148  | -0.34253  | -0.33295  | -0.32283  |
| -0.30204  | 0.12928   | 0.13401   | 0.14451   | 0.15235   | 0.20400   |
| 0.22968   | 0.24104   | 0.24885   | 0.26136   | 0.28825   |           |

end of program scf

start of program derla  
end of program derla

start of program rwr  
end of program rwr

start of program derlb

forces (hartrees/bohr) : total

| atom | label | x             | y             | z             |
|------|-------|---------------|---------------|---------------|
| 1    | H1    | -1.376191E-05 | 1.459492E-05  | 3.648699E-05  |
| 2    | C1    | -3.001596E-05 | 1.047948E-04  | -8.044564E-05 |
| 3    | C2    | -4.717440E-05 | 1.425771E-04  | 1.421861E-05  |
| 4    | C3    | -4.449984E-05 | 1.296302E-05  | -2.080757E-04 |
| 5    | C4    | -1.874635E-05 | 6.728239E-05  | 4.030130E-05  |
| 6    | C5    | -2.160847E-05 | 4.136742E-05  | -1.125257E-05 |
| 7    | C6    | 3.760471E-05  | 3.700220E-05  | 1.591218E-04  |
| 8    | C7    | -9.546494E-05 | -5.642248E-05 | -5.543236E-05 |
| 9    | H3    | 6.669959E-06  | -4.206098E-05 | 5.911224E-05  |
| 10   | H4    | -2.872196E-06 | -4.376410E-05 | -1.185424E-05 |
| 11   | H6    | -3.302341E-05 | 3.038630E-05  | -6.323548E-05 |
| 12   | C16   | -2.388683E-05 | -2.390854E-04 | -7.582299E-05 |
| 13   | C8    | 1.271983E-04  | 1.065346E-04  | 2.054815E-05  |
| 14   | N2    | -4.847264E-05 | 4.906421E-04  | -2.506701E-04 |
| 15   | C9    | -6.503284E-05 | 2.190193E-05  | 9.149241E-05  |
| 16   | C10   | 1.008071E-05  | 2.143463E-04  | -5.875587E-05 |

|       |       |               |               |               |
|-------|-------|---------------|---------------|---------------|
| 17    | O1    | -2.783975E-06 | -3.465013E-04 | 1.522603E-04  |
| 18    | C23   | 2.034168E-06  | 3.553391E-06  | -7.679801E-06 |
| 19    | C18   | -1.455053E-04 | 5.149661E-05  | -3.951323E-05 |
| 20    | C19   | -1.426453E-04 | 1.098225E-04  | 3.670533E-05  |
| 21    | C20   | -1.050125E-04 | -2.725328E-04 | -3.902726E-04 |
| 22    | C21   | -1.332752E-04 | -6.458291E-05 | -2.727378E-04 |
| 23    | C22   | 1.157918E-04  | 3.239593E-06  | 2.546653E-05  |
| 24    | H2    | 1.795483E-04  | 1.198461E-04  | 1.952215E-04  |
| 25    | H5    | -3.548134E-05 | 3.132271E-04  | 2.043913E-04  |
| 26    | H7    | 6.007185E-05  | 8.103000E-05  | 1.027594E-05  |
| 27    | H8    | -1.059481E-05 | 9.964200E-05  | 2.055442E-04  |
| 28    | H9    | -2.546998E-05 | 6.438353E-05  | 1.793658E-05  |
| 29    | H10   | 3.395041E-05  | 6.431989E-05  | 1.299952E-05  |
| 30    | H19   | -3.999623E-05 | 5.723742E-05  | -9.833149E-06 |
| 31    | H20   | -3.090805E-05 | 3.111391E-05  | 1.138996E-05  |
| 32    | H21   | 4.767729E-06  | 4.871563E-05  | -5.333217E-05 |
| 33    | H22   | -6.293372E-05 | 6.271088E-05  | -3.143072E-06 |
| 34    | H11   | -1.592426E-04 | -6.618768E-05 | -3.124284E-05 |
| 35    | H12   | -7.636060E-06 | -1.448433E-04 | 5.234877E-05  |
| 36    | H13   | 2.685978E-05  | -1.811813E-05 | -1.491355E-05 |
| ----- |       | -----         | -----         | -----         |
|       | total | -7.414670E-04 | 1.100633E-03  | -2.923918E-04 |

end of program derlb

start of program geopt 43

geometry optimization step 43

reading input hessian of dimension 108  
in five columns format  
reading input hessian of dimension 108  
in five columns format

Level shifts adjusted to satisfy step-size constraints

Step size: 0.0101815  
Cos(theta): 0.7152035

Final level shift: -6.1840964E-02

energy change: -5.3329E-06 \* ( 5.0000E-05 )  
gradient maximum: 8.5252E-04 . ( 4.5000E-04 )  
gradient rms: 1.6624E-04 \* ( 3.0000E-04 )  
step size: 0.01018 trust radius: 0.01000  
displacement maximum: 5.8894E-03 . ( 1.8000E-03 )  
displacement rms: 9.2179E-04 \* ( 1.2000E-03 )  
predicted energy change: -9.8905E-06 geom step: 1.0181E-02  
full step: 1.0181E-02  
molecular structure not yet converged...

center of mass moved by:

x: -3.2554E-05 y: -4.4937E-04 z: 5.4326E-05

new geometry:

|      | angstroms     |               |               |
|------|---------------|---------------|---------------|
| atom | x             | y             | z             |
| H1   | -1.1778765941 | 1.8889700959  | -2.2325767378 |
| C1   | -1.0965471247 | 2.1213585286  | -1.1843696235 |
| C2   | -0.8844069844 | 2.6953114343  | 1.5039148272  |
| C3   | -0.8779428238 | 1.0872182670  | -0.2894450939 |
| C4   | -1.2021099558 | 3.4356146134  | -0.7600259955 |
| C5   | -1.0966304316 | 3.7145270154  | 0.5902115206  |
| C6   | -0.7673405182 | 1.3777414403  | 1.0724401872  |
| C7   | -0.7864581320 | -0.3523866174 | -0.7567144398 |
| H3   | -1.3670732543 | 4.2243529026  | -1.4716285007 |
| H4   | -1.1835189973 | 4.7267510897  | 0.9437982259  |
| H6   | -0.8172976384 | 2.9332180897  | 2.5476216989  |
| C16  | 0.6132983488  | -0.7650321227 | -1.2102543616 |
| C8   | -1.3981872566 | -1.2497050575 | 0.3420695992  |
| N2   | -0.5100715782 | 0.3378184895  | 1.9930013627  |
| C9   | -0.7831751996 | -0.9772331714 | 1.7047879450  |
| C10  | 0.0084223553  | 0.6532927049  | 3.3162456890  |
| O1   | -0.5834032877 | -1.8518105522 | 2.5000826037  |
| C23  | -1.3884036227 | -2.7414485478 | 0.0228174982  |
| C18  | 3.1413894713  | -1.5836947127 | -2.0939206950 |
| C19  | 0.7613496878  | -1.4867818415 | -2.3894944812 |
| C20  | 1.7596121038  | -0.4493514775 | -0.4854255845 |
| C21  | 3.0091801213  | -0.8575561642 | -0.9205556862 |
| C22  | 2.0112800323  | -1.8950279422 | -2.8296824271 |
| H2   | -0.1089617317 | -1.7348867726 | -2.9723250778 |
| H5   | 1.6839012632  | 0.1259211607  | 0.4189316837  |
| H7   | 3.8811243680  | -0.6040226281 | -0.3429784087 |
| H8   | 2.0985736182  | -2.4528264061 | -3.7454518205 |
| H9   | 4.1135794065  | -1.8976441091 | -2.4310823397 |
| H10  | -1.4323470217 | -0.4529238314 | -1.6225539925 |
| H19  | -0.3788289516 | -3.1286032092 | -0.0238446188 |
| H20  | -1.8692247573 | -2.9191104379 | -0.9346158901 |
| H21  | -1.9215301198 | -3.2931284864 | 0.7851269051  |
| H22  | -2.4353188310 | -0.9254950910 | 0.4395491847  |
| H11  | 0.8081090358  | 1.3784577400  | 3.2314922198  |
| H12  | 0.3873046320  | -0.2539282760 | 3.7545976418  |
| H13  | -0.7660034403 | 1.0550181873  | 3.9622666300  |

nuclear repulsion energy..... 1414.890396223 hartrees

-----  
/ end of geometry optimization iteration 43 /  
-----

end of program geopt

start of program onee

smallest eigenvalue of S: 3.335E-04  
number of canonical orbitals..... 368  
end of program onee

start of program probe  
end of program probe

start of program grid

number of gridpoints:

| atom     | H1  | C1  | C2  | C3  | C4  | C5  | C6  |
|----------|-----|-----|-----|-----|-----|-----|-----|
| C7       |     |     |     |     |     |     |     |
| grid # 1 | 72  | 87  | 89  | 89  | 89  | 88  | 83  |
| 81       |     |     |     |     |     |     |     |
| grid # 2 | 116 | 97  | 96  | 98  | 97  | 97  | 95  |
| 90       |     |     |     |     |     |     |     |
| grid # 3 | 217 | 182 | 184 | 194 | 183 | 184 | 189 |
| 177      |     |     |     |     |     |     |     |
| grid # 4 | 216 | 326 | 328 | 338 | 328 | 328 | 326 |
| 314      |     |     |     |     |     |     |     |

number of gridpoints:

| atom     | H3  | H4  | H6  | C16 | C8  | N2  | C9  |
|----------|-----|-----|-----|-----|-----|-----|-----|
| C10      |     |     |     |     |     |     |     |
| grid # 1 | 73  | 73  | 70  | 92  | 82  | 95  | 82  |
| 70       |     |     |     |     |     |     |     |
| grid # 2 | 118 | 118 | 112 | 100 | 90  | 105 | 92  |
| 79       |     |     |     |     |     |     |     |
| grid # 3 | 223 | 223 | 207 | 194 | 174 | 211 | 176 |
| 143      |     |     |     |     |     |     |     |
| grid # 4 | 224 | 223 | 208 | 342 | 311 | 387 | 293 |
| 273      |     |     |     |     |     |     |     |

number of gridpoints:

| atom     | O1  | C23 | C18 | C19 | C20 | C21 | C22 |
|----------|-----|-----|-----|-----|-----|-----|-----|
| H2       |     |     |     |     |     |     |     |
| grid # 1 | 111 | 74  | 89  | 88  | 88  | 89  | 89  |
| 71       |     |     |     |     |     |     |     |
| grid # 2 | 123 | 79  | 97  | 95  | 96  | 97  | 96  |
| 112      |     |     |     |     |     |     |     |
| grid # 3 | 257 | 149 | 183 | 183 | 182 | 184 | 183 |
| 212      |     |     |     |     |     |     |     |
| grid # 4 | 450 | 286 | 327 | 326 | 327 | 327 | 327 |
| 211      |     |     |     |     |     |     |     |

number of gridpoints:

| atom     | H5 | H7 | H8 | H9 | H10 | H19 | H20 |
|----------|----|----|----|----|-----|-----|-----|
| H21      |    |    |    |    |     |     |     |
| grid # 1 | 71 | 73 | 73 | 73 | 66  | 71  | 71  |
| 70       |    |    |    |    |     |     |     |



```

grid # 2      111    118    118    118    106    108    110
108
grid # 3      212    223    223    224    203    218    217
217
grid # 4      207    223    224    224    196    212    216
215

```

number of gridpoints:

| atom     | H22 | H11 | H12 | H13 | total |
|----------|-----|-----|-----|-----|-------|
| grid # 1 | 69  | 71  | 70  | 71  | 2863  |
| grid # 2 | 110 | 109 | 107 | 111 | 3729  |
| grid # 3 | 214 | 214 | 212 | 217 | 7188  |
| grid # 4 | 211 | 211 | 209 | 218 | 9912  |

end of program grid

start of program rwr

end of program rwr

start of program scf

|      | i | u | d | i | g |                  | RMS     | maximum |
|------|---|---|---|---|---|------------------|---------|---------|
|      | t | p | i | c | r |                  | energy  | DIIS    |
|      | e | d | i | u | i | total energy     | change  | error   |
|      | r | t | s | t | d |                  | density |         |
|      |   |   |   |   |   |                  | change  |         |
| etot | 1 | N | N | 1 | U | -783.03312996490 | 2.6E-05 | 1.3E-03 |
| etot | 2 | Y | Y | 4 | M | -783.03323314850 | 1.0E-04 | 5.4E-04 |
| etot | 3 | Y | Y | 4 | M | -783.03324629841 | 1.3E-05 | 1.3E-04 |
| etot | 4 | Y | N | 4 | M | -783.03324984523 | 3.5E-06 | 0.0E+00 |

Energy components, in hartrees:

|     |                               |                   |       |
|-----|-------------------------------|-------------------|-------|
| (A) | Nuclear repulsion.....        | 1414.89039622303  |       |
| (E) | Total one-electron terms..... | -3874.34551501109 |       |
| (I) | Total two-electron terms..... | 1676.42186894284  |       |
| (L) | Electronic energy.....        | -2197.92364606826 | (E+I) |
| (N) | Total energy.....             | -783.03324984523  | (A+L) |

SCFE: SCF energy: HF -783.03324984523 hartrees iterations:  
4

HOMO energy: -0.30211  
LUMO energy: 0.12929

Orbital energies:

|           |           |           |           |           |           |
|-----------|-----------|-----------|-----------|-----------|-----------|
| -20.52663 | -15.60057 | -11.34618 | -11.28619 | -11.25659 | -11.25010 |
| -11.24315 | -11.24174 | -11.24055 | -11.23855 | -11.23794 | -11.23494 |
| -11.23121 | -11.23056 | -11.23000 | -11.22954 | -11.22851 | -11.22781 |

|           |          |          |          |          |          |
|-----------|----------|----------|----------|----------|----------|
| -11.20909 | -1.39728 | -1.26969 | -1.16517 | -1.14903 | -1.10607 |
| -1.03012  | -1.01872 | -1.01796 | -1.01270 | -0.96257 | -0.93279 |
| -0.85822  | -0.83900 | -0.83338 | -0.82172 | -0.79613 | -0.74121 |
| -0.71100  | -0.69502 | -0.67286 | -0.66436 | -0.64467 | -0.63756 |
| -0.62743  | -0.61493 | -0.61225 | -0.60860 | -0.59693 | -0.58330 |
| -0.57639  | -0.55347 | -0.54884 | -0.54068 | -0.53095 | -0.51904 |
| -0.51483  | -0.50724 | -0.50111 | -0.49778 | -0.48458 | -0.46869 |
| -0.46290  | -0.42162 | -0.41155 | -0.34266 | -0.33292 | -0.32298 |
| -0.30211  | 0.12929  | 0.13404  | 0.14443  | 0.15223  | 0.20387  |
| 0.22971   | 0.24095  | 0.24892  | 0.26128  | 0.28804  |          |

end of program scf

start of program derla  
end of program derla

start of program rwr  
end of program rwr

start of program derlb

forces (hartrees/bohr) : total

| atom | label | x             | y             | z             |
|------|-------|---------------|---------------|---------------|
| 1    | H1    | -2.593313E-05 | 4.752226E-05  | -5.400960E-05 |
| 2    | C1    | -9.722814E-06 | -4.024917E-05 | 6.394110E-05  |
| 3    | C2    | -1.116491E-05 | -8.678072E-05 | -2.905445E-05 |
| 4    | C3    | 1.869277E-05  | 4.726286E-05  | 1.850651E-04  |
| 5    | C4    | -2.284691E-05 | -8.904572E-06 | -5.836790E-05 |
| 6    | C5    | -1.677935E-05 | 2.006500E-05  | -2.024272E-06 |
| 7    | C6    | -5.533760E-05 | 3.253833E-05  | -1.904874E-04 |
| 8    | C7    | 4.003288E-05  | 1.091781E-04  | 4.074114E-05  |
| 9    | H3    | -4.690792E-05 | 1.043981E-04  | -7.542225E-05 |
| 10   | H4    | -3.780260E-05 | 1.038391E-04  | -3.378706E-06 |
| 11   | H6    | -1.264257E-05 | 3.007227E-05  | 4.692390E-05  |
| 12   | C16   | -2.471120E-05 | 2.893177E-04  | 7.650634E-05  |
| 13   | C8    | -1.569064E-04 | -4.337686E-05 | -3.780526E-05 |
| 14   | N2    | -1.775391E-05 | -4.369726E-04 | 2.246400E-04  |
| 15   | C9    | 6.946956E-06  | 4.619689E-05  | -1.000894E-04 |
| 16   | C10   | -4.319361E-05 | -1.938107E-04 | 6.585427E-05  |
| 17   | O1    | -3.723769E-05 | 4.119163E-04  | -1.616137E-04 |
| 18   | C23   | -4.115256E-05 | 5.774115E-05  | -1.493980E-05 |
| 19   | C18   | 1.160713E-04  | 7.068333E-06  | 2.316427E-05  |
| 20   | C19   | 9.843168E-05  | -4.366286E-05 | -5.969005E-05 |
| 21   | C20   | 6.010948E-05  | 3.436634E-04  | 3.862554E-04  |
| 22   | C21   | 9.961180E-05  | 1.316857E-04  | 2.642514E-04  |
| 23   | C22   | -1.601284E-04 | 5.660090E-05  | -4.647161E-05 |
| 24   | H2    | -2.259684E-04 | -5.882404E-05 | -2.210379E-04 |

|       |     |               |               |               |
|-------|-----|---------------|---------------|---------------|
| 25    | H5  | -4.207347E-06 | -2.619527E-04 | -2.237184E-04 |
| 26    | H7  | -1.002766E-04 | -2.763245E-05 | -2.064677E-05 |
| 27    | H8  | -2.993417E-05 | -4.659644E-05 | -2.348585E-04 |
| 28    | H9  | -1.489325E-05 | -6.571709E-06 | -3.455965E-05 |
| 29    | H10 | -7.187510E-05 | -4.418863E-06 | -3.237203E-05 |
| 30    | H19 | -2.797072E-06 | 1.166187E-06  | -7.108444E-06 |
| 31    | H20 | -1.297488E-05 | 2.879369E-05  | -3.177992E-05 |
| 32    | H21 | -5.051204E-05 | 6.964550E-06  | 3.600861E-05  |
| 33    | H22 | 1.691152E-05  | -5.169720E-06 | -1.418318E-05 |
| 34    | H11 | 1.007081E-04  | 1.366115E-04  | 1.773272E-05  |
| 35    | H12 | -2.756829E-05 | 2.071524E-04  | -6.709155E-05 |
| 36    | H13 | -4.626406E-05 | 6.643862E-05  | -3.946632E-06 |
| ----- |     | -----         | -----         | -----         |
| total |     | -7.499763E-04 | 1.021270E-03  | -2.935731E-04 |

end of program derlb

start of program geopt 44

geometry optimization step 44

reading input hessian of dimension 108  
in five columns format  
reading input hessian of dimension 108  
in five columns format

Level shifts adjusted to satisfy step-size constraints

Step size: 0.0102626  
Cos(theta): 0.7304804

Final level shift: -6.7699058E-02

energy change: 5.6955E-06 \* ( 5.0000E-05 )  
gradient maximum: 8.6768E-04 . ( 4.5000E-04 )  
gradient rms: 1.7015E-04 \* ( 3.0000E-04 )  
step size: 0.01026 trust radius: 0.01000  
displacement maximum: 5.9272E-03 . ( 1.8000E-03 )  
displacement rms: 9.2913E-04 \* ( 1.2000E-03 )  
predicted energy change: -1.0609E-05 geom step: 1.0263E-  
02 full step: 1.0263E-02  
molecular structure not yet converged...

center of mass moved by:

x: 1.2441E-05 y: 4.5957E-04 z: -4.5035E-05

new geometry:

|      |               |              |               | angstroms |  |  |
|------|---------------|--------------|---------------|-----------|--|--|
| atom | x             | y            | z             |           |  |  |
| H1   | -1.1804594668 | 1.8878103081 | -2.2327523705 |           |  |  |
| C1   | -1.0989185957 | 2.1207128205 | -1.1845989513 |           |  |  |
| C2   | -0.8861077787 | 2.6958553070 | 1.5031070810  |           |  |  |

S495

|     |               |               |               |
|-----|---------------|---------------|---------------|
| C3  | -0.8786008920 | 1.0872667532  | -0.2892562575 |
| C4  | -1.2059546059 | 3.4350379220  | -0.7610566113 |
| C5  | -1.1000836777 | 3.7145711776  | 0.5890828258  |
| C6  | -0.7677865045 | 1.3782487857  | 1.0721788765  |
| C7  | -0.7861696283 | -0.3520917413 | -0.7565666694 |
| H3  | -1.3724511832 | 4.2233295622  | -1.4730722542 |
| H4  | -1.1881812813 | 4.7269721358  | 0.9422077126  |
| H6  | -0.8186682107 | 2.9341274366  | 2.5468155021  |
| C16 | 0.6135935501  | -0.7638279342 | -1.2106870893 |
| C8  | -1.3971385423 | -1.2499388497 | 0.3423159655  |
| N2  | -0.5090177006 | 0.3386505145  | 1.9931090105  |
| C9  | -0.7814102295 | -0.9760810484 | 1.7045874734  |
| C10 | 0.0107665103  | 0.6561596353  | 3.3153692451  |
| O1  | -0.5801554403 | -1.8494712619 | 2.5003103902  |
| C23 | -1.3858126082 | -2.7417075592 | 0.0237951654  |
| C18 | 3.1407024337  | -1.5868193226 | -2.0929057556 |
| C19 | 0.7616158953  | -1.4796015753 | -2.3942250069 |
| C20 | 1.7593217134  | -0.4572436325 | -0.4802946062 |
| C21 | 3.0084799771  | -0.8678564023 | -0.9146879648 |
| C22 | 2.0111806401  | -1.8892083872 | -2.8340753403 |
| H2  | -0.1085589393 | -1.7224580739 | -2.9808234584 |
| H5  | 1.6830222533  | 0.1092233447  | 0.4285863250  |
| H7  | 3.8796083834  | -0.6223686824 | -0.3328834810 |
| H8  | 2.0986249086  | -2.4415375096 | -3.7537565595 |
| H9  | 4.1123445194  | -1.9028259836 | -2.4297630674 |
| H10 | -1.4326602898 | -0.4533802709 | -1.6220131910 |
| H19 | -0.3758609365 | -3.1283404360 | -0.0213143832 |
| H20 | -1.8649902244 | -2.9200066563 | -0.9343572507 |
| H21 | -1.9196751467 | -3.2934561641 | 0.7857156809  |
| H22 | -2.4344035219 | -0.9267714796 | 0.4400308613  |
| H11 | 0.8096346991  | 1.3826719653  | 3.2289179041  |
| H12 | 0.3919381852  | -0.2492921436 | 3.7541843247  |
| H13 | -0.7635390802 | 1.0578667656  | 3.9616435282  |

nuclear repulsion energy..... 1414.894156743 hartrees

-----  
 / end of geometry optimization iteration 44 /  
 -----

end of program geopt

start of program onee  
 smallest eigenvalue of S: 3.334E-04  
 number of canonical orbitals..... 368  
 end of program onee

start of program probe  
 end of program probe

start of program grid

number of gridpoints:

| atom     | H1  | C1  | C2  | C3  | C4  | C5  | C6  |
|----------|-----|-----|-----|-----|-----|-----|-----|
| C7       |     |     |     |     |     |     |     |
| grid # 1 | 72  | 87  | 89  | 90  | 89  | 88  | 84  |
| 81       |     |     |     |     |     |     |     |
| grid # 2 | 116 | 97  | 96  | 98  | 97  | 97  | 94  |
| 90       |     |     |     |     |     |     |     |
| grid # 3 | 217 | 182 | 184 | 194 | 183 | 184 | 189 |
| 177      |     |     |     |     |     |     |     |
| grid # 4 | 216 | 326 | 328 | 338 | 328 | 328 | 323 |
| 314      |     |     |     |     |     |     |     |

number of gridpoints:

| atom     | H3  | H4  | H6  | C16 | C8  | N2  | C9  |
|----------|-----|-----|-----|-----|-----|-----|-----|
| C10      |     |     |     |     |     |     |     |
| grid # 1 | 73  | 73  | 70  | 92  | 82  | 95  | 82  |
| 69       |     |     |     |     |     |     |     |
| grid # 2 | 118 | 118 | 112 | 100 | 90  | 105 | 92  |
| 78       |     |     |     |     |     |     |     |
| grid # 3 | 223 | 223 | 207 | 194 | 174 | 211 | 176 |
| 146      |     |     |     |     |     |     |     |
| grid # 4 | 224 | 223 | 208 | 342 | 311 | 387 | 293 |
| 276      |     |     |     |     |     |     |     |

number of gridpoints:

| atom     | O1  | C23 | C18 | C19 | C20 | C21 | C22 |
|----------|-----|-----|-----|-----|-----|-----|-----|
| H2       |     |     |     |     |     |     |     |
| grid # 1 | 111 | 74  | 89  | 88  | 88  | 89  | 89  |
| 71       |     |     |     |     |     |     |     |
| grid # 2 | 123 | 80  | 97  | 95  | 96  | 97  | 96  |
| 112      |     |     |     |     |     |     |     |
| grid # 3 | 257 | 150 | 183 | 183 | 182 | 184 | 183 |
| 212      |     |     |     |     |     |     |     |
| grid # 4 | 450 | 285 | 327 | 326 | 327 | 327 | 327 |
| 211      |     |     |     |     |     |     |     |

number of gridpoints:

| atom     | H5  | H7  | H8  | H9  | H10 | H19 | H20 |
|----------|-----|-----|-----|-----|-----|-----|-----|
| H21      |     |     |     |     |     |     |     |
| grid # 1 | 71  | 73  | 73  | 73  | 66  | 71  | 71  |
| 70       |     |     |     |     |     |     |     |
| grid # 2 | 111 | 118 | 118 | 118 | 106 | 108 | 110 |
| 108      |     |     |     |     |     |     |     |
| grid # 3 | 212 | 223 | 223 | 224 | 202 | 218 | 216 |
| 217      |     |     |     |     |     |     |     |
| grid # 4 | 207 | 223 | 224 | 224 | 196 | 212 | 216 |
| 215      |     |     |     |     |     |     |     |

number of gridpoints:

| atom | H22 | H11 | H12 | H13 | total |
|------|-----|-----|-----|-----|-------|
|------|-----|-----|-----|-----|-------|

```

grid # 1      69      71      70      71      2864
grid # 2     110     109     108     111     3729
grid # 3     214     213     212     217     7189
grid # 4     211     211     209     218     9911

```

end of program grid

```

start of program rwr
end of program rwr

```

start of program scf

|      | i | u | d | i | g |                  | energy   | RMS     | maximum |
|------|---|---|---|---|---|------------------|----------|---------|---------|
|      | t | p | i | c | r |                  | change   | density | DIIS    |
|      | e | d | i | u | i | total energy     |          | change  | error   |
|      | r | t | s | t | d |                  |          |         |         |
| etot | 1 | N | N | 1 | U | -783.03313466064 |          | 2.6E-05 | 1.3E-03 |
| etot | 2 | Y | Y | 4 | M | -783.03324030772 | 1.1E-04  | 1.2E-05 | 5.3E-04 |
| etot | 3 | Y | Y | 4 | M | -783.03325723312 | 1.7E-05  | 3.7E-06 | 1.3E-04 |
| etot | 4 | Y | N | 4 | M | -783.03325577929 | -1.5E-06 | 0.0E+00 | 0.0E+00 |

Energy components, in hartrees:

```

(A) Nuclear repulsion..... 1414.89415674291
(E) Total one-electron terms..... -3874.36205711246
(I) Total two-electron terms..... 1676.43464459026
(L) Electronic energy..... -2197.92741252220 (E+I)
(N) Total energy..... -783.03325577929 (A+L)

```

```

SCFE: SCF energy: HF      -783.03325577929 hartrees  iterations:
4

```

```

HOMO energy:      -0.30204
LUMO energy:       0.12928

```

Orbital energies:

```

-20.52691  -15.60008  -11.34577  -11.28574  -11.25660  -11.24981
-11.24296  -11.24134  -11.24052  -11.23872  -11.23790  -11.23494
-11.23148  -11.23061  -11.23017  -11.22982  -11.22870  -11.22760
-11.20917  -1.39748   -1.26943   -1.16498   -1.14892   -1.10595
-1.03000   -1.01861   -1.01779   -1.01270   -0.96254   -0.93266
-0.85808   -0.83891   -0.83326   -0.82165   -0.79604   -0.74108
-0.71093   -0.69497   -0.67281   -0.66427   -0.64458   -0.63752
-0.62742   -0.61487   -0.61224   -0.60847   -0.59690   -0.58336
-0.57624   -0.55339   -0.54873   -0.54063   -0.53098   -0.51904
-0.51487   -0.50717   -0.50097   -0.49774   -0.48457   -0.46861
-0.46284   -0.42148   -0.41148   -0.34253   -0.33295   -0.32283
-0.30204   0.12928    0.13401    0.14451    0.15235    0.20401

```

0.22968 0.24104 0.24885 0.26136 0.28826

end of program scf

start of program derla  
end of program derla

start of program rwr  
end of program rwr

start of program der1b

forces (hartrees/bohr) : total

| atom | label | x             | y             | z             |
|------|-------|---------------|---------------|---------------|
| 1    | H1    | -1.374996E-05 | 1.444845E-05  | 3.658792E-05  |
| 2    | C1    | -2.989657E-05 | 1.047020E-04  | -8.015220E-05 |
| 3    | C2    | -4.534906E-05 | 1.426150E-04  | 1.394123E-05  |
| 4    | C3    | -4.618557E-05 | 1.319810E-05  | -2.083023E-04 |
| 5    | C4    | -1.856831E-05 | 6.695007E-05  | 4.023099E-05  |
| 6    | C5    | -2.167081E-05 | 4.074157E-05  | -1.088725E-05 |
| 7    | C6    | 3.501114E-05  | 3.696430E-05  | 1.602720E-04  |
| 8    | C7    | -9.382301E-05 | -5.606039E-05 | -5.539719E-05 |
| 9    | H3    | 6.769898E-06  | -4.213392E-05 | 5.925536E-05  |
| 10   | H4    | -2.861011E-06 | -4.384241E-05 | -1.171237E-05 |
| 11   | H6    | -3.260359E-05 | 2.999225E-05  | -6.313540E-05 |
| 12   | C16   | -2.361513E-05 | -2.387910E-04 | -7.583739E-05 |
| 13   | C8    | 1.258817E-04  | 1.063336E-04  | 2.106111E-05  |
| 14   | N2    | -4.640259E-05 | 4.910555E-04  | -2.476111E-04 |
| 15   | C9    | -6.283859E-05 | 2.049213E-05  | 9.018169E-05  |
| 16   | C10   | 9.130023E-06  | 2.169888E-04  | -6.074603E-05 |
| 17   | O1    | -3.392537E-06 | -3.472550E-04 | 1.510153E-04  |
| 18   | C23   | 1.441184E-06  | 3.680549E-06  | -7.437807E-06 |
| 19   | C18   | -1.466072E-04 | 5.226018E-05  | -3.889968E-05 |
| 20   | C19   | -1.421842E-04 | 1.099595E-04  | 3.668641E-05  |
| 21   | C20   | -1.046247E-04 | -2.728761E-04 | -3.913034E-04 |
| 22   | C21   | -1.335176E-04 | -6.588386E-05 | -2.742847E-04 |
| 23   | C22   | 1.173937E-04  | 3.245300E-06  | 2.587399E-05  |
| 24   | H2    | 1.793192E-04  | 1.197155E-04  | 1.953869E-04  |
| 25   | H5    | -3.561795E-05 | 3.131992E-04  | 2.045730E-04  |
| 26   | H7    | 5.947277E-05  | 8.105790E-05  | 9.700419E-06  |
| 27   | H8    | -1.079649E-05 | 1.002828E-04  | 2.070789E-04  |
| 28   | H9    | -2.581811E-05 | 6.453680E-05  | 1.817960E-05  |
| 29   | H10   | 3.350872E-05  | 6.433806E-05  | 1.303009E-05  |
| 30   | H19   | -3.930182E-05 | 5.693530E-05  | -9.932210E-06 |
| 31   | H20   | -3.067714E-05 | 3.130425E-05  | 1.142604E-05  |
| 32   | H21   | 4.827666E-06  | 4.887153E-05  | -5.321453E-05 |
| 33   | H22   | -6.257343E-05 | 6.294713E-05  | -3.233179E-06 |

|       |       |               |               |               |
|-------|-------|---------------|---------------|---------------|
| 34    | H11   | -1.573241E-04 | -6.751858E-05 | -3.152223E-05 |
| 35    | H12   | -8.278252E-06 | -1.445661E-04 | 5.193516E-05  |
| 36    | H13   | 2.423725E-05  | -1.717051E-05 | -1.509528E-05 |
| ----- |       |               |               |               |
|       | total | -7.412846E-04 | 1.100718E-03  | -2.922882E-04 |

end of program der1b

start of program geopt 45

geometry optimization step 45

reading input hessian of dimension 108  
in five columns format  
reading input hessian of dimension 108  
in five columns format

Level shifts adjusted to satisfy step-size constraints

Step size: 0.0101843

Cos(theta): 0.7156641

Final level shift: -6.2018670E-02

energy change: -5.9341E-06 \* ( 5.0000E-05 )  
gradient maximum: 8.5281E-04 . ( 4.5000E-04 )  
gradient rms: 1.6630E-04 \* ( 3.0000E-04 )  
step size: 0.01018 trust radius: 0.01000  
displacement maximum: 5.8909E-03 . ( 1.8000E-03 )  
displacement rms: 9.2204E-04 \* ( 1.2000E-03 )  
predicted energy change: -9.9103E-06 geom step: 1.0184E-  
02 full step: 1.0184E-02  
molecular structure not yet converged...

center of mass moved by:

x: -3.1802E-05 y: -4.5080E-04 z: 5.4004E-05

new geometry:

|      | angstroms     |               |               |
|------|---------------|---------------|---------------|
| atom | x             | y             | z             |
| H1   | -1.1778415137 | 1.8890071417  | -2.2326029098 |
| C1   | -1.0965370151 | 2.1213857129  | -1.1843914795 |
| C2   | -0.8845088467 | 2.6953160757  | 1.5039104393  |
| C3   | -0.8779056124 | 1.0872453269  | -0.2894723877 |
| C4   | -1.2021678482 | 3.4356315848  | -0.7600322305 |
| C5   | -1.0967542326 | 3.7145334952  | 0.5902138190  |
| C6   | -0.7673332533 | 1.3777645933  | 1.0724148509  |
| C7   | -0.7864272645 | -0.3523651661 | -0.7567297860 |
| H3   | -1.3671494905 | 4.2243707776  | -1.4716298171 |
| H4   | -1.1837217723 | 4.7267476481  | 0.9438091546  |
| H6   | -0.8174754280 | 2.9331990067  | 2.5476293690  |
| C16  | 0.6133299324  | -0.7650461964 | -1.2102337762 |

S500



|     |               |               |               |
|-----|---------------|---------------|---------------|
| C8  | -1.3982114045 | -1.2496636107 | 0.3420443914  |
| N2  | -0.5100253345 | 0.3378348934  | 1.9929607513  |
| C9  | -0.7832264604 | -0.9771986801 | 1.7047781862  |
| C10 | 0.0086286418  | 0.6532600349  | 3.3161581105  |
| O1  | -0.5835230169 | -1.8517636361 | 2.5001046818  |
| C23 | -1.3884522076 | -2.7414100563 | 0.0228010800  |
| C18 | 3.1414207869  | -1.5837741668 | -2.0938497442 |
| C19 | 0.7613907921  | -1.4867731976 | -2.3894886861 |
| C20 | 1.7596354145  | -0.4494193719 | -0.4853666281 |
| C21 | 3.0092022373  | -0.8576579252 | -0.9204710044 |
| C22 | 2.0113211666  | -1.8950501437 | -2.8296527006 |
| H2  | -0.1089129774 | -1.7348339156 | -2.9723515558 |
| H5  | 1.6839191098  | 0.1258361227  | 0.4190002872  |
| H7  | 3.8811389485  | -0.6041703716 | -0.3428613070 |
| H8  | 2.0986214419  | -2.4528268628 | -3.7454359378 |
| H9  | 4.1136093351  | -1.8977495201 | -2.4309910504 |
| H10 | -1.4322934446 | -0.4528936613 | -1.6225871933 |
| H19 | -0.3788845498 | -3.1285872386 | -0.0238368714 |
| H20 | -1.8692563847 | -2.9190675747 | -0.9346418859 |
| H21 | -1.9216078714 | -3.2930741627 | 0.7851024488  |
| H22 | -2.4353401065 | -0.9254318628 | 0.4394890980  |
| H11 | 0.8080389672  | 1.3787165917  | 3.2313417702  |
| H12 | 0.3879219707  | -0.2538980287 | 3.7542883390  |
| H13 | -0.7657876788 | 1.0546135586  | 3.9624189591  |

nuclear repulsion energy..... 1414.889640653 hartrees

-----  
 / end of geometry optimization iteration 45 /  
 -----

end of program geopt

start of program onee  
 smallest eigenvalue of S: 3.335E-04  
 number of canonical orbitals..... 368  
 end of program onee

start of program probe  
 end of program probe

start of program grid

number of gridpoints:

| atom     | H1  | C1 | C2 | C3 | C4 | C5 | C6 |
|----------|-----|----|----|----|----|----|----|
| C7       |     |    |    |    |    |    |    |
| grid # 1 | 72  | 87 | 89 | 89 | 89 | 88 | 83 |
| 81       |     |    |    |    |    |    |    |
| grid # 2 | 116 | 97 | 96 | 98 | 97 | 97 | 95 |
| 90       |     |    |    |    |    |    |    |

|          |     |     |     |     |     |     |     |
|----------|-----|-----|-----|-----|-----|-----|-----|
| grid # 3 | 217 | 182 | 184 | 194 | 183 | 184 | 189 |
| 177      |     |     |     |     |     |     |     |
| grid # 4 | 216 | 326 | 328 | 338 | 328 | 328 | 326 |
| 314      |     |     |     |     |     |     |     |

number of gridpoints:

|          |     |     |     |     |     |     |     |
|----------|-----|-----|-----|-----|-----|-----|-----|
| atom     | H3  | H4  | H6  | C16 | C8  | N2  | C9  |
| C10      |     |     |     |     |     |     |     |
| grid # 1 | 73  | 73  | 70  | 92  | 82  | 95  | 82  |
| 70       |     |     |     |     |     |     |     |
| grid # 2 | 118 | 118 | 112 | 100 | 90  | 105 | 92  |
| 79       |     |     |     |     |     |     |     |
| grid # 3 | 223 | 223 | 207 | 194 | 174 | 211 | 176 |
| 143      |     |     |     |     |     |     |     |
| grid # 4 | 224 | 223 | 208 | 342 | 311 | 387 | 293 |
| 273      |     |     |     |     |     |     |     |

number of gridpoints:

|          |     |     |     |     |     |     |     |
|----------|-----|-----|-----|-----|-----|-----|-----|
| atom     | O1  | C23 | C18 | C19 | C20 | C21 | C22 |
| H2       |     |     |     |     |     |     |     |
| grid # 1 | 111 | 74  | 89  | 88  | 88  | 89  | 89  |
| 71       |     |     |     |     |     |     |     |
| grid # 2 | 123 | 79  | 97  | 95  | 96  | 97  | 96  |
| 112      |     |     |     |     |     |     |     |
| grid # 3 | 257 | 149 | 183 | 183 | 182 | 184 | 183 |
| 212      |     |     |     |     |     |     |     |
| grid # 4 | 450 | 286 | 327 | 326 | 327 | 327 | 327 |
| 211      |     |     |     |     |     |     |     |

number of gridpoints:

|          |     |     |     |     |     |     |     |
|----------|-----|-----|-----|-----|-----|-----|-----|
| atom     | H5  | H7  | H8  | H9  | H10 | H19 | H20 |
| H21      |     |     |     |     |     |     |     |
| grid # 1 | 71  | 73  | 73  | 73  | 66  | 71  | 71  |
| 70       |     |     |     |     |     |     |     |
| grid # 2 | 111 | 118 | 118 | 118 | 106 | 108 | 110 |
| 108      |     |     |     |     |     |     |     |
| grid # 3 | 212 | 223 | 223 | 224 | 203 | 218 | 217 |
| 217      |     |     |     |     |     |     |     |
| grid # 4 | 207 | 223 | 224 | 224 | 196 | 212 | 216 |
| 215      |     |     |     |     |     |     |     |

number of gridpoints:

|          |     |     |     |     |       |
|----------|-----|-----|-----|-----|-------|
| atom     | H22 | H11 | H12 | H13 | total |
| grid # 1 | 69  | 71  | 70  | 71  | 2863  |
| grid # 2 | 110 | 109 | 107 | 111 | 3729  |
| grid # 3 | 214 | 214 | 212 | 217 | 7188  |
| grid # 4 | 211 | 211 | 209 | 218 | 9912  |

end of program grid

start of program rwr

end of program rwr

start of program scf

|      | i | u | d | i | g |                  | RMS     | maximum |
|------|---|---|---|---|---|------------------|---------|---------|
|      | t | p | i | c | r |                  | energy  | DIIS    |
|      | e | d | i | u | i | total energy     | density | error   |
|      | r | t | s | t | d | change           | change  |         |
| etot | 1 | N | N | 1 | U | -783.03312974394 | 2.6E-05 | 1.3E-03 |
| etot | 2 | Y | Y | 4 | M | -783.03323319538 | 1.0E-04 | 5.4E-04 |
| etot | 3 | Y | Y | 4 | M | -783.03324635334 | 1.3E-05 | 1.3E-04 |
| etot | 4 | Y | N | 4 | M | -783.03324996818 | 3.6E-06 | 0.0E+00 |

Energy components, in hartrees:

|     |                               |                   |       |
|-----|-------------------------------|-------------------|-------|
| (A) | Nuclear repulsion.....        | 1414.88964065331  |       |
| (E) | Total one-electron terms..... | -3874.34400733605 |       |
| (I) | Total two-electron terms..... | 1676.42111671456  |       |
| (L) | Electronic energy.....        | -2197.92289062149 | (E+I) |
| (N) | Total energy.....             | -783.03324996818  | (A+L) |

SCFE: SCF energy: HF -783.03324996818 hartrees iterations:  
4

HOMO energy: -0.30211  
LUMO energy: 0.12929

Orbital energies:

|           |           |           |           |           |           |
|-----------|-----------|-----------|-----------|-----------|-----------|
| -20.52663 | -15.60057 | -11.34618 | -11.28619 | -11.25659 | -11.25010 |
| -11.24315 | -11.24175 | -11.24055 | -11.23855 | -11.23794 | -11.23494 |
| -11.23121 | -11.23056 | -11.23000 | -11.22954 | -11.22851 | -11.22781 |
| -11.20909 | -1.39728  | -1.26969  | -1.16517  | -1.14903  | -1.10607  |
| -1.03012  | -1.01872  | -1.01796  | -1.01270  | -0.96257  | -0.93279  |
| -0.85822  | -0.83900  | -0.83338  | -0.82172  | -0.79613  | -0.74121  |
| -0.71100  | -0.69502  | -0.67286  | -0.66436  | -0.64467  | -0.63756  |
| -0.62743  | -0.61493  | -0.61225  | -0.60860  | -0.59692  | -0.58330  |
| -0.57639  | -0.55348  | -0.54884  | -0.54068  | -0.53095  | -0.51904  |
| -0.51483  | -0.50723  | -0.50111  | -0.49778  | -0.48458  | -0.46869  |
| -0.46290  | -0.42162  | -0.41154  | -0.34266  | -0.33292  | -0.32298  |
| -0.30211  | 0.12929   | 0.13404   | 0.14443   | 0.15222   | 0.20387   |
| 0.22971   | 0.24095   | 0.24893   | 0.26128   | 0.28804   |           |

end of program scf

start of program derla  
end of program derla

start of program rwr  
end of program rwr

start of program der1b

forces (hartrees/bohr) : total

| atom  | label | x             | y             | z             |
|-------|-------|---------------|---------------|---------------|
| 1     | H1    | -2.593197E-05 | 4.744537E-05  | -5.379619E-05 |
| 2     | C1    | -9.615635E-06 | -4.076573E-05 | 6.414691E-05  |
| 3     | C2    | -9.537623E-06 | -8.658949E-05 | -2.896425E-05 |
| 4     | C3    | 1.735167E-05  | 4.737873E-05  | 1.853036E-04  |
| 5     | C4    | -2.269523E-05 | -8.734416E-06 | -5.812024E-05 |
| 6     | C5    | -1.702405E-05 | 1.997372E-05  | -2.280607E-06 |
| 7     | C6    | -5.710676E-05 | 3.105719E-05  | -1.893438E-04 |
| 8     | C7    | 4.109482E-05  | 1.093106E-04  | 4.035450E-05  |
| 9     | H3    | -4.687446E-05 | 1.043752E-04  | -7.527442E-05 |
| 10    | H4    | -3.781954E-05 | 1.038589E-04  | -3.209037E-06 |
| 11    | H6    | -1.224717E-05 | 2.988169E-05  | 4.717140E-05  |
| 12    | C16   | -2.375881E-05 | 2.888080E-04  | 7.507849E-05  |
| 13    | C8    | -1.578700E-04 | -4.351302E-05 | -3.716241E-05 |
| 14    | N2    | -1.645269E-05 | -4.373078E-04 | 2.250705E-04  |
| 15    | C9    | 8.485128E-06  | 4.595655E-05  | -1.006815E-04 |
| 16    | C10   | -4.387915E-05 | -1.907708E-04 | 6.340120E-05  |
| 17    | O1    | -3.726744E-05 | 4.115989E-04  | -1.624888E-04 |
| 18    | C23   | -4.131560E-05 | 5.762049E-05  | -1.469610E-05 |
| 19    | C18   | 1.149371E-04  | 7.178035E-06  | 2.296499E-05  |
| 20    | C19   | 9.917560E-05  | -4.333284E-05 | -5.916228E-05 |
| 21    | C20   | 6.003989E-05  | 3.431386E-04  | 3.852964E-04  |
| 22    | C21   | 9.919148E-05  | 1.314184E-04  | 2.641726E-04  |
| 23    | C22   | -1.607724E-04 | 5.701543E-05  | -4.591316E-05 |
| 24    | H2    | -2.252531E-04 | -5.866784E-05 | -2.204760E-04 |
| 25    | H5    | -4.248718E-06 | -2.619024E-04 | -2.234698E-04 |
| 26    | H7    | -1.004668E-04 | -2.751029E-05 | -2.086708E-05 |
| 27    | H8    | -2.990222E-05 | -4.631079E-05 | -2.340744E-04 |
| 28    | H9    | -1.475807E-05 | -6.556654E-06 | -3.450429E-05 |
| 29    | H10   | -7.210258E-05 | -4.377440E-06 | -3.206467E-05 |
| 30    | H19   | -2.984501E-06 | 1.315501E-06  | -7.098188E-06 |
| 31    | H20   | -1.282843E-05 | 2.882525E-05  | -3.166486E-05 |
| 32    | H21   | -5.025623E-05 | 7.263849E-06  | 3.580896E-05  |
| 33    | H22   | 1.744947E-05  | -5.113511E-06 | -1.424059E-05 |
| 34    | H11   | 1.022640E-04  | 1.356804E-04  | 1.778626E-05  |
| 35    | H12   | -2.841015E-05 | 2.064918E-04  | -6.707158E-05 |
| 36    | H13   | -4.840131E-05 | 6.732414E-05  | -3.405483E-06 |
| total |       | -7.497915E-04 | 1.021464E-03  | -2.934738E-04 |

end of program der1b

start of program geopt 46

geometry optimization step 46

reading input hessian of dimension 108  
in five columns format  
reading input hessian of dimension 108  
in five columns format

Level shifts adjusted to satisfy step-size constraints

Step size: 0.0102598  
Cos(theta): 0.7300812

Final level shift: -6.7550790E-02

energy change: 5.8111E-06 \* ( 5.0000E-05 )  
gradient maximum: 8.6775E-04 . ( 4.5000E-04 )  
gradient rms: 1.7004E-04 \* ( 3.0000E-04 )  
step size: 0.01026 trust radius: 0.01000  
displacement maximum: 5.9299E-03 . ( 1.8000E-03 )  
displacement rms: 9.2888E-04 \* ( 1.2000E-03 )  
predicted energy change: -1.0590E-05 geom step: 1.0260E-  
02 full step: 1.0260E-02  
molecular structure not yet converged...

center of mass moved by:

x: 1.5401E-05 y: 4.5917E-04 z: -4.6455E-05

new geometry:

|      | angstroms     |               |               |
|------|---------------|---------------|---------------|
| atom | x             | y             | z             |
| H1   | -1.1804284623 | 1.8878422856  | -2.2327760573 |
| C1   | -1.0989099846 | 2.1207365745  | -1.1846189531 |
| C2   | -0.8862001817 | 2.6958607935  | 1.5031020895  |
| C3   | -0.8785667722 | 1.0872909185  | -0.2892807733 |
| C4   | -1.2060085684 | 3.4350529892  | -0.7610635728 |
| C5   | -1.1001971534 | 3.7145778388  | 0.5890832466  |
| C6   | -0.7677793812 | 1.3782703481  | 1.0721556811  |
| C7   | -0.7861411061 | -0.3520728342 | -0.7565801186 |
| H3   | -1.3725228593 | 4.2233447597  | -1.4730753432 |
| H4   | -1.1883669911 | 4.7269699206  | 0.9422155708  |
| H6   | -0.8188291595 | 2.9341126054  | 2.5468212972  |
| C16  | 0.6136222858  | -0.7638413217 | -1.2106693278 |
| C8   | -1.3971578520 | -1.2499019925 | 0.3422949326  |
| N2   | -0.5089765112 | 0.3386672124  | 1.9930722513  |
| C9   | -0.7814540753 | -0.9760481998 | 1.7045799059  |
| C10  | 0.0109477076  | 0.6561326949  | 3.3152922799  |
| O1   | -0.5802575671 | -1.8494260754 | 2.5003320198  |
| C23  | -1.3858531301 | -2.7416734271 | 0.0237828796  |
| C18  | 3.1407285589  | -1.5868939710 | -2.0928436185 |
| C19  | 0.7616528322  | -1.4795879139 | -2.3942235864 |
| C20  | 1.7593420390  | -0.4573123788 | -0.4802389848 |

S505

|     |               |               |               |
|-----|---------------|---------------|---------------|
| C21 | 3.0084985495  | -0.8679568990 | -0.9146091792 |
| C22 | 2.0112157901  | -1.8892239940 | -2.8340533675 |
| H2  | -0.1085142040 | -1.7223986126 | -2.9808529554 |
| H5  | 1.6830375295  | 0.1091341259  | 0.4286536933  |
| H7  | 3.8796198042  | -0.6225165111 | -0.3327730156 |
| H8  | 2.0986662823  | -2.4415290061 | -3.7537502091 |
| H9  | 4.1123688874  | -1.9029253991 | -2.4296834396 |
| H10 | -1.4326124822 | -0.4533542197 | -1.6220414679 |
| H19 | -0.3759078611 | -3.1283243092 | -0.0213087768 |
| H20 | -1.8650194685 | -2.9199704870 | -0.9343757649 |
| H21 | -1.9197375534 | -3.2934080764 | 0.7856985201  |
| H22 | -2.4344203010 | -0.9267159734 | 0.4399788708  |
| H11 | 0.8095670665  | 1.3829070826  | 3.2287885688  |
| H12 | 0.3924857097  | -0.2492636744 | 3.7539081048  |
| H13 | -0.7633497835 | 1.0575049204  | 3.9617823863  |

nuclear repulsion energy..... 1414.893481698 hartrees

-----  
/ end of geometry optimization iteration 46 /  
-----

end of program geopt

start of program onee  
smallest eigenvalue of S: 3.334E-04  
number of canonical orbitals..... 368  
end of program onee

start of program probe  
end of program probe

start of program grid

number of gridpoints:

| atom     | H1  | C1  | C2  | C3  | C4  | C5  | C6  |
|----------|-----|-----|-----|-----|-----|-----|-----|
| C7       |     |     |     |     |     |     |     |
| grid # 1 | 72  | 87  | 89  | 90  | 89  | 88  | 84  |
| 81       |     |     |     |     |     |     |     |
| grid # 2 | 116 | 97  | 96  | 98  | 97  | 97  | 94  |
| 90       |     |     |     |     |     |     |     |
| grid # 3 | 217 | 182 | 184 | 194 | 183 | 184 | 189 |
| 177      |     |     |     |     |     |     |     |
| grid # 4 | 216 | 326 | 328 | 338 | 328 | 328 | 323 |
| 314      |     |     |     |     |     |     |     |

number of gridpoints:

| atom | H3 | H4 | H6 | C16 | C8 | N2 | C9 |
|------|----|----|----|-----|----|----|----|
| C10  |    |    |    |     |    |    |    |

|     |          |     |     |     |     |     |     |     |
|-----|----------|-----|-----|-----|-----|-----|-----|-----|
| 69  | grid # 1 | 73  | 73  | 70  | 92  | 82  | 95  | 82  |
| 78  | grid # 2 | 118 | 118 | 112 | 100 | 90  | 105 | 92  |
| 146 | grid # 3 | 223 | 223 | 207 | 194 | 174 | 211 | 176 |
| 276 | grid # 4 | 224 | 223 | 208 | 342 | 311 | 387 | 293 |

number of gridpoints:

|     |          |     |     |     |     |     |     |     |
|-----|----------|-----|-----|-----|-----|-----|-----|-----|
| H2  | atom     | O1  | C23 | C18 | C19 | C20 | C21 | C22 |
| 71  | grid # 1 | 111 | 74  | 89  | 88  | 88  | 89  | 89  |
| 112 | grid # 2 | 123 | 80  | 97  | 95  | 96  | 97  | 96  |
| 212 | grid # 3 | 257 | 150 | 183 | 183 | 182 | 184 | 183 |
| 211 | grid # 4 | 450 | 285 | 327 | 326 | 327 | 327 | 327 |

number of gridpoints:

|     |          |     |     |     |     |     |     |     |
|-----|----------|-----|-----|-----|-----|-----|-----|-----|
| H21 | atom     | H5  | H7  | H8  | H9  | H10 | H19 | H20 |
| 70  | grid # 1 | 71  | 73  | 73  | 73  | 66  | 71  | 71  |
| 108 | grid # 2 | 111 | 118 | 118 | 118 | 106 | 108 | 110 |
| 217 | grid # 3 | 212 | 223 | 223 | 224 | 202 | 218 | 216 |
| 215 | grid # 4 | 207 | 223 | 224 | 224 | 196 | 212 | 216 |

number of gridpoints:

|  |          |     |     |     |     |       |
|--|----------|-----|-----|-----|-----|-------|
|  | atom     | H22 | H11 | H12 | H13 | total |
|  | grid # 1 | 69  | 71  | 70  | 71  | 2864  |
|  | grid # 2 | 110 | 109 | 108 | 111 | 3729  |
|  | grid # 3 | 214 | 213 | 212 | 217 | 7189  |
|  | grid # 4 | 211 | 211 | 209 | 218 | 9911  |

end of program grid

start of program rwr  
end of program rwr

start of program scf

|   |   |   |   |   |        |                             |
|---|---|---|---|---|--------|-----------------------------|
| i | u | d | i | g |        |                             |
| t | p | i | c | r |        |                             |
| e | d | i | u | i | energy | RMS maximum<br>density DIIS |

|      | r | t | s | t | d | total energy     | change   | change  | error   |
|------|---|---|---|---|---|------------------|----------|---------|---------|
| etot | 1 | N | N | 1 | U | -783.03313451392 |          | 2.6E-05 | 1.3E-03 |
| etot | 2 | Y | Y | 4 | M | -783.03324018241 | 1.1E-04  | 1.2E-05 | 5.3E-04 |
| etot | 3 | Y | Y | 4 | M | -783.03325716931 | 1.7E-05  | 3.7E-06 | 1.3E-04 |
| etot | 4 | Y | N | 4 | M | -783.03325565572 | -1.5E-06 | 0.0E+00 | 0.0E+00 |

Energy components, in hartrees:

|     |                               |                   |       |
|-----|-------------------------------|-------------------|-------|
| (A) | Nuclear repulsion.....        | 1414.89348169850  |       |
| (E) | Total one-electron terms..... | -3874.36071585881 |       |
| (I) | Total two-electron terms..... | 1676.43397850459  |       |
| (L) | Electronic energy.....        | -2197.92673735422 | (E+I) |
| (N) | Total energy.....             | -783.03325565572  | (A+L) |

SCFE: SCF energy: HF -783.03325565572 hartrees iterations:  
4

HOMO energy: -0.30204  
LUMO energy: 0.12928

Orbital energies:

|           |           |           |           |           |           |
|-----------|-----------|-----------|-----------|-----------|-----------|
| -20.52691 | -15.60008 | -11.34577 | -11.28574 | -11.25661 | -11.24981 |
| -11.24296 | -11.24134 | -11.24052 | -11.23872 | -11.23790 | -11.23494 |
| -11.23148 | -11.23061 | -11.23017 | -11.22982 | -11.22870 | -11.22760 |
| -11.20917 | -1.39748  | -1.26943  | -1.16498  | -1.14892  | -1.10595  |
| -1.03000  | -1.01861  | -1.01779  | -1.01270  | -0.96254  | -0.93266  |
| -0.85808  | -0.83891  | -0.83326  | -0.82165  | -0.79604  | -0.74108  |
| -0.71093  | -0.69497  | -0.67280  | -0.66427  | -0.64458  | -0.63751  |
| -0.62742  | -0.61487  | -0.61223  | -0.60846  | -0.59690  | -0.58336  |
| -0.57624  | -0.55339  | -0.54873  | -0.54063  | -0.53097  | -0.51904  |
| -0.51487  | -0.50717  | -0.50097  | -0.49774  | -0.48457  | -0.46861  |
| -0.46284  | -0.42148  | -0.41148  | -0.34253  | -0.33295  | -0.32283  |
| -0.30204  | 0.12928   | 0.13401   | 0.14451   | 0.15235   | 0.20401   |
| 0.22968   | 0.24104   | 0.24885   | 0.26136   | 0.28826   |           |

end of program scf

start of program derla  
end of program derla

start of program rwr  
end of program rwr

start of program derlb

forces (hartrees/bohr) : total



| atom  | label | x             | y             | z             |
|-------|-------|---------------|---------------|---------------|
| 1     | H1    | -1.374722E-05 | 1.435022E-05  | 3.667983E-05  |
| 2     | C1    | -2.981306E-05 | 1.045379E-04  | -7.994755E-05 |
| 3     | C2    | -4.389091E-05 | 1.426727E-04  | 1.384270E-05  |
| 4     | C3    | -4.742565E-05 | 1.338239E-05  | -2.084150E-04 |
| 5     | C4    | -1.842143E-05 | 6.685988E-05  | 4.034420E-05  |
| 6     | C5    | -2.178732E-05 | 4.038942E-05  | -1.077428E-05 |
| 7     | C6    | 3.305425E-05  | 3.657757E-05  | 1.612765E-04  |
| 8     | C7    | -9.282305E-05 | -5.599587E-05 | -5.531723E-05 |
| 9     | H3    | 6.845914E-06  | -4.222507E-05 | 5.938723E-05  |
| 10    | H4    | -2.838292E-06 | -4.394467E-05 | -1.161975E-05 |
| 11    | H6    | -3.225448E-05 | 2.969290E-05  | -6.308130E-05 |
| 12    | C16   | -2.315069E-05 | -2.386888E-04 | -7.639412E-05 |
| 13    | C8    | 1.248732E-04  | 1.062989E-04  | 2.149735E-05  |
| 14    | N2    | -4.480323E-05 | 4.912833E-04  | -2.458287E-04 |
| 15    | C9    | -6.122018E-05 | 1.963679E-05  | 8.929448E-05  |
| 16    | C10   | 8.309037E-06  | 2.192258E-04  | -6.246822E-05 |
| 17    | O1    | -3.743349E-06 | -3.477971E-04 | 1.501446E-04  |
| 18    | C23   | 1.051980E-06  | 3.778395E-06  | -7.221736E-06 |
| 19    | C18   | -1.475538E-04 | 5.261771E-05  | -3.866425E-05 |
| 20    | C19   | -1.417895E-04 | 1.100661E-04  | 3.686879E-05  |
| 21    | C20   | -1.043207E-04 | -2.732564E-04 | -3.919495E-04 |
| 22    | C21   | -1.337913E-04 | -6.654643E-05 | -2.752043E-04 |
| 23    | C22   | 1.182442E-04  | 3.365282E-06  | 2.622170E-05  |
| 24    | H2    | 1.793282E-04  | 1.196664E-04  | 1.955954E-04  |
| 25    | H5    | -3.571373E-05 | 3.132209E-04  | 2.046819E-04  |
| 26    | H7    | 5.912353E-05  | 8.112120E-05  | 9.341646E-06  |
| 27    | H8    | -1.089457E-05 | 1.007190E-04  | 2.081487E-04  |
| 28    | H9    | -2.597485E-05 | 6.464382E-05  | 1.833813E-05  |
| 29    | H10   | 3.321299E-05  | 6.436604E-05  | 1.309302E-05  |
| 30    | H19   | -3.899135E-05 | 5.681417E-05  | -9.957640E-06 |
| 31    | H20   | -3.050219E-05 | 3.141103E-05  | 1.146091E-05  |
| 32    | H21   | 4.947446E-06  | 4.906085E-05  | -5.322796E-05 |
| 33    | H22   | -6.223342E-05 | 6.306798E-05  | -3.295364E-06 |
| 34    | H11   | -1.558242E-04 | -6.856842E-05 | -3.163976E-05 |
| 35    | H12   | -8.822737E-06 | -1.445679E-04 | 5.169360E-05  |
| 36    | H13   | 2.220932E-05  | -1.640889E-05 | -1.507576E-05 |
| total |       | -7.411313E-04 | 1.100827E-03  | -2.921717E-04 |

end of program derlb

start of program geopt 47

geometry optimization step 47

reading input hessian of dimension 108

in five columns format

reading input hessian of dimension 108

in five columns format

Level shifts adjusted to satisfy step-size constraints

Step size: 0.0101867

Cos(theta): 0.7160862

Final level shift: -6.2173590E-02

energy change: -5.6875E-06 \* ( 5.0000E-05 )

gradient maximum: 8.5337E-04 . ( 4.5000E-04 )

gradient rms: 1.6640E-04 \* ( 3.0000E-04 )

step size: 0.01019 trust radius: 0.01000

displacement maximum: 5.8912E-03 . ( 1.8000E-03 )

displacement rms: 9.2226E-04 \* ( 1.2000E-03 )

predicted energy change: -9.9293E-06 geom step: 1.0187E-

02 full step: 1.0187E-02

molecular structure not yet converged...

center of mass moved by:

x: -3.0518E-05

y: -4.5178E-04

z: 5.3391E-05

new geometry:

|      | angstroms     |               |               |
|------|---------------|---------------|---------------|
| atom | x             | y             | z             |
| H1   | -1.1778121898 | 1.8890343030  | -2.2326247997 |
| C1   | -1.0965283967 | 2.1214061476  | -1.1844101141 |
| C2   | -0.8845919423 | 2.6953212681  | 1.5039052127  |
| C3   | -0.8778757798 | 1.0872665291  | -0.2894942106 |
| C4   | -1.2022142923 | 3.4356443270  | -0.7600399303 |
| C5   | -1.0968545790 | 3.7145391977  | 0.5902127295  |
| C6   | -0.7673281533 | 1.3777840854  | 1.0723943448  |
| C7   | -0.7864022860 | -0.3523488711 | -0.7567410179 |
| H3   | -1.3672103755 | 4.2243834251  | -1.4716345487 |
| H4   | -1.1838860044 | 4.7267456983  | 0.9438138962  |
| H6   | -0.8176202754 | 2.9331864870  | 2.5476335121  |
| C16  | 0.6133549457  | -0.7650582649 | -1.2102176457 |
| C8   | -1.3982285468 | -1.2496312001 | 0.3420265823  |
| N2   | -0.5099899580 | 0.3378502813  | 1.9929294263  |
| C9   | -0.7832655242 | -0.9771694888 | 1.7047723787  |
| C10  | 0.0087897447  | 0.6532373301  | 3.3160901280  |
| O1   | -0.5836139907 | -1.8517234908 | 2.5001247805  |
| C23  | -1.3884866137 | -2.7413802023 | 0.0227913350  |
| C18  | 3.1414442326  | -1.5838399797 | -2.0937951388 |
| C19  | 0.7614231093  | -1.4867579530 | -2.3894897550 |
| C20  | 1.7596533891  | -0.4494837196 | -0.4853153700 |
| C21  | 3.0092186897  | -0.8577504744 | -0.9203997140 |
| C22  | 2.0113526388  | -1.8950604414 | -2.8296356151 |
| H2   | -0.1088741986 | -1.7347758618 | -2.9723816858 |
| H5   | 1.6839332016  | 0.1257508667  | 0.4190638931  |
| H7   | 3.8811491409  | -0.6043076433 | -0.3427601751 |
| H8   | 2.0986580660  | -2.4528130678 | -3.7454341696 |
| H9   | 4.1136312409  | -1.8978370461 | -2.4309207758 |
| H10  | -1.4322513714 | -0.4528713510 | -1.6226117006 |

S510

|     |               |               |               |
|-----|---------------|---------------|---------------|
| H19 | -0.3789239572 | -3.1285729786 | -0.0238300936 |
| H20 | -1.8692796644 | -2.9190359106 | -0.9346577800 |
| H21 | -1.9216621568 | -3.2930323480 | 0.7850881007  |
| H22 | -2.4353553639 | -0.9253835787 | 0.4394436238  |
| H11 | 0.8079781859  | 1.3789279782  | 3.2312250985  |
| H12 | 0.3884119981  | -0.2538700569 | 3.7540437915  |
| H13 | -0.7656199502 | 1.0542924317  | 3.9625420498  |

nuclear repulsion energy..... 1414.888983896 hartrees

-----  
 / end of geometry optimization iteration 47 /  
 -----

end of program geopt

start of program onee  
 smallest eigenvalue of S: 3.335E-04  
 number of canonical orbitals..... 368  
 end of program onee

start of program probe  
 end of program probe

start of program grid

number of gridpoints:

| atom     | H1  | C1  | C2  | C3  | C4  | C5  | C6  |
|----------|-----|-----|-----|-----|-----|-----|-----|
| C7       |     |     |     |     |     |     |     |
| grid # 1 | 72  | 87  | 89  | 89  | 89  | 88  | 83  |
| 81       |     |     |     |     |     |     |     |
| grid # 2 | 116 | 97  | 96  | 98  | 97  | 97  | 95  |
| 90       |     |     |     |     |     |     |     |
| grid # 3 | 217 | 182 | 184 | 194 | 183 | 184 | 189 |
| 177      |     |     |     |     |     |     |     |
| grid # 4 | 216 | 326 | 328 | 338 | 328 | 328 | 326 |
| 314      |     |     |     |     |     |     |     |

number of gridpoints:

| atom     | H3  | H4  | H6  | C16 | C8  | N2  | C9  |
|----------|-----|-----|-----|-----|-----|-----|-----|
| C10      |     |     |     |     |     |     |     |
| grid # 1 | 73  | 73  | 70  | 92  | 82  | 95  | 82  |
| 70       |     |     |     |     |     |     |     |
| grid # 2 | 118 | 118 | 112 | 100 | 90  | 105 | 92  |
| 79       |     |     |     |     |     |     |     |
| grid # 3 | 223 | 223 | 207 | 194 | 174 | 211 | 176 |
| 143      |     |     |     |     |     |     |     |
| grid # 4 | 224 | 223 | 208 | 342 | 311 | 387 | 293 |
| 273      |     |     |     |     |     |     |     |

```

number of gridpoints:
  atom      01      C23      C18      C19      C20      C21      C22
H2
  grid # 1      111      74      89      88      88      89      89
71
  grid # 2      123      79      97      95      96      97      96
112
  grid # 3      257      149      183      183      182      184      183
212
  grid # 4      450      286      327      326      327      327      327
211

```

```

number of gridpoints:
  atom      H5      H7      H8      H9      H10      H19      H20
H21
  grid # 1      71      73      73      73      66      71      71
70
  grid # 2      111      118      118      118      106      108      110
108
  grid # 3      212      223      223      224      203      218      217
217
  grid # 4      207      223      224      224      196      212      216
215

```

```

number of gridpoints:
  atom      H22      H11      H12      H13      total
grid # 1      69      71      70      71      2863
grid # 2      110      109      107      111      3729
grid # 3      214      214      212      217      7188
grid # 4      211      211      209      218      9912

```

end of program grid

start of program rwr  
end of program rwr

start of program scf

|      | i | u | d | i | g |                  | energy  | RMS     | maximum |
|------|---|---|---|---|---|------------------|---------|---------|---------|
|      | t | p | i | c | r |                  | change  | density | DIIS    |
|      | e | d | i | u | i | total energy     |         | change  | error   |
|      | r | t | s | t | d |                  |         |         |         |
| etot | 1 | N | N | 1 | U | -783.03312955143 |         | 2.6E-05 | 1.3E-03 |
| etot | 2 | Y | Y | 4 | M | -783.03323308852 | 1.0E-04 | 1.2E-05 | 5.4E-04 |
| etot | 3 | Y | Y | 4 | M | -783.03324630294 | 1.3E-05 | 3.7E-06 | 1.3E-04 |
| etot | 4 | Y | N | 4 | M | -783.03324993704 | 3.6E-06 | 0.0E+00 | 0.0E+00 |

Energy components, in hartrees:

(A) Nuclear repulsion..... 1414.88898389647  
 (E) Total one-electron terms..... -3874.34269638044  
 (I) Total two-electron terms..... 1676.42046254694  
 (L) Electronic energy..... -2197.92223383350 (E+I)  
 (N) Total energy..... -783.03324993704 (A+L)

SCFE: SCF energy: HF -783.03324993704 hartrees iterations:  
 4

HOMO energy: -0.30211  
 LUMO energy: 0.12929

Orbital energies:

|           |           |           |           |           |           |
|-----------|-----------|-----------|-----------|-----------|-----------|
| -20.52663 | -15.60057 | -11.34618 | -11.28619 | -11.25659 | -11.25010 |
| -11.24315 | -11.24175 | -11.24055 | -11.23855 | -11.23794 | -11.23494 |
| -11.23121 | -11.23056 | -11.23000 | -11.22954 | -11.22851 | -11.22781 |
| -11.20909 | -1.39728  | -1.26969  | -1.16516  | -1.14903  | -1.10607  |
| -1.03012  | -1.01872  | -1.01796  | -1.01270  | -0.96257  | -0.93279  |
| -0.85822  | -0.83900  | -0.83338  | -0.82172  | -0.79613  | -0.74121  |
| -0.71100  | -0.69502  | -0.67285  | -0.66436  | -0.64468  | -0.63756  |
| -0.62743  | -0.61493  | -0.61225  | -0.60860  | -0.59692  | -0.58330  |
| -0.57639  | -0.55348  | -0.54885  | -0.54068  | -0.53095  | -0.51904  |
| -0.51483  | -0.50723  | -0.50111  | -0.49778  | -0.48458  | -0.46869  |
| -0.46290  | -0.42162  | -0.41154  | -0.34266  | -0.33292  | -0.32298  |
| -0.30211  | 0.12929   | 0.13404   | 0.14443   | 0.15222   | 0.20387   |
| 0.22971   | 0.24095   | 0.24893   | 0.26128   | 0.28804   |           |

end of program scf

start of program derla  
 end of program derla

start of program rwr  
 end of program rwr

start of program der1b

forces (hartrees/bohr) : total

| atom | label | x             | y             | z             |
|------|-------|---------------|---------------|---------------|
| ---- | ----- | -----         | -----         | -----         |
| 1    | H1    | -2.592724E-05 | 4.738559E-05  | -5.364591E-05 |
| 2    | C1    | -9.535754E-06 | -4.117227E-05 | 6.429322E-05  |
| 3    | C2    | -8.240798E-06 | -8.645907E-05 | -2.898460E-05 |
| 4    | C3    | 1.634745E-05  | 4.746618E-05  | 1.855231E-04  |
| 5    | C4    | -2.257082E-05 | -8.670732E-06 | -5.793941E-05 |
| 6    | C5    | -1.720519E-05 | 1.986566E-05  | -2.422401E-06 |
| 7    | C6    | -5.865622E-05 | 3.006689E-05  | -1.884450E-04 |

|       |       |               |               |               |
|-------|-------|---------------|---------------|---------------|
| 8     | C7    | 4.191138E-05  | 1.094097E-04  | 4.019336E-05  |
| 9     | H3    | -4.683814E-05 | 1.043592E-04  | -7.516165E-05 |
| 10    | H4    | -3.782913E-05 | 1.038869E-04  | -3.064837E-06 |
| 11    | H6    | -1.192879E-05 | 2.970364E-05  | 4.738680E-05  |
| 12    | C16   | -2.313426E-05 | 2.885947E-04  | 7.407104E-05  |
| 13    | C8    | -1.586582E-04 | -4.360001E-05 | -3.669174E-05 |
| 14    | N2    | -1.525597E-05 | -4.374815E-04 | 2.258186E-04  |
| 15    | C9    | 9.742382E-06  | 4.555393E-05  | -1.012777E-04 |
| 16    | C10   | -4.430324E-05 | -1.884428E-04 | 6.155559E-05  |
| 17    | O1    | -3.739803E-05 | 4.112932E-04  | -1.632512E-04 |
| 18    | C23   | -4.153922E-05 | 5.760009E-05  | -1.453023E-05 |
| 19    | C18   | 1.140321E-04  | 7.277799E-06  | 2.290338E-05  |
| 20    | C19   | 9.971514E-05  | -4.316332E-05 | -5.878721E-05 |
| 21    | C20   | 6.018633E-05  | 3.426950E-04  | 3.846746E-04  |
| 22    | C21   | 9.886890E-05  | 1.311615E-04  | 2.639256E-04  |
| 23    | C22   | -1.609215E-04 | 5.729772E-05  | -4.554545E-05 |
| 24    | H2    | -2.248613E-04 | -5.859888E-05 | -2.201316E-04 |
| 25    | H5    | -4.328266E-06 | -2.618403E-04 | -2.232932E-04 |
| 26    | H7    | -1.006717E-04 | -2.741190E-05 | -2.108856E-05 |
| 27    | H8    | -2.989899E-05 | -4.603152E-05 | -2.333796E-04 |
| 28    | H9    | -1.472198E-05 | -6.531845E-06 | -3.443776E-05 |
| 29    | H10   | -7.231768E-05 | -4.352805E-06 | -3.188010E-05 |
| 30    | H19   | -3.013121E-06 | 1.365052E-06  | -7.078438E-06 |
| 31    | H20   | -1.268627E-05 | 2.886360E-05  | -3.158476E-05 |
| 32    | H21   | -5.007193E-05 | 7.493649E-06  | 3.567460E-05  |
| 33    | H22   | 1.784926E-05  | -5.056923E-06 | -1.429418E-05 |
| 34    | H11   | 1.035301E-04  | 1.349190E-04  | 1.776380E-05  |
| 35    | H12   | -2.910566E-05 | 2.061435E-04  | -6.714745E-05 |
| 36    | H13   | -5.016299E-05 | 6.802679E-05  | -3.091807E-06 |
| ----- |       | -----         | -----         | -----         |
|       | total | -7.495994E-04 | 1.021616E-03  | -2.933711E-04 |

end of program der1b

start of program geopt 48

geometry optimization step 48

reading input hessian of dimension 108

in five columns format

reading input hessian of dimension 108

in five columns format

Level shifts adjusted to satisfy step-size constraints

Step size: 0.0102575

Cos(theta): 0.7297533

Final level shift: -6.7425209E-02

energy change: 5.7187E-06 \* ( 5.0000E-05 )

gradient maximum: 8.6762E-04 . ( 4.5000E-04 )

gradient rms: 1.6996E-04 \* ( 3.0000E-04 )  
 step size: 0.01026 trust radius: 0.01000  
 displacement maximum: 5.9312E-03 . ( 1.8000E-03 )  
 displacement rms: 9.2867E-04 \* ( 1.2000E-03 )  
 predicted energy change: -1.0573E-05 geom step: 1.0258E-  
 02 full step: 1.0258E-02  
 molecular structure not yet converged...

center of mass moved by:  
 x: 1.7185E-05 y: 4.5860E-04 z: -4.7243E-05

new geometry:

|      | angstroms     |               |               |
|------|---------------|---------------|---------------|
| atom | x             | y             | z             |
| H1   | -1.1804020219 | 1.8878654324  | -2.2327960356 |
| C1   | -1.0989024297 | 2.1207542006  | -1.1846361268 |
| C2   | -0.8862758939 | 2.6958662600  | 1.5030965429  |
| C3   | -0.8785397887 | 1.0873097429  | -0.2893003140 |
| C4   | -1.2060514031 | 3.4350639823  | -0.7610717202 |
| C5   | -1.1002889302 | 3.7145833482  | 0.5890809071  |
| C6   | -0.7677749682 | 1.3782883375  | 1.0721370327  |
| C7   | -0.7861183547 | -0.3520585285 | -0.7565898484 |
| H3   | -1.3725791126 | 4.2233552018  | -1.4730812957 |
| H4   | -1.1885169840 | 4.7269686379  | 0.9422181395  |
| H6   | -0.8189607512 | 2.9341026943  | 2.5468242049  |
| C16  | 0.6136448512  | -0.7638526144 | -1.2106550505 |
| C8   | -1.3971720621 | -1.2498731566 | 0.3422799256  |
| N2   | -0.5089451168 | 0.3386823184  | 1.9930443293  |
| C9   | -0.7814879789 | -0.9760209907 | 1.7045754320  |
| C10  | 0.0110918852  | 0.6561146997  | 3.3152313388  |
| O1   | -0.5803365035 | -1.8493884743 | 2.5003510636  |
| C23  | -1.3858820186 | -2.7416469258 | 0.0237755021  |
| C18  | 3.1407485133  | -1.5869549409 | -2.0927949910 |
| C19  | 0.7616822142  | -1.4795692921 | -2.3942274276 |
| C20  | 1.7593574054  | -0.4573761764 | -0.4801902619 |
| C21  | 3.0085121210  | -0.8680468254 | -0.9145423921 |
| C22  | 2.0112436165  | -1.8892291084 | -2.8340412322 |
| H2   | -0.1084782958 | -1.7223369362 | -2.9808848268 |
| H5   | 1.6830488478  | 0.1090473790  | 0.4287159209  |
| H7   | 3.8796271483  | -0.6226514103 | -0.3326772403 |
| H8   | 2.0986992437  | -2.4415086204 | -3.7537541595 |
| H9   | 4.1123871646  | -1.9030068003 | -2.4296209546 |
| H10  | -1.4325749945 | -0.4533349899 | -1.6220625104 |
| H19  | -0.3759410599 | -3.1283106479 | -0.0213026287 |
| H20  | -1.8650395553 | -2.9199431934 | -0.9343879061 |
| H21  | -1.9197826448 | -3.2933711651 | 0.7856877655  |
| H22  | -2.4344329674 | -0.9266735849 | 0.4399391278  |
| H11  | 0.8095113671  | 1.3830992876  | 3.2286842424  |
| H12  | 0.3929242550  | -0.2492362420 | 3.7536883933  |
| H13  | -0.7631991565 | 1.0572189713  | 3.9618937245  |

nuclear repulsion energy..... 1414.892904068 hartrees

-----  
/ end of geometry optimization iteration 48 /  
-----

end of program geopt

start of program onee  
smallest eigenvalue of S: 3.334E-04  
number of canonical orbitals..... 368  
end of program onee

start of program probe  
end of program probe

start of program grid

number of gridpoints:

|     | atom     | H1  | C1  | C2  | C3  | C4  | C5  | C6  |
|-----|----------|-----|-----|-----|-----|-----|-----|-----|
| C7  |          |     |     |     |     |     |     |     |
|     | grid # 1 | 72  | 87  | 89  | 90  | 89  | 88  | 84  |
| 81  |          |     |     |     |     |     |     |     |
|     | grid # 2 | 116 | 97  | 96  | 98  | 97  | 97  | 94  |
| 90  |          |     |     |     |     |     |     |     |
|     | grid # 3 | 217 | 182 | 184 | 194 | 183 | 184 | 189 |
| 177 |          |     |     |     |     |     |     |     |
|     | grid # 4 | 216 | 326 | 328 | 338 | 328 | 328 | 323 |
| 314 |          |     |     |     |     |     |     |     |

number of gridpoints:

|     | atom     | H3  | H4  | H6  | C16 | C8  | N2  | C9  |
|-----|----------|-----|-----|-----|-----|-----|-----|-----|
| C10 |          |     |     |     |     |     |     |     |
|     | grid # 1 | 73  | 73  | 70  | 92  | 82  | 95  | 82  |
| 69  |          |     |     |     |     |     |     |     |
|     | grid # 2 | 118 | 118 | 112 | 100 | 90  | 105 | 92  |
| 78  |          |     |     |     |     |     |     |     |
|     | grid # 3 | 223 | 223 | 207 | 194 | 174 | 211 | 176 |
| 146 |          |     |     |     |     |     |     |     |
|     | grid # 4 | 224 | 223 | 208 | 342 | 311 | 387 | 293 |
| 276 |          |     |     |     |     |     |     |     |

number of gridpoints:

|     | atom     | O1  | C23 | C18 | C19 | C20 | C21 | C22 |
|-----|----------|-----|-----|-----|-----|-----|-----|-----|
| H2  |          |     |     |     |     |     |     |     |
|     | grid # 1 | 111 | 74  | 89  | 88  | 88  | 89  | 89  |
| 71  |          |     |     |     |     |     |     |     |
|     | grid # 2 | 123 | 80  | 97  | 95  | 96  | 97  | 96  |
| 112 |          |     |     |     |     |     |     |     |
|     | grid # 3 | 257 | 150 | 183 | 183 | 182 | 184 | 183 |
| 212 |          |     |     |     |     |     |     |     |



grid # 4      450      285      327      326      327      327      327  
 211

number of gridpoints:

| atom     | H5  | H7  | H8  | H9  | H10 | H19 | H20 |
|----------|-----|-----|-----|-----|-----|-----|-----|
| grid # 1 | 71  | 73  | 73  | 73  | 66  | 71  | 71  |
| grid # 2 | 111 | 118 | 118 | 118 | 106 | 108 | 110 |
| grid # 3 | 212 | 223 | 223 | 224 | 202 | 218 | 216 |
| grid # 4 | 207 | 223 | 224 | 224 | 196 | 212 | 216 |

number of gridpoints:

| atom     | H22 | H11 | H12 | H13 | total |
|----------|-----|-----|-----|-----|-------|
| grid # 1 | 69  | 71  | 70  | 71  | 2864  |
| grid # 2 | 110 | 109 | 108 | 111 | 3729  |
| grid # 3 | 214 | 213 | 212 | 217 | 7189  |
| grid # 4 | 211 | 211 | 209 | 218 | 9911  |

end of program grid

start of program rwr

end of program rwr

start of program scf

|      | i | u | d | i | g |                  | RMS      | maximum |
|------|---|---|---|---|---|------------------|----------|---------|
|      | t | p | i | c | r |                  | energy   | DIIS    |
|      | e | d | i | u | i | total energy     | density  | error   |
|      | r | t | s | t | d |                  | change   |         |
| etot | 1 | N | N | 1 | U | -783.03313441972 | 2.6E-05  | 1.3E-03 |
| etot | 2 | Y | Y | 4 | M | -783.03324005258 | 1.1E-04  | 5.3E-04 |
| etot | 3 | Y | Y | 4 | M | -783.03325706295 | 1.7E-05  | 1.3E-04 |
| etot | 4 | Y | N | 4 | M | -783.03325550569 | -1.6E-06 | 0.0E+00 |

Energy components, in hartrees:

|     |                               |                   |       |
|-----|-------------------------------|-------------------|-------|
| (A) | Nuclear repulsion.....        | 1414.89290406796  |       |
| (E) | Total one-electron terms..... | -3874.35956759017 |       |
| (I) | Total two-electron terms..... | 1676.43340801652  |       |
| (L) | Electronic energy.....        | -2197.92615957365 | (E+I) |
| (N) | Total energy.....             | -783.03325550569  | (A+L) |

SCFE: SCF energy: HF      -783.03325550569 hartrees      iterations:

4

HOMO energy: -0.30204  
LUMO energy: 0.12928

Orbital energies:

|           |           |           |           |           |           |
|-----------|-----------|-----------|-----------|-----------|-----------|
| -20.52691 | -15.60008 | -11.34577 | -11.28574 | -11.25661 | -11.24981 |
| -11.24296 | -11.24134 | -11.24052 | -11.23872 | -11.23790 | -11.23494 |
| -11.23148 | -11.23062 | -11.23017 | -11.22982 | -11.22870 | -11.22760 |
| -11.20917 | -1.39748  | -1.26943  | -1.16498  | -1.14892  | -1.10594  |
| -1.03000  | -1.01861  | -1.01779  | -1.01270  | -0.96254  | -0.93266  |
| -0.85808  | -0.83891  | -0.83326  | -0.82165  | -0.79604  | -0.74108  |
| -0.71093  | -0.69497  | -0.67280  | -0.66427  | -0.64458  | -0.63751  |
| -0.62742  | -0.61487  | -0.61223  | -0.60846  | -0.59690  | -0.58336  |
| -0.57624  | -0.55339  | -0.54873  | -0.54063  | -0.53097  | -0.51905  |
| -0.51487  | -0.50717  | -0.50097  | -0.49774  | -0.48457  | -0.46861  |
| -0.46284  | -0.42148  | -0.41148  | -0.34253  | -0.33295  | -0.32284  |
| -0.30204  | 0.12928   | 0.13401   | 0.14451   | 0.15235   | 0.20401   |
| 0.22968   | 0.24104   | 0.24886   | 0.26136   | 0.28826   |           |

end of program scf

start of program derla  
end of program derla

start of program rwr  
end of program rwr

start of program derlb

forces (hartrees/bohr) : total

| atom | label | x             | y             | z             |
|------|-------|---------------|---------------|---------------|
| 1    | H1    | -1.374094E-05 | 1.428308E-05  | 3.678924E-05  |
| 2    | C1    | -2.976425E-05 | 1.043472E-04  | -7.981611E-05 |
| 3    | C2    | -4.274820E-05 | 1.427553E-04  | 1.377841E-05  |
| 4    | C3    | -4.834898E-05 | 1.350085E-05  | -2.084144E-04 |
| 5    | C4    | -1.830678E-05 | 6.684689E-05  | 4.048000E-05  |
| 6    | C5    | -2.189754E-05 | 4.014377E-05  | -1.074118E-05 |
| 7    | C6    | 3.155117E-05  | 3.607113E-05  | 1.620982E-04  |
| 8    | C7    | -9.209072E-05 | -5.594169E-05 | -5.531487E-05 |
| 9    | H3    | 6.903323E-06  | -4.229398E-05 | 5.950008E-05  |
| 10   | H4    | -2.819135E-06 | -4.401043E-05 | -1.153511E-05 |
| 11   | H6    | -3.197335E-05 | 2.949138E-05  | -6.299610E-05 |
| 12   | C16   | -2.275321E-05 | -2.386365E-04 | -7.697404E-05 |
| 13   | C8    | 1.241506E-04  | 1.062405E-04  | 2.188466E-05  |
| 14   | N2    | -4.355120E-05 | 4.913537E-04  | -2.448509E-04 |
| 15   | C9    | -6.002501E-05 | 1.910663E-05  | 8.871172E-05  |
| 16   | C10   | 7.611018E-06  | 2.210285E-04  | -6.395030E-05 |

S518

|       |       |               |               |               |
|-------|-------|---------------|---------------|---------------|
| 17    | O1    | -3.966842E-06 | -3.481801E-04 | 1.494600E-04  |
| 18    | C23   | 7.992412E-07  | 3.805490E-06  | -7.062397E-06 |
| 19    | C18   | -1.483003E-04 | 5.281095E-05  | -3.856095E-05 |
| 20    | C19   | -1.414597E-04 | 1.101433E-04  | 3.709553E-05  |
| 21    | C20   | -1.040785E-04 | -2.736102E-04 | -3.924379E-04 |
| 22    | C21   | -1.340463E-04 | -6.693595E-05 | -2.757977E-04 |
| 23    | C22   | 1.187189E-04  | 3.502178E-06  | 2.650154E-05  |
| 24    | H2    | 1.794333E-04  | 1.196351E-04  | 1.958112E-04  |
| 25    | H5    | -3.578795E-05 | 3.132449E-04  | 2.047664E-04  |
| 26    | H7    | 5.889452E-05  | 8.120446E-05  | 9.085483E-06  |
| 27    | H8    | -1.095325E-05 | 1.010331E-04  | 2.089246E-04  |
| 28    | H9    | -2.606901E-05 | 6.472350E-05  | 1.844767E-05  |
| 29    | H10   | 3.300206E-05  | 6.439903E-05  | 1.318336E-05  |
| 30    | H19   | -3.890053E-05 | 5.678424E-05  | -9.941576E-06 |
| 31    | H20   | -3.035856E-05 | 3.147628E-05  | 1.151984E-05  |
| 32    | H21   | 5.083246E-06  | 4.924626E-05  | -5.329808E-05 |
| 33    | H22   | -6.191764E-05 | 6.315510E-05  | -3.347798E-06 |
| 34    | H11   | -1.546144E-04 | -6.938276E-05 | -3.170349E-05 |
| 35    | H12   | -9.278418E-06 | -1.446579E-04 | 5.154111E-05  |
| 36    | H13   | 2.059595E-05  | -1.576104E-05 | -1.495362E-05 |
| ----- |       | -----         | -----         | -----         |
|       | total | -7.410075E-04 | 1.100922E-03  | -2.921176E-04 |

end of program derlb

start of program geopt 49

geometry optimization step 49

reading input hessian of dimension 108

in five columns format

reading input hessian of dimension 108

in five columns format

Level shifts adjusted to satisfy step-size constraints

Step size: 0.0101888

Cos(theta): 0.7164571

Final level shift: -6.2308517E-02

energy change: -5.5687E-06 \* ( 5.0000E-05 )

gradient maximum: 8.5395E-04 . ( 4.5000E-04 )

gradient rms: 1.6649E-04 \* ( 3.0000E-04 )

step size: 0.01019 trust radius: 0.01000

displacement maximum: 5.8911E-03 . ( 1.8000E-03 )

displacement rms: 9.2245E-04 \* ( 1.2000E-03 )

predicted energy change: -9.9462E-06 geom step: 1.0189E-

02 full step: 1.0189E-02

molecular structure not yet converged...

center of mass moved by:

x: -2.9157E-05 y: -4.5250E-04 z: 5.2721E-05

new geometry:

|      | angstroms     |               |               |
|------|---------------|---------------|---------------|
| atom | x             | y             | z             |
| H1   | -1.1777873031 | 1.8890534233  | -2.2326433005 |
| C1   | -1.0965208299 | 2.1214209574  | -1.1844262261 |
| C2   | -0.8846598180 | 2.6953266249  | 1.5038992819  |
| C3   | -0.8778517744 | 1.0872828329  | -0.2895116848 |
| C4   | -1.2022513242 | 3.4356534154  | -0.7600487784 |
| C5   | -1.0969358926 | 3.7145440410  | 0.5902089926  |
| C6   | -0.7673246952 | 1.3778004046  | 1.0723776061  |
| C7   | -0.7863822285 | -0.3523369228 | -0.7567489120 |
| H3   | -1.3672586339 | 4.2243916973  | -1.4716419361 |
| H4   | -1.1840190457 | 4.7267447288  | 0.9438138295  |
| H6   | -0.8177385502 | 2.9331788258  | 2.5476348920  |
| C16  | 0.6133746411  | -0.7650688679 | -1.2102046732 |
| C8   | -1.3982408656 | -1.2496059753 | 0.3420144785  |
| N2   | -0.5099629628 | 0.3378644275  | 1.9929052660  |
| C9   | -0.7832956038 | -0.9771448788 | 1.7047695127  |
| C10  | 0.0089166219  | 0.6532223060  | 3.3160367395  |
| O1   | -0.5836836281 | -1.8516892722 | 2.5001430785  |
| C23  | -1.3885110351 | -2.7413571986 | 0.0227866891  |
| C18  | 3.1414619079  | -1.5838936719 | -2.0937530744 |
| C19  | 0.7614487390  | -1.4867380938 | -2.3894956401 |
| C20  | 1.7596670084  | -0.4495443691 | -0.4852700174 |
| C21  | 3.0092307177  | -0.8578339047 | -0.9203390215 |
| C22  | 2.0113771878  | -1.8950611329 | -2.8296278900 |
| H2   | -0.1088430027 | -1.7347151171 | -2.9724141015 |
| H5   | 1.6839437511  | 0.1256668845  | 0.4191233128  |
| H7   | 3.8811558350  | -0.6044337885 | -0.3426720292 |
| H8   | 2.0986868442  | -2.4527880580 | -3.7454426755 |
| H9   | 4.1136474152  | -1.8979084312 | -2.4308667050 |
| H10  | -1.4322184566 | -0.4528553947 | -1.6226294530 |
| H19  | -0.3789518713 | -3.1285608775 | -0.0238226035 |
| H20  | -1.8692960468 | -2.9190126722 | -0.9346667199 |
| H21  | -1.9217007830 | -3.2930001938 | 0.7850806648  |
| H22  | -2.4353665120 | -0.9253467710 | 0.4394093949  |
| H11  | 0.8079272435  | 1.3791004544  | 3.2311328952  |
| H12  | 0.3888019816  | -0.2538440821 | 3.7538500570  |
| H13  | -0.7654879489 | 1.0540388559  | 3.9626410377  |

nuclear repulsion energy..... 1414.888433943 hartrees

-----  
/ end of geometry optimization iteration 49 /  
-----

end of program geopt

start of program onee  
smallest eigenvalue of S: 3.335E-04

S520

number of canonical orbitals..... 368  
end of program onee

start of program probe  
end of program probe

start of program grid

number of gridpoints:

| atom     | H1  | C1  | C2  | C3  | C4  | C5  | C6  |
|----------|-----|-----|-----|-----|-----|-----|-----|
| C7       |     |     |     |     |     |     |     |
| grid # 1 | 72  | 87  | 89  | 89  | 89  | 88  | 83  |
| 81       |     |     |     |     |     |     |     |
| grid # 2 | 116 | 97  | 96  | 98  | 97  | 97  | 95  |
| 90       |     |     |     |     |     |     |     |
| grid # 3 | 217 | 182 | 184 | 194 | 183 | 184 | 189 |
| 177      |     |     |     |     |     |     |     |
| grid # 4 | 216 | 326 | 328 | 338 | 328 | 328 | 326 |
| 314      |     |     |     |     |     |     |     |

number of gridpoints:

| atom     | H3  | H4  | H6  | C16 | C8  | N2  | C9  |
|----------|-----|-----|-----|-----|-----|-----|-----|
| C10      |     |     |     |     |     |     |     |
| grid # 1 | 73  | 73  | 70  | 92  | 82  | 95  | 82  |
| 70       |     |     |     |     |     |     |     |
| grid # 2 | 118 | 118 | 112 | 100 | 90  | 105 | 92  |
| 79       |     |     |     |     |     |     |     |
| grid # 3 | 223 | 223 | 207 | 194 | 174 | 211 | 176 |
| 143      |     |     |     |     |     |     |     |
| grid # 4 | 224 | 223 | 208 | 342 | 311 | 387 | 293 |
| 273      |     |     |     |     |     |     |     |

number of gridpoints:

| atom     | O1  | C23 | C18 | C19 | C20 | C21 | C22 |
|----------|-----|-----|-----|-----|-----|-----|-----|
| H2       |     |     |     |     |     |     |     |
| grid # 1 | 111 | 74  | 89  | 88  | 88  | 89  | 89  |
| 71       |     |     |     |     |     |     |     |
| grid # 2 | 123 | 79  | 97  | 95  | 96  | 97  | 96  |
| 112      |     |     |     |     |     |     |     |
| grid # 3 | 257 | 149 | 183 | 183 | 182 | 184 | 183 |
| 212      |     |     |     |     |     |     |     |
| grid # 4 | 450 | 286 | 327 | 326 | 327 | 327 | 327 |
| 211      |     |     |     |     |     |     |     |

number of gridpoints:

| atom     | H5 | H7 | H8 | H9 | H10 | H19 | H20 |
|----------|----|----|----|----|-----|-----|-----|
| H21      |    |    |    |    |     |     |     |
| grid # 1 | 71 | 73 | 73 | 73 | 66  | 71  | 71  |
| 70       |    |    |    |    |     |     |     |

```

  grid # 2      111    118    118    118    106    108    110
108
  grid # 3      212    223    223    224    203    218    217
217
  grid # 4      207    223    224    224    196    212    216
215

```

number of gridpoints:

| atom     | H22 | H11 | H12 | H13 | total |
|----------|-----|-----|-----|-----|-------|
| grid # 1 | 69  | 71  | 70  | 71  | 2863  |
| grid # 2 | 110 | 109 | 107 | 111 | 3729  |
| grid # 3 | 214 | 214 | 212 | 217 | 7188  |
| grid # 4 | 211 | 211 | 209 | 218 | 9912  |

end of program grid

start of program rwr  
end of program rwr

start of program scf

|      | i | u | d | i | g |                  | energy  | RMS     | maximum |
|------|---|---|---|---|---|------------------|---------|---------|---------|
|      | t | p | i | c | r |                  | change  | density | DIIS    |
|      | e | d | i | u | i | total energy     |         | change  | error   |
|      | r | t | s | t | d |                  |         |         |         |
| etot | 1 | N | N | 1 | U | -783.03312941788 |         | 2.6E-05 | 1.3E-03 |
| etot | 2 | Y | Y | 4 | M | -783.03323292850 | 1.0E-04 | 1.2E-05 | 5.4E-04 |
| etot | 3 | Y | Y | 4 | M | -783.03324616135 | 1.3E-05 | 3.7E-06 | 1.3E-04 |
| etot | 4 | Y | N | 4 | M | -783.03324965978 | 3.5E-06 | 0.0E+00 | 0.0E+00 |

Energy components, in hartrees:

|     |                               |                   |       |
|-----|-------------------------------|-------------------|-------|
| (A) | Nuclear repulsion.....        | 1414.88843394285  |       |
| (E) | Total one-electron terms..... | -3874.34159995875 |       |
| (I) | Total two-electron terms..... | 1676.41991635612  |       |
| (L) | Electronic energy.....        | -2197.92168360263 | (E+I) |
| (N) | Total energy.....             | -783.03324965978  | (A+L) |

SCFE: SCF energy: HF -783.03324965978 hartrees iterations:  
4

HOMO energy: -0.30211  
LUMO energy: 0.12929

Orbital energies:

|           |           |           |           |           |           |
|-----------|-----------|-----------|-----------|-----------|-----------|
| -20.52663 | -15.60057 | -11.34617 | -11.28619 | -11.25659 | -11.25010 |
| -11.24315 | -11.24175 | -11.24056 | -11.23855 | -11.23794 | -11.23494 |
| -11.23121 | -11.23056 | -11.23000 | -11.22954 | -11.22851 | -11.22781 |

|           |          |          |          |          |          |
|-----------|----------|----------|----------|----------|----------|
| -11.20909 | -1.39728 | -1.26969 | -1.16516 | -1.14903 | -1.10607 |
| -1.03012  | -1.01872 | -1.01796 | -1.01270 | -0.96257 | -0.93279 |
| -0.85822  | -0.83900 | -0.83338 | -0.82172 | -0.79613 | -0.74121 |
| -0.71100  | -0.69502 | -0.67285 | -0.66436 | -0.64468 | -0.63756 |
| -0.62743  | -0.61493 | -0.61225 | -0.60860 | -0.59692 | -0.58330 |
| -0.57639  | -0.55348 | -0.54885 | -0.54068 | -0.53095 | -0.51904 |
| -0.51483  | -0.50723 | -0.50111 | -0.49778 | -0.48458 | -0.46869 |
| -0.46290  | -0.42161 | -0.41154 | -0.34266 | -0.33293 | -0.32298 |
| -0.30211  | 0.12929  | 0.13404  | 0.14443  | 0.15222  | 0.20387  |
| 0.22971   | 0.24095  | 0.24893  | 0.26128  | 0.28804  |          |

end of program scf

start of program derla  
end of program derla

start of program rwr  
end of program rwr

start of program derlb

forces (hartrees/bohr) : total

| atom | label | x             | y             | z             |
|------|-------|---------------|---------------|---------------|
| 1    | H1    | -2.592608E-05 | 4.732803E-05  | -5.355182E-05 |
| 2    | C1    | -9.475848E-06 | -4.145662E-05 | 6.443900E-05  |
| 3    | C2    | -7.193273E-06 | -8.636665E-05 | -2.900163E-05 |
| 4    | C3    | 1.554508E-05  | 4.753995E-05  | 1.856340E-04  |
| 5    | C4    | -2.247090E-05 | -8.627248E-06 | -5.778068E-05 |
| 6    | C5    | -1.733481E-05 | 1.973921E-05  | -2.518020E-06 |
| 7    | C6    | -5.998248E-05 | 2.940101E-05  | -1.877519E-04 |
| 8    | C7    | 4.253817E-05  | 1.094845E-04  | 4.014761E-05  |
| 9    | H3    | -4.680272E-05 | 1.043327E-04  | -7.507083E-05 |
| 10   | H4    | -3.783413E-05 | 1.038886E-04  | -2.961813E-06 |
| 11   | H6    | -1.166691E-05 | 2.953540E-05  | 4.753827E-05  |
| 12   | C16   | -2.268233E-05 | 2.885075E-04  | 7.330086E-05  |
| 13   | C8    | -1.593011E-04 | -4.362636E-05 | -3.633449E-05 |
| 14   | N2    | -1.420186E-05 | -4.375676E-04 | 2.266601E-04  |
| 15   | C9    | 1.074064E-05  | 4.515209E-05  | -1.018360E-04 |
| 16   | C10   | -4.466173E-05 | -1.865961E-04 | 6.009028E-05  |
| 17   | O1    | -3.753467E-05 | 4.110224E-04  | -1.638338E-04 |
| 18   | C23   | -4.175842E-05 | 5.757407E-05  | -1.443524E-05 |
| 19   | C18   | 1.133071E-04  | 7.361266E-06  | 2.289409E-05  |
| 20   | C19   | 1.001185E-04  | -4.308707E-05 | -5.851173E-05 |
| 21   | C20   | 6.038344E-05  | 3.423298E-04  | 3.842122E-04  |
| 22   | C21   | 9.862001E-05  | 1.309287E-04  | 2.636499E-04  |
| 23   | C22   | -1.608860E-04 | 5.750478E-05  | -4.527604E-05 |
| 24   | H2    | -2.246100E-04 | -5.857053E-05 | -2.198800E-04 |

|       |       |               |               |               |
|-------|-------|---------------|---------------|---------------|
| 25    | H5    | -4.410337E-06 | -2.617838E-04 | -2.231456E-04 |
| 26    | H7    | -1.008692E-04 | -2.732879E-05 | -2.129666E-05 |
| 27    | H8    | -2.990791E-05 | -4.577584E-05 | -2.327820E-04 |
| 28    | H9    | -1.472450E-05 | -6.500511E-06 | -3.437616E-05 |
| 29    | H10   | -7.248776E-05 | -4.328403E-06 | -3.175907E-05 |
| 30    | H19   | -3.005584E-06 | 1.379870E-06  | -7.054430E-06 |
| 31    | H20   | -1.255258E-05 | 2.889833E-05  | -3.151539E-05 |
| 32    | H21   | -4.991861E-05 | 7.688394E-06  | 3.556840E-05  |
| 33    | H22   | 1.816219E-05  | -5.003267E-06 | -1.434331E-05 |
| 34    | H11   | 1.045549E-04  | 1.342958E-04  | 1.771052E-05  |
| 35    | H12   | -2.966117E-05 | 2.059216E-04  | -6.724378E-05 |
| 36    | H13   | -5.161293E-05 | 6.858142E-05  | -2.891794E-06 |
| ----- |       | -----         | -----         | -----         |
|       | total | -7.495037E-04 | 1.021777E-03  | -2.933070E-04 |

end of program derlb

start of program geopt 50

geometry optimization step 50

reading input hessian of dimension 108  
in five columns format  
reading input hessian of dimension 108  
in five columns format

Level shifts adjusted to satisfy step-size constraints

Step size: 0.0102556  
Cos(theta): 0.7294628

Final level shift: -6.7314654E-02

energy change: 5.8459E-06 \* ( 5.0000E-05 )  
gradient maximum: 8.6738E-04 . ( 4.5000E-04 )  
gradient rms: 1.6989E-04 \* ( 3.0000E-04 )  
step size: 0.01026 trust radius: 0.01000  
displacement maximum: 5.9319E-03 . ( 1.8000E-03 )  
displacement rms: 9.2850E-04 \* ( 1.2000E-03 )  
predicted energy change: -1.0559E-05 geom step: 1.0256E-  
02 full step: 1.0256E-02  
molecular structure not yet converged...

center of mass moved by:

x: 1.8354E-05 y: 4.5806E-04 z: -4.7718E-05

new geometry:

|      |               |              |               | angstroms |  |  |
|------|---------------|--------------|---------------|-----------|--|--|
| atom | x             | y            | z             |           |  |  |
| H1   | -1.1803789856 | 1.8878813188 | -2.2328130744 |           |  |  |
| C1   | -1.0988953563 | 2.1207667248 | -1.1846510925 |           |  |  |
| C2   | -0.8863376449 | 2.6958716269 | 1.5030904307  |           |  |  |



|     |               |               |               |
|-----|---------------|---------------|---------------|
| C3  | -0.8785181702 | 1.0873240508  | -0.2893159703 |
| C4  | -1.2060847899 | 3.4350715788  | -0.7610808821 |
| C5  | -1.1003626469 | 3.7145878349  | 0.5890762365  |
| C6  | -0.7677723124 | 1.3783033444  | 1.0721218450  |
| C7  | -0.7861001903 | -0.3520482930 | -0.7565964104 |
| H3  | -1.3726224823 | 4.2233616793  | -1.4730896066 |
| H4  | -1.1886375146 | 4.7269680088  | 0.9422163490  |
| H6  | -0.8190681086 | 2.9340967799  | 2.5468246515  |
| C16 | 0.6136625402  | -0.7638626080 | -1.2106434266 |
| C8  | -1.3971823449 | -1.2498508510 | 0.3422700235  |
| N2  | -0.5089216278 | 0.3386960755  | 1.9930232048  |
| C9  | -0.7815144796 | -0.9759982062 | 1.7045737438  |
| C10 | 0.0112054067  | 0.6561035644  | 3.3151834148  |
| O1  | -0.5803977148 | -1.8493565871 | 2.5003687402  |
| C23 | -1.3859019739 | -2.7416267020 | 0.0237726206  |
| C18 | 3.1407636183  | -1.5870041079 | -2.0927579555 |
| C19 | 0.7617055082  | -1.4795471289 | -2.3942352335 |
| C20 | 1.7593689783  | -0.4574358918 | -0.4801472402 |
| C21 | 3.0085219220  | -0.8681273289 | -0.9144859062 |
| C22 | 2.0112655331  | -1.8892256303 | -2.8340372692 |
| H2  | -0.1084495029 | -1.7222742708 | -2.9809180966 |
| H5  | 1.6830571597  | 0.1089628864  | 0.4287736924  |
| H7  | 3.8796316209  | -0.6227743528 | -0.3325943642 |
| H8  | 2.0987253483  | -2.4414784436 | -3.7537667891 |
| H9  | 4.1124006906  | -1.9030722729 | -2.4295734589 |
| H10 | -1.4325456513 | -0.4533215443 | -1.6220775828 |
| H19 | -0.3759638203 | -3.1282991979 | -0.0212948649 |
| H20 | -1.8650523143 | -2.9199234243 | -0.9343944902 |
| H21 | -1.9198145436 | -3.2933430830 | 0.7856826164  |
| H22 | -2.4344424009 | -0.9266416255 | 0.4399092185  |
| H11 | 0.8094645910  | 1.3832565660  | 3.2286008575  |
| H12 | 0.3932737828  | -0.2492102220 | 3.7535144108  |
| H13 | -0.7630806805 | 1.0569937541  | 3.9619830161  |

nuclear repulsion energy..... 1414.892408523 hartrees

-----  
 / end of geometry optimization iteration 50 /  
 -----

end of program geopt

start of program onee  
 smallest eigenvalue of S: 3.334E-04  
 number of canonical orbitals..... 368  
 end of program onee

start of program probe  
 end of program probe

start of program grid

number of gridpoints:

| atom     | H1  | C1  | C2  | C3  | C4  | C5  | C6  |
|----------|-----|-----|-----|-----|-----|-----|-----|
| C7       |     |     |     |     |     |     |     |
| grid # 1 | 72  | 87  | 89  | 90  | 89  | 88  | 84  |
| 81       |     |     |     |     |     |     |     |
| grid # 2 | 116 | 97  | 96  | 98  | 97  | 97  | 94  |
| 90       |     |     |     |     |     |     |     |
| grid # 3 | 217 | 182 | 184 | 194 | 183 | 184 | 189 |
| 177      |     |     |     |     |     |     |     |
| grid # 4 | 216 | 326 | 328 | 338 | 328 | 328 | 323 |
| 314      |     |     |     |     |     |     |     |

number of gridpoints:

| atom     | H3  | H4  | H6  | C16 | C8  | N2  | C9  |
|----------|-----|-----|-----|-----|-----|-----|-----|
| C10      |     |     |     |     |     |     |     |
| grid # 1 | 73  | 73  | 70  | 92  | 82  | 95  | 82  |
| 69       |     |     |     |     |     |     |     |
| grid # 2 | 118 | 118 | 112 | 100 | 90  | 105 | 92  |
| 78       |     |     |     |     |     |     |     |
| grid # 3 | 223 | 223 | 207 | 194 | 174 | 211 | 176 |
| 146      |     |     |     |     |     |     |     |
| grid # 4 | 224 | 223 | 208 | 342 | 311 | 387 | 293 |
| 276      |     |     |     |     |     |     |     |

number of gridpoints:

| atom     | O1  | C23 | C18 | C19 | C20 | C21 | C22 |
|----------|-----|-----|-----|-----|-----|-----|-----|
| H2       |     |     |     |     |     |     |     |
| grid # 1 | 111 | 74  | 89  | 88  | 88  | 89  | 89  |
| 71       |     |     |     |     |     |     |     |
| grid # 2 | 123 | 80  | 97  | 95  | 96  | 97  | 96  |
| 112      |     |     |     |     |     |     |     |
| grid # 3 | 257 | 150 | 183 | 183 | 182 | 184 | 183 |
| 212      |     |     |     |     |     |     |     |
| grid # 4 | 450 | 285 | 327 | 326 | 327 | 327 | 327 |
| 211      |     |     |     |     |     |     |     |

number of gridpoints:

| atom     | H5  | H7  | H8  | H9  | H10 | H19 | H20 |
|----------|-----|-----|-----|-----|-----|-----|-----|
| H21      |     |     |     |     |     |     |     |
| grid # 1 | 71  | 73  | 73  | 73  | 66  | 71  | 71  |
| 70       |     |     |     |     |     |     |     |
| grid # 2 | 111 | 118 | 118 | 118 | 106 | 108 | 110 |
| 108      |     |     |     |     |     |     |     |
| grid # 3 | 212 | 223 | 223 | 224 | 202 | 218 | 216 |
| 217      |     |     |     |     |     |     |     |
| grid # 4 | 207 | 223 | 224 | 224 | 196 | 212 | 216 |
| 215      |     |     |     |     |     |     |     |

number of gridpoints:

| atom | H22 | H11 | H12 | H13 | total |
|------|-----|-----|-----|-----|-------|
|------|-----|-----|-----|-----|-------|

```

grid # 1      69      71      70      71      2864
grid # 2     110     109     108     111     3729
grid # 3     214     213     212     217     7189
grid # 4     211     211     209     218     9911

```

end of program grid

```

start of program rwr
end of program rwr

```

start of program scf

|      | i | u | d | i | g |                  | energy   | RMS     | maximum |
|------|---|---|---|---|---|------------------|----------|---------|---------|
|      | t | p | i | c | r |                  | change   | density | DIIS    |
|      | e | d | i | u | i | total energy     |          | change  | error   |
|      | r | t | s | t | d |                  |          |         |         |
| etot | 1 | N | N | 1 | U | -783.03313436264 |          | 2.6E-05 | 1.3E-03 |
| etot | 2 | Y | Y | 4 | M | -783.03323971206 | 1.1E-04  | 1.2E-05 | 5.3E-04 |
| etot | 3 | Y | Y | 4 | M | -783.03325671957 | 1.7E-05  | 3.7E-06 | 1.3E-04 |
| etot | 4 | Y | N | 4 | M | -783.03325513693 | -1.6E-06 | 0.0E+00 | 0.0E+00 |

Energy components, in hartrees:

```

(A) Nuclear repulsion..... 1414.89240852303
(E) Total one-electron terms..... -3874.35858082590
(I) Total two-electron terms..... 1676.43291716594
(L) Electronic energy..... -2197.92566365996 (E+I)
(N) Total energy..... -783.03325513693 (A+L)

```

```

SCFE: SCF energy: HF      -783.03325513693 hartrees  iterations:
4

```

```

HOMO energy:      -0.30204
LUMO energy:       0.12928

```

Orbital energies:

```

-20.52691  -15.60008  -11.34577  -11.28574  -11.25661  -11.24981
-11.24296  -11.24134  -11.24052  -11.23872  -11.23791  -11.23494
-11.23148  -11.23062  -11.23018  -11.22982  -11.22870  -11.22760
-11.20917  -1.39748   -1.26943   -1.16498   -1.14892   -1.10594
-1.03000   -1.01861   -1.01779   -1.01270   -0.96254   -0.93266
-0.85808   -0.83891   -0.83326   -0.82165   -0.79604   -0.74108
-0.71093   -0.69497   -0.67280   -0.66427   -0.64458   -0.63751
-0.62742   -0.61487   -0.61223   -0.60846   -0.59690   -0.58336
-0.57624   -0.55339   -0.54873   -0.54063   -0.53097   -0.51905
-0.51487   -0.50717   -0.50097   -0.49774   -0.48457   -0.46861
-0.46284   -0.42148   -0.41148   -0.34253   -0.33296   -0.32284
-0.30204   0.12928    0.13401    0.14451    0.15235    0.20401

```

0.22968 0.24104 0.24886 0.26136 0.28826

end of program scf

start of program derla  
end of program derla

start of program rwr  
end of program rwr

start of program derlb

forces (hartrees/bohr) : total

| atom | label | x             | y             | z             |
|------|-------|---------------|---------------|---------------|
| 1    | H1    | -1.373949E-05 | 1.423061E-05  | 3.687033E-05  |
| 2    | C1    | -2.973161E-05 | 1.041770E-04  | -7.971008E-05 |
| 3    | C2    | -4.181288E-05 | 1.428732E-04  | 1.371293E-05  |
| 4    | C3    | -4.907179E-05 | 1.357117E-05  | -2.083892E-04 |
| 5    | C4    | -1.821463E-05 | 6.685944E-05  | 4.060026E-05  |
| 6    | C5    | -2.199767E-05 | 3.997837E-05  | -1.075045E-05 |
| 7    | C6    | 3.034795E-05  | 3.559440E-05  | 1.627754E-04  |
| 8    | C7    | -9.152840E-05 | -5.591400E-05 | -5.531574E-05 |
| 9    | H3    | 6.945647E-06  | -4.233990E-05 | 5.958413E-05  |
| 10   | H4    | -2.806387E-06 | -4.404424E-05 | -1.146433E-05 |
| 11   | H6    | -3.174655E-05 | 2.933259E-05  | -6.291090E-05 |
| 12   | C16   | -2.243026E-05 | -2.386016E-04 | -7.752165E-05 |
| 13   | C8    | 1.235800E-04  | 1.062364E-04  | 2.216126E-05  |
| 14   | N2    | -4.252769E-05 | 4.913415E-04  | -2.441794E-04 |
| 15   | C9    | -5.907516E-05 | 1.873556E-05  | 8.832746E-05  |
| 16   | C10   | 7.121930E-06  | 2.225125E-04  | -6.515139E-05 |
| 17   | O1    | -4.149598E-06 | -3.484824E-04 | 1.488941E-04  |
| 18   | C23   | 6.170585E-07  | 3.788789E-06  | -6.965790E-06 |
| 19   | C18   | -1.489051E-04 | 5.292928E-05  | -3.851714E-05 |
| 20   | C19   | -1.411750E-04 | 1.101775E-04  | 3.730492E-05  |
| 21   | C20   | -1.038763E-04 | -2.739169E-04 | -3.928527E-04 |
| 22   | C21   | -1.342634E-04 | -6.719152E-05 | -2.761956E-04 |
| 23   | C22   | 1.189859E-04  | 3.630842E-06  | 2.672416E-05  |
| 24   | H2    | 1.795638E-04  | 1.196113E-04  | 1.960139E-04  |
| 25   | H5    | -3.584733E-05 | 3.132857E-04  | 2.048779E-04  |
| 26   | H7    | 5.872837E-05  | 8.128869E-05  | 8.895288E-06  |
| 27   | H8    | -1.098928E-05 | 1.012705E-04  | 2.095134E-04  |
| 28   | H9    | -2.611776E-05 | 6.477763E-05  | 1.852448E-05  |
| 29   | H10   | 3.283739E-05  | 6.442765E-05  | 1.327011E-05  |
| 30   | H19   | -3.887030E-05 | 5.678065E-05  | -9.916411E-06 |
| 31   | H20   | -3.024425E-05 | 3.151904E-05  | 1.158094E-05  |
| 32   | H21   | 5.200948E-06  | 4.941005E-05  | -5.337839E-05 |
| 33   | H22   | -6.166823E-05 | 6.321277E-05  | -3.389977E-06 |

|       |       |               |               |               |
|-------|-------|---------------|---------------|---------------|
| 34    | H11   | -1.536443E-04 | -7.001633E-05 | -3.172737E-05 |
| 35    | H12   | -9.645787E-06 | -1.447501E-04 | 5.151764E-05  |
| 36    | H13   | 1.930169E-05  | -1.523432E-05 | -1.481150E-05 |
| ----- |       |               |               |               |
|       | total | -7.408485E-04 | 1.101062E-03  | -2.919993E-04 |

end of program derlb

start of program geopt 51

geometry optimization step 51

reading input hessian of dimension 108

in five columns format

reading input hessian of dimension 108

in five columns format

Level shifts adjusted to satisfy step-size constraints

Step size: 0.0108753

Cos(theta): 0.7176881

Final level shift: -6.1241555E-02

energy change: -5.4772E-06 \* ( 5.0000E-05 )

gradient maximum: 8.5445E-04 . ( 4.5000E-04 )

gradient rms: 1.6657E-04 \* ( 3.0000E-04 )

step size: 0.01088 trust radius: 0.01000

displacement maximum: 5.9416E-03 . ( 1.8000E-03 )

displacement rms: 9.8461E-04 \* ( 1.2000E-03 )

predicted energy change: -1.0802E-05 geom step: 1.0875E-

02 full step: 1.0875E-02

molecular structure not yet converged...

center of mass moved by:

x: -2.3402E-04 y: -4.7577E-04 z: 1.8383E-04

new geometry:

|      | angstroms     |               |               |
|------|---------------|---------------|---------------|
| atom | x             | y             | z             |
| H1   | -1.1777099107 | 1.8890016167  | -2.2327163809 |
| C1   | -1.0964684535 | 2.1213772258  | -1.1844955086 |
| C2   | -0.8846602999 | 2.6952777998  | 1.5038850430  |
| C3   | -0.8778158937 | 1.0872713023  | -0.2895851475 |
| C4   | -1.2022245665 | 3.4355684428  | -0.7600743067 |
| C5   | -1.0969302741 | 3.7144647773  | 0.5902076144  |
| C6   | -0.7673485674 | 1.3777817344  | 1.0723328211  |
| C7   | -0.7862563358 | -0.3523416086 | -0.7568110028 |
| H3   | -1.3672015948 | 4.2243142613  | -1.4716317779 |
| H4   | -1.1840463914 | 4.7266540862  | 0.9438188574  |
| H6   | -0.8177509662 | 2.9330985547  | 2.5476270094  |
| C16  | 0.6135771135  | -0.7649867223 | -1.2100674828 |

|     |               |               |               |
|-----|---------------|---------------|---------------|
| C8  | -1.3983917335 | -1.2495246395 | 0.3418372055  |
| N2  | -0.5100390949 | 0.3378712618  | 1.9928933826  |
| C9  | -0.7836880528 | -0.9771835256 | 1.7047656910  |
| C10 | 0.0097724056  | 0.6531907553  | 3.3155893659  |
| O1  | -0.5849373632 | -1.8519954756 | 2.5005149750  |
| C23 | -1.3884969161 | -2.7412494098 | 0.0226318121  |
| C18 | 3.1415257953  | -1.5837632955 | -2.0936613789 |
| C19 | 0.7620309811  | -1.4865147137 | -2.3890905117 |
| C20 | 1.7594228772  | -0.4496409767 | -0.4853622505 |
| C21 | 3.0089432635  | -0.8578821568 | -0.9204463275 |
| C22 | 2.0119341033  | -1.8948009600 | -2.8292435145 |
| H2  | -0.1079405649 | -1.7344853504 | -2.9718413402 |
| H5  | 1.6832532285  | 0.1251319827  | 0.4185460153  |
| H7  | 3.8803701918  | -0.6046380716 | -0.3430834276 |
| H8  | 2.0994951135  | -2.4525134277 | -3.7448653032 |
| H9  | 4.1136344684  | -1.8977424511 | -2.4308111241 |
| H10 | -1.4319450544 | -0.4528418178 | -1.6227921390 |
| H19 | -0.3788900907 | -3.1284514624 | -0.0235073180 |
| H20 | -1.8687854997 | -2.9188715379 | -0.9350810627 |
| H21 | -1.9220271978 | -3.2929169891 | 0.7846984354  |
| H22 | -2.4355103224 | -0.9253117104 | 0.4389757902  |
| H11 | 0.8085749177  | 1.3790488490  | 3.2294289291  |
| H12 | 0.3901890531  | -0.2537828334 | 3.7531069356  |
| H13 | -0.7641986915 | 1.0542742079  | 3.9633166521  |

nuclear repulsion energy..... 1414.932022180 hartrees

-----  
 / end of geometry optimization iteration 51 /  
 -----

end of program geopt

start of program onee  
 smallest eigenvalue of S: 3.334E-04  
 number of canonical orbitals..... 368  
 end of program onee

start of program probe  
 end of program probe

start of program grid

number of gridpoints:

| atom     | H1  | C1 | C2 | C3 | C4 | C5 | C6 |
|----------|-----|----|----|----|----|----|----|
| C7       |     |    |    |    |    |    |    |
| grid # 1 | 72  | 87 | 89 | 89 | 89 | 88 | 83 |
| 81       |     |    |    |    |    |    |    |
| grid # 2 | 116 | 97 | 96 | 98 | 97 | 97 | 95 |
| 90       |     |    |    |    |    |    |    |

|          |     |     |     |     |     |     |     |
|----------|-----|-----|-----|-----|-----|-----|-----|
| grid # 3 | 217 | 182 | 184 | 194 | 183 | 184 | 189 |
| 177      |     |     |     |     |     |     |     |
| grid # 4 | 216 | 326 | 328 | 338 | 328 | 328 | 326 |
| 314      |     |     |     |     |     |     |     |

number of gridpoints:

|          |     |     |     |     |     |     |     |
|----------|-----|-----|-----|-----|-----|-----|-----|
| atom     | H3  | H4  | H6  | C16 | C8  | N2  | C9  |
| C10      |     |     |     |     |     |     |     |
| grid # 1 | 73  | 73  | 70  | 92  | 82  | 95  | 82  |
| 70       |     |     |     |     |     |     |     |
| grid # 2 | 118 | 118 | 112 | 100 | 90  | 105 | 92  |
| 79       |     |     |     |     |     |     |     |
| grid # 3 | 223 | 223 | 207 | 194 | 174 | 211 | 176 |
| 143      |     |     |     |     |     |     |     |
| grid # 4 | 224 | 223 | 208 | 342 | 311 | 387 | 294 |
| 273      |     |     |     |     |     |     |     |

number of gridpoints:

|          |     |     |     |     |     |     |     |
|----------|-----|-----|-----|-----|-----|-----|-----|
| atom     | O1  | C23 | C18 | C19 | C20 | C21 | C22 |
| H2       |     |     |     |     |     |     |     |
| grid # 1 | 111 | 74  | 89  | 88  | 88  | 89  | 89  |
| 71       |     |     |     |     |     |     |     |
| grid # 2 | 123 | 79  | 97  | 95  | 96  | 97  | 96  |
| 112      |     |     |     |     |     |     |     |
| grid # 3 | 257 | 149 | 183 | 183 | 182 | 184 | 183 |
| 212      |     |     |     |     |     |     |     |
| grid # 4 | 450 | 285 | 327 | 326 | 327 | 327 | 327 |
| 211      |     |     |     |     |     |     |     |

number of gridpoints:

|          |     |     |     |     |     |     |     |
|----------|-----|-----|-----|-----|-----|-----|-----|
| atom     | H5  | H7  | H8  | H9  | H10 | H19 | H20 |
| H21      |     |     |     |     |     |     |     |
| grid # 1 | 71  | 73  | 73  | 73  | 66  | 71  | 71  |
| 70       |     |     |     |     |     |     |     |
| grid # 2 | 111 | 118 | 118 | 118 | 106 | 108 | 110 |
| 108      |     |     |     |     |     |     |     |
| grid # 3 | 212 | 222 | 223 | 224 | 203 | 218 | 217 |
| 217      |     |     |     |     |     |     |     |
| grid # 4 | 207 | 223 | 224 | 224 | 196 | 212 | 216 |
| 215      |     |     |     |     |     |     |     |

number of gridpoints:

|          |     |     |     |     |       |
|----------|-----|-----|-----|-----|-------|
| atom     | H22 | H11 | H12 | H13 | total |
| grid # 1 | 69  | 71  | 70  | 71  | 2863  |
| grid # 2 | 110 | 109 | 107 | 111 | 3729  |
| grid # 3 | 214 | 213 | 212 | 217 | 7186  |
| grid # 4 | 211 | 211 | 209 | 218 | 9912  |

end of program grid

start of program rwr

end of program rwr

start of program scf

|      | i | u | d | i | g |                  | RMS     | maximum |
|------|---|---|---|---|---|------------------|---------|---------|
|      | t | p | i | c | r |                  | energy  | DIIS    |
|      | e | d | i | u | i | total energy     | density | error   |
|      | r | t | s | t | d | change           | change  |         |
| etot | 1 | N | N | 1 | U | -783.03312583751 | 2.5E-05 | 1.4E-03 |
| etot | 2 | Y | Y | 4 | M | -783.03323145682 | 1.1E-04 | 5.5E-04 |
| etot | 3 | Y | Y | 4 | M | -783.03324538246 | 1.4E-05 | 1.4E-04 |
| etot | 4 | Y | N | 4 | M | -783.03324892889 | 3.5E-06 | 0.0E+00 |

Energy components, in hartrees:

|     |                               |                   |       |
|-----|-------------------------------|-------------------|-------|
| (A) | Nuclear repulsion.....        | 1414.93202217953  |       |
| (E) | Total one-electron terms..... | -3874.42734148806 |       |
| (I) | Total two-electron terms..... | 1676.46207037964  |       |
| (L) | Electronic energy.....        | -2197.96527110842 | (E+I) |
| (N) | Total energy.....             | -783.03324892889  | (A+L) |

SCFE: SCF energy: HF -783.03324892889 hartrees iterations:  
4

HOMO energy: -0.30214  
LUMO energy: 0.12931

Orbital energies:

|           |           |           |           |           |           |
|-----------|-----------|-----------|-----------|-----------|-----------|
| -20.52665 | -15.60062 | -11.34624 | -11.28621 | -11.25666 | -11.25009 |
| -11.24317 | -11.24177 | -11.24041 | -11.23856 | -11.23795 | -11.23495 |
| -11.23109 | -11.23042 | -11.23001 | -11.22943 | -11.22838 | -11.22764 |
| -11.20909 | -1.39709  | -1.26970  | -1.16526  | -1.14910  | -1.10612  |
| -1.03016  | -1.01875  | -1.01803  | -1.01277  | -0.96257  | -0.93282  |
| -0.85823  | -0.83901  | -0.83345  | -0.82184  | -0.79615  | -0.74123  |
| -0.71106  | -0.69509  | -0.67286  | -0.66438  | -0.64468  | -0.63760  |
| -0.62746  | -0.61499  | -0.61222  | -0.60861  | -0.59693  | -0.58333  |
| -0.57646  | -0.55352  | -0.54887  | -0.54065  | -0.53092  | -0.51902  |
| -0.51485  | -0.50724  | -0.50118  | -0.49780  | -0.48462  | -0.46871  |
| -0.46292  | -0.42161  | -0.41156  | -0.34271  | -0.33288  | -0.32308  |
| -0.30214  | 0.12931   | 0.13404   | 0.14444   | 0.15228   | 0.20377   |
| 0.22972   | 0.24096   | 0.24890   | 0.26131   | 0.28801   |           |

end of program scf

start of program derla  
end of program derla



start of program rwr  
end of program rwr

start of program der1b

forces (hartrees/bohr) : total

| atom  | label | x             | y             | z             |
|-------|-------|---------------|---------------|---------------|
| 1     | H1    | -2.482882E-05 | 5.177573E-05  | -5.145735E-05 |
| 2     | C1    | -1.238259E-05 | -4.214934E-05 | 5.559596E-05  |
| 3     | C2    | -9.689020E-06 | -9.496388E-05 | -2.001956E-05 |
| 4     | C3    | 2.304038E-05  | 2.697201E-05  | 2.233112E-04  |
| 5     | C4    | -1.982807E-05 | 1.466823E-05  | -3.183802E-05 |
| 6     | C5    | -2.217270E-05 | 3.377168E-05  | -3.362130E-05 |
| 7     | C6    | -5.100440E-05 | 1.907202E-05  | -2.233461E-04 |
| 8     | C7    | 2.921073E-05  | 1.427224E-04  | 3.247637E-05  |
| 9     | H3    | -5.127241E-05 | 1.176837E-04  | -8.651485E-05 |
| 10    | H4    | -3.711070E-05 | 1.098145E-04  | -5.943565E-06 |
| 11    | H6    | -1.424875E-05 | 2.989317E-05  | 4.899068E-05  |
| 12    | C16   | -3.463249E-04 | 2.440185E-04  | -1.123552E-05 |
| 13    | C8    | -8.198590E-05 | -8.087593E-05 | -9.865244E-06 |
| 14    | N2    | -6.021358E-05 | -6.480846E-04 | 1.901373E-04  |
| 15    | C9    | -1.232772E-06 | -2.109386E-04 | 2.674299E-04  |
| 16    | C10   | -2.332519E-04 | -7.353139E-05 | 2.146582E-04  |
| 17    | O1    | -6.430481E-05 | 8.711837E-04  | -5.324956E-04 |
| 18    | C23   | -4.455068E-05 | 2.291256E-05  | -1.686378E-05 |
| 19    | C18   | 4.388860E-04  | 4.287834E-05  | 1.411677E-04  |
| 20    | C19   | 1.313401E-04  | -1.348216E-04 | -2.077970E-04 |
| 21    | C20   | 3.591144E-04  | 2.500811E-04  | 2.980160E-04  |
| 22    | C21   | -7.149625E-05 | 1.697480E-04  | 2.927424E-04  |
| 23    | C22   | -5.413833E-04 | -4.253767E-05 | -2.638282E-04 |
| 24    | H2    | -4.289608E-04 | -1.293857E-04 | -3.827461E-04 |
| 25    | H5    | 5.189263E-05  | -9.527311E-06 | 1.758891E-04  |
| 26    | H7    | 2.538659E-04  | 9.321166E-05  | 2.431716E-04  |
| 27    | H8    | -8.070462E-05 | -9.926270E-05 | -3.410422E-04 |
| 28    | H9    | 4.972378E-05  | -4.799946E-06 | -1.659044E-05 |
| 29    | H10   | -7.687256E-05 | -5.829530E-06 | -3.842431E-05 |
| 30    | H19   | -1.694919E-05 | 8.143738E-06  | -7.518820E-06 |
| 31    | H20   | -1.732300E-05 | 2.207636E-05  | -2.550613E-05 |
| 32    | H21   | -4.303535E-05 | 1.502382E-05  | 1.896723E-05  |
| 33    | H22   | 1.214811E-09  | 7.523111E-06  | -5.420146E-06 |
| 34    | H11   | 1.450811E-04  | 1.712002E-04  | 9.163344E-05  |
| 35    | H12   | -3.608523E-05 | 1.924162E-04  | -5.779034E-05 |
| 36    | H13   | 1.593889E-04  | -5.739795E-05 | -2.122706E-04 |
| total |       | -7.456673E-04 | 1.022685E-03  | -2.879480E-04 |

end of program der1b

start of program geopt 52

geometry optimization step 52

reading input hessian of dimension 108  
in five columns format  
reading input hessian of dimension 108  
in five columns format  
reading input hessian of dimension 108  
in five columns format

energy change: 6.2080E-06 \* ( 5.0000E-05 )  
gradient maximum: 9.6977E-04 . ( 4.5000E-04 )  
gradient rms: 2.4043E-04 \* ( 3.0000E-04 )  
step size: 0.00855 trust radius: 0.01000  
displacement maximum: 4.3748E-03 . ( 1.8000E-03 )  
displacement rms: 7.7378E-04 \* ( 1.2000E-03 )  
predicted energy change: -6.5858E-06 geom step: 8.5467E-03  
03 full step: 8.5467E-03  
molecular structure not yet converged...

center of mass moved by:

x: 3.5033E-04 y: 1.9991E-04 z: -2.2779E-04

new geometry:

|      | angstroms     |               |               |
|------|---------------|---------------|---------------|
| atom | x             | y             | z             |
| H1   | -1.1777087954 | 1.8883176899  | -2.2327536475 |
| C1   | -1.0969879317 | 2.1210581497  | -1.1846428311 |
| C2   | -0.8864913786 | 2.6957594783  | 1.5033300926  |
| C3   | -0.8782195280 | 1.0872497486  | -0.2894271431 |
| C4   | -1.2034717513 | 3.4353611301  | -0.7608782176 |
| C5   | -1.0989008554 | 3.7146221518  | 0.5892922601  |
| C6   | -0.7681777554 | 1.3781393300  | 1.0722690963  |
| C7   | -0.7863716556 | -0.3524022280 | -0.7564508923 |
| H3   | -1.3685691561 | 4.2237234090  | -1.4727833082 |
| H4   | -1.1866829506 | 4.7268525106  | 0.9425447145  |
| H6   | -0.8203257149 | 2.9339978361  | 2.5469364891  |
| C16  | 0.6132987131  | -0.7648804579 | -1.2103499597 |
| C8   | -1.3974910449 | -1.2497579526 | 0.3427106021  |
| N2   | -0.5100554865 | 0.3384594660  | 1.9930169453  |
| C9   | -0.7818058224 | -0.9763529334 | 1.7050162582  |
| C10  | 0.0096188319  | 0.6545958428  | 3.3156766230  |
| O1   | -0.5800017569 | -1.8501949242 | 2.4999361338  |
| C23  | -1.3873699669 | -2.7416276201 | 0.0240838481  |
| C18  | 3.1408397785  | -1.5854500474 | -2.0934858619 |
| C19  | 0.7614585694  | -1.4823328532 | -2.3924661498 |
| C20  | 1.7592098570  | -0.4546196661 | -0.4823501933 |
| C21  | 3.0085285298  | -0.8638391489 | -0.9171822057 |
| C22  | 2.0111607669  | -1.8912800368 | -2.8324879514 |
| H2   | -0.1086018122 | -1.7265071949 | -2.9777886144 |
| H5   | 1.6833753189  | 0.1162819014  | 0.4245195416  |

S534

|     |               |               |               |
|-----|---------------|---------------|---------------|
| H7  | 3.8799715800  | -0.6147882705 | -0.3371685245 |
| H8  | 2.0985687358  | -2.4455101569 | -3.7505765597 |
| H9  | 4.1127372135  | -1.9002569823 | -2.4304255632 |
| H10 | -1.4325773920 | -0.4533962373 | -1.6218538014 |
| H19 | -0.3777644398 | -3.1287720167 | -0.0217863259 |
| H20 | -1.8676100118 | -2.9195334162 | -0.9335630554 |
| H21 | -1.9209878754 | -3.2930536100 | 0.7862172232  |
| H22 | -2.4345911738 | -0.9259246358 | 0.4405277111  |
| H11 | 0.8070135769  | 1.3824140387  | 3.2297980135  |
| H12 | 0.3925704884  | -0.2511004631 | 3.7530524316  |
| H13 | -0.7648018972 | 1.0538274532  | 3.9628416471  |

nuclear repulsion energy..... 1414.934410704 hartrees

-----  
/ end of geometry optimization iteration 52 /  
-----

end of program geopt

start of program onee  
smallest eigenvalue of S: 3.334E-04  
number of canonical orbitals..... 368  
end of program onee

start of program probe  
end of program probe

start of program grid

number of gridpoints:

|          | atom | H1  | C1  | C2  | C3  | C4  | C5  | C6  |
|----------|------|-----|-----|-----|-----|-----|-----|-----|
| C7       |      |     |     |     |     |     |     |     |
| grid # 1 |      | 72  | 87  | 89  | 89  | 89  | 88  | 84  |
| 81       |      |     |     |     |     |     |     |     |
| grid # 2 |      | 116 | 97  | 96  | 98  | 97  | 97  | 94  |
| 90       |      |     |     |     |     |     |     |     |
| grid # 3 |      | 217 | 182 | 184 | 194 | 183 | 184 | 189 |
| 177      |      |     |     |     |     |     |     |     |
| grid # 4 |      | 216 | 326 | 328 | 338 | 328 | 328 | 323 |
| 314      |      |     |     |     |     |     |     |     |

number of gridpoints:

|          | atom | H3  | H4  | H6  | C16 | C8 | N2  | C9 |
|----------|------|-----|-----|-----|-----|----|-----|----|
| C10      |      |     |     |     |     |    |     |    |
| grid # 1 |      | 73  | 73  | 70  | 92  | 82 | 95  | 82 |
| 69       |      |     |     |     |     |    |     |    |
| grid # 2 |      | 118 | 118 | 112 | 100 | 90 | 105 | 92 |
| 79       |      |     |     |     |     |    |     |    |

|          |     |     |     |     |     |     |     |
|----------|-----|-----|-----|-----|-----|-----|-----|
| grid # 3 | 223 | 223 | 207 | 194 | 174 | 211 | 176 |
| 145      |     |     |     |     |     |     |     |
| grid # 4 | 224 | 223 | 208 | 342 | 311 | 387 | 293 |
| 275      |     |     |     |     |     |     |     |

number of gridpoints:

|          |     |     |     |     |     |     |     |
|----------|-----|-----|-----|-----|-----|-----|-----|
| atom     | O1  | C23 | C18 | C19 | C20 | C21 | C22 |
| H2       |     |     |     |     |     |     |     |
| grid # 1 | 111 | 74  | 89  | 88  | 88  | 89  | 89  |
| 71       |     |     |     |     |     |     |     |
| grid # 2 | 123 | 80  | 97  | 95  | 96  | 97  | 96  |
| 112      |     |     |     |     |     |     |     |
| grid # 3 | 257 | 150 | 183 | 183 | 182 | 184 | 183 |
| 212      |     |     |     |     |     |     |     |
| grid # 4 | 450 | 285 | 327 | 326 | 327 | 327 | 327 |
| 211      |     |     |     |     |     |     |     |

number of gridpoints:

|          |     |     |     |     |     |     |     |
|----------|-----|-----|-----|-----|-----|-----|-----|
| atom     | H5  | H7  | H8  | H9  | H10 | H19 | H20 |
| H21      |     |     |     |     |     |     |     |
| grid # 1 | 71  | 73  | 73  | 73  | 66  | 71  | 71  |
| 70       |     |     |     |     |     |     |     |
| grid # 2 | 111 | 118 | 118 | 118 | 106 | 108 | 110 |
| 108      |     |     |     |     |     |     |     |
| grid # 3 | 212 | 223 | 223 | 224 | 203 | 218 | 217 |
| 217      |     |     |     |     |     |     |     |
| grid # 4 | 207 | 223 | 224 | 224 | 196 | 212 | 216 |
| 215      |     |     |     |     |     |     |     |

number of gridpoints:

|          |     |     |     |     |       |
|----------|-----|-----|-----|-----|-------|
| atom     | H22 | H11 | H12 | H13 | total |
| grid # 1 | 69  | 71  | 70  | 71  | 2863  |
| grid # 2 | 110 | 109 | 108 | 111 | 3730  |
| grid # 3 | 214 | 213 | 212 | 217 | 7190  |
| grid # 4 | 211 | 211 | 209 | 218 | 9910  |

end of program grid

start of program rwr  
end of program rwr

start of program scf

|      |   |   |   |   |              |                  |         |         |
|------|---|---|---|---|--------------|------------------|---------|---------|
| i    | u | d | i | g |              |                  |         |         |
| t    | p | i | c | r |              | RMS              | maximum |         |
| e    | d | i | u | i | energy       | density          | DIIS    |         |
| r    | t | s | t | d | total energy | change           | error   |         |
| etot | 1 | N | N | 1 | U            | -783.03321818875 | 1.7E-05 | 7.8E-04 |
| etot | 2 | Y | Y | 4 | M            | -783.03326062027 | 4.2E-05 | 7.5E-06 |
|      |   |   |   |   |              |                  |         | 3.1E-04 |

```

etot   3   Y   Y   4   M  -783.03326964784   9.0E-06   2.4E-06   8.2E-05
etot   4   Y   N   4   M  -783.03326787528  -1.8E-06   0.0E+00   0.0E+00

```

Energy components, in hartrees:

```

(A) Nuclear repulsion..... 1414.93441070356
(E) Total one-electron terms..... -3874.43985833599
(I) Total two-electron terms..... 1676.47217975715
(L) Electronic energy..... -2197.96767857884 (E+I)
(N) Total energy..... -783.03326787528 (A+L)

```

SCFE: SCF energy: HF -783.03326787528 hartrees iterations:  
4

```

HOMO energy: -0.30206
LUMO energy: 0.12931

```

Orbital energies:

```

-20.52685  -15.60016  -11.34578  -11.28588  -11.25653  -11.24986
-11.24292  -11.24144  -11.24046  -11.23866  -11.23790  -11.23493
-11.23135  -11.23054  -11.23011  -11.22966  -11.22860  -11.22764
-11.20911  -1.39756   -1.26957   -1.16507   -1.14900   -1.10597
-1.03004   -1.01868   -1.01788   -1.01270   -0.96256   -0.93272
-0.85812   -0.83900   -0.83330   -0.82169   -0.79607   -0.74117
-0.71095   -0.69500   -0.67285   -0.66433   -0.64465   -0.63754
-0.62743   -0.61491   -0.61229   -0.60850   -0.59688   -0.58332
-0.57630   -0.55344   -0.54881   -0.54066   -0.53098   -0.51903
-0.51486   -0.50718   -0.50105   -0.49777   -0.48456   -0.46864
-0.46284   -0.42156   -0.41147   -0.34260   -0.33293   -0.32290
-0.30206   0.12931    0.13404    0.14451    0.15233    0.20411
0.22975    0.24102    0.24896    0.26137    0.28828

```

end of program scf

```

start of program derla
end of program derla

```

```

start of program rwr
end of program rwr

```

start of program der1b

forces (hartrees/bohr) : total

```

atom  label          x          y          z
----  -
1     H1     -3.114892E-05  2.389180E-05  -7.942389E-05
2     C1     -3.396051E-05  3.754440E-05  -2.122494E-05

```

|       |       |               |               |               |
|-------|-------|---------------|---------------|---------------|
| 3     | C2    | -2.237622E-05 | -4.412260E-05 | -5.750733E-05 |
| 4     | C3    | 7.705554E-06  | -1.640225E-05 | 2.837941E-05  |
| 5     | C4    | -1.351911E-05 | -3.598976E-05 | -1.050528E-05 |
| 6     | C5    | -1.992820E-05 | 2.684687E-05  | -4.751564E-06 |
| 7     | C6    | -1.149393E-05 | 5.921485E-05  | -1.252274E-05 |
| 8     | C7    | 7.866075E-05  | 1.992100E-05  | 8.417530E-05  |
| 9     | H3    | -3.417409E-05 | 9.563298E-05  | -6.924522E-05 |
| 10    | H4    | -2.612069E-05 | 7.645631E-05  | 7.945233E-06  |
| 11    | H6    | 6.664339E-06  | 1.899558E-05  | 1.048042E-04  |
| 12    | C16   | -1.116303E-04 | 1.060503E-04  | -2.861163E-05 |
| 13    | C8    | -7.947596E-05 | -2.778852E-05 | -3.192787E-05 |
| 14    | N2    | 5.964864E-05  | 2.154186E-04  | 2.522705E-04  |
| 15    | C9    | -1.255614E-04 | 8.614076E-05  | -6.054017E-04 |
| 16    | C10   | 1.548994E-04  | 1.134796E-04  | -1.179084E-04 |
| 17    | O1    | 7.121653E-06  | -3.387642E-04 | 4.038366E-04  |
| 18    | C23   | -2.782810E-05 | 1.575454E-04  | -3.626072E-05 |
| 19    | C18   | -1.841442E-05 | 3.660601E-05  | 9.173534E-06  |
| 20    | C19   | -1.758706E-06 | 1.343264E-05  | 3.115687E-05  |
| 21    | C20   | 1.488126E-05  | 2.090122E-04  | 1.670951E-04  |
| 22    | C21   | 3.061265E-05  | 3.766480E-05  | -3.906252E-06 |
| 23    | C22   | -3.535025E-05 | 3.169778E-05  | 2.892352E-05  |
| 24    | H2    | -9.140491E-05 | -3.659864E-05 | -3.944124E-05 |
| 25    | H5    | -3.193586E-05 | -6.318463E-05 | -1.131711E-04 |
| 26    | H7    | -5.238995E-06 | 4.689703E-05  | -1.261003E-05 |
| 27    | H8    | -1.625640E-05 | -2.265168E-05 | -7.828164E-05 |
| 28    | H9    | 2.308281E-05  | 5.974614E-06  | -3.881194E-05 |
| 29    | H10   | -9.532511E-05 | 1.522879E-05  | -9.869114E-05 |
| 30    | H19   | 2.619249E-05  | 1.259162E-05  | -2.360470E-05 |
| 31    | H20   | -1.438520E-05 | 2.175129E-05  | -3.940323E-05 |
| 32    | H21   | -3.594034E-05 | 5.405838E-06  | 3.655527E-05  |
| 33    | H22   | -5.189384E-05 | 4.147985E-05  | -1.556094E-05 |
| 34    | H11   | -1.058360E-05 | 4.777469E-05  | 1.159852E-05  |
| 35    | H12   | -6.230350E-05 | 2.121973E-05  | -3.782748E-05 |
| 36    | H13   | -1.414001E-04 | 8.538730E-05  | 1.008267E-04  |
| ----- |       | -----         | -----         | -----         |
|       | total | -7.399392E-04 | 1.083760E-03  | -3.098602E-04 |

end of program derlb

start of program geopt 53

geometry optimization step 53

reading input hessian of dimension 108

in five columns format

reading input hessian of dimension 108

in five columns format

Level shifts adjusted to satisfy step-size constraints

Step size: 0.0142597

Cos(theta): 0.4320013

Final level shift: -8.4737900E-03

energy change: -1.8946E-05 \* ( 5.0000E-05 )  
gradient maximum: 5.4724E-04 . ( 4.5000E-04 )  
gradient rms: 9.1960E-05 \* ( 3.0000E-04 )  
step size: 0.01426 trust radius: 0.01414  
displacement maximum: 5.4362E-03 . ( 1.8000E-03 )  
displacement rms: 1.2910E-03 . ( 1.2000E-03 )  
predicted energy change: -3.9909E-06 geom step: 1.4260E-02  
02 full step: 1.4260E-02  
molecular structure not yet converged...

center of mass moved by:

x: -6.6607E-05 y: 1.5252E-04 z: 8.9503E-05

new geometry:

|      | angstroms     |               |               |
|------|---------------|---------------|---------------|
| atom | x             | y             | z             |
| H1   | -1.1823433758 | 1.8895725139  | -2.2325604710 |
| C1   | -1.0996111300 | 2.1217494272  | -1.1841930638 |
| C2   | -0.8841185643 | 2.6947732879  | 1.5042700518  |
| C3   | -0.8778187320 | 1.0878178452  | -0.2896606405 |
| C4   | -1.2067290597 | 3.4356547888  | -0.7591790898 |
| C5   | -1.0994216843 | 3.7141985698  | 0.5912284777  |
| C6   | -0.7658677868 | 1.3777892005  | 1.0720584509  |
| C7   | -0.7856092226 | -0.3513523222 | -0.7574739731 |
| H3   | -1.3744165704 | 4.2247521103  | -1.4703670787 |
| H4   | -1.1875870767 | 4.7263070622  | 0.9454616848  |
| H6   | -0.8154074216 | 2.9316985000  | 2.5485298304  |
| C16  | 0.6143193631  | -0.7634667555 | -1.2106960751 |
| C8   | -1.3984518843 | -1.2488983903 | 0.3405767170  |
| N2   | -0.5065062264 | 0.3377204733  | 1.9919382335  |
| C9   | -0.7834489078 | -0.9763255849 | 1.7031653465  |
| C10  | 0.0114916218  | 0.6549494331  | 3.3147771050  |
| O1   | -0.5857159785 | -1.8498863750 | 2.5003638764  |
| C23  | -1.3879132193 | -2.7403179538 | 0.0210868375  |
| C18  | 3.1415839344  | -1.5874782971 | -2.0915862461 |
| C19  | 0.7620981600  | -1.4851797946 | -2.3900315066 |
| C20  | 1.7603396540  | -0.4512261465 | -0.4839557576 |
| C21  | 3.0095776302  | -0.8624417602 | -0.9177812545 |
| C22  | 2.0118857694  | -1.8952832994 | -2.8290995858 |
| H2   | -0.1084622864 | -1.7329148310 | -2.9736232943 |
| H5   | 1.6839648901  | 0.1206767168  | 0.4213223507  |
| H7   | 3.8811032514  | -0.6119897058 | -0.3388652748 |
| H8   | 2.0990070956  | -2.4525426768 | -3.7454630940 |
| H9   | 4.1134549466  | -1.9040624626 | -2.4278652728 |
| H10  | -1.4314004101 | -0.4518498346 | -1.6239666563 |
| H19  | -0.3782589120 | -3.1272987803 | -0.0248091216 |
| H20  | -1.8672394378 | -2.9184583587 | -0.9367914773 |
| H21  | -1.9212516765 | -3.2922826175 | 0.7831437284  |
| H22  | -2.4354452974 | -0.9242211372 | 0.4374168624  |

|     |               |               |              |
|-----|---------------|---------------|--------------|
| H11 | 0.8057525327  | 1.3866673184  | 3.2304126811 |
| H12 | 0.3970374473  | -0.2506582098 | 3.7492502888 |
| H13 | -0.7645367465 | 1.0499818635  | 3.9646101221 |

nuclear repulsion energy..... 1414.940729313 hartrees

-----  
 / end of geometry optimization iteration 53 /  
 -----

end of program geopt

start of program onee  
 smallest eigenvalue of S: 3.336E-04  
 number of canonical orbitals..... 368  
 end of program onee

start of program probe  
 end of program probe

start of program grid

number of gridpoints:

|          | atom | H1  | C1  | C2  | C3  | C4  | C5  | C6  |
|----------|------|-----|-----|-----|-----|-----|-----|-----|
| C7       |      |     |     |     |     |     |     |     |
| grid # 1 |      | 72  | 87  | 89  | 90  | 89  | 88  | 83  |
| 81       |      |     |     |     |     |     |     |     |
| grid # 2 |      | 116 | 97  | 96  | 98  | 97  | 97  | 95  |
| 90       |      |     |     |     |     |     |     |     |
| grid # 3 |      | 217 | 182 | 184 | 194 | 183 | 184 | 189 |
| 177      |      |     |     |     |     |     |     |     |
| grid # 4 |      | 216 | 326 | 328 | 338 | 328 | 328 | 324 |
| 314      |      |     |     |     |     |     |     |     |

number of gridpoints:

|          | atom | H3  | H4  | H6  | C16 | C8  | N2  | C9  |
|----------|------|-----|-----|-----|-----|-----|-----|-----|
| C10      |      |     |     |     |     |     |     |     |
| grid # 1 |      | 73  | 73  | 70  | 92  | 82  | 95  | 82  |
| 69       |      |     |     |     |     |     |     |     |
| grid # 2 |      | 118 | 118 | 112 | 100 | 90  | 105 | 92  |
| 79       |      |     |     |     |     |     |     |     |
| grid # 3 |      | 223 | 223 | 207 | 194 | 174 | 211 | 176 |
| 145      |      |     |     |     |     |     |     |     |
| grid # 4 |      | 224 | 223 | 208 | 342 | 311 | 387 | 293 |
| 274      |      |     |     |     |     |     |     |     |

number of gridpoints:

|    | atom | O1 | C23 | C18 | C19 | C20 | C21 | C22 |
|----|------|----|-----|-----|-----|-----|-----|-----|
| H2 |      |    |     |     |     |     |     |     |



|     |          |     |     |     |     |     |     |     |
|-----|----------|-----|-----|-----|-----|-----|-----|-----|
| 71  | grid # 1 | 111 | 74  | 89  | 88  | 88  | 89  | 89  |
| 112 | grid # 2 | 123 | 80  | 97  | 95  | 96  | 97  | 96  |
| 212 | grid # 3 | 257 | 149 | 183 | 183 | 182 | 184 | 183 |
| 211 | grid # 4 | 450 | 286 | 327 | 326 | 327 | 327 | 327 |

number of gridpoints:

|     |          |     |     |     |     |     |     |     |
|-----|----------|-----|-----|-----|-----|-----|-----|-----|
| H21 | atom     | H5  | H7  | H8  | H9  | H10 | H19 | H20 |
| 70  | grid # 1 | 71  | 73  | 73  | 73  | 66  | 71  | 71  |
| 108 | grid # 2 | 111 | 118 | 118 | 118 | 106 | 108 | 110 |
| 217 | grid # 3 | 212 | 222 | 223 | 224 | 202 | 218 | 216 |
| 215 | grid # 4 | 207 | 223 | 224 | 224 | 197 | 212 | 216 |

number of gridpoints:

|  |          |     |     |     |     |       |
|--|----------|-----|-----|-----|-----|-------|
|  | atom     | H22 | H11 | H12 | H13 | total |
|  | grid # 1 | 69  | 71  | 70  | 71  | 2863  |
|  | grid # 2 | 110 | 109 | 108 | 111 | 3731  |
|  | grid # 3 | 214 | 213 | 212 | 217 | 7186  |
|  | grid # 4 | 211 | 211 | 209 | 218 | 9912  |

end of program grid

start of program rwr  
end of program rwr

start of program scf

|      | i | u | d | i | g |                  | RMS     | maximum |
|------|---|---|---|---|---|------------------|---------|---------|
|      | t | p | i | c | r |                  | energy  | DIIS    |
|      | e | d | i | u | i | total energy     | density | error   |
|      | r | t | s | t | d |                  | change  |         |
| etot | 1 | N | N | 1 | U | -783.03317801295 | 1.9E-05 | 5.2E-04 |
| etot | 2 | Y | Y | 4 | M | -783.03322410261 | 4.6E-05 | 2.1E-04 |
| etot | 3 | Y | Y | 4 | M | -783.03323026551 | 6.2E-06 | 5.2E-05 |
| etot | 4 | Y | N | 4 | M | -783.03323331725 | 3.1E-06 | 0.0E+00 |

Energy components, in hartrees:

|     |                               |                   |
|-----|-------------------------------|-------------------|
| (A) | Nuclear repulsion.....        | 1414.94072931277  |
| (E) | Total one-electron terms..... | -3874.44892683825 |
| (I) | Total two-electron terms..... | 1676.47496420823  |

(L) Electronic energy..... -2197.97396263002 (E+I)  
(N) Total energy..... -783.03323331725 (A+L)

SCFE: SCF energy: HF -783.03323331725 hartrees iterations:  
4

HOMO energy: -0.30207  
LUMO energy: 0.12934

Orbital energies:

|           |           |           |           |           |           |
|-----------|-----------|-----------|-----------|-----------|-----------|
| -20.52679 | -15.60041 | -11.34609 | -11.28582 | -11.25677 | -11.25002 |
| -11.24318 | -11.24157 | -11.24048 | -11.23870 | -11.23799 | -11.23493 |
| -11.23127 | -11.23051 | -11.23016 | -11.22964 | -11.22850 | -11.22761 |
| -11.20911 | -1.39722  | -1.26958  | -1.16514  | -1.14899  | -1.10611  |
| -1.03012  | -1.01865  | -1.01795  | -1.01268  | -0.96261  | -0.93276  |
| -0.85820  | -0.83891  | -0.83339  | -0.82171  | -0.79608  | -0.74114  |
| -0.71103  | -0.69503  | -0.67280  | -0.66431  | -0.64465  | -0.63750  |
| -0.62741  | -0.61492  | -0.61213  | -0.60849  | -0.59705  | -0.58330  |
| -0.57639  | -0.55349  | -0.54870  | -0.54069  | -0.53087  | -0.51919  |
| -0.51482  | -0.50723  | -0.50110  | -0.49775  | -0.48458  | -0.46866  |
| -0.46291  | -0.42149  | -0.41165  | -0.34259  | -0.33290  | -0.32301  |
| -0.30207  | 0.12934   | 0.13403   | 0.14444   | 0.15231   | 0.20368   |
| 0.22963   | 0.24095   | 0.24898   | 0.26123   | 0.28810   |           |

end of program scf

start of program derla  
end of program derla

start of program rwr  
end of program rwr

start of program der1b

forces (hartrees/bohr) : total

| atom | label | x             | y             | z             |
|------|-------|---------------|---------------|---------------|
| 1    | H1    | 2.009787E-06  | 5.513706E-05  | 1.351264E-04  |
| 2    | C1    | 1.321892E-05  | -2.250161E-07 | 3.721129E-05  |
| 3    | C2    | -4.197925E-05 | 3.170594E-04  | 1.548409E-04  |
| 4    | C3    | -8.108976E-05 | 7.273175E-05  | -1.436090E-04 |
| 5    | C4    | -2.845503E-05 | 2.426566E-04  | 2.839050E-05  |
| 6    | C5    | -2.964024E-05 | 3.832562E-05  | -2.597070E-05 |
| 7    | C6    | -4.244912E-05 | 3.620935E-05  | -1.346349E-04 |
| 8    | C7    | -2.369886E-04 | 1.299283E-04  | -2.853163E-04 |
| 9    | H3    | 2.843962E-05  | -1.408228E-04 | 1.473250E-04  |
| 10   | H4    | -2.355475E-06 | -6.907360E-05 | -6.455204E-05 |

|       |       |               |               |               |
|-------|-------|---------------|---------------|---------------|
| 11    | H6    | -1.152681E-04 | 7.450662E-05  | -3.178092E-04 |
| 12    | C16   | -1.969633E-04 | -1.403705E-04 | 1.159929E-04  |
| 13    | C8    | 1.680767E-04  | 2.015960E-04  | -1.238589E-04 |
| 14    | N2    | -4.051292E-04 | 4.978379E-04  | -5.912989E-04 |
| 15    | C9    | 3.362542E-04  | -2.691790E-04 | 1.244593E-03  |
| 16    | C10   | -3.466211E-04 | -7.444472E-05 | 3.235407E-04  |
| 17    | O1    | -1.596396E-04 | 2.421969E-04  | -6.005190E-04 |
| 18    | C23   | -4.808766E-06 | -1.656182E-04 | 1.874576E-04  |
| 19    | C18   | 3.700599E-04  | -8.696416E-05 | -1.544217E-04 |
| 20    | C19   | -8.574665E-07 | -1.295772E-04 | -2.939109E-04 |
| 21    | C20   | 1.291058E-04  | -1.863535E-04 | -2.056099E-04 |
| 22    | C21   | -1.689381E-04 | 3.119957E-04  | 3.146566E-04  |
| 23    | C22   | -4.422643E-04 | -1.174591E-04 | -2.810819E-04 |
| 24    | H2    | 1.040526E-04  | 1.151951E-04  | -4.145322E-06 |
| 25    | H5    | 5.243907E-05  | 2.760510E-04  | 3.221320E-04  |
| 26    | H7    | 9.570046E-05  | 5.602606E-05  | 1.235507E-04  |
| 27    | H8    | -2.695225E-05 | 7.047751E-06  | -6.057148E-05 |
| 28    | H9    | -1.397125E-04 | 9.994178E-05  | 3.479694E-05  |
| 29    | H10   | 1.445351E-04  | 6.103886E-05  | 2.145055E-04  |
| 30    | H19   | 4.313937E-05  | 4.473298E-05  | 2.520898E-05  |
| 31    | H20   | -1.453667E-04 | 6.456276E-05  | -9.771683E-05 |
| 32    | H21   | -5.606348E-05 | 2.288666E-05  | -3.837125E-05 |
| 33    | H22   | -1.616229E-06 | -4.163522E-05 | 1.382352E-05  |
| 34    | H11   | -6.985654E-05 | -2.270576E-04 | -6.385733E-05 |
| 35    | H12   | 2.276885E-04  | -5.867645E-05 | 3.232349E-04  |
| 36    | H13   | 2.838489E-04  | -2.120761E-04 | -5.258176E-04 |
| ----- |       | -----         | -----         | -----         |
|       | total | -7.444461E-04 | 1.048131E-03  | -2.666858E-04 |

end of program derlb

start of program geopt 54

geometry optimization step 54

reading input hessian of dimension 108

in five columns format

reading input hessian of dimension 108

in five columns format

\*\* restarting optimization from step 53 \*\*

Level shifts adjusted to satisfy step-size constraints

Step size: 0.0107981

Cos(theta): 0.5061370

Final level shift: -1.9838567E-02

energy change: 3.4558E-05 \* ( 5.0000E-05 )

gradient maximum: 5.4724E-04 . ( 4.5000E-04 )

gradient rms: 9.1960E-05 \* ( 3.0000E-04 )

step size: 0.01080 trust radius: 0.01000

displacement maximum: 5.5467E-03 . ( 1.8000E-03 )  
displacement rms: 9.7761E-04 \* ( 1.2000E-03 )  
predicted energy change: -3.9323E-06 geom step: 1.0798E-02  
02 full step: 1.0798E-02  
molecular structure not yet converged...

center of mass moved by:  
x: -7.6328E-17 y: 2.7062E-16 z: 1.3878E-16

new geometry:

|      | angstroms     |               |               |
|------|---------------|---------------|---------------|
| atom | x             | y             | z             |
| H1   | -1.1808884946 | 1.8897821389  | -2.2322586386 |
| C1   | -1.0989064553 | 2.1219773734  | -1.1839158930 |
| C2   | -0.8853652790 | 2.6952373354  | 1.5044089141  |
| C3   | -0.8780731966 | 1.0880024937  | -0.2891918639 |
| C4   | -1.2060067519 | 3.4359682404  | -0.7594038837 |
| C5   | -1.0997580361 | 3.7145665621  | 0.5910542372  |
| C6   | -0.7668530693 | 1.3780327796  | 1.0725235878  |
| C7   | -0.7857896461 | -0.3510750743 | -0.7573867601 |
| H3   | -1.3729599797 | 4.2248483092  | -1.4708586162 |
| H4   | -1.1879593799 | 4.7267688649  | 0.9449260270  |
| H6   | -0.8177581902 | 2.9326123541  | 2.5484150014  |
| C16  | 0.6140947597  | -0.7630823130 | -1.2108160782 |
| C8   | -1.3980823017 | -1.2490640930 | 0.3406932522  |
| N2   | -0.5082455406 | 0.3377595873  | 1.9927758317  |
| C9   | -0.7823455573 | -0.9766991427 | 1.7032157695  |
| C10  | 0.0113457667  | 0.6544420130  | 3.3153783738  |
| O1   | -0.5828462117 | -1.8507322937 | 2.4992176106  |
| C23  | -1.3880279559 | -2.7405836558 | 0.0212107094  |
| C18  | 3.1415356867  | -1.5870115396 | -2.0918299927 |
| C19  | 0.7620892697  | -1.4852388318 | -2.3900542734 |
| C20  | 1.7600668918  | -0.4504122182 | -0.4841794631 |
| C21  | 3.0094291402  | -0.8614878589 | -0.9180017716 |
| C22  | 2.0117985612  | -1.8953977474 | -2.8292548894 |
| H2   | -0.1083386741 | -1.7335533775 | -2.9734061005 |
| H5   | 1.6836645145  | 0.1207813161  | 0.4211660164  |
| H7   | 3.8807379818  | -0.6110941617 | -0.3391902702 |
| H8   | 2.0991162346  | -2.4528170503 | -3.7456428533 |
| H9   | 4.1132261799  | -1.9034837478 | -2.4283197648 |
| H10  | -1.4317235397 | -0.4517251668 | -1.6234495507 |
| H19  | -0.3784263081 | -3.1277243751 | -0.0254555717 |
| H20  | -1.8684461124 | -2.9182163081 | -0.9363596389 |
| H21  | -1.9211834427 | -3.2925384779 | 0.7834406304  |
| H22  | -2.4351319781 | -0.9248252527 | 0.4382080597  |
| H11  | 0.8094041423  | 1.3818416781  | 3.2296827518  |
| H12  | 0.3927840267  | -0.2514783633 | 3.7527387889  |
| H13  | -0.7633912560 | 1.0546993235  | 3.9632691161  |

nuclear repulsion energy..... 1414.891375649 hartrees

-----  
/ end of geometry optimization iteration 54 /

-----  
end of program geopt

start of program onee  
smallest eigenvalue of S: 3.335E-04  
number of canonical orbitals..... 368  
end of program onee

start of program probe  
end of program probe

start of program grid

number of gridpoints:  
atom H1 C1 C2 C3 C4 C5 C6  
C7  
grid # 1 72 87 89 90 89 88 84  
81  
grid # 2 116 97 96 98 97 97 94  
90  
grid # 3 217 182 184 194 183 184 189  
177  
grid # 4 216 326 328 338 328 328 323  
314

number of gridpoints:  
atom H3 H4 H6 C16 C8 N2 C9  
C10  
grid # 1 73 73 70 92 82 95 82  
69  
grid # 2 118 118 112 100 90 105 92  
79  
grid # 3 223 223 207 194 174 211 176  
145  
grid # 4 224 223 208 342 311 387 293  
275

number of gridpoints:  
atom O1 C23 C18 C19 C20 C21 C22  
H2  
grid # 1 111 74 89 88 88 89 89  
71  
grid # 2 123 80 97 95 96 97 96  
112  
grid # 3 257 150 183 183 182 184 183  
212  
grid # 4 450 285 327 326 327 327 327  
211

```

number of gridpoints:
  atom      H5      H7      H8      H9      H10     H19     H20
H21
  grid # 1   71      73      73      73      67      71      71
70
  grid # 2  111     118     118     118     106     108     110
108
  grid # 3  212     223     223     224     202     218     216
217
  grid # 4  207     223     224     224     196     212     216
215

```

```

number of gridpoints:
  atom      H22     H11     H12     H13  total
grid # 1    69      71      70      71  2865
grid # 2   110     109     108     111  3730
grid # 3   214     213     212     217  7188
grid # 4   211     211     209     218  9910

```

end of program grid

```

start of program rwr
end of program rwr

```

start of program scf

|      | i | u | d | i | g |                  |         | RMS     | maximum |
|------|---|---|---|---|---|------------------|---------|---------|---------|
|      | t | p | i | c | r |                  |         | density | DIIS    |
|      | e | d | i | u | i | total energy     | energy  | change  | error   |
|      | r | t | s | t | d |                  | change  |         |         |
| etot | 1 | N | N | 1 | U | -783.03324514701 |         | 1.3E-05 | 2.7E-04 |
| etot | 2 | Y | Y | 4 | M | -783.03325823767 | 1.3E-05 | 4.1E-06 | 6.9E-05 |
| etot | 3 | Y | N | 4 | M | -783.03325972614 | 1.5E-06 | 0.0E+00 | 0.0E+00 |

Energy components, in hartrees:

```

(A) Nuclear repulsion..... 1414.89137564935
(E) Total one-electron terms..... -3874.35225017420
(I) Total two-electron terms..... 1676.42761479872
(L) Electronic energy..... -2197.92463537548 (E+I)
(N) Total energy..... -783.03325972614 (A+L)

```

```

SCFE: SCF energy: HF -783.03325972614 hartrees iterations:
3

```

```

HOMO energy: -0.30209
LUMO energy: 0.12934

```

Orbital energies:

|           |           |           |           |           |           |
|-----------|-----------|-----------|-----------|-----------|-----------|
| -20.52685 | -15.60029 | -11.34601 | -11.28585 | -11.25673 | -11.25001 |
| -11.24311 | -11.24158 | -11.24050 | -11.23869 | -11.23799 | -11.23492 |
| -11.23127 | -11.23050 | -11.23016 | -11.22964 | -11.22849 | -11.22765 |
| -11.20914 | -1.39727  | -1.26944  | -1.16510  | -1.14897  | -1.10603  |
| -1.03008  | -1.01865  | -1.01788  | -1.01270  | -0.96255  | -0.93275  |
| -0.85813  | -0.83889  | -0.83337  | -0.82173  | -0.79607  | -0.74110  |
| -0.71099  | -0.69502  | -0.67282  | -0.66429  | -0.64457  | -0.63754  |
| -0.62743  | -0.61488  | -0.61217  | -0.60853  | -0.59695  | -0.58333  |
| -0.57637  | -0.55347  | -0.54875  | -0.54065  | -0.53094  | -0.51911  |
| -0.51484  | -0.50721  | -0.50105  | -0.49775  | -0.48459  | -0.46866  |
| -0.46291  | -0.42148  | -0.41157  | -0.34258  | -0.33287  | -0.32297  |
| -0.30209  | 0.12934   | 0.13404   | 0.14442   | 0.15229   | 0.20386   |
| 0.22969   | 0.24097   | 0.24889   | 0.26136   | 0.28827   |           |

end of program scf

start of program derla

end of program derla

start of program rwr

end of program rwr

start of program der1b

forces (hartrees/bohr) : total

| atom | label | x             | y             | z             |
|------|-------|---------------|---------------|---------------|
| 1    | H1    | -1.557846E-05 | 1.909331E-05  | 8.792398E-05  |
| 2    | C1    | -6.615045E-06 | -5.113308E-06 | -7.490206E-06 |
| 3    | C2    | -2.163787E-05 | 2.170730E-04  | 2.440879E-05  |
| 4    | C3    | -4.803961E-05 | 6.059738E-05  | -2.105484E-04 |
| 5    | C4    | -3.758897E-05 | 1.588430E-04  | 1.109556E-04  |
| 6    | C5    | -2.375369E-05 | 5.111599E-05  | -4.973671E-05 |
| 7    | C6    | -3.384572E-05 | -3.947816E-05 | 1.519769E-05  |
| 8    | C7    | -1.725157E-04 | 1.046236E-05  | -1.162194E-04 |
| 9    | H3    | 5.832331E-06  | -9.250547E-05 | 1.177743E-04  |
| 10   | H4    | -7.571445E-06 | -6.435223E-05 | -2.494453E-05 |
| 11   | H6    | -3.706344E-05 | 5.458788E-05  | -1.335005E-04 |
| 12   | C16   | -1.084880E-04 | -1.784527E-04 | 1.824923E-05  |
| 13   | C8    | 1.633554E-04  | 1.375414E-04  | 1.550168E-05  |
| 14   | N2    | -9.861134E-05 | 3.722121E-04  | -4.499002E-04 |
| 15   | C9    | 6.635431E-05  | -1.471067E-04 | 7.969503E-04  |
| 16   | C10   | -4.239099E-04 | 2.081977E-04  | 1.607719E-04  |
| 17   | O1    | -1.238035E-04 | 1.390459E-04  | -3.526588E-04 |
| 18   | C23   | -3.225745E-05 | -2.422860E-05 | 4.198379E-05  |
| 19   | C18   | 1.914918E-04  | 4.791890E-05  | -8.209416E-06 |

S547

|       |       |               |               |               |
|-------|-------|---------------|---------------|---------------|
| 20    | C19   | -5.629705E-05 | -8.353819E-05 | -1.946208E-04 |
| 21    | C20   | 2.129825E-04  | -4.153653E-04 | -4.358897E-04 |
| 22    | C21   | -3.440109E-04 | 1.067036E-04  | 1.542453E-05  |
| 23    | C22   | -3.277768E-04 | -3.603680E-05 | -1.960225E-04 |
| 24    | H2    | 1.812240E-05  | 1.199201E-04  | -3.360019E-05 |
| 25    | H5    | 2.770088E-05  | 4.607813E-04  | 4.940732E-04  |
| 26    | H7    | 2.445453E-04  | 1.115868E-04  | 2.099182E-04  |
| 27    | H8    | -6.022483E-05 | 3.551908E-05  | 3.116587E-05  |
| 28    | H9    | -3.287708E-05 | 8.013944E-05  | 5.279441E-05  |
| 29    | H10   | 5.806747E-05  | 8.002471E-05  | 6.885619E-05  |
| 30    | H19   | 2.788493E-05  | 2.928524E-05  | 1.200502E-05  |
| 31    | H20   | -6.551069E-05 | 4.254804E-05  | -5.127353E-05 |
| 32    | H21   | -1.826397E-05 | 3.952308E-05  | -2.778255E-05 |
| 33    | H22   | 7.891052E-06  | 2.638067E-05  | 1.099637E-05  |
| 34    | H11   | -1.240271E-04 | -7.498921E-05 | -2.730063E-05 |
| 35    | H12   | 1.387464E-04  | -1.691782E-04 | 1.305933E-04  |
| 36    | H13   | 3.060384E-04  | -1.919730E-04 | -3.754518E-04 |
| ----- |       | -----         | -----         | -----         |
|       | total | -7.512553E-04 | 1.086783E-03  | -2.796055E-04 |

end of program derlb

start of program geopt 55

geometry optimization step 55

reading input hessian of dimension 108

in five columns format

reading input hessian of dimension 108

in five columns format

\*\* restarting optimization from step 53 \*\*

Level shifts adjusted to satisfy step-size constraints

Step size: 0.0105038

Cos(theta): 0.4758084

Final level shift: -1.5642341E-02

energy change: 8.1491E-06 \* ( 5.0000E-05 )

gradient maximum: 5.4724E-04 . ( 4.5000E-04 )

gradient rms: 9.1960E-05 \* ( 3.0000E-04 )

step size: 0.01050 trust radius: 0.01000

displacement maximum: 5.8157E-03 . ( 1.8000E-03 )

displacement rms: 9.5097E-04 \* ( 1.2000E-03 )

predicted energy change: -3.4011E-06 geom step: 1.0504E-

02 full step: 1.0504E-02

molecular structure not yet converged...

center of mass moved by:

x: 1.4572E-16 y: -1.0963E-15 z: 8.3267E-17



new geometry:

|      | angstroms     |               |               |
|------|---------------|---------------|---------------|
| atom | x             | y             | z             |
| H1   | -1.1799100718 | 1.8898995885  | -2.2322329625 |
| C1   | -1.0983163375 | 2.1220312076  | -1.1839185242 |
| C2   | -0.8857155668 | 2.6953496590  | 1.5044014209  |
| C3   | -0.8782353531 | 1.0879491939  | -0.2891989199 |
| C4   | -1.2050970136 | 3.4360582873  | -0.7594886488 |
| C5   | -1.0993776441 | 3.7146594757  | 0.5909437708  |
| C6   | -0.7674092348 | 1.3780413884  | 1.0725755577  |
| C7   | -0.7859911141 | -0.3512185128 | -0.7572882358 |
| H3   | -1.3713536947 | 4.2248674483  | -1.4709800974 |
| H4   | -1.1873571163 | 4.7268667324  | 0.9446667904  |
| H6   | -0.8186388885 | 2.9328864171  | 2.5482426649  |
| C16  | 0.6138983530  | -0.7634172563 | -1.2105702538 |
| C8   | -1.3981840927 | -1.2491829274 | 0.3408635973  |
| N2   | -0.5090644922 | 0.3376940663  | 1.9928825053  |
| C9   | -0.7825778951 | -0.9770650176 | 1.7036163486  |
| C10  | 0.0115272626  | 0.6536514328  | 3.3152192128  |
| O1   | -0.5832412670 | -1.8516418014 | 2.4991247915  |
| C23  | -1.3885265446 | -2.7408219174 | 0.0214822387  |
| C18  | 3.1415791620  | -1.5861906626 | -2.0919890740 |
| C19  | 0.7621666278  | -1.4859347804 | -2.3894551978 |
| C20  | 1.7597732805  | -0.4497120230 | -0.4845303191 |
| C21  | 3.0092489734  | -0.8600881083 | -0.9185335773 |
| C22  | 2.0119030521  | -1.8957108546 | -2.8288204330 |
| H2   | -0.1080084481 | -1.7344093552 | -2.9725890454 |
| H5   | 1.6834093239  | 0.1223444677  | 0.4203230613  |
| H7   | 3.8804601471  | -0.6088749823 | -0.3401834708 |
| H8   | 2.0994190190  | -2.4535406399 | -3.7448086728 |
| H9   | 4.1133186819  | -1.9020349436 | -2.4286168057 |
| H10  | -1.4317539531 | -0.4518571669 | -1.6232613724 |
| H19  | -0.3789538018 | -3.1282056898 | -0.0250513646 |
| H20  | -1.8690994697 | -2.9181393258 | -0.9361711511 |
| H21  | -1.9220610200 | -3.2925991781 | 0.7835859122  |
| H22  | -2.4352688833 | -0.9250718290 | 0.4384740446  |
| H11  | 0.8104470787  | 1.3803578737  | 3.2284492921  |
| H12  | 0.3929253844  | -0.2527750502 | 3.7533838518  |
| H13  | -0.7631486517 | 1.0549141051  | 3.9628018827  |

nuclear repulsion energy..... 1414.880671647 hartrees

-----  
/ end of geometry optimization iteration 55 /  
-----

end of program geopt

start of program onee

smallest eigenvalue of S: 3.335E-04

number of canonical orbitals..... 368

end of program onee

start of program probe  
end of program probe

start of program grid

number of gridpoints:

| atom     | H1  | C1  | C2  | C3  | C4  | C5  | C6  |
|----------|-----|-----|-----|-----|-----|-----|-----|
| C7       |     |     |     |     |     |     |     |
| grid # 1 | 72  | 87  | 89  | 90  | 89  | 88  | 84  |
| 81       |     |     |     |     |     |     |     |
| grid # 2 | 116 | 97  | 96  | 98  | 97  | 97  | 94  |
| 90       |     |     |     |     |     |     |     |
| grid # 3 | 217 | 182 | 184 | 194 | 183 | 184 | 189 |
| 177      |     |     |     |     |     |     |     |
| grid # 4 | 216 | 326 | 328 | 338 | 328 | 328 | 323 |
| 314      |     |     |     |     |     |     |     |

number of gridpoints:

| atom     | H3  | H4  | H6  | C16 | C8  | N2  | C9  |
|----------|-----|-----|-----|-----|-----|-----|-----|
| C10      |     |     |     |     |     |     |     |
| grid # 1 | 73  | 73  | 70  | 92  | 82  | 95  | 82  |
| 69       |     |     |     |     |     |     |     |
| grid # 2 | 118 | 118 | 112 | 100 | 90  | 105 | 92  |
| 80       |     |     |     |     |     |     |     |
| grid # 3 | 223 | 223 | 207 | 194 | 174 | 211 | 176 |
| 144      |     |     |     |     |     |     |     |
| grid # 4 | 224 | 223 | 208 | 342 | 311 | 387 | 293 |
| 273      |     |     |     |     |     |     |     |

number of gridpoints:

| atom     | O1  | C23 | C18 | C19 | C20 | C21 | C22 |
|----------|-----|-----|-----|-----|-----|-----|-----|
| H2       |     |     |     |     |     |     |     |
| grid # 1 | 111 | 74  | 89  | 88  | 88  | 89  | 89  |
| 71       |     |     |     |     |     |     |     |
| grid # 2 | 123 | 79  | 97  | 95  | 96  | 97  | 96  |
| 112      |     |     |     |     |     |     |     |
| grid # 3 | 257 | 149 | 183 | 183 | 182 | 184 | 183 |
| 212      |     |     |     |     |     |     |     |
| grid # 4 | 450 | 286 | 327 | 326 | 327 | 327 | 327 |
| 211      |     |     |     |     |     |     |     |

number of gridpoints:

| atom     | H5  | H7  | H8  | H9  | H10 | H19 | H20 |
|----------|-----|-----|-----|-----|-----|-----|-----|
| H21      |     |     |     |     |     |     |     |
| grid # 1 | 71  | 73  | 73  | 73  | 67  | 71  | 71  |
| 70       |     |     |     |     |     |     |     |
| grid # 2 | 111 | 118 | 118 | 118 | 106 | 108 | 110 |
| 108      |     |     |     |     |     |     |     |

```

grid # 3      212    222    223    224    202    218    217
217
grid # 4      207    223    224    224    196    212    216
215

```

number of gridpoints:

| atom     | H22 | H11 | H12 | H13 | total |
|----------|-----|-----|-----|-----|-------|
| grid # 1 | 69  | 71  | 70  | 71  | 2865  |
| grid # 2 | 110 | 109 | 108 | 111 | 3730  |
| grid # 3 | 214 | 213 | 212 | 217 | 7186  |
| grid # 4 | 211 | 211 | 209 | 218 | 9909  |

end of program grid

start of program rwr  
end of program rwr

start of program scf

|      | i | u | d | i | g |                  | energy  | RMS     | maximum |
|------|---|---|---|---|---|------------------|---------|---------|---------|
|      | t | p | i | c | r |                  | change  | density | DIIS    |
|      | e | d | i | u | i | total energy     |         | change  | error   |
|      | r | t | s | t | d |                  |         |         |         |
| etot | 1 | N | N | 1 | U | -783.03325921999 |         | 6.4E-06 | 1.3E-04 |
| etot | 2 | Y | Y | 4 | M | -783.03326131730 | 2.1E-06 | 2.2E-06 | 5.6E-05 |
| etot | 3 | Y | N | 4 | M | -783.03326233200 | 1.0E-06 | 0.0E+00 | 0.0E+00 |

Energy components, in hartrees:

|     |                               |                   |       |
|-----|-------------------------------|-------------------|-------|
| (A) | Nuclear repulsion.....        | 1414.88067164681  |       |
| (E) | Total one-electron terms..... | -3874.33130696955 |       |
| (I) | Total two-electron terms..... | 1676.41737299074  |       |
| (L) | Electronic energy.....        | -2197.91393397881 | (E+I) |
| (N) | Total energy.....             | -783.03326233200  | (A+L) |

SCFE: SCF energy: HF -783.03326233200 hartrees iterations:  
3

HOMO energy: -0.30211  
LUMO energy: 0.12934

Orbital energies:

|           |           |           |           |           |           |
|-----------|-----------|-----------|-----------|-----------|-----------|
| -20.52693 | -15.60025 | -11.34597 | -11.28589 | -11.25678 | -11.24998 |
| -11.24305 | -11.24158 | -11.24049 | -11.23871 | -11.23800 | -11.23494 |
| -11.23126 | -11.23049 | -11.23018 | -11.22960 | -11.22849 | -11.22761 |
| -11.20915 | -1.39721  | -1.26942  | -1.16512  | -1.14901  | -1.10601  |
| -1.03007  | -1.01867  | -1.01790  | -1.01273  | -0.96242  | -0.93275  |
| -0.85809  | -0.83889  | -0.83338  | -0.82177  | -0.79608  | -0.74111  |

|          |          |          |          |          |          |
|----------|----------|----------|----------|----------|----------|
| -0.71097 | -0.69504 | -0.67282 | -0.66431 | -0.64454 | -0.63755 |
| -0.62744 | -0.61491 | -0.61219 | -0.60855 | -0.59687 | -0.58335 |
| -0.57638 | -0.55343 | -0.54874 | -0.54061 | -0.53093 | -0.51903 |
| -0.51485 | -0.50720 | -0.50107 | -0.49776 | -0.48460 | -0.46866 |
| -0.46290 | -0.42148 | -0.41152 | -0.34262 | -0.33287 | -0.32299 |
| -0.30211 | 0.12934  | 0.13404  | 0.14442  | 0.15228  | 0.20391  |
| 0.22971  | 0.24096  | 0.24885  | 0.26138  | 0.28823  |          |

end of program scf

start of program derla  
end of program derla

start of program rwr  
end of program rwr

start of program der1b

forces (hartrees/bohr) : total

| atom | label | x             | y             | z             |
|------|-------|---------------|---------------|---------------|
| 1    | H1    | -1.749000E-05 | 8.711360E-06  | 3.667251E-05  |
| 2    | C1    | -1.645016E-05 | 1.144735E-05  | -2.636625E-05 |
| 3    | C2    | -3.000772E-05 | 1.123093E-04  | -5.008545E-05 |
| 4    | C3    | -1.411692E-05 | 3.177434E-05  | -1.192363E-04 |
| 5    | C4    | -3.279182E-05 | 8.437073E-05  | 1.137831E-04  |
| 6    | C5    | -2.457905E-05 | 5.395061E-05  | -6.651527E-05 |
| 7    | C6    | 3.413228E-06  | -7.756193E-05 | 4.479291E-05  |
| 8    | C7    | -8.703170E-05 | -1.700346E-05 | -8.896058E-06 |
| 9    | H3    | -1.542373E-05 | -2.381602E-05 | 5.475093E-05  |
| 10   | H4    | -1.726452E-05 | -2.658623E-05 | -1.229626E-06 |
| 11   | H6    | -8.399232E-06 | 4.335350E-05  | 5.450883E-07  |
| 12   | C16   | -1.518763E-04 | -7.777962E-05 | -3.681900E-05 |
| 13   | C8    | 7.995412E-05  | 3.687085E-05  | 8.798725E-05  |
| 14   | N2    | -2.350112E-06 | -7.172780E-05 | -2.459148E-04 |
| 15   | C9    | -9.171887E-05 | -1.461367E-04 | 4.503970E-04  |
| 16   | C10   | -2.248068E-04 | 1.945003E-04  | 3.383153E-04  |
| 17   | O1    | -2.382327E-05 | 4.053541E-04  | -3.348692E-04 |
| 18   | C23   | -2.778282E-05 | 3.300922E-05  | -4.729064E-05 |
| 19   | C18   | 1.891842E-04  | 9.526208E-05  | 8.908498E-05  |
| 20   | C19   | 5.600796E-06  | -5.576541E-05 | -1.784688E-04 |
| 21   | C20   | 2.987256E-04  | -3.277978E-04 | -3.353849E-04 |
| 22   | C21   | -3.442854E-04 | 2.298487E-05  | -4.611124E-05 |
| 23   | C22   | -3.502592E-04 | 4.481850E-07  | -1.666977E-04 |
| 24   | H2    | -1.570598E-04 | 3.829258E-05  | -1.436904E-04 |
| 25   | H5    | 1.961258E-05  | 4.217267E-04  | 5.015034E-04  |
| 26   | H7    | 3.277167E-04  | 1.393539E-04  | 2.737490E-04  |
| 27   | H8    | -8.260342E-05 | 3.942657E-06  | -4.727012E-05 |

|       |       |               |               |               |
|-------|-------|---------------|---------------|---------------|
| 28    | H9    | 3.165801E-05  | 4.776196E-05  | 4.444761E-05  |
| 29    | H10   | -2.445490E-05 | 6.095446E-05  | -1.796525E-05 |
| 30    | H19   | -2.530227E-05 | 2.836178E-05  | -1.433523E-06 |
| 31    | H20   | -1.228766E-05 | 2.885540E-05  | -3.720262E-06 |
| 32    | H21   | 6.855388E-06  | 5.299271E-05  | -2.404386E-05 |
| 33    | H22   | 7.386567E-06  | 5.527752E-05  | 3.405201E-06  |
| 34    | H11   | -2.645177E-04 | -1.473943E-04 | 9.281596E-05  |
| 35    | H12   | -1.393942E-04 | 2.427787E-04  | -1.598089E-04 |
| 36    | H13   | 4.827509E-04  | -2.027214E-04 | -3.397871E-04 |
| ----- |       |               |               |               |
|       | total | -7.332195E-04 | 1.080355E-03  | -2.693544E-04 |

end of program derlb

start of program geopt 56

geometry optimization step 56

\*\* stopping now - optimization seems to be stuck \*\*

\*\*\*\*\*  
 \*\* Geometry optimization complete \*\*  
 \*\*\*\*\*

center of mass moved by:

x: 0.0000E+00 y: 0.0000E+00 z: 0.0000E+00

final geometry:

|      | angstroms     |               |               |
|------|---------------|---------------|---------------|
| atom | x             | y             | z             |
| H1   | -1.1799100718 | 1.8898995885  | -2.2322329625 |
| C1   | -1.0983163375 | 2.1220312076  | -1.1839185242 |
| C2   | -0.8857155668 | 2.6953496590  | 1.5044014209  |
| C3   | -0.8782353531 | 1.0879491939  | -0.2891989199 |
| C4   | -1.2050970136 | 3.4360582873  | -0.7594886488 |
| C5   | -1.0993776441 | 3.7146594757  | 0.5909437708  |
| C6   | -0.7674092348 | 1.3780413884  | 1.0725755577  |
| C7   | -0.7859911141 | -0.3512185128 | -0.7572882358 |
| H3   | -1.3713536947 | 4.2248674483  | -1.4709800974 |
| H4   | -1.1873571163 | 4.7268667324  | 0.9446667904  |
| H6   | -0.8186388885 | 2.9328864171  | 2.5482426649  |
| C16  | 0.6138983530  | -0.7634172563 | -1.2105702538 |
| C8   | -1.3981840927 | -1.2491829274 | 0.3408635973  |
| N2   | -0.5090644922 | 0.3376940663  | 1.9928825053  |
| C9   | -0.7825778951 | -0.9770650176 | 1.7036163486  |
| C10  | 0.0115272626  | 0.6536514328  | 3.3152192128  |
| O1   | -0.5832412670 | -1.8516418014 | 2.4991247915  |
| C23  | -1.3885265446 | -2.7408219174 | 0.0214822387  |
| C18  | 3.1415791620  | -1.5861906626 | -2.0919890740 |
| C19  | 0.7621666278  | -1.4859347804 | -2.3894551978 |
| C20  | 1.7597732805  | -0.4497120230 | -0.4845303191 |

|     |               |               |               |
|-----|---------------|---------------|---------------|
| C21 | 3.0092489734  | -0.8600881083 | -0.9185335773 |
| C22 | 2.0119030521  | -1.8957108546 | -2.8288204330 |
| H2  | -0.1080084481 | -1.7344093552 | -2.9725890454 |
| H5  | 1.6834093239  | 0.1223444677  | 0.4203230613  |
| H7  | 3.8804601471  | -0.6088749823 | -0.3401834708 |
| H8  | 2.0994190190  | -2.4535406399 | -3.7448086728 |
| H9  | 4.1133186819  | -1.9020349436 | -2.4286168057 |
| H10 | -1.4317539531 | -0.4518571669 | -1.6232613724 |
| H19 | -0.3789538018 | -3.1282056898 | -0.0250513646 |
| H20 | -1.8690994697 | -2.9181393258 | -0.9361711511 |
| H21 | -1.9220610200 | -3.2925991781 | 0.7835859122  |
| H22 | -2.4352688833 | -0.9250718290 | 0.4384740446  |
| H11 | 0.8104470787  | 1.3803578737  | 3.2284492921  |
| H12 | 0.3929253844  | -0.2527750502 | 3.7533838518  |
| H13 | -0.7631486517 | 1.0549141051  | 3.9628018827  |

nuclear repulsion energy..... 1414.880671647 hartrees

-----  
/ end of geometry optimization iteration 56 /  
-----

end of program geopt

start of program post  
Writing a SPARTAN archive file  
end of program post

Total cpu seconds      user:      3923.109      user+sys:      3923.109

CIS 2 (PH\_EQ - ME\_AX)

```
+-----+
---+
| Jaguar version 3.5, release 42
|
|
| Copyright 1991-1998 Schrodinger, Inc.
|
| All Rights Reserved.
|
|
| Use of this program should be acknowledged in publications
as: |
| Jaguar 3.5, Schrodinger, Inc., Portland, Oregon, 1998.
|
+-----+
-----+
```

start of program pre  
Job name: WF29000  
Executables used: D:\TITAN  
Temporary files : C:\Users\gfabr\AppData\Local\Temp\WF29000

Input file comments:  
Molecule001  
This file created by Spartan

basis set: 6-31G\*\*  
net molecular charge: 0  
multiplicity: 1

number of basis functions.... 370

Input geometry:

|      | angstroms     |               |               |
|------|---------------|---------------|---------------|
| atom | x             | y             | z             |
| H1   | -0.1057860000 | 1.2372270000  | -2.1093050000 |
| C1   | -0.0774240000 | 1.7068310000  | -1.1175650000 |
| C2   | 0.0087040000  | 2.9151390000  | 1.3846380000  |
| C3   | 0.2607620000  | 0.9372920000  | -0.0057490000 |
| C4   | -0.3782970000 | 3.0571860000  | -0.9878350000 |
| C5   | -0.3455530000 | 3.6562940000  | 0.2650770000  |
| C6   | 0.3324840000  | 1.5574230000  | 1.2576320000  |
| C7   | 0.6189860000  | -0.5157620000 | -0.1363140000 |
| H3   | -0.6426930000 | 3.6449960000  | -1.8726740000 |
| H4   | -0.5961860000 | 4.7167940000  | 0.3731070000  |
| H6   | 0.0290920000  | 3.4098080000  | 2.3636220000  |
| H7   | 1.7409960000  | -0.5338270000 | -0.1838720000 |
| C10  | 0.1103230000  | -1.2048020000 | -1.3745680000 |

S555

|     |               |               |               |
|-----|---------------|---------------|---------------|
| C8  | 0.2067290000  | -1.3009890000 | 1.1228110000  |
| C17 | -1.2938690000 | -1.4425820000 | 1.3172120000  |
| N2  | 0.7183370000  | 0.8050980000  | 2.4281180000  |
| C9  | 0.8036850000  | -0.6169380000 | 2.3464920000  |
| C16 | 1.4234250000  | 1.5370750000  | 3.5045810000  |
| O1  | 1.3001730000  | -1.2312870000 | 3.2789440000  |
| C11 | -0.7655750000 | -2.5633220000 | -3.6565150000 |
| C12 | 0.9837500000  | -2.0329400000 | -2.0855370000 |
| C13 | -1.2057310000 | -1.0644300000 | -1.8202950000 |
| C14 | -1.6399100000 | -1.7403290000 | -2.9551680000 |
| C15 | 0.5467140000  | -2.7078020000 | -3.2195810000 |
| H19 | 2.0203760000  | -2.1543720000 | -1.7485610000 |
| H20 | -1.8973790000 | -0.4123760000 | -1.2713980000 |
| H21 | -2.6741570000 | -1.6229390000 | -3.2953130000 |
| H22 | 1.2388710000  | -3.3545650000 | -3.7688460000 |
| H23 | -1.1089860000 | -3.0954060000 | -4.5495090000 |
| H27 | -1.8057990000 | -0.4707090000 | 1.3005120000  |
| H29 | -1.7350530000 | -2.0581730000 | 0.5209810000  |
| H30 | 0.6441890000  | -2.3278130000 | 1.0421280000  |
| H15 | -1.5241950000 | -1.9275430000 | 2.2746670000  |
| H2  | 2.0644920000  | 2.3308300000  | 3.0949130000  |
| H5  | 2.0560900000  | 0.8683330000  | 4.1042560000  |
| H8  | 0.6884140000  | 1.9985800000  | 4.1789160000  |

Molecular weight: 251.13 amu

Stoichiometry: C17NH17O

Molecular Point Group: C1

Point Group used: C1

nuclear repulsion energy..... 1394.502457810 hartrees

Non-default options chosen:

Geometry will be optimized in redundant internal coordinates

Initial Hessian: from previous calculation

end of program pre

start of program onee

smallest eigenvalue of S: 3.549E-04

number of canonical orbitals..... 368

end of program onee

start of program hfig

initial wavefunction generated automatically from atomic  
wavefunctions

| Irreducible    | Total no | No of occupied orbitals |         |     |
|----------------|----------|-------------------------|---------|-----|
| representation | orbitals | Shell_1                 | Shell_2 | ... |
| No Symm        | 368      | 67                      |         |     |

-----



Orbital occupation/shell 1.000

end of program hfig

start of program probe

end of program probe

start of program grid

number of gridpoints:

| atom     | H1  | C1  | C2  | C3  | C4  | C5  | C6  |
|----------|-----|-----|-----|-----|-----|-----|-----|
| C7       |     |     |     |     |     |     |     |
| grid # 1 | 71  | 88  | 88  | 88  | 89  | 89  | 86  |
| 81       |     |     |     |     |     |     |     |
| grid # 2 | 114 | 96  | 95  | 98  | 97  | 97  | 96  |
| 90       |     |     |     |     |     |     |     |
| grid # 3 | 211 | 184 | 184 | 192 | 184 | 185 | 189 |
| 175      |     |     |     |     |     |     |     |
| grid # 4 | 217 | 327 | 328 | 337 | 327 | 327 | 327 |
| 309      |     |     |     |     |     |     |     |

number of gridpoints:

| atom     | H3  | H4  | H6  | H7  | C10 | C8  | C17 |
|----------|-----|-----|-----|-----|-----|-----|-----|
| N2       |     |     |     |     |     |     |     |
| grid # 1 | 73  | 73  | 70  | 69  | 92  | 82  | 72  |
| 98       |     |     |     |     |     |     |     |
| grid # 2 | 118 | 118 | 113 | 109 | 100 | 91  | 79  |
| 105      |     |     |     |     |     |     |     |
| grid # 3 | 224 | 223 | 209 | 213 | 196 | 175 | 153 |
| 215      |     |     |     |     |     |     |     |
| grid # 4 | 232 | 232 | 217 | 208 | 341 | 310 | 296 |
| 393      |     |     |     |     |     |     |     |

number of gridpoints:

| atom     | C9  | C16 | O1  | C11 | C12 | C13 | C14 |
|----------|-----|-----|-----|-----|-----|-----|-----|
| C15      |     |     |     |     |     |     |     |
| grid # 1 | 86  | 73  | 111 | 89  | 87  | 87  | 88  |
| 89       |     |     |     |     |     |     |     |
| grid # 2 | 94  | 80  | 122 | 97  | 95  | 95  | 95  |
| 97       |     |     |     |     |     |     |     |
| grid # 3 | 178 | 149 | 262 | 185 | 184 | 182 | 183 |
| 185      |     |     |     |     |     |     |     |
| grid # 4 | 298 | 280 | 459 | 327 | 328 | 326 | 326 |
| 327      |     |     |     |     |     |     |     |

number of gridpoints:

| atom     | H19 | H20 | H21 | H22 | H23 | H27 | H29 |
|----------|-----|-----|-----|-----|-----|-----|-----|
| H30      |     |     |     |     |     |     |     |
| grid # 1 | 72  | 69  | 73  | 73  | 73  | 72  | 70  |
| 69       |     |     |     |     |     |     |     |

```

grid # 2      113    111    118    118    118    108    109
111
grid # 3      214    210    224    224    224    214    209
215
grid # 4      222    214    232    232    232    215    212
216

```

number of gridpoints:

| atom     | H15 | H2  | H5  | H8  | total |
|----------|-----|-----|-----|-----|-------|
| grid # 1 | 71  | 71  | 70  | 71  | 2873  |
| grid # 2 | 111 | 110 | 110 | 110 | 3738  |
| grid # 3 | 219 | 215 | 215 | 217 | 7220  |
| grid # 4 | 225 | 221 | 222 | 222 | 10064 |

end of program grid

start of program rwr

end of program rwr

start of program scf

```

number of electrons..... 134
number of alpha electrons.... 67
number of beta electrons..... 67
number of orbitals, total.... 368
number of core orbitals..... 67
number of open shell orbs.... 0
number of occupied orbitals.. 67
number of virtual orbitals... 301
number of hamiltonians..... 1
number of shells..... 1
SCF type: HF

```

|      | i  | u | d | i | g |                  | RMS     | maximum |
|------|----|---|---|---|---|------------------|---------|---------|
|      | t  | p | i | c | r |                  | density | DIIS    |
|      | e  | d | i | u | i | energy           | change  | error   |
|      | r  | t | s | t | d | total energy     |         |         |
| etot | 1  | N | N | 5 | M | -780.39716462191 | 4.5E-03 | 1.0E-01 |
| etot | 2  | Y | Y | 6 | M | -782.67604398440 | 2.3E+00 | 4.2E-02 |
| etot | 3  | Y | Y | 6 | M | -782.93083475678 | 2.5E-01 | 2.6E-02 |
| etot | 4  | N | Y | 2 | U | -782.99815335980 | 6.7E-02 | 1.2E-02 |
| etot | 5  | Y | Y | 6 | M | -783.00797122904 | 9.8E-03 | 6.9E-03 |
| etot | 6  | N | Y | 2 | U | -783.01277668103 | 4.8E-03 | 1.6E-03 |
| etot | 7  | Y | Y | 6 | M | -783.01303150056 | 2.5E-04 | 4.3E-04 |
| etot | 8  | Y | Y | 6 | M | -783.01308149635 | 5.0E-05 | 1.5E-04 |
| etot | 9  | Y | Y | 6 | M | -783.01309224379 | 1.1E-05 | 4.9E-05 |
| etot | 10 | Y | N | 6 | M | -783.01309985574 | 7.6E-06 | 0.0E+00 |

Energy components, in hartrees:

(A) Nuclear repulsion..... 1394.50245781033  
 (E) Total one-electron terms..... -3833.55266757138  
 (I) Total two-electron terms..... 1656.03710990532  
 (L) Electronic energy..... -2177.51555766607 (E+I)  
 (N) Total energy..... -783.01309985574 (A+L)

SCFE: SCF energy: HF -783.01309985574 hartrees iterations:  
 10

HOMO energy: -0.30079  
 LUMO energy: 0.12588

Orbital energies:

|           |           |           |           |           |           |
|-----------|-----------|-----------|-----------|-----------|-----------|
| -20.52986 | -15.60154 | -11.35514 | -11.28848 | -11.26329 | -11.25408 |
| -11.25208 | -11.24667 | -11.24510 | -11.24177 | -11.24106 | -11.24095 |
| -11.23973 | -11.23900 | -11.23875 | -11.23858 | -11.23844 | -11.23226 |
| -11.22501 | -1.37812  | -1.24651  | -1.16925  | -1.14295  | -1.10953  |
| -1.03367  | -1.01922  | -1.01501  | -1.00848  | -0.94572  | -0.93727  |
| -0.85525  | -0.83859  | -0.82928  | -0.82346  | -0.78547  | -0.72894  |
| -0.70784  | -0.69302  | -0.66771  | -0.65598  | -0.63960  | -0.63318  |
| -0.62732  | -0.61241  | -0.60570  | -0.60029  | -0.59331  | -0.58483  |
| -0.57654  | -0.56336  | -0.54773  | -0.54100  | -0.52244  | -0.51845  |
| -0.51645  | -0.50676  | -0.50121  | -0.49229  | -0.48309  | -0.47309  |
| -0.46665  | -0.41640  | -0.40777  | -0.34208  | -0.33746  | -0.32594  |
| -0.30079  | 0.12588   | 0.13248   | 0.13692   | 0.14883   | 0.19406   |
| 0.22831   | 0.23459   | 0.24692   | 0.26017   | 0.26392   |           |

end of program scf

start of program derla  
 end of program derla

start of program rwr  
 end of program rwr

start of program der1b

forces (hartrees/bohr) : total

| atom | label | x             | y             | z             |
|------|-------|---------------|---------------|---------------|
| 1    | H1    | 8.997518E-04  | 8.927038E-03  | 1.651197E-02  |
| 2    | C1    | 2.156175E-04  | 1.193059E-03  | -5.081797E-03 |
| 3    | C2    | 1.377866E-03  | 1.434696E-03  | 7.770498E-03  |
| 4    | C3    | -5.157992E-03 | 1.584632E-02  | 2.338222E-03  |
| 5    | C4    | -2.340849E-03 | 7.110679E-03  | -7.813980E-03 |
| 6    | C5    | -1.147408E-03 | 6.380521E-03  | -1.693814E-03 |
| 7    | C6    | -2.707703E-03 | -3.414009E-03 | 1.026601E-02  |

|       |       |               |               |               |
|-------|-------|---------------|---------------|---------------|
| 8     | C7    | 2.372971E-02  | -3.756886E-03 | 3.379968E-03  |
| 9     | H3    | 3.230621E-03  | -7.362990E-03 | 1.099796E-02  |
| 10    | H4    | 3.220901E-03  | -1.345732E-02 | -8.237696E-04 |
| 11    | H6    | -2.481048E-04 | -9.449784E-03 | -1.461730E-02 |
| 12    | H7    | -2.019941E-02 | -3.787618E-03 | 1.997602E-03  |
| 13    | C10   | 4.604323E-03  | -5.148018E-03 | -1.123617E-02 |
| 14    | C8    | 1.522449E-02  | -1.002481E-02 | 2.748988E-03  |
| 15    | C17   | -2.282109E-02 | -3.159582E-03 | 1.160608E-03  |
| 16    | N2    | 9.527139E-03  | -1.921381E-02 | -2.997208E-02 |
| 17    | C9    | 2.336285E-02  | 1.305733E-02  | 5.283429E-02  |
| 18    | C16   | -1.926816E-03 | -3.772220E-03 | 8.688964E-03  |
| 19    | O1    | -1.992287E-02 | 1.724732E-02  | -3.903475E-02 |
| 20    | C11   | -1.325901E-03 | -4.946514E-03 | -7.433820E-03 |
| 21    | C12   | 2.158934E-03  | -2.953273E-04 | 1.052682E-03  |
| 22    | C13   | -6.841971E-03 | 2.158855E-03  | 1.744087E-03  |
| 23    | C14   | -8.184736E-03 | 1.412389E-03  | -1.044596E-03 |
| 24    | C15   | 4.307498E-03  | -6.397625E-03 | -5.283559E-03 |
| 25    | H19   | -1.380148E-02 | 2.371939E-03  | -4.250498E-03 |
| 26    | H20   | 1.020278E-02  | -1.010793E-02 | -1.027671E-02 |
| 27    | H21   | 1.285188E-02  | -1.383261E-03 | 4.225558E-03  |
| 28    | H22   | -8.606424E-03 | 8.096130E-03  | 6.687479E-03  |
| 29    | H23   | 4.313868E-03  | 6.735936E-03  | 1.097202E-02  |
| 30    | H27   | 4.774694E-03  | -7.749592E-03 | 1.317482E-03  |
| 31    | H29   | 5.586975E-03  | 5.473708E-03  | 9.484426E-03  |
| 32    | H30   | -5.564505E-03 | 2.273357E-02  | 8.181955E-03  |
| 33    | H15   | 4.091202E-03  | 4.153305E-03  | -7.287114E-03 |
| 34    | H2    | -8.387129E-03 | -9.390338E-03 | -2.799445E-04 |
| 35    | H5    | -1.168720E-02 | 2.602225E-03  | -1.186952E-02 |
| 36    | H8    | 7.414975E-03  | -3.622704E-03 | -5.516214E-03 |
| ----- |       |               |               |               |
|       | total | 2.244773E-04  | 4.946797E-04  | -1.154878E-03 |

end of program der1b

start of program geopt 1

geometry optimization step 1

reading input hessian of dimension 108

in five columns format

Level shifts adjusted to satisfy step-size constraints

Step size: 0.3000741

Cos(theta): 0.7984203

Final level shift: -5.8398525E-02

gradient maximum: 4.6520E-02 . ( 4.5000E-04 )

gradient rms: 1.1108E-02 . ( 3.0000E-04 )

step size: 0.30007 trust radius: 0.30000

displacement maximum: 1.1105E-01 . ( 1.8000E-03 )

S560

displacement rms: 2.7167E-02 . ( 1.2000E-03 )  
predicted energy change: -1.7327E-02 geom step: 3.0007E-  
01 full step: 3.0007E-01  
molecular structure not yet converged...

center of mass moved by:  
x: 1.6523E-02 y: 8.9915E-03 z: -2.5956E-02

new geometry:

|      | angstroms     |               |               |
|------|---------------|---------------|---------------|
| atom | x             | y             | z             |
| H1   | -0.1125544004 | 1.3490182705  | -2.0812065928 |
| C1   | -0.0822700274 | 1.7742139994  | -1.0960895655 |
| C2   | 0.0290323561  | 2.9020261661  | 1.3957088232  |
| C3   | 0.2557395309  | 0.9718435547  | -0.0179704405 |
| C4   | -0.3738000657 | 3.1170338190  | -0.9481893897 |
| C5   | -0.3294276373 | 3.6736671945  | 0.3057929409  |
| C6   | 0.3499836997  | 1.5588462521  | 1.2414057048  |
| C7   | 0.6122424529  | -0.4980057977 | -0.1556845847 |
| H3   | -0.6350433020 | 3.7104071981  | -1.8061834164 |
| H4   | -0.5694629196 | 4.7118682444  | 0.4490663105  |
| H6   | 0.0619705995  | 3.3609698431  | 2.3660311927  |
| H7   | 1.7034409118  | -0.5385367759 | -0.1989842631 |
| C10  | 0.1054851835  | -1.2098512322 | -1.3996296773 |
| C8   | 0.2078252075  | -1.2521636252 | 1.1329248539  |
| C17  | -1.3040113438 | -1.3954332180 | 1.3761425972  |
| N2   | 0.7568932496  | 0.7974509187  | 2.3693619131  |
| C9   | 0.8392743886  | -0.5812616526 | 2.3405009354  |
| C16  | 1.3562820162  | 1.4790377411  | 3.5226830965  |
| O1   | 1.3273195924  | -1.2228601031 | 3.2178176845  |
| C11  | -0.7761848500 | -2.6390271913 | -3.6419126009 |
| C12  | 0.9705567267  | -2.0335882352 | -2.1084272016 |
| C13  | -1.2128116490 | -1.1138195693 | -1.8367723249 |
| C14  | -1.6518122708 | -1.8195067100 | -2.9435818449 |
| C15  | 0.5393641985  | -2.7434115200 | -3.2201161282 |
| H19  | 1.9950673825  | -2.1306678967 | -1.7916213106 |
| H20  | -1.9066696388 | -0.4885860461 | -1.3064888263 |
| H21  | -2.6766917841 | -1.7336993858 | -3.2588816819 |
| H22  | 1.2280204278  | -3.3744941707 | -3.7559404525 |
| H23  | -1.1161528266 | -3.1883795484 | -4.5025636783 |
| H27  | -1.8132497488 | -0.4352163135 | 1.3515607326  |
| H29  | -1.7474827154 | -2.0330232700 | 0.6237774500  |
| H30  | 0.6389800842  | -2.2479882977 | 1.0994689308  |
| H15  | -1.4778959657 | -1.8495380113 | 2.3443816832  |
| H2   | 2.0206296056  | 2.2677146093  | 3.1671030759  |
| H5   | 1.8975484632  | 0.7522382677  | 4.1236662018  |
| H8   | 0.5750960993  | 1.9314319120  | 4.1373180039  |

nuclear repulsion energy..... 1398.698128140 hartrees

-----  
/ end of geometry optimization iteration 1 /  
-----

end of program geopt

start of program onee  
smallest eigenvalue of S: 3.273E-04  
number of canonical orbitals..... 368  
end of program onee

start of program probe  
end of program probe

start of program grid

number of gridpoints:

|     | atom     | H1  | C1  | C2  | C3  | C4  | C5  | C6  |
|-----|----------|-----|-----|-----|-----|-----|-----|-----|
| C7  |          |     |     |     |     |     |     |     |
|     | grid # 1 | 71  | 86  | 86  | 89  | 89  | 87  | 87  |
| 81  |          |     |     |     |     |     |     |     |
|     | grid # 2 | 115 | 96  | 95  | 99  | 97  | 97  | 98  |
| 89  |          |     |     |     |     |     |     |     |
|     | grid # 3 | 210 | 183 | 182 | 194 | 182 | 183 | 187 |
| 176 |          |     |     |     |     |     |     |     |
|     | grid # 4 | 208 | 327 | 327 | 339 | 325 | 327 | 329 |
| 312 |          |     |     |     |     |     |     |     |

number of gridpoints:

|     | atom     | H3  | H4  | H6  | H7  | C10 | C8  | C17 |
|-----|----------|-----|-----|-----|-----|-----|-----|-----|
| N2  |          |     |     |     |     |     |     |     |
|     | grid # 1 | 73  | 73  | 70  | 66  | 92  | 82  | 72  |
| 96  |          |     |     |     |     |     |     |     |
|     | grid # 2 | 118 | 118 | 113 | 106 | 100 | 92  | 79  |
| 105 |          |     |     |     |     |     |     |     |
|     | grid # 3 | 223 | 223 | 208 | 210 | 196 | 173 | 150 |
| 215 |          |     |     |     |     |     |     |     |
|     | grid # 4 | 223 | 223 | 208 | 205 | 340 | 317 | 288 |
| 394 |          |     |     |     |     |     |     |     |

number of gridpoints:

|     | atom     | C9  | C16 | O1  | C11 | C12 | C13 | C14 |
|-----|----------|-----|-----|-----|-----|-----|-----|-----|
| C15 |          |     |     |     |     |     |     |     |
|     | grid # 1 | 82  | 73  | 110 | 89  | 88  | 87  | 89  |
| 89  |          |     |     |     |     |     |     |     |
|     | grid # 2 | 92  | 80  | 122 | 97  | 95  | 95  | 95  |
| 97  |          |     |     |     |     |     |     |     |
|     | grid # 3 | 173 | 145 | 258 | 184 | 182 | 182 | 183 |
| 185 |          |     |     |     |     |     |     |     |
|     | grid # 4 | 293 | 274 | 455 | 328 | 326 | 325 | 326 |
| 327 |          |     |     |     |     |     |     |     |

| number of gridpoints: |          | H19 | H20 | H21 | H22 | H23 | H27 | H29 |
|-----------------------|----------|-----|-----|-----|-----|-----|-----|-----|
| H30                   | atom     |     |     |     |     |     |     |     |
| 69                    | grid # 1 | 72  | 69  | 73  | 73  | 73  | 72  | 71  |
| 109                   | grid # 2 | 113 | 111 | 118 | 118 | 118 | 109 | 109 |
| 215                   | grid # 3 | 214 | 209 | 223 | 222 | 224 | 214 | 210 |
| 208                   | grid # 4 | 213 | 205 | 223 | 224 | 224 | 211 | 206 |

| number of gridpoints: |      | H15 | H2  | H5  | H8  | total |
|-----------------------|------|-----|-----|-----|-----|-------|
| grid # 1              | atom | 71  | 72  | 71  | 71  | 2864  |
| grid # 2              | atom | 109 | 109 | 107 | 111 | 3731  |
| grid # 3              | atom | 219 | 216 | 214 | 216 | 7183  |
| grid # 4              | atom | 219 | 221 | 216 | 223 | 9939  |

end of program grid

start of program rwr  
end of program rwr

start of program scf

|      | i | u | d | i | g |                  | RMS     | maximum |
|------|---|---|---|---|---|------------------|---------|---------|
|      | t | p | i | c | r |                  | density | DIIS    |
|      | e | d | i | u | i | energy           | change  | error   |
|      | r | t | s | t | d | total energy     | change  |         |
| etot | 1 | N | N | 2 | U | -783.01451419036 |         | 6.7E-03 |
| etot | 2 | Y | Y | 6 | M | -783.02712585440 | 1.3E-02 | 1.9E-03 |
| etot | 3 | N | Y | 2 | U | -783.02832733897 | 1.2E-03 | 7.4E-04 |
| etot | 4 | Y | Y | 6 | M | -783.02848671427 | 1.6E-04 | 2.4E-04 |
| etot | 5 | Y | Y | 6 | M | -783.02851057783 | 2.4E-05 | 1.0E-04 |
| etot | 6 | Y | Y | 6 | M | -783.02851766483 | 7.1E-06 | 3.3E-05 |
| etot | 7 | Y | N | 6 | M | -783.02851948313 | 1.8E-06 | 0.0E+00 |

Energy components, in hartrees:

|     |                               |                   |       |
|-----|-------------------------------|-------------------|-------|
| (A) | Nuclear repulsion.....        | 1398.69812813984  |       |
| (E) | Total one-electron terms..... | -3841.80557777224 |       |
| (I) | Total two-electron terms..... | 1660.07893014927  |       |
| (L) | Electronic energy.....        | -2181.72664762297 | (E+I) |
| (N) | Total energy.....             | -783.02851948313  | (A+L) |

SCFE: SCF energy: HF -783.02851948313 hartrees iterations:

7

HOMO energy: -0.30278  
LUMO energy: 0.12996

Orbital energies:

|           |           |           |           |           |           |
|-----------|-----------|-----------|-----------|-----------|-----------|
| -20.52777 | -15.59956 | -11.34431 | -11.28540 | -11.25842 | -11.25141 |
| -11.24404 | -11.24241 | -11.24004 | -11.23570 | -11.23560 | -11.23541 |
| -11.23380 | -11.23370 | -11.23340 | -11.23278 | -11.23251 | -11.22661 |
| -11.21915 | -1.40009  | -1.26498  | -1.16861  | -1.15033  | -1.10686  |
| -1.03202  | -1.02122  | -1.01901  | -1.01524  | -0.95301  | -0.93941  |
| -0.85628  | -0.84624  | -0.83308  | -0.82885  | -0.79003  | -0.73952  |
| -0.71012  | -0.69676  | -0.67152  | -0.65989  | -0.64750  | -0.63561  |
| -0.63350  | -0.61560  | -0.61281  | -0.60180  | -0.59509  | -0.58652  |
| -0.57718  | -0.56623  | -0.55292  | -0.54857  | -0.52641  | -0.52087  |
| -0.51827  | -0.51106  | -0.50428  | -0.49248  | -0.48471  | -0.47541  |
| -0.46680  | -0.42072  | -0.40711  | -0.34138  | -0.33651  | -0.32665  |
| -0.30278  | 0.12996   | 0.13581   | 0.14032   | 0.15016   | 0.21038   |
| 0.23406   | 0.23945   | 0.25603   | 0.26331   | 0.26800   |           |

end of program scf

start of program derla  
end of program derla

start of program rwr  
end of program rwr

start of program derlb

forces (hartrees/bohr) : total

| atom | label | x             | y             | z             |
|------|-------|---------------|---------------|---------------|
| 1    | H1    | -2.843948E-04 | -1.768825E-03 | 3.816059E-04  |
| 2    | C1    | 4.013632E-04  | -2.107590E-03 | -3.990825E-03 |
| 3    | C2    | 1.880646E-03  | 2.399328E-03  | 4.206897E-03  |
| 4    | C3    | 2.260431E-05  | -1.542721E-03 | -6.428492E-03 |
| 5    | C4    | -8.246208E-04 | -3.075724E-05 | -5.869721E-03 |
| 6    | C5    | -1.408096E-04 | 4.495031E-03  | 5.329121E-03  |
| 7    | C6    | -4.100620E-03 | -1.476936E-03 | 1.073927E-02  |
| 8    | C7    | 1.675477E-03  | -1.597375E-03 | 1.942409E-03  |
| 9    | H3    | 9.079074E-05  | -1.735100E-04 | -4.749835E-05 |
| 10   | H4    | 2.878944E-06  | 5.060941E-04  | 6.681287E-04  |
| 11   | H6    | -8.561721E-05 | -1.196431E-03 | -2.860196E-04 |
| 12   | H7    | -2.072512E-03 | -1.106956E-03 | 5.557557E-04  |
| 13   | C10   | 1.254851E-03  | 4.882624E-04  | -1.063035E-03 |
| 14   | C8    | 1.329381E-03  | -9.391682E-04 | 2.572407E-04  |
| 15   | C17   | 7.257762E-05  | 2.118546E-03  | -9.601074E-04 |
| 16   | N2    | 1.176564E-02  | -5.294806E-03 | 2.330405E-03  |

S564



|       |       |               |               |               |
|-------|-------|---------------|---------------|---------------|
| 17    | C9    | -9.605992E-03 | 1.031359E-02  | -1.519911E-02 |
| 18    | C16   | -5.552208E-03 | 2.799024E-03  | -8.704006E-04 |
| 19    | O1    | 4.833917E-03  | -3.935250E-03 | 1.132899E-02  |
| 20    | C11   | 8.406961E-04  | 2.580410E-04  | 4.894653E-04  |
| 21    | C12   | 1.156232E-03  | -1.395091E-03 | -1.516834E-03 |
| 22    | C13   | -2.383016E-03 | -4.002380E-04 | -2.034229E-04 |
| 23    | C14   | 1.420427E-03  | -1.247136E-03 | -5.713953E-04 |
| 24    | C15   | -1.961764E-03 | -8.413992E-06 | -6.780641E-04 |
| 25    | H19   | 9.185237E-05  | 6.970024E-04  | 2.386755E-04  |
| 26    | H20   | 6.566934E-05  | 1.072920E-03  | -6.224180E-04 |
| 27    | H21   | -2.010110E-04 | 3.441211E-04  | -4.557045E-05 |
| 28    | H22   | -6.697296E-05 | 4.906855E-04  | 7.863280E-04  |
| 29    | H23   | 1.007612E-04  | 2.247392E-04  | 1.475222E-04  |
| 30    | H27   | 8.470764E-04  | -1.305380E-03 | 6.115242E-04  |
| 31    | H29   | -4.006935E-04 | -6.083159E-04 | 2.988882E-04  |
| 32    | H30   | -2.181455E-04 | 2.027391E-03  | 5.235741E-04  |
| 33    | H15   | 3.826738E-04  | -1.800988E-04 | 8.157158E-04  |
| 34    | H2    | -1.258469E-03 | -4.917652E-03 | 3.649656E-03  |
| 35    | H5    | -3.387698E-03 | 5.274773E-03  | -6.376292E-03 |
| 36    | H8    | 4.567347E-03  | -1.655723E-03 | -1.393586E-03 |
| ----- |       | -----         | -----         | -----         |
|       | total | 2.583143E-04  | 6.211741E-04  | -8.216112E-04 |

end of program derlb

start of program geopt 2

geometry optimization step 2

reading input hessian of dimension 108  
in five columns format

Level shifts adjusted to satisfy step-size constraints

Step size: 0.3001113  
Cos(theta): 0.3438790

Final level shift: -9.0558376E-03

energy change: -1.5420E-02 . ( 5.0000E-05 )  
gradient maximum: 1.2466E-02 . ( 4.5000E-04 )  
gradient rms: 2.8676E-03 . ( 3.0000E-04 )  
step size: 0.30007 trust radius: 0.30000  
displacement maximum: 1.5640E-01 . ( 1.8000E-03 )  
displacement rms: 2.7167E-02 . ( 1.2000E-03 )  
predicted energy change: -2.0421E-03 geom step: 3.0007E-  
01 full step: 3.0007E-01  
molecular structure not yet converged...

center of mass moved by:

x: 2.6876E-03 y: 3.5458E-03 z: -8.0629E-03

new geometry:

|      | angstroms     |               |               |
|------|---------------|---------------|---------------|
| atom | x             | y             | z             |
| H1   | -0.1836293277 | 1.3519229579  | -2.0807243168 |
| C1   | -0.1206287408 | 1.7799884914  | -1.0997595757 |
| C2   | 0.0724565960  | 2.9124184503  | 1.4091953925  |
| C3   | 0.2449834514  | 0.9763117560  | -0.0312145508 |
| C4   | -0.3998045224 | 3.1291402110  | -0.9335988731 |
| C5   | -0.3142312264 | 3.6881567674  | 0.3296428650  |
| C6   | 0.3776239045  | 1.5651664822  | 1.2377585711  |
| C7   | 0.5992583822  | -0.4991027587 | -0.1644418778 |
| H3   | -0.6832165432 | 3.7268328662  | -1.7801734059 |
| H4   | -0.5460070999 | 4.7253692496  | 0.4842957080  |
| H6   | 0.1373634472  | 3.3631548642  | 2.3779859680  |
| H7   | 1.6850756961  | -0.5457723000 | -0.2075348970 |
| C10  | 0.0977751432  | -1.2180272449 | -1.4102646955 |
| C8   | 0.2078461413  | -1.2431026764 | 1.1326974093  |
| C17  | -1.2989569217 | -1.3922420662 | 1.3980762894  |
| N2   | 0.8385400548  | 0.8010443436  | 2.3310507530  |
| C9   | 0.8404882641  | -0.5656353176 | 2.3318711499  |
| C16  | 1.3436032579  | 1.4752974698  | 3.5298564784  |
| O1   | 1.2698762047  | -1.2028956519 | 3.2540755479  |
| C11  | -0.7690094451 | -2.6649111817 | -3.6506620540 |
| C12  | 0.9684797306  | -2.0423325494 | -2.1109107537 |
| C13  | -1.2211959885 | -1.1295016146 | -1.8573155020 |
| C14  | -1.6495480710 | -1.8445789613 | -2.9634068997 |
| C15  | 0.5428175506  | -2.7617204618 | -3.2189637938 |
| H19  | 1.9909516735  | -2.1272437526 | -1.7900024676 |
| H20  | -1.9164275239 | -0.4933786817 | -1.3444592426 |
| H21  | -2.6702780501 | -1.7576435119 | -3.2884666289 |
| H22  | 1.2376876448  | -3.3918955944 | -3.7428222331 |
| H23  | -1.1004328414 | -3.2174686627 | -4.5104990417 |
| H27  | -1.8080847217 | -0.4357200124 | 1.4061211898  |
| H29  | -1.7576777852 | -2.0170911335 | 0.6466664807  |
| H30  | 0.6476887234  | -2.2291589587 | 1.1075661940  |
| H15  | -1.4469893645 | -1.8654584332 | 2.3615688531  |
| H2   | 2.0537110824  | 2.2425234021  | 3.2389809718  |
| H5   | 1.8322222987  | 0.7343175670  | 4.1543515305  |
| H8   | 0.5316980518  | 1.9343973670  | 4.1015280406  |

nuclear repulsion energy..... 1396.934055757 hartrees

-----  
/ end of geometry optimization iteration 2 /  
-----

end of program geopt

start of program onee

smallest eigenvalue of S: 3.403E-04

number of canonical orbitals..... 368

end of program onee

start of program probe  
end of program probe

start of program grid

number of gridpoints:

| atom     | H1  | C1  | C2  | C3  | C4  | C5  | C6  |
|----------|-----|-----|-----|-----|-----|-----|-----|
| C7       |     |     |     |     |     |     |     |
| grid # 1 | 71  | 87  | 89  | 88  | 89  | 89  | 87  |
| 82       |     |     |     |     |     |     |     |
| grid # 2 | 115 | 96  | 95  | 97  | 97  | 97  | 94  |
| 90       |     |     |     |     |     |     |     |
| grid # 3 | 210 | 184 | 183 | 192 | 182 | 184 | 191 |
| 175      |     |     |     |     |     |     |     |
| grid # 4 | 208 | 327 | 327 | 340 | 327 | 327 | 328 |
| 314      |     |     |     |     |     |     |     |

number of gridpoints:

| atom     | H3  | H4  | H6  | H7  | C10 | C8  | C17 |
|----------|-----|-----|-----|-----|-----|-----|-----|
| N2       |     |     |     |     |     |     |     |
| grid # 1 | 73  | 73  | 70  | 66  | 92  | 82  | 72  |
| 94       |     |     |     |     |     |     |     |
| grid # 2 | 118 | 118 | 110 | 105 | 100 | 90  | 80  |
| 104      |     |     |     |     |     |     |     |
| grid # 3 | 223 | 223 | 207 | 208 | 194 | 175 | 147 |
| 214      |     |     |     |     |     |     |     |
| grid # 4 | 224 | 223 | 206 | 207 | 339 | 314 | 286 |
| 393      |     |     |     |     |     |     |     |

number of gridpoints:

| atom     | C9  | C16 | O1  | C11 | C12 | C13 | C14 |
|----------|-----|-----|-----|-----|-----|-----|-----|
| C15      |     |     |     |     |     |     |     |
| grid # 1 | 81  | 72  | 110 | 89  | 88  | 87  | 89  |
| 89       |     |     |     |     |     |     |     |
| grid # 2 | 90  | 79  | 122 | 97  | 95  | 95  | 95  |
| 97       |     |     |     |     |     |     |     |
| grid # 3 | 175 | 145 | 259 | 184 | 182 | 183 | 183 |
| 184      |     |     |     |     |     |     |     |
| grid # 4 | 295 | 276 | 454 | 328 | 326 | 325 | 326 |
| 328      |     |     |     |     |     |     |     |

number of gridpoints:

| atom     | H19 | H20 | H21 | H22 | H23 | H27 | H29 |
|----------|-----|-----|-----|-----|-----|-----|-----|
| H30      |     |     |     |     |     |     |     |
| grid # 1 | 72  | 69  | 73  | 73  | 73  | 72  | 71  |
| 69       |     |     |     |     |     |     |     |
| grid # 2 | 113 | 112 | 118 | 118 | 118 | 109 | 109 |
| 108      |     |     |     |     |     |     |     |

```

grid # 3      214      209      223      223      224      215      210
215
grid # 4      213      205      223      223      224      212      207
208

```

number of gridpoints:

| atom     | H15 | H2  | H5  | H8  | total |
|----------|-----|-----|-----|-----|-------|
| grid # 1 | 71  | 71  | 70  | 71  | 2864  |
| grid # 2 | 109 | 111 | 107 | 111 | 3719  |
| grid # 3 | 219 | 217 | 212 | 215 | 7183  |
| grid # 4 | 219 | 215 | 212 | 221 | 9930  |

end of program grid

start of program rwr  
end of program rwr

start of program scf

|      | i | u | d | i | g |                  | energy  | RMS     | maximum |
|------|---|---|---|---|---|------------------|---------|---------|---------|
|      | t | p | i | c | r |                  | change  | density | DIIS    |
|      | e | d | i | u | i | total energy     |         | change  | error   |
|      | r | t | s | t | d |                  |         |         |         |
| etot | 1 | N | N | 2 | U | -783.01935918201 |         | 2.6E-04 | 5.9E-03 |
| etot | 2 | Y | Y | 6 | M | -783.02884355997 | 9.5E-03 | 1.0E-04 | 1.6E-03 |
| etot | 3 | N | Y | 2 | U | -783.02989698669 | 1.1E-03 | 2.6E-05 | 5.0E-04 |
| etot | 4 | Y | Y | 6 | M | -783.02996542314 | 6.8E-05 | 1.4E-05 | 2.5E-04 |
| etot | 5 | Y | Y | 6 | M | -783.02998857111 | 2.3E-05 | 4.7E-06 | 7.9E-05 |
| etot | 6 | Y | N | 6 | M | -783.02999082193 | 2.3E-06 | 0.0E+00 | 0.0E+00 |

Energy components, in hartrees:

|     |                               |                   |       |
|-----|-------------------------------|-------------------|-------|
| (A) | Nuclear repulsion.....        | 1396.93405575700  |       |
| (E) | Total one-electron terms..... | -3838.25424096586 |       |
| (I) | Total two-electron terms..... | 1658.29019438693  |       |
| (L) | Electronic energy.....        | -2179.96404657893 | (E+I) |
| (N) | Total energy.....             | -783.02999082193  | (A+L) |

SCFE: SCF energy: HF -783.02999082193 hartrees iterations:  
6

HOMO energy: -0.29991  
LUMO energy: 0.12972

Orbital energies:

|           |           |           |           |           |           |
|-----------|-----------|-----------|-----------|-----------|-----------|
| -20.52396 | -15.60189 | -11.34361 | -11.28668 | -11.25802 | -11.25153 |
| -11.24498 | -11.24397 | -11.24017 | -11.23733 | -11.23574 | -11.23537 |
| -11.23516 | -11.23383 | -11.23342 | -11.23318 | -11.23305 | -11.22839 |

|           |          |          |          |          |          |
|-----------|----------|----------|----------|----------|----------|
| -11.21890 | -1.39515 | -1.26855 | -1.16797 | -1.14815 | -1.10719 |
| -1.03264  | -1.02097 | -1.01791 | -1.01544 | -0.95661 | -0.94006 |
| -0.85723  | -0.84868 | -0.83206 | -0.82960 | -0.78977 | -0.74186 |
| -0.71094  | -0.69797 | -0.67012 | -0.66105 | -0.64769 | -0.63574 |
| -0.63363  | -0.61724 | -0.61040 | -0.60126 | -0.59924 | -0.58698 |
| -0.57754  | -0.56649 | -0.55205 | -0.54564 | -0.52533 | -0.52101 |
| -0.51845  | -0.51172 | -0.50437 | -0.49294 | -0.48321 | -0.47599 |
| -0.46687  | -0.42037 | -0.40796 | -0.34120 | -0.33698 | -0.32766 |
| -0.29991  | 0.12972  | 0.13421  | 0.14014  | 0.14901  | 0.20871  |
| 0.23397   | 0.24087  | 0.25635  | 0.26356  | 0.26841  |          |

end of program scf

start of program derla  
end of program derla

start of program rwr  
end of program rwr

start of program derlb

forces (hartrees/bohr) : total

| atom | label | x             | y             | z             |
|------|-------|---------------|---------------|---------------|
| 1    | H1    | -3.342399E-04 | -1.014829E-03 | -7.603331E-04 |
| 2    | C1    | -3.554893E-05 | 1.550356E-03  | 2.000718E-03  |
| 3    | C2    | 1.342205E-03  | -2.276416E-03 | -1.346762E-03 |
| 4    | C3    | 9.942566E-04  | 8.629607E-04  | 1.777452E-03  |
| 5    | C4    | 3.221399E-04  | 5.615743E-04  | 3.277667E-03  |
| 6    | C5    | -4.590701E-04 | -2.763821E-03 | -4.068788E-03 |
| 7    | C6    | -2.934787E-03 | 1.491936E-05  | -2.581718E-03 |
| 8    | C7    | -1.269782E-03 | 7.307403E-04  | 2.603704E-04  |
| 9    | H3    | -1.382797E-04 | 4.871283E-04  | -4.343152E-04 |
| 10   | H4    | -8.671782E-05 | 1.362296E-03  | -9.159273E-05 |
| 11   | H6    | 2.243184E-04  | 4.664835E-04  | 1.131961E-03  |
| 12   | H7    | 1.469781E-03  | 1.023994E-04  | 1.312987E-04  |
| 13   | C10   | -2.164766E-03 | 1.055046E-03  | 1.007445E-04  |
| 14   | C8    | 4.195795E-04  | 1.427879E-03  | -7.921187E-04 |
| 15   | C17   | 1.687143E-03  | -2.257025E-04 | 9.402869E-04  |
| 16   | N2    | 3.733391E-03  | 4.098949E-03  | 7.163126E-03  |
| 17   | C9    | -2.385924E-03 | -2.637518E-03 | 4.484965E-06  |
| 18   | C16   | -1.635327E-03 | -1.574502E-03 | 1.394982E-03  |
| 19   | O1    | -4.677502E-04 | -1.514818E-03 | -8.131952E-04 |
| 20   | C11   | 1.805062E-03  | 7.263183E-05  | 1.023001E-03  |
| 21   | C12   | -7.642356E-04 | -8.609758E-04 | -1.401140E-03 |
| 22   | C13   | 1.158993E-03  | -7.530626E-04 | -5.490111E-04 |
| 23   | C14   | 6.666767E-04  | 1.023733E-03  | 1.133059E-03  |
| 24   | C15   | -7.713480E-04 | 7.480252E-04  | 3.591316E-04  |

|       |     |               |               |               |
|-------|-----|---------------|---------------|---------------|
| 25    | H19 | 1.328721E-03  | -1.045286E-04 | 3.009214E-04  |
| 26    | H20 | -8.443342E-04 | 8.660801E-04  | 5.384705E-04  |
| 27    | H21 | -9.734845E-04 | 1.348959E-04  | -2.145368E-04 |
| 28    | H22 | 8.408569E-04  | -6.496193E-04 | -5.159386E-04 |
| 29    | H23 | -2.626022E-04 | -5.628363E-04 | -7.194628E-04 |
| 30    | H27 | -2.776281E-04 | 1.029185E-03  | -4.749714E-05 |
| 31    | H29 | -7.231794E-04 | -1.049745E-03 | -1.120228E-03 |
| 32    | H30 | 2.920974E-04  | -2.241580E-03 | -2.674646E-04 |
| 33    | H15 | -6.786133E-05 | -8.287318E-05 | 6.334442E-04  |
| 34    | H2  | -9.501029E-04 | -6.509092E-04 | 1.396432E-03  |
| 35    | H5  | -2.900340E-03 | 5.028536E-03  | -4.808414E-03 |
| 36    | H8  | 4.273847E-03  | -2.722879E-03 | -3.769961E-03 |
| ----- |     | -----         | -----         | -----         |
| total |     | 1.117595E-04  | -6.279553E-05 | -7.349253E-04 |

end of program derlb

start of program geopt 3

geometry optimization step 3

reading input hessian of dimension 108  
in five columns format  
reading input hessian of dimension 108  
in five columns format

energy change: -1.4713E-03 . ( 5.0000E-05 )  
gradient maximum: 7.5031E-03 . ( 4.5000E-04 )  
gradient rms: 1.6310E-03 . ( 3.0000E-04 )  
step size: 0.23051 trust radius: 0.30000  
displacement maximum: 1.5798E-01 . ( 1.8000E-03 )  
displacement rms: 2.0870E-02 . ( 1.2000E-03 )  
predicted energy change: -8.1419E-04 geom step: 2.3051E-01  
01 full step: 2.3051E-01  
molecular structure not yet converged...

center of mass moved by:

x: -2.2100E-02 y: -1.8397E-03 z: 1.2163E-02

new geometry:

|      |               | angstroms     |               |  |
|------|---------------|---------------|---------------|--|
| atom | x             | y             | z             |  |
| H1   | -0.2459569282 | 1.3373998127  | -2.0654368470 |  |
| C1   | -0.1576603769 | 1.7760798243  | -1.0886164867 |  |
| C2   | 0.0930773543  | 2.9162127566  | 1.4136375488  |  |
| C3   | 0.2218854675  | 0.9746865882  | -0.0226047786 |  |
| C4   | -0.4206418575 | 3.1295424371  | -0.9230052816 |  |
| C5   | -0.3038432997 | 3.6935491719  | 0.3365743181  |  |
| C6   | 0.3712262324  | 1.5643156865  | 1.2443804944  |  |
| C7   | 0.5736033689  | -0.5016475288 | -0.1489946594 |  |
| H3   | -0.7131901046 | 3.7273364480  | -1.7677832653 |  |

S570

|     |               |               |               |
|-----|---------------|---------------|---------------|
| H4  | -0.5176610514 | 4.7356371035  | 0.4914181882  |
| H6  | 0.1815298805  | 3.3658635066  | 2.3812966787  |
| H7  | 1.6608838932  | -0.5540158107 | -0.1673371050 |
| C10 | 0.1004323297  | -1.2182582990 | -1.4085871897 |
| C8  | 0.1606163308  | -1.2402501129 | 1.1425560300  |
| C17 | -1.3463753081 | -1.3705266738 | 1.4040705491  |
| N2  | 0.8249892683  | 0.8038003707  | 2.3434555912  |
| C9  | 0.7903834594  | -0.5686604200 | 2.3441459612  |
| C16 | 1.4476987723  | 1.4632014169  | 3.4572474847  |
| O1  | 1.1744507790  | -1.2161939329 | 3.2883205113  |
| C11 | -0.6952726953 | -2.6654347310 | -3.6702314646 |
| C12 | 1.0006558772  | -2.0241090874 | -2.1007402109 |
| C13 | -1.2118547816 | -1.1464657357 | -1.8775304313 |
| C14 | -1.6034863976 | -1.8614435296 | -2.9953619444 |
| C15 | 0.6090385137  | -2.7438072462 | -3.2184927835 |
| H19 | 2.0203575559  | -2.0880813071 | -1.7610949610 |
| H20 | -1.9255705755 | -0.5172162409 | -1.3789160329 |
| H21 | -2.6191191736 | -1.7871445324 | -3.3430243705 |
| H22 | 1.3260066680  | -3.3584191707 | -3.7320600460 |
| H23 | -1.0028167557 | -3.2181019287 | -4.5402522864 |
| H27 | -1.8427797435 | -0.4082123451 | 1.4016509204  |
| H29 | -1.8121279735 | -2.0003114425 | 0.6599411823  |
| H30 | 0.5882473945  | -2.2330182017 | 1.1222453379  |
| H15 | -1.4999068173 | -1.8287604125 | 2.3730252419  |
| H2  | 2.0883760050  | 2.2563192096  | 3.1296676109  |
| H5  | 2.0248930090  | 0.7288058451  | 3.9663158922  |
| H8  | 0.7149526944  | 1.8735365570  | 4.1264887358  |

nuclear repulsion energy..... 1397.214819407 hartrees

-----  
 / end of geometry optimization iteration 3 /  
 -----

end of program geopt

start of program onee

smallest eigenvalue of S: 3.417E-04

number of canonical orbitals..... 368

end of program onee

start of program probe

end of program probe

start of program grid

number of gridpoints:

|    | atom | H1 | C1 | C2 | C3 | C4 | C5 | C6 |
|----|------|----|----|----|----|----|----|----|
| C7 |      |    |    |    |    |    |    |    |

|     |          |     |     |     |     |     |     |     |
|-----|----------|-----|-----|-----|-----|-----|-----|-----|
| 82  | grid # 1 | 71  | 88  | 88  | 88  | 89  | 89  | 85  |
| 90  | grid # 2 | 115 | 96  | 95  | 97  | 97  | 97  | 93  |
| 175 | grid # 3 | 210 | 184 | 183 | 192 | 183 | 184 | 189 |
| 314 | grid # 4 | 209 | 327 | 326 | 340 | 327 | 327 | 326 |

number of gridpoints:

|     |          |     |     |     |     |     |     |     |
|-----|----------|-----|-----|-----|-----|-----|-----|-----|
| N2  | atom     | H3  | H4  | H6  | H7  | C10 | C8  | C17 |
| 96  | grid # 1 | 73  | 73  | 70  | 68  | 92  | 82  | 74  |
| 106 | grid # 2 | 118 | 118 | 113 | 107 | 100 | 90  | 80  |
| 211 | grid # 3 | 223 | 223 | 208 | 209 | 197 | 175 | 151 |
| 391 | grid # 4 | 224 | 223 | 207 | 206 | 341 | 314 | 286 |

number of gridpoints:

|     |          |     |     |     |     |     |     |     |
|-----|----------|-----|-----|-----|-----|-----|-----|-----|
| C15 | atom     | C9  | C16 | O1  | C11 | C12 | C13 | C14 |
| 89  | grid # 1 | 82  | 69  | 111 | 89  | 88  | 87  | 89  |
| 97  | grid # 2 | 90  | 76  | 122 | 97  | 95  | 95  | 95  |
| 184 | grid # 3 | 175 | 139 | 259 | 184 | 183 | 183 | 183 |
| 328 | grid # 4 | 296 | 270 | 453 | 328 | 326 | 325 | 326 |

number of gridpoints:

|     |          |     |     |     |     |     |     |     |
|-----|----------|-----|-----|-----|-----|-----|-----|-----|
| H30 | atom     | H19 | H20 | H21 | H22 | H23 | H27 | H29 |
| 69  | grid # 1 | 72  | 69  | 73  | 73  | 73  | 72  | 71  |
| 108 | grid # 2 | 112 | 112 | 118 | 118 | 118 | 109 | 108 |
| 215 | grid # 3 | 214 | 209 | 223 | 223 | 224 | 215 | 210 |
| 208 | grid # 4 | 213 | 206 | 223 | 223 | 224 | 210 | 207 |

number of gridpoints:

|  |          |     |     |     |     |       |
|--|----------|-----|-----|-----|-----|-------|
|  | atom     | H15 | H2  | H5  | H8  | total |
|  | grid # 1 | 71  | 71  | 70  | 71  | 2867  |
|  | grid # 2 | 110 | 111 | 107 | 111 | 3721  |
|  | grid # 3 | 219 | 216 | 212 | 216 | 7183  |
|  | grid # 4 | 217 | 213 | 208 | 213 | 9905  |



end of program grid

start of program rwr

end of program rwr

start of program scf

|      | i | u | d | i | g |                  | RMS     | maximum |
|------|---|---|---|---|---|------------------|---------|---------|
|      | t | p | i | c | r |                  | density | DIIS    |
|      | e | d | i | u | i | energy           | change  | error   |
|      | r | t | s | t | d | total energy     |         |         |
| etot | 1 | N | N | 2 | U | -783.01774798020 |         | 6.3E-03 |
| etot | 2 | Y | Y | 6 | M | -783.02795381847 | 1.0E-02 | 2.0E-03 |
| etot | 3 | N | Y | 2 | U | -783.02906619843 | 1.1E-03 | 5.5E-04 |
| etot | 4 | Y | Y | 6 | M | -783.02911839587 | 5.2E-05 | 1.6E-04 |
| etot | 5 | Y | Y | 6 | M | -783.02913119772 | 1.3E-05 | 9.5E-05 |
| etot | 6 | Y | N | 6 | M | -783.02913170307 | 5.1E-07 | 0.0E+00 |

Energy components, in hartrees:

|     |                               |                   |       |
|-----|-------------------------------|-------------------|-------|
| (A) | Nuclear repulsion.....        | 1397.21481940656  |       |
| (E) | Total one-electron terms..... | -3838.74482649495 |       |
| (I) | Total two-electron terms..... | 1658.50087538533  |       |
| (L) | Electronic energy.....        | -2180.24395110962 | (E+I) |
| (N) | Total energy.....             | -783.02913170307  | (A+L) |

SCFE: SCF energy: HF -783.02913170307 hartrees iterations:  
6

HOMO energy: -0.30091  
LUMO energy: 0.12932

Orbital energies:

|           |           |           |           |           |           |
|-----------|-----------|-----------|-----------|-----------|-----------|
| -20.52465 | -15.60127 | -11.34517 | -11.28601 | -11.25202 | -11.24901 |
| -11.24587 | -11.24468 | -11.24094 | -11.23826 | -11.23643 | -11.23601 |
| -11.23577 | -11.23446 | -11.23408 | -11.23372 | -11.23367 | -11.22961 |
| -11.21873 | -1.39152  | -1.27182  | -1.16864  | -1.14890  | -1.10837  |
| -1.03348  | -1.02095  | -1.01967  | -1.01628  | -0.96075  | -0.94061  |
| -0.85782  | -0.84875  | -0.83277  | -0.82964  | -0.79034  | -0.74252  |
| -0.71262  | -0.69888  | -0.66988  | -0.66285  | -0.64925  | -0.63697  |
| -0.63429  | -0.61803  | -0.61098  | -0.60322  | -0.60106  | -0.58784  |
| -0.57860  | -0.56702  | -0.55216  | -0.54948  | -0.52369  | -0.52081  |
| -0.51929  | -0.51135  | -0.50435  | -0.49314  | -0.48322  | -0.47602  |
| -0.46762  | -0.41888  | -0.40883  | -0.34156  | -0.33708  | -0.32845  |
| -0.30091  | 0.12932   | 0.13397   | 0.13944   | 0.14833   | 0.20533   |
| 0.23283   | 0.24136   | 0.25556   | 0.26560   | 0.26836   |           |

end of program scf

start of program derla  
end of program derla

start of program rwr  
end of program rwr

start of program der1b

forces (hartrees/bohr) : total

| atom | label | x             | y             | z             |
|------|-------|---------------|---------------|---------------|
| 1    | H1    | 2.627423E-04  | 6.305812E-04  | 5.646277E-04  |
| 2    | C1    | 1.118506E-05  | 3.926511E-04  | 1.481017E-03  |
| 3    | C2    | -4.614730E-04 | -1.360367E-03 | -2.751770E-03 |
| 4    | C3    | 7.862357E-04  | 6.561085E-04  | 2.558749E-03  |
| 5    | C4    | 3.702546E-04  | 5.981397E-04  | 3.487374E-03  |
| 6    | C5    | 2.009519E-04  | -2.962023E-03 | -3.491589E-03 |
| 7    | C6    | -2.625994E-03 | 1.514516E-03  | -4.109026E-03 |
| 8    | C7    | -1.163766E-03 | 5.306357E-04  | -1.363995E-03 |
| 9    | H3    | -6.107692E-05 | 3.009575E-05  | 2.795856E-04  |
| 10   | H4    | 1.128423E-06  | 6.032104E-04  | -3.521819E-04 |
| 11   | H6    | -2.404901E-04 | 8.945658E-04  | 1.255257E-03  |
| 12   | H7    | 7.830107E-04  | 8.331785E-04  | -2.344522E-04 |
| 13   | C10   | 6.452154E-04  | -6.333813E-04 | 3.728082E-04  |
| 14   | C8    | 4.548201E-04  | 1.164040E-03  | -9.650199E-04 |
| 15   | C17   | 4.735298E-04  | -7.346267E-04 | 1.245593E-04  |
| 16   | N2    | 5.432662E-04  | -9.227437E-03 | -1.710225E-02 |
| 17   | C9    | -9.229553E-04 | -4.058971E-03 | 1.398708E-02  |
| 18   | C16   | -6.972383E-04 | 3.880341E-04  | 5.499905E-03  |
| 19   | O1    | -1.780236E-03 | 7.098019E-03  | -1.119158E-02 |
| 20   | C11   | -1.568856E-03 | 4.805379E-04  | -5.217755E-05 |
| 21   | C12   | -1.272879E-03 | 2.088187E-03  | 2.326503E-03  |
| 22   | C13   | 2.230752E-03  | 2.352494E-04  | 2.955855E-04  |
| 23   | C14   | -8.304591E-05 | -6.579453E-04 | -1.323174E-03 |
| 24   | C15   | 3.931765E-04  | 1.577437E-04  | 1.823725E-04  |
| 25   | H19   | 5.157714E-05  | -2.913309E-04 | -8.786961E-05 |
| 26   | H20   | -3.140829E-04 | -2.290893E-04 | 4.600263E-04  |
| 27   | H21   | -6.117807E-05 | -1.827979E-04 | -4.161668E-05 |
| 28   | H22   | 2.743296E-04  | -4.847503E-04 | -5.998476E-04 |
| 29   | H23   | -1.768870E-04 | -1.024634E-04 | -1.684879E-05 |
| 30   | H27   | -7.941422E-04 | 1.417362E-03  | -3.267716E-04 |
| 31   | H29   | -5.084514E-04 | -5.879024E-04 | -1.075489E-03 |
| 32   | H30   | 2.942670E-04  | -1.347167E-03 | 5.685689E-05  |
| 33   | H15   | -2.382979E-04 | -4.975423E-04 | 9.190023E-04  |
| 34   | H2    | 5.109080E-03  | 5.721265E-03  | -5.423007E-03 |
| 35   | H5    | 5.252299E-03  | -4.505101E-03 | 8.683373E-03  |
| 36   | H8    | -4.938977E-03 | 2.539189E-03  | 7.181697E-03  |



|     |               |               |               |
|-----|---------------|---------------|---------------|
| C12 | 0.9798828225  | -2.0271824754 | -2.1062658564 |
| C13 | -1.2222518806 | -1.1383956356 | -1.8605009060 |
| C14 | -1.6340207402 | -1.8528618803 | -2.9707361376 |
| C15 | 0.5718499227  | -2.7471692180 | -3.2176692258 |
| H19 | 2.0033759919  | -2.0996586765 | -1.7782345208 |
| H20 | -1.9280510027 | -0.5098897923 | -1.3497012977 |
| H21 | -2.6545372084 | -1.7775907272 | -3.3030911777 |
| H22 | 1.2779339660  | -3.3688575097 | -3.7398455445 |
| H23 | -1.0604366769 | -3.2188373218 | -4.5169112486 |
| H27 | -1.8244582485 | -0.4159884213 | 1.4086644039  |
| H29 | -1.7902746586 | -2.0032003878 | 0.6557662839  |
| H30 | 0.6115222371  | -2.2378721009 | 1.1088521860  |
| H15 | -1.4746684235 | -1.8438661068 | 2.3715021479  |
| H2  | 2.0877143373  | 2.2365658426  | 3.2382978931  |
| H5  | 1.8463455099  | 0.7332576469  | 4.1302834590  |
| H8  | 0.5670645365  | 1.9153701228  | 4.0720034372  |

nuclear repulsion energy..... 1397.566331693 hartrees

-----  
/ end of geometry optimization iteration 4 /  
-----

end of program geopt

start of program onee  
smallest eigenvalue of S: 3.327E-04  
number of canonical orbitals..... 368  
end of program onee

start of program probe  
end of program probe

start of program grid

number of gridpoints:

|          | atom | H1  | C1  | C2  | C3  | C4  | C5  | C6  |
|----------|------|-----|-----|-----|-----|-----|-----|-----|
| C7       |      |     |     |     |     |     |     |     |
| grid # 1 |      | 71  | 87  | 89  | 88  | 89  | 87  | 85  |
| 81       |      |     |     |     |     |     |     |     |
| grid # 2 |      | 115 | 96  | 95  | 98  | 97  | 97  | 95  |
| 90       |      |     |     |     |     |     |     |     |
| grid # 3 |      | 210 | 184 | 183 | 192 | 182 | 183 | 193 |
| 176      |      |     |     |     |     |     |     |     |
| grid # 4 |      | 208 | 327 | 326 | 336 | 327 | 327 | 329 |
| 311      |      |     |     |     |     |     |     |     |

number of gridpoints:

|    | atom | H3 | H4 | H6 | H7 | C10 | C8 | C17 |
|----|------|----|----|----|----|-----|----|-----|
| N2 |      |    |    |    |    |     |    |     |

|     |          |     |     |     |     |     |     |     |
|-----|----------|-----|-----|-----|-----|-----|-----|-----|
| 95  | grid # 1 | 73  | 73  | 70  | 66  | 92  | 81  | 73  |
| 104 | grid # 2 | 118 | 118 | 111 | 107 | 100 | 90  | 80  |
| 216 | grid # 3 | 223 | 223 | 207 | 207 | 197 | 175 | 148 |
| 391 | grid # 4 | 224 | 223 | 207 | 206 | 341 | 315 | 288 |

number of gridpoints:

|     |          |     |     |     |     |     |     |     |
|-----|----------|-----|-----|-----|-----|-----|-----|-----|
| C15 | atom     | C9  | C16 | O1  | C11 | C12 | C13 | C14 |
| 89  | grid # 1 | 81  | 69  | 110 | 89  | 88  | 87  | 89  |
| 97  | grid # 2 | 91  | 78  | 122 | 97  | 95  | 95  | 95  |
| 184 | grid # 3 | 175 | 144 | 259 | 184 | 183 | 183 | 183 |
| 328 | grid # 4 | 295 | 274 | 454 | 328 | 326 | 325 | 326 |

number of gridpoints:

|     |          |     |     |     |     |     |     |     |
|-----|----------|-----|-----|-----|-----|-----|-----|-----|
| H30 | atom     | H19 | H20 | H21 | H22 | H23 | H27 | H29 |
| 69  | grid # 1 | 72  | 69  | 73  | 73  | 73  | 72  | 71  |
| 109 | grid # 2 | 113 | 112 | 118 | 118 | 118 | 109 | 109 |
| 215 | grid # 3 | 214 | 209 | 223 | 223 | 224 | 215 | 210 |
| 208 | grid # 4 | 213 | 205 | 223 | 224 | 224 | 212 | 207 |

number of gridpoints:

|  |          |     |     |     |     |       |
|--|----------|-----|-----|-----|-----|-------|
|  | atom     | H15 | H2  | H5  | H8  | total |
|  | grid # 1 | 71  | 71  | 70  | 71  | 2857  |
|  | grid # 2 | 110 | 111 | 106 | 109 | 3723  |
|  | grid # 3 | 219 | 217 | 214 | 216 | 7193  |
|  | grid # 4 | 217 | 217 | 209 | 214 | 9915  |

end of program grid

start of program rwr

end of program rwr

start of program scf

i u d i g  
t p i c r  
e d i u i

energy RMS maximum  
density DIIS

|      | r | t | s | t | d | total energy     | change  | change  | error   |
|------|---|---|---|---|---|------------------|---------|---------|---------|
| etot | 1 | N | N | 2 | U | -783.02007187364 |         | 2.4E-04 | 8.3E-03 |
| etot | 2 | Y | Y | 6 | M | -783.02927950792 | 9.2E-03 | 1.0E-04 | 2.3E-03 |
| etot | 3 | N | Y | 2 | U | -783.03020522889 | 9.3E-04 | 2.8E-05 | 6.4E-04 |
| etot | 4 | Y | Y | 6 | M | -783.03027940899 | 7.4E-05 | 1.2E-05 | 2.4E-04 |
| etot | 5 | Y | Y | 6 | M | -783.03028503421 | 5.6E-06 | 3.6E-06 | 6.0E-05 |
| etot | 6 | Y | N | 6 | M | -783.03028606742 | 1.0E-06 | 0.0E+00 | 0.0E+00 |

Energy components, in hartrees:

|     |                               |                   |       |
|-----|-------------------------------|-------------------|-------|
| (A) | Nuclear repulsion.....        | 1397.56633169276  |       |
| (E) | Total one-electron terms..... | -3839.49004995798 |       |
| (I) | Total two-electron terms..... | 1658.89343219781  |       |
| (L) | Electronic energy.....        | -2180.59661776018 | (E+I) |
| (N) | Total energy.....             | -783.03028606742  | (A+L) |

SCFE: SCF energy: HF -783.03028606742 hartrees iterations:  
6

HOMO energy: -0.30151  
LUMO energy: 0.13004

Orbital energies:

|           |           |           |           |           |           |
|-----------|-----------|-----------|-----------|-----------|-----------|
| -20.52575 | -15.60168 | -11.34527 | -11.28578 | -11.25374 | -11.25134 |
| -11.24485 | -11.24311 | -11.24072 | -11.23682 | -11.23589 | -11.23533 |
| -11.23467 | -11.23393 | -11.23344 | -11.23321 | -11.23315 | -11.22772 |
| -11.21944 | -1.39556  | -1.26862  | -1.16869  | -1.14964  | -1.10760  |
| -1.03274  | -1.02124  | -1.01978  | -1.01557  | -0.95796  | -0.93998  |
| -0.85744  | -0.84726  | -0.83281  | -0.82920  | -0.79009  | -0.74164  |
| -0.71168  | -0.69813  | -0.67055  | -0.66154  | -0.64823  | -0.63530  |
| -0.63411  | -0.61700  | -0.61161  | -0.60171  | -0.60086  | -0.58738  |
| -0.57727  | -0.56668  | -0.55279  | -0.54683  | -0.52597  | -0.52176  |
| -0.51768  | -0.51233  | -0.50448  | -0.49273  | -0.48307  | -0.47689  |
| -0.46662  | -0.42061  | -0.40878  | -0.34108  | -0.33690  | -0.32782  |
| -0.30151  | 0.13004   | 0.13527   | 0.14014   | 0.14944   | 0.20701   |
| 0.23354   | 0.24134   | 0.25619   | 0.26452   | 0.26825   |           |

end of program scf

start of program derla  
end of program derla

start of program rwr  
end of program rwr

start of program der1b

forces (hartrees/bohr) : total

| atom  | label | x             | y             | z             |
|-------|-------|---------------|---------------|---------------|
| 1     | H1    | 1.646466E-04  | 1.880849E-04  | 1.194528E-03  |
| 2     | C1    | -1.143771E-05 | -2.716188E-03 | -2.233249E-03 |
| 3     | C2    | 7.541546E-05  | 1.416283E-03  | 2.505989E-03  |
| 4     | C3    | -4.253961E-04 | -4.308706E-04 | -2.827206E-03 |
| 5     | C4    | -4.375653E-04 | 8.236331E-05  | -1.517397E-03 |
| 6     | C5    | 1.826236E-04  | 1.468845E-03  | 2.225074E-03  |
| 7     | C6    | 1.890309E-03  | 2.713480E-04  | 2.595240E-03  |
| 8     | C7    | 2.602789E-04  | -4.812970E-04 | 6.468153E-06  |
| 9     | H3    | 5.713597E-05  | -9.141122E-05 | 3.303538E-04  |
| 10    | H4    | 7.054680E-05  | 6.935440E-05  | 6.101354E-05  |
| 11    | H6    | -6.158785E-05 | -3.065612E-04 | -1.217761E-03 |
| 12    | H7    | -5.129256E-04 | 1.551967E-04  | 2.122968E-04  |
| 13    | C10   | 6.175495E-04  | 1.191041E-04  | 2.124329E-04  |
| 14    | C8    | -5.224880E-04 | -4.036044E-04 | 1.057044E-04  |
| 15    | C17   | 2.647212E-04  | 8.432808E-04  | -1.035454E-03 |
| 16    | N2    | -2.998698E-03 | -5.940236E-03 | 1.516803E-03  |
| 17    | C9    | 2.501823E-03  | 2.303579E-03  | -3.416043E-03 |
| 18    | C16   | 1.289114E-03  | 5.198916E-03  | -6.440152E-03 |
| 19    | O1    | -1.440233E-03 | 2.127304E-03  | 8.438183E-04  |
| 20    | C11   | -5.806567E-04 | -3.024552E-04 | -6.988772E-04 |
| 21    | C12   | 8.317287E-04  | 6.708537E-04  | 1.155040E-03  |
| 22    | C13   | 1.898071E-04  | 6.083157E-04  | 8.280867E-04  |
| 23    | C14   | 1.022979E-04  | -1.030023E-03 | -1.085521E-03 |
| 24    | C15   | -5.602844E-04 | -4.244240E-04 | -7.314447E-04 |
| 25    | H19   | -2.818396E-04 | 5.122420E-05  | -7.639044E-05 |
| 26    | H20   | -1.349307E-04 | 1.139769E-04  | 1.266286E-04  |
| 27    | H21   | -1.031447E-04 | 3.878404E-05  | -8.689889E-05 |
| 28    | H22   | -4.282440E-05 | 3.212363E-05  | -3.567128E-05 |
| 29    | H23   | 2.665011E-05  | 1.359576E-04  | 9.593062E-05  |
| 30    | H27   | 8.621960E-05  | -9.910492E-06 | -7.450652E-05 |
| 31    | H29   | -3.025603E-04 | -4.870089E-04 | -2.476128E-04 |
| 32    | H30   | -6.554063E-05 | 5.796551E-04  | -3.542383E-05 |
| 33    | H15   | -3.036731E-05 | -4.704390E-04 | 7.311849E-04  |
| 34    | H2    | -8.466337E-04 | -1.158103E-03 | 1.054078E-03  |
| 35    | H5    | 3.975139E-03  | -4.172060E-03 | 3.253721E-03  |
| 36    | H8    | -3.246331E-03 | 2.092198E-03  | 1.982446E-03  |
| total |       | -1.943880E-05 | 1.421568E-04  | -7.227703E-04 |

end of program der1b

start of program geopt 5

geometry optimization step 5

reading input hessian of dimension 108  
in five columns format

reading input hessian of dimension 108

in five columns format  
reading input hessian of dimension 108  
in five columns format

energy change: -2.9525E-04 . ( 5.0000E-05 )  
gradient maximum: 6.5112E-03 . ( 4.5000E-04 )  
gradient rms: 1.3323E-03 . ( 3.0000E-04 )  
step size: 0.10676 trust radius: 0.30000  
displacement maximum: 4.7006E-02 . ( 1.8000E-03 )  
displacement rms: 9.6652E-03 . ( 1.2000E-03 )  
predicted energy change: -3.1709E-04 geom step: 1.0676E-  
01 full step: 1.0676E-01  
molecular structure not yet converged...

center of mass moved by:  
x: -3.5337E-03 y: 2.9124E-03 z: 2.1934E-03

new geometry:

|      | angstroms     |               |               |
|------|---------------|---------------|---------------|
| atom | x             | y             | z             |
| H1   | -0.2344385411 | 1.3364228531  | -2.0667070982 |
| C1   | -0.1506901513 | 1.7741528144  | -1.0904591912 |
| C2   | 0.0955808939  | 2.9156235693  | 1.4078351314  |
| C3   | 0.2323643835  | 0.9758613033  | -0.0253863064 |
| C4   | -0.4181426541 | 3.1253566840  | -0.9264949330 |
| C5   | -0.3017754596 | 3.6891436387  | 0.3286321546  |
| C6   | 0.3798253710  | 1.5651914599  | 1.2396659215  |
| C7   | 0.5896607348  | -0.4962320424 | -0.1602410297 |
| H3   | -0.7108620707 | 3.7223672554  | -1.7715551535 |
| H4   | -0.5144793653 | 4.7335487966  | 0.4797902349  |
| H6   | 0.1826731673  | 3.3746323306  | 2.3733599051  |
| H7   | 1.6786088441  | -0.5367428888 | -0.1964787350 |
| C10  | 0.0972623924  | -1.2125831964 | -1.4084184665 |
| C8   | 0.1938500468  | -1.2454542803 | 1.1305180322  |
| C17  | -1.3126544312 | -1.3967971446 | 1.3890162854  |
| N2   | 0.8514294863  | 0.7972393659  | 2.3303292176  |
| C9   | 0.8189689222  | -0.5711590604 | 2.3353520859  |
| C16  | 1.3677897324  | 1.4697464553  | 3.5150302751  |
| O1   | 1.2303401913  | -1.2107769044 | 3.2628019889  |
| C11  | -0.7487994201 | -2.6694740655 | -3.6501763233 |
| C12  | 0.9774683268  | -2.0319907690 | -2.1057483750 |
| C13  | -1.2185751344 | -1.1313055703 | -1.8601168777 |
| C14  | -1.6372039610 | -1.8512176390 | -2.9679801387 |
| C15  | 0.5619182715  | -2.7565377345 | -3.2152392822 |
| H19  | 2.0013675137  | -2.1092659092 | -1.7790936517 |
| H20  | -1.9218381946 | -0.4974916153 | -1.3496088765 |
| H21  | -2.6593870529 | -1.7717986876 | -3.2970586587 |
| H22  | 1.2648630101  | -3.3848574016 | -3.7356945104 |
| H23  | -1.0756366493 | -3.2283082760 | -4.5096926231 |
| H27  | -1.8236843591 | -0.4397355171 | 1.3843325766  |
| H29  | -1.7665598344 | -2.0305719249 | 0.6392268879  |

S580



|     |               |               |              |
|-----|---------------|---------------|--------------|
| H30 | 0.6325418295  | -2.2362990528 | 1.1023133627 |
| H15 | -1.4677484430 | -1.8605599611 | 2.3568907829 |
| H2  | 2.0692522862  | 2.2421623047  | 3.2296189653 |
| H5  | 1.8687512123  | 0.7359276318  | 4.1223141056 |
| H8  | 0.5693062719  | 1.9174617110  | 4.0954051281 |

nuclear repulsion energy..... 1397.567973708 hartrees

-----  
 / end of geometry optimization iteration 5 /  
 -----

end of program geopt

start of program onee  
 smallest eigenvalue of S: 3.366E-04  
 number of canonical orbitals..... 368  
 end of program onee

start of program probe  
 end of program probe

start of program grid

number of gridpoints:

| atom     | H1  | C1  | C2  | C3  | C4  | C5  | C6  |
|----------|-----|-----|-----|-----|-----|-----|-----|
| C7       |     |     |     |     |     |     |     |
| grid # 1 | 71  | 88  | 89  | 88  | 89  | 87  | 86  |
| 81       |     |     |     |     |     |     |     |
| grid # 2 | 115 | 96  | 95  | 97  | 97  | 97  | 93  |
| 90       |     |     |     |     |     |     |     |
| grid # 3 | 210 | 184 | 182 | 192 | 182 | 183 | 194 |
| 175      |     |     |     |     |     |     |     |
| grid # 4 | 209 | 327 | 327 | 340 | 327 | 327 | 328 |
| 313      |     |     |     |     |     |     |     |

number of gridpoints:

| atom     | H3  | H4  | H6  | H7  | C10 | C8  | C17 |
|----------|-----|-----|-----|-----|-----|-----|-----|
| N2       |     |     |     |     |     |     |     |
| grid # 1 | 73  | 73  | 70  | 67  | 92  | 82  | 73  |
| 96       |     |     |     |     |     |     |     |
| grid # 2 | 118 | 118 | 111 | 107 | 100 | 90  | 80  |
| 106      |     |     |     |     |     |     |     |
| grid # 3 | 223 | 223 | 207 | 207 | 197 | 174 | 147 |
| 211      |     |     |     |     |     |     |     |
| grid # 4 | 224 | 223 | 207 | 204 | 341 | 313 | 288 |
| 392      |     |     |     |     |     |     |     |

number of gridpoints:

|          |     |     |     |     |     |     |     |
|----------|-----|-----|-----|-----|-----|-----|-----|
| atom     | C9  | C16 | O1  | C11 | C12 | C13 | C14 |
| C15      |     |     |     |     |     |     |     |
| grid # 1 | 81  | 69  | 111 | 89  | 88  | 87  | 89  |
| 89       |     |     |     |     |     |     |     |
| grid # 2 | 90  | 78  | 122 | 97  | 95  | 95  | 95  |
| 97       |     |     |     |     |     |     |     |
| grid # 3 | 175 | 147 | 259 | 184 | 182 | 182 | 183 |
| 184      |     |     |     |     |     |     |     |
| grid # 4 | 292 | 274 | 454 | 328 | 326 | 325 | 326 |
| 328      |     |     |     |     |     |     |     |

number of gridpoints:

|          |     |     |     |     |     |     |     |
|----------|-----|-----|-----|-----|-----|-----|-----|
| atom     | H19 | H20 | H21 | H22 | H23 | H27 | H29 |
| H30      |     |     |     |     |     |     |     |
| grid # 1 | 72  | 69  | 73  | 73  | 73  | 72  | 71  |
| 69       |     |     |     |     |     |     |     |
| grid # 2 | 113 | 112 | 118 | 118 | 118 | 109 | 108 |
| 109      |     |     |     |     |     |     |     |
| grid # 3 | 214 | 209 | 223 | 223 | 224 | 215 | 210 |
| 214      |     |     |     |     |     |     |     |
| grid # 4 | 213 | 205 | 223 | 224 | 224 | 212 | 207 |
| 207      |     |     |     |     |     |     |     |

number of gridpoints:

|          |     |     |     |     |       |
|----------|-----|-----|-----|-----|-------|
| atom     | H15 | H2  | H5  | H8  | total |
| grid # 1 | 71  | 71  | 70  | 71  | 2863  |
| grid # 2 | 109 | 111 | 107 | 111 | 3722  |
| grid # 3 | 219 | 217 | 212 | 215 | 7182  |
| grid # 4 | 218 | 213 | 209 | 216 | 9914  |

end of program grid

start of program rwr

end of program rwr

start of program scf

|      | i | u | d | i | g |                  | RMS     | maximum |
|------|---|---|---|---|---|------------------|---------|---------|
|      | t | p | i | c | r |                  | energy  | DIIS    |
|      | e | d | i | u | i | total energy     | density | error   |
|      | r | t | s | t | d |                  | change  |         |
| etot | 1 | N | N | 2 | U | -783.02910080271 | 9.9E-05 | 2.1E-03 |
| etot | 2 | Y | Y | 6 | M | -783.03026808027 | 1.2E-03 | 5.0E-04 |
| etot | 3 | Y | Y | 6 | M | -783.03040309899 | 1.4E-04 | 1.3E-04 |
| etot | 4 | Y | Y | 6 | M | -783.03040750325 | 4.4E-06 | 7.0E-05 |
| etot | 5 | Y | N | 6 | M | -783.03041185602 | 4.4E-06 | 0.0E+00 |

Energy components, in hartrees:

(A) Nuclear repulsion..... 1397.56797370847  
 (E) Total one-electron terms..... -3839.50158436416  
 (I) Total two-electron terms..... 1658.90319879967  
 (L) Electronic energy..... -2180.59838556449 (E+I)  
 (N) Total energy..... -783.03041185602 (A+L)

SCFE: SCF energy: HF -783.03041185602 hartrees iterations:

5

HOMO energy: -0.30083  
 LUMO energy: 0.12971

Orbital energies:

|           |           |           |           |           |           |
|-----------|-----------|-----------|-----------|-----------|-----------|
| -20.52356 | -15.60168 | -11.34382 | -11.28653 | -11.25478 | -11.25148 |
| -11.24502 | -11.24382 | -11.24089 | -11.23732 | -11.23637 | -11.23591 |
| -11.23491 | -11.23439 | -11.23391 | -11.23363 | -11.23346 | -11.22826 |
| -11.21936 | -1.39566  | -1.26866  | -1.16856  | -1.14885  | -1.10779  |
| -1.03292  | -1.02077  | -1.01870  | -1.01556  | -0.95830  | -0.94000  |
| -0.85719  | -0.84802  | -0.83250  | -0.82937  | -0.78967  | -0.74169  |
| -0.71162  | -0.69798  | -0.67023  | -0.66152  | -0.64802  | -0.63555  |
| -0.63382  | -0.61748  | -0.61115  | -0.60191  | -0.60048  | -0.58656  |
| -0.57768  | -0.56651  | -0.55208  | -0.54617  | -0.52530  | -0.52140  |
| -0.51813  | -0.51198  | -0.50430  | -0.49292  | -0.48299  | -0.47650  |
| -0.46691  | -0.41997  | -0.40827  | -0.34116  | -0.33670  | -0.32815  |
| -0.30083  | 0.12971   | 0.13473   | 0.13974   | 0.14909   | 0.20815   |
| 0.23336   | 0.24099   | 0.25566   | 0.26410   | 0.26811   |           |

end of program scf

start of program derla  
 end of program derla

start of program rwr  
 end of program rwr

start of program derlb

forces (hartrees/bohr) : total

| atom | label | x             | y             | z             |
|------|-------|---------------|---------------|---------------|
| 1    | H1    | -7.677519E-05 | 9.231691E-05  | -2.085869E-04 |
| 2    | C1    | 2.638254E-04  | 1.373339E-04  | 8.801134E-04  |
| 3    | C2    | 3.340346E-04  | -4.116849E-04 | -1.380336E-04 |
| 4    | C3    | -1.380576E-04 | 4.756051E-04  | 6.968111E-04  |
| 5    | C4    | 5.583649E-05  | 8.550326E-04  | 5.674120E-04  |
| 6    | C5    | -3.172298E-04 | 1.401291E-04  | -9.692243E-04 |
| 7    | C6    | -1.857771E-04 | -6.773380E-04 | -4.955440E-05 |

S583

|       |       |               |               |               |
|-------|-------|---------------|---------------|---------------|
| 8     | C7    | 6.746545E-04  | 4.564955E-04  | 3.065577E-04  |
| 9     | H3    | -1.426525E-04 | 2.151106E-05  | 4.214973E-05  |
| 10    | H4    | 4.895112E-05  | -4.737249E-04 | -1.290728E-04 |
| 11    | H6    | 8.463041E-05  | -3.160262E-04 | -2.309591E-04 |
| 12    | H7    | -3.220387E-04 | -1.415180E-04 | 1.012424E-04  |
| 13    | C10   | 3.327392E-04  | -4.352003E-04 | -7.131503E-04 |
| 14    | C8    | 5.427940E-04  | -4.594948E-04 | 1.692938E-04  |
| 15    | C17   | -3.938421E-04 | -2.278407E-04 | 2.629914E-04  |
| 16    | N2    | 1.450680E-04  | 3.401701E-03  | -1.649495E-03 |
| 17    | C9    | 2.732981E-04  | -5.776904E-04 | 8.615798E-05  |
| 18    | C16   | 5.898423E-04  | -1.257988E-03 | 3.619358E-04  |
| 19    | O1    | -3.287448E-04 | -2.485561E-03 | 9.162736E-04  |
| 20    | C11   | -7.723931E-05 | 3.497281E-04  | 3.113015E-04  |
| 21    | C12   | 1.382483E-04  | -8.549751E-04 | -1.082815E-03 |
| 22    | C13   | -1.459641E-03 | -4.229424E-04 | -1.063213E-03 |
| 23    | C14   | -2.085096E-04 | 6.828661E-04  | 8.048751E-04  |
| 24    | C15   | 1.065549E-03  | 2.696887E-04  | 8.198818E-04  |
| 25    | H19   | -4.769495E-04 | 1.486419E-05  | -2.783714E-04 |
| 26    | H20   | 4.562577E-04  | -5.008561E-04 | -4.952691E-04 |
| 27    | H21   | 4.822561E-04  | -4.858213E-06 | 1.097425E-04  |
| 28    | H22   | -4.113609E-04 | 4.757333E-04  | 3.450845E-04  |
| 29    | H23   | 8.216108E-05  | 1.505863E-04  | 1.296339E-04  |
| 30    | H27   | -5.314500E-05 | 1.790009E-04  | -1.862372E-05 |
| 31    | H29   | -2.122706E-04 | -1.563683E-04 | -1.181797E-04 |
| 32    | H30   | -1.746330E-04 | 6.431940E-04  | 2.759460E-04  |
| 33    | H15   | 2.630713E-04  | 5.479680E-05  | 4.123383E-05  |
| 34    | H2    | 4.232723E-04  | 7.208649E-04  | -1.115212E-03 |
| 35    | H5    | -2.022641E-04 | 3.705423E-04  | -1.116619E-04 |
| 36    | H8    | -9.564148E-04 | 9.562734E-05  | 4.305030E-04  |
| ----- |       | -----         | -----         | -----         |
|       | total | 1.189441E-04  | 1.835517E-04  | -7.122818E-04 |

end of program der1b

start of program geopt 6

geometry optimization step 6

reading input hessian of dimension 108

in five columns format

reading input hessian of dimension 108

in five columns format

energy change: -1.2579E-04 . ( 5.0000E-05 )

gradient maximum: 3.9949E-03 . ( 4.5000E-04 )

gradient rms: 7.9005E-04 . ( 3.0000E-04 )

step size: 0.10684 trust radius: 0.30000

displacement maximum: 5.2270E-02 . ( 1.8000E-03 )

displacement rms: 9.6727E-03 . ( 1.2000E-03 )

predicted energy change: -1.5780E-04 geom step: 1.0684E-

01 full step: 1.0684E-01

molecular structure not yet converged...

center of mass moved by:

x: -6.8973E-03 y: -1.8351E-03 z: 3.4367E-03

new geometry:

|      | angstroms     |               |               |
|------|---------------|---------------|---------------|
| atom | x             | y             | z             |
| H1   | -0.2741512903 | 1.3380230570  | -2.0609177057 |
| C1   | -0.1725178922 | 1.7735932523  | -1.0852572003 |
| C2   | 0.1252525523  | 2.9193573079  | 1.4041091320  |
| C3   | 0.2278596169  | 0.9764452612  | -0.0261866593 |
| C4   | -0.4354563879 | 3.1260628221  | -0.9191494867 |
| C5   | -0.2925082833 | 3.6921803109  | 0.3316265415  |
| C6   | 0.3989044503  | 1.5676612824  | 1.2342033646  |
| C7   | 0.5803056497  | -0.4971966090 | -0.1559710956 |
| H3   | -0.7460372804 | 3.7206491555  | -1.7598040024 |
| H4   | -0.5012009509 | 4.7355263666  | 0.4849860661  |
| H6   | 0.2335055585  | 3.3790617275  | 2.3660491144  |
| H7   | 1.6684534895  | -0.5421636806 | -0.1804297266 |
| C10  | 0.0999269605  | -1.2159174577 | -1.4097148021 |
| C8   | 0.1724198069  | -1.2402403969 | 1.1356872967  |
| C17  | -1.3366137596 | -1.3842553449 | 1.3901218274  |
| N2   | 0.8750790352  | 0.7990704072  | 2.3203115983  |
| C9   | 0.7945423570  | -0.5726669086 | 2.3463360528  |
| C16  | 1.4100438272  | 1.4692013331  | 3.4967352591  |
| O1   | 1.1497004023  | -1.2224589171 | 3.2955415282  |
| C11  | -0.7204227544 | -2.6704162059 | -3.6603281268 |
| C12  | 0.9936852451  | -2.0184661813 | -2.1103964568 |
| C13  | -1.2169305588 | -1.1513823228 | -1.8638384988 |
| C14  | -1.6228785664 | -1.8696838731 | -2.9752917407 |
| C15  | 0.5911763521  | -2.7413941791 | -3.2236887911 |
| H19  | 2.0167321907  | -2.0821224705 | -1.7835509958 |
| H20  | -1.9290836252 | -0.5325161328 | -1.3521740984 |
| H21  | -2.6436735205 | -1.8040759109 | -3.3067510726 |
| H22  | 1.3022417960  | -3.3545098117 | -3.7472238791 |
| H23  | -1.0370275963 | -3.2275355231 | -4.5239745698 |
| H27  | -1.8419527167 | -0.4243513628 | 1.3890130596  |
| H29  | -1.7924833813 | -2.0123255821 | 0.6386016041  |
| H30  | 0.6061793022  | -2.2314107719 | 1.1131972238  |
| H15  | -1.4934632539 | -1.8506460728 | 2.3552214678  |
| H2   | 2.0996127162  | 2.2456458246  | 3.1985927063  |
| H5   | 1.9269778785  | 0.7336512853  | 4.0914252835  |
| H8   | 0.6165446113  | 1.9102440959  | 4.0937021100  |

nuclear repulsion energy..... 1396.727595837 hartrees

-----  
/ end of geometry optimization iteration 6 /  
-----

end of program geopt

start of program onee  
 smallest eigenvalue of S: 3.367E-04  
 number of canonical orbitals..... 368  
 end of program onee

start of program probe  
 end of program probe

start of program grid

| number of gridpoints: |          | H1  | C1  | C2  | C3  | C4  | C5  | C6  |
|-----------------------|----------|-----|-----|-----|-----|-----|-----|-----|
| C7                    | atom     |     |     |     |     |     |     |     |
|                       | grid # 1 | 71  | 87  | 89  | 88  | 89  | 87  | 86  |
| 81                    | grid # 2 | 115 | 96  | 95  | 97  | 97  | 97  | 93  |
| 90                    | grid # 3 | 210 | 184 | 182 | 192 | 182 | 183 | 192 |
| 176                   | grid # 4 | 208 | 327 | 327 | 340 | 327 | 327 | 328 |
| 311                   |          |     |     |     |     |     |     |     |

| number of gridpoints: |          | H3  | H4  | H6  | H7  | C10 | C8  | C17 |
|-----------------------|----------|-----|-----|-----|-----|-----|-----|-----|
| N2                    | atom     |     |     |     |     |     |     |     |
|                       | grid # 1 | 73  | 73  | 70  | 67  | 92  | 81  | 73  |
| 94                    | grid # 2 | 118 | 118 | 111 | 106 | 100 | 90  | 80  |
| 104                   | grid # 3 | 223 | 223 | 207 | 207 | 197 | 175 | 150 |
| 213                   | grid # 4 | 224 | 223 | 207 | 204 | 341 | 315 | 287 |
| 391                   |          |     |     |     |     |     |     |     |

| number of gridpoints: |          | C9  | C16 | O1  | C11 | C12 | C13 | C14 |
|-----------------------|----------|-----|-----|-----|-----|-----|-----|-----|
| C15                   | atom     |     |     |     |     |     |     |     |
|                       | grid # 1 | 81  | 69  | 110 | 89  | 88  | 87  | 89  |
| 89                    | grid # 2 | 90  | 79  | 122 | 97  | 95  | 95  | 95  |
| 97                    | grid # 3 | 176 | 140 | 260 | 184 | 183 | 182 | 183 |
| 184                   | grid # 4 | 294 | 272 | 455 | 328 | 326 | 325 | 326 |
| 328                   |          |     |     |     |     |     |     |     |

| number of gridpoints: |      | H19 | H20 | H21 | H22 | H23 | H27 | H29 |
|-----------------------|------|-----|-----|-----|-----|-----|-----|-----|
| H30                   | atom |     |     |     |     |     |     |     |

```

grid # 1      72      69      73      73      73      72      70
69
grid # 2      112     112     118     118     118     109     108
108
grid # 3      214     209     223     223     224     215     210
215
grid # 4      213     205     223     224     224     212     207
208

```

number of gridpoints:

| atom     | H15 | H2  | H5  | H8  | total |
|----------|-----|-----|-----|-----|-------|
| grid # 1 | 71  | 71  | 70  | 71  | 2857  |
| grid # 2 | 109 | 111 | 108 | 111 | 3719  |
| grid # 3 | 219 | 216 | 212 | 216 | 7184  |
| grid # 4 | 217 | 213 | 209 | 217 | 9913  |

end of program grid

start of program rwr

end of program rwr

start of program scf

|      | i | u | d | i | g |                  | RMS     | maximum |
|------|---|---|---|---|---|------------------|---------|---------|
|      | t | p | i | c | r |                  | density | DIIS    |
|      | e | d | i | u | i | energy           | change  | error   |
|      | r | t | s | t | d | total energy     | change  |         |
| etot | 1 | N | N | 2 | U | -783.02656911709 | 1.5E-04 | 3.4E-03 |
| etot | 2 | Y | Y | 6 | M | -783.03004227068 | 3.5E-03 | 1.0E-03 |
| etot | 3 | Y | Y | 6 | M | -783.03046734550 | 4.3E-04 | 2.4E-04 |
| etot | 4 | N | Y | 2 | U | -783.03048851925 | 2.1E-05 | 1.3E-04 |
| etot | 5 | Y | Y | 6 | M | -783.03049339769 | 4.9E-06 | 5.7E-05 |
| etot | 6 | Y | N | 6 | M | -783.03049388296 | 4.9E-07 | 0.0E+00 |

Energy components, in hartrees:

|     |                               |                   |       |
|-----|-------------------------------|-------------------|-------|
| (A) | Nuclear repulsion.....        | 1396.72759583692  |       |
| (E) | Total one-electron terms..... | -3837.82092731570 |       |
| (I) | Total two-electron terms..... | 1658.06283759581  |       |
| (L) | Electronic energy.....        | -2179.75808971988 | (E+I) |
| (N) | Total energy.....             | -783.03049388296  | (A+L) |

SCFE: SCF energy: HF -783.03049388296 hartrees iterations:  
6

HOMO energy: -0.30100  
LUMO energy: 0.12978

Orbital energies:

|           |           |           |           |           |           |
|-----------|-----------|-----------|-----------|-----------|-----------|
| -20.52505 | -15.60225 | -11.34540 | -11.28608 | -11.25556 | -11.25135 |
| -11.24520 | -11.24363 | -11.24076 | -11.23722 | -11.23610 | -11.23558 |
| -11.23502 | -11.23419 | -11.23368 | -11.23339 | -11.23331 | -11.22838 |
| -11.21886 | -1.39273  | -1.26891  | -1.16835  | -1.14895  | -1.10746  |
| -1.03263  | -1.02095  | -1.01909  | -1.01574  | -0.95795  | -0.94005  |
| -0.85742  | -0.84770  | -0.83275  | -0.82952  | -0.78999  | -0.74180  |
| -0.71170  | -0.69828  | -0.66969  | -0.66178  | -0.64782  | -0.63572  |
| -0.63366  | -0.61767  | -0.61076  | -0.60168  | -0.60072  | -0.58739  |
| -0.57729  | -0.56657  | -0.55182  | -0.54713  | -0.52448  | -0.52147  |
| -0.51810  | -0.51169  | -0.50434  | -0.49280  | -0.48279  | -0.47643  |
| -0.46694  | -0.41994  | -0.40882  | -0.34106  | -0.33688  | -0.32821  |
| -0.30100  | 0.12978   | 0.13503   | 0.13994   | 0.14887   | 0.20594   |
| 0.23335   | 0.24132   | 0.25597   | 0.26421   | 0.26853   |           |

end of program scf

start of program derla

end of program derla

start of program rwr

end of program rwr

start of program derlb

forces (hartrees/bohr) : total

| atom | label | x             | y             | z             |
|------|-------|---------------|---------------|---------------|
| 1    | H1    | -5.296982E-05 | -3.951173E-04 | 7.411375E-05  |
| 2    | C1    | 9.907697E-05  | 5.407540E-04  | 1.234864E-04  |
| 3    | C2    | -4.717926E-05 | -1.038051E-04 | -7.144838E-04 |
| 4    | C3    | 1.761000E-04  | -8.715255E-05 | 1.264820E-04  |
| 5    | C4    | 7.962032E-05  | 3.446371E-04  | 5.289804E-04  |
| 6    | C5    | 3.196140E-05  | -8.469596E-04 | -9.089075E-04 |
| 7    | C6    | -8.559902E-04 | -1.294815E-04 | -4.306339E-04 |
| 8    | C7    | -2.515919E-04 | -1.448884E-04 | 2.158885E-05  |
| 9    | H3    | 4.533722E-05  | -3.383463E-05 | 2.160514E-04  |
| 10   | H4    | -2.257503E-05 | 5.991930E-04  | 6.148878E-05  |
| 11   | H6    | -7.920108E-05 | 9.247325E-05  | 4.246163E-04  |
| 12   | H7    | 2.873300E-04  | 5.025521E-05  | -4.988166E-05 |
| 13   | C10   | 1.480745E-04  | -9.282448E-05 | 3.203226E-05  |
| 14   | C8    | 2.184431E-04  | 2.449099E-04  | -1.832425E-04 |
| 15   | C17   | 7.505695E-04  | 3.371929E-04  | 3.208913E-04  |
| 16   | N2    | 1.962310E-03  | -3.808634E-03 | 3.466456E-04  |
| 17   | C9    | -7.788159E-04 | -9.254854E-04 | 4.562717E-03  |
| 18   | C16   | -1.139246E-03 | -2.252224E-03 | 2.057309E-03  |
| 19   | O1    | -9.483710E-04 | 5.475285E-03  | -5.834743E-03 |
| 20   | C11   | 1.891329E-04  | 4.917343E-04  | 5.709381E-04  |

S588



|       |       |               |               |               |
|-------|-------|---------------|---------------|---------------|
| 21    | C12   | -7.646449E-04 | 3.179836E-04  | 3.997883E-05  |
| 22    | C13   | 6.030974E-04  | -4.114957E-04 | -2.320855E-04 |
| 23    | C14   | 9.963530E-04  | -4.596421E-04 | -2.908264E-04 |
| 24    | C15   | -1.000750E-03 | 4.567750E-04  | 5.035355E-05  |
| 25    | H19   | 6.333005E-04  | -3.328232E-05 | 1.977137E-04  |
| 26    | H20   | -5.753543E-04 | 6.528583E-04  | 4.036981E-04  |
| 27    | H21   | -5.898393E-04 | 1.342095E-04  | -1.348524E-04 |
| 28    | H22   | 5.576637E-04  | -3.876170E-04 | -2.630419E-04 |
| 29    | H23   | -4.301430E-05 | -1.686902E-04 | -2.147066E-04 |
| 30    | H27   | -1.040082E-04 | 3.774070E-04  | -1.041649E-04 |
| 31    | H29   | -4.820114E-04 | -6.134559E-04 | -8.335812E-04 |
| 32    | H30   | -2.328785E-05 | -8.258124E-04 | -1.169381E-04 |
| 33    | H15   | 7.454160E-05  | -1.334916E-04 | 6.151745E-04  |
| 34    | H2    | 9.815930E-04  | 1.151536E-03  | -9.994230E-04 |
| 35    | H5    | -7.754705E-04 | 1.238134E-03  | -2.598928E-04 |
| 36    | H8    | 8.357666E-04  | -4.888537E-04 | 1.161865E-04  |
| ----- |       | -----         | -----         | -----         |
|       | total | 1.359512E-04  | 1.625905E-04  | -6.809589E-04 |

end of program derlb

start of program geopt 7

geometry optimization step 7

reading input hessian of dimension 108  
in five columns format  
reading input hessian of dimension 108  
in five columns format  
reading input hessian of dimension 108  
in five columns format

energy change: -8.2027E-05 . ( 5.0000E-05 )  
gradient maximum: 7.8198E-03 . ( 4.5000E-04 )  
gradient rms: 1.0535E-03 . ( 3.0000E-04 )  
step size: 0.04120 trust radius: 0.30000  
displacement maximum: 1.7489E-02 . ( 1.8000E-03 )  
displacement rms: 3.7302E-03 . ( 1.2000E-03 )  
predicted energy change: -1.0975E-04 geom step: 4.1201E-02  
02 full step: 4.1201E-02  
molecular structure not yet converged...

center of mass moved by:

x: 1.1760E-03 y: -1.9126E-03 z: -1.6634E-03

new geometry:

|      | angstroms     |              |               |
|------|---------------|--------------|---------------|
| atom | x             | y            | z             |
| H1   | -0.2927369916 | 1.3311009777 | -2.0554944921 |
| C1   | -0.1833266911 | 1.7707818843 | -1.0814524423 |
| C2   | 0.1267260072  | 2.9174976644 | 1.4044586765  |

|     |               |               |               |
|-----|---------------|---------------|---------------|
| C3  | 0.2199683484  | 0.9732541177  | -0.0236541144 |
| C4  | -0.4419431708 | 3.1248845165  | -0.9163891626 |
| C5  | -0.2927540908 | 3.6913246877  | 0.3327114767  |
| C6  | 0.3956491473  | 1.5646951980  | 1.2355835888  |
| C7  | 0.5716810068  | -0.5008285830 | -0.1519816209 |
| H3  | -0.7544811817 | 3.7194774437  | -1.7563785568 |
| H4  | -0.4967947848 | 4.7362286818  | 0.4866510049  |
| H6  | 0.2396511045  | 3.3763832975  | 2.3669312926  |
| H7  | 1.6604873235  | -0.5470458947 | -0.1732229591 |
| C10 | 0.0960056906  | -1.2192172516 | -1.4072948963 |
| C8  | 0.1609283529  | -1.2414716764 | 1.1400339486  |
| C17 | -1.3475438917 | -1.3720832891 | 1.4020565381  |
| N2  | 0.8827199245  | 0.7966724416  | 2.3180833383  |
| C9  | 0.7938459386  | -0.5732806090 | 2.3437817460  |
| C16 | 1.4184932870  | 1.4664782474  | 3.4919541703  |
| O1  | 1.1650996617  | -1.2188767325 | 3.2830694681  |
| C11 | -0.7086989041 | -2.6654658313 | -3.6654603554 |
| C12 | 0.9956718872  | -2.0168673786 | -2.1062975728 |
| C13 | -1.2194682531 | -1.1562022581 | -1.8664761269 |
| C14 | -1.6169864336 | -1.8701667809 | -2.9826344184 |
| C15 | 0.6005652448  | -2.7358403235 | -3.2232090427 |
| H19 | 2.0184553212  | -2.0775116827 | -1.7746360536 |
| H20 | -1.9351051178 | -0.5373858176 | -1.3577621572 |
| H21 | -2.6365974981 | -1.8040888398 | -3.3205404821 |
| H22 | 1.3168670014  | -3.3453233708 | -3.7449957669 |
| H23 | -1.0194863279 | -3.2198166288 | -4.5335692514 |
| H27 | -1.8460472255 | -0.4080812591 | 1.3968718944  |
| H29 | -1.8137390329 | -2.0016216367 | 0.6563096060  |
| H30 | 0.5853010360  | -2.2374801088 | 1.1180107926  |
| H15 | -1.5013171791 | -1.8297001213 | 2.3719810793  |
| H2  | 2.1010121118  | 2.2509239933  | 3.1895373516  |
| H5  | 1.9420961548  | 0.7377896051  | 4.0817194930  |
| H8  | 0.6261417945  | 1.8979367630  | 4.0942044532  |

nuclear repulsion energy..... 1397.135769061 hartrees

-----  
 / end of geometry optimization iteration 7 /  
 -----

end of program geopt

start of program onee

smallest eigenvalue of S: 3.368E-04

number of canonical orbitals..... 368

end of program onee

start of program probe

end of program probe

start of program grid

number of gridpoints:

|          | atom | H1  | C1  | C2  | C3  | C4  | C5  | C6  |
|----------|------|-----|-----|-----|-----|-----|-----|-----|
| C7       |      |     |     |     |     |     |     |     |
| grid # 1 |      | 71  | 88  | 89  | 88  | 89  | 87  | 86  |
| 81       |      |     |     |     |     |     |     |     |
| grid # 2 |      | 115 | 96  | 95  | 97  | 97  | 97  | 93  |
| 90       |      |     |     |     |     |     |     |     |
| grid # 3 |      | 210 | 184 | 183 | 192 | 182 | 183 | 194 |
| 176      |      |     |     |     |     |     |     |     |
| grid # 4 |      | 208 | 327 | 326 | 340 | 327 | 327 | 328 |
| 312      |      |     |     |     |     |     |     |     |

number of gridpoints:

|          | atom | H3  | H4  | H6  | H7  | C10 | C8  | C17 |
|----------|------|-----|-----|-----|-----|-----|-----|-----|
| N2       |      |     |     |     |     |     |     |     |
| grid # 1 |      | 73  | 73  | 70  | 67  | 92  | 82  | 72  |
| 94       |      |     |     |     |     |     |     |     |
| grid # 2 |      | 118 | 118 | 112 | 107 | 100 | 90  | 80  |
| 104      |      |     |     |     |     |     |     |     |
| grid # 3 |      | 223 | 223 | 207 | 206 | 197 | 174 | 151 |
| 210      |      |     |     |     |     |     |     |     |
| grid # 4 |      | 224 | 223 | 205 | 206 | 341 | 313 | 290 |
| 391      |      |     |     |     |     |     |     |     |

number of gridpoints:

|          | atom | C9  | C16 | O1  | C11 | C12 | C13 | C14 |
|----------|------|-----|-----|-----|-----|-----|-----|-----|
| C15      |      |     |     |     |     |     |     |     |
| grid # 1 |      | 81  | 69  | 110 | 89  | 88  | 87  | 89  |
| 89       |      |     |     |     |     |     |     |     |
| grid # 2 |      | 90  | 78  | 122 | 97  | 95  | 95  | 95  |
| 97       |      |     |     |     |     |     |     |     |
| grid # 3 |      | 175 | 147 | 260 | 184 | 183 | 183 | 183 |
| 184      |      |     |     |     |     |     |     |     |
| grid # 4 |      | 292 | 275 | 456 | 328 | 326 | 325 | 326 |
| 328      |      |     |     |     |     |     |     |     |

number of gridpoints:

|          | atom | H19 | H20 | H21 | H22 | H23 | H27 | H29 |
|----------|------|-----|-----|-----|-----|-----|-----|-----|
| H30      |      |     |     |     |     |     |     |     |
| grid # 1 |      | 72  | 69  | 73  | 73  | 73  | 72  | 70  |
| 69       |      |     |     |     |     |     |     |     |
| grid # 2 |      | 112 | 111 | 118 | 118 | 118 | 109 | 109 |
| 109      |      |     |     |     |     |     |     |     |
| grid # 3 |      | 214 | 209 | 223 | 223 | 224 | 215 | 210 |
| 214      |      |     |     |     |     |     |     |     |
| grid # 4 |      | 213 | 205 | 223 | 223 | 224 | 212 | 207 |
| 208      |      |     |     |     |     |     |     |     |

number of gridpoints:

| atom | H15 | H2 | H5 | H8 | total |
|------|-----|----|----|----|-------|
|------|-----|----|----|----|-------|

```

grid # 1      71      71      70      71      2858
grid # 2     110     111     107     111     3721
grid # 3     219     216     213     216     7190
grid # 4     218     213     209     216     9915

```

end of program grid

```

start of program rwr
end of program rwr

```

start of program scf

|      | i | u | d | i | g |                  | energy  | RMS     | maximum |
|------|---|---|---|---|---|------------------|---------|---------|---------|
|      | t | p | i | c | r |                  | change  | density | DIIS    |
|      | e | d | i | u | i | total energy     |         | change  | error   |
|      | r | t | s | t | d |                  |         |         |         |
| etot | 1 | N | N | 1 | U | -783.02992975121 |         | 6.7E-05 | 1.0E-03 |
| etot | 2 | Y | Y | 4 | M | -783.03035591409 | 4.3E-04 | 2.3E-05 | 3.0E-04 |
| etot | 3 | Y | Y | 4 | M | -783.03040783438 | 5.2E-05 | 6.2E-06 | 1.2E-04 |
| etot | 4 | Y | Y | 4 | M | -783.03041044265 | 2.6E-06 | 3.2E-06 | 5.4E-05 |
| etot | 5 | Y | N | 4 | M | -783.03041266576 | 2.2E-06 | 0.0E+00 | 0.0E+00 |

Energy components, in hartrees:

```

(A) Nuclear repulsion..... 1397.13576906084
(E) Total one-electron terms..... -3838.64016195461
(I) Total two-electron terms..... 1658.47398022801
(L) Electronic energy..... -2180.16618172660 (E+I)
(N) Total energy..... -783.03041266576 (A+L)

```

SCFE: SCF energy: HF -783.03041266576 hartrees iterations:  
5

```

HOMO energy: -0.30091
LUMO energy: 0.12998

```

Orbital energies:

```

-20.52481 -15.60145 -11.34425 -11.28566 -11.25496 -11.25114
-11.24498 -11.24334 -11.24059 -11.23713 -11.23604 -11.23547
-11.23492 -11.23399 -11.23361 -11.23331 -11.23317 -11.22825
-11.21919 -1.39614 -1.26917 -1.16837 -1.14885 -1.10753
-1.03264 -1.02093 -1.01913 -1.01542 -0.95821 -0.93989
-0.85729 -0.84730 -0.83260 -0.82929 -0.78973 -0.74176
-0.71167 -0.69820 -0.66993 -0.66189 -0.64802 -0.63540
-0.63386 -0.61741 -0.61119 -0.60175 -0.60086 -0.58746
-0.57739 -0.56653 -0.55209 -0.54726 -0.52499 -0.52127
-0.51783 -0.51183 -0.50441 -0.49279 -0.48276 -0.47661
-0.46683 -0.41987 -0.40868 -0.34091 -0.33688 -0.32807

```

-0.30091 0.12998 0.13541 0.14014 0.14911 0.20705  
0.23321 0.24162 0.25601 0.26458 0.26837

end of program scf

start of program der1a  
end of program der1a

start of program rwr  
end of program rwr

start of program der1b

forces (hartrees/bohr) : total

| atom | label | x             | y             | z             |
|------|-------|---------------|---------------|---------------|
| 1    | H1    | 2.101214E-04  | 3.252614E-04  | 5.602618E-04  |
| 2    | C1    | -2.300805E-04 | -1.371761E-04 | -5.233361E-04 |
| 3    | C2    | -2.758678E-04 | -1.259649E-04 | -1.035809E-04 |
| 4    | C3    | 9.030691E-05  | 2.294675E-05  | -1.023654E-04 |
| 5    | C4    | 3.771848E-05  | -3.659104E-04 | 9.334880E-05  |
| 6    | C5    | 1.847390E-04  | -3.915992E-04 | 4.778660E-05  |
| 7    | C6    | 3.318597E-04  | 7.579617E-04  | 7.831273E-05  |
| 8    | C7    | -1.377053E-04 | -3.164977E-04 | -3.298678E-04 |
| 9    | H3    | 7.403856E-05  | -1.327962E-04 | 2.040446E-04  |
| 10   | H4    | 1.322487E-05  | 6.775048E-05  | -5.151132E-05 |
| 11   | H6    | -1.457088E-04 | 1.360164E-04  | -1.185368E-04 |
| 12   | H7    | -1.856213E-04 | 2.138309E-04  | -7.383809E-06 |
| 13   | C10   | 1.337306E-04  | 9.025197E-05  | 2.231704E-04  |
| 14   | C8    | -2.534031E-04 | 6.301730E-04  | -6.767065E-04 |
| 15   | C17   | 5.539060E-05  | 4.547507E-04  | -3.759481E-04 |
| 16   | N2    | -7.756083E-04 | -2.084795E-03 | -2.569069E-03 |
| 17   | C9    | -1.673549E-04 | 1.946787E-03  | -7.848075E-04 |
| 18   | C16   | -3.347044E-04 | 7.958961E-04  | 9.146328E-05  |
| 19   | O1    | 7.635698E-04  | -5.583899E-04 | 2.096793E-03  |
| 20   | C11   | -2.447097E-04 | -2.380383E-04 | -4.464844E-04 |
| 21   | C12   | -7.390991E-05 | 9.576713E-04  | 1.112732E-03  |
| 22   | C13   | 9.473616E-04  | 4.939673E-04  | 6.260765E-04  |
| 23   | C14   | -1.208146E-04 | -6.187619E-04 | -9.002393E-04 |
| 24   | C15   | -4.929269E-04 | -2.872204E-04 | -6.120755E-04 |
| 25   | H19   | -1.437939E-04 | -4.831191E-05 | -4.317223E-05 |
| 26   | H20   | -1.643894E-04 | 9.753956E-05  | 2.895091E-04  |
| 27   | H21   | 7.566510E-05  | -4.757896E-05 | 3.286946E-05  |
| 28   | H22   | 8.691339E-05  | -1.901553E-04 | -2.361522E-04 |
| 29   | H23   | 3.272189E-05  | 2.281349E-05  | 6.202587E-05  |
| 30   | H27   | 8.661891E-05  | 4.097314E-05  | -5.582268E-05 |
| 31   | H29   | -4.043995E-05 | -3.213326E-04 | -1.993664E-04 |
| 32   | H30   | 1.625190E-04  | -7.381874E-05 | -3.783268E-05 |

|       |       |               |               |               |
|-------|-------|---------------|---------------|---------------|
| 33    | H15   | -2.602321E-04 | -2.659915E-04 | 4.036648E-04  |
| 34    | H2    | -8.311658E-05 | -1.390267E-04 | -1.896087E-04 |
| 35    | H5    | 1.011353E-03  | -9.841210E-04 | 1.071648E-03  |
| 36    | H8    | -1.043646E-04 | 4.358583E-04  | 6.762420E-04  |
| ----- |       | -----         | -----         | -----         |
|       | total | 6.310076E-05  | 1.629635E-04  | -6.939178E-04 |

end of program derlb

start of program geopt 8

geometry optimization step 8

reading input hessian of dimension 108  
in five columns format

reading input hessian of dimension 108  
in five columns format

reading input hessian of dimension 108  
in five columns format

energy change: 8.1217E-05 . ( 5.0000E-05 )

gradient maximum: 2.1973E-03 . ( 4.5000E-04 )

gradient rms: 5.3128E-04 . ( 3.0000E-04 )

step size: 0.03582 trust radius: 0.30000

displacement maximum: 1.1907E-02 . ( 1.8000E-03 )

displacement rms: 3.2433E-03 . ( 1.2000E-03 )

predicted energy change: -4.0291E-05 geom step: 3.5823E-

02 full step: 3.5823E-02

molecular structure not yet converged...

center of mass moved by:

x: -5.7836E-04 y: 2.0927E-03 z: 1.2391E-03

new geometry:

| atom | angstroms     |               |               |
|------|---------------|---------------|---------------|
|      | x             | y             | z             |
| H1   | -0.2661560888 | 1.3331181465  | -2.0592768257 |
| C1   | -0.1688073376 | 1.7714178806  | -1.0848911740 |
| C2   | 0.1143739422  | 2.9147078779  | 1.4044897936  |
| C3   | 0.2272977558  | 0.9738175048  | -0.0251374608 |
| C4   | -0.4337196300 | 3.1232573021  | -0.9199784241 |
| C5   | -0.2988960811 | 3.6877702357  | 0.3305023053  |
| C6   | 0.3928263088  | 1.5646040078  | 1.2352954695  |
| C7   | 0.5797554837  | -0.4999509524 | -0.1540293601 |
| H3   | -0.7406612437 | 3.7183614091  | -1.7608638594 |
| H4   | -0.5091848545 | 4.7318055939  | 0.4838010268  |
| H6   | 0.2158197527  | 3.3730701323  | 2.3681071347  |
| H7   | 1.6682970562  | -0.5447620847 | -0.1784553386 |
| C10  | 0.0985884297  | -1.2168041457 | -1.4072442682 |
| C8   | 0.1718787321  | -1.2423138226 | 1.1377432425  |
| C17  | -1.3365676819 | -1.3846851741 | 1.3934833880  |

|     |               |               |               |
|-----|---------------|---------------|---------------|
| N2  | 0.8785477159  | 0.7969033882  | 2.3181769784  |
| C9  | 0.7948216579  | -0.5707137946 | 2.3456213054  |
| C16 | 1.4124179402  | 1.4673748932  | 3.4946549640  |
| O1  | 1.1635892976  | -1.2122542184 | 3.2907615742  |
| C11 | -0.7205226671 | -2.6649489011 | -3.6619320187 |
| C12 | 0.9903614373  | -2.0221429836 | -2.1058923427 |
| C13 | -1.2162259344 | -1.1460379930 | -1.8649917194 |
| C14 | -1.6210652361 | -1.8613780895 | -2.9791304426 |
| C15 | 0.5882779616  | -2.7421286267 | -3.2212669740 |
| H19 | 2.0129316468  | -2.0906512795 | -1.7756748879 |
| H20 | -1.9277240292 | -0.5220337161 | -1.3552657341 |
| H21 | -2.6413019272 | -1.7895485874 | -3.3138270318 |
| H22 | 1.2997733947  | -3.3587823764 | -3.7422741539 |
| H23 | -1.0367111890 | -3.2203555075 | -4.5272697522 |
| H27 | -1.8419199812 | -0.4247253003 | 1.3852798838  |
| H29 | -1.7931442443 | -2.0181624588 | 0.6450319614  |
| H30 | 0.6044222355  | -2.2354397781 | 1.1168926004  |
| H15 | -1.4935666450 | -1.8439940263 | 2.3626064099  |
| H2  | 2.0961198120  | 2.2501736707  | 3.1892934940  |
| H5  | 1.9360089494  | 0.7399702901  | 4.0883031565  |
| H8  | 0.6214226158  | 1.9026675566  | 4.0962522762  |

nuclear repulsion energy..... 1397.460839396 hartrees

-----  
 / end of geometry optimization iteration 8 /  
 -----

end of program geopt

start of program onee  
 smallest eigenvalue of S: 3.350E-04  
 number of canonical orbitals..... 368  
 end of program onee

start of program probe  
 end of program probe

start of program grid

number of gridpoints:

| atom     | H1  | C1  | C2  | C3  | C4  | C5  | C6  |
|----------|-----|-----|-----|-----|-----|-----|-----|
| C7       |     |     |     |     |     |     |     |
| grid # 1 | 71  | 88  | 89  | 88  | 89  | 87  | 86  |
| 81       |     |     |     |     |     |     |     |
| grid # 2 | 115 | 96  | 95  | 97  | 97  | 97  | 93  |
| 90       |     |     |     |     |     |     |     |
| grid # 3 | 210 | 184 | 182 | 192 | 182 | 183 | 194 |
| 176      |     |     |     |     |     |     |     |

grid # 4      208      327      326      340      327      327      328  
312

number of gridpoints:

atom      H3      H4      H6      H7      C10      C8      C17  
N2

grid # 1      73      73      70      67      92      81      74  
94

grid # 2      118      118      112      106      100      90      80  
104

grid # 3      223      223      207      207      196      174      149  
210

grid # 4      224      223      206      204      341      315      286  
390

number of gridpoints:

atom      C9      C16      O1      C11      C12      C13      C14  
C15

grid # 1      81      69      110      89      88      87      89  
89

grid # 2      90      79      122      97      95      95      95  
97

grid # 3      176      145      260      184      182      182      183  
184

grid # 4      293      276      456      328      326      325      326  
328

number of gridpoints:

atom      H19      H20      H21      H22      H23      H27      H29  
H30

grid # 1      72      69      73      73      73      72      71  
69

grid # 2      112      112      118      118      118      109      109  
109

grid # 3      214      209      223      223      224      215      210  
214

grid # 4      213      205      223      223      224      212      207  
208

number of gridpoints:

| atom     | H15 | H2  | H5  | H8  | total |
|----------|-----|-----|-----|-----|-------|
| grid # 1 | 71  | 71  | 70  | 71  | 2860  |
| grid # 2 | 110 | 111 | 106 | 111 | 3721  |
| grid # 3 | 219 | 216 | 213 | 216 | 7184  |
| grid # 4 | 218 | 213 | 209 | 216 | 9913  |

end of program grid

start of program rwr

end of program rwr



start of program scf

|      | i | u | d | i | g |                  | RMS     | maximum |
|------|---|---|---|---|---|------------------|---------|---------|
|      | t | p | i | c | r |                  | energy  | DIIS    |
|      | e | d | i | u | i | total energy     | density | error   |
|      | r | t | s | t | d |                  | change  |         |
| etot | 1 | N | N | 1 | U | -783.03005480403 | 4.6E-05 | 1.3E-03 |
| etot | 2 | Y | Y | 4 | M | -783.03039517462 | 3.4E-04 | 3.9E-04 |
| etot | 3 | Y | Y | 4 | M | -783.03043955592 | 4.4E-05 | 9.5E-05 |
| etot | 4 | Y | Y | 4 | M | -783.03044228228 | 2.7E-06 | 3.6E-05 |
| etot | 5 | Y | N | 4 | M | -783.03044272633 | 4.4E-07 | 0.0E+00 |

Energy components, in hartrees:

|     |                               |                   |       |
|-----|-------------------------------|-------------------|-------|
| (A) | Nuclear repulsion.....        | 1397.46083939577  |       |
| (E) | Total one-electron terms..... | -3839.28878476771 |       |
| (I) | Total two-electron terms..... | 1658.79750264561  |       |
| (L) | Electronic energy.....        | -2180.49128212210 | (E+I) |
| (N) | Total energy.....             | -783.03044272633  | (A+L) |

SCFE: SCF energy: HF -783.03044272633 hartrees iterations:  
5

HOMO energy: -0.30123  
LUMO energy: 0.12995

Orbital energies:

|           |           |           |           |           |           |
|-----------|-----------|-----------|-----------|-----------|-----------|
| -20.52401 | -15.60160 | -11.34415 | -11.28568 | -11.25515 | -11.25129 |
| -11.24498 | -11.24336 | -11.24082 | -11.23697 | -11.23606 | -11.23551 |
| -11.23469 | -11.23408 | -11.23365 | -11.23334 | -11.23309 | -11.22804 |
| -11.21915 | -1.39500  | -1.26917  | -1.16862  | -1.14927  | -1.10766  |
| -1.03286  | -1.02101  | -1.01916  | -1.01568  | -0.95828  | -0.94002  |
| -0.85726  | -0.84775  | -0.83285  | -0.82945  | -0.78984  | -0.74196  |
| -0.71172  | -0.69822  | -0.66992  | -0.66196  | -0.64810  | -0.63532  |
| -0.63395  | -0.61757  | -0.61106  | -0.60143  | -0.60093  | -0.58699  |
| -0.57735  | -0.56659  | -0.55189  | -0.54714  | -0.52472  | -0.52149  |
| -0.51787  | -0.51197  | -0.50444  | -0.49279  | -0.48264  | -0.47670  |
| -0.46695  | -0.41981  | -0.40856  | -0.34103  | -0.33682  | -0.32824  |
| -0.30123  | 0.12995   | 0.13534   | 0.14003   | 0.14916   | 0.20708   |
| 0.23326   | 0.24137   | 0.25581   | 0.26422   | 0.26839   |           |

end of program scf

start of program derla  
end of program derla

start of program rwr

end of program rwr

start of program der1b

forces (hartrees/bohr) : total

| atom  | label | x             | y             | z             |
|-------|-------|---------------|---------------|---------------|
| 1     | H1    | -1.140719E-04 | -6.499710E-05 | -4.130554E-04 |
| 2     | C1    | -2.851578E-05 | -4.050072E-04 | -1.286143E-04 |
| 3     | C2    | 9.295780E-06  | 1.684741E-04  | 2.062980E-04  |
| 4     | C3    | -9.064331E-06 | -2.174090E-04 | -3.464953E-05 |
| 5     | C4    | -8.561083E-05 | 3.278602E-05  | -4.057126E-04 |
| 6     | C5    | -2.134558E-05 | 5.879712E-04  | 5.337846E-04  |
| 7     | C6    | 3.101503E-04  | -2.331394E-06 | -1.435943E-05 |
| 8     | C7    | 1.535559E-04  | 2.003033E-04  | 1.097061E-04  |
| 9     | H3    | -4.593092E-05 | 7.668884E-05  | -2.478549E-04 |
| 10    | H4    | 2.771560E-05  | -1.075377E-04 | -9.184986E-06 |
| 11    | H6    | 4.185435E-05  | 1.408314E-04  | 2.233013E-04  |
| 12    | H7    | -9.688335E-06 | 1.087746E-06  | -6.279909E-05 |
| 13    | C10   | 1.681820E-04  | -5.778707E-05 | -2.853702E-05 |
| 14    | C8    | 9.019550E-07  | -2.167687E-04 | 2.607292E-04  |
| 15    | C17   | 1.122140E-05  | -1.285885E-04 | -2.406471E-04 |
| 16    | N2    | -2.639286E-04 | -2.339978E-04 | -3.244891E-04 |
| 17    | C9    | 3.247545E-04  | -2.949153E-04 | 5.711815E-04  |
| 18    | C16   | 3.927602E-04  | 1.061726E-03  | -3.868351E-04 |
| 19    | O1    | -2.574556E-04 | -7.308353E-05 | -5.410925E-04 |
| 20    | C11   | -3.185205E-04 | -4.440273E-05 | -2.260312E-04 |
| 21    | C12   | 2.482342E-04  | -1.201203E-04 | -5.156046E-05 |
| 22    | C13   | -4.250885E-04 | 1.552174E-04  | -7.201405E-05 |
| 23    | C14   | -3.416585E-04 | 2.508047E-04  | 1.510462E-04  |
| 24    | C15   | 6.219917E-04  | -1.219123E-04 | 1.325961E-04  |
| 25    | H19   | 2.639330E-05  | -3.705209E-06 | -3.293485E-05 |
| 26    | H20   | 1.417312E-04  | -2.163832E-04 | -1.403268E-04 |
| 27    | H21   | 3.022227E-05  | -1.428976E-05 | -1.563539E-05 |
| 28    | H22   | -5.346949E-05 | 8.191457E-05  | 2.455726E-06  |
| 29    | H23   | -1.566653E-05 | 2.710134E-05  | -2.446166E-05 |
| 30    | H27   | -1.150750E-04 | 2.778667E-04  | -4.094068E-05 |
| 31    | H29   | -1.847337E-04 | -1.529253E-04 | -1.316522E-04 |
| 32    | H30   | -8.930115E-05 | 1.707525E-04  | -4.601085E-05 |
| 33    | H15   | 5.792980E-05  | -9.170692E-05 | 1.736207E-04  |
| 34    | H2    | -2.270907E-04 | -1.396650E-04 | 1.421172E-04  |
| 35    | H5    | 3.937866E-04  | -5.005298E-04 | 1.826675E-04  |
| 36    | H8    | -2.948098E-04 | 1.257423E-04  | 2.844157E-04  |
| total |       | 5.965533E-05  | 1.512038E-04  | -6.454795E-04 |

end of program der1b

start of program geopt 9

geometry optimization step 9  
reading input hessian of dimension 108  
in five columns format  
reading input hessian of dimension 108  
in five columns format  
reading input hessian of dimension 108  
in five columns format

energy change: -3.0061E-05 \* ( 5.0000E-05 )  
gradient maximum: 9.0408E-04 . ( 4.5000E-04 )  
gradient rms: 2.4230E-04 \* ( 3.0000E-04 )  
step size: 0.02715 trust radius: 0.30000  
displacement maximum: 1.2180E-02 . ( 1.8000E-03 )  
displacement rms: 2.4579E-03 . ( 1.2000E-03 )  
predicted energy change: -1.6126E-05 geom step: 2.7148E-  
02 full step: 2.7148E-02  
molecular structure not yet converged...

center of mass moved by:

x: -6.5958E-04 y: -6.2602E-04 z: -2.0780E-06

new geometry:

|      | angstroms     |               |               |
|------|---------------|---------------|---------------|
| atom | x             | y             | z             |
| H1   | -0.2845459323 | 1.3327285376  | -2.0573909308 |
| C1   | -0.1791008872 | 1.7710185966  | -1.0833420858 |
| C2   | 0.1225454738  | 2.9171311114  | 1.4058355007  |
| C3   | 0.2236889338  | 0.9744914765  | -0.0248506210 |
| C4   | -0.4400315388 | 3.1238724854  | -0.9170333148 |
| C5   | -0.2951211177 | 3.6899492554  | 0.3331003911  |
| C6   | 0.3969821060  | 1.5661562567  | 1.2351359488  |
| C7   | 0.5752451540  | -0.4996287496 | -0.1527233951 |
| H3   | -0.7513549306 | 3.7188825381  | -1.7568353852 |
| H4   | -0.5020404945 | 4.7344702084  | 0.4863286551  |
| H6   | 0.2299078119  | 3.3757016952  | 2.3691174654  |
| H7   | 1.6637488241  | -0.5447830002 | -0.1737145261 |
| C10  | 0.0989032950  | -1.2174709565 | -1.4073854817 |
| C8   | 0.1625917402  | -1.2402383746 | 1.1388865746  |
| C17  | -1.3470644543 | -1.3761641938 | 1.3938161122  |
| N2   | 0.8819640704  | 0.7964269836  | 2.3170890667  |
| C9   | 0.7900545487  | -0.5713921018 | 2.3463689878  |
| C16  | 1.4232201306  | 1.4647665998  | 3.4919994935  |
| O1   | 1.1551447010  | -1.2152808126 | 3.2909700228  |
| C11  | -0.7114608759 | -2.6679524120 | -3.6646747001 |
| C12  | 0.9957018191  | -2.0174325861 | -2.1061914853 |
| C13  | -1.2162366752 | -1.1532749195 | -1.8662379779 |
| C14  | -1.6169526257 | -1.8697342124 | -2.9815093851 |
| C15  | 0.5981527328  | -2.7386557135 | -3.2228999547 |
| H19  | 2.0184309175  | -2.0808859242 | -1.7753024949 |
| H20  | -1.9315851677 | -0.5345993739 | -1.3561507383 |

|     |               |               |               |
|-----|---------------|---------------|---------------|
| H21 | -2.6373787535 | -1.8035444899 | -3.3164776368 |
| H22 | 1.3131853908  | -3.3508233606 | -3.7443086476 |
| H23 | -1.0240737839 | -3.2241848300 | -4.5307086589 |
| H27 | -1.8490136671 | -0.4141691570 | 1.3810350438  |
| H29 | -1.8059030876 | -2.0116903425 | 0.6484031489  |
| H30 | 0.5903930159  | -2.2350250948 | 1.1182690951  |
| H15 | -1.5058138117 | -1.8305676362 | 2.3651251224  |
| H2  | 2.1004048377  | 2.2514094317  | 3.1845141854  |
| H5  | 1.9560113846  | 0.7352964011  | 4.0778796517  |
| H8  | 0.6353235099  | 1.8943286149  | 4.1027977401  |

nuclear repulsion energy..... 1397.070099237 hartrees

-----  
 / end of geometry optimization iteration 9 /  
 -----

end of program geopt

start of program onee  
 smallest eigenvalue of S: 3.367E-04  
 number of canonical orbitals..... 368  
 end of program onee

start of program probe  
 end of program probe

start of program grid

number of gridpoints:

|          | atom | H1  | C1  | C2  | C3  | C4  | C5  | C6  |
|----------|------|-----|-----|-----|-----|-----|-----|-----|
| C7       |      |     |     |     |     |     |     |     |
| grid # 1 |      | 71  | 88  | 89  | 88  | 89  | 87  | 86  |
| 81       |      |     |     |     |     |     |     |     |
| grid # 2 |      | 115 | 96  | 95  | 97  | 97  | 97  | 93  |
| 90       |      |     |     |     |     |     |     |     |
| grid # 3 |      | 210 | 184 | 182 | 192 | 182 | 183 | 190 |
| 176      |      |     |     |     |     |     |     |     |
| grid # 4 |      | 208 | 327 | 326 | 340 | 327 | 327 | 327 |
| 312      |      |     |     |     |     |     |     |     |

number of gridpoints:

|          | atom | H3  | H4  | H6  | H7  | C10 | C8  | C17 |
|----------|------|-----|-----|-----|-----|-----|-----|-----|
| N2       |      |     |     |     |     |     |     |     |
| grid # 1 |      | 73  | 73  | 70  | 67  | 92  | 82  | 74  |
| 94       |      |     |     |     |     |     |     |     |
| grid # 2 |      | 118 | 118 | 112 | 106 | 100 | 90  | 80  |
| 104      |      |     |     |     |     |     |     |     |
| grid # 3 |      | 223 | 223 | 207 | 207 | 196 | 174 | 149 |
| 211      |      |     |     |     |     |     |     |     |

grid # 4      224      223      206      204      341      314      287  
390

number of gridpoints:

| atom     | C9  | C16 | O1  | C11 | C12 | C13 | C14 |
|----------|-----|-----|-----|-----|-----|-----|-----|
| C15      |     |     |     |     |     |     |     |
| grid # 1 | 81  | 71  | 110 | 89  | 88  | 87  | 89  |
| grid # 2 | 91  | 79  | 122 | 97  | 95  | 95  | 95  |
| grid # 3 | 176 | 142 | 260 | 184 | 182 | 182 | 183 |
| grid # 4 | 293 | 273 | 456 | 328 | 326 | 325 | 326 |

number of gridpoints:

| atom     | H19 | H20 | H21 | H22 | H23 | H27 | H29 |
|----------|-----|-----|-----|-----|-----|-----|-----|
| H30      |     |     |     |     |     |     |     |
| grid # 1 | 72  | 69  | 73  | 73  | 73  | 72  | 71  |
| grid # 2 | 112 | 111 | 118 | 118 | 118 | 110 | 109 |
| grid # 3 | 214 | 209 | 223 | 223 | 224 | 215 | 210 |
| grid # 4 | 213 | 205 | 223 | 223 | 224 | 212 | 207 |

number of gridpoints:

| atom     | H15 | H2  | H5  | H8  | total |
|----------|-----|-----|-----|-----|-------|
| grid # 1 | 71  | 71  | 70  | 71  | 2863  |
| grid # 2 | 110 | 111 | 107 | 111 | 3723  |
| grid # 3 | 219 | 215 | 212 | 216 | 7176  |
| grid # 4 | 218 | 213 | 209 | 218 | 9911  |

end of program grid

start of program rwr

end of program rwr

start of program scf

|      | i | u | d | i | g |                  | RMS     | maximum |
|------|---|---|---|---|---|------------------|---------|---------|
|      | t | p | i | c | r |                  | energy  | DIIS    |
|      | e | d | i | u | i | total energy     | density | error   |
|      | r | t | s | t | d |                  | change  |         |
| etot | 1 | N | N | 1 | U | -783.03024646847 | 3.6E-05 | 7.3E-04 |
| etot | 2 | Y | Y | 4 | M | -783.03044494347 | 2.0E-04 | 2.7E-04 |
| etot | 3 | Y | Y | 4 | M | -783.03047014621 | 2.5E-05 | 6.8E-05 |
| etot | 4 | Y | N | 4 | M | -783.03047351487 | 3.4E-06 | 0.0E+00 |

Energy components, in hartrees:

|     |                               |                   |       |
|-----|-------------------------------|-------------------|-------|
| (A) | Nuclear repulsion.....        | 1397.07009923731  |       |
| (E) | Total one-electron terms..... | -3838.50925197305 |       |
| (I) | Total two-electron terms..... | 1658.40867922087  |       |
| (L) | Electronic energy.....        | -2180.10057275218 | (E+I) |
| (N) | Total energy.....             | -783.03047351487  | (A+L) |

SCFE: SCF energy: HF -783.03047351487 hartrees iterations:

4

HOMO energy: -0.30109  
LUMO energy: 0.12987

Orbital energies:

|           |           |           |           |           |           |
|-----------|-----------|-----------|-----------|-----------|-----------|
| -20.52409 | -15.60182 | -11.34430 | -11.28593 | -11.25554 | -11.25118 |
| -11.24500 | -11.24355 | -11.24076 | -11.23722 | -11.23620 | -11.23573 |
| -11.23485 | -11.23421 | -11.23374 | -11.23351 | -11.23335 | -11.22834 |
| -11.21926 | -1.39511  | -1.26909  | -1.16836  | -1.14896  | -1.10744  |
| -1.03264  | -1.02085  | -1.01896  | -1.01563  | -0.95810  | -0.93993  |
| -0.85719  | -0.84761  | -0.83273  | -0.82942  | -0.78970  | -0.74191  |
| -0.71159  | -0.69811  | -0.66977  | -0.66194  | -0.64796  | -0.63535  |
| -0.63374  | -0.61765  | -0.61099  | -0.60143  | -0.60084  | -0.58700  |
| -0.57723  | -0.56654  | -0.55190  | -0.54725  | -0.52461  | -0.52139  |
| -0.51780  | -0.51189  | -0.50437  | -0.49276  | -0.48266  | -0.47660  |
| -0.46691  | -0.41982  | -0.40854  | -0.34091  | -0.33677  | -0.32831  |
| -0.30109  | 0.12987   | 0.13524   | 0.14002   | 0.14898   | 0.20694   |
| 0.23321   | 0.24147   | 0.25593   | 0.26462   | 0.26840   |           |

end of program scf

start of program derla  
end of program derla

start of program rwr  
end of program rwr

start of program derlb

forces (hartrees/bohr) : total

| atom | label | x             | y             | z             |
|------|-------|---------------|---------------|---------------|
| 1    | H1    | 4.306824E-05  | -3.811675E-05 | -5.825168E-05 |
| 2    | C1    | 1.154014E-04  | -1.090558E-05 | 2.597666E-04  |
| 3    | C2    | -2.381388E-05 | -2.507239E-05 | -2.212867E-04 |
| 4    | C3    | 9.454534E-05  | 7.093486E-05  | 2.691954E-04  |

S602

|       |       |               |               |               |
|-------|-------|---------------|---------------|---------------|
| 5     | C4    | 4.834871E-05  | 3.249837E-04  | 4.060106E-04  |
| 6     | C5    | -1.032731E-04 | -1.014322E-04 | -4.532629E-04 |
| 7     | C6    | -2.328858E-04 | -3.086883E-04 | -3.900162E-04 |
| 8     | C7    | -1.462801E-04 | 1.273884E-04  | 1.398661E-04  |
| 9     | H3    | 1.602115E-05  | 2.841850E-05  | 2.775624E-05  |
| 10    | H4    | -2.432367E-05 | 3.481805E-05  | -2.075562E-05 |
| 11    | H6    | -4.323444E-05 | 2.896488E-05  | -1.703978E-05 |
| 12    | H7    | 6.452597E-05  | -3.158282E-05 | 1.821965E-05  |
| 13    | C10   | -7.185283E-05 | -5.402895E-05 | -1.061039E-04 |
| 14    | C8    | -2.362070E-05 | -4.724389E-06 | 1.939075E-05  |
| 15    | C17   | 2.182348E-04  | 1.251015E-04  | -2.401046E-05 |
| 16    | N2    | 1.404209E-04  | -5.991710E-04 | -1.276636E-04 |
| 17    | C9    | -2.381548E-04 | 2.199369E-04  | -1.705079E-04 |
| 18    | C16   | 2.797178E-04  | -2.077793E-04 | 3.107259E-04  |
| 19    | O1    | 3.181108E-06  | 1.856006E-04  | -6.758988E-05 |
| 20    | C11   | 2.096776E-04  | 1.394250E-04  | 2.408279E-04  |
| 21    | C12   | -1.596296E-05 | -2.569227E-04 | -3.510612E-04 |
| 22    | C13   | -1.555350E-04 | -1.672252E-04 | -2.707349E-04 |
| 23    | C14   | 1.964782E-04  | 1.144488E-04  | 2.075390E-04  |
| 24    | C15   | -4.103885E-05 | 1.724779E-04  | 1.811446E-04  |
| 25    | H19   | -1.160934E-05 | -1.327539E-05 | -2.394384E-05 |
| 26    | H20   | 9.037253E-06  | 3.748885E-05  | -2.523035E-05 |
| 27    | H21   | -3.523915E-05 | 4.616328E-05  | -4.226316E-05 |
| 28    | H22   | -4.454817E-05 | 5.171548E-05  | 3.861588E-05  |
| 29    | H23   | -1.309298E-05 | -2.408279E-06 | -4.697281E-05 |
| 30    | H27   | -3.013976E-05 | 8.969003E-05  | -8.863575E-06 |
| 31    | H29   | -7.378555E-05 | -1.168342E-04 | -1.709723E-04 |
| 32    | H30   | 3.576530E-05  | -9.268952E-05 | -4.069871E-05 |
| 33    | H15   | 1.263289E-05  | -5.484992E-05 | 8.593593E-05  |
| 34    | H2    | 1.130454E-04  | 8.140374E-05  | -5.315252E-05 |
| 35    | H5    | -2.243693E-04 | 4.003631E-04  | -2.607665E-04 |
| 36    | H8    | 7.983436E-06  | -8.861580E-05 | 1.016309E-04  |
| ----- |       | -----         | -----         | -----         |
|       | total | 5.532520E-05  | 1.050009E-04  | -6.445230E-04 |

end of program der1b

start of program geopt 10

geometry optimization step 10

reading input hessian of dimension 108

in five columns format

reading input hessian of dimension 108

in five columns format

reading input hessian of dimension 108

in five columns format

energy change: -3.0789E-05 \* ( 5.0000E-05 )

gradient maximum: 6.1013E-04 . ( 4.5000E-04 )

S603

gradient rms: 1.6032E-04 \* ( 3.0000E-04 )  
 step size: 0.01877 trust radius: 0.30000  
 displacement maximum: 9.6422E-03 . ( 1.8000E-03 )  
 displacement rms: 1.6998E-03 . ( 1.2000E-03 )  
 predicted energy change: -6.8349E-06 geom step: 1.8774E-02  
 02 full step: 1.8774E-02  
 molecular structure not yet converged...

center of mass moved by:

x: -1.2012E-03 y: -1.4607E-04 z: 8.2086E-04

new geometry:

|      | angstroms     |               |               |
|------|---------------|---------------|---------------|
| atom | x             | y             | z             |
| H1   | -0.2801543114 | 1.3334031349  | -2.0579415504 |
| C1   | -0.1773871749 | 1.7709961548  | -1.0832454970 |
| C2   | 0.1183331768  | 2.9157085117  | 1.4061249142  |
| C3   | 0.2242652863  | 0.9738403944  | -0.0248605939 |
| C4   | -0.4408983669 | 3.1237910147  | -0.9165815708 |
| C5   | -0.2998914169 | 3.6890991827  | 0.3337062967  |
| C6   | 0.3958946367  | 1.5651902243  | 1.2347353089  |
| C7   | 0.5753391405  | -0.5003085386 | -0.1517533413 |
| H3   | -0.7518253429 | 3.7188308819  | -1.7565228357 |
| H4   | -0.5097039619 | 4.7329266499  | 0.4875830200  |
| H6   | 0.2233746455  | 3.3733273418  | 2.3701328921  |
| H7   | 1.6639408297  | -0.5462687834 | -0.1714735003 |
| C10  | 0.0998016674  | -1.2181940707 | -1.4068119488 |
| C8   | 0.1609701441  | -1.2406582233 | 1.1395300575  |
| C17  | -1.3487745999 | -1.3762300464 | 1.3926738477  |
| N2   | 0.8836146097  | 0.7959701849  | 2.3160845117  |
| C9   | 0.7873338416  | -0.5713047834 | 2.3470856196  |
| C16  | 1.4317218732  | 1.4658409070  | 3.4869806224  |
| O1   | 1.1490238845  | -1.2143882872 | 3.2936240933  |
| C11  | -0.7087473416 | -2.6658374689 | -3.6648149368 |
| C12  | 0.9963301689  | -2.0205698466 | -2.1032878318 |
| C13  | -1.2143015298 | -1.1508741226 | -1.8679620183 |
| C14  | -1.6140131067 | -1.8656875482 | -2.9838323267 |
| C15  | 0.5994372277  | -2.7402921776 | -3.2203892798 |
| H19  | 2.0179962640  | -2.0866416941 | -1.7700863618 |
| H20  | -1.9289457993 | -0.5304540149 | -1.3592368761 |
| H21  | -2.6333247730 | -1.7966137199 | -3.3216034819 |
| H22  | 1.3136726773  | -3.3541738717 | -3.7403794318 |
| H23  | -1.0208274086 | -3.2208277852 | -4.5319016378 |
| H27  | -1.8502918483 | -0.4137753301 | 1.3818308739  |
| H29  | -1.8077854758 | -2.0100637773 | 0.6456422032  |
| H30  | 0.5887680650  | -2.2355639401 | 1.1195584936  |
| H15  | -1.5079703611 | -1.8326702903 | 2.3630581178  |
| H2   | 2.1019451466  | 2.2563966645  | 3.1749556526  |
| H5   | 1.9731916045  | 0.7384401749  | 4.0668056839  |
| H8   | 0.6466945871  | 1.8895516239  | 4.1058699479  |

nuclear repulsion energy..... 1397.194479648 hartrees

S604



-----  
/ end of geometry optimization iteration 10 /  
-----

end of program geopt

start of program onee  
smallest eigenvalue of S: 3.365E-04  
number of canonical orbitals..... 368  
end of program onee

start of program probe  
end of program probe

start of program grid

number of gridpoints:

| atom     | H1  | C1  | C2  | C3  | C4  | C5  | C6  |
|----------|-----|-----|-----|-----|-----|-----|-----|
| C7       |     |     |     |     |     |     |     |
| grid # 1 | 71  | 88  | 89  | 88  | 89  | 87  | 86  |
| 81       |     |     |     |     |     |     |     |
| grid # 2 | 115 | 96  | 95  | 97  | 97  | 97  | 93  |
| 90       |     |     |     |     |     |     |     |
| grid # 3 | 210 | 184 | 182 | 192 | 182 | 183 | 194 |
| 176      |     |     |     |     |     |     |     |
| grid # 4 | 208 | 327 | 327 | 340 | 327 | 327 | 328 |
| 312      |     |     |     |     |     |     |     |

number of gridpoints:

| atom     | H3  | H4  | H6  | H7  | C10 | C8  | C17 |
|----------|-----|-----|-----|-----|-----|-----|-----|
| N2       |     |     |     |     |     |     |     |
| grid # 1 | 73  | 73  | 70  | 67  | 92  | 82  | 74  |
| 94       |     |     |     |     |     |     |     |
| grid # 2 | 118 | 118 | 112 | 106 | 100 | 90  | 80  |
| 104      |     |     |     |     |     |     |     |
| grid # 3 | 223 | 223 | 207 | 207 | 196 | 174 | 149 |
| 210      |     |     |     |     |     |     |     |
| grid # 4 | 224 | 223 | 206 | 204 | 341 | 313 | 287 |
| 390      |     |     |     |     |     |     |     |

number of gridpoints:

| atom     | C9  | C16 | O1  | C11 | C12 | C13 | C14 |
|----------|-----|-----|-----|-----|-----|-----|-----|
| C15      |     |     |     |     |     |     |     |
| grid # 1 | 81  | 71  | 110 | 89  | 88  | 87  | 89  |
| 89       |     |     |     |     |     |     |     |
| grid # 2 | 91  | 79  | 122 | 97  | 95  | 95  | 95  |
| 97       |     |     |     |     |     |     |     |
| grid # 3 | 176 | 140 | 260 | 184 | 183 | 182 | 183 |
| 184      |     |     |     |     |     |     |     |

grid # 4      293      271      456      328      326      325      326  
328

number of gridpoints:

| atom     | H19 | H20 | H21 | H22 | H23 | H27 | H29 |
|----------|-----|-----|-----|-----|-----|-----|-----|
| H30      |     |     |     |     |     |     |     |
| grid # 1 | 72  | 69  | 73  | 73  | 73  | 72  | 71  |
| 69       |     |     |     |     |     |     |     |
| grid # 2 | 112 | 111 | 118 | 118 | 118 | 109 | 109 |
| 109      |     |     |     |     |     |     |     |
| grid # 3 | 214 | 209 | 223 | 223 | 224 | 215 | 210 |
| 214      |     |     |     |     |     |     |     |
| grid # 4 | 213 | 205 | 223 | 223 | 224 | 212 | 207 |
| 208      |     |     |     |     |     |     |     |

number of gridpoints:

| atom     | H15 | H2  | H5  | H8  | total |
|----------|-----|-----|-----|-----|-------|
| grid # 1 | 71  | 71  | 70  | 71  | 2863  |
| grid # 2 | 110 | 111 | 108 | 111 | 3723  |
| grid # 3 | 219 | 215 | 212 | 216 | 7178  |
| grid # 4 | 218 | 213 | 209 | 218 | 9910  |

end of program grid

start of program rwr

end of program rwr

start of program scf

|      | i | u | d | i | g |                  | RMS     | maximum |
|------|---|---|---|---|---|------------------|---------|---------|
|      | t | p | i | c | r |                  | energy  | DIIS    |
|      | e | d | i | u | i | total energy     | density | error   |
|      | r | t | s | t | d | change           | change  |         |
| etot | 1 | N | N | 1 | U | -783.03038833871 | 2.8E-05 | 5.9E-04 |
| etot | 2 | Y | Y | 4 | M | -783.03046554246 | 7.7E-05 | 1.9E-04 |
| etot | 3 | Y | Y | 4 | M | -783.03047618726 | 1.1E-05 | 4.4E-05 |
| etot | 4 | Y | N | 4 | M | -783.03047632766 | 1.4E-07 | 0.0E+00 |

Energy components, in hartrees:

|     |                               |                   |       |
|-----|-------------------------------|-------------------|-------|
| (A) | Nuclear repulsion.....        | 1397.19447964800  |       |
| (E) | Total one-electron terms..... | -3838.76211632937 |       |
| (I) | Total two-electron terms..... | 1658.53716035371  |       |
| (L) | Electronic energy.....        | -2180.22495597566 | (E+I) |
| (N) | Total energy.....             | -783.03047632766  | (A+L) |

SCFE: SCF energy: HF      -783.03047632766 hartrees      iterations:

4

HOMO energy: -0.30118  
LUMO energy: 0.12992

Orbital energies:

|           |           |           |           |           |           |
|-----------|-----------|-----------|-----------|-----------|-----------|
| -20.52437 | -15.60145 | -11.34407 | -11.28562 | -11.25549 | -11.25121 |
| -11.24504 | -11.24339 | -11.24074 | -11.23716 | -11.23605 | -11.23550 |
| -11.23494 | -11.23403 | -11.23364 | -11.23340 | -11.23334 | -11.22831 |
| -11.21925 | -1.39505  | -1.26893  | -1.16844  | -1.14899  | -1.10746  |
| -1.03264  | -1.02094  | -1.01903  | -1.01553  | -0.95810  | -0.93990  |
| -0.85720  | -0.84745  | -0.83282  | -0.82939  | -0.78974  | -0.74183  |
| -0.71160  | -0.69815  | -0.66970  | -0.66198  | -0.64792  | -0.63529  |
| -0.63380  | -0.61757  | -0.61093  | -0.60134  | -0.60085  | -0.58715  |
| -0.57719  | -0.56654  | -0.55176  | -0.54747  | -0.52450  | -0.52137  |
| -0.51774  | -0.51184  | -0.50443  | -0.49277  | -0.48258  | -0.47663  |
| -0.46696  | -0.41962  | -0.40859  | -0.34095  | -0.33683  | -0.32821  |
| -0.30118  | 0.12992   | 0.13539   | 0.14006   | 0.14902   | 0.20690   |
| 0.23325   | 0.24135   | 0.25589   | 0.26424   | 0.26844   |           |

end of program scf

start of program derla  
end of program derla

start of program rwr  
end of program rwr

start of program derlb

forces (hartrees/bohr) : total

| atom | label | x             | y             | z             |
|------|-------|---------------|---------------|---------------|
| 1    | H1    | -3.512119E-05 | -7.246920E-06 | 1.220435E-05  |
| 2    | C1    | -6.548342E-05 | 2.609361E-04  | 1.161988E-05  |
| 3    | C2    | -2.424057E-05 | -7.665663E-05 | -1.612234E-04 |
| 4    | C3    | -1.799699E-05 | 5.606370E-05  | -1.016539E-04 |
| 5    | C4    | 2.362726E-05  | -2.397678E-04 | -1.116338E-04 |
| 6    | C5    | 1.206175E-04  | -2.094980E-04 | 1.366455E-04  |
| 7    | C6    | -5.770954E-05 | 2.534923E-04  | 1.086819E-04  |
| 8    | C7    | 1.516521E-05  | -7.941797E-05 | -7.151312E-05 |
| 9    | H3    | 2.135461E-05  | -4.442957E-05 | 9.021892E-06  |
| 10   | H4    | 2.587308E-05  | 2.607905E-05  | 6.297830E-06  |
| 11   | H6    | 3.342028E-06  | 1.970645E-05  | -6.520183E-06 |
| 12   | H7    | -2.218596E-05 | 3.905096E-06  | 1.303655E-05  |
| 13   | C10   | 7.462964E-05  | 4.586939E-05  | 9.724657E-05  |
| 14   | C8    | -5.899785E-05 | 1.013763E-04  | -1.928770E-04 |
| 15   | C17   | 2.495023E-05  | 5.634245E-05  | 3.962970E-05  |
| 16   | N2    | 1.293758E-05  | -5.234874E-05 | -6.473087E-04 |

S607

|       |       |               |               |               |
|-------|-------|---------------|---------------|---------------|
| 17    | C9    | -3.117297E-05 | 7.077924E-05  | 5.248981E-04  |
| 18    | C16   | -1.426884E-04 | -4.703364E-04 | 4.721695E-04  |
| 19    | O1    | 9.020199E-05  | 1.939353E-04  | -1.792002E-04 |
| 20    | C11   | -1.303666E-04 | -2.800319E-05 | -1.342712E-04 |
| 21    | C12   | -3.136288E-05 | 1.545941E-04  | 1.150223E-04  |
| 22    | C13   | 8.039724E-05  | 7.889090E-05  | 1.099894E-04  |
| 23    | C14   | -5.661729E-05 | -1.273047E-04 | -1.679750E-04 |
| 24    | C15   | -3.412673E-05 | -4.641936E-05 | -1.093122E-04 |
| 25    | H19   | 7.235128E-05  | 3.372425E-05  | -7.624453E-06 |
| 26    | H20   | -2.998671E-05 | 3.856401E-05  | 1.677321E-05  |
| 27    | H21   | -2.573116E-05 | -2.035721E-05 | -1.544941E-05 |
| 28    | H22   | 7.803951E-05  | -3.806013E-05 | -7.179592E-05 |
| 29    | H23   | 7.255008E-06  | -5.960961E-06 | -1.590225E-05 |
| 30    | H27   | 2.668901E-05  | -2.638931E-05 | -3.123892E-05 |
| 31    | H29   | 1.934055E-05  | -2.333623E-05 | -6.392963E-05 |
| 32    | H30   | 3.277204E-06  | 3.448445E-06  | -1.458692E-05 |
| 33    | H15   | -3.669980E-05 | -2.993639E-06 | 1.828401E-05  |
| 34    | H2    | 7.682034E-05  | 7.300693E-05  | -1.580492E-04 |
| 35    | H5    | -7.127518E-05 | 1.969056E-04  | -3.648505E-05 |
| 36    | H8    | 1.573509E-04  | -4.120966E-05 | 2.512862E-05  |
| ----- |       | -----         | -----         | -----         |
|       | total | 6.245689E-05  | 1.278832E-04  | -5.819011E-04 |

end of program derlb

start of program geopt 11

geometry optimization step 11

reading input hessian of dimension 108

in five columns format

reading input hessian of dimension 108

in five columns format

reading input hessian of dimension 108

in five columns format

energy change: -2.8128E-06 \* ( 5.0000E-05 )

gradient maximum: 7.7316E-04 . ( 4.5000E-04 )

gradient rms: 1.3555E-04 \* ( 3.0000E-04 )

step size: 0.01100 trust radius: 0.30000

displacement maximum: 5.1788E-03 . ( 1.8000E-03 )

displacement rms: 9.9554E-04 \* ( 1.2000E-03 )

predicted energy change: -2.9763E-06 geom step: 1.0996E-

02 full step: 1.0996E-02

molecular structure not yet converged...

center of mass moved by:

x: -4.5574E-04 y: -1.0654E-04 z: 7.8232E-05

new geometry:

angstroms

S608

| atom | x             | y             | z             |
|------|---------------|---------------|---------------|
| H1   | -0.2843289727 | 1.3317189557  | -2.0568729495 |
| C1   | -0.1792387241 | 1.7701933000  | -1.0827450722 |
| C2   | 0.1206764819  | 2.9158366153  | 1.4054453447  |
| C3   | 0.2229868296  | 0.9734199978  | -0.0245926193 |
| C4   | -0.4403319880 | 3.1232905190  | -0.9165869976 |
| C5   | -0.2970107617 | 3.6890672896  | 0.3330965817  |
| C6   | 0.3962817155  | 1.5651603773  | 1.2344677208  |
| C7   | 0.5733491443  | -0.5009564457 | -0.1506574137 |
| H3   | -0.7511030611 | 3.7182273727  | -1.7564691967 |
| H4   | -0.5046792615 | 4.7334138532  | 0.4866416998  |
| H6   | 0.2270802107  | 3.3737910064  | 2.3691650567  |
| H7   | 1.6620016195  | -0.5475384785 | -0.1687967207 |
| C10  | 0.0993127442  | -1.2186173517 | -1.4064030227 |
| C8   | 0.1577952251  | -1.2404147689 | 1.1407182957  |
| C17  | -1.3519476873 | -1.3743776161 | 1.3940433078  |
| N2   | 0.8848395004  | 0.7957366112  | 2.3150219486  |
| C9   | 0.7850523487  | -0.5710000336 | 2.3480024134  |
| C16  | 1.4343437848  | 1.4645203079  | 3.4859459816  |
| O1   | 1.1458934467  | -1.2134966867 | 3.2951502278  |
| C11  | -0.7060326725 | -2.6657445392 | -3.6660517259 |
| C12  | 0.9981694769  | -2.0167225983 | -2.1049050565 |
| C13  | -1.2153435861 | -1.1545897420 | -1.8669724021 |
| C14  | -1.6135006268 | -1.8694794897 | -2.9834556136 |
| C15  | 0.6028759367  | -2.7362018523 | -3.2227403487 |
| H19  | 2.0204887773  | -2.0793053919 | -1.7726969516 |
| H20  | -1.9314777646 | -0.5365077904 | -1.3574488212 |
| H21  | -2.6332735899 | -1.8033326856 | -3.3205317681 |
| H22  | 1.3190145421  | -3.3467214040 | -3.7441591024 |
| H23  | -1.0168442783 | -3.2207620646 | -4.5336062478 |
| H27  | -1.8527613926 | -0.4116203612 | 1.3810790398  |
| H29  | -1.8112046867 | -2.0095505426 | 0.6480486027  |
| H30  | 0.5846336660  | -2.2357752810 | 1.1212978228  |
| H15  | -1.5118139158 | -1.8287762158 | 2.3653913084  |
| H2   | 2.1030823104  | 2.2562734416  | 3.1726770859  |
| H5   | 1.9780017886  | 0.7381231964  | 4.0641617571  |
| H8   | 0.6505022089  | 1.8866629125  | 4.1071446409  |

nuclear repulsion energy..... 1397.203718552 hartrees

-----  
 / end of geometry optimization iteration 11 /  
 -----

end of program geopt

start of program onee

smallest eigenvalue of S: 3.362E-04

number of canonical orbitals..... 368

end of program onee

start of program probe  
end of program probe

start of program grid

number of gridpoints:

| atom     | H1  | C1  | C2  | C3  | C4  | C5  | C6  |
|----------|-----|-----|-----|-----|-----|-----|-----|
| C7       |     |     |     |     |     |     |     |
| grid # 1 | 71  | 88  | 89  | 88  | 89  | 87  | 86  |
| 81       |     |     |     |     |     |     |     |
| grid # 2 | 115 | 96  | 95  | 97  | 97  | 97  | 93  |
| 90       |     |     |     |     |     |     |     |
| grid # 3 | 210 | 184 | 182 | 192 | 182 | 183 | 194 |
| 176      |     |     |     |     |     |     |     |
| grid # 4 | 208 | 327 | 326 | 340 | 327 | 327 | 328 |
| 312      |     |     |     |     |     |     |     |

number of gridpoints:

| atom     | H3  | H4  | H6  | H7  | C10 | C8  | C17 |
|----------|-----|-----|-----|-----|-----|-----|-----|
| N2       |     |     |     |     |     |     |     |
| grid # 1 | 73  | 73  | 70  | 67  | 92  | 82  | 73  |
| 94       |     |     |     |     |     |     |     |
| grid # 2 | 118 | 118 | 112 | 106 | 100 | 90  | 80  |
| 104      |     |     |     |     |     |     |     |
| grid # 3 | 223 | 223 | 207 | 207 | 196 | 174 | 147 |
| 210      |     |     |     |     |     |     |     |
| grid # 4 | 224 | 223 | 206 | 204 | 341 | 314 | 287 |
| 390      |     |     |     |     |     |     |     |

number of gridpoints:

| atom     | C9  | C16 | O1  | C11 | C12 | C13 | C14 |
|----------|-----|-----|-----|-----|-----|-----|-----|
| C15      |     |     |     |     |     |     |     |
| grid # 1 | 81  | 71  | 110 | 89  | 88  | 87  | 89  |
| 89       |     |     |     |     |     |     |     |
| grid # 2 | 91  | 79  | 122 | 97  | 95  | 95  | 95  |
| 97       |     |     |     |     |     |     |     |
| grid # 3 | 176 | 142 | 260 | 184 | 183 | 183 | 183 |
| 184      |     |     |     |     |     |     |     |
| grid # 4 | 293 | 272 | 456 | 328 | 326 | 325 | 326 |
| 328      |     |     |     |     |     |     |     |

number of gridpoints:

| atom     | H19 | H20 | H21 | H22 | H23 | H27 | H29 |
|----------|-----|-----|-----|-----|-----|-----|-----|
| H30      |     |     |     |     |     |     |     |
| grid # 1 | 72  | 69  | 73  | 73  | 73  | 72  | 70  |
| 69       |     |     |     |     |     |     |     |
| grid # 2 | 112 | 111 | 118 | 118 | 118 | 110 | 109 |
| 109      |     |     |     |     |     |     |     |
| grid # 3 | 214 | 209 | 223 | 223 | 224 | 215 | 210 |
| 214      |     |     |     |     |     |     |     |

grid # 4        213        205        223        223        224        212        207  
208

number of gridpoints:

| atom     | H15 | H2  | H5  | H8  | total |
|----------|-----|-----|-----|-----|-------|
| grid # 1 | 71  | 71  | 70  | 71  | 2861  |
| grid # 2 | 110 | 111 | 108 | 111 | 3724  |
| grid # 3 | 219 | 215 | 212 | 216 | 7179  |
| grid # 4 | 218 | 213 | 209 | 218 | 9911  |

end of program grid

start of program rwr

end of program rwr

start of program scf

|      | i | u | d | i | g |                  |          | RMS     | maximum |
|------|---|---|---|---|---|------------------|----------|---------|---------|
|      | t | p | i | c | r |                  |          | density | DIIS    |
|      | e | d | i | u | i | energy           | change   | change  | error   |
|      | r | t | s | t | d | total energy     |          |         |         |
| etot | 1 | N | N | 1 | U | -783.03043154471 |          | 2.2E-05 | 4.7E-04 |
| etot | 2 | Y | Y | 4 | M | -783.03046609900 | 3.5E-05  | 7.1E-06 | 1.7E-04 |
| etot | 3 | Y | Y | 4 | M | -783.03046988043 | 3.8E-06  | 2.0E-06 | 4.4E-05 |
| etot | 4 | Y | N | 4 | M | -783.03046921457 | -6.7E-07 | 0.0E+00 | 0.0E+00 |

Energy components, in hartrees:

|     |                               |                   |       |
|-----|-------------------------------|-------------------|-------|
| (A) | Nuclear repulsion.....        | 1397.20371855239  |       |
| (E) | Total one-electron terms..... | -3838.77789086563 |       |
| (I) | Total two-electron terms..... | 1658.54370309866  |       |
| (L) | Electronic energy.....        | -2180.23418776696 | (E+I) |
| (N) | Total energy.....             | -783.03046921457  | (A+L) |

SCFE: SCF energy: HF        -783.03046921457 hartrees        iterations:  
4

HOMO energy:        -0.30123  
LUMO energy:        0.12991

Orbital energies:

|           |           |           |           |           |           |
|-----------|-----------|-----------|-----------|-----------|-----------|
| -20.52397 | -15.60166 | -11.34416 | -11.28573 | -11.25548 | -11.25124 |
| -11.24501 | -11.24343 | -11.24082 | -11.23705 | -11.23609 | -11.23560 |
| -11.23479 | -11.23409 | -11.23371 | -11.23339 | -11.23331 | -11.22818 |
| -11.21930 | -1.39508  | -1.26910  | -1.16844  | -1.14908  | -1.10751  |
| -1.03268  | -1.02096  | -1.01908  | -1.01560  | -0.95817  | -0.93994  |
| -0.85719  | -0.84753  | -0.83285  | -0.82942  | -0.78975  | -0.74192  |
| -0.71162  | -0.69815  | -0.66969  | -0.66207  | -0.64797  | -0.63530  |

|          |          |          |          |          |          |
|----------|----------|----------|----------|----------|----------|
| -0.63381 | -0.61757 | -0.61096 | -0.60127 | -0.60089 | -0.58716 |
| -0.57720 | -0.56657 | -0.55176 | -0.54753 | -0.52449 | -0.52141 |
| -0.51774 | -0.51191 | -0.50439 | -0.49276 | -0.48256 | -0.47666 |
| -0.46701 | -0.41967 | -0.40853 | -0.34095 | -0.33683 | -0.32826 |
| -0.30123 | 0.12991  | 0.13542  | 0.14007  | 0.14899  | 0.20690  |
| 0.23319  | 0.24138  | 0.25589  | 0.26427  | 0.26844  |          |

end of program scf

start of program derla  
end of program derla

start of program rwr  
end of program rwr

start of program derlb

forces (hartrees/bohr) : total

| atom | label | x             | y             | z             |
|------|-------|---------------|---------------|---------------|
| 1    | H1    | 1.802924E-05  | 5.805059E-05  | -5.077942E-06 |
| 2    | C1    | -5.960102E-05 | 3.324249E-06  | -1.877636E-04 |
| 3    | C2    | 3.019237E-05  | -5.855272E-05 | 1.265697E-04  |
| 4    | C3    | 3.254628E-05  | -5.762696E-05 | 1.905349E-05  |
| 5    | C4    | -2.754577E-05 | -1.275420E-04 | -1.629250E-04 |
| 6    | C5    | -2.928863E-06 | 9.821992E-05  | 6.909518E-05  |
| 7    | C6    | 8.424220E-05  | 1.100294E-04  | 2.494659E-05  |
| 8    | C7    | 5.741945E-05  | -5.679208E-05 | -7.667695E-05 |
| 9    | H3    | -3.089983E-05 | 4.204100E-05  | -8.689056E-05 |
| 10   | H4    | -1.810447E-05 | 1.096620E-05  | -1.748854E-05 |
| 11   | H6    | -4.647679E-06 | 2.245233E-05  | 9.499923E-07  |
| 12   | H7    | -6.181147E-05 | 4.130818E-05  | -3.556904E-05 |
| 13   | C10   | 4.811207E-06  | 4.695883E-05  | 2.265063E-05  |
| 14   | C8    | -3.492065E-06 | 6.211586E-05  | 2.811034E-06  |
| 15   | C17   | -7.034161E-05 | -7.373710E-05 | -2.632369E-05 |
| 16   | N2    | -1.949746E-05 | -1.505710E-04 | -1.775892E-04 |
| 17   | C9    | -1.904806E-07 | 4.626478E-05  | 4.826847E-05  |
| 18   | C16   | 4.128959E-06  | 1.276065E-04  | 7.379912E-05  |
| 19   | O1    | 1.351325E-05  | -1.279618E-05 | -2.769558E-05 |
| 20   | C11   | 1.028080E-06  | -5.370811E-05 | -9.671318E-05 |
| 21   | C12   | -4.066874E-05 | 1.335075E-04  | 1.601364E-04  |
| 22   | C13   | 1.870173E-04  | 5.787544E-05  | 1.029179E-04  |
| 23   | C14   | -2.024104E-05 | -5.409904E-05 | -1.467137E-04 |
| 24   | C15   | -8.992304E-05 | -5.013730E-05 | -1.248842E-04 |
| 25   | H19   | -1.858326E-05 | -2.385863E-05 | -8.764175E-06 |
| 26   | H20   | -2.872420E-05 | 3.644373E-05  | 2.117903E-05  |
| 27   | H21   | -4.763134E-06 | 1.364255E-05  | -2.766448E-05 |
| 28   | H22   | 2.681378E-05  | -5.058570E-05 | -5.285894E-05 |



|       |       |               |               |               |
|-------|-------|---------------|---------------|---------------|
| 29    | H23   | 8.141049E-06  | 7.852019E-06  | -1.009039E-05 |
| 30    | H27   | 3.835170E-06  | -1.418811E-05 | -2.088234E-05 |
| 31    | H29   | 2.308237E-05  | 3.742999E-05  | 2.359027E-05  |
| 32    | H30   | 5.815828E-06  | 2.777707E-07  | -2.336051E-05 |
| 33    | H15   | -1.297210E-05 | 1.502290E-05  | -4.766110E-05 |
| 34    | H2    | -6.307626E-05 | -4.772271E-05 | -7.778354E-07 |
| 35    | H5    | 1.100550E-04  | -1.093342E-04 | 4.771365E-05  |
| 36    | H8    | 2.857553E-05  | 3.425513E-05  | 3.818034E-05  |
| ----- |       |               |               |               |
|       | total | 6.123460E-05  | 6.439293E-05  | -5.825094E-04 |

end of program derlb

start of program geopt 12

geometry optimization step 12

reading input hessian of dimension 108

in five columns format

reading input hessian of dimension 108

in five columns format

energy change: 7.1131E-06 \* ( 5.0000E-05 )  
 gradient maximum: 2.5751E-04 \* ( 4.5000E-04 )  
 gradient rms: 8.2541E-05 \* ( 3.0000E-04 )  
 step size: 0.01040 trust radius: 0.30000  
 displacement maximum: 4.7711E-03 . ( 1.8000E-03 )  
 displacement rms: 9.4146E-04 \* ( 1.2000E-03 )  
 predicted energy change: -1.9758E-06 geom step: 1.0399E-02  
 02 full step: 1.0399E-02  
 molecular structure not yet converged...

center of mass moved by:

x: -2.9823E-04 y: 1.5662E-04 z: 1.7481E-05

new geometry:

|      |               |               |               | angstroms |  |  |
|------|---------------|---------------|---------------|-----------|--|--|
| atom | x             | y             | z             |           |  |  |
| H1   | -0.2888469178 | 1.3336875735  | -2.0563528799 |           |  |  |
| C1   | -0.1826088041 | 1.7714963081  | -1.0820807793 |           |  |  |
| C2   | 0.1210101070  | 2.9159260429  | 1.4069493971  |           |  |  |
| C3   | 0.2220891920  | 0.9746121353  | -0.0246497933 |           |  |  |
| C4   | -0.4445529615 | 3.1240220324  | -0.9147162753 |           |  |  |
| C5   | -0.2992847690 | 3.6891527640  | 0.3353636715  |           |  |  |
| C6   | 0.3972877766  | 1.5658560941  | 1.2346348561  |           |  |  |
| C7   | 0.5724637974  | -0.4998087279 | -0.1509217160 |           |  |  |
| H3   | -0.7574530211 | 3.7192870532  | -1.7538012569 |           |  |  |
| H4   | -0.5078395944 | 4.7332516039  | 0.4897122237  |           |  |  |
| H6   | 0.2285263218  | 3.3733796141  | 2.3708674379  |           |  |  |
| H7   | 1.6610043180  | -0.5461132402 | -0.1681763113 |           |  |  |
| C10  | 0.0996664997  | -1.2179441528 | -1.4066538220 |           |  |  |

|     |               |               |               |
|-----|---------------|---------------|---------------|
| C8  | 0.1557075276  | -1.2390408567 | 1.1402279300  |
| C17 | -1.3543203040 | -1.3718269453 | 1.3928672658  |
| N2  | 0.8877093494  | 0.7955144879  | 2.3137767970  |
| C9  | 0.7838769053  | -0.5707873750 | 2.3477329037  |
| C16 | 1.4400379180  | 1.4622473192  | 3.4846465068  |
| O1  | 1.1435095937  | -1.2137132613 | 3.2948186721  |
| C11 | -0.7031535449 | -2.6684073366 | -3.6662255175 |
| C12 | 0.9985732118  | -2.0184164428 | -2.1023476404 |
| C13 | -1.2138999209 | -1.1534340226 | -1.8698038217 |
| C14 | -1.6107861530 | -1.8698031420 | -2.9863708228 |
| C15 | 0.6046676707  | -2.7396282884 | -3.2200883295 |
| H19 | 2.0201525407  | -2.0821704176 | -1.7679210621 |
| H20 | -1.9306684938 | -0.5340689467 | -1.3623185628 |
| H21 | -2.6299550820 | -1.8029487434 | -3.3253123090 |
| H22 | 1.3212999336  | -3.3522206553 | -3.7388175324 |
| H23 | -1.0129371915 | -3.2246072710 | -4.5333718478 |
| H27 | -1.8545109342 | -0.4088370770 | 1.3789510031  |
| H29 | -1.8134240560 | -2.0068722202 | 0.6467807049  |
| H30 | 0.5815417810  | -2.2348314475 | 1.1207308771  |
| H15 | -1.5152587625 | -1.8255754651 | 2.3642365784  |
| H2  | 2.1056102265  | 2.2560944599  | 3.1698747533  |
| H5  | 1.9877959242  | 0.7357324650  | 4.0591543802  |
| H8  | 0.6581400897  | 1.8817569205  | 4.1100780995  |

nuclear repulsion energy..... 1397.147934322 hartrees

-----  
 / end of geometry optimization iteration 12 /  
 -----

end of program geopt

start of program onee

smallest eigenvalue of S: 3.364E-04

number of canonical orbitals..... 368

end of program onee

start of program probe

end of program probe

start of program grid

number of gridpoints:

| atom     | H1  | C1 | C2 | C3 | C4 | C5 | C6 |
|----------|-----|----|----|----|----|----|----|
| C7       |     |    |    |    |    |    |    |
| grid # 1 | 71  | 88 | 89 | 88 | 89 | 87 | 86 |
| 81       |     |    |    |    |    |    |    |
| grid # 2 | 115 | 96 | 95 | 97 | 97 | 97 | 93 |
| 90       |     |    |    |    |    |    |    |

|          |     |     |     |     |     |     |     |
|----------|-----|-----|-----|-----|-----|-----|-----|
| grid # 3 | 210 | 184 | 182 | 192 | 182 | 183 | 192 |
| 176      |     |     |     |     |     |     |     |
| grid # 4 | 208 | 327 | 326 | 340 | 327 | 327 | 327 |
| 312      |     |     |     |     |     |     |     |

number of gridpoints:

|          |     |     |     |     |     |     |     |
|----------|-----|-----|-----|-----|-----|-----|-----|
| atom     | H3  | H4  | H6  | H7  | C10 | C8  | C17 |
| N2       |     |     |     |     |     |     |     |
| grid # 1 | 73  | 73  | 70  | 67  | 92  | 82  | 74  |
| 94       |     |     |     |     |     |     |     |
| grid # 2 | 118 | 118 | 112 | 106 | 100 | 90  | 80  |
| 104      |     |     |     |     |     |     |     |
| grid # 3 | 223 | 223 | 207 | 207 | 196 | 174 | 147 |
| 211      |     |     |     |     |     |     |     |
| grid # 4 | 224 | 223 | 206 | 204 | 341 | 314 | 285 |
| 390      |     |     |     |     |     |     |     |

number of gridpoints:

|          |     |     |     |     |     |     |     |
|----------|-----|-----|-----|-----|-----|-----|-----|
| atom     | C9  | C16 | O1  | C11 | C12 | C13 | C14 |
| C15      |     |     |     |     |     |     |     |
| grid # 1 | 81  | 71  | 110 | 89  | 88  | 87  | 89  |
| 89       |     |     |     |     |     |     |     |
| grid # 2 | 91  | 79  | 122 | 97  | 95  | 95  | 95  |
| 97       |     |     |     |     |     |     |     |
| grid # 3 | 176 | 142 | 260 | 184 | 182 | 182 | 183 |
| 184      |     |     |     |     |     |     |     |
| grid # 4 | 293 | 272 | 456 | 328 | 326 | 325 | 326 |
| 328      |     |     |     |     |     |     |     |

number of gridpoints:

|          |     |     |     |     |     |     |     |
|----------|-----|-----|-----|-----|-----|-----|-----|
| atom     | H19 | H20 | H21 | H22 | H23 | H27 | H29 |
| H30      |     |     |     |     |     |     |     |
| grid # 1 | 72  | 69  | 73  | 73  | 73  | 72  | 71  |
| 69       |     |     |     |     |     |     |     |
| grid # 2 | 112 | 111 | 118 | 118 | 118 | 110 | 109 |
| 109      |     |     |     |     |     |     |     |
| grid # 3 | 214 | 209 | 223 | 223 | 224 | 215 | 210 |
| 214      |     |     |     |     |     |     |     |
| grid # 4 | 213 | 205 | 223 | 223 | 224 | 212 | 207 |
| 208      |     |     |     |     |     |     |     |

number of gridpoints:

|          |     |     |     |     |       |
|----------|-----|-----|-----|-----|-------|
| atom     | H15 | H2  | H5  | H8  | total |
| grid # 1 | 71  | 71  | 70  | 71  | 2863  |
| grid # 2 | 110 | 111 | 108 | 111 | 3724  |
| grid # 3 | 219 | 215 | 212 | 217 | 7177  |
| grid # 4 | 218 | 213 | 209 | 218 | 9908  |

end of program grid

start of program rwr

recomputing RWR matrix 16 grid: 4  
end of program rwr

start of program scf

|      | i | u | d | i | g |                  | RMS     | maximum |
|------|---|---|---|---|---|------------------|---------|---------|
|      | t | p | i | c | r |                  | energy  | DIIS    |
|      | e | d | i | u | i | total energy     | density | error   |
|      | r | t | s | t | d | change           | change  |         |
| etot | 1 | N | N | 1 | U | -783.03046880242 | 2.5E-05 | 2.9E-04 |
| etot | 2 | Y | Y | 4 | M | -783.03050108369 | 3.2E-05 | 1.1E-04 |
| etot | 3 | Y | Y | 4 | M | -783.03050613291 | 5.0E-06 | 3.4E-05 |
| etot | 4 | Y | N | 4 | M | -783.03050627684 | 1.4E-07 | 0.0E+00 |

Energy components, in hartrees:

|     |                               |                   |       |
|-----|-------------------------------|-------------------|-------|
| (A) | Nuclear repulsion.....        | 1397.14793432183  |       |
| (E) | Total one-electron terms..... | -3838.66971023152 |       |
| (I) | Total two-electron terms..... | 1658.49126963285  |       |
| (L) | Electronic energy.....        | -2180.17844059866 | (E+I) |
| (N) | Total energy.....             | -783.03050627684  | (A+L) |

SCFE: SCF energy: HF -783.03050627684 hartrees iterations:  
4

HOMO energy: -0.30123  
LUMO energy: 0.12995

Orbital energies:

|           |           |           |           |           |           |
|-----------|-----------|-----------|-----------|-----------|-----------|
| -20.52431 | -15.60133 | -11.34393 | -11.28553 | -11.25549 | -11.25112 |
| -11.24498 | -11.24342 | -11.24066 | -11.23722 | -11.23621 | -11.23563 |
| -11.23489 | -11.23416 | -11.23374 | -11.23345 | -11.23336 | -11.22835 |
| -11.21922 | -1.39523  | -1.26895  | -1.16837  | -1.14903  | -1.10742  |
| -1.03260  | -1.02085  | -1.01903  | -1.01563  | -0.95806  | -0.93990  |
| -0.85714  | -0.84746  | -0.83283  | -0.82939  | -0.78968  | -0.74190  |
| -0.71156  | -0.69809  | -0.66967  | -0.66205  | -0.64794  | -0.63524  |
| -0.63374  | -0.61766  | -0.61097  | -0.60121  | -0.60086  | -0.58701  |
| -0.57714  | -0.56653  | -0.55179  | -0.54758  | -0.52446  | -0.52139  |
| -0.51766  | -0.51188  | -0.50440  | -0.49274  | -0.48255  | -0.47665  |
| -0.46694  | -0.41964  | -0.40856  | -0.34089  | -0.33675  | -0.32833  |
| -0.30123  | 0.12995   | 0.13538   | 0.14003   | 0.14900   | 0.20694   |
| 0.23319   | 0.24137   | 0.25594   | 0.26432   | 0.26848   |           |

end of program scf

start of program derla  
end of program derla

start of program rwr  
recomputing RwR matrix 16 grid: 4  
end of program rwr

start of program der1b

forces (hartrees/bohr) : total

| atom  | label | x             | y             | z             |
|-------|-------|---------------|---------------|---------------|
| 1     | H1    | 1.979650E-05  | -2.125731E-06 | 2.213030E-05  |
| 2     | C1    | 5.386030E-05  | -2.347237E-04 | 2.981331E-06  |
| 3     | C2    | -4.508377E-05 | 1.798364E-04  | -2.923902E-05 |
| 4     | C3    | 1.894356E-05  | -6.997009E-05 | -1.000931E-05 |
| 5     | C4    | -1.764153E-06 | 2.161340E-04  | 1.366070E-04  |
| 6     | C5    | -3.957043E-05 | 9.696441E-05  | -6.771436E-05 |
| 7     | C6    | 5.327482E-05  | -1.626740E-04 | -1.211905E-04 |
| 8     | C7    | -2.572767E-05 | 7.445352E-05  | 3.268646E-05  |
| 9     | H3    | 2.945803E-05  | -2.195525E-05 | 6.015338E-05  |
| 10    | H4    | 1.924495E-05  | -3.801340E-05 | -1.645908E-05 |
| 11    | H6    | -9.022157E-06 | 1.760755E-05  | -4.354284E-05 |
| 12    | H7    | 3.457116E-05  | -1.400594E-06 | -1.432195E-05 |
| 13    | C10   | 1.889606E-06  | -9.010297E-05 | -1.068424E-04 |
| 14    | C8    | -2.738016E-05 | 2.323841E-05  | 5.695785E-05  |
| 15    | C17   | 1.357747E-05  | -1.253223E-05 | -1.044309E-04 |
| 16    | N2    | -5.643335E-05 | -1.096662E-04 | 1.139320E-04  |
| 17    | C9    | -2.761392E-06 | -1.579447E-05 | -3.181960E-04 |
| 18    | C16   | 1.261078E-04  | 3.550120E-04  | -9.652122E-05 |
| 19    | O1    | 6.101126E-05  | -1.334813E-04 | 2.140386E-04  |
| 20    | C11   | -8.193691E-05 | 9.475484E-05  | 5.967980E-05  |
| 21    | C12   | 3.496694E-05  | -1.127337E-04 | -1.453341E-04 |
| 22    | C13   | -1.600670E-04 | -8.650379E-05 | -1.794056E-04 |
| 23    | C14   | 3.016052E-05  | 9.677616E-05  | 1.185685E-04  |
| 24    | C15   | 1.619456E-04  | 8.884082E-05  | 1.504091E-04  |
| 25    | H19   | -3.645716E-05 | 1.322414E-05  | -4.821011E-05 |
| 26    | H20   | 5.076817E-05  | -7.660128E-05 | -5.050839E-05 |
| 27    | H21   | 4.238381E-05  | -3.476080E-06 | 7.993083E-06  |
| 28    | H22   | -5.727967E-05 | 8.436068E-05  | 1.129926E-05  |
| 29    | H23   | -1.118433E-05 | 3.047530E-05  | -1.143174E-05 |
| 30    | H27   | -7.087251E-09 | 4.622415E-05  | -7.413778E-06 |
| 31    | H29   | -5.302039E-07 | -3.477520E-06 | -8.306447E-06 |
| 32    | H30   | 3.781358E-06  | -3.265429E-06 | -2.841010E-05 |
| 33    | H15   | 5.481848E-07  | -2.264069E-05 | -5.782645E-06 |
| 34    | H2    | -3.173334E-05 | -7.297815E-05 | 9.779004E-05  |
| 35    | H5    | 1.289324E-05  | -3.093760E-05 | -6.087909E-05 |
| 36    | H8    | -2.357347E-05 | -1.780480E-05 | 9.203421E-07  |
| total |       | 1.586710E-04  | 9.504341E-05  | -3.880025E-04 |

end of program der1b

start of program geopt 13

geometry optimization step 13

reading input hessian of dimension 108  
in five columns format  
reading input hessian of dimension 108  
in five columns format  
reading input hessian of dimension 108  
in five columns format

energy change: -3.7062E-05 \* ( 5.0000E-05 )  
gradient maximum: 3.6955E-04 \* ( 4.5000E-04 )  
gradient rms: 9.1746E-05 \* ( 3.0000E-04 )  
step size: 0.00542 trust radius: 0.30000  
displacement maximum: 2.4588E-03 . ( 1.8000E-03 )  
displacement rms: 4.9083E-04 \* ( 1.2000E-03 )  
predicted energy change: -1.3173E-06 geom step: 5.4214E-03  
03 full step: 5.4214E-03  
molecular structure not yet converged...

center of mass moved by:

x: -2.4852E-06 y: -2.1459E-04 z: 2.5391E-04

new geometry:

|      | angstroms     |               |               |
|------|---------------|---------------|---------------|
| atom | x             | y             | z             |
| H1   | -0.2862833722 | 1.3318712197  | -2.0567189923 |
| C1   | -0.1809303267 | 1.7700071779  | -1.0825824230 |
| C2   | 0.1205198605  | 2.9158186318  | 1.4060478219  |
| C3   | 0.2228741541  | 0.9735657038  | -0.0245867913 |
| C4   | -0.4430559476 | 3.1227927820  | -0.9159086233 |
| C5   | -0.2990027064 | 3.6886554031  | 0.3339084218  |
| C6   | 0.3972138629  | 1.5654874681  | 1.2344590411  |
| C7   | 0.5728168561  | -0.5009512484 | -0.1502123996 |
| H3   | -0.7552325257 | 3.7176261849  | -1.7554925941 |
| H4   | -0.5077833713 | 4.7327653479  | 0.4875324188  |
| H6   | 0.2270454280  | 3.3737062088  | 2.3698120568  |
| H7   | 1.6613804333  | -0.5476723650 | -0.1673747349 |
| C10  | 0.0997435778  | -1.2188480301 | -1.4061059146 |
| C8   | 0.1555886063  | -1.2395574787 | 1.1412004306  |
| C17  | -1.3545750180 | -1.3721271372 | 1.3932750753  |
| N2   | 0.8867295094  | 0.7956451202  | 2.3144567236  |
| C9   | 0.7836077976  | -0.5707792817 | 2.3485491189  |
| C16  | 1.4395360943  | 1.4636187201  | 3.4846581109  |
| O1   | 1.1433115894  | -1.2133552151 | 3.2959986320  |
| C11  | -0.7037199330 | -2.6659749470 | -3.6670679695 |
| C12  | 0.9988269535  | -2.0175696374 | -2.1034479134 |
| C13  | -1.2142912872 | -1.1545979424 | -1.8682416034 |
| C14  | -1.6115320037 | -1.8693248107 | -2.9854114730 |

S618

|     |               |               |               |
|-----|---------------|---------------|---------------|
| C15 | 0.6045776246  | -2.7370173862 | -3.2219380212 |
| H19 | 2.0206757321  | -2.0809454445 | -1.7700125456 |
| H20 | -1.9309775314 | -0.5364735035 | -1.3593970481 |
| H21 | -2.6309237423 | -1.8027277327 | -3.3235608519 |
| H22 | 1.3211370524  | -3.3479983340 | -3.7424292123 |
| H23 | -1.0136765307 | -3.2208278063 | -4.5349932315 |
| H27 | -1.8545624388 | -0.4089496519 | 1.3789730766  |
| H29 | -1.8135638288 | -2.0074385565 | 0.6473207082  |
| H30 | 0.5813486112  | -2.2354361449 | 1.1221712883  |
| H15 | -1.5159182988 | -1.8256235508 | 2.3647628838  |
| H2  | 2.1046454804  | 2.2574820413  | 3.1695663181  |
| H5  | 1.9879642059  | 0.7373603124  | 4.0590449669  |
| H8  | 0.6577029716  | 1.8828427117  | 4.1103818663  |

nuclear repulsion energy..... 1397.148047366 hartrees

-----  
 / end of geometry optimization iteration 13 /  
 -----

end of program geopt

start of program onee  
 smallest eigenvalue of S: 3.366E-04  
 number of canonical orbitals..... 368  
 end of program onee

start of program probe  
 end of program probe

start of program grid

number of gridpoints:

| atom     | H1  | C1  | C2  | C3  | C4  | C5  | C6  |
|----------|-----|-----|-----|-----|-----|-----|-----|
| C7       |     |     |     |     |     |     |     |
| grid # 1 | 71  | 88  | 89  | 88  | 89  | 87  | 86  |
| 81       |     |     |     |     |     |     |     |
| grid # 2 | 115 | 96  | 95  | 97  | 97  | 97  | 93  |
| 90       |     |     |     |     |     |     |     |
| grid # 3 | 210 | 184 | 182 | 192 | 182 | 183 | 192 |
| 176      |     |     |     |     |     |     |     |
| grid # 4 | 208 | 327 | 326 | 340 | 327 | 327 | 328 |
| 312      |     |     |     |     |     |     |     |

number of gridpoints:

| atom     | H3 | H4 | H6 | H7 | C10 | C8 | C17 |
|----------|----|----|----|----|-----|----|-----|
| N2       |    |    |    |    |     |    |     |
| grid # 1 | 73 | 73 | 70 | 67 | 92  | 82 | 73  |
| 94       |    |    |    |    |     |    |     |

|          |     |     |     |     |     |    |    |
|----------|-----|-----|-----|-----|-----|----|----|
| grid # 2 | 118 | 118 | 112 | 106 | 100 | 90 | 80 |
|----------|-----|-----|-----|-----|-----|----|----|

104

|          |     |     |     |     |     |     |     |
|----------|-----|-----|-----|-----|-----|-----|-----|
| grid # 3 | 223 | 223 | 207 | 207 | 196 | 174 | 147 |
|----------|-----|-----|-----|-----|-----|-----|-----|

211

|          |     |     |     |     |     |     |     |
|----------|-----|-----|-----|-----|-----|-----|-----|
| grid # 4 | 224 | 223 | 206 | 204 | 341 | 314 | 286 |
|----------|-----|-----|-----|-----|-----|-----|-----|

390

number of gridpoints:

|      |    |     |    |     |     |     |     |
|------|----|-----|----|-----|-----|-----|-----|
| atom | C9 | C16 | O1 | C11 | C12 | C13 | C14 |
|------|----|-----|----|-----|-----|-----|-----|

C15

|          |    |    |     |    |    |    |    |
|----------|----|----|-----|----|----|----|----|
| grid # 1 | 81 | 71 | 110 | 89 | 88 | 87 | 89 |
|----------|----|----|-----|----|----|----|----|

89

|          |    |    |     |    |    |    |    |
|----------|----|----|-----|----|----|----|----|
| grid # 2 | 91 | 79 | 122 | 97 | 95 | 95 | 95 |
|----------|----|----|-----|----|----|----|----|

97

|          |     |     |     |     |     |     |     |
|----------|-----|-----|-----|-----|-----|-----|-----|
| grid # 3 | 176 | 140 | 260 | 184 | 182 | 182 | 183 |
|----------|-----|-----|-----|-----|-----|-----|-----|

184

|          |     |     |     |     |     |     |     |
|----------|-----|-----|-----|-----|-----|-----|-----|
| grid # 4 | 293 | 272 | 456 | 328 | 326 | 325 | 326 |
|----------|-----|-----|-----|-----|-----|-----|-----|

328

number of gridpoints:

|      |     |     |     |     |     |     |     |
|------|-----|-----|-----|-----|-----|-----|-----|
| atom | H19 | H20 | H21 | H22 | H23 | H27 | H29 |
|------|-----|-----|-----|-----|-----|-----|-----|

H30

|          |    |    |    |    |    |    |    |
|----------|----|----|----|----|----|----|----|
| grid # 1 | 72 | 69 | 73 | 73 | 73 | 72 | 70 |
|----------|----|----|----|----|----|----|----|

69

|          |     |     |     |     |     |     |     |
|----------|-----|-----|-----|-----|-----|-----|-----|
| grid # 2 | 112 | 111 | 118 | 118 | 118 | 110 | 109 |
|----------|-----|-----|-----|-----|-----|-----|-----|

109

|          |     |     |     |     |     |     |     |
|----------|-----|-----|-----|-----|-----|-----|-----|
| grid # 3 | 214 | 209 | 223 | 223 | 224 | 215 | 210 |
|----------|-----|-----|-----|-----|-----|-----|-----|

214

|          |     |     |     |     |     |     |     |
|----------|-----|-----|-----|-----|-----|-----|-----|
| grid # 4 | 213 | 205 | 223 | 223 | 224 | 212 | 207 |
|----------|-----|-----|-----|-----|-----|-----|-----|

208

number of gridpoints:

|      |     |    |    |    |       |
|------|-----|----|----|----|-------|
| atom | H15 | H2 | H5 | H8 | total |
|------|-----|----|----|----|-------|

|          |     |     |     |     |      |
|----------|-----|-----|-----|-----|------|
| grid # 1 | 71  | 71  | 70  | 71  | 2861 |
| grid # 2 | 110 | 111 | 108 | 111 | 3724 |
| grid # 3 | 219 | 215 | 212 | 217 | 7175 |
| grid # 4 | 218 | 213 | 209 | 218 | 9910 |

end of program grid

start of program rwr  
recomputing RWR matrix 16 grid: 4  
end of program rwr

start of program scf

|   |   |   |   |   |              |         |         |
|---|---|---|---|---|--------------|---------|---------|
| i | u | d | i | g |              |         |         |
| t | p | i | c | r |              |         |         |
| e | d | i | u | i |              | RMS     | maximum |
| r | t | s | t | d | total energy | energy  | DIIS    |
|   |   |   |   |   | change       | density | error   |
|   |   |   |   |   |              | change  |         |



|      |   |   |   |   |   |                  |         |         |         |
|------|---|---|---|---|---|------------------|---------|---------|---------|
| etot | 1 | N | N | 1 | U | -783.03049309564 |         | 1.3E-05 | 2.5E-04 |
| etot | 2 | Y | Y | 4 | M | -783.03050193703 | 8.8E-06 | 3.5E-06 | 7.7E-05 |
| etot | 3 | Y | N | 4 | M | -783.03050255184 | 6.1E-07 | 0.0E+00 | 0.0E+00 |

Energy components, in hartrees:

|     |                               |                   |       |
|-----|-------------------------------|-------------------|-------|
| (A) | Nuclear repulsion.....        | 1397.14804736617  |       |
| (E) | Total one-electron terms..... | -3838.67138498744 |       |
| (I) | Total two-electron terms..... | 1658.49283506943  |       |
| (L) | Electronic energy.....        | -2180.17854991801 | (E+I) |
| (N) | Total energy.....             | -783.03050255184  | (A+L) |

SCFE: SCF energy: HF -783.03050255184 hartrees iterations:  
3

HOMO energy: -0.30120  
LUMO energy: 0.12991

Orbital energies:

|           |           |           |           |           |           |
|-----------|-----------|-----------|-----------|-----------|-----------|
| -20.52431 | -15.60127 | -11.34396 | -11.28549 | -11.25550 | -11.25112 |
| -11.24497 | -11.24339 | -11.24069 | -11.23721 | -11.23618 | -11.23561 |
| -11.23487 | -11.23415 | -11.23371 | -11.23343 | -11.23334 | -11.22834 |
| -11.21925 | -1.39512  | -1.26884  | -1.16839  | -1.14901  | -1.10741  |
| -1.03260  | -1.02091  | -1.01901  | -1.01558  | -0.95805  | -0.93990  |
| -0.85714  | -0.84742  | -0.83284  | -0.82940  | -0.78970  | -0.74186  |
| -0.71154  | -0.69811  | -0.66965  | -0.66203  | -0.64791  | -0.63525  |
| -0.63373  | -0.61762  | -0.61093  | -0.60119  | -0.60084  | -0.58709  |
| -0.57713  | -0.56654  | -0.55175  | -0.54758  | -0.52445  | -0.52138  |
| -0.51766  | -0.51187  | -0.50441  | -0.49273  | -0.48255  | -0.47663  |
| -0.46694  | -0.41960  | -0.40855  | -0.34091  | -0.33681  | -0.32829  |
| -0.30120  | 0.12991   | 0.13543   | 0.14005   | 0.14900   | 0.20693   |
| 0.23321   | 0.24136   | 0.25592   | 0.26428   | 0.26847   |           |

end of program scf

start of program derla  
end of program derla

start of program rwr  
recomputing RWR matrix 16 grid: 4  
end of program rwr

start of program derlb

forces (hartrees/bohr) : total

|      |       |   |   |   |
|------|-------|---|---|---|
| atom | label | x | y | z |
|------|-------|---|---|---|

|       |     |               |               |               |
|-------|-----|---------------|---------------|---------------|
| 1     | H1  | -1.987531E-05 | -1.516714E-05 | -1.903340E-05 |
| 2     | C1  | 3.744530E-07  | 4.207960E-05  | 4.147687E-05  |
| 3     | C2  | 1.578883E-05  | -5.541063E-06 | -4.642183E-05 |
| 4     | C3  | 1.723961E-05  | -5.782158E-06 | 7.209217E-06  |
| 5     | C4  | 4.443375E-06  | 4.055476E-05  | 3.097308E-05  |
| 6     | C5  | -3.229671E-06 | -2.178495E-05 | -7.183730E-05 |
| 7     | C6  | -1.846592E-05 | -2.394338E-05 | -2.361599E-05 |
| 8     | C7  | -4.398903E-06 | 3.430284E-05  | 2.227726E-05  |
| 9     | H3  | -8.956332E-07 | -1.258890E-05 | 2.183907E-05  |
| 10    | H4  | 1.042585E-05  | -1.593563E-05 | -1.060012E-06 |
| 11    | H6  | 2.751038E-05  | 6.990097E-06  | 1.027428E-05  |
| 12    | H7  | 5.264690E-06  | -7.826399E-06 | -1.197869E-05 |
| 13    | C10 | -5.291733E-05 | 3.412756E-05  | -2.622123E-05 |
| 14    | C8  | -6.317502E-06 | -1.105236E-05 | -8.245999E-06 |
| 15    | C17 | 4.227870E-06  | 7.028878E-06  | -1.887064E-05 |
| 16    | N2  | 6.323661E-05  | 6.543782E-05  | 7.716588E-06  |
| 17    | C9  | 4.207819E-06  | -2.989634E-05 | -1.904768E-05 |
| 18    | C16 | 4.225031E-05  | -3.369947E-05 | -1.078110E-05 |
| 19    | O1  | 1.564743E-05  | -1.357047E-05 | 9.358162E-06  |
| 20    | C11 | 5.515261E-05  | -1.148810E-05 | 9.711405E-06  |
| 21    | C12 | 4.311960E-06  | -2.513094E-05 | -5.856663E-05 |
| 22    | C13 | 4.619916E-06  | 2.661507E-05  | -2.454506E-05 |
| 23    | C14 | 1.606979E-05  | 2.859720E-05  | 1.024806E-05  |
| 24    | C15 | -3.854745E-05 | -1.033737E-05 | -1.833781E-05 |
| 25    | H19 | 1.706204E-06  | -2.965837E-06 | -7.619552E-06 |
| 26    | H20 | 1.150856E-05  | 1.629952E-05  | -2.895732E-05 |
| 27    | H21 | 1.320055E-05  | 1.450251E-05  | -1.157938E-05 |
| 28    | H22 | -9.853184E-06 | -6.776160E-06 | 3.510858E-06  |
| 29    | H23 | 1.440142E-06  | -8.550372E-06 | -9.347655E-06 |
| 30    | H27 | 8.680040E-06  | -1.384774E-05 | -1.067727E-05 |
| 31    | H29 | 2.153543E-05  | 2.004621E-05  | -4.373160E-06 |
| 32    | H30 | -3.758161E-06 | 2.572625E-05  | -1.379801E-05 |
| 33    | H15 | 9.954203E-06  | 7.366788E-06  | -3.337640E-05 |
| 34    | H2  | 2.858579E-06  | -2.214560E-06 | -1.085833E-05 |
| 35    | H5  | -2.709828E-05 | 2.659405E-05  | -5.259928E-05 |
| 36    | H8  | -4.805758E-06 | -1.754611E-05 | -8.034572E-06 |
| total |     | 1.714921E-04  | 1.006237E-04  | -3.751894E-04 |

end of program derlb

start of program geopt 14

geometry optimization step 14  
 reading input hessian of dimension 108  
 in five columns format  
 reading input hessian of dimension 108  
 in five columns format  
 reading input hessian of dimension 108  
 in five columns format

```

energy change:          3.7250E-06 * ( 5.0000E-05 )
gradient maximum:      2.0349E-04 * ( 4.5000E-04 )
gradient rms:          4.6676E-05 # ( 3.0000E-04 )
step size: 0.00392 trust radius: 0.30000
displacement maximum: 1.4863E-03 * ( 1.8000E-03 )
displacement rms:      3.5522E-04 * ( 1.2000E-03 )
predicted energy change: -5.3436E-07 geom step: 3.9236E-
03 full step: 3.9236E-03

```

```

*****
**                      Geometry optimization complete                      **
*****

```

```

center of mass moved by:
  x: 0.0000E+00   y: 0.0000E+00   z: 0.0000E+00

```

final geometry:

|      | angstroms     |               |               |
|------|---------------|---------------|---------------|
| atom | x             | y             | z             |
| H1   | -0.2862833722 | 1.3318712197  | -2.0567189923 |
| C1   | -0.1809303267 | 1.7700071779  | -1.0825824230 |
| C2   | 0.1205198605  | 2.9158186318  | 1.4060478219  |
| C3   | 0.2228741541  | 0.9735657038  | -0.0245867913 |
| C4   | -0.4430559476 | 3.1227927820  | -0.9159086233 |
| C5   | -0.2990027064 | 3.6886554031  | 0.3339084218  |
| C6   | 0.3972138629  | 1.5654874681  | 1.2344590411  |
| C7   | 0.5728168561  | -0.5009512484 | -0.1502123996 |
| H3   | -0.7552325257 | 3.7176261849  | -1.7554925941 |
| H4   | -0.5077833713 | 4.7327653479  | 0.4875324188  |
| H6   | 0.2270454280  | 3.3737062088  | 2.3698120568  |
| H7   | 1.6613804333  | -0.5476723650 | -0.1673747349 |
| C10  | 0.0997435778  | -1.2188480301 | -1.4061059146 |
| C8   | 0.1555886063  | -1.2395574787 | 1.1412004306  |
| C17  | -1.3545750180 | -1.3721271372 | 1.3932750753  |
| N2   | 0.8867295094  | 0.7956451202  | 2.3144567236  |
| C9   | 0.7836077976  | -0.5707792817 | 2.3485491189  |
| C16  | 1.4395360943  | 1.4636187201  | 3.4846581109  |
| O1   | 1.1433115894  | -1.2133552151 | 3.2959986320  |
| C11  | -0.7037199330 | -2.6659749470 | -3.6670679695 |
| C12  | 0.9988269535  | -2.0175696374 | -2.1034479134 |
| C13  | -1.2142912872 | -1.1545979424 | -1.8682416034 |
| C14  | -1.6115320037 | -1.8693248107 | -2.9854114730 |
| C15  | 0.6045776246  | -2.7370173862 | -3.2219380212 |
| H19  | 2.0206757321  | -2.0809454445 | -1.7700125456 |
| H20  | -1.9309775314 | -0.5364735035 | -1.3593970481 |
| H21  | -2.6309237423 | -1.8027277327 | -3.3235608519 |
| H22  | 1.3211370524  | -3.3479983340 | -3.7424292123 |
| H23  | -1.0136765307 | -3.2208278063 | -4.5349932315 |
| H27  | -1.8545624388 | -0.4089496519 | 1.3789730766  |
| H29  | -1.8135638288 | -2.0074385565 | 0.6473207082  |

|     |               |               |              |
|-----|---------------|---------------|--------------|
| H30 | 0.5813486112  | -2.2354361449 | 1.1221712883 |
| H15 | -1.5159182988 | -1.8256235508 | 2.3647628838 |
| H2  | 2.1046454804  | 2.2574820413  | 3.1695663181 |
| H5  | 1.9879642059  | 0.7373603124  | 4.0590449669 |
| H8  | 0.6577029716  | 1.8828427117  | 4.1103818663 |

nuclear repulsion energy..... 1397.148047366 hartrees

-----  
/ end of geometry optimization iteration 14 /  
-----

end of program geopt

start of program post  
Writing a SPARTAN archive file  
end of program post

Total cpu seconds      user:      965.859      user+sys:      965.859

Summary calculation on *trans* (**9**) and *cis* (**10**) derivatives

| Sample  | stereo         | HF          | $\Delta G$ | %<br>rel | weighted<br>HF | $\Delta G$ | %<br>rel |
|---------|----------------|-------------|------------|----------|----------------|------------|----------|
| Trans 1 | (eq-eq)        | -491330.559 | 0.654      | 75       | 491330.390     | 0.593      | 73       |
| Trans 2 | (ax-ax)        | -491329.905 |            | 25       |                |            |          |
| Cis 1   | (Ph eq_met ax) | -491328.149 | 1.732      | 5        | 491329.797     |            | 27       |
| Cis 2   | (Ph ax_met eq) | -491329.881 |            | 95       |                |            |          |
